# Supplementary material for: Emerging investigator series: nontargeted screening of aryl hydrocarbon receptor agonists in endangered beluga whales from the St. Lawrence Estuary: beyond legacy contaminants
Source: Royal Society of Chemistry journal article supplement (doi:10.1039/d4em00243a), 2024-01-01
Supplement: d4em00243a2.xlsx [file d4em00243a2.xlsx]

## Sheet: Sheet1
Supplementary Data 1. Nontargeted detection of organohalogens in beluga extracts.
m/z	RT	2000s SLE Liver	1990s SLE Blubber	2000s SLE Blubber	2014 Arctic Blubber	Predicted Formula	ppm	Class
272.946	6.31	100	100	330000	9400	C12H6OCl3	-0.6	PCBs
304.91	7.38	55200	840000	10600000	294000	C12H5OCl4	1.2	PCBs
340.868	7.78	425000	3310000	55200000	691000	C12H4OCl5	0.5	PCBs
374.829	8.27	295000	2550000	34000000	323000	C12H3OCl6	0.9	PCBs
406.793	9.03	100	175000	2650000	115000	C12H2OCl7	0.3	PCBs
444.748	9.99	10600	100	717000	100	C12H8OCl8	0.9	PCBs
284.928	6.45	100	100	324000	100	C12H4O2Cl3	-1.5	OH-PCBs
304.936	5.7	100	100	401000	24200	C12H6O3Cl3	-0.7	OH-PCBs
428.779	8.94	100	100	136000	100	C12H2O2Cl7	0.2	OH-PCBs
316.962	4.78	100	264000	1810000	130000	C13H9O3Cl2S	1.3	Me-SO2-PCBs
348.927	5.01	215000	10800000	40400000	135000	C13H8O3Cl3S	0.8	Me-SO2-PCBs
384.885	5.33	274000	15900000	80000000	72500	C13H7O3Cl4S	0.9	Me-SO2-PCBs
388.821	6.08	100	62500	598000	42000	C13H7O3Cl4S	0.5	Me-SO2-PCBs
418.846	5.67	100	1250000	8160000	13400	C13H6O3Cl5S	0.3	Me-SO2-PCBs
364.924	5.07	100	255000	1180000	100	C13H8O4Cl3S	0.5	OH-Me-SO2-PCBs
363.958	5.41	81500	145000	86400	124000	C13H10O6Cl2S	0.7	OH-Me-SO2-PCBs
277.991	5.65	100	100	392000	9650	C14H8O2Cl2	-0.3	Organochlorine-related
368.839	5.5	100	311000	3790000	474000	C10H5O2Cl6	0.2	Organochlorine-related
404.798	6.19	100	404700000	2260000	256000	C10H4O2Cl7	0.6	Organochlorine-related
420.785	6.54	100	100	3950000	335000	C10H5OCl8	0	Organochlorine-related
448.774	6.97	100	100	1730000	116000	C10H8Cl9	1.3	Organochlorine-related
514.643	7.49	100	100	312000	100	C10Cl11	0.1	Organochlorine-related
435.778	7.06	100	100	944000	8060	C12H5O3Br3	0.4	PBDE-related
498.701	6.71	100	100	248000	88100	C12H5O2Br4	0.5	PBDE-related
450.801	7.8	100	100	1220000	33500	C13H8O3Br3	0.9	PBDE-related
578.61	5.95	100	100	560000	5540	C12H4O2Br5	0	PBDE-related
193.961	4.03	14200000	83200	212000	100	C8H5NBr	0	Natual Product
335.725	7.03	100	100	240000	100	C4NBr3Cl	1.2	Natual Product
510.671	6.47	100	100	637000	100	C9H4ON2Br4Cl	0	Natual Product
480.66	5.06	100	100	770000	100	C8H2N2Br4Cl	0.2	Natual Product
285.904	3.62	100	620000	1300000	1300000	C8H3Cl3O5	0.5	Unknown
321.01	5.95	100	680000	68000	100	C13H14O2NCl3	1	Unknown
348.995	7.23	100	100	120000	100	C10H2N3Cl5	0.9	Unknown
478.709	11.14	100	100	100000	100	C12H3OCl8S	0.4	Unknown
500.898	7.29	100	100	800000	100	C17H11O2N3Cl6	0.8	Unknown
Note: Intensity values of 100 denote < LOD.
