# Supplementary material for: Emerging investigator series: nontargeted screening of aryl hydrocarbon receptor agonists in endangered beluga whales from the St. Lawrence Estuary: beyond legacy contaminants
Source: Royal Society of Chemistry journal article supplement (doi:10.1039/d4em00243a), 2024-01-01
Supplement: d4em00243a3.csv [file d4em00243a3.csv]

ID	mz	MonoisotopicMass	MolecularFormula	SMILES	fragmz_10eV	fragIC_10eV	fragmz_20eV	fragIC_20eV	fragmz_40eV	fragIC_40eV
1	185.03565	186.0429274	C10H6N2O2	C1=CC(=C(C=C1C=C(C#N)C#N)O)O	77.01452; 185.03565	1.75; 100.00	156.00910; 185.03565	12.09; 100.00	50.00362; 77.01452; 101.01452; 113.01452; 156.00910; 158.02475; 185.03565	28.80; 59.80; 18.12; 20.30; 100.00; 91.04; 87.00
2	337.20339	338.2106615	C20H26N4O	CCN(CC)C(=O)NC1CN(C2CC3=CNC4=CC=CC(=C34)C2=C1)C	41.99854; 238.13497; 337.20338	15.70; 12.37; 100.00	41.99854; 42.03492; 70.06622; 72.08187; 115.08769; 221.10842; 223.12407; 238.13497; 335.18773; 337.20338	100.00; 9.93; 10.64; 9.99; 14.32; 17.78; 81.12; 43.39; 23.22; 87.63	41.99854; 44.01419; 221.10842; 222.10367; 238.13497; 250.09859; 264.11424; 266.12989; 335.18773	100.00; 22.42; 10.88; 45.27; 40.02; 19.14; 10.33; 7.77; 20.59
3	203.18052	204.1878008	C15H24	CC1CCC2C13CC=C(C(C3)C2(C)C)C	201.16487; 203.18052	0.18; 100.00	201.16487; 203.18052	1.10; 100.00	201.16487; 203.18052	70.44; 100.00
4	135.11792	136.1252005	C10H16	CC1=CCC2CC1C2(C)C	119.08662; 135.11792	0.22; 100.00	119.08662; 135.11792	2.09; 100.00	133.10227; 135.11792	45.70; 100.00
5	235.20674	236.2140155	C16H28O	CC1(CCCC2(C1CCC3(C2CCO3)C)C)C	233.19109; 235.20674	0.45; 100.00	217.19617; 235.20674	0.60; 100.00	233.19109; 235.20674	15.72; 100.00
6	135.11792	136.1252005	C10H16	CC1(C2CCC(=C)C1C2)C	119.08662; 135.11792	0.20; 100.00	119.08662; 135.11792	2.03; 100.00	133.10227; 135.11792	46.08; 100.00
7	293.16594	294.1732133	C19H22N2O	CCC12CCCN3C1C4=C(CC3)C5=CC=CC=C5N4C(=O)C2	265.17102; 293.16594; 0.074456	1.35; 100.00; 0.036832	251.15537; 293.16594	1.35; 100.00	77.03967; 215.11899; 223.12407; 249.13972; 251.11899; 251.15537; 263.11899; 265.13464; 265.17102; 267.15029; 277.13464; 291.15029; 293.16594	18.60; 17.93; 32.92; 41.52; 25.42; 47.21; 34.31; 47.22; 22.02; 21.59; 25.24; 100.00; 64.76
8	301.14453	302.1518092	C18H22O4	C1=CC(=CC(=C1)O)CC(CO)C(CC2=CC(=CC=C2)O)CO	283.13397; 301.14453	23.18; 100.00	107.05024; 175.07645; 241.12340; 251.10775; 253.12340; 255.13905; 269.11832; 271.13397; 273.14962; 283.13397; 299.12888; 301.14453	10.76; 17.60; 10.30; 24.13; 98.98; 31.95; 25.89; 46.18; 13.13; 44.61; 26.57; 100.00	93.03459; 99.08154; 107.05024; 119.05024; 161.06080; 163.07645; 173.06080; 175.07645; 177.09210; 233.11832; 239.10775; 253.12340; 299.12888	12.64; 5.30; 15.23; 6.40; 12.97; 12.73; 5.74; 7.73; 8.15; 6.90; 9.16; 11.20; 100.00
9	289.07176	290.0790382	C15H14O6	C1C(C(OC2=CC(=CC(=C21)O)O)C3=CC(=C(C=C3)O)O)O	137.02442; 289.07176	3.18; 100.00	109.02950; 121.02950; 123.04515; 125.02442; 137.02442; 139.04007; 141.05572; 149.02442; 163.04007; 165.01933; 167.03498; 179.03498; 271.06120; 289.07176	15.76; 61.48; 64.15; 88.84; 86.32; 56.87; 15.73; 19.86; 25.39; 28.56; 38.80; 23.21; 79.58; 100.00	41.00329; 43.01894; 65.00329; 67.01894; 68.99820; 69.03459; 93.03459; 97.02950; 109.02950; 111.04515; 121.02950; 123.04515; 125.06080; 137.02442; 139.04007; 165.01933; 177.01933; 179.03498; 201.01933; 205.05063; 217.05063; 219.06628; 231.06628; 243.06628; 259.06120; 271.06120	39.64; 12.84; 15.29; 31.72; 29.40; 28.59; 17.49; 13.41; 42.73; 15.90; 67.59; 100.00; 31.74; 72.20; 17.90; 25.07; 15.01; 9.51; 11.61; 19.87; 12.18; 31.11; 29.65; 13.18; 21.64; 18.90
10	457.07764	458.0849114	C22H18O11	C1C(C(OC2=CC(=CC(=C21)O)O)C3=CC(=C(C(=C3)O)O)O)OC(=O)C4=CC(=C(C(=C4)O)O)O	169.01425; 305.06668; 457.07763	92.34; 50.06; 100.00	65.00329; 97.02950; 107.01385; 111.00877; 123.00877; 125.02442; 137.02442; 139.00368; 139.04007; 151.00368; 153.01933; 155.03498; 166.99860; 169.01425; 271.06120; 287.05611; 289.07176; 305.06668; 331.04594; 397.05651; 415.06707; 429.08272; 439.06707; 457.07763	9.69; 14.03; 8.58; 11.38; 8.87; 100.00; 13.63; 17.50; 7.12; 46.13; 31.11; 9.88; 36.39; 67.66; 13.97; 44.54; 19.40; 9.74; 7.51; 7.41; 9.72; 14.50; 16.68; 27.07	41.00329; 53.00329; 65.00329; 68.99820; 83.01385; 96.99312; 97.02950; 107.01385; 109.02950; 111.04515; 123.00877; 125.02442; 137.02442; 141.05572; 153.01933; 166.99860; 169.01425; 315.01464; 317.03029; 319.04594; 357.06159; 359.07724; 371.07724; 383.04086; 385.05651; 387.07216; 397.05651; 399.07216; 415.06707; 439.06707; 455.06198	53.13; 23.54; 35.38; 14.91; 19.96; 25.11; 29.98; 26.06; 24.21; 24.30; 25.74; 93.74; 100.00; 22.17; 16.87; 20.47; 36.11; 18.74; 24.28; 25.85; 43.37; 43.49; 28.12; 18.82; 17.60; 43.38; 28.63; 37.50; 36.74; 21.61; 20.35
11	203.18052	204.1878008	C15H24	CC1(CCC=C2C13CCC(C3)C2(C)C)C	201.16487; 203.18052	0.21; 100.00	201.16487; 203.18052	0.77; 100.00	201.16487; 203.18052	44.18; 100.00
12	153.12849	154.1357652	C10H18O	CC1CCC(C(C1)O)C(=C)C	135.11792; 153.12849	4.40; 100.00	67.05532; 107.08662; 109.10227; 121.10227; 123.11792; 125.13357; 135.11792; 151.11284; 153.12849	4.65; 3.33; 4.80; 6.40; 10.65; 7.33; 24.84; 3.09; 100.00	41.03967; 43.01894; 43.05532; 55.05532; 63.02402; 65.03967; 67.05532; 69.03459; 69.07097; 79.05532; 81.07097; 91.05532; 95.08662; 109.10227; 119.08662; 135.11792; 151.11284; 153.12849	19.65; 45.74; 29.82; 42.78; 23.98; 79.80; 41.14; 19.15; 15.02; 75.69; 90.15; 23.22; 26.71; 20.61; 91.11; 100.00; 49.58; 32.23
13	210.07718	211.0844579	C10H13NO4	CC(CC1=CC(=C(C=C1)O)O)(C(=O)O)N	123.04515; 149.06080; 166.08735; 210.07718	33.08; 100.00; 51.94; 88.67	42.03492; 123.04515; 149.06080; 166.08735	14.15; 51.65; 100.00; 15.79	42.03492; 56.05057; 109.02950; 121.02950; 123.04515; 149.06080; 150.05605	8.53; 3.06; 100.00; 10.55; 10.44; 6.70; 10.94
14	178.12374	179.1310142	C11H17NO	CC(C(C1=CC=CC=C1)O)N(C)C	77.03967; 107.05024; 178.12374	80.75; 73.83; 100.00	68.05057; 70.06622; 77.03967; 91.05532; 107.05024; 115.05532; 117.07097; 119.08662; 160.11317; 178.12374	11.77; 44.12; 63.05; 12.68; 23.94; 26.46; 100.00; 25.84; 35.92; 44.40	55.01894; 57.03459; 77.03967; 115.05532; 117.03459; 117.07097; 121.06589	12.30; 6.93; 100.00; 5.99; 3.92; 6.22; 3.96
15	350.17617	351.1834437	C22H25NO3	CCC(C)COC(=O)C=CC1=CC=C(C=C1)N=CC2=CC=C(C=C2)OC	236.10809; 262.08735; 280.09792; 320.12922; 322.14487; 350.17617	10.10; 11.99; 14.08; 4.52; 13.29; 100.00	44.99820; 87.08154; 107.05024; 208.07679; 220.07679; 224.10809; 234.09244; 236.10809; 242.15504; 248.07170; 262.08735; 264.06662; 264.10300; 270.14995; 278.08227; 280.09792; 282.11357; 320.12922; 322.14487; 324.16052; 334.14487; 350.17617	5.25; 7.11; 9.87; 5.14; 19.58; 8.78; 6.29; 93.41; 7.06; 24.42; 57.48; 23.61; 46.74; 18.13; 34.93; 62.56; 5.68; 9.71; 9.23; 13.02; 8.04; 100.00	57.07097; 105.03459; 107.05024; 116.05057; 118.02984; 118.06622; 128.05057; 130.06622; 134.06114; 160.04040; 174.05605; 190.06622; 192.08187; 194.06114; 196.07679; 198.09244; 204.08187; 208.07679; 210.09244; 218.06114; 220.07679; 222.09244; 234.09244; 236.07170; 236.10809; 238.12374; 248.07170; 264.06662; 320.12922; 324.16052; 334.14487	5.15; 6.28; 14.59; 43.51; 18.40; 9.29; 18.46; 29.89; 17.61; 4.80; 5.96; 5.25; 9.36; 20.31; 8.94; 4.64; 5.88; 5.73; 14.29; 5.72; 75.03; 8.59; 14.78; 5.16; 100.00; 4.92; 5.23; 13.48; 6.33; 7.80; 6.13
16	353.17583	354.1831093	C22H26O4	CC1=C(C(=O)C(=C(C1=O)C)C(CCCCCC(=O)O)C2=CC=CC=C2)C	155.10775; 353.17583	39.23; 100.00	59.01385; 77.03967; 91.05532; 95.05024; 147.04515; 149.06080; 155.10775; 159.04515; 161.06080; 185.09719; 221.09719; 223.07645; 237.09210; 239.10775; 241.12340; 245.11832; 245.15470; 253.12340; 267.13905; 271.13397; 273.14962; 281.15470; 299.16527; 301.18092; 309.18600; 325.18092; 335.16527; 353.17583	4.95; 5.71; 7.32; 4.11; 6.00; 19.64; 20.42; 4.58; 4.61; 4.64; 5.49; 5.83; 3.68; 100.00; 4.32; 5.17; 5.16; 3.27; 2.92; 4.59; 4.28; 4.37; 17.09; 3.04; 15.06; 19.82; 8.09; 67.59	41.00329; 77.03967; 91.05532; 95.05024; 101.03967; 103.05532; 105.07097; 115.05532; 117.07097; 119.08662; 131.08662; 137.09719; 147.04515; 149.06080; 155.10775; 157.10227; 159.04515; 159.11792; 161.06080; 161.13357; 171.04515; 173.06080; 175.07645; 187.11284; 239.10775; 249.09210; 251.10775; 253.12340; 263.10775; 265.12340; 267.13905	25.25; 61.36; 62.28; 18.83; 18.20; 58.54; 36.14; 18.37; 49.78; 19.85; 15.29; 21.67; 38.53; 94.95; 54.83; 13.51; 18.22; 100.00; 22.08; 49.45; 45.83; 59.83; 37.30; 17.44; 15.48; 54.79; 30.68; 39.62; 51.70; 19.91; 18.09
17	221.19109	222.1983654	C15H26O	CC1CCC2C13CCC(C(C3)C2(C)C)(C)O	219.17544; 221.19109	3.92; 100.00	203.18052; 221.19109	1.77; 100.00	219.17544; 221.19109	75.87; 100.00
18	270.18634	271.1936144	C18H25NO	CC1C2CC3=C(C1(CCN2CC4CC4)C)C=C(C=C3)O	216.13939; 270.18634	1.07; 100.00	216.13939; 270.18634	16.03; 100.00	51.02402; 110.09752; 174.12882; 186.12882; 198.09244; 198.12882; 200.10809; 202.12374; 214.12374; 216.13939; 268.17069; 270.18634	7.48; 4.53; 3.34; 5.32; 7.86; 7.41; 100.00; 3.51; 22.53; 34.62; 3.15; 10.64
19	339.01964	340.0269143	C16H14Cl2O4	CC(C(=O)OC)OC1=CC=C(C=C1)OC2=C(C=C(C=C2)Cl)Cl	252.98286; 306.99342; 339.01964	32.48; 32.09; 100.00	34.96940; 55.01894; 57.03459; 85.02950; 160.95664; 252.98286; 275.01166; 278.99851; 281.01416; 306.99342; 339.01964	100.00; 37.34; 14.25; 18.61; 26.14; 78.75; 18.83; 15.50; 52.87; 18.84; 15.70	34.96940; 133.02950; 160.95664; 252.98286	100.00; 4.31; 8.02; 5.73
20	413.15405	414.1613285	C22H26N2O4S	CC(=O)OC1C(SC2=CC=CC=C2N(C1=O)CCN(C)C)C3=CC=C(C=C3)OC	296.07507; 342.08055; 353.13292; 356.09620; 385.15914; 413.15405	20.05; 5.36; 28.15; 8.68; 5.10; 100.00	42.03492; 59.01385; 107.05024; 187.08769; 221.07541; 225.05909; 261.12447; 282.05942; 284.07507; 293.09654; 296.07507; 298.05434; 300.06999; 308.07507; 310.09072; 312.06999; 313.13801; 314.08564; 324.06999; 326.08564; 339.11727; 340.06490; 341.13292; 342.08055; 353.13292; 356.09620; 367.11219; 369.12784; 371.14349; 385.15914; 413.15405	6.52; 79.43; 14.41; 5.82; 17.68; 6.29; 12.38; 35.17; 5.96; 100.00; 34.11; 23.02; 23.03; 8.37; 14.83; 12.50; 10.87; 17.60; 10.90; 19.01; 19.44; 5.89; 18.74; 14.18; 20.68; 11.46; 6.39; 8.50; 22.39; 9.81; 95.93	41.00329; 59.01385; 107.05024; 109.01174; 150.00191; 193.08049; 234.02304; 236.03869; 248.03869; 250.05434; 261.07032; 262.05434; 263.08597; 265.10162; 282.05942; 296.07507; 298.05434; 300.06999; 302.08564; 310.09072; 312.06999; 314.08564; 324.06999; 326.04925; 326.08564; 328.10129; 339.11727; 340.06490; 355.11219; 371.14349; 411.13840	17.91; 62.11; 10.91; 6.60; 8.11; 7.90; 8.81; 7.74; 7.52; 5.97; 6.56; 13.87; 14.26; 7.40; 15.04; 18.27; 70.67; 68.11; 11.97; 10.39; 63.26; 29.72; 19.04; 12.67; 100.00; 6.57; 8.49; 17.53; 14.90; 6.10; 20.77
21	415.35815	416.3654308	C28H48O2	CC1=C(C=C2CCC(OC2=C1C)(C)CCCC(C)CCCC(C)CCCC(C)C)O	413.34250; 415.35815	1.54; 100.00	133.06589; 137.06080; 149.06080; 151.07645; 161.06080; 163.07645; 413.34250; 415.35815	3.60; 4.25; 100.00; 22.26; 4.71; 3.81; 20.29; 70.68	67.01894; 69.03459; 79.01894; 81.03459; 93.03459; 95.01385; 95.05024; 109.06589; 121.06589; 133.06589; 135.04515; 149.06080; 151.07645; 161.06080; 163.07645; 165.09210; 175.07645; 189.09210; 203.10775; 249.25877; 263.27442; 267.26934; 275.27442; 277.25369; 277.29007; 279.26934; 359.33194; 361.31120; 381.31629; 399.32685; 413.34250	7.48; 7.44; 17.83; 17.33; 9.32; 14.36; 20.07; 6.86; 12.93; 7.87; 12.41; 100.00; 15.33; 14.33; 19.77; 6.26; 6.59; 9.48; 9.00; 7.12; 6.66; 11.37; 14.66; 12.73; 7.34; 23.52; 7.20; 11.88; 10.96; 22.10; 38.96
22	236.08477	237.0920418	C13H16ClNO	CNC1(CCCCC1=O)C2=CC=CC=C2Cl	124.07679; 236.08477	15.84; 100.00	34.96940; 93.03459; 95.05024; 106.06622; 111.00070; 124.07679; 205.04257; 236.08477	59.92; 75.51; 35.90; 36.02; 62.84; 46.56; 38.27; 100.00	34.96940; 81.03459; 83.05024; 92.05057; 93.03459; 95.05024; 108.04549; 111.00070; 120.04549; 171.08154; 180.05855; 205.04257; 207.05822; 234.06912	100.00; 4.67; 6.99; 4.86; 24.55; 19.60; 10.16; 12.46; 3.94; 7.16; 4.22; 5.90; 5.62; 18.69
23	205.03625	206.043522	C8H14O2S2	C1CSSC1CCCCC(=O)O	171.04852; 205.03625	11.48; 100.00	32.98044; 44.98044; 56.98044; 58.99609; 64.95252; 83.05024; 102.96817; 114.96817; 143.05361; 159.04852; 161.06417; 171.04852; 187.02568; 205.03625	11.33; 10.97; 9.01; 41.33; 8.66; 6.23; 55.96; 8.78; 7.30; 9.33; 14.87; 7.93; 18.32; 100.00	32.98044; 41.00329; 44.98044; 44.99820; 56.98044; 58.99609; 59.01385; 61.01174; 64.95252; 73.01174; 97.01174; 113.06080; 114.96817; 125.04304; 129.03796; 143.01722; 143.05361; 145.03287; 147.04852; 153.03796; 159.04852; 161.04642; 161.06417; 171.04852; 187.02568; 205.03625	96.28; 18.16; 7.63; 10.64; 54.19; 100.00; 35.78; 12.09; 51.23; 7.90; 8.42; 9.08; 28.26; 16.00; 36.34; 11.12; 15.83; 41.01; 14.32; 9.15; 8.79; 8.49; 10.54; 39.13; 8.29; 30.74
24	402.2187	403.2259772	C25H29N3O2	CN1CC(CC2C1CC3=CN(C4=CC=CC2=C34)C)CNC(=O)OCC5=CC=CC=C5	107.05024; 402.21870	10.97; 100.00	41.99854; 44.01419; 60.00910; 77.03967; 91.05532; 107.05024; 239.15537; 266.16627; 268.18192; 296.17684; 310.15610; 402.21870	91.70; 21.73; 11.70; 45.57; 28.93; 100.00; 25.85; 14.41; 72.00; 15.62; 13.81; 94.02	41.99854; 44.01419; 58.02984; 60.00910; 77.03967; 91.05532; 107.05024; 233.10842; 237.13972; 252.15062; 260.11932; 262.13497; 264.15062; 266.16627; 268.18192; 280.14554; 280.18192; 296.17684; 312.17175; 400.20305; 402.21870	100.00; 15.04; 7.71; 10.84; 37.01; 23.60; 15.57; 16.31; 7.57; 20.92; 7.10; 11.83; 11.83; 16.07; 10.89; 8.14; 5.64; 5.75; 7.04; 27.55; 9.54
25	154.16012	155.1673997	C10H21N	CC(CC1CCCCC1)NC	123.11792; 154.16012	14.71; 100.00	123.11792; 125.13357; 154.16012	33.84; 8.90; 100.00	40.01927; 42.03492; 81.07097; 83.08662; 93.07097; 95.08662; 97.10227; 121.10227; 123.11792; 125.13357; 154.16012	15.44; 33.63; 16.68; 19.88; 41.90; 14.88; 12.67; 62.67; 100.00; 17.72; 27.56
26	301.23843	302.2457096	C17H34O4	CCCCCCCCCCCCCC(=O)OCC(CO)O	43.01894; 59.01385; 73.02950; 91.04007; 209.19109; 227.20165; 301.23843	22.27; 49.10; 40.64; 15.94; 100.00; 22.23; 94.88	43.01894; 45.03459; 55.01894; 57.03459; 59.01385; 73.02950; 209.19109; 227.20165; 301.23843	22.07; 9.29; 15.65; 24.06; 39.71; 100.00; 49.19; 44.09; 11.04	41.00329; 44.99820; 59.01385; 61.02950; 71.01385; 73.02950; 75.04515; 99.04515; 101.06080; 103.07645; 113.06080; 113.13357; 115.07645; 117.09210; 127.07645; 127.14922; 129.09210; 131.10775; 141.09210; 143.10775; 145.12340; 155.10775; 157.12340; 169.12340; 171.13905; 173.15470; 197.15470; 209.19109; 211.20674; 225.18600; 227.20165	9.13; 30.74; 58.92; 15.95; 61.64; 21.51; 8.98; 15.50; 10.02; 9.79; 11.27; 8.70; 8.40; 10.80; 18.17; 20.65; 12.89; 12.58; 37.81; 32.43; 26.02; 25.25; 20.20; 18.73; 17.15; 7.97; 9.76; 31.03; 10.88; 20.65; 100.00
27	163.07645	164.0837296	C10H12O2	CC(C1=CC=CC=C1)OC(=O)C	59.01385; 103.05532	100.00; 8.17	59.01385; 77.03967; 103.05532	100.00; 18.73; 23.21	41.00329; 59.01385	100.00; 82.46
28	165.0921	166.0993797	C10H14O2	CC1(C2CCC1(C(=O)C2=O)C)C	163.07645; 165.09210	0.30; 100.00	109.10227; 165.09210	20.11; 100.00	107.08662; 109.10227; 123.04515; 137.06080; 137.09719; 149.06080; 165.09210	100.00; 27.54; 16.14; 48.26; 22.00; 15.86; 69.13
29	453.27588	454.2831577	C27H38N2O4	CC(C)C(CCCN(C)CCC1=CC(=C(C=C1)OC)OC)(C#N)C2=CC(=C(C=C2)OC)OC	151.07645; 421.24967; 426.26498; 453.27588	3.90; 10.34; 9.05; 100.00	135.04515; 137.06080; 165.09210; 193.12340; 202.08735; 204.13939; 205.12340; 207.13905; 220.13430; 228.10300; 230.11865; 231.13905; 232.13430; 233.15470; 234.14995; 379.20272; 390.20747; 392.22312; 394.23877; 395.19763; 396.25442; 404.22312; 406.20238; 408.25442; 410.23368; 420.21803; 422.23368; 424.24933; 426.26498; 436.24933; 453.27588	15.49; 39.46; 13.92; 25.73; 16.61; 32.60; 21.61; 22.09; 43.49; 21.47; 16.92; 14.57; 14.65; 18.94; 18.16; 16.34; 100.00; 22.85; 41.91; 18.54; 45.41; 22.74; 76.57; 44.80; 23.20; 26.31; 73.35; 17.39; 31.62; 18.10; 14.74	41.00329; 55.01894; 71.01385; 93.03459; 123.04515; 149.06080; 152.10809; 163.07645; 165.09210; 178.08735; 273.16085; 273.19724; 301.19215; 325.19215; 355.20272; 363.20780; 365.18707; 367.20272; 367.23910; 379.20272; 379.23910; 380.22312; 381.25475; 383.23402; 393.21837; 395.19763; 396.25442; 407.23402; 409.21328; 421.21328; 437.24458	10.34; 9.30; 8.00; 12.35; 7.49; 10.11; 12.94; 21.00; 16.52; 8.24; 12.92; 21.14; 21.46; 35.98; 10.79; 9.39; 8.11; 100.00; 15.34; 13.93; 15.48; 7.58; 11.73; 11.90; 16.11; 42.12; 7.57; 7.63; 8.36; 10.15; 11.93
30	205.15979	206.1670653	C14H22O	CC(C)(C)CC(C)(C)C1=CC=CC=C1O	149.09719; 205.15979	0.28; 100.00	139.14922; 205.15979	4.18; 100.00	41.00329; 93.03459; 95.08662; 117.03459; 133.06589; 163.14922; 173.09719; 177.12849; 179.14414; 189.12849; 205.15979	17.75; 69.21; 52.46; 25.89; 23.08; 16.17; 36.29; 10.87; 21.61; 32.19; 100.00
31	115.08769	116.094963	C5H12N2O	CC(C)(C)NC(=O)N	41.99854; 115.08769	21.43; 100.00	41.99854; 115.08769	100.00; 16.42	41.99854; 72.08187	100.00; 2.24
32	337.3112	338.3184806	C22H42O2	CCCCCCCCC=CCCCCCCCCCCCC(=O)O	293.32137; 337.31120	3.55; 100.00	59.01385; 293.32137; 337.31120	16.33; 6.45; 100.00	41.00329; 43.01894; 44.99820; 55.01894; 57.03459; 59.01385; 65.03967; 68.99820; 71.01385; 79.01894; 81.03459; 83.05024; 95.05024; 97.06589; 109.06589; 135.11792; 149.13357; 219.21182; 233.22747; 235.24312; 237.25877; 247.24312; 249.25877; 251.20165; 251.27442; 263.23804; 265.21730; 279.23295; 293.24860; 319.30064; 337.31120	22.89; 12.78; 100.00; 7.74; 7.23; 87.93; 6.39; 6.56; 63.87; 5.75; 11.52; 6.42; 9.27; 5.81; 6.43; 5.43; 8.11; 6.35; 7.21; 5.43; 6.12; 5.66; 5.56; 6.66; 6.40; 5.53; 7.45; 11.05; 7.24; 31.65; 25.42
33	203.10775	204.1150297	C13H16O2	C1CCC(CC1)(C(=O)C2=CC=CC=C2)O	105.03459; 203.10775	3.93; 100.00	77.03967; 203.10775	15.66; 100.00	77.03967; 81.07097; 93.03459; 95.05024; 97.06589; 99.08154; 105.03459; 161.06080; 185.09719; 201.09210	100.00; 16.09; 36.28; 22.67; 38.27; 15.19; 14.80; 9.01; 22.56; 17.65
34	155.14414	156.1514153	C10H20O	CC1CCC(C(C1)O)C(C)C	137.13357; 155.14414	9.99; 100.00	137.13357; 155.14414	9.50; 100.00	67.05532; 111.08154; 121.10227; 123.08154; 135.11792; 137.13357; 139.11284; 153.12849; 155.14414	11.42; 8.77; 98.73; 14.80; 48.50; 54.98; 40.72; 17.31; 100.00
35	141.12849	142.1357652	C9H18O	CC1CC(CC(C1)(C)C)O	139.11284; 141.12849	4.27; 100.00	123.11792; 141.12849	17.88; 100.00	107.08662; 125.09719; 139.11284; 141.12849	22.42; 29.41; 27.25; 100.00
36	134.09752	135.1047994	C9H13N	CCC(C1=CC=CC=C1)N	117.07097; 134.09752	7.89; 100.00	77.03967; 104.05057; 106.06622; 134.09752	42.61; 26.08; 14.37; 100.00	49.00837; 56.05057; 63.02402; 65.03967; 77.03967; 78.03492; 83.08662; 91.05532; 132.08187	19.52; 14.64; 10.72; 24.45; 100.00; 9.18; 6.56; 6.79; 14.42
37	382.12961	383.1368874	C21H21NO6	CN1CCC2=CC3=C(C=C2C1C4C5=C(C(=C(C=C5)OC)OC)C(=O)O4)OCO3	190.08735; 382.12961	3.27; 100.00	137.06080; 174.05605; 178.08735; 188.07170; 190.08735; 193.05063; 326.10340; 336.08775; 338.10340; 338.13978; 350.10340; 352.11905; 354.13470; 366.09831; 380.11396; 0.00025649); 382.12961	4.34; 4.16; 6.34; 40.43; 18.00; 8.65; 4.08; 6.70; 12.05; 9.99; 13.48; 13.12; 8.44; 25.40; 6.20; ; 100.00	99.00877; 137.06080; 147.04515; 149.02442; 160.07679; 172.04040; 174.05605; 188.07170; 190.08735; 292.06153; 294.07718; 296.09283; 310.10848; 320.05645; 320.09283; 336.08775; 338.10340; 338.13978; 350.06701; 350.10340; 352.11905; 353.10306; 364.08266; 366.09831; 378.09831; 380.11396	44.56; 13.71; 7.98; 9.13; 28.39; 12.86; 30.55; 100.00; 31.75; 8.90; 12.52; 7.97; 12.59; 12.15; 7.16; 34.02; 27.23; 7.71; 21.92; 32.92; 8.23; 7.21; 14.77; 35.56; 17.39; 46.42
38	422.1205	423.1277793	C18H21N3O9	C=CC(=O)OCCN1C(=O)N(C(=O)N(C1=O)CCOC(=O)C=C)CCOC(=O)C=C	68.99820; 71.01385; 280.09389; 352.11502; 422.12050	68.78; 68.40; 81.21; 26.33; 100.00	53.00329; 68.99820; 71.01385; 73.02950; 252.06259; 268.05751; 280.09389; 296.08881; 324.08372	11.20; 11.08; 100.00; 6.78; 11.23; 7.10; 22.76; 21.86; 7.18	41.00329; 43.01894; 53.00329; 55.01894; 68.99820; 71.01385; 197.05678; 238.04694; 240.06259; 252.06259; 254.07824; 264.06259; 266.07824; 268.05751; 270.07316; 280.09389; 281.07791; 282.07316; 294.07316; 296.08881; 308.08881; 324.08372; 334.06807; 368.10994; 394.12559	12.50; 13.02; 13.68; 11.73; 13.05; 100.00; 12.90; 24.93; 14.29; 84.63; 19.73; 16.23; 73.68; 22.08; 14.06; 17.23; 19.06; 15.55; 12.48; 22.79; 14.54; 30.07; 12.91; 18.33; 39.41
39	183.97263	184.9799046	C8H5Cl2N	C1=CC(=C(C=C1Cl)Cl)CC#N	123.99595; 183.97263	0.73; 100.00	123.99595; 183.97263	2.68; 100.00	34.96940; 64.01927; 183.97263	42.75; 52.19; 100.00
40	555.41673	556.4240083	C34H56N2O4	CCC(=O)OC1C(CC2C1(CCC3C2CCC4C3(CC(C(C4)OC(=O)C)N5CCCCC5)C)C)N6CCCCC6	59.01385; 555.41673	56.56; 100.00	55.01894; 59.01385; 73.02950	23.65; 94.84; 100.00	41.00329; 55.01894; 59.01385; 68.99820; 71.01385; 73.02950; 386.30645; 388.28572; 396.29080; 439.36939; 441.38504; 460.34323; 467.36430; 469.37995; 481.37995; 483.35922; 483.39560; 499.39052; 527.38543; 539.38543; 555.41673	55.83; 14.37; 100.00; 8.47; 10.39; 15.03; 5.06; 6.60; 9.29; 12.25; 9.05; 6.11; 19.79; 5.97; 17.89; 5.56; 62.22; 7.92; 6.56; 5.08; 22.91
41	265.18092	266.1881947	C16H26O3	CCCCCCCCCC=CCC1CC(=O)OC1=O	247.17035; 265.18092	5.44; 100.00	41.00329; 59.01385; 96.99312; 167.18052; 205.15979; 219.17544; 221.19109; 237.18600; 247.17035; 265.18092	6.62; 8.87; 6.38; 5.68; 8.09; 5.99; 33.89; 10.75; 10.69; 100.00	41.00329; 44.99820; 59.01385; 65.03967; 69.03459; 71.01385; 97.02950; 107.08662; 113.02442; 121.10227; 123.00877; 123.04515; 123.11792; 125.06080; 127.07645; 133.10227; 135.11792; 137.02442; 139.14922; 141.16487; 149.13357; 155.07137; 159.10267; 163.14922; 193.19617; 219.17544; 221.19109; 223.17035; 237.18600; 247.17035; 265.18092	100.00; 8.57; 27.79; 23.50; 6.91; 25.93; 8.22; 11.94; 14.07; 8.94; 6.67; 10.45; 10.42; 8.57; 7.09; 7.25; 12.22; 33.95; 8.74; 7.59; 7.21; 6.69; 7.88; 8.84; 10.94; 12.05; 40.19; 16.03; 22.53; 24.30; 9.05
42	122.97738	123.9846556	C4H6Cl2	C(C=CCCl)Cl	34.96940; 122.97738	100.00; 46.33	34.96940; 122.97738	100.00; 0.27	34.96940; 72.98505	100.00; 0.15
43	242.86618	243.87345	C4H6Br2O2	C(C(=C(CO)Br)Br)O	78.91889; 212.85561	100.00; 9.90	78.91889; 212.85561	100.00; 2.19	78.91889; 240.85053	100.00; 0.36
44	171.06628	172.0735589	C8H12O4	CCOC(=O)C=CC(=O)OCC	45.03459; 69.03459; 83.01385; 85.02950; 87.04515; 125.02442; 153.05572; 171.06628	19.08; 11.97; 40.45; 30.47; 14.46; 12.69; 18.81; 100.00	45.03459; 53.00329; 55.01894; 68.99820; 69.03459; 71.01385; 83.01385; 85.02950; 96.99312; 99.00877; 99.04515; 125.02442	41.02; 77.05; 67.44; 53.50; 26.37; 69.40; 96.59; 43.00; 36.65; 100.00; 34.15; 78.44	43.01894; 45.03459; 53.00329; 55.01894; 68.99820; 69.03459; 71.01385; 83.05024; 85.06589; 99.04515; 127.04007	29.41; 79.49; 23.41; 27.58; 100.00; 23.03; 69.46; 18.26; 12.91; 14.39; 12.76
45	153.12849	154.1357652	C10H18O	CCCCCCCC=CC=O	111.11792; 153.12849	13.40; 100.00	107.08662; 111.11792; 119.08662; 121.10227; 125.13357; 135.11792; 153.12849	4.89; 6.45; 9.47; 100.00; 12.79; 8.28; 43.20	41.00329; 49.00837; 51.02402; 53.00329; 53.03967; 55.01894; 63.02402; 65.00329; 65.03967; 67.01894; 67.05532; 69.07097; 71.08662; 79.05532; 81.07097; 91.05532; 93.07097; 95.08662; 97.10227; 121.10227; 123.11792; 125.13357	39.29; 17.07; 31.75; 18.12; 40.94; 78.22; 45.67; 19.81; 100.00; 43.83; 94.46; 35.69; 19.69; 17.27; 17.78; 21.15; 32.28; 39.29; 20.07; 25.27; 17.89; 24.30
46	97.06589	98.07316494	C6H10O	CCCC=CC=O	79.05532; 97.06589	16.02; 100.00	41.00329; 79.05532; 97.06589	25.41; 100.00; 55.23	41.00329; 49.00837; 51.02402; 53.00329; 55.01894; 63.02402; 65.03967	71.78; 95.62; 29.29; 35.76; 99.51; 76.22; 100.00
47	189.0921	190.0993797	C12H14O2	CCC(=O)OCC=CC1=CC=CC=C1	73.02950; 115.05532	100.00; 82.70	73.02950; 103.05532; 115.05532	99.33; 59.21; 100.00	55.01894; 71.01385; 73.02950; 77.03967; 115.05532	100.00; 27.20; 62.23; 20.67; 20.62
48	131.05024	132.0575149	C9H8O	C1=CC=C(C=C1)C=CC=O	103.05532; 131.05024	100.00; 24.72	77.03967; 103.05532	7.75; 100.00	63.02402; 77.03967; 89.00329; 103.05532	12.03; 100.00; 19.17; 31.66
49	155.10775	156.1150297	C9H16O2	CCCCCC(C=CC=O)O	113.09719; 127.11284; 155.10775	100.00; 25.66; 34.13	41.00329; 53.00329; 55.01894; 57.03459; 69.03459; 71.05024; 97.06589; 99.08154; 105.07097; 109.10227; 113.09719; 119.08662; 123.08154; 127.11284; 137.09719; 155.10775	49.26; 21.21; 36.78; 24.41; 20.62; 44.58; 26.73; 18.87; 50.04; 33.43; 38.23; 50.66; 100.00; 63.47; 42.60; 60.37	41.00329; 43.01894; 53.00329; 55.01894; 57.03459; 59.05024; 65.03967; 67.01894; 67.05532; 69.03459; 71.05024; 79.01894; 81.03459; 83.05024; 93.03459; 95.05024; 97.06589; 99.08154; 107.05024; 119.08662; 121.06589; 123.08154	24.96; 31.65; 12.56; 100.00; 54.34; 10.74; 11.06; 26.03; 13.88; 27.39; 48.22; 11.14; 18.63; 25.19; 11.39; 19.09; 36.03; 30.53; 9.67; 31.94; 10.27; 11.81
50	95.05024	96.05751487	C6H8O	CC=CC=CC=O	53.03967; 95.05024	23.14; 100.00	41.00329; 51.02402; 67.05532; 75.02402; 77.03967; 95.05024	78.01; 30.19; 42.72; 59.72; 100.00; 56.96	41.00329; 49.00837; 51.02402; 63.02402; 65.03967; 67.05532	23.10; 30.69; 100.00; 39.75; 29.34; 54.00
51	97.06589	98.07316494	C6H10O	CC=CC=CCO	53.03967; 97.06589	24.93; 100.00	43.01894; 53.03967; 71.05024; 77.03967; 79.05532	24.05; 18.54; 16.96; 20.84; 100.00	39.02402; 41.00329; 43.01894; 49.00837; 51.02402; 53.03967; 65.03967; 67.05532; 71.05024	20.99; 15.41; 60.34; 32.33; 57.44; 100.00; 29.37; 32.10; 19.52
52	211.17035	212.17763	C13H24O2	CCC=CCCC=CC(OCC)OCC	119.08662; 121.10227; 165.12849; 211.17035	28.75; 25.92; 56.29; 100.00	43.01894; 45.03459; 107.08662; 109.10227; 121.10227; 137.09719; 165.12849; 183.13905; 211.17035	43.73; 100.00; 14.12; 15.06; 32.04; 25.22; 37.06; 21.78; 48.10	43.01894; 45.03459; 51.02402; 55.05532; 67.05532; 69.03459; 71.05024; 73.02950; 81.07097; 83.05024; 85.06589; 87.04515; 97.06589; 99.04515; 101.06080; 107.08662; 109.10227; 111.08154; 121.10227; 127.07645; 129.09210; 131.10775; 137.09719; 139.11284; 153.09210; 165.12849; 167.14414; 181.12340; 183.13905; 195.13905	26.61; 100.00; 26.76; 9.55; 12.22; 20.06; 13.24; 10.47; 8.06; 19.57; 19.78; 39.77; 47.00; 29.55; 31.57; 9.93; 10.36; 9.10; 22.74; 25.57; 33.57; 11.37; 42.03; 39.62; 21.27; 12.68; 7.74; 9.18; 12.62; 9.28
53	165.05572	166.0629942	C9H10O3	CC1=CC=CC=C1OCC(=O)O	121.06589; 165.05572	42.96; 100.00	59.01385; 165.05572	100.00; 24.36	65.03967; 91.05532; 105.03459	7.37; 100.00; 14.77
54	185.1547	186.1619799	C11H22O2	CCCCCCC(CCC)C(=O)O	141.16487; 185.15470	2.75; 100.00	57.07097; 139.14922; 141.16487; 185.15470	8.33; 8.76; 26.29; 100.00	44.99820; 53.03967; 55.05532; 57.07097; 67.05532; 69.07097; 71.08662; 81.03459; 83.08662; 85.10227; 95.08662; 97.10227; 99.11792; 111.11792; 113.13357; 125.13357; 129.09210; 137.13357; 139.14922; 141.16487; 167.14414; 169.12340; 185.15470	100.00; 18.58; 21.17; 46.63; 31.97; 11.27; 49.01; 22.28; 27.22; 37.88; 17.24; 17.32; 57.09; 56.99; 23.01; 33.10; 11.88; 13.18; 16.83; 56.76; 10.54; 10.71; 11.48
55	180.96347	181.970751	C4H6O4S2	C(C(C(=O)O)S)(C(=O)O)S	102.98592; 146.97575; 180.96347	75.43; 100.00; 54.19	102.98592; 112.98803; 134.95799; 136.97364; 146.97575; 180.96347	100.00; 43.80; 21.52; 29.39; 38.17; 15.89	32.98044; 44.99820; 74.99101; 88.97027; 90.96817; 90.98592; 134.95799; 162.95291; 180.96347	60.72; 40.22; 25.89; 100.00; 72.87; 68.34; 37.00; 26.31; 31.06
56	194.1034	195.1106726	C7H17NO5	CNCC(C(C(C(CO)O)O)O)O	59.01385; 71.01385; 72.04549; 89.02442; 104.07170; 114.05605; 116.07170; 132.06662; 194.10340	100.00; 31.01; 18.48; 30.70; 15.95; 23.39; 13.01; 43.03; 81.65	43.01894; 59.01385; 61.02950; 71.01385; 72.04549; 74.06114; 86.06114; 89.02442; 102.05605	16.78; 100.00; 7.11; 13.61; 22.45; 8.66; 12.59; 10.06; 7.59	41.00329; 43.01894; 58.02984; 59.01385; 61.02950; 71.01385; 73.02950; 84.04549; 102.05605	25.19; 29.01; 10.04; 100.00; 22.55; 18.44; 15.90; 37.67; 10.02
57	153.12849	154.1357652	C10H18O	CC1CCC(C(=O)C1)C(C)C	135.11792; 153.12849	1.96; 100.00	135.11792; 153.12849	10.02; 100.00	41.00329; 43.05532; 55.05532; 57.07097; 67.05532; 79.05532; 83.05024; 85.06589; 93.03459; 95.05024; 97.06589; 109.06589; 109.10227; 111.08154; 119.08662; 121.06589; 135.11792; 137.09719; 151.11284; 153.12849	65.65; 34.24; 13.53; 22.24; 16.65; 16.14; 15.81; 14.06; 18.43; 21.41; 25.57; 63.50; 14.59; 14.81; 73.61; 66.95; 19.26; 69.16; 69.01; 100.00
58	302.24894	303.2562147	C20H33NO	CC1CN(CC(O1)C)CC(C)CC2=CC=C(C=C2)C(C)(C)C	114.09244; 302.24894	2.56; 100.00	147.11792; 159.11792; 175.14922; 187.14922; 302.24894	8.59; 10.09; 100.00; 6.81; 21.88	39.02402; 43.01894; 57.03459; 98.06114; 108.04549; 112.07679; 117.07097; 124.07679; 126.09244; 131.08662; 133.10227; 147.11792; 148.07679; 159.11792; 161.13357; 175.14922; 188.10809; 189.16487; 190.12374; 194.15504; 216.17577; 242.15504; 242.19142; 244.20707; 270.18634; 284.20199; 286.21764; 298.21764; 300.23329	11.95; 35.12; 11.72; 23.32; 24.22; 100.00; 17.39; 23.53; 10.03; 20.93; 14.53; 30.87; 9.12; 9.24; 17.39; 17.18; 9.57; 29.30; 10.36; 10.53; 26.22; 10.49; 29.59; 25.32; 8.41; 56.95; 33.41; 20.57; 58.83
59	300.06999	301.0772645	C16H15NO3S	COC1=CC=C(C=C1)C2C(C(=O)NC3=CC=CC=C3S2)O	268.04377; 300.06999	3.56; 100.00	41.99854; 107.05024; 118.02984; 124.02264; 147.04515; 150.00191; 151.02231; 152.01756; 176.01756; 180.01247; 192.01247; 268.04377; 270.05942; 282.05942; 300.06999	15.92; 18.30; 7.92; 8.03; 7.42; 30.83; 8.04; 4.67; 6.82; 29.09; 6.04; 22.88; 4.28; 10.20; 100.00	41.00329; 41.99854; 43.01894; 72.97536; 74.99101; 77.03967; 98.99101; 105.03459; 107.05024; 109.01174; 118.02984; 122.00699; 135.04515; 147.04515; 150.00191; 151.02231; 176.01756; 192.01247; 216.01247; 218.02812; 252.04886; 256.04377; 274.05434; 284.03869; 298.05434	7.75; 69.85; 23.23; 8.24; 26.04; 9.26; 12.00; 12.75; 8.19; 9.05; 25.68; 10.36; 9.48; 32.06; 67.26; 11.88; 20.95; 100.00; 10.45; 13.07; 14.23; 9.23; 9.93; 10.51; 37.68
60	264.06999	265.0772645	C13H15NO3S	CCC(C)C(C(=O)O)N1C(=O)C2=CC=CC=C2S1	150.00191; 220.08016	25.72; 100.00	150.00191; 220.08016	100.00; 2.34	44.99820; 109.01174; 150.00191; 164.01756	4.52; 15.48; 100.00; 7.71
61	275.98513	276.9924046	C8H8ClN3O4S	CON=C(C1=CSC(=N1)NC(=O)CCl)C(=O)O	199.96908; 231.99530; 275.98513	100.00; 99.54; 72.19	41.99854; 69.97569; 91.99086; 99.00224; 140.98611; 174.97384; 199.96908; 275.98513	19.92; 13.11; 15.33; 15.45; 11.20; 100.00; 21.12; 9.61	32.98044; 41.01452; 74.96432; 100.99120; 116.98611; 133.94729; 156.02371; 174.97384; 199.96908	5.22; 100.00; 5.57; 7.54; 38.36; 6.80; 4.45; 25.86; 5.05
62	80.05057	81.05784923	C5H7N	CCC=CC#N	78.03492; 80.05057	1.11; 100.00	78.03492; 80.05057	10.04; 100.00	40.01927; 49.00837; 51.02402; 52.01927; 64.01927	54.20; 60.37; 81.07; 78.25; 100.00
63	148.11317	149.1204495	C10H15N	CC(=CCCC(=CC#N)C)C	107.08662; 148.11317	26.14; 100.00	40.01927; 103.05532; 105.07097; 107.08662; 119.08662; 121.10227; 148.11317	15.58; 25.36; 12.23; 19.41; 22.97; 33.66; 100.00	40.01927; 63.02402; 64.01927; 65.03967; 66.03492; 79.05532; 81.07097; 89.03967; 92.05057; 103.05532; 105.07097; 106.06622	18.95; 15.11; 100.00; 16.36; 37.76; 14.40; 10.13; 8.69; 7.28; 13.87; 17.30; 8.21
64	125.07204	126.0793129	C6H10N2O	CC1=CC(=NN1CO)C	95.06147; 125.07204	100.00; 74.06	44.01419; 65.03967; 79.03017; 93.04582; 95.06147; 125.07204	34.88; 17.61; 20.63; 31.57; 100.00; 38.79	40.01927; 41.99854; 44.01419; 49.00837; 65.03967; 79.03017	26.00; 100.00; 86.22; 17.94; 20.33; 16.44
65	387.36324	388.3705162	C27H48O	CC(C)CCCC(C)C1CCC2C1(CCC3C2CCC4C3(CCC(C4)O)C)C	385.34759; 387.36324	5.91; 100.00	369.35268; 387.36324	10.17; 100.00	313.29007; 315.26934; 329.28499; 331.30064; 369.35268; 371.33194; 385.34759; 387.36324	4.66; 5.12; 8.23; 5.25; 22.55; 10.42; 6.80; 100.00
66	249.186	250.1932801	C16H26O2	CC1(CCCC2(C1CCC3(C2CC(=O)O3)C)C)C	207.17544	1.67	207.17544; 249.18600	6.06; 100.00	231.17544; 233.15470; 247.17035; 249.18600	11.36; 11.04; 11.94; 100.00
70	141.0921	142.0993797	C8H14O2	CCC=CCCOC(=O)C	59.01385; 141.09210	100.00; 83.56	41.00329; 59.01385	2.74; 100.00	41.00329; 43.01894; 45.03459; 59.01385; 65.03967; 69.03459; 71.05024	97.23; 48.61; 15.28; 100.00; 15.38; 28.21; 20.24
71	181.1234	182.1306798	C11H18O2	CCC=CCCOC(=O)C(=CC)C	97.06589; 99.04515; 99.08154; 181.12340	23.16; 64.33; 31.66; 100.00	55.05532; 81.03459; 99.04515; 99.08154	4.00; 11.10; 100.00; 5.04	44.99820; 49.00837; 51.02402; 53.03967; 55.05532; 65.03967; 67.05532; 71.01385; 97.06589; 99.04515; 99.08154	15.52; 19.78; 59.73; 15.26; 100.00; 10.17; 11.78; 31.50; 22.30; 40.86; 18.95
72	169.1234	170.1306798	C10H18O2	CCC=CCCOC(=O)C(C)C	99.08154; 169.12340	36.46; 100.00	71.01385; 87.04515	14.15; 100.00	43.01894; 43.05532; 45.03459; 51.02402; 55.01894; 65.03967; 67.05532; 69.03459; 71.01385; 71.05024; 85.02950; 87.04515; 97.06589; 99.08154	21.08; 28.35; 16.47; 16.16; 9.26; 19.77; 18.05; 27.02; 26.42; 25.49; 14.08; 100.00; 10.90; 10.08
73	203.10775	204.1150297	C13H16O2	CCC=CCCOC(=O)C1=CC=CC=C1	121.02950; 203.10775	31.80; 100.00	77.03967; 121.02950	100.00; 46.73	77.03967; 121.02950	100.00; 4.98
74	197.1547	198.1619799	C12H22O2	CCCCCC(=O)OCCC=CCC	97.06589; 197.15470	43.09; 100.00	59.01385; 97.06589; 115.07645; 197.15470	9.27; 100.00; 65.31; 16.79	41.00329; 43.01894; 44.99820; 51.02402; 53.00329; 57.03459; 59.01385; 65.03967; 67.05532; 69.07097; 73.02950; 79.05532; 81.07097; 97.06589; 99.08154; 115.07645	41.79; 16.75; 9.73; 10.59; 10.10; 9.96; 35.44; 55.32; 25.33; 11.18; 9.73; 27.96; 11.27; 100.00; 25.45; 25.59
75	155.10775	156.1150297	C9H16O2	CCC=CCCOC(=O)CC	73.02950; 99.08154; 155.10775	100.00; 53.57; 50.79	55.01894; 73.02950	31.93; 100.00	41.00329; 43.01894; 45.03459; 55.01894; 67.05532; 68.99820; 69.03459; 71.05024; 73.02950; 99.08154	27.89; 46.10; 25.51; 100.00; 24.22; 22.35; 45.61; 41.75; 77.77; 21.23
76	219.10267	220.1099444	C13H16O3	CCC=CCCOC(=O)C1=CC=CC=C1O	93.03459; 219.10267	68.57; 100.00	93.03459; 107.05024; 137.02442	100.00; 7.23; 16.36	43.01894; 63.02402; 65.00329; 67.01894; 77.03967; 91.01894; 93.03459; 95.05024; 119.01385; 121.02950	8.24; 5.33; 6.55; 4.19; 7.84; 6.19; 100.00; 3.40; 7.12; 3.41
77	137.0608	138.0680796	C8H10O2	COC1=CC=C(C=C1)CO	107.05024; 137.06080	48.50; 100.00	77.03967; 93.03459; 107.05024; 121.02950; 137.06080	23.41; 21.65; 69.65; 52.73; 100.00	41.00329; 65.00329; 67.01894; 92.99820; 93.03459; 121.02950	6.79; 5.27; 14.75; 6.17; 43.92; 100.00
78	193.08702	194.0942943	C11H14O3	CCOC(=O)COC1=CC=C(C=C1)C	59.01385; 91.05532; 105.03459; 107.05024; 165.05572; 193.08702	21.96; 11.69; 14.31; 100.00; 26.19; 49.00	41.00329; 59.01385; 75.00877; 91.05532; 107.05024; 121.06589	25.71; 100.00; 9.87; 35.57; 71.99; 12.78	41.00329; 45.03459; 53.00329; 59.01385; 65.03967; 91.05532; 105.03459; 107.05024	11.06; 5.56; 7.55; 24.01; 9.97; 21.05; 36.32; 100.00
79	189.10334	190.1106131	C11H14N2O	CC1C(NC(=O)N1C)C2=CC=CC=C2	41.99854; 77.03967; 132.04549; 189.10334	15.56; 14.45; 8.66; 100.00	41.99854; 77.03967; 91.05532; 104.05057; 106.06622; 117.07097; 189.10334	66.44; 43.75; 14.31; 24.65; 26.74; 15.46; 100.00	41.99854; 77.03967; 91.05532; 104.05057; 115.05532; 117.07097; 132.08187; 133.04074; 173.07204	100.00; 34.91; 8.32; 4.95; 5.39; 4.61; 5.08; 4.43; 5.87
80	175.08769	176.094963	C10H12N2O	CC1C(OC(=N1)N)C2=CC=CC=C2	158.06114; 175.08769	32.90; 100.00	41.01452; 41.99854; 59.02509; 77.03967; 91.05532; 105.03459; 115.05532; 133.06589; 158.06114; 175.08769	100.00; 25.88; 11.19; 33.83; 13.04; 14.60; 21.23; 21.53; 10.75; 56.72	41.01452; 41.99854; 42.03492; 55.01894; 65.01452; 77.03967; 105.03459; 131.05024	100.00; 21.18; 17.19; 12.94; 8.32; 44.92; 11.58; 8.80
81	232.09906	233.1063362	C10H16FNO4	CC(C)(C)OC(=O)N1CC(CC1C(=O)O)F	112.04040; 214.08850; 232.09906	15.05; 15.68; 100.00	18.99895; 112.04040	39.68; 100.00	18.99895; 41.99854; 44.99820; 57.03459; 59.03025; 60.02550; 61.04590; 69.99345; 72.00910; 73.06589; 86.02475; 86.04115; 103.02008; 104.01533; 105.03573; 112.04040; 114.03607; 128.01533; 130.03098; 132.04663	40.90; 6.11; 9.79; 33.48; 22.42; 7.51; 17.77; 6.29; 9.31; 29.15; 21.55; 5.25; 6.37; 17.42; 7.60; 27.34; 12.54; 10.42; 45.50; 100.00
82	216.99986	218.0071365	C8H10O3S2	CC1CC(C2=C(S1(=O)=O)SC=C2)O	153.03796; 216.99986	4.15; 100.00	64.97027; 82.99609; 159.01214; 198.98930; 216.99986	9.58; 9.59; 11.03; 8.56; 100.00	32.98044; 56.98044; 64.97027; 69.03459; 82.99609; 88.97027; 90.98592; 95.05024; 114.98592; 150.98930; 151.02231; 153.03796; 155.01722; 156.99649; 159.01214; 214.98421	14.93; 97.07; 80.60; 14.83; 81.61; 25.83; 15.25; 16.47; 31.43; 26.98; 14.81; 13.84; 12.83; 100.00; 57.98; 13.63
83	153.12849	154.1357652	C10H18O	CCCCCC=CCCC=O	125.13357; 153.12849	5.86; 100.00	43.01894; 71.05024; 107.08662; 109.10227; 111.11792; 121.10227; 125.13357; 135.11792; 153.12849	3.76; 2.78; 7.52; 2.81; 9.53; 31.32; 6.66; 14.65; 100.00	41.00329; 43.01894; 49.00837; 51.02402; 53.00329; 53.03967; 55.01894; 55.05532; 57.03459; 63.02402; 65.03967; 67.01894; 67.05532; 69.07097; 91.05532; 93.07097; 95.08662; 121.10227; 153.12849	85.04; 89.09; 12.18; 51.36; 32.04; 22.39; 61.34; 15.20; 29.93; 29.81; 100.00; 14.15; 67.46; 27.60; 12.49; 22.09; 17.24; 28.07; 10.63
84	160.06153	161.0688078	C6H11NO4	COC(=O)CCC(C(=O)O)N	84.04549; 112.04040; 128.03532; 142.05097; 160.06153	26.77; 14.32; 100.00; 58.15; 45.98	41.00329; 55.01894; 59.01385; 72.00910; 73.02950; 74.02475; 84.04549; 85.02950; 100.04040; 102.05605; 110.02475; 113.02442; 114.05605; 116.07170; 128.03532; 130.05097; 142.05097; 160.06153	23.88; 12.88; 15.42; 26.80; 18.64; 28.15; 58.14; 27.66; 14.95; 100.00; 13.79; 17.52; 13.18; 14.07; 34.41; 18.76; 13.44; 67.17	41.00329; 42.03492; 44.99820; 55.01894; 57.03459; 71.01385; 72.00910; 73.02950; 74.02475; 84.04549; 100.04040; 128.03532	100.00; 4.63; 11.21; 8.60; 6.32; 6.48; 7.51; 9.65; 14.93; 7.51; 8.05; 5.53
85	231.02183	232.0291072	C13H9ClO2	C1=CC=C(C=C1)C(=O)C2=C(C=CC(=C2)Cl)O	152.97488; 231.02183	2.13; 100.00	152.97488; 231.02183	7.69; 100.00	34.96940; 77.03967; 129.03459; 145.02950; 177.01127; 201.01127	74.99; 100.00; 13.15; 39.83; 26.25; 23.50
86	145.08702	146.0942943	C7H14O3	CCC1(COCOC1)CO	85.02950; 101.06080; 115.07645; 145.08702	30.26; 26.31; 76.06; 100.00	44.99820; 47.01385; 115.07645; 127.07645; 143.07137; 145.08702	100.00; 12.61; 13.97; 22.00; 13.88; 52.31	44.99820; 59.01385; 81.03459; 83.05024; 85.06589; 97.02950; 99.04515; 113.06080; 143.07137; 145.08702	100.00; 6.71; 7.15; 8.16; 10.60; 6.50; 9.40; 8.65; 5.72; 5.45
87	301.2173	302.2245802	C20H30O2	CCC=CCC=CCC=CCC=CCC=CCCCC(=O)O	257.22747; 301.21730	3.57; 100.00	59.01385; 73.02950; 123.11792; 135.11792; 141.09210; 153.09210; 167.10775; 181.12340; 189.16487; 199.14922; 203.18052; 205.19617; 221.15470; 233.15470; 247.17035; 255.21182; 257.22747; 283.20674; 299.20165; 301.21730	17.46; 0.99; 1.01; 2.70; 1.02; 1.43; 2.02; 0.99; 1.40; 1.73; 2.86; 1.34; 1.30; 1.04; 1.50; 1.34; 6.84; 5.07; 1.92; 100.00	41.00329; 43.01894; 44.99820; 59.01385; 65.03967; 67.05532; 71.01385; 89.03967; 107.08662; 119.08662; 121.10227; 123.08154; 127.05532; 129.07097; 131.08662; 135.11792; 159.11792; 161.13357; 171.11792; 173.13357; 185.13357; 187.14922; 229.12340; 243.13905; 247.17035; 257.15470; 271.17035; 283.20674; 285.18600; 299.20165; 301.21730	21.41; 8.78; 89.57; 100.00; 13.87; 10.03; 56.09; 12.19; 8.65; 9.17; 19.95; 8.64; 25.35; 10.32; 48.40; 12.36; 18.79; 10.73; 10.78; 23.84; 12.21; 10.98; 9.40; 11.47; 10.45; 12.37; 17.68; 28.00; 10.43; 13.59; 15.15
88	141.12849	142.1357652	C9H18O	CCC=CCCCCCO	111.11792; 141.12849	3.83; 100.00	109.10227; 111.11792; 123.11792; 141.12849	9.70; 28.63; 10.17; 100.00	41.00329; 41.03967; 43.01894; 51.02402; 53.03967; 55.01894; 57.03459; 57.07097; 65.03967; 67.01894; 67.05532; 69.03459; 69.07097; 71.08662; 93.07097; 121.10227; 123.11792; 141.12849	13.67; 13.30; 100.00; 40.32; 14.44; 97.40; 13.51; 10.11; 32.03; 13.78; 33.25; 13.88; 13.54; 10.37; 11.52; 11.91; 13.81; 10.83
89	265.2173	266.2245802	C17H30O2	CCOC(=O)C=C(C)C=CCC(C)CCCC(C)C	87.04515; 129.09210; 219.17544; 265.21730	3.32; 4.97; 14.81; 100.00	65.00329; 69.03459; 85.02950; 87.04515; 91.01894; 93.03459; 109.10227; 139.14922; 141.16487; 177.16487; 179.18052; 181.19617; 187.14922; 191.18052; 193.19617; 219.17544; 221.19109; 237.18600; 247.20674; 265.21730	3.45; 4.87; 7.76; 4.44; 3.21; 6.79; 3.48; 4.00; 4.78; 6.40; 24.86; 16.60; 10.03; 11.55; 28.64; 100.00; 38.42; 5.57; 4.19; 26.50	41.00329; 67.01894; 69.03459; 79.05532; 109.10227; 119.08662; 121.10227; 123.04515; 123.11792; 125.06080; 125.13357; 127.14922; 135.08154; 137.09719; 139.11284; 147.11792; 149.13357; 163.11284; 177.16487; 179.18052; 181.19617; 189.16487; 191.18052; 193.19617; 201.16487; 203.18052; 205.15979; 219.17544; 221.19109; 237.18600; 247.20674	32.94; 34.91; 31.49; 31.81; 47.99; 44.33; 49.79; 44.54; 100.00; 79.68; 51.01; 36.23; 40.76; 55.24; 38.61; 34.61; 50.94; 39.35; 69.50; 41.40; 34.75; 38.14; 35.42; 94.51; 49.69; 40.85; 65.02; 57.07; 88.86; 36.30; 62.32
90	368.31702	369.3242942	C22H43NO3	CCCCCCCCC=CCCCCCCCC(=O)N(CCO)CCO	324.29080; 368.31702	13.03; 100.00	86.06114; 100.04040; 102.05605; 104.07170; 112.04040; 114.05605; 130.05097; 144.06662; 263.23804; 265.25369; 292.26459; 294.28024; 306.28024; 320.29589; 322.27515; 324.29080; 336.29080; 338.30645; 350.30645; 368.31702	7.45; 4.17; 12.65; 14.79; 5.72; 5.41; 5.03; 5.38; 37.65; 6.10; 4.05; 5.45; 17.18; 4.74; 6.38; 38.79; 6.69; 15.53; 6.61; 100.00	41.00329; 43.01894; 45.03459; 53.00329; 55.01894; 57.03459; 58.02984; 60.04549; 70.02984; 72.04549; 74.06114; 86.06114; 88.04040; 88.07679; 100.04040; 102.05605; 104.07170; 114.05605; 127.11284; 181.15979; 195.17544; 209.19109; 263.23804; 265.25369; 267.26934; 269.28499; 306.28024; 308.29589; 322.27515; 340.32210; 350.30645	44.33; 100.00; 5.14; 5.44; 11.15; 15.27; 96.76; 96.27; 6.79; 10.78; 25.52; 8.86; 6.31; 5.61; 6.60; 4.90; 28.87; 5.58; 5.89; 9.03; 5.01; 8.89; 24.82; 25.27; 6.25; 6.48; 23.58; 12.25; 8.16; 5.87; 10.12
91	280.26459	281.2718647	C18H35NO	CCCCCCCCC=CCCCCCCCC(=O)N	41.99854; 280.26459	7.92; 100.00	41.99854; 280.26459	100.00; 44.47	41.99854; 44.01419	100.00; 2.50
92	297.24352	298.2507949	C18H34O3	CCCCCCC(CC=CCCCCCCCC(=O)O)O	279.23295; 297.24352	6.99; 100.00	59.01385; 111.11792; 113.09719; 129.12849; 141.12849; 143.14414; 153.09210; 157.12340; 181.12340; 183.13905; 195.13905; 207.17544; 211.13397; 213.14962; 235.24312; 253.25369; 261.22239; 279.23295; 295.22787; 297.24352	7.65; 1.77; 3.14; 2.72; 2.04; 1.66; 2.58; 5.61; 2.71; 4.88; 1.80; 2.42; 10.65; 3.23; 4.12; 3.94; 1.84; 30.66; 2.37; 100.00	41.00329; 43.01894; 44.99820; 55.01894; 57.03459; 59.01385; 59.05024; 71.01385; 81.03459; 83.05024; 85.06589; 95.05024; 97.10227; 99.08154; 113.09719; 125.09719; 127.11284; 139.11284; 151.11284; 193.15979; 195.13905; 213.14962; 235.17035; 251.20165; 261.22239; 263.20165; 277.21730; 279.23295; 281.21222; 295.22787; 297.24352	13.24; 14.11; 100.00; 16.26; 14.81; 64.97; 31.67; 23.09; 11.97; 12.24; 11.02; 10.81; 10.32; 17.60; 17.52; 26.92; 12.75; 11.31; 10.79; 9.92; 12.29; 12.40; 18.54; 14.46; 17.29; 10.25; 12.35; 42.72; 13.02; 12.71; 14.60
93	325.18429	326.191566	C18H30O3S	CCCCCCCCCCCCC1=CC=C(C=C1)S(=O)(=O)O	297.15299; 325.18429	0.36; 100.00	80.96519; 325.18429	6.57; 100.00	63.02402; 80.96519; 91.05532; 156.99649; 159.01214; 171.01214; 183.01214; 185.02779; 225.05909; 227.07474; 245.12169; 255.10604; 267.10604; 281.12169; 283.13734; 297.15299; 323.16864; 325.18429	2.48; 100.00; 6.02; 13.12; 3.74; 42.09; 2.50; 3.48; 3.14; 3.49; 2.63; 2.51; 3.50; 2.76; 2.34; 4.56; 2.59; 13.93
94	94.94608	95.9533555	C2H2Cl2	C(=CCl)Cl	34.96940; 94.94608	100.00; 19.23	34.96940; 58.96940	100.00; 0.02	34.96940; 58.96940	100.00; 0.16
95	210.87635	211.88363	C4H6Br2	C(C=CCBr)Br	78.91889; 210.87635	85.19; 100.00	78.91889; 210.87635	100.00; 0.41	78.91889; 208.86070	100.00; 0.02
96	253.2173	254.2245802	C16H30O2	CCC=CCCCCCCCCCCOC(=O)C	59.01385; 253.21730	100.00; 27.22	59.01385; 253.21730	100.00; 8.31	41.00329; 59.01385	40.17; 100.00
97	99.08154	100.088815	C6H12O	CCCC=CCO	69.07097; 99.08154	6.38; 100.00	79.05532; 81.07097; 99.08154	17.15; 100.00; 73.34	39.02402; 41.00329; 43.01894; 51.02402; 55.01894; 65.03967; 67.05532; 69.03459	18.58; 19.49; 42.89; 68.07; 100.00; 24.25; 26.15; 22.42
98	139.11284	140.1201151	C9H16O	CCCCCCC=CC=O	97.10227; 139.11284	22.12; 100.00	105.07097; 107.08662; 111.11792; 121.10227; 139.11284	19.98; 100.00; 83.66; 26.22; 52.03	39.02402; 41.00329; 49.00837; 51.02402; 53.00329; 53.03967; 55.01894; 55.05532; 63.02402; 65.00329; 65.03967; 67.01894; 67.05532; 91.05532; 93.07097; 121.10227	22.46; 72.67; 42.45; 33.47; 24.90; 22.95; 27.76; 19.61; 39.96; 28.15; 100.00; 42.21; 64.63; 19.27; 16.38; 24.35
99	137.03565	138.0429274	C6H6N2O2	C1=C(NC=N1)C=CC(=O)O	93.04582; 137.03565	100.00; 12.72	67.03017; 93.04582	38.20; 100.00	40.01927; 64.01927; 66.03492; 67.03017; 91.03017	18.56; 15.50; 23.46; 100.00; 44.28
100	136.02837	137.0351024	C6H5N2O2-	C1=C(NC=N1)C=CC(=O)[O-]	93.04582; 137.03565	100.00; 17.33	67.03017; 93.04582	39.09; 100.00	40.01927; 64.01927; 66.03492; 67.03017; 93.04582	15.95; 16.63; 25.15; 100.00; 18.83
101	121.0295	122.0367794	C7H6O2	C1=COC(=C1)C=CC=O	93.03459; 121.02950	55.27; 100.00	67.01894; 75.02402; 93.03459	100.00; 7.95; 49.07	41.00329; 49.00837; 63.02402; 65.00329; 65.03967; 67.01894; 89.00329; 91.01894; 93.03459	32.97; 54.52; 81.24; 64.11; 48.48; 100.00; 45.16; 35.22; 31.39
102	100.0404	101.0476785	C4H7NO2	C(C=CC(=O)O)N	56.05057; 100.04040	7.40; 100.00	56.05057; 82.02984; 83.01385; 98.02475; 100.04040	17.11; 19.20; 8.68; 14.84; 100.00	39.02402; 50.00362; 52.01927; 54.03492; 64.01927	17.08; 13.37; 22.12; 15.86; 100.00
103	239.20165	240.2089301	C15H28O2	CCCCCCCCC=CCCCOC(=O)C	59.01385; 239.20165	100.00; 27.25	59.01385; 239.20165	100.00; 8.23	41.00329; 59.01385	40.14; 100.00
104	155.14414	156.1514153	C10H20O	CCCCC=CCCCCO	125.13357; 155.14414	2.72; 100.00	125.13357; 137.13357; 155.14414	6.21; 4.39; 100.00	41.03967; 43.01894; 45.03459; 51.02402; 53.00329; 53.03967; 55.01894; 55.05532; 57.03459; 59.05024; 65.03967; 67.01894; 67.05532; 69.03459; 69.07097; 81.07097; 93.07097; 95.08662; 97.06589; 97.10227; 121.10227; 123.11792; 155.14414	12.87; 48.05; 13.63; 41.09; 11.27; 18.27; 100.00; 26.80; 30.63; 10.30; 42.75; 15.72; 32.51; 21.05; 33.73; 13.14; 15.23; 13.34; 9.25; 18.68; 10.62; 13.33; 24.35
105	147.08154	148.088815	C10H12O	CC=CC1=CC=C(C=C1)OC	121.06589; 147.08154	7.25; 100.00	115.05532; 131.05024; 147.08154	6.84; 17.94; 100.00	49.00837; 63.02402; 73.00837; 75.02402; 77.03967; 89.03967; 103.05532; 105.03459; 129.03459; 131.05024	7.70; 31.08; 11.40; 17.86; 9.80; 10.88; 9.29; 60.34; 31.53; 100.00
106	253.2173	254.2245802	C16H30O2	CCCCCCC=CCCCCCCCC(=O)O	209.22747; 253.21730	3.53; 100.00	59.01385; 209.22747; 253.21730	16.43; 6.34; 100.00	41.00329; 43.01894; 44.99820; 51.02402; 55.01894; 57.03459; 59.01385; 65.03967; 67.05532; 69.07097; 71.01385; 79.01894; 81.03459; 99.08154; 107.08662; 109.06589; 109.10227; 119.08662; 121.10227; 123.11792; 125.09719; 125.13357; 127.11284; 135.11792; 139.14922; 149.13357; 163.14922; 181.12340; 209.15470; 235.20674; 253.21730	19.23; 10.74; 100.00; 6.37; 6.50; 6.07; 87.94; 18.44; 10.28; 7.70; 52.60; 5.71; 9.68; 6.45; 7.96; 6.16; 6.52; 7.24; 9.62; 8.35; 12.12; 8.88; 6.83; 9.00; 7.51; 8.92; 9.80; 6.15; 5.97; 26.12; 18.81
107	409.38398	410.3912516	C30H50	CC(=CCCC(=CCCC(=CCCC=C(C)CCC=C(C)CCC=C(C)C)C)C)C	341.32137; 409.38398	1.35; 100.00	121.10227; 123.11792; 137.13357; 179.18052; 217.19617; 273.25877; 287.27442; 301.29007; 303.30572; 327.30572; 341.32137; 393.35268; 407.36833; 409.38398	4.30; 5.84; 7.33; 5.36; 4.02; 2.57; 3.34; 5.31; 2.41; 2.78; 5.15; 12.85; 9.62; 100.00	65.03967; 67.05532; 79.05532; 105.07097; 109.10227; 121.10227; 129.07097; 131.08662; 133.10227; 135.11792; 137.13357; 143.08662; 269.22747; 271.24312; 273.25877; 285.25877; 287.27442; 293.22747; 297.25877; 301.29007; 323.27442; 325.29007; 327.30572; 337.29007; 339.30572; 341.32137; 351.30572; 353.32137; 365.32137; 367.33702; 393.35268	23.15; 8.28; 11.96; 13.24; 16.36; 12.08; 7.68; 7.92; 9.60; 8.79; 21.53; 7.66; 27.67; 12.03; 50.98; 12.41; 13.73; 12.98; 13.20; 7.89; 12.94; 75.52; 28.88; 25.31; 21.64; 100.00; 9.52; 21.10; 10.19; 19.25; 34.62
108	151.11284	152.1201151	C10H16O	CCCCCC=CC=CC=O	107.08662; 151.11284	12.43; 100.00	41.00329; 51.02402; 53.03967; 67.05532; 69.03459; 93.07097; 105.07097; 107.08662; 117.07097; 119.08662; 121.10227; 123.11792; 133.10227; 151.11284	17.10; 9.71; 7.07; 15.19; 12.27; 9.36; 7.64; 9.65; 8.59; 100.00; 8.51; 19.65; 8.52; 41.74	41.00329; 49.00837; 51.02402; 53.03967; 55.01894; 63.02402; 65.00329; 65.03967; 67.01894; 67.05532; 81.07097; 89.03967; 91.05532; 93.07097; 95.08662; 107.08662; 123.11792	16.98; 13.09; 39.57; 19.26; 16.67; 34.43; 9.57; 96.05; 12.47; 100.00; 17.08; 27.22; 15.20; 29.96; 20.10; 13.01; 10.33
109	251.20165	252.2089301	C16H28O2	CC=CCC=CCCCCCCCCOC(=O)C	59.01385; 251.20165	100.00; 27.16	59.01385; 251.20165	100.00; 8.18	41.00329; 59.01385	39.95; 100.00
110	215.10507	216.1123444	C10H12N6	C(CN(CC#N)CC#N)N(CC#N)CC#N	94.04107; 215.10507	15.02; 100.00	67.03017; 77.01452; 79.03017; 92.02542; 94.04107; 122.07237; 170.04722; 215.10507	44.44; 54.03; 18.23; 33.15; 100.00; 12.86; 18.85; 62.01	40.01927; 53.01452; 67.03017; 77.01452; 79.03017; 92.02542; 94.04107; 120.05672; 133.05197	40.05; 19.55; 67.56; 51.55; 59.02; 62.47; 100.00; 19.50; 30.10
111	153.04919	154.0564695	C7H10N2S	CC1=CN=C(C(=N1)C)SC	107.06147; 153.04919	15.16; 100.00	40.01927; 46.99609; 71.99134; 107.06147; 153.04919	31.77; 51.15; 40.11; 100.00; 45.25	40.01927; 46.99609; 64.01927; 66.03492; 107.06147; 153.04919	90.30; 69.91; 100.00; 29.72; 72.30; 21.63
112	148.06287	149.0701452	C6H7N5	CNC1=NC=NC2=C1NC=N2	121.05197; 148.06287	1.28; 100.00	67.03017; 119.03632; 121.05197; 146.04722; 148.06287	32.55; 22.55; 22.76; 20.27; 100.00	41.01452; 65.01452; 66.00977; 67.03017; 79.03017; 80.02542; 105.02067; 117.02067; 121.05197; 132.03157	100.00; 37.66; 37.43; 27.17; 17.47; 13.51; 18.50; 35.27; 16.06; 15.38
113	417.16251	418.1697817	C26H27O3P	CC1=CC(=C(C(=C1)C)C(=O)P(=O)(C2=CC=CC=C2)C(=O)C3=C(C=C(C=C3C)C)C)C	271.08934; 417.16250	100.00; 74.92	145.06589; 417.16250	100.00; 97.84	145.06589; 271.08934	97.75; 100.00
114	324.23329	325.2405646	C22H31NO	CC1=CC(=C(C=C1)O)C(CCN(C(C)C)C(C)C)C2=CC=CC=C2	107.05024; 324.23329	3.34; 100.00	77.03967; 84.08187; 91.05532; 98.09752; 103.05532; 105.03459; 105.07097; 107.05024; 115.05532; 117.07097; 124.11317; 126.12882; 128.14447; 172.11317; 174.12882; 195.08154; 197.09719; 211.11284; 216.17577; 218.19142; 223.11284; 225.12849; 230.19142; 256.17069; 258.18634; 280.17069; 282.18634; 308.20199; 322.21764; 324.23329	58.62; 17.51; 5.74; 7.89; 6.70; 15.66; 12.12; 37.43; 11.14; 21.86; 7.83; 12.60; 5.70; 6.32; 6.14; 11.61; 24.44; 13.16; 6.79; 10.01; 32.52; 9.28; 7.15; 8.80; 7.37; 6.50; 17.11; 11.20; 7.84; 100.00	56.05057; 77.03967; 84.08187; 91.05532; 103.05532; 105.07097; 107.05024; 109.06589; 111.08154; 112.11317; 113.09719; 117.07097; 119.05024; 120.08187; 131.05024; 133.06589; 135.08154; 168.08187; 170.09752; 172.11317; 174.12882; 176.14447; 197.09719; 200.14447; 202.12374; 202.16012; 204.13939; 211.11284; 238.12374; 266.15504; 324.23329	20.51; 57.23; 74.87; 31.90; 50.30; 25.97; 43.79; 16.55; 18.25; 33.35; 23.31; 14.70; 40.53; 26.90; 15.54; 53.84; 15.69; 76.43; 54.18; 64.50; 100.00; 18.73; 37.01; 29.19; 26.30; 23.06; 35.86; 15.19; 49.48; 72.53; 17.34
115	88.07679	89.08406397	C4H11NO	CCC(CO)N	58.02984; 88.07679	14.49; 100.00	56.05057; 58.02984; 58.06622; 70.06622; 86.06114; 88.07679	62.32; 69.33; 20.68; 16.61; 100.00; 53.91	40.01927; 58.02984	95.52; 100.00
116	135.11792	136.1252005	C10H16	CC1=CCC(C=C1)C(C)C	133.10227; 135.11792	0.35; 100.00	67.05532; 135.11792	6.12; 100.00	67.05532; 91.05532; 103.05532; 117.07097; 119.08662	100.00; 39.51; 22.21; 31.99; 50.82
117	407.2803	408.2875744	C24H40O5	CCCC1(CCC1)C(CC=CC2C(CC(=O)C2CCCCCCC(=O)OC)O)O	249.14962; 357.24352; 371.25917; 389.26973; 407.28030	65.71; 39.63; 62.10; 100.00; 29.87	41.00329; 73.02950; 237.14962; 247.17035; 249.14962; 249.18600; 261.14962; 261.18600; 263.16527; 263.20165; 265.18092; 281.17583; 293.17583; 295.19148; 317.24860; 331.26425; 333.24352; 335.25917; 337.27482; 339.29047; 357.24352; 359.25917; 361.27482; 365.26973; 371.25917; 375.25408; 377.26973; 379.28538; 389.26973; 405.26465; 407.28030	19.93; 5.62; 4.60; 6.29; 6.48; 9.52; 10.18; 4.37; 47.73; 6.96; 21.90; 4.86; 3.99; 6.65; 4.74; 11.79; 4.86; 9.41; 9.16; 3.76; 41.16; 17.93; 4.31; 6.97; 39.68; 9.28; 4.40; 5.40; 100.00; 6.55; 33.07	41.00329; 55.01894; 69.03459; 71.01385; 97.06589; 99.08154; 125.09719; 137.06080; 155.10775; 157.12340; 209.15470; 225.18600; 227.12888; 237.14962; 249.14962; 253.18092; 255.19657; 261.14962; 315.23295; 317.24860; 333.24352; 335.25917; 337.27482; 345.20713; 347.22278; 361.27482; 373.23843; 379.24900; 379.28538; 391.24900; 405.26465	64.58; 26.99; 35.30; 22.32; 34.74; 19.30; 24.82; 38.85; 22.92; 47.19; 28.08; 19.33; 26.90; 20.44; 33.01; 21.30; 23.67; 37.07; 23.07; 30.94; 27.02; 50.94; 21.49; 27.84; 30.28; 33.89; 31.20; 22.34; 25.80; 49.68; 100.00
118	270.1248	271.1320768	C15H17N3O2	C1CN2CCC1C(C2)NC(=O)C3=NC=C4C(=C3)C=CO4	118.02984; 270.12480	10.49; 100.00	41.99854; 44.01419; 118.02984; 120.04549; 125.10842; 145.04074; 146.02475; 151.08769; 226.09859; 240.11424; 242.12989; 270.12480	34.73; 11.31; 42.97; 7.08; 9.78; 10.15; 5.57; 12.90; 7.56; 5.77; 5.48; 100.00	41.00329; 41.99854; 67.01894; 68.01419; 78.03492; 94.02984; 104.05057; 108.08187; 118.02984; 119.06147; 120.00910; 120.04549; 122.06114; 123.09277; 125.10842; 144.00910; 145.04074; 146.02475; 161.07204; 175.08769; 226.09859; 252.11424; 254.09350; 268.10915	5.40; 58.45; 22.70; 10.75; 6.62; 7.21; 16.34; 6.95; 100.00; 6.23; 5.97; 12.14; 12.34; 9.16; 12.85; 8.76; 16.53; 17.82; 5.27; 5.93; 9.16; 5.65; 8.67; 54.00
119	199.05244	200.0597203	C8H9FN2O3	C1CC(OC1)N2C=C(C(=O)NC2=O)F	129.01058; 199.05244	5.31; 100.00	41.99854; 44.01419; 86.00477; 101.01566; 129.01058; 171.05753; 181.04188; 199.05244; 0.020562)	100.00; 11.40; 14.01; 30.43; 48.77; 9.57; 7.88; 27.55;	41.99854; 43.01894; 58.00985; 69.03459; 70.00985; 72.02550; 82.02984; 84.04549; 96.04549; 100.02042; 102.03607; 110.04115; 112.02042; 112.04040; 124.02042; 126.03607; 128.05172; 129.01058	100.00; 3.63; 10.59; 9.10; 4.30; 6.76; 4.04; 4.35; 4.68; 3.86; 3.57; 3.78; 3.48; 4.11; 9.17; 6.26; 4.81; 8.58
120	418.12155	419.1288213	C25H22ClNO3	CC(C)C(C1=CC=C(C=C1)Cl)C(=O)OC(C#N)C2=CC(=CC=C2)OC3=CC=CC=C3	169.00618; 193.04257; 197.06080; 208.07679; 209.03748; 324.07968; 418.12154; 0.0011206	19.66; 100.00; 14.64; 12.40; 56.56; 10.16; 87.91; 0.00061905)	34.96940; 93.03459; 150.99562; 153.01127; 165.04765; 167.06330; 169.00618; 169.06589; 191.02692; 193.04257; 208.07679; 209.03748; 222.05605; 418.12154	20.31; 29.30; 17.57; 14.65; 55.99; 23.32; 10.84; 30.07; 12.07; 21.86; 100.00; 54.74; 12.04; 45.97	34.96940; 93.03459; 111.00070; 125.01635; 130.02984; 146.02475; 148.04040; 150.99562; 165.04765; 169.06589; 193.00618; 206.06114; 208.07679; 222.05605; 224.07170; 392.10589; 402.09024	100.00; 86.59; 8.39; 11.95; 10.43; 68.07; 7.72; 12.24; 11.20; 13.81; 35.94; 6.75; 51.98; 25.64; 10.79; 11.08; 8.46
121	263.12888	264.1361591	C15H20O4	CC1=CC(=O)CC(C1(C=CC(=CC(=O)O)C)O)(C)C	153.09210; 219.13905	100.00; 33.57	137.06080; 151.07645; 153.09210; 201.12849; 219.13905	26.60; 16.91; 100.00; 43.86; 31.67	41.00329; 67.01894; 83.05024; 93.03459; 137.06080; 153.09210; 163.07645; 177.09210; 187.07645; 201.09210; 201.12849; 203.10775; 217.12340; 219.13905; 261.11323	4.28; 4.77; 3.72; 3.50; 11.58; 9.03; 4.05; 6.26; 8.40; 11.32; 18.03; 100.00; 6.30; 14.10; 3.82
122	155.14414	156.1514153	C10H20O	CC(CCC=C(C)C)CCO	137.13357; 155.14414	25.03; 100.00	109.10227; 123.11792; 125.13357; 137.13357; 155.14414	25.92; 100.00; 64.06; 66.82; 95.15	41.00329; 43.01894; 65.03967; 67.01894; 67.05532; 69.07097; 81.07097; 93.07097; 95.08662; 97.10227; 107.08662; 109.10227; 111.11792; 121.10227; 137.13357; 139.11284; 155.14414	8.52; 28.51; 100.00; 13.77; 17.58; 8.83; 30.00; 7.50; 10.56; 7.32; 11.05; 13.84; 10.47; 12.96; 11.48; 10.04; 9.35
123	102.09244	103.099714	C5H13NO	CC(CN(C)C)O	58.06622; 102.09244	14.80; 100.00	43.01894; 84.08187; 102.09244	18.72; 13.73; 100.00	42.03492; 43.01894; 44.05057; 45.03459; 57.03459; 58.06622; 68.05057	72.03; 80.83; 44.89; 32.58; 97.50; 32.03; 100.00
124	137.13357	138.1408506	C10H18	CC(CCC=C(C)C)C=C	111.11792; 137.13357	4.17; 100.00	107.08662; 137.13357	9.60; 100.00	51.02402; 63.02402; 65.03967; 67.05532; 69.07097; 79.05532; 91.05532; 93.07097; 95.08662; 119.08662; 121.10227	25.46; 57.28; 100.00; 70.20; 21.14; 58.68; 25.56; 40.07; 38.91; 22.35; 57.76
125	135.11792	136.1252005	C10H16	CC1=CCC(CC1)C(=C)C	133.10227; 135.11792	0.66; 100.00	107.08662; 135.11792	2.67; 100.00	53.03967; 65.03967; 67.05532; 91.05532; 93.07097; 95.08662; 109.10227; 119.08662; 133.10227; 135.11792	19.28; 57.97; 49.47; 56.57; 33.60; 26.59; 23.51; 74.03; 36.77; 100.00
126	217.09825	218.1055277	C12H14N2O2	CCC1(C(=O)N(C(=O)N1)C)C2=CC=CC=C2	139.05130; 217.09825	1.78; 100.00	41.99854; 56.01419; 77.03967; 104.05057; 111.02000; 132.04549; 161.07204; 173.03565; 174.09244; 189.06695; 217.09825	37.82; 39.66; 10.29; 12.06; 30.57; 9.66; 27.40; 32.26; 9.99; 100.00; 12.34	41.99854; 44.01419; 56.01419; 58.02984; 77.03967; 104.05057; 111.02000; 115.05532; 117.03459; 117.07097; 130.06622; 132.04549; 132.08187; 146.06114; 161.07204; 173.03565; 187.05130; 189.06695	100.00; 4.76; 13.97; 5.97; 39.49; 4.96; 70.15; 6.97; 23.36; 11.35; 5.90; 10.24; 7.02; 6.79; 11.61; 12.29; 4.43; 4.36
127	315.14964	316.1569118	C13H24N4O3S	CC(C)(C)NCC(COC1=NSN=C1N2CCOCC2)O	313.13399; 315.14964	5.04; 100.00	41.99854; 43.01894; 59.01385; 88.98151; 100.98151; 108.08187; 111.05639; 126.09244; 128.10809; 130.08735; 130.12374; 141.01281; 143.02846; 146.11865; 167.08260; 168.02371; 169.09825; 170.03936; 171.11390; 184.01862; 186.03427; 200.04992; 230.09687; 295.12342; 297.13907; 298.12309; 313.13399; 315.14964	21.56; 16.54; 7.27; 5.37; 5.23; 5.94; 10.09; 16.37; 10.18; 5.53; 4.23; 4.95; 10.51; 4.72; 4.85; 4.29; 7.79; 28.48; 9.07; 9.19; 74.02; 4.45; 6.04; 5.03; 7.98; 4.57; 33.28; 100.00	32.98044; 41.99854; 43.01894; 59.99134; 73.97061; 75.98626; 82.02984; 84.04549; 84.98659; 88.98151; 90.99716; 96.08187; 98.09752; 100.98151; 107.02509; 108.08187; 109.04074; 111.05639; 126.09244; 127.99241; 139.05130; 141.01281; 143.02846; 158.00297; 184.01862; 186.03427; 200.04992; 200.08631; 203.08597; 212.04992; 297.13907	9.11; 27.55; 29.32; 8.05; 100.00; 14.93; 19.44; 27.36; 8.31; 25.53; 9.32; 10.05; 9.42; 10.59; 21.97; 9.51; 10.89; 35.16; 10.08; 48.09; 11.73; 49.34; 38.96; 16.73; 19.02; 10.67; 8.62; 14.16; 11.23; 8.13; 15.87
128	237.22239	238.2296656	C16H30O	CCCCC=CCCCCCCCCCC=O	209.22747; 237.22239	5.14; 100.00	41.00329; 195.21182; 209.22747; 219.21182; 237.22239	2.90; 2.41; 3.43; 6.48; 100.00	41.00329; 43.01894; 51.02402; 53.00329; 55.01894; 57.03459; 65.03967; 67.01894; 67.05532; 69.07097; 71.08662; 79.05532; 93.07097; 95.08662; 107.08662; 109.10227; 111.11792; 119.08662; 121.10227; 123.11792; 125.13357; 127.11284; 127.14922; 135.11792; 139.14922; 141.12849; 149.13357; 163.14922; 181.15979; 193.15979; 237.22239	100.00; 65.41; 18.17; 20.62; 50.38; 28.80; 26.96; 38.79; 36.69; 14.15; 26.81; 13.38; 33.21; 16.37; 23.41; 19.39; 15.14; 20.05; 38.97; 23.62; 24.51; 12.91; 13.15; 32.02; 14.62; 13.21; 17.59; 18.52; 13.77; 14.61; 60.14
129	99.08154	100.088815	C6H12O	CCC=CCCO	69.07097; 99.08154	6.38; 100.00	81.07097; 99.08154	100.00; 75.00	41.03967; 43.01894; 45.03459; 51.02402; 55.01894; 65.03967; 67.01894; 67.05532; 69.03459	20.08; 68.01; 30.12; 100.00; 28.24; 32.23; 23.95; 36.64; 35.13
130	386.21255	387.2198292	C26H29NO2	CCC(=C(C1=CC=C(C=C1)O)C2=CC=C(C=C2)OCCN(C)C)C3=CC=CC=C3	315.13905; 386.21255	4.35; 100.00	117.07097; 119.08662; 287.10775; 297.12849; 299.10775; 313.12340; 315.13905; 341.15470; 356.16560; 358.18125; 360.19690; 386.21255	4.40; 3.70; 3.72; 3.68; 6.76; 6.81; 30.12; 5.22; 8.32; 7.89; 5.25; 100.00	117.07097; 197.06080; 219.08154; 221.09719; 223.11284; 235.07645; 237.09210; 283.11284; 285.12849; 287.10775; 289.12340; 297.12849; 299.10775; 299.14414; 311.10775; 313.12340; 315.13905; 319.17035; 325.12340; 327.13905; 343.17035; 360.19690	6.21; 6.40; 8.20; 15.86; 7.81; 14.58; 11.64; 16.32; 8.82; 32.22; 10.47; 12.34; 61.86; 11.51; 11.51; 53.18; 100.00; 7.63; 8.64; 17.17; 9.29; 11.35
131	127.11284	128.1201151	C8H16O	CCC=CCCCCO	97.10227; 127.11284	2.26; 100.00	95.08662; 97.10227; 109.10227; 127.11284	10.67; 6.56; 15.73; 100.00	41.00329; 43.01894; 51.02402; 53.03967; 55.01894; 55.05532; 57.03459; 65.03967; 67.01894; 67.05532; 69.03459; 69.07097	15.96; 38.27; 37.18; 21.07; 100.00; 11.26; 19.80; 15.88; 9.38; 36.94; 11.61; 9.00
132	266.28532	267.2926002	C18H37N	CCCCCCCCC=CCCCCCCCCN	264.26967; 266.28532	0.43; 100.00	264.26967; 266.28532	1.99; 100.00	42.03492; 54.03492; 65.03967; 66.03492; 68.05057; 71.08662; 110.09752; 121.10227; 124.11317; 125.13357; 128.14447; 135.11792; 139.14922; 142.16012; 152.14447; 166.16012; 168.17577; 180.17577; 182.19142; 193.19617; 194.19142; 196.20707; 208.20707; 209.22747; 210.22272; 212.23837; 221.22747; 222.22272; 236.23837; 264.26967; 266.28532	28.21; 11.72; 7.75; 16.63; 7.62; 11.56; 9.21; 6.70; 8.59; 17.12; 6.10; 6.52; 8.50; 7.21; 6.63; 10.22; 6.58; 9.98; 7.17; 7.82; 12.00; 9.26; 15.48; 6.28; 12.07; 7.09; 6.30; 11.32; 11.36; 19.76; 100.00
133	416.31702	417.3242942	C26H43NO3	CCCCCCCCC=CCCCCCCCC(=O)NCC1=CC(=C(C=C1)O)OC	41.99854; 44.01419; 254.24894; 280.26459; 416.31702	12.38; 8.88; 13.36; 100.00; 25.99	41.99854; 44.01419; 46.02984; 58.02984; 60.04549; 72.04549; 107.01385; 110.06114; 121.02950; 237.25877; 250.21764; 262.25402; 263.23804; 278.24894; 280.26459; 398.30645; 416.31702	87.86; 27.00; 2.88; 66.81; 3.06; 5.16; 4.64; 3.73; 3.19; 5.01; 3.38; 9.55; 10.01; 5.07; 100.00; 2.93; 18.86	41.99854; 44.01419; 58.02984; 60.04549; 68.01419; 72.04549; 93.03459; 107.01385; 109.02950; 110.06114; 114.09244; 121.02950; 135.04515; 136.04040; 138.05605; 140.10809; 142.12374; 148.04040; 178.05097; 180.06662; 196.17069; 198.18634; 210.18634; 222.18634; 224.20199; 238.21764; 252.23329; 263.23804; 280.26459; 398.30645; 416.31702	100.00; 25.85; 42.30; 5.42; 2.89; 4.28; 3.47; 11.07; 2.75; 3.66; 4.64; 6.78; 2.86; 6.06; 4.14; 4.07; 6.91; 2.67; 4.54; 4.91; 4.85; 3.22; 3.56; 3.14; 6.25; 3.08; 2.85; 6.02; 2.90; 3.54; 3.88
134	153.12849	154.1357652	C10H18O	CC(=CCCC(=CCO)C)C	135.11792; 153.12849	19.45; 100.00	107.08662; 121.10227; 123.11792; 135.11792; 153.12849	51.63; 84.62; 100.00; 48.99; 67.84	43.01894; 51.02402; 63.02402; 65.00329; 65.03967; 67.01894; 67.05532; 69.03459; 69.07097; 79.05532; 81.07097; 93.07097; 95.08662; 105.07097; 109.10227; 111.11792; 119.08662	40.01; 15.42; 91.13; 23.68; 100.00; 29.75; 39.79; 20.77; 14.44; 79.79; 22.60; 14.60; 56.13; 18.00; 27.16; 22.28; 20.69
135	267.13905	268.1463299	C18H20O2	CCC(=C(CC)C1=CC=C(C=C1)O)C2=CC=C(C=C2)O	135.08154; 267.13905	8.64; 100.00	131.05024; 133.06589; 209.06080; 211.07645; 237.09210; 239.10775; 267.13905	14.35; 32.33; 100.00; 26.97; 36.48; 52.18; 94.33	77.03967; 93.03459; 105.03459; 119.05024; 171.08154; 181.06589; 183.08154; 187.11284; 193.06589; 195.08154; 197.09719; 199.11284; 209.06080; 209.09719; 211.07645; 213.12849; 221.09719; 223.07645; 223.11284; 265.12340	15.77; 16.92; 17.74; 63.90; 51.73; 33.74; 25.72; 17.56; 25.22; 28.85; 39.68; 15.95; 22.68; 50.23; 28.27; 98.16; 18.87; 44.15; 33.36; 100.00
136	448.09328	449.1005556	C23H19ClF3NO3	CC1(C(C1C(=O)OC(C#N)C2=CC(=CC=C2)OC3=CC=CC=C3)C=C(C(F)(F)F)Cl)C	223.01430; 239.00922; 421.08238; 448.09328; 0.0033294	49.43; 16.08; 14.68; 100.00; 0.0016533	93.03459; 146.02475; 169.06589; 177.02881; 195.01939; 197.03504; 197.06080; 208.07679; 222.05605; 224.07170; 239.00922; 428.08705; 446.07763; 448.09328	32.54; 26.75; 12.91; 68.39; 100.00; 14.80; 14.57; 53.47; 12.06; 11.35; 13.38; 14.12; 11.41; 35.21	63.02402; 65.03967; 93.03459; 117.03459; 146.02475; 148.04040; 169.06589; 192.04549; 195.01939; 196.96227; 206.06114; 208.07679; 208.99865; 222.05605; 239.00922; 241.02487; 302.02011; 304.03576; 342.05141; 356.06706; 370.04633; 372.06198; 394.04633; 396.06198; 446.07763	6.84; 8.75; 100.00; 4.22; 17.61; 6.22; 10.99; 3.08; 4.65; 4.19; 8.98; 16.58; 3.98; 3.51; 5.15; 4.54; 9.69; 14.09; 13.19; 6.43; 5.29; 7.31; 5.64; 6.20; 3.41
137	151.11284	152.1201151	C10H16O	CC1=CCC(C1(C)C)CC=O	109.10227; 151.11284	45.62; 100.00	43.01894; 107.08662; 109.10227; 151.11284	20.59; 34.58; 63.08; 100.00	41.00329; 43.01894; 103.05532; 119.08662	70.59; 28.73; 21.53; 100.00
138	153.12849	154.1357652	C10H18O	CC1(C2CCC1(C(C2)O)C)C	135.11792; 153.12849	4.45; 100.00	135.11792; 153.12849	4.94; 100.00	151.11284; 153.12849	100.00; 85.61
139	184.03796	185.0452337	C9H6F3N	C1=CC(=CC(=C1)C(F)(F)F)CC#N	168.00666; 184.03796	0.02; 100.00	168.00666; 184.03796	0.34; 100.00	64.01927; 184.03796	4.38; 100.00
140	157.08702	158.0942943	C8H14O3	C=COCCOCCOC=C	43.01894; 59.01385; 87.04515; 113.06080; 157.08702	81.62; 29.75; 100.00; 19.74; 24.36	41.00329; 43.01894; 61.02950; 87.04515	22.73; 100.00; 19.14; 15.23	41.00329; 43.01894; 59.01385; 61.02950; 69.03459; 105.05572	50.56; 100.00; 76.46; 52.01; 15.91; 21.41
141	470.05132	471.0585984	C21H17F4NO3S2	CC1=C(C=CC(=C1)SCC2=C(N=C(S2)C3=CC(=C(C=C3)C(F)(F)F)F)C)OCC(=O)O	426.06149; 470.05132	5.34; 100.00	59.01385; 123.02739; 125.04304; 137.00666; 153.03796; 179.01722; 197.02779; 260.01626; 274.03191; 376.04470; 394.03528; 396.05093; 436.06360; 444.03567; 450.04509; 452.04076; 470.05132	7.36; 57.36; 5.86; 30.57; 18.05; 10.32; 43.05; 22.31; 5.97; 7.31; 11.91; 12.16; 32.11; 11.53; 13.95; 12.16; 100.00	41.00329; 123.02739; 125.04304; 131.01141; 137.00666; 139.04007; 151.01764; 153.03796; 163.01764; 163.96341; 179.01722; 197.02779; 260.01626; 301.97268; 306.00398; 468.03567	2.36; 100.00; 5.73; 5.92; 16.75; 2.67; 21.32; 9.98; 5.42; 2.30; 3.65; 4.05; 2.84; 5.67; 2.96; 2.51
142	169.1234	170.1306798	C10H18O2	C=COCC1CCC(CC1)CO	43.01894; 125.09719; 127.11284; 169.12340	44.99; 97.08; 21.41; 100.00	105.07097; 109.10227; 121.06589; 123.08154; 125.09719	100.00; 77.60; 23.96; 75.81; 34.27	41.00329; 43.01894; 91.05532; 93.07097; 95.08662; 105.07097; 109.06589; 111.08154; 113.09719; 121.06589; 123.08154; 125.09719; 141.09210	47.33; 63.51; 23.37; 40.46; 23.40; 19.62; 25.65; 45.12; 31.15; 42.39; 100.00; 31.45; 43.55
143	460.22059	461.2278689	C28H29F2N3O	C1CN(CCC1N2C3=CC=CC=C3NC2=O)CCCC(C4=CC=C(C=C4)F)C5=CC=C(C=C5)F	440.21436; 460.22059	13.14; 100.00	41.99854; 95.03025; 203.06778; 415.19913; 417.21478; 430.17364; 432.22568; 434.20494; 440.21436; 442.21003; 460.22059; 0.055329)	5.62; 5.82; 5.08; 5.85; 11.62; 5.23; 4.98; 5.15; 7.87; 3.30; 100.00;	18.99895; 41.99854; 95.03025; 105.00944; 105.04582; 107.02509; 117.04582; 131.02509; 133.04074; 143.06147; 147.05639; 157.04074; 159.05639; 171.05639; 177.10334; 203.06778; 226.09859; 229.08343; 231.09908; 236.08294; 272.12563; 286.14128; 288.15693; 320.12563; 322.14128; 324.15693; 390.19871; 417.21478; 434.20494; 442.21003; 444.18929	7.56; 12.31; 3.00; 3.57; 44.05; 4.30; 4.52; 4.56; 100.00; 5.75; 3.34; 4.60; 3.15; 3.60; 2.86; 8.57; 2.96; 5.21; 2.74; 3.14; 20.29; 5.48; 5.83; 3.01; 2.79; 3.00; 6.59; 2.87; 10.10; 4.95; 9.21
144	201.04919	202.0564695	C11H10N2S	C1=CC=C2C(=C1)C=CC=C2NC(=S)N	142.06622; 201.04919	100.00; 45.99	57.97569; 142.06622	37.50; 100.00	57.97569; 142.06622	14.49; 100.00
145	319.00466	320.011933	C15H10Cl2N2O2	C1=CC=C2C(=C1)C(=NN2CC3=C(C=C(C=C3)Cl)Cl)C(=O)O	275.01483; 319.00466	100.00; 25.10	275.01483; 319.00466	100.00; 15.55	34.96940; 102.03492; 143.06147; 171.97263; 215.03815; 272.99918; 275.01483	58.44; 35.52; 15.41; 39.81; 22.93; 100.00; 65.08
146	154.03321	155.0404851	C7H9NOS	CC1=C(SC(=N1)C)C(=O)C	86.99101; 110.00699; 112.02264; 154.03321	12.89; 25.31; 100.00; 24.59	40.01927; 68.98044; 70.99609; 110.00699; 112.02264	96.68; 51.15; 94.82; 50.88; 100.00	40.01927; 68.98044; 70.99609; 86.99101; 94.99609; 112.02264	49.00; 11.90; 100.00; 15.49; 16.49; 17.62
147	205.15979	206.1670653	C14H22O	CCC(=O)C=CC1C(=CCCC1(C)C)C	123.11792; 205.15979	4.55; 100.00	55.01894; 71.05024; 121.10227; 123.11792; 135.11792; 137.13357; 145.10227; 147.11792; 149.13357; 151.14922; 205.15979	18.04; 13.43; 86.37; 56.00; 10.25; 9.95; 13.79; 15.04; 100.00; 11.66; 52.48	41.00329; 49.00837; 53.00329; 55.01894; 67.01894; 107.08662; 121.10227; 123.11792; 133.10227; 135.11792; 145.10227; 147.11792; 149.13357; 203.14414	55.49; 23.30; 60.17; 69.14; 66.12; 46.48; 24.61; 100.00; 24.85; 15.52; 30.77; 33.60; 24.58; 45.52
148	275.99884	277.0061193	C14H9Cl2NO	C1C2=CC=CC=C2N(C1=O)C3=C(C=CC=C3Cl)Cl	248.00393; 275.99884	0.45; 100.00	248.00393; 275.99884	3.86; 100.00	190.00652; 249.98319; 273.98319; 275.99884	34.01; 36.14; 19.42; 100.00
149	128.08294	129.090212	C5H11N3O	C1CN(C(=O)N1)CCN	110.07237; 128.08294	6.30; 100.00	41.99854; 42.03492; 44.01419; 57.04582; 70.02984; 83.02509; 85.04074; 99.05639; 110.07237; 111.05639; 128.08294	50.98; 31.12; 10.69; 12.88; 11.43; 22.50; 18.43; 10.92; 25.25; 39.83; 100.00	41.99854; 42.03492; 55.03017; 57.04582	100.00; 13.89; 12.98; 19.75
150	128.11932	129.1265975	C6H15N3	C1CN(CCN1)CCN	111.09277; 128.11932	6.88; 100.00	42.03492; 83.06147; 95.06147; 97.07712; 109.07712; 111.09277; 128.11932	22.23; 15.66; 13.61; 14.23; 25.51; 77.76; 100.00	40.01927; 42.03492; 57.04582; 70.06622; 83.06147; 85.07712; 95.06147; 111.09277	9.61; 100.00; 7.37; 7.76; 51.98; 17.14; 6.92; 7.11
151	132.05855	133.0658271	C6H12ClN	C1CCN(C1)CCCl	96.08187; 132.05855	65.94; 100.00	34.96940; 94.06622	100.00; 6.41	34.96940; 66.03492	100.00; 0.69
152	316.94639	317.953661	C14H10Cl4	C1=CC=C(C(=C1)C(C2=CC=C(C=C2)Cl)C(Cl)Cl)Cl	204.93841; 316.94638	0.69; 100.00	204.93841; 266.95406; 316.94638	56.56; 21.67; 100.00	82.94608; 111.00070; 204.93841; 220.99303; 256.96971; 266.95406; 316.94638	54.44; 100.00; 30.47; 47.73; 31.87; 35.89; 29.34
153	351.12696	352.134241	C21H21ClN2O	CCC(C)N(C)C(=O)C1=CC2=CC=CC=C2C(=N1)C3=CC=CC=C3Cl	34.96940; 238.04290; 321.08001; 323.09566; 351.12696	13.99; 100.00; 20.91; 14.32; 89.01	34.96940; 56.01419; 82.02984; 204.08187; 238.04290; 267.15029; 287.11899; 295.06436; 321.08001; 323.09566; 351.12696	40.61; 5.35; 6.70; 3.63; 100.00; 3.50; 7.68; 4.76; 4.89; 9.99; 7.38	34.96940; 56.01419; 56.05057; 58.02984; 70.06622; 78.03492; 80.05057; 82.02984; 84.04549; 152.05057; 154.06622; 158.06114; 180.04549; 183.05639; 185.07204; 209.07204; 211.08769; 213.04765; 236.02725; 237.10334; 238.04290; 263.11899; 264.02217; 266.03782; 267.15029; 275.11899; 279.06945; 287.11899; 301.13464; 335.09566; 349.11131	100.00; 10.97; 4.18; 52.66; 8.00; 7.21; 11.77; 6.14; 6.28; 12.55; 4.40; 4.98; 3.89; 7.09; 4.04; 9.34; 5.50; 11.63; 36.47; 4.37; 77.55; 4.79; 5.68; 4.82; 9.64; 11.33; 4.43; 6.17; 5.22; 8.04; 4.54
154	195.06945	196.0767261	C10H13ClN2	C1CN(CCN1)C2=CC=CC=C2Cl	34.96940; 195.06945	24.22; 100.00	34.96940; 195.06945	100.00; 26.69	34.96940; 126.01160; 152.02725	100.00; 23.28; 68.19
155	155.0826	156.0898776	C7H12N2O2	CCC(=CC)C(=O)NC(=O)N	41.99854; 112.07679; 155.08260	77.79; 61.29; 100.00	41.99854; 69.07097	100.00; 18.96	41.99854; 69.07097	100.00; 20.66
156	179.0826	180.0898776	C9H12N2O2	C1CN(CCN1)C(=O)C2=CC=CO2	67.01894; 179.08260	10.47; 100.00	49.00837; 67.01894; 109.04074; 111.05639; 123.05639; 125.07204; 179.08260	13.27; 100.00; 10.86; 63.24; 12.32; 12.99; 79.73	41.00329; 41.99854; 42.03492; 49.00837; 51.02402; 67.01894; 83.02509; 83.06147; 85.07712; 111.05639; 123.05639; 125.07204; 133.04074; 136.04040; 137.03565; 137.07204; 139.05130; 151.05130	12.56; 7.12; 16.94; 39.65; 10.95; 100.00; 18.61; 16.02; 11.80; 11.05; 15.70; 11.38; 8.82; 9.18; 15.45; 8.23; 12.35; 7.77
157	145.04074	146.0480128	C8H6N2O	C1=CC=C2C(=C1)C=NNC2=O	117.03459; 145.04074	1.66; 100.00	117.03459; 145.04074	5.25; 100.00	41.99854; 117.03459	100.00; 33.70
158	200.10809	201.1153641	C13H15NO	CC(=C)C1=CC(=CC=C1)C(C)(C)N=C=O	157.10227; 200.10809	81.87; 100.00	41.99854; 117.07097	100.00; 4.42	41.99854; 117.07097; 157.10227	100.00; 49.90; 60.92
159	322.18125	323.188529	C21H25NO2	CC(=O)OC1(CCN(CC1)CCC2=CC=CC=C2)C3=CC=CC=C3	262.16012; 322.18125	48.20; 100.00	59.01385; 77.03967; 91.05532; 202.12374; 244.13430; 260.14447; 262.16012; 278.15504; 280.17069; 322.18125	80.63; 14.42; 20.94; 10.90; 16.84; 31.37; 41.24; 11.56; 84.62; 100.00	41.00329; 42.03492; 59.01385; 77.03967; 91.05532; 118.06622; 138.05605; 140.07170; 142.08735; 144.08187; 146.09752; 158.09752; 160.11317; 174.09244; 176.10809; 200.10809; 202.12374; 226.12374; 228.10300; 242.11865; 244.13430; 278.15504; 280.17069; 296.16560; 306.14995; 320.16560; 322.18125	34.94; 9.95; 100.00; 23.83; 20.35; 7.20; 6.87; 26.34; 12.26; 13.52; 27.58; 26.67; 7.14; 9.04; 16.06; 17.05; 19.62; 5.37; 7.69; 5.44; 5.79; 8.48; 7.81; 9.29; 6.30; 19.60; 11.25
160	211.04886	212.0561327	C10H7F3N2	C1=CC=C(C(=C1)C(F)(F)F)N2C=CN=C2	185.03321; 211.04886	0.77; 100.00	184.03796; 211.04886	5.56; 100.00	67.03017; 117.04582; 140.03173; 160.03796; 184.03796; 185.03321; 211.04886	36.06; 25.21; 20.88; 49.36; 77.32; 57.74; 100.00
161	195.06945	196.0767261	C10H13ClN2	C1CN(CCN1)C2=CC(=CC=C2)Cl	34.96940; 195.06945	1.97; 100.00	34.96940; 126.01160; 195.06945	17.41; 7.27; 100.00	34.96940; 64.01927; 150.01160; 193.05380	100.00; 8.76; 8.89; 98.34
162	232.97931	233.986591	C7H7ClN2O3S	C1=CC(=CC=C1S(=O)(=O)NC(=O)N)Cl	189.97350; 232.97931	100.00; 93.24	77.96552; 189.97350	22.69; 100.00	34.96940; 41.99854	100.00; 10.22
163	221.07387	222.0811428	C13H15ClO	CC(C)(C)C(=O)C=CC1=CC=C(C=C1)Cl	137.01635; 221.07387	1.03; 100.00	34.96940; 221.07387	16.64; 100.00	34.96940; 69.03459; 77.00329; 111.00070; 135.00070; 162.99562	100.00; 39.22; 5.89; 6.95; 12.53; 6.68
164	223.08952	224.0967929	C13H17ClO	CC(C)(C)C(=O)CCC1=CC=C(C=C1)Cl	139.03200; 223.08952	2.05; 100.00	34.96940; 111.00070; 137.01635; 139.03200; 223.08952	22.11; 35.76; 14.24; 25.20; 100.00	34.96940; 53.00329; 55.01894; 67.01894; 69.03459; 71.05024; 109.06589; 111.00070; 125.01635; 135.00070; 197.07387; 223.08952	100.00; 4.04; 5.38; 5.20; 32.59; 10.86; 4.40; 56.31; 4.26; 18.87; 4.64; 4.65
165	240.09425	241.1015256	C14H12FN3	C1=CC=C2C(=C1)N=C(N2CC3=CC=C(C=C3)F)N	213.08335; 240.09425	0.27; 100.00	130.04107; 240.09425	17.02; 100.00	41.01452; 95.03025; 109.04590; 117.04582; 120.02550; 130.04107; 132.05672; 213.08335; 240.09425	10.14; 12.32; 11.62; 14.08; 12.48; 100.00; 12.08; 15.67; 14.65
166	216.08302	217.0902922	C13H12FNO	C1CC(CCC1=O)(C#N)C2=CC=C(C=C2)F	196.07679; 216.08302	13.22; 100.00	18.99895; 95.03025; 134.04115; 146.04115; 187.05647; 189.07212; 198.07245; 216.08302	18.16; 43.05; 7.14; 24.27; 34.54; 7.03; 12.37; 100.00	18.99895; 41.00329; 52.01927; 67.01894; 77.03967; 95.03025; 119.03025; 134.04115; 146.04115; 158.04115; 160.05680; 182.04115; 182.06114; 186.03607; 186.07245; 187.05647; 189.07212; 214.06737	22.98; 29.54; 10.79; 10.98; 11.85; 78.60; 10.15; 31.60; 11.03; 48.43; 27.48; 18.78; 10.71; 19.31; 11.52; 52.86; 11.31; 100.00
167	189.0921	190.0993797	C12H14O2	CCC(=O)C=CC1=CC=C(C=C1)OC	133.06589; 189.09210	20.55; 100.00	55.01894; 57.03459; 69.03459; 101.03967; 117.03459; 133.06589; 159.04515; 161.06080; 189.09210	28.30; 13.15; 18.49; 42.24; 100.00; 83.50; 13.96; 15.77; 64.44	41.00329; 49.00837; 51.02402; 53.00329; 57.03459; 63.02402; 65.03967; 67.01894; 91.05532; 93.03459; 95.05024; 103.05532; 105.03459; 115.01894; 117.03459; 119.05024; 133.06589; 145.02950	13.89; 5.09; 16.79; 5.43; 7.45; 24.03; 20.64; 9.50; 7.87; 8.96; 7.60; 6.67; 10.26; 19.53; 100.00; 17.62; 10.07; 17.56
168	309.14962	310.1568946	C20H22O3	CC(C)(C)C1=CC=C(C=C1)C(=O)CC(=O)C2=CC=C(C=C2)OC	175.11284; 309.14962	2.45; 100.00	41.00329; 107.05024; 133.10227; 161.09719; 175.04007; 175.11284; 201.09210; 279.13905; 309.14962	5.81; 14.82; 13.50; 10.33; 12.14; 10.69; 12.19; 9.12; 100.00	63.02402; 68.99820; 77.03967; 89.00329; 107.01385; 117.07097; 131.01385; 133.10227; 145.02950; 175.11284; 201.09210; 209.06080; 227.10775; 229.12340; 235.11284; 237.12849; 247.11284; 249.09210; 253.12340; 261.12849; 263.10775; 263.14414; 265.12340; 279.13905	67.52; 17.89; 43.81; 23.09; 32.61; 61.94; 50.87; 47.61; 67.35; 29.26; 33.01; 20.06; 100.00; 18.32; 33.90; 31.03; 79.30; 19.17; 49.22; 25.87; 28.47; 22.01; 58.90; 16.00
169	193.15979	194.1670653	C13H22O	CCC(=O)C1CC(CC=C1C)C(C)C	137.13357; 193.15979	9.26; 100.00	55.01894; 57.03459; 133.10227; 135.11792; 137.13357; 193.15979	30.29; 16.17; 27.31; 19.17; 36.16; 100.00	41.00329; 57.03459; 91.05532; 93.07097; 117.07097; 119.08662; 121.10227; 133.10227; 135.11792; 149.09719; 177.12849; 191.14414; 193.15979	16.11; 8.23; 7.76; 14.25; 23.69; 8.89; 7.77; 19.54; 6.11; 12.47; 4.65; 100.00; 7.13
170	287.13653	288.1438049	C17H18F2N2	C1CN(CCN1)C(C2=CC=C(C=C2)F)C3=CC=C(C=C3)F	267.13030; 287.13653	2.67; 100.00	95.03025; 191.09900; 203.06778; 216.06303; 232.09433; 287.13653	31.31; 6.46; 57.35; 5.01; 6.85; 100.00	83.06147; 95.03025; 109.04590; 119.03025; 121.04590; 133.04590; 145.04590; 177.05213; 189.08335; 191.09900; 203.06778; 216.06303; 218.07868; 232.09433; 234.10998; 261.12088	11.31; 66.81; 16.53; 14.58; 28.98; 19.98; 20.28; 11.04; 14.46; 14.96; 100.00; 45.43; 11.65; 12.50; 12.73; 27.67
171	260.99205	261.99933	C13H11BrO	C1=CC=C(C=C1)OC2=CC=CC(=C2)CBr	210.97640; 260.99205	0.19; 100.00	117.03459; 260.99205	3.04; 100.00	78.91889; 93.03459; 117.03459; 184.96075; 208.96075; 232.96075	24.09; 50.85; 41.29; 100.00; 25.72; 15.08
172	139.032	140.039278	C8H9Cl	CC1=CC=CC=C1CCl	103.05532; 139.03200	100.00; 83.35	34.96940; 103.05532	100.00; 1.33	34.96940; 103.05532	100.00; 1.35
173	157.06187	158.0691422	C6H10N2O3	CC1(C(=O)NC(=O)N1CO)C	41.99854; 127.05130; 157.06187	18.29; 19.58; 100.00	41.99854; 84.04549	100.00; 56.85	41.99854; 44.01419	100.00; 11.65
174	215.1839	216.1911721	C13H28S	CCCCCCCCCCCCSC	46.99609; 215.18390	92.76; 100.00	46.99609; 215.18390	100.00; 17.94	44.98044; 46.99609; 57.07097; 67.05532; 70.99609; 71.08662; 73.01174; 87.02739; 99.11792; 115.05869; 127.14922; 129.07434; 139.14922; 143.09000; 145.10565; 199.15260; 215.18390	10.46; 100.00; 5.20; 4.81; 4.68; 7.58; 4.20; 3.68; 3.37; 4.28; 5.58; 5.43; 3.38; 8.71; 4.62; 4.31; 37.83
175	190.10982	191.1170954	C9H13N5	CC1=CC=CC=C1N=C(N)N=C(N)N	41.01452; 83.03632; 104.05057; 106.06622; 146.07237	54.68; 100.00; 31.59; 53.28; 41.52	43.03017; 68.02542	100.00; 83.44	43.03017; 68.02542	97.23; 100.00
176	356.06951	357.0767857	C19H16ClNO4	CC1=C(C2=C(N1C(=O)C3=CC=C(C=C3)Cl)C=CC(=C2)OC)CC(=O)O	296.04838; 312.07968	28.34; 100.00	34.96940; 111.00070; 296.04838; 310.06403; 312.07968; 356.06951	18.72; 17.39; 72.74; 41.49; 100.00; 54.67	34.96940; 111.00070; 158.06114; 172.07679; 174.09244; 200.07170; 202.05097; 218.08227; 268.05347; 280.05347; 296.04838; 330.05386; 354.05386	100.00; 25.61; 76.25; 49.58; 52.21; 8.09; 43.94; 8.38; 7.00; 12.73; 34.27; 8.08; 11.76
177	109.0295	110.0367794	C6H6O2	C1=CC=C(C(=C1)O)O	81.03459; 109.02950	1.80; 100.00	53.03967; 109.02950	5.83; 100.00	41.00329; 65.00329	100.00; 28.35
178	291.22893	292.2362075	C14H32N2O4	CC(CN(CCN(CC(C)O)CC(C)O)CC(C)O)O	114.09244; 273.21837; 291.22893	11.71; 68.25; 100.00	43.01894; 45.03459; 57.03459; 59.05024; 215.17650; 229.19215; 233.18707; 273.21837; 275.19763; 291.22893	11.51; 12.23; 12.16; 11.64; 20.57; 10.66; 18.43; 27.29; 10.02; 100.00	43.01894; 45.03459; 57.03459; 84.04549; 86.06114; 88.07679; 102.09244; 128.10809; 130.08735; 132.10300; 144.10300; 158.11865; 160.13430; 173.12955; 213.16085; 215.17650	34.02; 11.96; 25.92; 24.01; 43.92; 23.10; 11.06; 19.16; 30.99; 11.39; 12.01; 100.00; 16.27; 20.34; 19.81; 10.64
179	340.68172	341.689	C2H2Br4	C(C(Br)(Br)Br)Br	78.91889; 340.68172	5.86; 100.00	78.91889; 340.68172	16.52; 100.00	78.91889; 340.68172	8.57; 100.00
180	164.88378	165.891061	C2H2Cl4	C(C(Cl)(Cl)Cl)Cl	34.96940; 164.88378	5.86; 100.00	34.96940; 164.88378	16.52; 100.00	34.96940; 164.88378	8.57; 100.00
183	174.94897	175.956248	C4H7Cl3O	CC(C)(C(Cl)(Cl)Cl)O	57.03459; 174.94897	0.29; 100.00	158.91767; 174.94897	3.84; 100.00	57.03459; 174.94897	6.56; 100.00
184	130.92276	131.930033	C2H3Cl3	CC(Cl)(Cl)Cl	94.94608; 130.92276	14.83; 100.00	34.96940; 130.92276	9.90; 100.00	34.96940; 130.92276	4.53; 100.00
185	158.91767	159.924948	C3H3Cl3O	CC(=O)C(Cl)(Cl)Cl	41.00329; 158.91767	0.05; 100.00	116.90711; 158.91767	3.95; 100.00	41.00329; 158.91767	33.65; 100.00
186	119.07137	120.0786442	C5H12O3	CC(OC)(OC)OC	57.03459; 87.04515	100.00; 24.68	55.01894; 57.03459	100.00; 90.85	55.01894; 57.03459	55.78; 100.00
187	621.24939	622.2566682	C38H38O8	C1C(O1)COC2=CC=C(C=C2)C(C3=CC=C(C=C3)OCC4CO4)C(C5=CC=C(C=C5)OCC6CO6)C7=CC=C(C=C7)OCC8CO8	565.22318; 593.25448; 621.24939	12.01; 4.86; 100.00	523.21261; 535.21261; 565.22318; 575.24391; 589.22318; 591.23883; 593.25448; 603.23883; 621.24939	11.62; 18.27; 10.10; 10.79; 14.81; 40.33; 31.40; 42.85; 100.00	253.08702; 255.10267; 507.18131; 509.19696; 521.19696; 523.21261; 533.19696; 535.21261; 549.22826; 577.22318; 589.22318; 605.21809; 619.23374; 621.24939	38.67; 19.37; 95.43; 27.63; 30.93; 32.99; 22.04; 100.00; 32.38; 14.54; 14.68; 14.48; 13.70; 20.58
188	340.68172	341.689	C2H2Br4	C(C(Br)Br)(Br)Br	78.91889; 340.68172	1.84; 100.00	78.91889; 340.68172	30.12; 100.00	78.91889; 340.68172	100.00; 56.61
189	164.88378	165.891061	C2H2Cl4	C(C(Cl)Cl)(Cl)Cl	128.90711; 164.88378	2.58; 100.00	34.96940; 164.88378	9.89; 100.00	34.96940; 164.88378	0.89; 100.00
191	130.92276	131.930033	C2H3Cl3	C(C(Cl)Cl)Cl	94.94608; 130.92276	12.39; 100.00	34.96940; 130.92276	100.00; 3.91	34.96940; 130.92276	83.82; 100.00
192	144.93841	145.945683	C3H5Cl3	CC(C(Cl)Cl)Cl	108.96173; 144.93841	6.68; 100.00	34.96940; 144.93841	100.00; 32.83	34.96940; 144.93841	100.00; 46.34
193	208.11317	209.1204495	C15H15N	CC1=NC2=C(C1(C)C)C3=CC=CC=C3C=C2	192.08187; 208.11317	2.91; 100.00	192.08187; 208.11317	14.10; 100.00	192.08187; 208.11317	100.00; 60.41
195	283.27549	284.2827638	C17H36N2O	CCCCN(CCCC)C(=O)N(CCCC)CCCC	128.14447; 283.27549	13.09; 100.00	126.12882; 128.14447; 283.27549	94.40; 100.00; 44.39	70.06622; 72.08187; 98.06114; 98.09752; 100.07679; 126.09244; 126.12882; 128.14447	27.89; 29.47; 65.12; 12.13; 100.00; 42.27; 12.36; 47.26
196	158.91767	159.924948	C3H3Cl3O	C(C(=O)C(Cl)Cl)Cl	74.96432; 158.91767	1.66; 100.00	74.96432; 158.91767	24.96; 100.00	74.96432; 158.91767	100.00; 84.83
197	117.04919	118.0564695	C4H10N2S	CNC(=S)N(C)C	32.98044; 117.04919	3.87; 100.00	32.98044; 71.99134	100.00; 89.01	57.97569; 71.99134	35.98; 100.00
198	172.18192	173.1891977	C9H23N3	CN(C)CCN(C)CCN(C)C	115.12407; 172.18192	7.56; 100.00	99.09277; 101.10842; 115.12407; 172.18192	13.85; 10.09; 25.60; 100.00	42.03492; 44.05057; 54.03492; 58.06622; 70.06622; 83.06147; 85.07712; 97.07712; 99.09277; 101.10842	57.38; 61.96; 46.64; 67.23; 100.00; 28.06; 56.84; 59.59; 97.62; 65.48
199	155.14414	156.1514153	C10H20O	CC(CCCC(C)(C)O)C=C	129.12849; 155.14414	0.64; 100.00	57.03459; 155.14414	16.05; 100.00	51.02402; 57.03459; 59.05024; 65.03967; 67.05532; 81.03459; 81.07097; 83.05024; 85.06589; 97.06589; 99.08154; 101.09719; 113.09719; 121.10227; 125.09719; 129.12849; 139.11284; 155.14414	18.44; 93.06; 56.38; 34.85; 28.66; 20.04; 48.38; 32.57; 25.60; 73.40; 35.82; 48.52; 23.12; 31.41; 33.75; 33.66; 27.76; 100.00
200	229.10227	230.1095504	C18H14	C1=CC=C(C=C1)C2=CC=C(C=C2)C3=CC=CC=C3	203.08662; 229.10227	0.14; 100.00	203.08662; 229.10227	2.64; 100.00	177.07097; 201.07097; 229.10227; 0	39.91; 53.03; 100.00; 229.1022739959
201	241.1234	242.1306798	C16H18O2	CC1=CC(=CC=C1)OCCOC2=CC=CC(=C2)C	107.05024; 241.12340	100.00; 86.10	107.05024; 133.06589; 241.12340	100.00; 7.10; 8.76	65.03967; 91.01894; 91.05532; 93.07097; 107.05024; 121.06589	20.07; 14.31; 53.54; 18.58; 100.00; 39.23
202	309.20713	310.2144094	C18H30O4	CC(=C)C(=O)OCCCCCCCCCCOC(=O)C(=C)C	85.02950; 309.20713	64.31; 100.00	41.03967; 85.02950	9.77; 100.00	39.02402; 41.03967; 85.02950; 143.14414; 171.13905	4.81; 100.00; 78.47; 3.00; 4.10
203	179.06147	180.0687483	C12H8N2	C1=CC2=C(C3=C(C=CC=N3)C=C2)N=C1	128.05057; 179.06147	0.05; 100.00	128.05057; 179.06147	0.59; 100.00	128.05057; 179.06147; 0	12.02; 100.00; 179.0614718039
204	179.14414	180.1514153	C12H20O	C1CCC(CC1)C2CCCCC2=O	83.08662; 179.14414	7.13; 100.00	161.13357; 179.14414	8.36; 100.00	41.00329; 79.05532; 81.07097; 83.08662; 93.07097; 95.05024; 121.06589; 123.08154; 123.11792; 137.13357; 151.11284; 153.12849; 161.13357; 177.12849; 179.14414	6.76; 14.65; 16.72; 46.58; 8.28; 5.59; 8.79; 6.61; 15.85; 11.77; 7.50; 6.74; 8.35; 100.00; 7.38
205	165.16487	166.1721507	C12H22	C1CCC(CC1)C2CCCCC2	163.14922; 165.16487	5.49; 100.00	163.14922; 165.16487	13.66; 100.00	81.07097; 83.08662; 109.10227; 123.11792; 163.14922; 165.16487	13.32; 21.48; 12.21; 15.01; 34.07; 100.00
206	237.16487	238.1721507	C18H22	CC1=C(C=C(C=C1)C(C)C2=CC(=C(C=C2)C)C)C	133.10227; 237.16487	11.55; 100.00	105.07097; 131.08662; 133.10227; 221.13357; 237.16487	17.49; 22.50; 45.65; 18.18; 100.00	91.05532; 105.07097; 115.05532; 117.07097; 127.05532; 129.07097; 131.08662; 159.11792; 169.10227; 195.11792; 197.13357; 221.13357; 237.16487	12.12; 100.00; 18.17; 91.07; 23.40; 44.02; 20.41; 14.02; 10.28; 13.38; 10.85; 12.16; 21.21
207	243.16152	244.1687967	C14H20N4	C1CCC(CC1)(C#N)N=NC2(CCCCC2)C#N	136.08802; 243.16152	2.95; 100.00	106.06622; 108.08187; 123.09277; 136.08802; 226.13497; 243.16152	18.73; 6.53; 7.54; 8.09; 5.93; 100.00	102.03492; 104.05057; 106.06622; 108.08187; 119.06147; 121.07712; 123.09277; 187.09892; 201.11457; 213.11457; 215.13022; 227.13022; 241.14587; 243.16152	18.57; 16.97; 16.60; 13.11; 100.00; 49.94; 15.22; 9.69; 8.66; 8.93; 10.34; 10.10; 11.09; 12.38
208	96.96173	97.9690055	C2H4Cl2	CC(Cl)Cl	60.98505; 96.96173	100.00; 23.56	34.96940; 96.96173	40.36; 100.00	34.96940; 96.96173	2.92; 100.00
209	94.94608	95.9533555	C2H2Cl2	C=C(Cl)Cl	34.96940; 94.94608	35.38; 100.00	34.96940; 94.94608	100.00; 2.07	34.96940; 94.94608	100.00; 5.02
210	124.95664	125.9639201	C3H4Cl2O	CC(=O)C(Cl)Cl	41.00329; 124.95664	1.84; 100.00	41.00329; 124.95664	9.10; 100.00	41.00329; 124.95664	100.00; 79.65
211	108.96173	109.9690055	C3H4Cl2	CC=C(Cl)Cl	34.96940; 108.96173	100.00; 99.21	34.96940; 72.98505	100.00; 0.92	34.96940; 72.98505	100.00; 11.09
212	163.09758	164.104859	C7H16O4	COCCOCC(OC)OC	43.01894; 57.03459; 59.01385; 73.02950; 75.04515; 89.02442	49.63; 25.81; 100.00; 57.81; 96.53; 45.95	59.01385; 73.02950; 75.04515; 89.02442	30.23; 68.74; 32.19; 100.00	41.00329; 43.01894; 57.03459; 59.01385; 73.02950; 89.02442	27.37; 39.88; 16.34; 49.99; 100.00; 33.55
213	197.1547	198.1619799	C12H22O2	CC(=CCCC(=CC(OC)OC)C)C	123.11792; 197.15470	68.11; 100.00	107.08662; 111.11792; 119.08662; 121.10227; 123.11792; 165.12849; 181.12340; 195.13905; 197.15470	8.55; 8.96; 6.55; 100.00; 79.21; 25.75; 10.46; 13.40; 35.25	55.01894; 57.03459; 73.02950; 79.05532; 87.04515; 97.06589; 99.08154; 101.06080; 107.08662; 109.10227; 115.07645; 119.08662; 121.10227; 123.11792; 137.06080; 151.11284; 153.09210; 163.11284; 165.09210; 165.12849; 167.14414; 179.10775; 181.12340; 193.12340; 195.13905	11.90; 18.15; 11.04; 22.43; 12.91; 13.64; 28.56; 17.70; 36.85; 11.50; 10.21; 19.36; 31.77; 29.36; 10.80; 26.99; 11.77; 29.55; 12.04; 10.68; 30.33; 100.00; 14.17; 87.29; 28.57
214	89.0608	90.06807956	C4H10O2	CC(OC)OC	43.01894; 57.03459	11.09; 100.00	41.00329; 57.03459	20.87; 100.00	41.00329; 43.01894	69.51; 100.00
215	59.06147	60.06874826	C2H8N2	CN(C)N	42.03492; 59.06147	3.47; 100.00	42.03492; 59.06147	52.35; 100.00	42.03492; 43.03017	78.00; 100.00
216	149.09719	150.1044651	C10H14O	CC(C)(CC1=CC=CC=C1)O	131.08662; 149.09719	67.53; 100.00	57.03459; 91.05532	100.00; 36.77	57.03459; 91.05532	24.94; 100.00
217	287.08934	288.0966202	C12H20N2O2S2	C1CCC(=O)N(CC1)SSN2CCCCCC2=O	142.03321; 144.04886	100.00; 19.93	110.06114; 140.01756; 142.03321; 144.04886	36.29; 15.69; 44.73; 100.00	32.98044; 41.99854; 45.97569; 64.95252; 110.06114; 112.07679; 142.03321; 144.04886; 189.01618	100.00; 5.45; 6.62; 90.09; 8.58; 8.75; 11.66; 18.71; 5.51
218	145.05063	146.0579088	C6H10O4	CC(OC(=O)C)OC(=O)C	43.01894; 59.01385	35.18; 100.00	43.01894; 59.01385	7.54; 100.00	41.00329; 59.01385	14.51; 100.00
219	261.16085	262.1681279	C15H22N2O2	C1CC(CCC1CC2CCC(CC2)N=C=O)N=C=O	233.16594; 261.16085	100.00; 67.66	41.99854; 233.16594	100.00; 8.25	41.99854; 106.06622; 110.09752; 122.09752; 164.10809; 192.13939; 200.14447; 205.13464; 233.12955; 233.16594; 241.13464; 259.14520	100.00; 2.58; 4.53; 2.17; 4.17; 4.54; 1.98; 2.06; 2.17; 7.04; 2.74; 2.29
220	792.34999	793.35727	C12H2Br8O	C1=C(C(=C(C(=C1Br)Br)Br)Br)OC2=CC(=C(C(=C2Br)Br)Br)Br	792.34999	100	792.34999	100	792.34999	100
221	133.08702	134.0942943	C6H14O3	CC(COCC(C)O)O	57.03459; 75.04515; 115.07645; 133.08702	54.87; 69.62; 36.58; 100.00	43.01894; 57.03459; 133.08702	8.08; 100.00; 8.89	43.01894; 55.01894; 57.03459; 59.01385	100.00; 17.16; 34.27; 26.05
222	170.15504	171.1623143	C10H21NO	CC1(CC(CC(N1C)(C)C)O)C	168.13939; 170.15504	1.51; 100.00	84.08187; 126.12882; 152.14447; 170.15504	12.00; 10.67; 100.00; 98.58	136.11317; 152.14447; 168.13939; 170.15504	60.01; 88.96; 34.74; 100.00
223	286.85279	287.860066	C6H6Cl6	C1(C(C(C(C(C1Cl)Cl)Cl)Cl)Cl)Cl	250.87611; 286.85279	2.71; 100.00	250.87611; 286.85279	19.26; 100.00	284.83714; 286.85279	13.90; 100.00
224	233.03029	234.0375673	C8H10O8	C(C(C(CC(=O)O)C(=O)O)C(=O)O)C(=O)O	143.03498; 145.05063	100.00; 45.73	143.03498; 145.05063; 189.04046	100.00; 69.07; 19.73	59.01385; 68.99820; 71.01385; 73.02950; 115.00368; 129.01933; 141.01933; 143.03498; 145.05063; 171.02990	78.51; 26.38; 54.80; 25.89; 29.38; 99.40; 32.61; 100.00; 65.72; 16.98
225	212.88378	213.891061	C6H2Cl4	C1=CC(=C(C(=C1Cl)Cl)Cl)Cl	118.94608; 212.88378	0.05; 100.00	118.94608; 212.88378	8.96; 100.00	94.94608; 212.88378	0.08; 100.00
226	132.08187	133.0891494	C9H11N	C1CNCC2=CC=CC=C21	91.05532; 132.08187	2.65; 100.00	130.06622; 132.08187	4.31; 100.00	77.03967; 89.03967; 91.05532; 103.05532; 104.05057; 115.05532; 116.05057; 130.06622; 132.08187	26.18; 19.66; 18.52; 37.21; 59.10; 100.00; 42.07; 54.94; 17.82
227	147.08154	148.088815	C10H12O	C1CC(C2=CC=CC=C2C1)O	129.07097; 147.08154	100.00; 15.08	129.07097; 147.08154	60.46; 100.00	65.03967; 77.03967; 91.05532; 103.05532; 127.05532; 129.07097	27.85; 29.75; 96.78; 27.80; 22.57; 100.00
228	145.06589	146.0731649	C10H10O	C1CC2=CC=CC=C2C(=O)C1	127.05532; 145.06589	1.47; 100.00	143.05024; 145.06589	13.76; 100.00	41.00329; 77.03967; 117.03459; 127.05532; 129.03459; 143.05024	100.00; 19.31; 12.58; 32.63; 10.16; 23.20
229	317.08781	318.0950822	C13H18O9	CC(=O)OCC1C(C(C(O1)OC(=O)C)OC(=O)C)OC(=O)C	59.01385; 197.04555; 215.05611; 257.06668; 275.07724; 317.08781	57.16; 33.95; 100.00; 33.72; 28.47; 75.25	59.01385; 173.04555; 183.02990; 185.04555; 197.04555; 201.04046; 215.05611; 245.06668; 257.06668; 317.08781	100.00; 7.49; 9.25; 22.40; 8.07; 11.55; 19.93; 7.23; 7.73; 7.69	41.00329; 43.01894; 59.01385; 173.04555; 215.05611; 231.05103	36.47; 15.62; 100.00; 7.89; 14.05; 7.08
230	212.88378	213.891061	C6H2Cl4	C1=C(C=C(C(=C1Cl)Cl)Cl)Cl	212.88378	100	212.88378	100	212.88378	100
231	133.10227	134.1095504	C10H14	CC1=CC(=C(C(=C1)C)C)C	131.08662; 133.10227	1.56; 100.00	51.02402; 133.10227	9.08; 100.00	51.02402; 131.08662	84.73; 100.00
232	150.05605	151.0633285	C8H9NO2	C1C=CCC2C1C(=O)NC2=O	41.99854; 150.05605	3.30; 100.00	41.99854; 107.05024; 122.06114; 150.05605	100.00; 32.28; 24.20; 90.73	41.99854; 77.03967; 132.04549; 148.04040	100.00; 11.44; 12.72; 28.95
233	146.03599	147.0432618	C7H5N3O	C1=CC=C2C(=C1)C(=O)NN=N2	118.02984; 146.03599	2.76; 100.00	41.99854; 146.03599	11.58; 100.00	41.99854; 118.02984	100.00; 21.55
234	118.04107	119.0483472	C6H5N3	C1=CC2=NNN=C2C=C1	92.02542; 118.04107	0.67; 100.00	68.02542; 118.04107	3.53; 100.00	92.02542; 118.04107; 0	10.82; 100.00; 118.0410707079
235	178.92276	179.930033	C6H3Cl3	C1=CC(=C(C(=C1)Cl)Cl)Cl	94.94608; 178.92276	0.17; 100.00	82.96940; 178.92276	24.61; 100.00	34.96940; 178.92276	14.81; 100.00
236	144.93841	145.945683	C3H5Cl3	C(C(CCl)Cl)Cl	108.96173; 144.93841	1.37; 100.00	34.96940; 144.93841	100.00; 1.79	34.96940; 144.93841	100.00; 0.42
237	212.88378	213.891061	C6H2Cl4	C1=C(C(=CC(=C1Cl)Cl)Cl)Cl	58.96940; 212.88378	0.01; 100.00	152.90711; 212.88378	1.90; 100.00	152.90711; 212.88378	0.22; 100.00
238	133.10227	134.1095504	C10H14	CC1=CC(=C(C=C1C)C)C	117.07097; 133.10227	4.45; 100.00	51.02402; 91.05532; 117.07097; 133.10227	7.18; 6.50; 21.29; 100.00	65.03967; 91.05532; 93.07097; 133.10227	88.15; 100.00; 94.40; 55.45
239	209.00916	210.0164379	C9H6O6	C1=CC(=C(C=C1C(=O)O)C(=O)O)C(=O)O	121.02950; 165.01933	98.47; 100.00	121.02950; 165.01933	100.00; 30.72	95.01385; 121.02950	33.40; 100.00
240	310.77121	311.77849	C6H3Br3	C1=CC(=C(C=C1Br)Br)Br	206.84505; 310.77121	0.37; 100.00	206.84505; 310.77121	1.91; 100.00	308.75556; 310.77121	1.54; 100.00
241	178.92276	179.930033	C6H3Cl3	C1=CC(=C(C=C1Cl)Cl)Cl	118.94608; 178.92276	0.37; 100.00	118.94608; 178.92276	1.91; 100.00	176.90711; 178.92276	1.54; 100.00
242	167.07137	168.0786442	C9H12O3	COC1=CC(=C(C=C1)OC)OC	137.06080; 167.07137	0.67; 100.00	137.06080; 167.07137	100.00; 81.65	41.00329; 53.00329; 55.01894; 57.03459; 79.01894; 81.03459; 93.03459; 95.05024; 97.02950; 123.04515	66.11; 45.04; 100.00; 36.41; 30.22; 62.24; 74.17; 39.90; 26.40; 26.26
243	119.08662	120.0939004	C9H12	CC1=CC(=C(C=C1)C)C	103.05532; 119.08662	0.98; 100.00	75.02402; 103.05532; 119.08662	7.38; 4.91; 100.00	49.00837; 117.07097; 119.08662	100.00; 30.69; 30.53
244	634.6436	635.65088	C12H18Br6	C1CC(C(CCC(C(CCC(C1Br)Br)Br)Br)Br)Br	554.71743; 634.64360	2.23; 100.00	554.71743; 634.64360	5.33; 100.00	78.91889; 634.64360	100.00; 74.83
245	133.08702	134.0942943	C6H14O3	C(CCO)CC(CO)O	85.06589; 101.06080; 103.07645; 115.07645; 133.08702	12.46; 22.20; 15.04; 31.27; 100.00	59.01385; 69.03459; 73.06589; 83.05024; 85.06589; 97.06589; 101.06080; 115.07645; 133.08702	84.38; 23.45; 52.23; 71.52; 43.98; 31.60; 100.00; 37.98; 26.96	41.00329; 43.01894; 55.01894; 59.01385; 59.05024; 69.03459; 73.06589; 83.05024	91.57; 27.64; 29.18; 100.00; 46.80; 38.42; 45.17; 25.06
246	127.03017	128.0374481	C8H4N2	C1=CC=C(C(=C1)C#N)C#N	74.00362; 127.03017	0.29; 100.00	77.01452; 127.03017	14.10; 100.00	98.00362; 125.01452; 127.03017	52.22; 100.00; 69.71
247	133.0295	134.0367794	C8H6O2	C1=CC=C(C(=C1)C=O)C=O	105.03459; 133.02950	100.00; 31.67	77.03967; 105.03459	100.00; 87.44	63.02402; 65.00329; 77.03967; 89.00329; 131.01385	11.65; 16.78; 100.00; 17.30; 54.32
248	361.23843	362.2457096	C22H34O4	CC(C)CCCCOC(=O)C1=CC=CC=C1C(=O)OCCCCC(C)C	245.11832; 253.18092; 263.12888; 361.23843	9.80; 8.00; 6.43; 100.00	43.01894; 107.05024; 111.08154; 121.02950; 123.04515; 139.07645; 149.02442; 151.04007; 165.01933; 167.03498; 217.12340; 219.13905; 245.11832; 247.13397; 249.14962; 253.18092; 261.11323; 263.12888; 269.17583; 361.23843	7.08; 22.70; 8.79; 34.48; 17.76; 8.15; 25.98; 7.81; 19.18; 6.55; 8.50; 77.44; 12.44; 26.69; 10.36; 13.25; 18.42; 51.59; 8.51; 100.00	43.01894; 59.05024; 68.99820; 77.03967; 105.03459; 107.05024; 113.09719; 115.11284; 121.02950; 123.04515; 125.06080; 127.07645; 139.07645; 147.04515; 149.02442; 149.06080; 151.04007; 165.01933; 167.03498; 175.07645; 177.09210; 189.01933; 191.03498; 203.14414; 205.05063; 219.06628; 219.13905; 223.17035; 231.13905; 305.17583; 361.23843	9.56; 11.69; 12.28; 16.66; 24.64; 32.29; 19.59; 15.42; 100.00; 48.53; 16.56; 50.23; 8.45; 18.25; 39.08; 9.24; 26.01; 61.94; 31.60; 38.65; 11.74; 8.12; 41.01; 10.13; 14.06; 10.03; 19.91; 10.09; 15.50; 9.36; 8.83
249	445.33233	446.3396099	C28H46O4	CC(C)CCCCCCCOC(=O)C1=CC=CC=C1C(=O)OCCCCCCCC(C)C	261.18600; 445.33233	5.70; 100.00	121.02950; 123.04515; 125.13357; 127.14922; 133.10227; 135.11792; 137.13357; 149.09719; 153.12849; 259.17035; 261.18600; 287.16527; 303.16018; 305.17583; 311.22278; 345.20713; 443.31668; 445.33233	22.98; 6.82; 30.75; 8.85; 11.08; 10.33; 5.36; 22.50; 6.69; 6.78; 31.60; 6.37; 5.82; 22.97; 5.49; 9.60; 5.72; 100.00	65.03967; 121.02950; 123.04515; 125.06080; 127.07645; 135.11792; 137.13357; 149.02442; 151.04007; 157.15979; 165.01933; 167.03498; 169.05063; 175.07645; 177.09210; 189.09210; 203.10775; 205.12340; 233.08193; 237.18600; 245.19109; 247.09758; 259.17035; 261.18600; 295.22787; 305.17583; 317.17583; 325.23843; 331.19148; 361.23843; 445.33233	13.93; 100.00; 78.01; 67.81; 28.34; 20.15; 21.63; 42.59; 30.25; 27.01; 74.29; 52.45; 12.08; 14.03; 10.66; 13.60; 42.85; 38.19; 11.52; 11.15; 11.51; 11.08; 13.00; 46.51; 17.63; 14.27; 14.95; 13.26; 18.53; 17.53; 24.01
250	487.37928	488.3865601	C31H52O4	CCCCCCCCCCCCOC(=O)C1=CC=CC=C1C(=O)OCC(CCC)C(CC)CCC	153.16487; 155.18052; 271.13397; 273.18600; 275.20165; 301.18092; 303.19657; 319.19148; 487.37928	4.53; 7.14; 3.45; 2.94; 10.99; 6.23; 4.23; 14.85; 100.00	44.99820; 85.06589; 105.03459; 121.02950; 123.04515; 127.11284; 139.14922; 141.16487; 149.02442; 153.16487; 155.18052; 163.11284; 165.01933; 167.03498; 169.15979; 171.17544; 273.18600; 275.12888; 275.20165; 289.14453; 289.21730; 301.18092; 303.19657; 315.19657; 317.17583; 319.19148; 323.25917; 443.31668; 445.33233; 459.34798; 487.37928	9.04; 5.18; 9.00; 65.83; 21.27; 8.66; 26.55; 25.00; 21.10; 10.50; 5.08; 6.03; 14.83; 9.11; 6.97; 37.01; 13.24; 5.87; 56.21; 6.27; 8.28; 23.01; 7.66; 13.24; 13.11; 51.14; 5.27; 5.60; 6.62; 8.19; 100.00	77.03967; 121.02950; 123.04515; 125.06080; 127.07645; 129.09210; 141.16487; 149.02442; 151.04007; 165.01933; 167.03498; 171.17544; 185.19109; 259.17035; 261.18600; 263.20165; 265.21730; 273.18600; 275.20165; 287.16527; 287.20165; 289.21730; 303.16018; 319.19148; 325.23843; 331.19148; 339.25408; 445.33233; 459.34798; 471.34798; 487.37928	18.71; 100.00; 64.49; 16.98; 20.75; 8.45; 8.94; 19.74; 15.12; 11.03; 5.99; 9.53; 14.31; 18.56; 4.73; 6.25; 4.65; 4.89; 19.53; 10.49; 6.88; 9.10; 14.03; 7.22; 5.53; 5.02; 4.82; 7.90; 4.94; 8.39; 11.79
251	150.00191	151.009185	C7H5NOS	C1=CC=C2C(=C1)C(=O)NS2	123.98626; 150.00191	0.47; 100.00	99.98626; 150.00191	1.37; 100.00	99.98626; 150.00191	0.86; 100.00
252	185.01416	186.021435	C6H12Cl2O2	C(COCCCl)OCCCl	34.96940; 43.01894; 60.98505; 63.00070; 87.04515; 123.02183; 149.03748; 185.01416	90.42; 47.30; 30.19; 18.90; 23.06; 21.24; 100.00; 98.09	34.96940; 43.01894	100.00; 3.91	34.96940; 61.02950	100.00; 4.10
253	245.04642	246.0536928	C14H14S2	C1=CC=C(C=C1)SCCSC2=CC=CC=C2	109.01174; 245.04642	100.00; 76.21	109.01174; 111.02739	100.00; 20.89	109.01174; 133.01174; 164.98382	100.00; 10.45; 5.89
254	113.10842	114.1156985	C6H14N2	C1CCC(C(C1)N)N	84.08187; 113.10842	5.23; 100.00	96.08187; 113.10842	7.48; 100.00	54.03492; 111.09277	4.46; 100.00
255	73.07712	74.08439833	C3H10N2	CC(CN)N	42.03492; 73.07712	3.19; 100.00	56.05057; 73.07712	61.41; 100.00	42.03492; 57.04582; 73.07712	58.43; 38.92; 100.00
256	262.8825	263.88977	C6H6Br2N2	C(CC(CBr)(C#N)Br)C#N	78.91889; 262.88250	10.64; 100.00	78.91889; 262.88250	100.00; 7.79	54.03492; 78.91889	0.52; 100.00
257	422.75997	423.76725	C8H12Br4	C1CC(C(CC1C(CBr)Br)Br)Br	342.83381; 422.75997	3.20; 100.00	78.91889; 328.81816	100.00; 54.66	78.91889; 422.75997	100.00; 55.93
258	184.8607	185.86798	C2H4Br2	C(CBr)Br	78.91889; 104.93454	100.00; 75.20	78.91889; 184.86070	100.00; 0.17	78.91889; 184.86070	100.00; 1.21
259	260.86046	261.867739	C7H3Cl5	C1=CC(=C(C=C1C(Cl)(Cl)Cl)Cl)Cl	260.86046	100	200.88378; 260.86046	7.53; 100.00	200.88378; 260.86046	1.14; 100.00
260	212.94911	213.95639	C7H3Cl2F3	C1=CC(=C(C=C1C(F)(F)F)Cl)Cl	152.97244; 212.94911	0.03; 100.00	152.97244; 212.94911	0.86; 100.00	152.97244; 212.94911	0.06; 100.00
261	144.96173	145.9690055	C6H4Cl2	C1=CC=C(C(=C1)Cl)Cl	118.94608; 144.96173	0.17; 100.00	118.94608; 144.96173	2.03; 100.00	34.96940; 144.96173	32.10; 100.00
262	124.99303	126.0003056	C4H8Cl2	CCC(CCl)Cl	122.97738; 124.99303	6.15; 100.00	34.96940; 75.00070	100.00; 11.71	34.96940; 75.00070	100.00; 25.29
263	96.96173	97.9690055	C2H4Cl2	C(CCl)Cl	60.98505; 96.96173	46.45; 100.00	34.96940; 96.96173	100.00; 0.19	34.96940; 96.96173	100.00; 26.45
264	110.97738	111.9846556	C3H6Cl2	CC(CCl)Cl	75.00070; 110.97738	4.21; 100.00	34.96940; 110.97738	100.00; 23.85	34.96940; 110.97738	100.00; 24.61
265	165.0921	166.0993797	C10H14O2	CCOC1=CC=CC=C1OCC	45.03459; 165.09210	9.15; 100.00	43.01894; 93.03459; 107.01385; 109.02950; 137.06080	13.39; 36.69; 97.04; 100.00; 38.96	43.01894; 45.03459; 93.03459; 107.01385; 109.02950	33.22; 51.85; 53.54; 64.25; 100.00
267	87.02	88.02727738	C2H4N2O2	C(=O)NNC=O	41.99854; 44.01419	100.00; 74.53	41.99854; 44.01419	100.00; 31.38	41.99854; 44.01419	100.00; 0.86
268	172.11317	173.1204495	C12H15N	CC1=CC(NC2=CC=CC=C12)(C)C	146.09752; 172.11317	0.22; 100.00	132.08187; 172.11317	3.98; 100.00	156.08187; 172.11317	71.00; 100.00
269	137.0608	138.0680796	C8H10O2	COC1=CC=CC=C1OC	109.06589; 137.06080	0.40; 100.00	107.05024; 137.06080	21.87; 100.00	41.00329; 49.00837; 51.02402; 53.00329; 55.01894; 63.02402; 65.03967; 67.01894; 93.03459	23.35; 15.72; 25.80; 43.30; 25.01; 38.57; 100.00; 10.78; 29.60
270	213.0921	214.0993797	C14H14O2	C1=CC=C(C=C1)OCCOC2=CC=CC=C2	93.03459; 213.09210	100.00; 18.52	93.03459; 95.05024	100.00; 3.81	77.03967; 93.03459	30.17; 100.00
271	209.0608	210.0680796	C14H10O2	C1=CC=C(C=C1)C(=O)C(=O)C2=CC=CC=C2	105.03459; 209.06080	4.57; 100.00	105.03459; 209.06080	100.00; 78.61	77.03967; 105.03459; 209.06080	100.00; 30.05; 52.99
272	195.08154	196.088815	C14H12O	C1=CC=C(C=C1)CC(=O)C2=CC=CC=C2	91.05532; 195.08154	1.85; 100.00	91.05532; 195.08154	29.71; 100.00	77.03967; 91.05532; 143.05024; 145.06589; 167.05024; 169.06589; 177.07097; 195.08154	83.85; 100.00; 43.06; 37.00; 95.76; 49.32; 54.04; 38.43
273	183.09277	184.1000484	C12H12N2	C1=CC=C(C=C1)NNC2=CC=CC=C2	77.03967; 183.09277	9.41; 100.00	77.03967; 183.09277	100.00; 95.29	77.03967; 92.05057; 153.04582; 181.07712	20.22; 100.00; 16.51; 28.28
274	69.03459	70.04186481	C4H6O	C=CC1CO1	51.02402; 69.03459	47.83; 100.00	51.02402; 69.03459	28.62; 100.00	41.00329; 51.02402; 53.00329	100.00; 73.87; 25.06
275	71.05024	72.05751487	C4H8O	CCC1CO1	41.03967; 71.05024	46.91; 100.00	69.03459; 71.05024	87.98; 100.00	41.00329; 55.01894	38.42; 100.00
276	155.14414	156.1514153	C10H20O	CCCCCCCCC1CO1	153.12849; 155.14414	4.51; 100.00	111.11792; 153.12849; 155.14414	8.33; 7.72; 100.00	41.00329; 43.01894; 53.03967; 55.01894; 55.05532; 57.03459; 57.07097; 67.05532; 69.07097; 71.08662; 123.11792; 125.13357; 127.14922; 155.14414	90.58; 6.54; 10.88; 100.00; 8.46; 6.61; 25.29; 22.20; 7.49; 21.65; 6.35; 15.73; 18.21; 15.25
277	183.17544	184.1827154	C12H24O	CCCCCCCCCCC1CO1	181.15979; 183.17544	11.34; 100.00	181.15979; 183.17544	9.00; 100.00	41.00329; 43.01894; 53.03967; 55.01894; 57.07097; 67.05532; 71.08662; 85.10227; 99.11792; 125.09719; 151.14922; 153.16487; 155.18052; 167.14414; 181.15979; 183.17544	84.32; 9.12; 15.69; 100.00; 29.55; 33.81; 32.16; 9.33; 13.50; 9.50; 7.08; 15.37; 24.19; 22.47; 11.28; 66.34
278	239.23804	240.2453156	C16H32O	CCCCCCCCCCCCCCC1CO1	237.22239; 239.23804	11.38; 100.00	237.22239; 239.23804	8.98; 100.00	41.00329; 43.01894; 55.01894; 57.07097; 67.05532; 71.08662; 99.11792; 125.09719; 125.13357; 127.14922; 141.12849; 153.12849; 167.14414; 167.18052; 181.15979; 181.19617; 207.21182; 209.19109; 209.22747; 211.24312; 223.20674; 237.22239; 239.23804	99.70; 16.62; 70.98; 12.35; 8.06; 17.54; 11.92; 7.79; 8.10; 14.67; 7.82; 8.83; 9.26; 11.04; 13.34; 11.21; 9.49; 7.83; 20.55; 32.44; 33.70; 15.32; 100.00
279	211.20674	212.2140155	C14H28O	CCCCCCCCCCCCC1CO1	209.19109; 211.20674	11.37; 100.00	209.19109; 211.20674	8.98; 100.00	41.00329; 43.01894; 53.03967; 55.01894; 57.07097; 67.05532; 71.08662; 99.11792; 125.09719; 125.13357; 127.14922; 153.16487; 167.14414; 179.18052; 181.15979; 181.19617; 183.21182; 195.17544; 209.19109; 211.20674	100.00; 14.54; 7.55; 75.95; 20.62; 13.46; 24.50; 9.08; 9.72; 9.95; 8.19; 9.97; 9.84; 6.91; 6.85; 17.90; 26.25; 24.47; 13.46; 86.00
280	145.05063	146.0579088	C6H10O4	CC(=O)OCCOC(=O)C	43.01894; 59.01385; 103.04007	34.18; 100.00; 26.60	41.00329; 59.01385	5.07; 100.00	41.00329; 59.01385	28.02; 100.00
281	145.1234	146.1306798	C8H18O2	CCCCCCC(CO)O	127.11284; 145.12340	42.79; 100.00	59.01385; 59.05024; 95.08662; 111.08154; 113.09719; 115.11284; 127.11284; 143.10775; 145.12340	33.49; 13.09; 15.39; 14.39; 100.00; 33.46; 20.19; 12.47; 47.01	41.00329; 43.01894; 55.01894; 57.03459; 59.01385; 59.05024; 69.03459; 73.06589; 97.10227; 99.11792	100.00; 12.84; 32.79; 11.03; 95.81; 21.09; 7.15; 7.32; 8.90; 9.95
282	107.06147	108.0687483	C6H8N2	C1=CC=C(C(=C1)N)N	80.05057; 107.06147	2.37; 100.00	80.05057; 107.06147	1.52; 100.00	40.01927; 42.03492; 52.01927; 64.01927; 66.03492; 107.06147	100.00; 19.12; 19.63; 92.18; 62.32; 80.16
283	75.04515	76.05242949	C3H8O2	CC(CO)O	57.03459; 75.04515	100.00; 69.07	57.03459; 59.01385	100.00; 18.51	41.00329; 43.01894	24.58; 100.00
284	341.30612	342.3133952	C21H42O3	CCCCCCCCCCCCCCCCCC(=O)OCC(C)O	57.03459; 265.25369; 283.26425; 341.30612	55.44; 61.38; 17.93; 100.00	41.00329; 43.01894; 57.03459; 59.01385; 73.02950; 75.04515; 97.02950; 99.04515; 237.25877; 239.27442; 265.25369; 283.26425; 323.29555; 341.30612	7.03; 12.63; 58.11; 8.78; 12.57; 16.85; 10.51; 4.78; 5.10; 8.62; 100.00; 51.56; 31.43; 42.42	43.01894; 44.99820; 47.01385; 57.03459; 59.01385; 61.02950; 71.01385; 73.02950; 75.04515; 99.04515; 101.06080; 103.07645; 113.06080; 115.07645; 141.09210; 143.10775; 145.12340; 155.10775; 157.12340; 197.15470; 199.17035; 201.18600; 211.17035; 213.18600; 225.18600; 227.20165; 239.20165; 253.21730; 265.25369; 281.24860; 283.26425	8.25; 29.85; 6.64; 6.88; 37.91; 16.01; 63.55; 24.82; 24.17; 15.31; 15.94; 6.55; 9.07; 6.77; 14.10; 11.04; 8.26; 9.43; 9.87; 9.35; 11.58; 7.08; 8.67; 7.22; 14.22; 11.43; 7.62; 9.93; 31.06; 21.71; 100.00
285	262.9075	263.914777	C9H3Cl3O3	C1=C(C=C(C=C1C(=O)Cl)C(=O)Cl)C(=O)Cl	34.96940; 262.90750	1.43; 100.00	34.96940; 262.90750	41.24; 100.00	34.96940; 262.90750	100.00; 0.80
286	209.00916	210.0164379	C9H6O6	C1=C(C=C(C=C1C(=O)O)C(=O)O)C(=O)O	165.01933; 209.00916	100.00; 63.78	121.02950; 165.01933	100.00; 68.89	121.02950; 165.01933	100.00; 3.79
287	366.79743	367.8047	C9H7Br3O	C=CCOC1=C(C=C(C=C1Br)Br)Br	326.76612; 366.79742	0.37; 100.00	310.77121; 364.78177; 366.79742	16.65; 24.55; 100.00	78.91889; 364.78177	100.00; 7.71
288	354.79743	355.8047	C8H7Br3O	CC1=C(C(=C(C=C1Br)Br)OC)Br	78.91889; 354.79742	0.18; 100.00	78.91889; 354.79742	6.92; 100.00	78.91889; 324.78686	100.00; 4.04
289	178.92276	179.930033	C6H3Cl3	C1=C(C=C(C=C1Cl)Cl)Cl	178.92276	100	178.92276	100	178.92276	100
290	170.16627	171.1735477	C9H21N3	CCN1CN(CN(C1)CC)CC	56.05057; 170.16627	1.82; 100.00	42.03492; 170.16627	7.68; 100.00	42.03492; 112.08802; 114.10367; 126.10367; 128.11932; 138.10367; 140.11932; 142.13497; 168.15062	78.49; 63.90; 70.50; 24.32; 17.04; 70.92; 100.00; 51.42; 29.86
291	203.18052	204.1878008	C15H24	CC(C)C1=CC(=CC(=C1)C(C)C)C(C)C	201.16487; 203.18052	0.34; 100.00	201.16487; 203.18052	2.71; 100.00	69.07097; 119.08662; 143.08662; 145.10227; 161.13357; 171.11792; 187.14922; 201.16487; 203.18052	52.04; 37.44; 60.88; 100.00; 42.04; 76.14; 61.53; 49.51; 49.90
292	167.07137	168.0786442	C9H12O3	COC1=CC(=CC(=C1)OC)OC	137.06080; 167.07137	0.02; 100.00	137.06080; 167.07137	3.45; 100.00	107.05024; 123.04515; 137.06080; 167.07137	54.21; 100.00; 75.39; 27.42
293	119.08662	120.0939004	C9H12	CC1=CC(=CC(=C1)C)C	79.05532; 119.08662	0.04; 100.00	103.05532; 119.08662	6.05; 100.00	63.02402; 119.08662	7.08; 100.00
294	89.02442	90.03169405	C3H6O3	C1OCOCO1	44.99820; 89.02442	100.00; 36.03	44.99820; 89.02442	100.00; 1.76	44.99820; 61.02950	100.00; 0.74
296	160.08802	161.0952974	C9H11N3	C(CC#N)CC(CCC#N)C#N	129.04582; 131.06147; 160.08802	15.41; 40.06; 100.00	40.01927; 64.01927; 66.03492; 78.03492; 90.03492; 107.06147; 114.03492; 116.05057; 127.03017; 129.04582; 131.06147; 133.07712; 143.06147; 158.07237; 160.08802	16.72; 9.00; 8.79; 12.70; 19.20; 9.61; 16.85; 16.02; 10.64; 100.00; 26.45; 29.65; 46.96; 8.64; 57.73	40.01927; 50.00362; 52.01927; 54.03492; 64.01927; 66.03492; 74.00362; 76.01927; 78.03492; 88.01927; 89.01452; 90.03492; 92.05057; 101.01452; 105.04582; 107.06147	78.17; 81.37; 33.74; 32.92; 94.54; 84.71; 34.23; 31.66; 40.34; 32.41; 51.97; 100.00; 35.87; 51.21; 28.39; 44.79
297	107.06147	108.0687483	C6H8N2	C1=CC(=CC(=C1)N)N	66.03492; 107.06147	5.59; 100.00	91.03017; 107.06147	18.48; 100.00	40.01927; 64.01927; 65.01452; 107.06147	100.00; 51.11; 54.49; 30.93
298	127.03017	128.0374481	C8H4N2	C1=CC(=CC(=C1)C#N)C#N	74.00362; 127.03017	0.14; 100.00	52.01927; 127.03017	6.30; 100.00	74.00362; 76.01927; 127.03017	51.57; 34.06; 100.00
299	200.95156	201.9588348	C8H4Cl2O2	C1=CC(=CC(=C1)C(=O)Cl)C(=O)Cl	34.96940; 200.95156	31.85; 100.00	34.96940; 200.95156	15.26; 100.00	34.96940; 49.00837; 112.97997	100.00; 35.88; 57.89
300	165.01933	166.0266087	C8H6O4	C1=CC(=CC(=C1)C(=O)O)C(=O)O	121.02950; 165.01933	75.28; 100.00	77.03967; 121.02950	100.00; 54.35	49.00837; 77.03967	7.76; 100.00
301	135.09277	136.1000484	C8H12N2	C1=CC(=CC(=C1)CN)CN	118.06622; 135.09277	26.18; 100.00	77.03967; 118.06622; 135.09277	28.82; 93.58; 100.00	40.01927; 64.01927; 66.03492; 77.03967; 82.06622; 91.03017; 91.05532; 102.03492; 106.06622; 116.05057; 118.06622	7.87; 25.05; 11.39; 22.29; 7.79; 9.37; 38.71; 9.98; 16.62; 100.00; 17.89
302	243.1139	244.1211778	C14H16N2O2	CC(C)(C1=CC(=CC=C1)C(C)(C)N=C=O)N=C=O	200.10809; 243.11390	68.26; 100.00	41.99854; 243.11390	100.00; 1.15	41.99854; 117.07097; 157.10227	100.00; 28.09; 26.82
303	315.08741	316.0946882	C17H16O6	C1=CC(=CC=C1C(=O)O)OCCCOC2=CC=C(C=C2)C(=O)O	93.03459; 315.08741	10.07; 100.00	93.03459; 119.05024; 133.06589; 137.02442; 177.05572; 225.09210; 227.10775; 271.09758; 315.08741	100.00; 11.42; 12.67; 31.64; 16.30; 56.48; 30.25; 29.90; 21.33	67.01894; 77.03967; 93.03459; 107.01385; 109.02950; 137.02442; 219.06628; 289.07176	6.82; 24.05; 100.00; 6.57; 8.49; 15.75; 6.28; 6.56
304	193.09825	194.1055277	C10H14N2O2	C1CC(CC(C1)CN=C=O)CN=C=O	41.99854; 56.01419; 165.10334; 193.09825	42.74; 8.63; 100.00; 21.11	41.99854; 137.10842	44.08; 100.00	41.99854; 56.01419; 132.04549	100.00; 5.26; 7.37
305	89.0608	90.06807956	C4H10O2	CC(CCO)O	59.05024; 89.06080	7.60; 100.00	43.01894; 57.03459; 59.05024; 71.05024; 73.02950; 89.06080	97.05; 51.19; 51.67; 100.00; 60.74; 68.69	43.01894; 55.01894; 57.03459	63.76; 27.77; 100.00
306	141.13972	142.1469986	C8H18N2	C1CC(CC(C1)CN)CN	124.11317; 141.13972	1.22; 100.00	139.12407; 141.13972	11.35; 100.00	40.01927; 42.03492; 58.06622; 68.05057; 82.06622; 84.08187; 93.07097; 96.08187; 99.09277; 100.11317; 108.08187; 110.09752; 112.11317; 124.11317; 125.10842; 139.12407; 141.13972	11.87; 29.65; 13.09; 25.54; 12.38; 7.29; 9.43; 11.05; 22.70; 25.14; 13.24; 38.66; 24.47; 12.80; 10.99; 19.77; 100.00
307	111.04515	112.0524295	C6H8O2	C1CC(=O)CC(=O)C1	41.00329; 111.04515	24.20; 100.00	41.00329; 57.03459; 111.04515	56.29; 42.09; 100.00	41.00329; 53.00329; 57.03459; 65.03967; 91.01894	100.00; 5.97; 30.89; 4.91; 7.70
308	65.03967	66.04695019	C5H6	C1C=CC=C1	63.02402; 65.03967	0.01; 100.00	63.02402; 65.03967	1.20; 100.00	49.00837; 65.03967	9.71; 100.00
309	282.87233	283.8796	C5H6Br2N2O2	CC1(C(=O)N(C(=O)N1Br)Br)C	161.95600; 282.87233	1.58; 100.00	161.95600; 282.87233	22.46; 100.00	78.91889; 121.92470; 161.95600; 214.84611; 282.87233	15.62; 39.68; 100.00; 20.28; 20.49
310	198.87635	199.88363	C3H6Br2	C(CBr)CBr	196.86070; 198.87635	4.48; 100.00	78.91889; 198.87635	100.00; 0.04	78.91889; 198.87635	100.00; 0.02
311	122.97738	123.9846556	C4H6Cl2	CC(=CCCl)Cl	34.96940; 122.97738	100.00; 38.33	34.96940; 122.97738	100.00; 24.12	34.96940; 106.94608	100.00; 0.01
312	126.97229	127.9795702	C3H6Cl2O	C(C(CCl)O)Cl	90.99562; 126.97229	10.28; 100.00	34.96940; 76.97997	100.00; 5.70	34.96940; 76.97997	100.00; 4.92
313	194.97336	195.9806328	C5H6Cl2N2O2	CC1(C(=O)N(C(=O)N1Cl)Cl)C	118.00652; 194.97336	1.58; 100.00	118.00652; 194.97336	22.46; 100.00	34.96940; 77.97521; 118.00652; 126.94714; 194.97336	15.62; 39.68; 100.00; 20.28; 20.49
314	144.96173	145.9690055	C6H4Cl2	C1=CC(=CC(=C1)Cl)Cl	84.98505; 144.96173	0.44; 100.00	82.96940; 144.96173	0.93; 100.00	34.96940; 144.96173	15.53; 100.00
315	110.97738	111.9846556	C3H6Cl2	C(CCl)CCl	75.00070; 110.97738	4.78; 100.00	34.96940; 110.97738	100.00; 0.03	34.96940; 110.97738	100.00; 0.33
316	124.95664	125.9639201	C3H4Cl2O	C(C(=O)CCl)Cl	74.96432; 124.95664	2.87; 100.00	74.96432; 124.95664	99.87; 100.00	74.96432; 124.95664	100.00; 21.77
317	108.96173	109.9690055	C3H4Cl2	C(C=CCl)Cl	34.96940; 108.96173	10.88; 100.00	34.96940; 106.94608	100.00; 0.03	34.96940; 72.98505	100.00; 0.02
318	390.16119	391.1684623	C26H21N3O	C1=CC=C(C=C1)N2C3=CC=CC=C3C(C2=O)(CC4=CC=NC=C4)CC5=CC=NC=C5	362.16627; 390.16119	4.97; 100.00	92.05057; 390.16119	24.95; 100.00	92.05057; 118.02984; 168.08187; 193.07712; 337.13464; 338.12989; 349.13464; 362.16627; 364.14554; 388.14554; 390.16119	69.82; 85.34; 14.74; 100.00; 44.49; 23.25; 9.65; 19.01; 13.61; 13.16; 14.18
319	194.07237	195.0796473	C12H9N3	C1=CC=C2C=C3C(=CC2=C1)C(=NC3=N)N	152.05057; 194.07237	0.88; 100.00	152.05057; 194.07237	10.23; 100.00	152.05057; 194.07237	100.00; 16.49
320	161.13357	162.1408506	C12H18	CC(C)C1=CC(=CC=C1)C(C)C	159.11792; 161.13357	1.28; 100.00	145.10227; 161.13357	2.70; 100.00	51.02402; 65.03967; 67.05532; 77.03967; 79.05532; 91.05532; 95.08662; 101.03967; 105.07097; 117.07097; 119.08662; 145.10227; 159.11792; 161.13357	24.00; 57.43; 21.89; 38.92; 29.26; 100.00; 21.63; 16.99; 16.73; 18.30; 39.86; 34.30; 22.05; 67.73
321	137.0608	138.0680796	C8H10O2	COC1=CC(=CC=C1)OC	107.05024; 137.06080	2.01; 100.00	107.05024; 137.06080	25.08; 100.00	41.00329; 51.02402; 55.01894; 57.03459; 65.00329; 93.03459	100.00; 48.96; 79.91; 19.18; 21.81; 32.51
322	100.11317	101.1204495	C6H15N	CC(C)CC(C)N	98.09752; 100.11317	47.47; 100.00	98.09752; 100.11317	100.00; 99.12	42.03492; 67.05532; 100.11317	100.00; 9.00; 22.09
323	119.04622	120.0534921	C3H8N2O3	C(NC(=O)NCO)O	44.01419; 46.02984	100.00; 80.37	44.01419; 72.00910	100.00; 72.81	41.99854; 44.01419	21.21; 100.00
324	238.13497	239.1422476	C15H17N3	CC1=CC=CC=C1NC(=NC2=CC=CC=C2C)N	131.06147; 133.07712; 238.13497	91.17; 27.66; 100.00	106.06622; 131.06147; 133.07712	79.53; 25.88; 100.00	41.01452; 91.05532; 106.06622; 129.04582; 131.06147; 133.07712	70.05; 13.16; 100.00; 14.69; 38.20; 24.92
325	147.06628	148.0735589	C6H12O4	C1C(COCO1)(CO)CO	85.02950; 87.04515; 99.04515; 117.05572; 147.06628	100.00; 61.96; 71.34; 94.08; 73.73	44.99820; 87.04515; 99.04515; 101.06080; 115.04007; 129.05572; 147.06628	100.00; 13.16; 23.83; 8.14; 7.39; 13.83; 24.62	44.99820; 59.01385; 71.01385; 73.02950; 85.02950; 87.04515; 103.04007; 115.04007; 119.07137	100.00; 12.44; 10.08; 22.87; 8.39; 57.91; 9.29; 8.44; 9.09
326	87.00877	88.01604399	C3H4O3	C1COC(=O)O1	43.01894; 60.99312	100.00; 43.46	43.01894; 44.99820	100.00; 15.71	41.00329; 43.01894	33.43; 100.00
327	73.0295	74.03677943	C3H6O2	C1COCO1	43.01894; 73.02950	100.00; 25.26	29.00329; 43.01894; 55.01894; 73.02950	32.27; 29.73; 100.00; 60.89	41.00329; 43.01894; 44.99820	38.82; 100.00; 69.95
328	223.07645	224.0837296	C15H12O2	C1=CC=C(C=C1)C(=O)CC(=O)C2=CC=CC=C2	119.05024; 223.07645	13.74; 100.00	119.05024; 145.02950; 223.07645	20.47; 15.08; 100.00	41.00329; 77.03967; 119.05024; 171.04515; 205.06589	44.09; 100.00; 19.82; 18.97; 59.86
329	210.10367	211.1109474	C13H13N3	C1=CC=C(C=C1)NC(=NC2=CC=CC=C2)N	92.05057; 210.10367	100.00; 37.71	117.04582; 210.10367	100.00; 93.26	92.05057; 117.04582; 193.07712; 194.07237	100.00; 45.76; 14.23; 10.61
330	143.11899	144.1262631	C7H16N2O	CC(C)NC(=O)NC(C)C	41.99854; 84.04549; 143.11899	100.00; 89.70; 69.91	56.05057; 58.06622	54.41; 100.00	41.99854; 42.03492	100.00; 17.71
331	201.14962	202.1568946	C11H22O3	CCCCCCC(CCOC(=O)C)O	59.01385; 129.12849; 141.12849; 159.13905; 201.14962	100.00; 19.60; 11.88; 21.08; 79.65	43.01894; 59.01385; 111.08154; 111.11792; 113.09719; 127.11284; 129.12849; 141.12849; 201.14962	22.56; 100.00; 13.46; 20.74; 24.87; 26.98; 19.59; 16.89; 9.33	41.00329; 43.01894; 57.03459; 59.01385; 59.05024; 101.09719; 111.11792; 113.09719	37.02; 11.59; 8.79; 100.00; 11.03; 18.60; 11.50; 8.09
332	120.99649	122.0037652	C3H6O3S	C1COS(=O)(=O)C1	90.98592; 120.99649	2.03; 100.00	80.96519; 120.99649	7.14; 100.00	76.97027; 94.98084; 120.99649	58.08; 100.00; 36.32
333	75.04515	76.05242949	C3H8O2	C(CO)CO	57.03459; 75.04515	50.45; 100.00	55.01894; 57.03459; 73.02950; 75.04515	48.17; 100.00; 62.60; 50.60	43.01894; 57.03459	100.00; 93.58
334	313.11938	314.1266571	C17H18N2O4	C1=CC(=CC=C1C(=O)OCCCOC(=O)C2=CC=C(C=C2)N)N	136.04040; 313.11938	11.05; 100.00	92.05057; 136.04040; 176.07170; 313.11938	100.00; 34.33; 82.18; 57.05	92.05057; 120.04549; 136.04040	100.00; 19.63; 16.31
335	57.03459	58.04186481	C3H6O	C1COC1	39.02402; 57.03459	4.00; 100.00	55.01894; 57.03459	40.76; 100.00	39.02402; 57.03459	100.00; 32.37
336	175.04007	176.0473441	C10H8O3	C1=CC2=C(C=CC(=C2C(=C1)O)O)O	157.02950; 175.04007	4.99; 100.00	93.03459; 175.04007	16.31; 100.00	53.00329; 65.00329; 91.01894; 93.03459; 119.01385; 129.03459; 131.01385; 145.02950; 157.02950	19.79; 14.60; 16.75; 100.00; 50.39; 26.89; 18.95; 37.80; 42.60
337	107.06147	108.0687483	C6H8N2	C1=CC(=CC=C1N)N	77.01452; 107.06147	1.37; 100.00	77.01452; 107.06147	2.47; 100.00	40.01927; 50.00362; 54.03492; 105.04582; 107.06147	33.76; 9.51; 15.55; 100.00; 30.92
338	200.95156	201.9588348	C8H4Cl2O2	C1=CC(=CC=C1C(=O)Cl)C(=O)Cl	34.96940; 200.95156	37.12; 100.00	34.96940; 200.95156	6.52; 100.00	34.96940; 112.97997	100.00; 61.35
339	107.01385	108.0211294	C6H4O2	C1=CC(=O)C=CC1=O	79.01894; 107.01385	0.65; 100.00	79.01894; 107.01385	22.26; 100.00	77.00329; 79.01894	100.00; 79.18
340	193.1234	194.1306798	C12H18O2	CC(C)(C1=CC=C(C=C1)C(C)(C)O)O	175.11284; 193.12340	3.09; 100.00	57.03459; 193.12340	10.82; 100.00	57.03459; 109.06589; 117.07097; 135.08154; 157.10227; 175.11284; 193.12340	47.08; 16.94; 100.00; 15.40; 16.80; 16.95; 45.71
341	173.08193	174.0892089	C8H14O4	C(COCC#CCOCCO)O	43.01894; 59.01385; 61.02950; 173.08193	24.88; 18.38; 33.05; 100.00	41.00329; 51.02402; 53.03967; 55.01894; 59.01385; 61.02950; 67.01894; 69.03459; 81.03459; 95.05024; 111.04515; 173.08193	15.18; 39.15; 12.49; 27.12; 22.61; 100.00; 47.75; 29.50; 19.64; 10.78; 58.88; 19.03	43.01894; 59.01385; 61.02950; 67.01894	100.00; 40.63; 45.24; 22.95
342	165.0921	166.0993797	C10H14O2	COCC1=CC=C(C=C1)COC	133.06589; 165.09210	43.97; 100.00	77.03967; 91.05532; 103.05532; 105.07097; 119.05024; 121.06589; 135.08154	20.50; 30.76; 51.21; 100.00; 66.99; 30.88; 33.47	77.03967; 91.05532; 105.03459; 117.03459; 119.05024; 121.06589	38.23; 8.15; 100.00; 22.97; 59.40; 16.72
343	321.16085	322.1681279	C20H22N2O2	CC(C)NC1=C2C(=C(C=C1)NC(C)C)C(=O)C3=CC=CC=C3C2=O	264.10300; 321.16085	8.47; 100.00	305.12955; 319.14520; 321.16085	11.10; 6.45; 100.00	123.09277; 175.08769; 203.08260; 222.05605; 235.05130; 237.06695; 239.08260; 246.05605; 248.07170; 251.11899; 252.10300; 261.06695; 262.08735; 263.08260; 265.09825; 279.11390; 293.16594; 305.12955; 321.16085	18.14; 30.33; 14.40; 27.76; 82.96; 85.15; 17.00; 17.69; 36.04; 100.00; 20.85; 16.82; 20.17; 85.31; 29.59; 32.99; 29.32; 15.90; 19.93
344	308.83714	309.844416	C8H4Cl6	C1=CC(=CC=C1C(Cl)(Cl)Cl)C(Cl)(Cl)Cl	282.82149; 308.83714	0.01; 100.00	282.82149; 308.83714	1.05; 100.00	282.82149; 308.83714	0.12; 100.00
345	195.13905	196.1463299	C12H20O2	C=COCC1CCC(CC1)COC=C	43.01894; 125.09719; 149.09719; 151.11284; 153.12849; 169.12340; 195.13905	25.36; 17.06; 17.89; 22.59; 12.08; 14.56; 100.00	41.00329; 43.01894; 109.10227; 111.11792; 151.11284	13.88; 17.70; 100.00; 9.27; 8.26	41.00329; 43.01894; 67.01894; 111.08154; 113.09719; 125.09719; 127.11284; 141.09210; 143.10775; 167.10775; 169.12340	34.59; 100.00; 7.89; 56.85; 36.76; 34.05; 8.51; 23.32; 7.72; 14.66; 7.07
346	398.92671	399.933988	C16H8Cl4N2O2	C1=CC(=CC=C1OC2=C(C=C(C=N2)Cl)Cl)OC3=C(C=C(C=N3)Cl)Cl	372.91106; 398.92671	0.05; 100.00	372.91106; 398.92671	1.20; 100.00	34.96940; 145.95698; 161.95189; 185.95189; 211.96754; 223.96754; 372.91106; 398.92671	32.73; 23.89; 100.00; 64.19; 21.55; 39.61; 37.96; 19.38
347	89.0608	90.06807956	C4H10O2	C(CCO)CO	59.05024; 89.06080	83.82; 100.00	59.05024; 69.03459; 71.05024; 87.04515; 89.06080	50.81; 25.63; 100.00; 35.68; 32.84	41.03967; 43.01894; 57.03459; 59.05024	100.00; 41.22; 44.37; 46.41
348	197.08193	198.0892089	C10H14O4	C=CC(=O)OCCCCOC(=O)C=C	71.01385; 87.04515; 89.06080; 143.07137; 197.08193	97.55; 38.93; 38.69; 100.00; 79.50	53.00329; 68.99820; 71.01385	5.32; 10.71; 100.00	53.00329; 55.01894; 57.03459; 59.05024; 68.99820; 69.03459; 71.01385; 89.06080; 97.02950	7.57; 21.27; 9.83; 7.14; 19.29; 4.51; 100.00; 10.39; 6.11
349	201.11323	202.1205091	C10H18O4	C1C(O1)COCCCCOCC2CO2	71.01385; 71.05024; 87.04515; 89.06080; 145.08702; 169.08702; 183.10267; 201.11323	16.34; 12.00; 8.85; 15.29; 28.46; 14.98; 47.21; 100.00	55.01894; 87.04515; 89.06080; 145.08702; 183.10267; 199.09758; 201.11323	22.52; 29.27; 85.60; 12.58; 46.48; 21.42; 100.00	41.00329; 43.01894; 55.01894; 57.03459; 69.03459; 71.01385; 85.02950; 87.04515; 125.06080; 127.04007	100.00; 24.25; 28.76; 11.94; 8.81; 10.80; 16.50; 19.38; 9.38; 18.00
350	171.06628	172.0735589	C8H12O4	C1CC(CCC1C(=O)O)C(=O)O	127.07645; 171.06628	40.18; 100.00	81.07097; 127.07645; 171.06628	21.19; 100.00; 40.27	44.99820; 55.05532; 59.01385; 67.01894; 71.01385; 83.08662; 85.02950; 97.02950; 109.06589; 125.06080; 127.07645; 153.05572	100.00; 18.55; 8.89; 7.95; 5.38; 17.33; 5.29; 8.33; 4.79; 13.64; 21.19; 9.46
351	143.10775	144.1150297	C8H16O2	C1CC(CCC1CO)CO	125.09719; 143.10775	28.87; 100.00	107.08662; 123.08154; 125.09719	55.70; 81.50; 100.00	41.00329; 59.05024; 69.03459; 83.08662; 93.07097; 95.08662; 97.10227; 109.06589; 111.08154; 113.09719; 123.08154; 125.09719; 141.09210	17.92; 15.14; 7.50; 8.88; 22.95; 11.14; 9.09; 9.42; 14.91; 10.60; 100.00; 17.86; 15.12
352	161.0608	162.0680796	C10H10O2	CC(=O)C1=CC=C(C=C1)C(=O)C	119.05024; 161.06080	8.72; 100.00	119.05024; 161.06080	37.06; 100.00	41.00329; 49.00837; 67.01894; 77.03967; 93.03459; 101.03967; 115.01894; 119.05024	100.00; 33.56; 33.71; 55.95; 47.48; 19.26; 40.51; 78.06
353	237.06695	238.0742276	C14H10N2O2	C1=CC=C2C(=C1)C(=O)C3=C(C=CC(=C3C2=O)N)N	157.02950; 237.06695	1.06; 100.00	209.07204; 237.06695	3.22; 100.00	184.04040; 209.07204	100.00; 8.45
354	111.09277	112.1000484	C6H12N2	C1CN2CCN1CC2	109.07712; 111.09277	0.04; 100.00	109.07712; 111.09277	2.13; 100.00	109.07712; 111.09277	22.61; 100.00
355	232.8607	233.86798	C6H4Br2	C1=CC(=CC=C1Br)Br	206.84505; 232.86070	0.73; 100.00	206.84505; 232.86070	4.44; 100.00	78.91889; 232.86070	18.21; 100.00
356	212.892	213.89928	C4H8Br2	C(CCBr)CBr	78.91889; 212.89200	44.53; 100.00	78.91889; 212.89200	100.00; 0.52	78.91889; 212.89200	100.00; 0.01
357	172.99303	174.0003056	C8H8Cl2	CC1=CC(=C(C=C1Cl)C)Cl	137.01635; 172.99303	9.77; 100.00	34.96940; 137.01635	100.00; 6.12	34.96940; 170.97738	100.00; 0.10
358	174.97229	175.9795702	C7H6Cl2O	COC1=C(C=CC(=C1)Cl)Cl	34.96940; 174.97229	0.98; 100.00	34.96940; 174.97229	100.00; 3.91	34.96940; 55.01894	100.00; 0.71
359	144.96173	145.9690055	C6H4Cl2	C1=CC(=CC=C1Cl)Cl	118.94608; 144.96173	0.73; 100.00	118.94608; 144.96173	4.44; 100.00	34.96940; 144.96173	18.21; 100.00
360	133.10227	134.1095504	C10H14	CCC1=CC=C(C=C1)CC	105.07097; 133.10227	1.56; 100.00	117.07097; 133.10227	3.32; 100.00	63.02402; 77.03967; 89.03967; 91.05532; 105.07097; 115.05532; 117.07097; 133.10227	38.40; 78.65; 18.73; 56.46; 22.31; 30.15; 100.00; 18.26
361	203.03498	204.0422587	C11H8O4	C1=CC=C2C(=C1)C(=CC(=C2O)C(=O)O)O	159.04515; 203.03498	100.00; 71.52	159.04515; 203.03498	100.00; 16.45	55.01894; 77.03967; 129.03459; 131.05024; 157.02950; 159.04515	11.40; 100.00; 44.90; 22.36; 30.83; 11.73
362	239.03498	240.0422587	C14H8O4	C1=CC=C2C(=C1)C(=O)C3=C(C=CC(=C3C2=O)O)O	237.01933; 239.03498	0.84; 100.00	237.01933; 239.03498	3.66; 100.00	77.03967; 135.00877; 157.02950; 183.04515; 211.04007	29.49; 56.54; 100.00; 29.43; 50.27
363	161.13357	162.1408506	C12H18	CC(C)C1=CC=C(C=C1)C(C)C	159.11792; 161.13357	0.50; 100.00	159.11792; 161.13357	2.13; 100.00	43.05532; 65.03967; 77.03967; 91.05532; 103.05532; 105.07097; 117.07097; 119.08662; 129.07097; 145.10227; 159.11792; 161.13357	30.98; 26.20; 77.86; 32.75; 43.24; 42.79; 41.25; 43.06; 65.12; 100.00; 27.82; 99.00
364	155.08662	156.0939004	C12H12	CC1=CC=C(C2=CC=CC=C12)C	153.07097; 155.08662	0.89; 100.00	125.03967; 155.08662	6.06; 100.00	125.03967; 127.05532; 153.07097; 155.08662	36.90; 75.01; 43.72; 100.00
365	269.17583	270.1831093	C15H26O4	C1CCCCCC(=O)OCCOC(=O)CCCCC1	251.16527; 269.17583	2.26; 100.00	267.16018; 269.17583	18.43; 100.00	265.14453; 267.16018	56.98; 100.00
366	255.16018	256.1674592	C14H24O4	C1CCCCCC(=O)OCCOC(=O)CCCC1	237.14962; 255.16018	2.25; 100.00	253.14453; 255.16018	18.43; 100.00	251.12888; 253.14453	56.98; 100.00
367	87.04515	88.05242949	C4H8O2	C1COCCO1	43.01894; 87.04515	100.00; 86.68	43.01894; 59.01385; 87.04515	100.00; 99.92; 63.29	41.00329; 43.01894; 59.01385; 87.04515	30.52; 100.00; 29.84; 45.87
368	119.03498	120.0422587	C4H8O4	C1COC(C(O1)O)O	43.01894; 44.99820; 56.99820; 59.01385; 75.00877; 77.02442; 119.03498	35.68; 24.27; 22.04; 66.60; 100.00; 29.94; 31.60	43.01894; 44.99820; 59.01385; 75.00877; 101.02442; 119.03498	42.19; 46.62; 100.00; 57.34; 52.80; 96.38	41.00329; 43.01894; 44.99820; 59.01385	34.42; 42.36; 100.00; 70.84
369	118.99947	120.0067426	C4H8S2	C1CSCCS1	58.99609; 61.01174	100.00; 61.77	58.99609; 61.01174	100.00; 17.80	58.99609; 61.01174	100.00; 95.76
370	129.07097	130.0782503	C10H10	C=CC1=CC=C(C=C1)C=C	127.05532; 129.07097	1.83; 100.00	127.05532; 129.07097	3.07; 100.00	49.00837; 65.03967; 77.03967; 101.03967; 103.05532; 113.03967; 127.05532; 129.07097	33.11; 18.29; 21.92; 28.80; 43.16; 24.79; 100.00; 32.40
371	81.07097	82.07825032	C6H10	CC=CCC=C	79.05532; 81.07097	2.83; 100.00	79.05532; 81.07097	27.28; 100.00	51.02402; 53.03967; 55.05532; 65.03967	100.00; 32.07; 27.71; 44.72
372	157.07712	158.0843983	C10H10N2	C1=CC=C2C(=C1)C(=CC=C2N)N	77.03967; 157.07712	0.50; 100.00	127.03017; 157.07712	2.50; 100.00	77.03967; 102.03492; 104.05057; 129.04582; 155.06147	100.00; 55.43; 29.04; 17.71; 22.23
373	173.12955	174.1368278	C8H18N2O2	C1CN(CCN1CCO)CCO	155.11899; 173.12955	6.95; 100.00	111.09277; 123.09277; 125.10842; 141.10334; 155.11899; 173.12955	27.98; 17.43; 19.74; 39.07; 95.12; 100.00	40.01927; 43.01894; 58.02984; 60.04549; 70.02984; 74.06114; 85.07712; 99.09277; 100.07679; 109.07712; 111.09277; 113.10842; 123.09277; 125.07204; 125.10842	29.25; 61.78; 20.59; 35.40; 31.66; 22.87; 66.82; 36.13; 15.43; 24.67; 100.00; 95.69; 22.95; 24.48; 18.64
374	199.19282	200.2000968	C10H24N4	C1CN(CCN1CCCN)CCCN	97.07712; 199.19282	2.45; 100.00	197.17717; 199.19282	12.16; 100.00	40.01927; 42.03492; 56.05057; 69.04582; 70.06622; 83.06147; 85.07712; 99.09277; 101.10842; 113.10842; 115.12407; 125.10842; 142.13497; 197.17717	15.41; 72.95; 31.17; 20.59; 19.24; 16.87; 100.00; 23.20; 20.26; 37.76; 20.19; 17.37; 20.80; 19.94
375	161.13357	162.1408506	C12H18	C1CC=CCCC=CCCC=C1	159.11792; 161.13357	7.27; 100.00	159.11792; 161.13357	32.75; 100.00	159.11792; 161.13357	75.33; 100.00
376	107.08662	108.0939004	C8H12	C1CC=CCCC=C1	105.07097; 107.08662	3.22; 100.00	105.07097; 107.08662	11.93; 100.00	51.02402; 105.07097; 107.08662	48.39; 39.13; 100.00
377	226.90765	227.91493	C5H10Br2	C(CCBr)CCBr	78.91889; 226.90765	12.51; 100.00	78.91889; 226.90765	100.00; 3.52	78.91889; 226.90765	100.00; 0.05
378	515.1195	516.1267762	C25H24O12	C1C(C(C(CC1(C(=O)O)OC(=O)C=CC2=CC(=C(C=C2)O)O)OC(=O)C=CC3=CC(=C(C=C3)O)O)O)O	135.04515; 179.03498; 191.05611; 307.08233; 335.07724; 351.07216; 353.08781; 497.10894; 515.11950	9.81; 14.70; 7.68; 4.54; 5.50; 5.44; 40.54; 5.19; 100.00	121.02950; 123.04515; 135.04515; 173.04555; 175.06120; 177.07685; 179.03498; 189.04046; 191.05611; 193.07176; 231.05103; 267.08741; 307.08233; 309.09798; 335.07724; 337.09289; 339.10854; 349.05651; 351.07216; 353.08781; 355.10346; 393.08272; 455.09837; 457.11402; 471.09329; 473.10894; 497.10894; 515.11950	7.11; 13.80; 91.65; 12.57; 17.92; 7.71; 29.29; 11.63; 46.28; 6.24; 14.23; 6.85; 49.73; 34.02; 18.67; 8.57; 6.61; 7.12; 8.16; 100.00; 13.86; 9.53; 7.49; 7.65; 7.43; 7.78; 9.43; 31.06	123.04515; 131.01385; 133.02950; 135.04515; 141.09210; 153.01933; 173.04555; 189.04046; 191.05611; 215.05611; 219.05103; 231.05103; 247.02481; 249.04046; 251.05611; 307.08233; 309.09798; 353.08781; 357.11911; 391.06707; 393.08272; 441.08272; 445.11402; 455.09837; 457.11402; 459.12967; 471.09329; 471.12967; 473.10894; 487.12459; 497.10894	5.20; 11.27; 9.98; 100.00; 7.11; 6.98; 12.58; 5.32; 7.72; 4.05; 9.09; 5.29; 4.49; 5.05; 8.48; 9.66; 5.65; 30.69; 5.05; 4.40; 8.93; 6.51; 3.95; 8.42; 8.24; 7.39; 6.21; 11.39; 10.25; 7.74; 4.27
379	81.07097	82.07825032	C6H10	C=CCCC=C	79.05532; 81.07097	2.83; 100.00	79.05532; 81.07097	27.37; 100.00	51.02402; 53.03967; 55.05532; 65.03967	100.00; 32.05; 29.02; 50.24
380	157.07712	158.0843983	C10H10N2	C1=CC2=C(C=CC=C2N)C(=C1)N	130.06622; 157.07712	0.49; 100.00	130.06622; 157.07712	16.57; 100.00	155.06147; 157.07712	100.00; 7.62
381	103.07645	104.0837296	C5H12O2	C(CCO)CCO	85.06589; 101.06080; 103.07645	79.30; 52.96; 100.00	73.06589; 83.05024; 85.06589; 101.06080; 103.07645	14.91; 24.12; 100.00; 30.34; 42.10	43.01894; 53.03967; 55.01894; 55.05532; 57.03459; 69.03459; 71.05024; 73.06589	100.00; 34.58; 59.67; 22.81; 48.15; 32.34; 36.13; 24.44
382	240.9233	241.93058	C6H12Br2	C(CCCBr)CCBr	78.91889; 240.92330	85.04; 100.00	78.91889; 240.92330	100.00; 0.73	78.91889	100
383	153.02433	154.0316058	C6H12Cl2	C(CCCCl)CCCl	34.96940; 153.02433	41.32; 100.00	34.96940; 117.04765	100.00; 2.51	34.9694	100
384	167.0826	168.0898776	C8H12N2O2	C(CCCN=C=O)CCN=C=O	139.08769; 167.08260	100.00; 65.39	41.99854; 111.09277; 139.08769; 167.08260	100.00; 4.24; 27.56; 16.43	41.99854; 65.99854	100.00; 2.60
385	155.08662	156.0939004	C12H12	CC1=CC2=CC=CC(=C2C=C1)C	129.07097; 155.08662	0.06; 100.00	129.07097; 155.08662	3.51; 100.00	129.07097; 155.08662	20.80; 100.00
386	115.12407	116.1313485	C6H16N2	C(CCCN)CCN	113.10842; 115.12407	26.78; 100.00	113.10842; 115.12407	40.91; 100.00	16.01927; 42.03492; 44.05057; 56.05057; 58.06622; 70.06622; 72.08187; 113.10842; 115.12407	25.74; 55.33; 23.92; 15.47; 23.50; 28.93; 31.79; 39.42; 100.00
387	117.0921	118.0993797	C6H14O2	C(CCCO)CCO	99.08154; 117.09210	67.80; 100.00	71.08662; 81.07097; 97.06589; 99.08154; 117.09210	15.21; 35.57; 21.67; 100.00; 35.65	39.02402; 41.00329; 41.03967; 43.01894; 55.01894; 57.03459; 59.05024	9.20; 8.32; 23.49; 87.92; 32.76; 100.00; 18.44
388	225.11323	226.1205091	C12H18O4	C=CC(=O)OCCCCCCOC(=O)C=C	68.99820; 71.01385; 97.06589; 153.09210; 171.10267; 225.11323	13.24; 59.51; 21.84; 15.46; 38.91; 100.00	57.07097; 68.99820; 71.01385; 73.02950; 83.05024; 85.06589; 115.07645; 117.09210; 139.07645; 141.09210; 153.09210; 171.10267; 225.11323	5.24; 11.15; 100.00; 3.68; 3.56; 3.21; 6.94; 4.75; 8.47; 6.47; 5.11; 11.47; 6.13	53.00329; 55.01894; 68.99820; 71.01385; 83.05024; 87.08154; 127.07645	3.83; 11.17; 13.09; 100.00; 5.15; 4.37; 3.58
389	253.14453	254.1518092	C14H22O4	CC(=C)C(=O)OCCCCCCOC(=O)C(=C)C	85.02950; 253.14453	11.13; 100.00	41.03967; 85.02950; 115.07645; 153.09210; 155.10775; 163.07645; 165.09210; 167.10775; 185.11832; 253.14453	3.90; 100.00; 4.52; 7.06; 12.91; 12.52; 6.11; 16.27; 16.57; 20.84	41.03967; 67.05532; 71.01385; 83.05024; 85.02950; 87.04515; 111.04515	26.29; 6.34; 3.06; 2.53; 100.00; 3.38; 3.33
390	155.10775	156.1150297	C9H16O2	C1CCOC2(C1)CCCCO2	153.09210; 155.10775	13.62; 100.00	95.05024; 153.09210; 155.10775	8.68; 20.61; 100.00	41.00329; 41.03967; 43.01894; 53.03967; 57.03459; 57.07097; 69.03459; 83.05024; 95.05024; 97.02950; 97.06589; 99.04515; 113.06080; 115.07645; 127.07645; 153.09210; 155.10775	8.89; 10.45; 17.01; 10.96; 16.95; 8.83; 11.70; 22.28; 31.71; 34.81; 100.00; 31.47; 11.65; 14.99; 14.27; 23.96; 14.55
391	225.05572	226.0629942	C14H10O3	C1=CC2=CC3=C(C(=CC=C3)O)C(=C2C(=C1)O)O	197.06080; 225.05572	0.52; 100.00	197.06080; 225.05572	33.67; 100.00	197.06080; 225.05572	14.39; 100.00
392	153.12849	154.1357652	C10H18O	CC1(C2CCC(O1)(CC2)C)C	151.11284; 153.12849	0.16; 100.00	137.09719; 153.12849	0.56; 100.00	137.09719; 153.12849	12.71; 100.00
393	169.17102	170.1782987	C10H22N2	CC1(CCC(CC1)C(C)(C)N)N	167.15537; 169.17102	2.54; 100.00	152.14447; 169.17102	5.67; 100.00	56.05057; 152.14447; 169.17102	6.99; 5.75; 100.00
394	151.12407	152.1313485	C9H16N2	C1CCC2=NCCCN2CC1	149.10842; 1.7713e-05; 151.12407	4.51; 1.523e-05); 100.00	149.10842; 151.12407	10.70; 100.00	39.02402; 41.01452; 54.03492; 56.05057; 81.04582; 92.05057; 94.06622; 107.06147; 109.07712; 111.09277; 121.07712; 123.09277; 149.10842	6.65; 12.32; 8.86; 12.63; 14.05; 13.36; 12.13; 19.70; 39.17; 8.01; 10.07; 38.61; 100.00
395	177.07772	178.0849929	C8H18S2	C(CCCCS)CCCS	143.09000; 177.07772	20.17; 100.00	143.09000; 177.07772	23.35; 100.00	32.98044; 58.99609; 73.01174; 75.02739; 117.07434; 143.09000; 175.06207; 177.07772	100.00; 29.83; 14.02; 13.22; 11.96; 11.95; 28.43; 74.50
396	137.13357	138.1408506	C10H18	C=CCCCCCCC=C	111.11792; 137.13357	2.29; 100.00	121.10227; 137.13357	5.83; 100.00	49.00837; 51.02402; 53.03967; 57.07097; 63.02402; 65.03967; 67.05532; 95.08662; 107.08662; 137.13357	33.53; 41.70; 19.22; 8.81; 16.32; 100.00; 34.05; 15.06; 9.55; 14.31
397	189.14962	190.1568946	C10H22O3	CCCCOCC(C)OCC(C)O	55.01894; 57.03459; 59.05024; 73.06589; 85.06589; 113.09719	24.51; 11.58; 15.45; 19.32; 9.20; 100.00	43.01894; 57.03459; 59.05024; 71.05024; 73.06589; 75.04515; 113.09719; 115.07645; 129.09210; 131.10775; 189.14962	70.84; 38.17; 19.64; 46.04; 100.00; 21.11; 18.31; 16.35; 16.94; 33.59; 21.65	41.00329; 43.01894; 57.03459; 59.05024; 71.01385; 73.02950; 75.04515; 101.06080; 103.07645	26.78; 55.81; 65.69; 28.64; 33.60; 100.00; 69.51; 24.65; 44.76
399	244.23944	245.2467126	C13H31N3O	CC(CN(CCCN(C)C)CCCN(C)C)O	226.22887; 244.23944	18.66; 100.00	99.09277; 141.13972; 159.15029; 184.18192; 186.19757; 200.21322; 226.22887; 244.23944	4.53; 4.57; 9.91; 5.90; 22.15; 9.81; 11.87; 100.00	44.05057; 72.04549; 74.06114; 88.07679; 99.09277; 101.10842; 102.09244; 113.10842; 114.09244; 115.12407; 116.10809; 127.12407; 141.13972; 143.11899; 143.15537; 157.13464; 159.15029	12.37; 19.15; 100.00; 19.52; 25.95; 21.78; 50.26; 20.46; 10.23; 12.43; 19.72; 10.35; 32.56; 71.92; 11.26; 12.70; 32.76
400	194.09752	195.1047994	C14H13N	C1CC2=CC=CC=C2NC3=CC=CC=C31	77.03967; 194.09752	0.62; 100.00	192.08187; 194.09752	2.73; 100.00	142.06622; 144.08187; 168.08187; 192.08187; 194.09752	46.59; 63.56; 66.38; 100.00; 66.66
401	239.02692	240.0341926	C15H9ClO	C1=CC=C2C(=C1)C(=C3C=CC=CC3=C2Cl)C=O	211.03200; 239.02692	5.90; 100.00	211.03200; 239.02692	77.30; 100.00	211.03200; 239.02692	92.92; 100.00
402	167.14414	168.1514153	C11H20O	C=CCCCCCCCCC=O	149.13357; 167.14414	1.88; 100.00	43.01894; 121.10227; 125.13357; 135.11792; 139.14922; 149.13357; 165.12849; 167.14414	2.79; 4.84; 3.77; 13.88; 2.40; 5.50; 2.59; 100.00	41.00329; 43.01894; 49.00837; 51.02402; 53.00329; 53.03967; 55.01894; 57.03459; 57.07097; 63.02402; 65.00329; 65.03967; 67.01894; 67.05532; 69.03459; 71.08662; 91.05532; 93.07097; 107.08662; 109.06589; 119.08662; 121.10227; 135.11792; 167.14414	95.66; 100.00; 16.80; 39.60; 29.17; 43.62; 52.17; 54.77; 27.82; 41.10; 18.48; 51.50; 59.41; 57.75; 19.05; 49.27; 13.02; 32.26; 22.82; 15.80; 15.03; 24.01; 18.34; 17.25
403	183.13905	184.1463299	C11H20O2	C=CCCCCCCCCC(=O)O	165.12849; 183.13905	2.35; 100.00	59.01385; 95.08662; 107.08662; 111.11792; 139.14922; 165.12849; 183.13905	20.09; 3.07; 3.40; 3.43; 3.78; 5.71; 100.00	41.00329; 43.01894; 44.99820; 51.02402; 53.03967; 55.01894; 57.03459; 57.07097; 59.01385; 63.02402; 65.03967; 67.05532; 71.01385; 71.08662; 79.01894; 81.03459; 83.05024; 93.03459; 93.07097; 95.05024; 107.05024; 107.08662; 109.06589; 111.08154; 113.09719; 121.10227; 135.11792; 139.14922; 147.11792; 165.12849; 183.13905	19.48; 7.10; 93.07; 16.09; 24.27; 12.70; 6.51; 9.46; 100.00; 13.35; 31.02; 27.33; 11.01; 19.02; 12.12; 8.25; 9.30; 15.31; 15.56; 20.28; 10.58; 6.78; 18.09; 9.46; 6.52; 10.41; 6.51; 8.37; 6.58; 11.51; 10.55
404	263.1016	264.10888	C12H25BrO	C(CCCCCCBr)CCCCCO	78.91889; 263.10160	29.62; 100.00	78.91889; 263.10160	100.00; 21.04	78.91889; 261.08595	100.00; 1.55
405	277.08087	278.08814	C12H23BrO2	C(CCCCCC(=O)O)CCCCCBr	78.91889; 277.08087	28.40; 100.00	78.91889; 277.08087	100.00; 20.96	44.99820; 59.01385; 78.91889; 125.09719; 137.09719	9.25; 7.84; 100.00; 2.31; 2.12
406	299.25917	300.266445	C18H36O3	CCCCCCC(CCCCCCCCCCC(=O)O)O	281.24860; 299.25917	8.43; 100.00	59.01385; 113.09719; 155.10775; 183.13905; 185.15470; 209.19109; 213.14962; 237.25877; 255.26934; 263.23804; 281.24860; 297.24352; 299.25917	7.13; 2.21; 2.57; 2.87; 4.12; 2.50; 8.49; 3.77; 3.79; 3.10; 36.38; 3.69; 100.00	41.00329; 43.01894; 44.99820; 55.01894; 57.03459; 59.01385; 59.05024; 71.01385; 81.03459; 83.05024; 95.05024; 101.09719; 113.09719; 125.09719; 127.11284; 129.12849; 195.17544; 195.21182; 197.19109; 209.19109; 213.14962; 215.16527; 227.16527; 251.20165; 253.21730; 263.23804; 279.23295; 281.24860; 283.22787; 297.24352; 299.25917	11.82; 10.36; 100.00; 12.18; 9.09; 45.31; 18.59; 16.84; 10.77; 11.02; 9.54; 10.85; 9.86; 12.56; 13.43; 16.14; 9.17; 8.09; 8.43; 8.50; 9.48; 7.92; 9.28; 7.85; 7.45; 15.79; 11.51; 28.05; 10.35; 11.27; 16.50
407	255.19657	256.2038448	C15H28O3	C1CCCCCOCCCCOC(=O)CCCC1	237.18600; 255.19657	0.34; 100.00	253.18092; 255.19657	10.67; 100.00	251.16527; 253.18092	50.72; 100.00
408	299.20165	300.2089301	C20H28O2	CC1=C(C(CCC1)(C)C)C=CC(=CC=CC(=CC(=O)O)C)C	255.21182; 299.20165	47.07; 100.00	119.08662; 133.10227; 149.13357; 239.18052; 253.19617; 255.21182; 299.20165	7.67; 8.06; 6.84; 23.51; 15.91; 100.00; 18.27	41.00329; 65.03967; 79.05532; 103.05532; 105.07097; 119.08662; 123.04515; 147.04515; 237.16487; 239.18052	3.76; 3.48; 54.39; 8.87; 7.49; 100.00; 7.12; 6.07; 4.50; 4.74
409	283.20674	284.2140155	C20H28O	CC1=C(C(CCC1)(C)C)C=CC(=CC=CC(=CC=O)C)C	255.21182; 283.20674	100.00; 65.35	41.00329; 119.08662; 123.11792; 133.10227; 135.11792; 239.18052; 241.19617; 251.18052; 253.19617; 255.21182; 283.20674	5.21; 8.15; 4.56; 5.82; 6.28; 18.21; 32.21; 15.15; 38.85; 100.00; 29.40	41.00329; 65.00329; 65.03967; 105.03459; 105.07097; 119.08662; 123.11792; 129.03459; 129.07097; 131.05024; 131.08662; 133.10227; 145.10227; 147.11792; 185.13357; 211.14922; 235.14922; 237.16487; 239.18052	3.91; 3.67; 12.09; 4.32; 6.36; 22.68; 4.33; 3.31; 6.14; 6.94; 7.11; 4.14; 3.21; 4.53; 3.46; 3.14; 10.71; 6.05; 100.00
410	427.28538	428.2926598	C27H40O4	CCCCCC(=O)OC1(CCC2C1(CCC3C2CCC4=CC(=O)CCC34C)C)C(=O)C	97.06589; 385.27482; 427.28538	9.11; 4.67; 100.00	41.00329; 43.01894; 59.01385; 79.05532; 91.01894; 93.03459; 97.06589; 107.01385; 111.04515; 115.07645; 269.19109; 287.20165; 309.18600; 311.20165; 313.18092; 313.21730; 319.26425; 327.19657; 329.21222; 427.28538	29.56; 21.30; 74.48; 23.46; 20.37; 64.29; 47.21; 23.25; 55.78; 37.59; 21.00; 21.64; 24.50; 25.09; 26.75; 23.83; 34.47; 18.51; 62.59; 100.00	41.00329; 43.01894; 53.00329; 55.01894; 57.03459; 59.01385; 63.02402; 65.03967; 67.01894; 71.01385; 71.05024; 71.08662; 79.05532; 81.07097; 85.02950; 87.04515; 95.05024; 97.06589; 99.04515; 285.18600; 297.18600; 313.18092; 313.21730	77.90; 15.81; 12.68; 38.93; 100.00; 21.43; 13.29; 17.63; 15.98; 19.98; 22.26; 12.40; 27.53; 13.51; 18.92; 13.19; 12.87; 34.22; 48.50; 17.54; 8.62; 20.20; 10.48
411	271.17035	272.17763	C18H24O2	CC12CCC3C(C1CCC2O)CCC4=C3C=CC(=C4)O	269.15470; 271.17035	6.65; 100.00	253.15979; 271.17035; 0.39655	18.79; 100.00; 0.34527	195.11792; 211.11284; 213.12849; 225.16487; 227.14414; 229.15979; 235.14922; 241.15979; 245.15470; 251.14414; 253.15979; 255.13905; 269.15470; 271.17035	4.39; 9.88; 17.04; 6.37; 5.74; 6.69; 21.21; 11.27; 11.04; 19.83; 51.20; 6.33; 100.00; 22.23
412	295.17035	296.17763	C20H24O2	CC12CCC3C(C1CCC2(C#C)O)CCC4=C3C=CC(=C4)O	277.15979; 295.17035	1.52; 100.00	293.15470; 295.17035	40.25; 100.00	93.03459; 97.06589; 107.05024; 117.03459; 119.05024; 121.06589; 123.08154; 159.08154; 211.11284; 213.12849; 251.14414; 263.14414; 265.12340; 267.13905; 269.15470; 279.13905; 293.15470; 295.17035	70.65; 18.89; 33.40; 16.15; 100.00; 59.72; 12.59; 13.13; 13.98; 13.76; 9.92; 9.35; 45.33; 35.55; 33.71; 11.89; 50.59; 20.01
413	329.21222	330.2194948	C21H30O3	CC(=O)C1(CCC2C1(CCC3C2CCC4=CC(=O)CCC34C)C)O	285.18600; 329.21222	20.47; 100.00	269.19109; 285.18600; 287.20165; 311.16527; 313.18092; 329.21222	15.83; 17.84; 56.59; 47.61; 18.37; 100.00	227.14414; 229.15979; 255.17544; 257.19109; 259.17035; 267.17544; 269.19109; 271.17035; 281.15470; 283.17035; 285.18600; 287.20165; 295.17035; 313.18092; 327.19657; 329.21222	19.90; 38.55; 11.99; 21.33; 17.05; 30.84; 21.87; 37.26; 25.05; 57.13; 100.00; 56.06; 13.07; 12.57; 13.16; 25.43
414	269.1547	270.1619799	C18H22O2	CC12C=CC3=C4CCC(=O)C=C4CCC3C1CCC2O	267.13905; 269.15470	6.55; 100.00	251.14414; 269.15470; 0.4706	12.03; 100.00; 0.46625	41.00329; 57.03459; 197.13357; 209.09719; 211.11284; 213.12849; 223.11284; 225.12849; 233.13357; 239.10775; 239.14414; 241.12340; 243.13905; 249.12849; 251.14414; 253.12340; 267.13905; 269.15470	15.10; 12.78; 11.80; 12.43; 13.15; 19.66; 10.76; 19.80; 16.49; 16.01; 11.68; 13.67; 12.94; 15.90; 55.85; 17.15; 100.00; 19.08
415	301.2173	302.2245802	C20H30O2	CC12CCC(=O)C=C1CCC3C2CCC4(C3CCC4(C)O)C	283.20674; 301.21730	0.49; 100.00	299.20165; 301.21730	2.36; 100.00	255.17544; 257.19109; 259.20674; 283.17035; 283.20674; 285.18600; 297.18600; 299.20165; 301.21730	18.38; 31.36; 9.89; 8.32; 6.98; 12.72; 23.21; 100.00; 42.23
416	149.07204	150.0793129	C8H10N2O	CC(=O)NNC1=CC=CC=C1	107.06147; 149.07204	28.01; 100.00	43.01894; 77.03967; 107.06147	82.85; 78.68; 100.00	29.01452; 41.00329; 43.01894; 58.02984; 64.01927; 77.03967; 81.04582; 91.03017; 105.04582; 107.06147; 121.04074	33.31; 55.74; 10.21; 16.26; 13.09; 100.00; 6.95; 14.26; 31.81; 48.37; 9.00
417	377.87708	378.88435	C14H7Br2NO2	C1=CC=C2C(=C1)C(=O)C3=C(C2=O)C(=C(C=C3Br)Br)N	350.86618; 377.87708	0.08; 100.00	273.95091; 377.87708	1.31; 100.00	157.02950; 219.84030; 377.87708	22.46; 11.62; 100.00
418	236.0717	237.0789786	C15H11NO2	CC1=C(C2=C(C=C1)C(=O)C3=CC=CC=C3C2=O)N	234.05605; 236.07170	7.06; 100.00	208.07679; 236.07170	15.84; 100.00	104.05057; 132.04549; 157.02950; 181.02950; 183.04515; 208.04040; 208.07679; 210.05605; 234.05605; 236.07170; 0.030357	24.48; 29.54; 17.36; 100.00; 22.93; 18.63; 85.70; 21.39; 59.17; 34.86; 0.024476)
419	74.06114	75.06841391	C3H9NO	CC(CN)O	57.03459; 74.06114	4.65; 100.00	43.01894; 57.03459; 74.06114	16.29; 56.34; 100.00	43.01894; 57.03459; 58.02984; 72.04549; 74.06114	77.48; 55.28; 45.26; 24.46; 100.00
420	379.92338	380.93066	C14H8BrNO5S	C1=CC=C2C(=C1)C(=O)C3=C(C=C(C(=C3C2=O)N)S(=O)(=O)O)Br	299.96656; 379.92338	1.07; 100.00	299.96656; 379.92338	3.49; 100.00	78.91889; 299.96656	57.97; 100.00
421	161.0608	162.0680796	C10H10O2	CC(=O)CC(=O)C1=CC=CC=C1	119.05024; 161.06080	65.45; 100.00	41.00329; 119.05024	100.00; 16.08	41.00329; 57.03459; 77.03967; 143.05024	81.16; 16.84; 100.00; 15.39
422	198.9764	199.98368	C8H9BrO	C1=CC=C(C=C1)OCCBr	93.03459; 104.93454	100.00; 41.12	78.91889; 93.03459	37.51; 100.00	78.91889; 93.03459	89.28; 100.00
423	238.92284	239.93012	C5H6BrClN2O2	CC1(C(=O)N(C(=O)N1Br)Cl)C	118.00652; 238.92284	1.31; 100.00	118.00652; 238.92284	17.58; 100.00	77.97521; 78.91889; 118.00652; 161.95600; 170.89663; 222.89154; 238.92284	38.80; 16.57; 100.00; 25.98; 25.54; 13.30; 25.82
424	184.96075	185.96803	C7H7BrO	COC1=CC(=CC=C1)Br	78.91889; 184.96075	26.03; 100.00	78.91889; 154.95019	100.00; 3.81	78.91889; 154.95019	100.00; 18.75
425	168.94251	169.94979	C4H8BrCl	C(CCBr)CCl	34.96940; 168.94251	33.66; 100.00	34.96940; 78.91889	100.00; 6.73	34.96940; 78.91889	85.49; 100.00
426	182.98149	183.98876	C8H9Br	CCC1=CC=C(C=C1)Br	78.91889; 182.98149	6.94; 100.00	78.91889; 182.98149	89.70; 100.00	78.91889; 154.95019	100.00; 12.34
427	172.94076	173.94804	C6H4BrF	C1=CC(=CC=C1F)Br	146.92511; 172.94076	2.77; 100.00	146.92511; 172.94076	2.17; 100.00	78.91889; 172.94076	34.24; 100.00
428	198.9764	199.98368	C8H9BrO	CC1=C(C=CC(=C1)OC)Br	78.91889; 198.97640	100.00; 6.51	78.91889; 168.96584	100.00; 0.88	78.91889; 168.96584	100.00; 0.13
429	247.10669	248.11396	C12H25Br	CCCCCCCCCCCCBr	78.91889; 247.10669	28.73; 100.00	78.91889; 247.10669	100.00; 22.73	71.08662; 78.91889	1.89; 100.00
431	317.18494	318.19221	C17H35Br	CCCCCCCCCCCCCCCCCBr	78.91889; 317.18494	28.83; 100.00	78.91889; 317.18494	100.00; 22.80	78.91889; 317.18494	100.00; 1.55
432	303.16929	304.17656	C16H33Br	CCCCCCCCCCCCCCCCBr	78.91889; 303.16929	28.83; 100.00	78.91889; 303.16929	100.00; 22.79	78.91889; 303.16929	100.00; 1.55
433	163.01279	164.02006	C6H13Br	CCCCCCBr	83.08662; 163.01279	3.21; 100.00	78.91889; 163.01279	100.00; 4.08	78.91889; 92.93454	100.00; 0.20
434	191.04409	192.05136	C8H17Br	CCCCCCCCBr	78.91889; 191.04409	27.06; 100.00	78.91889; 189.02844	100.00; 25.35	71.08662; 78.91889	0.33; 100.00
435	289.15364	290.16091	C15H31Br	CCCCCCCCCCCCCCCBr	78.91889; 289.15364	28.83; 100.00	78.91889; 289.15364	100.00; 22.81	78.91889; 289.15364	100.00; 1.54
436	148.99714	150.00441	C5H11Br	CCCCCBr	78.91889; 148.99714	12.40; 100.00	78.91889; 148.99714	100.00; 0.11	78.91889	100
437	120.96584	121.97311	C3H7Br	CCCBr	41.03967; 120.96584	15.41; 100.00	78.91889; 120.96584	100.00; 3.13	78.91889; 120.96584	100.00; 2.88
438	275.13799	276.14526	C14H29Br	CCCCCCCCCCCCCCBr	78.91889; 275.13799	28.79; 100.00	78.91889; 275.13799	100.00; 22.81	78.91889; 275.13799	100.00; 1.53
439	261.12234	262.12961	C13H27Br	CCCCCCCCCCCCCBr	78.91889; 261.12234	28.81; 100.00	78.91889; 261.12234	100.00; 22.73	78.91889; 261.12234	100.00; 1.47
440	233.09104	234.09831	C11H23Br	CCCCCCCCCCCBr	78.91889; 233.09104	28.79; 100.00	78.91889; 233.09104	100.00; 22.68	71.08662; 78.91889	1.56; 100.00
441	89.04305	90.05032149	C4H10S	CCCCS	87.02739; 89.04304	9.19; 100.00	87.02739; 89.04304	100.00; 65.03	32.98044; 58.99609	100.00; 8.49
442	73.06589	74.07316494	C4H10O	CCCCO	71.05024; 73.06589	6.36; 100.00	71.05024; 73.06589	100.00; 41.74	43.01894; 55.05532; 57.03459; 73.06589	100.00; 47.05; 11.51; 11.17
443	215.12888	216.1361591	C11H20O4	CCCCOC(=O)C(C)OC(=O)CCC	43.01894; 69.03459; 71.01385; 73.06589; 87.00877; 87.04515; 145.08702; 215.12888	14.74; 20.15; 12.02; 28.28; 9.03; 55.96; 94.84; 100.00	43.01894; 55.01894; 69.03459; 71.01385; 73.02950; 87.00877; 87.04515; 113.06080; 115.07645; 125.06080; 129.09210; 145.08702	59.29; 34.86; 25.26; 46.25; 100.00; 10.80; 43.62; 8.74; 10.93; 19.72; 11.04; 14.42	43.01894; 59.01385; 69.03459; 87.04515	7.69; 6.72; 100.00; 13.66
444	131.10775	132.1150297	C7H16O2	CCCCOCC(C)O	57.03459; 73.02950; 73.06589; 131.10775	22.65; 30.02; 94.16; 100.00	43.01894; 57.03459; 59.05024; 71.05024; 73.06589; 129.09210; 131.10775	24.93; 30.38; 14.45; 53.12; 100.00; 17.69; 28.06	43.01894; 55.01894; 57.03459; 73.02950	100.00; 15.82; 27.37; 9.10
445	176.96796	177.9752337	C7H5Cl2F	C1=CC(=C(C(=C1)Cl)CCl)F	90.97563; 176.96796	0.52; 100.00	114.97563; 176.96796	3.94; 100.00	34.96940; 114.97563; 176.96796	8.43; 8.81; 100.00
446	140.91121	141.91849	C2H4BrCl	C(CBr)Cl	60.98505; 78.91889	46.88; 100.00	34.96940; 78.91889	93.05; 100.00	34.96940; 78.91889	13.67; 100.00
447	178.98809	179.9953623	C7H4ClF3	C1=CC(=CC=C1C(F)(F)F)Cl	152.97244; 178.98809	0.06; 100.00	152.97244; 178.98809	7.13; 100.00	34.96940; 178.98809	3.58; 100.00
448	91.032	92.039278	C4H9Cl	CCCCCl	89.01635; 91.03200	4.32; 100.00	34.96940; 91.03200	100.00; 3.11	34.96940; 55.05532	100.00; 0.22
449	175.1259	176.1331784	C10H21Cl	CCCCCCCCCCCl	34.96940; 175.12590	11.55; 100.00	34.96940; 175.12590	16.87; 100.00	34.96940; 175.12590	100.00; 6.68
450	203.1572	204.1644785	C12H25Cl	CCCCCCCCCCCCCl	34.96940; 203.15720	49.22; 100.00	34.96940; 203.15720	100.00; 48.07	34.96940; 203.15720	100.00; 3.15
451	161.01635	162.0236279	C10H7Cl	C1=CC=C2C(=C1)C=CC=C2Cl	77.03967; 161.01635	0.10; 100.00	111.00070; 161.01635	0.63; 100.00	135.00070; 161.01635	19.18; 100.00
452	161.11025	162.1175283	C9H19Cl	CCCCCCCCCCl	34.96940; 161.11025	18.74; 100.00	34.96940; 161.11025	100.00; 8.93	34.96940; 71.08662	100.00; 1.12
453	147.0946	148.1018782	C8H17Cl	CCCCCCCCCl	34.96940; 147.09460	29.31; 100.00	34.96940; 145.07895; 147.09460	100.00; 67.76; 29.95	34.96940; 71.08662	100.00; 0.84
454	133.04257	134.0498427	C6H11ClO	CC(C)(C)C(=O)CCl	57.07097; 133.04257	0.22; 100.00	34.96940; 133.04257	19.52; 100.00	74.96432; 117.01127	100.00; 29.54
455	90.99562	92.0028925	C3H5ClO	CC(=O)CCl	41.00329; 90.99562	5.00; 100.00	41.00329; 90.99562	29.75; 100.00	41.00329; 90.99562	73.17; 100.00
456	231.1885	232.1957786	C14H29Cl	CCCCCCCCCCCCCCCl	34.96940; 231.18850	49.28; 100.00	34.96940; 231.18850	100.00; 48.22	34.96940; 231.18850	100.00; 3.49
457	127.11284	128.1201151	C8H16O	CC(C1CCCCC1)O	109.10227; 127.11284	62.51; 100.00	109.10227; 127.11284	100.00; 30.21	43.01894; 45.03459; 79.05532; 83.08662; 93.07097; 97.06589; 107.08662; 109.06589; 109.10227; 111.08154; 125.09719; 127.11284	100.00; 25.12; 18.97; 24.66; 33.32; 18.29; 40.44; 16.64; 38.60; 32.90; 18.63; 34.55
458	166.12374	167.1310142	C10H17NO	C1CCC(CC1)N2CCCC2=O	148.11317; 166.12374	4.46; 100.00	66.03492; 67.01894; 84.04549; 94.06622; 96.08187; 98.09752; 148.11317; 166.12374	7.73; 4.28; 8.28; 5.24; 28.42; 4.72; 6.18; 100.00	41.00329; 41.99854; 42.03492; 56.05057; 66.03492; 79.05532; 81.07097; 82.02984; 83.08662; 84.04549; 92.05057; 94.06622; 110.09752; 138.09244; 138.12882	18.26; 53.01; 18.60; 16.86; 100.00; 10.98; 23.24; 28.96; 14.29; 21.97; 29.45; 29.36; 11.86; 22.54; 14.52
459	156.17577	157.1830497	C10H23N	CCCCCCCCCCN	154.16012; 156.17577	8.44; 100.00	154.16012; 156.17577	8.98; 100.00	42.03492; 53.03967; 54.03492; 56.05057; 57.07097; 67.05532; 68.05057; 70.06622; 71.08662; 85.10227; 86.09752; 97.10227; 98.09752; 99.11792; 111.11792; 112.11317; 113.13357; 114.12882; 126.12882; 156.17577	85.39; 16.31; 11.15; 10.41; 35.94; 25.82; 9.01; 24.34; 46.21; 10.74; 9.43; 9.54; 10.63; 10.42; 12.46; 15.38; 8.48; 10.26; 16.03; 100.00
460	157.15979	158.1670653	C10H22O	CCCCCCCCCCO	155.14414; 157.15979	8.39; 100.00	155.14414; 157.15979	8.84; 100.00	41.03967; 43.01894; 53.03967; 55.01894; 55.05532; 57.03459; 57.07097; 59.05024; 67.05532; 71.05024; 71.08662; 85.10227; 97.10227; 99.11792; 111.11792; 125.13357; 127.14922; 139.14922; 157.15979	23.88; 100.00; 31.72; 41.47; 22.36; 61.89; 57.27; 17.96; 56.65; 14.05; 69.83; 20.75; 28.15; 23.28; 13.01; 15.68; 26.78; 14.40; 69.92
461	139.14922	140.1565006	C10H20	CCCCCCCCC=C	113.13357; 139.14922	1.22; 100.00	123.11792; 139.14922	10.28; 100.00	51.02402; 53.03967; 57.07097; 65.03967; 67.05532; 69.07097; 81.07097; 85.10227; 95.08662; 109.10227; 139.14922	43.30; 33.68; 22.11; 47.67; 100.00; 17.09; 16.14; 25.37; 20.57; 20.68; 48.31
462	325.34759	326.3548661	C22H46O	CCCCCCCCCCCCCCCCCCCCCCO	323.33194; 325.34759	8.53; 100.00	323.33194; 325.34759	9.43; 100.00	41.03967; 43.01894; 55.01894; 57.03459; 57.07097; 59.05024; 71.08662; 99.11792; 113.13357; 125.13357; 127.11284; 139.14922; 141.12849; 197.22747; 223.24312; 237.25877; 239.23804; 251.27442; 253.25369; 253.29007; 265.29007; 267.26934; 267.30572; 269.28499; 281.28499; 293.32137; 295.30064; 295.33702; 307.33702; 323.33194; 325.34759	7.48; 34.33; 10.94; 15.78; 9.40; 6.48; 16.93; 5.23; 5.29; 7.21; 4.95; 5.13; 5.07; 4.87; 9.45; 7.70; 10.00; 15.01; 11.76; 8.00; 11.77; 13.10; 8.04; 5.86; 7.79; 10.18; 7.84; 7.98; 20.75; 7.56; 100.00
463	184.20707	185.2143499	C12H27N	CCCCCCCCCCCCN	182.19142; 184.20707	8.43; 100.00	182.19142; 184.20707	9.02; 100.00	42.03492; 53.03967; 56.05057; 57.07097; 67.05532; 70.06622; 71.08662; 85.10227; 97.10227; 99.11792; 111.11792; 112.11317; 114.12882; 125.13357; 126.12882; 127.14922; 128.14447; 139.14922; 140.14447; 142.16012; 184.20707	33.74; 12.56; 8.36; 31.80; 22.47; 8.87; 41.40; 11.71; 9.29; 18.89; 13.55; 14.11; 8.03; 11.35; 20.71; 21.61; 10.04; 9.01; 9.25; 7.81; 100.00
464	201.16825	202.175522	C12H26S	CCCCCCCCCCCCS	199.15260; 201.16825	8.44; 100.00	199.15260; 201.16825	9.04; 100.00	32.98044; 57.07097; 58.99609; 67.05532; 70.99609; 71.08662; 73.01174; 75.02739; 97.10227; 99.11792; 111.11792; 113.13357; 125.13357; 127.14922; 129.07434; 143.09000; 145.10565; 157.10565; 201.16825	100.00; 24.55; 45.92; 15.69; 15.50; 26.60; 24.07; 14.25; 8.33; 12.30; 10.40; 8.97; 12.08; 18.65; 13.72; 26.47; 12.73; 10.88; 93.51
465	185.19109	186.1983654	C12H26O	CCCCCCCCCCCCO	183.17544; 185.19109	8.49; 100.00	183.17544; 185.19109	9.26; 100.00	43.01894; 53.03967; 55.01894; 57.03459; 57.07097; 67.05532; 71.08662; 85.10227; 97.10227; 99.11792; 111.11792; 113.09719; 113.13357; 125.13357; 127.11284; 127.14922; 129.12849; 139.14922; 141.12849; 167.18052; 185.19109	62.89; 24.66; 30.61; 40.92; 44.30; 44.95; 60.83; 18.68; 14.88; 21.99; 21.60; 12.97; 18.75; 27.00; 22.31; 27.36; 13.08; 12.20; 15.92; 15.02; 100.00
466	167.18052	168.1878008	C12H24	CCCCCCCCCCC=C	165.16487; 167.18052	2.05; 100.00	165.16487; 167.18052	4.55; 100.00	51.02402; 53.03967; 57.07097; 65.03967; 67.05532; 71.08662; 85.10227; 95.08662; 109.10227; 111.11792; 113.13357; 123.11792; 125.13357; 127.14922; 137.13357; 167.18052	28.59; 46.20; 41.62; 61.61; 48.61; 50.41; 22.70; 47.53; 43.33; 18.92; 38.28; 34.49; 21.63; 18.79; 28.67; 100.00
467	252.23329	253.2405646	C16H31NO	CCCCCCCCCCCCN1CCCC1=O	84.04549; 252.23329	4.28; 100.00	82.02984; 84.04549; 153.16487; 155.18052; 182.19142; 184.20707; 252.23329	6.07; 3.93; 5.14; 7.36; 4.34; 3.42; 100.00	41.00329; 42.03492; 43.05532; 52.01927; 57.07097; 66.03492; 67.01894; 67.05532; 71.08662; 80.01419; 82.02984; 84.04549; 92.05057; 98.06114; 99.11792; 108.04549; 110.06114; 112.07679; 113.13357; 125.13357; 126.09244; 138.09244; 153.16487; 165.16487; 180.13939; 182.19142; 184.20707; 210.22272; 224.23837; 250.21764; 252.23329	29.69; 25.35; 13.65; 14.73; 13.14; 100.00; 26.41; 32.26; 37.69; 15.27; 54.12; 94.00; 30.76; 31.25; 22.92; 12.16; 39.64; 35.69; 15.88; 12.39; 20.25; 23.30; 15.93; 17.89; 12.17; 64.12; 51.53; 12.03; 12.93; 19.11; 36.97
468	103.07645	104.0837296	C5H12O2	CCOCC(C)O	45.03459; 57.03459; 75.04515; 103.07645	100.00; 88.68; 53.19; 50.33	43.01894; 45.03459; 57.03459; 83.05024; 85.06589	100.00; 92.81; 54.24; 71.46; 54.28	43.01894; 55.01894; 57.03459	100.00; 13.36; 21.21
469	116.04655	117.0538265	C3H7N3O2	CCN(C(=O)N)N=O	41.99854; 42.03492; 73.04074	47.03; 100.00; 51.56	41.99854; 42.03492; 45.00944; 73.04074	100.00; 79.16; 14.63; 17.77	41.99854; 42.03492	100.00; 6.76
470	112.07679	113.084064	C6H11NO	CCN1CCCC1=O	84.04549; 112.07679	19.01; 100.00	42.03492; 82.02984; 84.04549; 94.06622; 112.07679	54.84; 15.77; 22.70; 28.91; 100.00	40.01927; 41.00329; 41.99854; 42.03492; 44.05057; 67.01894; 72.04549; 82.02984; 112.07679	10.52; 34.06; 54.29; 100.00; 8.33; 10.06; 7.31; 6.85; 7.93
471	127.12407	128.1313485	C7H16N2	CCN1CCCC1CN	42.03492; 127.12407	30.50; 100.00	42.03492; 94.06622; 96.08187; 98.09752; 127.12407	67.09; 9.08; 12.85; 12.32; 100.00	40.01927; 42.03492; 44.05057; 66.03492; 68.05057; 70.06622; 80.05057; 97.07712; 99.09277	25.69; 100.00; 10.13; 13.50; 13.85; 8.61; 11.94; 36.00; 17.52
472	123.08154	124.088815	C8H12O	C#CC1(CCCCC1)O	105.07097; 123.08154	15.28; 100.00	93.03459; 97.06589; 105.07097; 123.08154	42.22; 10.60; 35.11; 100.00	51.02402; 69.03459; 77.03967; 93.03459; 95.05024; 97.06589; 105.07097	37.46; 20.75; 13.43; 100.00; 44.02; 39.12; 13.95
473	146.06114	147.0684139	C9H9NO	C1=CN(C=C1)CC2=CC=CO2	94.02984; 146.06114	0.40; 100.00	90.03492; 92.01419; 118.06622; 128.05057; 146.06114	6.08; 5.19; 11.43; 16.75; 100.00	49.00837; 51.02402; 66.03492; 67.01894; 78.03492; 88.01927; 90.03492; 92.01419; 94.02984; 102.03492; 106.02984; 114.03492; 128.05057	28.56; 17.32; 84.44; 17.08; 24.68; 39.84; 88.87; 34.01; 41.43; 16.78; 21.92; 65.63; 100.00
474	372.91413	373.9214	C6H4F9I	C(CI)C(C(C(C(F)(F)F)(F)F)(F)F)(F)F	352.90790; 372.91413	10.38; 100.00	218.98618; 372.91413	6.46; 100.00	352.90790; 372.91413	3.75; 100.00
475	472.90774	473.91501	C8H4F13I	C(CI)C(C(C(C(C(C(F)(F)F)(F)F)(F)F)(F)F)(F)F)(F)F	452.90151; 472.90774	12.93; 100.00	452.90151; 472.90774	7.71; 100.00	452.90151; 472.90774	4.24; 100.00
476	216.97786	217.9851378	C10H2O6	C1=C2C(=CC3=C1C(=O)OC3=O)C(=O)OC2=O	216.97786	100	216.97786	100	216.97786	100
477	197.02442	198.031694	C12H6O3	C1=CC2=C3C(=C1)C(=O)OC(=O)C3=CC=C2	197.02442	100	197.02442	100	197.02442	100
478	68.02542	69.03269711	C2H3N3	C1=NC=NN1	41.01452; 68.02542	18.01; 100.00	41.01452; 68.02542	46.17; 100.00	41.01452; 66.00977; 0	100.00; 42.37; 68.0254206439
479	196.0404	197.0476785	C12H7NO2	C1=CC2=C3C(=C1)C(=O)NC(=O)C3=CC=C2	196.0404	100	41.99854; 196.04040	9.71; 100.00	41.99854; 196.04040	96.90; 100.00
480	115.11284	116.1201151	C7H16O	CCCCCCCO	85.10227; 115.11284	2.61; 100.00	97.10227; 113.09719; 115.11284	28.70; 61.92; 100.00	41.00329; 41.03967; 43.01894; 55.01894; 57.03459; 59.05024; 71.08662	6.04; 18.69; 100.00; 8.25; 41.36; 8.11; 8.51
481	241.25369	242.2609657	C16H34O	CCCCCCCCCCCCCCCCO	239.23804; 241.25369	8.51; 100.00	239.23804; 241.25369	9.35; 100.00	41.03967; 43.01894; 53.03967; 55.01894; 57.03459; 57.07097; 59.05024; 67.05532; 71.08662; 99.11792; 111.11792; 113.13357; 125.13357; 127.11284; 127.14922; 139.14922; 141.12849; 141.16487; 153.16487; 167.18052; 169.15979; 169.19617; 181.19617; 183.17544; 183.21182; 209.22747; 211.20674; 211.24312; 223.24312; 239.23804; 241.25369	7.52; 37.90; 6.83; 14.10; 15.89; 15.60; 7.64; 12.74; 23.08; 9.44; 7.14; 10.24; 10.57; 6.67; 32.81; 10.34; 8.84; 7.54; 7.73; 11.86; 11.81; 6.36; 9.42; 7.28; 6.19; 8.27; 7.87; 7.00; 17.14; 7.10; 100.00
482	223.24313	224.250401	C16H32	CCCCCCCCCCCCCCC=C	221.22747; 223.24312	2.05; 100.00	221.22747; 223.24312	4.53; 100.00	57.07097; 65.03967; 67.05532; 71.08662; 99.11792; 109.10227; 113.13357; 121.10227; 123.11792; 125.13357; 127.14922; 137.13357; 139.14922; 141.16487; 151.14922; 153.16487; 165.16487; 169.19617; 193.19617; 221.22747; 223.24312	13.44; 16.94; 13.53; 30.21; 13.22; 14.26; 17.75; 18.00; 15.97; 12.32; 24.44; 26.96; 10.70; 21.17; 25.95; 17.61; 27.79; 17.25; 17.13; 13.92; 100.00
483	101.09719	102.1044651	C6H14O	CCCCCCO	99.08154; 101.09719	4.52; 100.00	83.08662; 99.08154; 101.09719	32.78; 100.00; 77.93	41.03967; 43.01894; 53.03967; 55.01894; 55.05532; 57.03459; 71.08662; 101.09719	13.70; 100.00; 7.60; 10.40; 6.31; 36.71; 10.14; 7.58
484	83.08662	84.09390038	C6H12	CCCCC=C	81.07097; 83.08662	2.39; 100.00	81.07097; 83.08662	32.60; 100.00	53.03967; 57.07097; 83.08662	100.00; 16.89; 33.85
485	115.05532	116.0626003	C9H8	C1C=CC2=CC=CC=C21	65.03967; 115.05532	1.00; 100.00	65.03967; 115.05532	3.28; 100.00	65.03967; 115.05532	17.84; 100.00
486	127.02615	128.0334254	C3H4N4O2	C1=NN=NN1CC(=O)O	83.03632; 127.02615	100.00; 29.87	56.02542; 72.00910; 83.03632	17.03; 17.98; 100.00	26.00362; 56.02542; 72.00910	68.89; 100.00; 17.27
487	134.03599	135.0432618	C6H5N3O	C1=CC=C2C(=C1)N=NN2O	29.99854; 134.03599	0.27; 100.00	29.99854; 134.03599	1.34; 100.00	29.99854; 134.03599	20.14; 100.00
488	217.06589	218.0731649	C16H10O	C1=CC2=C3C(=C1)C=CC4=C(C=CC(=C43)C=C2)O	189.07097; 217.06589	0.18; 100.00	189.07097; 217.06589	2.67; 100.00	189.07097; 217.06589	100.00; 64.01
489	411.32685	412.3341306	C28H44O2	CC(C)C(C)C=CC(C)C1CCC2C1(CCCC2=CC=C3CC(CC(C3=C)O)O)C	153.09210; 411.32685; 0.01467	7.43; 100.00; 0.0031982	41.00329; 43.01894; 125.06080; 127.07645; 135.08154; 153.09210; 323.27442; 325.29007; 327.30572; 335.27442; 337.29007; 339.30572; 365.32137; 367.30064; 369.31629; 381.31629; 383.33194; 393.31629; 411.32685	4.93; 20.12; 16.36; 12.01; 6.67; 13.55; 3.94; 6.26; 3.68; 3.86; 12.35; 10.90; 3.44; 10.55; 5.61; 7.54; 7.83; 23.32; 100.00	43.01894; 83.05024; 109.06589; 121.06589; 123.04515; 123.08154; 125.06080; 127.07645; 133.06589; 135.08154; 151.07645; 261.25877; 273.25877; 285.25877; 321.25877; 323.27442; 325.29007; 335.27442; 337.29007; 339.30572; 341.28499; 349.29007; 365.28499; 367.30064; 369.31629; 375.30572; 379.30064; 381.31629; 393.31629; 409.31120; 411.32685	55.20; 19.12; 97.94; 46.02; 16.44; 23.76; 66.74; 55.13; 15.82; 27.49; 28.10; 18.66; 29.97; 24.97; 20.37; 33.91; 36.03; 26.89; 93.41; 37.61; 41.23; 23.92; 24.97; 100.00; 25.27; 37.17; 18.77; 44.41; 31.92; 85.90; 40.00
490	295.09282	296.1001	C12H25I	CCCCCCCCCCCCI	293.07717; 295.09282	8.43; 100.00	126.90502; 295.09282	9.26; 100.00	53.03967; 57.07097; 67.05532; 71.08662; 97.10227; 99.11792; 111.11792; 125.13357; 126.90502; 127.14922; 139.14922; 222.99892; 237.01457; 239.03022; 295.09282	6.86; 19.21; 15.92; 30.92; 8.58; 7.12; 7.44; 11.67; 100.00; 20.05; 5.66; 7.88; 10.90; 9.12; 55.56
491	351.15542	352.1627	C16H33I	CCCCCCCCCCCCCCCCI	349.13977; 351.15542	8.45; 100.00	126.90502; 351.15542	9.24; 100.00	57.07097; 67.05532; 71.08662; 113.13357; 125.13357; 126.90502; 127.14922; 139.14922; 153.16487; 167.18052; 181.19617; 183.21182; 209.22747; 222.99892; 223.24312; 237.01457; 265.04587; 279.06152; 281.07717; 293.07717; 321.10847; 349.13977; 351.15542	7.03; 4.51; 7.07; 5.43; 5.22; 100.00; 21.19; 6.30; 5.48; 5.95; 8.36; 6.11; 4.97; 4.39; 4.59; 4.03; 4.59; 5.67; 4.02; 4.78; 4.70; 5.16; 82.59
492	210.99892	212.0062	C6H13I	CCCCCCI	208.98327; 210.99892	1.89; 100.00	208.98327; 210.99892	61.07; 100.00	126.90502; 210.99892	100.00; 21.77
493	253.04587	254.05315	C9H19I	CCCCCCCCCI	251.03022; 253.04587	4.91; 100.00	126.90502; 253.04587	25.89; 100.00	53.03967; 55.05532; 57.07097; 67.05532; 71.08662; 83.08662; 85.10227; 111.11792; 126.90502; 166.93632; 222.99892; 253.04587	6.53; 4.61; 11.12; 12.77; 11.76; 5.45; 5.85; 4.98; 100.00; 7.77; 4.53; 33.94
494	89.0608	90.06807956	C4H10O2	CC(COC)O	57.03459; 89.06080	55.79; 100.00	43.01894; 55.01894; 57.03459; 71.05024; 89.06080	42.22; 36.26; 87.34; 100.00; 50.46	43.01894; 55.01894	100.00; 51.55
495	131.07137	132.0786442	C6H12O3	CC(COC)OC(=O)C	41.03967; 57.03459; 59.01385; 71.05024	18.61; 27.02; 56.16; 100.00	55.01894; 57.03459; 59.01385; 71.05024	6.83; 6.74; 100.00; 20.88	41.00329; 59.01385; 71.05024	39.35; 100.00; 9.15
496	88.07679	89.08406397	C4H11NO	CC(COC)N	56.05057; 88.07679	11.37; 100.00	31.01894; 56.05057; 71.05024; 88.07679	40.05; 57.16; 98.42; 100.00	42.03492; 55.01894; 56.05057	100.00; 13.26; 13.77
497	121.06589	122.0731649	C8H10O	CC1=CC=C(C=C1)OC	91.05532; 121.06589	2.88; 100.00	65.03967; 91.05532; 93.03459; 105.03459; 121.06589	16.69; 30.54; 19.72; 35.22; 100.00	49.00837; 51.02402; 55.01894; 65.03967; 67.05532; 91.05532; 105.03459	28.46; 22.24; 19.63; 29.80; 14.38; 100.00; 67.98
498	183.17544	184.1827154	C12H24O	CCC(C)(C)C1CCC(CC1)OC	181.15979; 183.17544	11.91; 100.00	181.15979; 183.17544	22.86; 100.00	55.01894; 71.08662; 83.08662; 95.05024; 97.06589; 123.11792; 127.14922; 137.13357; 151.11284; 151.14922; 153.16487; 167.14414; 181.15979; 183.17544	10.36; 5.94; 9.44; 14.01; 9.87; 6.66; 10.31; 7.10; 6.32; 24.94; 21.49; 27.19; 13.35; 100.00
499	183.08154	184.088815	C13H12O	CC1=CC(=CC=C1)OC2=CC=CC=C2	141.03459; 183.08154	0.41; 100.00	117.03459; 183.08154	11.54; 100.00	65.00329; 91.01894; 93.03459; 107.05024; 117.03459; 131.05024	21.83; 28.07; 86.01; 100.00; 76.32; 38.31
500	328.09547	329.1027486	C19H14F3NO	CN1C=C(C(=O)C(=C1)C2=CC(=CC=C2)C(F)(F)F)C3=CC=CC=C3	278.07982; 328.09547	0.03; 100.00	302.07982; 328.09547	0.26; 100.00	208.07679; 302.07982; 326.07982; 328.09547	25.60; 17.44; 18.73; 100.00
501	164.05778	165.0650599	C6H7N5O	CN1C(=O)C2=C(N=CN2)N=C1N	133.01558; 164.05778	18.44; 100.00	41.01452; 65.01452; 66.00977; 67.03017; 80.02542; 93.00944; 107.03632; 108.02034; 133.01558; 137.04688; 164.05778	15.09; 15.77; 14.29; 20.36; 33.17; 51.63; 42.54; 100.00; 15.72; 18.94; 49.73	65.01452; 66.00977	8.01; 100.00
502	141.07097	142.0782503	C11H10	CC1=CC=CC2=CC=CC=C12	77.03967; 141.07097	0.22; 100.00	115.05532; 141.07097	2.25; 100.00	115.05532; 141.07097	20.67; 100.00
503	215.08662	216.0939004	C17H12	CC1=C2C=CC3=CC=CC4=C3C2=C(C=C1)C=C4	189.07097; 215.08662	0.02; 100.00	189.07097; 215.08662	0.30; 100.00	165.07097; 215.08662	12.18; 100.00
504	225.11323	226.1205091	C12H18O4	CC(CCOC(=O)C(=C)C)OC(=O)C(=C)C	69.03459; 85.02950; 157.08702; 225.11323	57.86; 100.00; 76.94; 46.75	41.03967; 85.02950; 87.04515; 127.07645; 135.04515; 139.07645; 157.08702	5.14; 100.00; 9.21; 5.83; 7.13; 9.11; 5.36	41.03967; 85.02950	16.89; 100.00
505	273.20713	274.2144094	C15H30O4	CCCCCCCCCCCC(=O)OCC(CO)O	43.01894; 59.01385; 73.02950; 181.15979; 199.17035; 273.20713	21.71; 46.37; 39.50; 100.00; 21.38; 91.36	43.01894; 45.03459; 55.01894; 57.03459; 59.01385; 73.02950; 181.15979; 199.17035; 273.20713	25.35; 9.46; 15.74; 24.08; 38.22; 100.00; 45.82; 44.89; 11.08	41.00329; 44.99820; 59.01385; 61.02950; 71.01385; 73.02950; 75.04515; 99.04515; 101.06080; 103.07645; 113.06080; 115.07645; 117.09210; 123.11792; 125.13357; 127.07645; 127.14922; 129.09210; 131.10775; 141.09210; 143.10775; 145.12340; 155.10775; 157.12340; 169.12340; 181.15979; 183.17544; 197.15470; 199.17035	9.54; 28.04; 63.12; 20.01; 36.92; 11.26; 9.51; 16.99; 24.79; 10.96; 28.71; 14.66; 17.20; 11.39; 11.85; 34.86; 31.98; 25.62; 11.24; 50.62; 45.20; 21.35; 25.88; 33.33; 11.54; 30.26; 11.31; 19.74; 100.00
506	184.07679	185.084064	C12H11NO	C1=CC=C2C(=C1)C=CC=C2CC(=O)N	141.07097; 184.07679	60.90; 100.00	41.99854; 141.07097	100.00; 70.29	41.99854; 141.07097	100.00; 32.68
507	185.0608	186.0680796	C12H10O2	C1=CC=C2C(=C1)C=CC=C2CC(=O)O	141.07097; 185.06080	89.06; 100.00	141.07097; 185.06080	100.00; 6.43	115.05532; 141.07097; 167.05024	20.03; 100.00; 12.94
508	143.05024	144.0575149	C10H8O	C1=CC=C2C(=C1)C=CC=C2O	115.05532; 143.05024	0.19; 100.00	115.05532; 143.05024	4.80; 100.00	41.00329; 65.00329; 115.05532; 143.05024	24.23; 26.55; 100.00; 41.01
509	142.06622	143.0734993	C10H9N	C1=CC=C2C(=C1)C=CC=C2N	115.05532; 142.06622	0.16; 100.00	115.05532; 142.06622	4.27; 100.00	64.01927; 77.03967; 115.05532; 140.05057; 142.06622	61.12; 32.21; 36.29; 56.92; 100.00
510	143.14414	144.1514153	C9H20O	CCCCCCCCCO	113.13357; 143.14414	3.10; 100.00	111.11792; 113.13357; 143.14414	19.89; 13.59; 100.00	41.03967; 43.01894; 43.05532; 53.03967; 55.01894; 55.05532; 57.03459; 57.07097; 67.05532; 69.07097; 71.08662; 85.10227; 97.10227; 113.13357; 125.13357; 143.14414	7.48; 100.00; 7.27; 14.57; 19.10; 7.74; 37.84; 21.89; 27.88; 6.79; 36.12; 6.39; 6.32; 6.39; 14.75; 23.63
511	269.28499	270.2922658	C18H38O	CCCCCCCCCCCCCCCCCCO	267.26934; 269.28499	8.51; 100.00	267.26934; 269.28499	9.38; 100.00	41.03967; 43.01894; 55.01894; 57.03459; 57.07097; 59.05024; 67.05532; 71.08662; 99.11792; 125.13357; 127.11284; 127.14922; 139.14922; 141.12849; 167.18052; 169.19617; 181.19617; 195.21182; 197.19109; 197.22747; 209.22747; 211.20674; 211.24312; 213.22239; 225.22239; 237.25877; 239.23804; 239.27442; 251.27442; 267.26934; 269.28499	7.32; 35.64; 12.49; 15.54; 10.11; 6.43; 7.86; 15.48; 5.89; 7.45; 5.86; 20.44; 7.74; 7.82; 8.94; 6.56; 7.58; 12.72; 7.34; 6.34; 9.60; 9.86; 7.93; 5.79; 7.67; 10.03; 7.72; 7.87; 18.54; 7.10; 100.00
512	251.27443	252.2817011	C18H36	CCCCCCCCCCCCCCCCC=C	249.25877; 251.27442	2.05; 100.00	249.25877; 251.27442	4.56; 100.00	65.03967; 67.05532; 71.08662; 121.10227; 123.11792; 125.13357; 127.14922; 137.13357; 141.16487; 151.14922; 155.18052; 165.16487; 167.18052; 169.19617; 179.18052; 183.21182; 193.19617; 197.22747; 207.21182; 209.22747; 221.22747; 249.25877; 251.27442	8.34; 8.85; 14.26; 9.67; 18.63; 11.77; 35.18; 19.87; 9.84; 18.18; 8.63; 28.01; 7.83; 15.59; 22.59; 7.97; 22.51; 16.36; 17.99; 13.79; 16.85; 17.73; 100.00
513	128.14447	129.1517496	C8H19N	CCCCCCCCN	126.12882; 128.14447	2.65; 100.00	126.12882; 128.14447	32.63; 100.00	42.03492; 53.03967; 55.05532; 56.05057; 57.07097; 58.06622; 67.05532; 70.06622; 71.08662; 72.08187; 126.12882; 128.14447	100.00; 6.25; 7.54; 10.23; 10.46; 9.14; 7.03; 12.37; 11.33; 5.84; 5.88; 24.72
514	211.0565	212.0637786	C8H17ClO2S	CCCCCCCCS(=O)(=O)Cl	111.11792; 211.05650	0.31; 100.00	209.04085; 211.05650	2.34; 100.00	34.96940; 64.97027; 76.97027; 98.93130; 100.94695; 102.96260; 112.94695; 116.97825; 119.01722; 138.96260; 140.97825; 145.00955; 152.97825; 154.99390; 159.02520; 166.99390; 169.00955; 195.02520; 211.05650	6.78; 5.38; 4.60; 100.00; 5.75; 16.44; 8.66; 2.86; 5.16; 12.85; 7.52; 3.05; 8.13; 3.40; 3.62; 6.95; 5.37; 2.84; 8.50
515	145.10565	146.1129218	C8H18S	CCCCCCCCS	111.11792; 145.10565	14.72; 100.00	143.09000; 145.10565	37.40; 100.00	32.98044; 58.99609; 70.99609; 73.01174; 75.02739; 87.02739; 145.10565	100.00; 87.10; 8.32; 52.95; 28.55; 8.27; 32.49
516	129.12849	130.1357652	C8H18O	CCCCCCCCO	111.11792; 129.12849	3.53; 100.00	99.11792; 111.11792; 127.11284; 129.12849	13.69; 25.35; 32.71; 100.00	41.03967; 43.01894; 53.03967; 55.01894; 55.05532; 57.03459; 57.07097; 59.05024; 67.05532; 71.08662; 97.10227; 129.12849	11.17; 100.00; 12.32; 14.27; 12.08; 31.23; 16.67; 6.49; 12.29; 14.61; 6.18; 11.87
517	127.11284	128.1201151	C8H16O	CCCCCC(C=C)O	99.08154; 127.11284	36.52; 100.00	41.00329; 55.01894; 57.03459; 79.05532; 81.07097; 97.06589; 99.08154; 109.10227; 127.11284	9.96; 32.54; 17.78; 14.96; 35.47; 80.77; 100.00; 11.73; 87.10	39.02402; 41.03967; 51.02402; 53.03967; 55.01894; 57.03459; 57.07097; 59.05024; 65.03967; 67.05532; 69.03459; 71.05024; 71.08662; 83.05024; 97.06589; 99.08154; 125.09719	41.19; 13.57; 56.15; 28.74; 38.18; 100.00; 14.45; 19.67; 31.81; 39.33; 18.71; 29.32; 18.39; 15.65; 15.23; 31.29; 14.81
518	125.09719	126.1044651	C8H14O	CCCCCC(=O)C=C	97.06589; 125.09719	16.30; 100.00	41.00329; 55.01894; 67.01894; 69.03459; 79.05532; 81.07097; 95.05024; 97.06589; 99.08154; 125.09719	45.38; 31.83; 28.79; 17.96; 28.22; 29.02; 46.09; 92.83; 65.19; 100.00	41.00329; 43.01894; 49.00837; 51.02402; 53.00329; 53.03967; 55.01894; 63.02402; 65.03967; 67.01894; 69.03459	71.27; 37.28; 26.11; 51.66; 34.88; 31.59; 32.99; 17.42; 43.49; 33.49; 100.00
519	111.11792	112.1252005	C8H16	CCCCCCC=C	109.10227; 111.11792	1.11; 100.00	109.10227; 111.11792	35.50; 100.00	39.02402; 51.02402; 53.03967; 55.05532; 57.07097; 65.03967; 67.05532; 109.10227; 111.11792	27.85; 19.98; 100.00; 22.37; 31.37; 21.01; 27.04; 19.69; 28.83
520	196.17069	197.1779644	C12H23NO	CCCCCCCCN1CCCC1=O	84.04549; 196.17069	4.21; 100.00	67.01894; 82.02984; 84.04549; 97.10227; 99.11792; 126.12882; 128.14447; 196.17069	4.20; 4.77; 4.80; 8.02; 5.83; 4.63; 3.38; 100.00	41.00329; 42.03492; 43.05532; 52.01927; 53.03967; 56.05057; 57.07097; 65.03967; 66.03492; 67.01894; 67.05532; 68.05057; 71.08662; 80.01419; 82.02984; 84.04549; 92.05057; 98.06114; 108.04549; 110.06114; 112.07679; 122.09752; 124.07679; 126.09244; 126.12882; 128.14447; 138.09244; 196.17069	29.34; 38.84; 21.04; 15.72; 24.00; 16.41; 34.38; 16.88; 100.00; 22.97; 35.59; 28.19; 38.84; 22.70; 49.13; 68.70; 38.36; 30.07; 16.71; 43.19; 36.53; 18.04; 19.03; 22.88; 39.55; 54.88; 16.13; 17.18
521	125.09719	126.1044651	C8H14O	CCCCCC(C#C)O	99.08154; 125.09719	11.18; 100.00	65.03967; 69.03459; 77.03967; 79.05532; 81.07097; 83.05024; 91.05532; 95.05024; 97.06589; 99.08154; 107.08662; 109.06589; 123.08154; 125.09719	14.42; 7.03; 12.73; 10.90; 27.31; 8.03; 9.25; 22.71; 22.70; 57.00; 23.73; 16.94; 7.12; 100.00	41.00329; 43.01894; 43.05532; 45.03459; 49.00837; 51.02402; 53.00329; 53.03967; 55.01894; 55.05532; 57.03459; 59.05024; 63.02402; 65.03967; 67.01894; 67.05532; 69.03459; 81.03459; 97.06589; 99.08154; 107.05024; 123.08154	46.37; 22.70; 21.48; 26.63; 96.38; 82.27; 71.18; 48.29; 100.00; 23.15; 50.22; 42.08; 25.52; 77.00; 51.98; 28.05; 42.34; 19.80; 20.63; 25.54; 22.04; 26.65
522	235.17035	236.17763	C15H24O2	CCCCCCOC1=C(C(=C(C(=C1)C)O)C)C	141.12849; 235.17035	22.93; 100.00	131.05024; 133.06589; 135.08154; 141.12849; 149.06080; 151.07645; 235.17035	7.02; 45.25; 27.47; 14.27; 57.74; 14.33; 100.00	67.01894; 69.03459; 95.05024; 97.06589; 119.05024; 119.08662; 121.06589; 131.05024; 133.02950; 133.06589; 135.04515; 135.08154; 147.04515; 149.06080; 151.07645; 161.06080; 163.07645; 177.09210	10.26; 7.35; 10.05; 5.89; 9.29; 4.95; 5.10; 21.79; 19.29; 46.32; 15.11; 22.05; 16.76; 100.00; 49.64; 10.88; 12.91; 6.47
523	105.05572	106.0629942	C4H10O3	COCC(CO)O	43.01894; 57.03459; 59.01385; 87.04515; 105.05572	43.24; 57.07; 48.64; 100.00; 54.78	41.00329; 59.01385; 87.04515	8.90; 100.00; 7.72	41.00329; 59.01385	70.88; 100.00
524	227.23804	228.2453156	C15H32O	CCCCCCCCCCCCCCCO	225.22239; 227.23804	8.51; 100.00	225.22239; 227.23804	9.31; 100.00	41.03967; 43.01894; 53.03967; 55.01894; 57.03459; 57.07097; 59.05024; 67.05532; 71.08662; 99.11792; 111.11792; 113.13357; 125.13357; 127.11284; 127.14922; 129.12849; 139.14922; 141.12849; 143.14414; 153.16487; 155.14414; 155.18052; 167.18052; 169.15979; 195.21182; 197.22747; 209.22747; 227.23804	7.84; 40.55; 8.32; 15.85; 17.05; 20.06; 8.47; 18.86; 33.20; 17.82; 11.30; 9.99; 14.60; 9.63; 33.38; 7.85; 8.35; 16.36; 9.11; 9.69; 6.68; 8.27; 11.17; 13.55; 10.48; 6.60; 15.91; 100.00
525	87.08154	88.088815	C5H12O	CCCCCO	57.07097; 87.08154	9.25; 100.00	85.06589; 87.08154	100.00; 63.89	41.03967; 43.01894; 55.01894; 57.03459; 57.07097	10.13; 100.00; 8.24; 40.89; 21.22
526	69.07097	70.07825032	C5H10	CCCC=C	67.05532; 69.07097	0.94; 100.00	67.05532; 69.07097	32.19; 100.00	67.05532; 69.07097	83.32; 100.00
527	151.07645	152.0837296	C9H12O2	CC(COC1=CC=CC=C1)O	57.03459; 93.03459	64.54; 100.00	57.03459; 93.03459	39.88; 100.00	65.03967; 93.03459	3.66; 100.00
528	172.0404	173.0476785	C10H7NO2	C1=CC=C(C=C1)N2C(=O)C=CC2=O	92.05057; 172.04040	0.40; 100.00	92.05057; 144.04549; 172.04040	27.94; 37.69; 100.00	53.00329; 92.05057; 118.02984; 120.00910; 122.02475; 144.04549	43.16; 100.00; 16.80; 36.32; 41.40; 21.52
529	145.05197	146.0592462	C7H6N4	C1=CC=C(C=C1)N2C=NN=N2	93.02067; 145.05197	0.26; 100.00	117.04582; 145.05197	6.44; 100.00	67.03017; 93.02067; 117.04582; 145.05197; 0	17.57; 24.27; 100.00; 86.62; 145.0519697399
530	135.08154	136.088815	C9H12O	CCC(C1=CC=CC=C1)O	117.07097; 135.08154	25.52; 100.00	57.03459; 77.03967; 91.05532; 117.07097; 135.08154	40.00; 74.36; 44.08; 43.15; 100.00	49.00837; 55.01894; 57.03459; 63.02402; 65.03967; 77.03967; 133.06589	13.80; 6.43; 10.43; 9.71; 16.10; 100.00; 10.05
531	151.03354	152.0408194	C7H8N2S	C1=CC=C(C=C1)NC(=S)N	92.05057; 151.03354	54.27; 100.00	57.97569; 92.05057	100.00; 11.14	57.97569; 92.05057	52.11; 100.00
532	148.08802	149.0952974	C8H11N3	CN(C)N=NC1=CC=CC=C1	44.05057; 148.08802	7.57; 100.00	42.03492; 44.05057; 148.08802	63.55; 100.00; 87.56	44.05057; 77.03967; 105.04582	50.61; 100.00; 85.70
533	173.07204	174.0793129	C10H10N2O	CC1=NN(C(=O)C1)C2=CC=CC=C2	95.02509; 173.07204	0.70; 100.00	145.07712; 173.07204	8.65; 100.00	40.01927; 41.00329; 53.01452; 56.05057; 65.99854; 121.04074; 123.05639	17.01; 22.99; 11.13; 17.09; 100.00; 18.69; 32.26
534	161.07204	162.0793129	C9H10N2O	C1CN(NC1=O)C2=CC=CC=C2	41.99854; 161.07204	18.07; 100.00	41.00329; 41.99854; 55.01894; 105.04582; 107.06147; 161.07204	7.17; 62.44; 18.31; 9.37; 5.99; 100.00	40.01927; 41.99854; 77.03967; 92.05057; 105.04582	7.25; 89.67; 9.45; 100.00; 7.61
535	177.0921	178.0993797	C11H14O2	CCC(=O)OC(C)C1=CC=CC=C1	73.02950; 103.05532	100.00; 11.28	57.03459; 73.02950; 77.03967; 103.05532; 105.07097	44.49; 69.04; 100.00; 86.52; 56.52	41.00329; 43.01894; 55.01894; 71.01385; 73.02950; 77.03967	82.74; 100.00; 53.76; 31.31; 75.68; 61.32
536	133.06589	134.0731649	C9H10O	CCC(=O)C1=CC=CC=C1	77.03967; 133.06589	26.49; 100.00	77.03967; 105.03459; 133.06589	77.16; 31.04; 100.00	55.01894; 63.02402; 77.03967	8.37; 8.55; 100.00
537	231.21182	232.2191009	C17H28	CCCCCCCCCCCC1=CC=CC=C1	119.08662; 231.21182	0.57; 100.00	91.05532; 231.21182	1.91; 100.00	53.03967; 57.07097; 67.05532; 71.08662; 77.03967; 91.05532; 97.10227; 103.05532; 105.07097; 107.08662; 109.10227; 119.08662; 121.10227; 123.11792; 125.13357; 137.13357; 139.14922; 147.11792; 149.13357; 153.16487; 201.16487; 203.18052; 231.21182	7.63; 9.15; 39.12; 26.21; 89.69; 100.00; 6.46; 9.75; 7.24; 12.00; 10.67; 23.87; 9.58; 11.51; 11.87; 5.79; 9.89; 9.99; 8.51; 8.32; 8.73; 9.67; 21.11
538	161.02126	162.0285407	C5H10N2S2	C1CN(CCN1)C(=S)S	127.03354; 161.02126	2.39; 100.00	57.97569; 76.95252; 127.03354; 161.02126	11.88; 16.02; 34.12; 100.00	32.98044; 57.97569; 76.95252	8.37; 10.39; 100.00
539	129.10334	130.1106131	C6H14N2O	C1CN(CCN1)CCO	111.09277; 129.10334	19.70; 100.00	42.03492; 95.06147; 97.07712; 99.09277; 109.07712; 111.09277; 129.10334	18.47; 26.95; 20.27; 8.00; 40.94; 100.00; 60.72	40.01927; 42.03492; 57.04582; 58.02984; 60.04549; 70.06622; 83.06147; 85.07712	39.17; 100.00; 6.54; 7.43; 6.79; 6.67; 33.65; 6.68
540	191.15537	192.1626486	C12H20N2	C1CCC(CC1)(C#N)N2CCCCC2	84.08187; 191.15537	2.06; 100.00	106.06622; 191.15537	4.63; 100.00	52.01927; 64.01927; 66.03492; 77.03967; 79.05532; 81.07097; 82.06622; 84.08187; 91.05532; 106.06622; 108.08187; 119.06147; 121.07712; 135.09277; 158.09752; 160.11317; 163.12407; 172.11317; 189.13972	38.59; 17.26; 21.54; 21.54; 14.55; 17.70; 30.85; 59.85; 43.12; 61.46; 44.00; 22.61; 26.58; 13.00; 32.72; 27.27; 23.74; 11.83; 100.00
541	59.05024	60.05751487	C3H8O	CCCO	57.03459; 59.05024	8.85; 100.00	57.03459; 59.05024	51.33; 100.00	41.03967; 59.05024	67.13; 100.00
542	117.0921	118.0993797	C6H14O2	CCCOCC(C)O	59.05024; 117.09210	98.69; 100.00	57.03459; 59.05024; 117.09210	100.00; 94.59; 14.46	43.01894; 45.03459; 55.01894; 57.03459	100.00; 16.75; 27.93; 51.29
543	131.10775	132.1150297	C7H16O2	CC(COC(C)(C)C)O	73.06589; 131.10775	32.94; 100.00	43.01894; 57.03459; 111.08154; 113.09719; 131.10775	49.42; 100.00; 28.07; 91.66; 36.14	43.01894; 45.03459; 55.01894; 57.03459; 57.07097; 73.06589	100.00; 16.07; 19.75; 69.30; 27.79; 24.39
544	213.22239	214.2296656	C14H30O	CCCCCCCCCCCCCCO	211.20674; 213.22239	8.50; 100.00	211.20674; 213.22239	9.28; 100.00	41.03967; 43.01894; 53.03967; 55.01894; 57.03459; 57.07097; 59.05024; 67.05532; 71.08662; 85.10227; 97.10227; 99.11792; 111.11792; 113.13357; 125.13357; 127.11284; 127.14922; 129.12849; 139.14922; 141.12849; 153.16487; 155.18052; 169.15979; 181.19617; 195.21182; 213.22239	7.82; 42.26; 11.70; 17.46; 17.85; 24.76; 9.40; 21.02; 34.65; 11.69; 8.39; 16.90; 12.19; 13.72; 13.81; 12.18; 26.53; 8.30; 9.97; 17.05; 8.49; 8.30; 8.04; 10.43; 14.03; 100.00
545	195.21182	196.2191009	C14H28	CCCCCCCCCCCCC=C	193.19617; 195.21182	2.04; 100.00	193.19617; 195.21182	4.54; 100.00	51.02402; 53.03967; 57.07097; 65.03967; 67.05532; 71.08662; 95.08662; 99.11792; 109.10227; 113.13357; 123.11792; 125.13357; 127.14922; 137.13357; 141.16487; 151.14922; 153.16487; 165.16487; 195.21182	12.90; 16.57; 26.09; 28.13; 30.56; 49.11; 19.75; 13.57; 23.22; 26.09; 47.92; 18.96; 18.05; 28.94; 25.78; 19.19; 14.71; 17.98; 100.00
546	107.01722	108.0245007	C3H8O2S	C(C(CS)O)O	32.98044; 89.00666; 107.01722	15.56; 35.30; 100.00	32.98044; 59.01385	100.00; 2.94	32.98044; 41.00329; 74.99101	100.00; 17.57; 19.54
547	199.20674	200.2140155	C13H28O	CCCCCCCCCCCCCO	197.19109; 199.20674	8.49; 100.00	197.19109; 199.20674	9.22; 100.00	43.01894; 53.03967; 55.01894; 57.03459; 57.07097; 67.05532; 71.08662; 85.10227; 97.10227; 99.11792; 111.11792; 113.09719; 113.13357; 125.13357; 127.11284; 127.14922; 129.12849; 139.14922; 141.12849; 143.14414; 167.18052; 181.19617; 199.20674	53.68; 18.50; 26.38; 28.85; 32.43; 33.60; 60.19; 12.45; 15.89; 27.04; 15.16; 10.75; 14.00; 27.80; 18.06; 29.20; 9.85; 11.57; 20.60; 12.24; 11.25; 11.92; 100.00
548	181.19617	182.2034508	C13H26	CCCCCCCCCCCC=C	179.18052; 181.19617	2.05; 100.00	179.18052; 181.19617	4.56; 100.00	51.02402; 53.03967; 57.07097; 65.03967; 67.05532; 71.08662; 95.08662; 99.11792; 109.10227; 113.13357; 123.11792; 125.13357; 127.14922; 137.13357; 139.14922; 151.14922; 181.19617	19.36; 35.52; 31.40; 35.35; 38.35; 59.54; 36.06; 23.05; 30.96; 18.68; 58.89; 24.28; 35.46; 26.08; 31.55; 19.01; 100.00
549	171.17544	172.1827154	C11H24O	CCCCCCCCCCCO	169.15979; 171.17544	8.49; 100.00	169.15979; 171.17544	9.17; 100.00	41.03967; 43.01894; 53.03967; 55.01894; 55.05532; 57.03459; 57.07097; 59.05024; 67.05532; 71.08662; 85.10227; 97.10227; 99.11792; 111.11792; 113.09719; 113.13357; 125.13357; 127.11284; 139.14922; 171.17544	11.64; 100.00; 27.12; 34.44; 17.32; 45.39; 47.81; 12.71; 47.77; 66.03; 11.32; 21.39; 22.07; 19.70; 15.70; 18.72; 14.45; 11.85; 11.94; 80.50
550	213.07685	214.0841235	C10H14O5	CC(=C)C(=O)OCCOC(=O)CC(=O)C	43.01894; 59.01385; 85.02950; 101.02442; 129.05572	31.81; 24.24; 100.00; 41.48; 21.54	43.01894; 57.03459; 59.01385; 83.01385; 85.02950; 101.02442	78.32; 31.25; 31.33; 68.58; 83.62; 100.00	41.03967; 43.01894; 57.03459; 65.00329; 67.01894; 71.01385; 85.02950; 101.02442	31.82; 58.38; 67.21; 16.87; 15.81; 18.64; 100.00; 30.03
551	150.09244	151.099714	C9H13NO	CN(C)CC1=CC=CC=C1O	105.03459; 150.09244	16.34; 100.00	105.03459; 107.05024	18.84; 100.00	28.01927; 42.03492; 44.05057; 93.03459; 107.05024	26.12; 21.52; 100.00; 48.12; 29.36
552	163.11284	164.1201151	C11H16O	CCCC(C)C1=CC=CC=C1O	161.09719; 163.11284	1.06; 100.00	93.03459; 133.06589; 163.11284	9.00; 5.60; 100.00	41.00329; 51.02402; 63.02402; 65.03967; 67.05532; 77.03967; 89.03967; 93.03459; 103.05532; 105.07097; 107.05024; 117.03459; 119.05024; 121.06589; 121.10227; 161.09719	13.16; 7.49; 14.99; 15.25; 8.92; 12.04; 4.95; 100.00; 10.86; 11.82; 7.18; 13.84; 26.28; 6.33; 5.40; 31.88
553	237.10517	238.1124429	C14H19ClO	CC(C)(C)C1(CO1)CCC2=CC=C(C=C2)Cl	207.09460; 237.10517	18.11; 100.00	34.96940; 139.03200; 205.07895; 207.09460; 237.10517	21.95; 17.58; 49.02; 100.00; 47.47	34.96940; 41.00329; 111.00070; 125.01635; 135.00070; 193.07895; 205.07895	100.00; 45.33; 31.84; 12.98; 10.58; 11.32; 7.19
554	266.9388	267.946077	C9H7Cl3O3	CC(C(=O)O)OC1=CC(=C(C=C1Cl)Cl)Cl	194.91767; 222.94897	100.00; 5.03	34.96940; 194.91767	1.77; 100.00	166.92276; 194.91767	5.18; 100.00
555	322.14487	323.1521435	C20H21NO3	CC(C)C1=C(C(=CC=C1)C(C)C)N2C(=O)C3=C(C2=O)C=C(C=C3)O	320.12922; 322.14487	3.16; 100.00	292.13430; 294.14995; 320.12922; 322.14487	8.46; 23.31; 17.07; 100.00	41.99854; 93.03459; 95.05024; 119.01385; 121.02950; 123.04515; 162.01967; 174.12882; 176.03532; 186.09244; 198.09244; 200.10809; 202.12374; 262.05097; 264.06662; 278.08227; 278.11865; 280.13430; 290.08227; 292.13430; 294.14995; 304.09792; 306.11357	60.76; 86.19; 15.58; 14.79; 49.83; 27.12; 42.01; 80.86; 22.82; 20.75; 19.21; 74.27; 25.24; 60.57; 60.03; 19.42; 100.00; 14.86; 29.75; 45.01; 17.55; 15.28; 39.31
556	104.0717	105.0789786	C4H11NO2	C(COCCO)N	58.02984; 60.04549; 61.02950; 104.07170	99.16; 100.00; 64.52; 51.92	43.01894; 58.02984; 60.04549; 104.07170	24.36; 100.00; 86.96; 15.45	43.01894; 58.02984; 59.01385	100.00; 68.04; 97.48
557	161.11832	162.1255944	C8H18O3	CCCCOCCOCCO	43.01894; 59.01385; 61.02950; 73.06589; 103.04007; 105.05572	31.63; 67.73; 81.87; 100.00; 42.96; 16.75	43.01894; 59.01385; 61.02950; 73.06589	10.54; 100.00; 53.97; 16.54	59.01385; 61.02950	100.00; 36.16
558	203.12888	204.1361591	C10H20O4	CCCCOCCOCCOC(=O)C	43.01894; 59.01385; 61.02950; 73.06589; 103.04007	63.07; 100.00; 24.42; 15.08; 37.39	41.00329; 43.01894; 59.01385; 61.02950; 85.02950; 103.04007; 117.09210; 203.12888	7.80; 12.94; 100.00; 25.78; 7.41; 15.47; 6.94; 8.99	43.01894; 59.01385; 61.02950; 85.02950	24.94; 100.00; 15.02; 17.84
559	202.09072	203.098	C9H17NO2S	CCCCOCCOCCSC#N	43.01894; 57.97569; 59.01385; 61.02950; 73.06589; 74.99101; 83.99134; 102.00191; 117.09210; 202.09072	24.24; 38.60; 54.09; 14.73; 30.16; 26.17; 29.49; 42.82; 48.04; 100.00	43.01894; 57.97569; 59.01385; 61.02950; 74.99101; 102.00191; 117.09210; 119.01722; 202.09072	7.19; 100.00; 13.95; 22.92; 46.95; 20.82; 6.71; 5.94; 9.28	43.01894; 57.97569; 59.01385; 61.02950; 71.99134; 74.99101	17.75; 100.00; 49.76; 27.61; 12.76; 45.78
560	170.10089	171.1081707	C9H17NS	CCC(C)C1N=C(C(S1)C)C	136.11317; 170.10089	2.32; 100.00	32.98044; 40.01927; 58.99609; 68.05057; 100.02264; 102.03829; 170.10089	36.46; 15.62; 76.21; 15.35; 44.46; 40.71; 100.00	32.98044; 40.01927; 56.98044; 57.07097; 58.99609; 61.01174; 100.02264; 102.03829; 112.02264; 114.03829; 142.06959; 154.06959; 170.10089	31.92; 13.61; 28.44; 16.74; 100.00; 10.55; 20.81; 13.48; 41.21; 9.08; 9.74; 19.59; 23.20
561	133.08702	134.0942943	C6H14O3	CCOCCOCCO	45.03459; 59.01385; 61.02950; 87.04515	30.53; 100.00; 71.66; 23.02	45.03459; 59.01385; 61.02950	33.90; 100.00; 36.60	43.01894; 59.01385	65.05; 100.00
562	175.09758	176.104859	C8H16O4	CCOCCOCCOC(=O)C	43.01894; 59.01385; 61.02950; 71.05024; 87.04515	64.69; 93.86; 22.52; 100.00; 36.26	43.01894; 45.03459; 59.01385	18.54; 8.47; 100.00	41.00329; 43.01894; 59.01385; 61.02950	14.89; 36.22; 100.00; 13.48
563	187.09758	188.104859	C9H16O4	CCOCCOCCOC(=O)C=C	43.01894; 59.01385; 61.02950; 68.99820; 71.01385; 87.04515; 89.06080; 115.07645	100.00; 56.21; 58.08; 45.63; 64.66; 33.08; 23.20; 27.57	41.00329; 43.01894; 45.03459; 59.01385; 61.02950; 68.99820; 71.01385; 87.04515; 115.04007; 133.08702	13.47; 93.62; 27.22; 19.16; 49.26; 21.44; 100.00; 15.97; 7.59; 8.42	43.01894; 44.99820; 55.01894; 59.01385; 61.02950; 68.99820; 71.01385; 87.04515	20.70; 7.19; 11.49; 16.67; 15.14; 7.37; 100.00; 7.11
564	173.1547	174.1619799	C10H22O2	CCCCC(CC)COCCO	59.01385; 61.02950; 111.11792; 129.12849; 173.15470	60.96; 44.13; 33.16; 100.00; 74.60	59.01385; 61.02950	100.00; 39.17	41.00329; 43.01894; 59.01385; 99.08154; 101.09719; 129.12849	51.37; 67.06; 100.00; 16.00; 26.29; 8.10
565	446.22379	447.2310626	C30H29N3O	CC(C)(C1=CC=CC=C1)C2=CC(=C(C(=C2)N3N=C4C=CC=CC4=N3)O)C(C)(C)C5=CC=CC=C5	418.22887; 446.22379	2.61; 100.00	312.11424; 328.14554; 416.21322; 418.22887; 446.22379	28.56; 64.98; 10.68; 10.13; 100.00	77.03967; 117.07097; 118.04107; 142.04107; 298.13497; 328.14554; 338.16627; 340.18192; 400.18192; 402.19757; 416.21322; 418.22887; 430.19249; 446.22379	43.93; 8.24; 11.52; 84.26; 23.41; 15.48; 19.21; 24.15; 27.74; 100.00; 31.06; 16.85; 8.33; 47.43
566	224.08294	225.090212	C13H11N3O	CC1=CC(=C(C=C1)O)N2N=C3C=CC=CC3=N2	118.04107; 224.08294	90.62; 100.00	118.04107; 224.08294	52.51; 100.00	92.05057; 118.04107; 142.04107; 194.07237; 224.08294	100.00; 13.96; 20.27; 9.01; 50.50
567	350.22379	351.2310626	C22H29N3O	CCC(C)(C)C1=CC(=C(C(=C1)N2N=C3C=CC=CC3=N2)O)C(C)(C)CC	118.04107; 350.22379	67.96; 100.00	318.19757; 322.22887	9.66; 10.21	41.00329; 92.05057; 97.10227; 105.04582; 107.06147; 118.04107; 142.04107; 189.10334; 191.11899; 210.10367; 224.11932; 226.12374; 238.13497; 240.13939; 242.15504; 244.17069; 255.15029; 257.16594; 264.11424; 270.16119; 272.17684; 292.18192; 306.19757; 317.16594; 318.19757; 320.21322; 322.22887; 333.19724; 334.19249; 348.20814; 350.22379; 0.0030743)	36.05; 25.35; 17.43; 28.93; 19.21; 70.54; 100.00; 25.37; 25.60; 18.91; 29.29; 37.20; 33.17; 31.73; 25.24; 21.88; 19.75; 15.87; 20.54; 23.70; 26.04; 21.56; 21.47; 22.01; 60.86; 19.53; 30.65; 37.35; 33.61; 26.84; 60.05;
568	211.17035	212.17763	C13H24O2	CCC(C)(C)C1CCCCC1OC(=O)C	59.01385; 211.17035	27.70; 100.00	41.00329; 59.01385; 169.15979; 211.17035	16.26; 100.00; 52.53; 30.39	41.00329; 59.01385	65.47; 100.00
569	147.10267	148.1099444	C7H16O3	CCCOCCOCCO	43.01894; 59.01385; 59.05024; 61.02950; 103.07645	47.19; 88.41; 100.00; 50.78; 67.94	57.03459; 59.01385; 59.05024; 61.02950	47.46; 94.01; 100.00; 51.98	41.00329; 59.01385; 61.02950	34.65; 100.00; 42.45
570	122.06114	123.0684139	C7H9NO	C1=CC=NC(=C1)CCO	92.05057; 122.06114	100.00; 46.79	92.05057; 104.05057	100.00; 63.41	40.01927; 41.00329; 49.00837; 64.01927; 66.03492; 78.03492; 92.05057; 104.05057	12.93; 10.90; 11.39; 56.96; 33.87; 43.73; 100.00; 30.58
572	196.11317	197.1204495	C14H15N	C1=CC=C(C=C1)CCCC2=CC=CC=N2	92.05057; 196.11317	1.16; 100.00	91.05532; 92.05057; 196.11317	6.28; 8.78; 100.00	64.01927; 66.03492; 77.03967; 78.03492; 91.05532; 92.05057; 101.03967; 102.03492; 115.05532; 116.05057; 144.08187; 154.06622; 179.08662	21.08; 21.68; 15.48; 38.10; 72.95; 100.00; 6.84; 11.83; 50.68; 7.94; 14.44; 11.26; 35.94
573	319.02166	320.0289346	C14H12N2O3S2	CC1=C(C2=C(C=C1)N=C(S2)C3=CC=C(C=C3)N)S(=O)(=O)O	80.96519; 319.02166	1.58; 100.00	265.99511; 319.02166	5.73; 100.00	80.96519; 104.05057; 117.04582; 184.00739; 239.06484; 319.02166	94.14; 25.66; 35.64; 18.07; 34.76; 100.00
574	203.14414	204.1514153	C14H20O	CC(CC1=CC=C(C=C1)C(C)(C)C)C=O	147.11792; 203.14414	5.46; 100.00	55.01894; 147.11792; 175.14922; 203.14414	34.04; 100.00; 42.88; 39.65	53.00329; 55.01894; 91.05532; 117.07097; 131.08662; 133.10227; 147.11792; 201.12849	11.82; 34.64; 24.16; 17.46; 53.96; 7.27; 100.00; 7.24
575	349.32244	350.329714	C22H42N2O	CCCCCCCCC=CCCCCCCCC1=NCCN1CCO	305.29622; 349.32244	22.14; 100.00	67.03017; 69.04582; 83.06147; 95.06147; 235.24312; 237.25877; 288.26967; 290.28532; 303.28057; 305.29622; 319.31187; 331.31187; 349.32244	8.50; 3.06; 4.70; 3.96; 15.63; 16.41; 4.30; 2.59; 3.13; 35.41; 7.21; 4.12; 100.00	40.01927; 42.03492; 43.01894; 45.03459; 56.01419; 56.05057; 58.02984; 60.04549; 67.03017; 69.04582; 70.02984; 81.04582; 83.02509; 83.06147; 95.06147; 97.07712; 109.07712; 113.07204; 127.08769; 235.24312; 260.23837; 262.25402; 264.26967; 276.26967; 303.28057; 305.29622; 306.28024; 319.27549; 321.29114; 323.30679; 349.32244	13.79; 38.45; 100.00; 10.64; 15.60; 9.23; 27.76; 9.27; 60.80; 69.54; 12.30; 56.69; 18.04; 79.76; 55.39; 20.75; 22.62; 9.46; 11.14; 9.71; 9.75; 22.04; 25.92; 11.07; 13.12; 15.95; 9.34; 9.09; 14.58; 11.37; 14.34
576	178.05097	179.0582431	C9H9NO3	CC(=O)OC1=CC=CC=C1C(=O)N	136.04040; 178.05097	64.03; 100.00	41.99854; 93.03459; 135.04515; 136.04040	50.86; 100.00; 14.69; 52.51	41.00329; 41.99854; 59.01385; 93.03459	6.00; 100.00; 14.32; 31.01
577	149.09719	150.1044651	C10H14O	CCC(C)C1=CC=CC=C1O	131.08662; 149.09719	0.98; 100.00	131.08662; 149.09719	5.47; 100.00	41.00329; 49.00837; 51.02402; 63.02402; 65.03967; 67.05532; 77.03967; 89.03967; 91.05532; 93.03459; 93.07097; 103.05532; 105.07097; 107.05024; 117.03459; 119.05024; 121.06589	12.83; 12.02; 9.92; 12.18; 26.41; 6.31; 19.70; 13.63; 23.65; 100.00; 7.39; 11.24; 6.51; 6.77; 16.80; 33.57; 11.64
578	194.00143	195.0087061	C9H6ClNO2	C1=CC=C2C(=C1)C(=O)N(C2=O)CCl	166.00652; 194.00143	0.36; 100.00	166.00652; 194.00143	12.66; 100.00	34.96940; 77.03967; 105.03459; 166.00652	42.04; 100.00; 21.32; 6.53
579	184.1343	185.1415788	C10H19NO2	CCN(CC)CCOC(=O)C(=C)C	85.02950; 116.10809; 184.13430	100.00; 28.59; 67.07	41.03967; 85.02950; 87.04515; 94.06622; 96.08187; 98.09752	9.50; 100.00; 14.01; 9.47; 81.48; 58.06	41.03967; 43.01894; 58.06622; 68.05057; 70.06622; 72.08187; 82.06622; 85.02950; 88.07679; 96.08187; 98.09752	100.00; 27.00; 30.06; 43.91; 25.71; 42.31; 16.48; 76.75; 24.79; 16.82; 46.85
580	116.10809	117.1153641	C6H15NO	CC(C)(CO)N(C)C	86.09752; 116.10809	8.76; 100.00	84.08187; 116.10809	24.31; 100.00	68.05057; 70.06622; 84.08187; 86.09752; 116.10809	38.87; 19.44; 100.00; 14.07; 16.53
581	142.08735	143.0946287	C7H13NO2	CN(C)CCOC(=O)C=C	71.01385; 88.07679	100.00; 69.03	68.99820; 71.01385	9.06; 100.00	44.99820; 71.01385	8.87; 100.00
582	156.103	157.1102787	C8H15NO2	CC(=C)C(=O)OCCN(C)C	85.02950; 88.07679	100.00; 18.86	70.06622; 85.02950; 87.04515	15.99; 100.00; 11.14	41.03967; 54.03492; 70.06622; 85.02950	100.00; 19.48; 15.30; 54.08
583	229.2173	230.2245802	C14H30O2	CCCCCCCCCCCCOCCO	59.01385; 61.02950; 229.21730	100.00; 74.82; 97.66	59.01385; 61.02950; 185.19109; 229.21730	98.36; 83.61; 16.56; 100.00	41.00329; 43.01894; 59.01385; 61.02950; 127.14922; 155.18052; 167.18052; 183.17544; 185.19109; 229.21730	35.32; 22.15; 100.00; 18.78; 3.41; 3.17; 3.64; 2.95; 4.66; 2.99
584	173.10842	174.1156985	C11H14N2	CCN(CC#N)C1=CC=CC(=C1)C	145.07712; 173.10842	42.79; 100.00	40.01927; 118.06622; 130.06622; 132.08187; 145.07712; 155.06147; 173.10842	97.72; 26.47; 56.94; 37.49; 94.43; 41.17; 100.00	64.01927; 91.05532; 103.03017; 106.06622; 118.06622; 129.04582; 130.06622; 143.06147; 145.07712; 154.06622; 155.06147	9.42; 92.24; 11.94; 11.00; 100.00; 46.42; 59.81; 18.69; 31.68; 10.00; 16.28
585	88.07679	89.08406397	C4H11NO	CCNCCO	44.05057; 88.07679	12.64; 100.00	42.03492; 70.06622; 84.04549; 86.06114; 88.07679	56.52; 32.26; 18.37; 41.92; 100.00	42.03492; 44.05057	100.00; 20.44
586	119.07137	120.0786442	C5H12O3	CC(CO)(CO)CO	69.03459; 87.04515; 89.06080; 119.07137	33.09; 35.32; 43.67; 100.00	57.03459; 59.05024; 71.05024; 87.04515; 89.06080; 119.07137	57.31; 61.46; 100.00; 76.78; 79.95; 97.23	55.01894; 57.03459; 59.05024	38.10; 51.61; 100.00
587	199.01675	200.0240218	C9H9ClO3	CC(C(=O)O)OC1=CC(=CC=C1)Cl	126.99562; 199.01675	100.00; 87.47	34.96940; 126.99562	27.67; 100.00	34.96940; 65.00329; 126.99562	34.18; 19.96; 100.00
588	283.0039	284.0111765	C11H12N2OS3	C1COCCN1SSC2=NC3=CC=CC=C3S2	165.97906; 283.00390	40.36; 100.00	32.98044; 165.97906	7.16; 100.00	134.00699; 165.97906; 197.95114	50.03; 100.00; 32.86
589	178.12374	179.1310142	C11H17NO	CCN(CCO)C1=CC=CC(=C1)C	134.09752; 178.12374	16.31; 100.00	42.03492; 106.06622; 118.06622; 120.08187; 132.08187; 134.09752; 160.11317; 178.12374	28.71; 34.22; 46.19; 26.22; 33.41; 100.00; 21.44; 86.00	40.01927; 42.03492; 91.05532; 106.06622; 118.06622; 120.08187; 130.06622; 132.08187; 134.09752	27.93; 76.31; 38.39; 27.04; 100.00; 33.04; 35.69; 29.40; 20.99
590	215.14414	216.1514153	C15H20O	CCCCCCC(=CC1=CC=CC=C1)C=O	187.14922; 215.14414	78.13; 100.00	91.05532; 183.11792; 185.13357; 187.14922; 197.13357; 215.14414	13.35; 4.82; 5.11; 12.13; 4.11; 100.00	55.01894; 65.00329; 65.03967; 67.01894; 67.05532; 69.03459; 77.03967; 91.05532; 93.07097; 101.03967; 103.05532; 105.07097; 115.05532; 117.07097; 119.08662; 127.05532; 129.07097; 131.05024; 131.08662; 141.07097; 143.08662; 145.10227; 157.10227; 159.11792; 171.11792	8.21; 15.72; 25.95; 15.94; 9.32; 10.84; 23.13; 100.00; 12.41; 9.93; 45.39; 10.86; 31.88; 28.83; 8.23; 7.71; 41.36; 7.39; 18.13; 20.28; 43.74; 11.16; 26.87; 9.67; 7.92
591	232.04377	233.0510498	C12H11NO2S	C1=CC=C(C=C1)S(=O)(=O)C2=CC=CC=C2N	206.02812; 232.04377	0.28; 100.00	92.05057; 232.04377	9.30; 100.00	64.01927; 77.03967; 92.05057; 141.00157; 153.99682; 156.01247; 165.00157; 179.01722; 180.01247; 189.00157; 204.01247; 206.02812; 232.04377	21.46; 17.79; 43.20; 84.88; 16.83; 13.37; 19.54; 16.53; 100.00; 24.92; 28.38; 74.40; 25.02
592	253.06926	254.0765362	C16H14OS	CC(C)C1=CC2=C(C=C1)SC3=CC=CC=C3C2=O	251.05361; 253.06926	4.79; 100.00	251.05361; 253.06926	2.64; 100.00	134.99101; 149.04304; 161.00666; 175.02231; 177.03796; 185.00666; 187.02231; 211.02231; 225.07434; 227.05361; 237.03796; 253.06926	12.29; 18.77; 11.92; 18.83; 14.32; 56.17; 13.24; 22.57; 100.00; 26.30; 17.43; 32.20
593	122.06114	123.0684139	C7H9NO	C1=CN=CC=C1CCO	92.05057; 122.06114	79.73; 100.00	92.05057; 104.05057	100.00; 9.40	40.01927; 64.01927; 78.03492; 92.05057; 104.05057	35.13; 41.83; 77.35; 100.00; 45.52
594	116.10809	117.1153641	C6H15NO	CC(C)(C)NCCO	86.09752; 116.10809	6.52; 100.00	43.01894; 116.10809	12.53; 100.00	40.01927; 43.01894; 56.05057; 72.08187; 98.09752	40.35; 100.00; 19.50; 24.92; 22.70
595	184.1343	185.1415788	C10H19NO2	CC(=C)C(=O)OCCNC(C)(C)C	85.02950; 116.10809; 184.13430	27.00; 44.20; 100.00	41.03967; 85.02950; 114.09244; 116.10809	9.78; 100.00; 33.71; 17.33	40.01927; 41.03967; 42.03492; 85.02950; 96.08187; 98.09752	26.66; 66.30; 56.86; 100.00; 13.20; 20.64
596	236.96204	237.9693117	C9H6N2S3	C1=CC=C2C(=C1)N=C(S2)SCSC#N	101.94776; 236.96203	100.00; 38.27	57.97569; 165.97906	100.00; 12.59	57.97569; 165.97906	100.00; 22.99
597	239.99477	241.0020487	C7H6F3NO3S	C1=CC=C(C(=C1)OC(F)(F)F)S(=O)(=O)N	161.02197; 239.99477	28.30; 100.00	77.96552; 239.99477	100.00; 27.68	63.02402; 77.96552; 79.98117; 84.99067; 108.99067; 117.99682; 141.99682; 161.02197; 239.99477	26.14; 100.00; 44.39; 19.74; 36.43; 17.10; 48.99; 39.58; 60.98
598	214.06403	215.0713064	C10H14ClNO2	C1=CC(=CC(=C1)Cl)N(CCO)CCO	152.02725; 196.05347; 214.06403	8.34; 21.14; 100.00	34.96940; 138.01160; 140.02725; 152.02725; 154.04290; 166.04290; 168.05855; 170.03782; 184.05347; 196.05347; 212.04838; 214.06403	32.54; 9.84; 35.18; 23.86; 28.95; 20.92; 15.01; 13.17; 14.21; 44.50; 13.74; 100.00	34.96940; 43.01894; 70.02984; 72.04549; 111.00070; 138.01160; 140.02725; 152.02725; 154.04290; 166.04290; 180.02217; 182.03782	100.00; 21.84; 14.68; 9.34; 90.64; 26.31; 16.61; 16.98; 19.35; 28.24; 9.07; 14.92
599	167.0206	168.027872	C5H12O2S2	C(CSCSCCO)O	58.99609; 74.99101; 76.95252; 77.00666; 78.96817	100.00; 25.37; 35.06; 43.73; 20.16	76.95252; 78.96817	100.00; 86.94	32.98044; 56.98044; 58.99609; 74.99101	70.81; 26.76; 100.00; 48.52
600	249.17075	250.1780239	C12H26O5	CCC(CO)(CO)COCC(CC)(CO)CO	131.07137; 133.08702; 219.16018; 249.17075	14.82; 41.58; 16.59; 100.00	101.06080; 103.07645; 115.07645; 131.07137; 133.08702; 231.16018; 249.17075	28.66; 34.03; 73.84; 41.10; 100.00; 17.13; 28.86	71.05024; 73.06589; 83.05024; 85.06589; 99.04515; 101.06080; 103.07645; 115.07645; 131.07137	86.28; 62.83; 20.26; 100.00; 49.75; 21.97; 55.79; 25.03; 32.15
601	300.2908	301.2980795	C18H39NO2	CCCCCCCCCCCCCCN(CCO)CCO	210.22272; 256.26459; 300.29080	16.02; 78.65; 100.00	60.04549; 238.25402; 254.24894; 256.26459; 268.26459; 270.28024; 282.28024; 298.27515; 300.29080	9.05; 17.27; 37.78; 100.00; 15.62; 29.08; 39.07; 8.12; 72.14	43.01894; 56.01419; 58.02984; 60.04549; 70.02984; 72.04549; 74.06114; 86.06114; 88.07679; 114.09244; 210.22272; 212.23837; 224.23837; 226.25402; 238.25402; 240.26967; 252.23329; 252.26967; 254.24894; 256.26459; 268.26459; 270.28024; 282.28024	81.12; 14.40; 74.82; 91.02; 18.88; 16.08; 38.41; 19.00; 37.74; 15.14; 42.93; 25.72; 43.71; 44.56; 83.64; 29.41; 11.75; 15.22; 30.60; 100.00; 17.61; 17.95; 27.74
602	235.16633	236.1736073	C10H24N2O4	C(CN(CCO)CCO)N(CCO)CCO	86.06114; 104.07170; 116.07170; 217.15577; 235.16633	4.00; 4.44; 4.56; 20.21; 100.00	86.06114; 98.06114; 100.07679; 104.07170; 116.07170; 130.08735; 159.11390; 173.12955; 187.14520; 191.14012; 203.14012; 205.15577; 217.15577; 235.16633	28.65; 24.37; 38.66; 29.65; 17.50; 17.12; 31.46; 37.77; 65.04; 28.65; 20.16; 50.69; 58.98; 100.00	43.01894; 58.02984; 60.04549; 70.02984; 74.06114; 86.06114; 88.07679; 100.07679; 145.09825	87.06; 100.00; 40.49; 22.56; 68.72; 45.55; 65.05; 27.00; 25.28
603	264.95954	265.966813	C10H9Cl3O2	CC(=O)OC(C1=CC=CC=C1)C(Cl)(Cl)Cl	77.03967; 264.95954	4.57; 100.00	105.03459; 222.94897; 264.95954	15.22; 35.53; 100.00	41.00329; 59.01385; 116.90711; 186.97229; 220.93332; 222.94897; 238.94389; 264.95954	16.84; 18.16; 100.00; 44.56; 13.25; 23.79; 38.83; 19.71
604	159.91292	160.920197	C2H2Cl3NO	C(=O)(C(Cl)(Cl)Cl)N	41.99854; 159.91292	0.30; 100.00	116.90711; 159.91292	4.70; 100.00	41.99854; 159.91292	100.00; 9.91
605	99.00632	100.0135992	C2H3F3O	C(C(F)(F)F)O	79.00009; 99.00632	5.49; 100.00	18.99895; 99.00632	100.00; 10.34	79.00009; 99.00632	2.57; 100.00
606	636.52896	637.53624	C12H4Br6O	C1=C(C(=CC(=C1Br)Br)Br)OC2=CC(=C(C=C2Br)Br)Br	532.60280; 636.52896	0.02; 100.00	532.60280; 636.52896	2.08; 100.00	350.76612; 636.52896	100.00; 33.75
607	356.83714	357.844416	C12H4Cl6	C1=C(C(=CC(=C1Cl)Cl)Cl)C2=CC(=C(C=C2Cl)Cl)Cl	202.92276; 356.83714	0.07; 100.00	296.86046; 356.83714	3.26; 100.00	202.92276; 356.83714	100.00; 71.37
608	558.61845	559.62573	C12H5Br5O	C1=CC(=C(C=C1Br)Br)OC2=CC(=C(C=C2Br)Br)Br	454.69229; 558.61845	0.23; 100.00	454.69229; 558.61845	3.29; 100.00	78.91889; 272.85561; 326.76612; 350.76612; 558.61845	31.51; 100.00; 28.10; 65.42; 67.40
610	480.70794	481.71522	C12H6Br4O	C1=CC(=C(C=C1Br)Br)OC2=C(C=C(C=C2)Br)Br	454.69229; 480.70794	0.38; 100.00	376.78177; 480.70794	5.23; 100.00	78.91889; 248.85561; 272.85561; 478.69229; 480.70794	41.04; 36.21; 100.00; 13.45; 49.36
611	245.04555	246.0528234	C13H10O5	C1=CC(=C(C=C1O)O)C(=O)C2=C(C=C(C=C2)O)O	135.00877; 245.04555	74.74; 100.00	109.02950; 135.00877; 175.04007; 177.01933; 199.04007; 201.01933; 245.04555	11.52; 100.00; 11.26; 8.64; 8.49; 7.72; 22.54	41.00329; 65.00329; 67.01894; 81.03459; 92.99820; 107.01385; 109.02950; 133.02950; 135.00877; 161.02442; 175.04007; 199.04007; 201.01933; 203.03498	88.78; 64.61; 25.96; 38.91; 41.82; 93.78; 100.00; 72.80; 42.13; 62.43; 43.08; 83.73; 66.13; 25.00
612	143.10775	144.1150297	C8H16O2	CC1(C(C(C1O)(C)C)O)C	69.03459; 143.10775	2.42; 100.00	69.03459; 71.05024; 113.09719; 125.09719; 127.07645; 143.10775	32.41; 16.09; 10.05; 25.11; 10.93; 100.00	53.00329; 55.01894; 69.03459; 71.05024; 73.06589; 97.10227; 109.06589; 115.11284; 143.10775	33.32; 12.20; 100.00; 60.34; 14.77; 12.67; 12.03; 15.87; 17.88
613	139.07645	140.0837296	C8H12O2	CC1(C(=O)C(C1=O)(C)C)C	69.03459; 139.07645	7.37; 100.00	69.03459; 111.08154; 139.07645	88.09; 17.08; 100.00	53.00329; 69.03459; 123.04515; 139.07645	17.05; 100.00; 39.19; 45.55
614	220.93332	221.940598	C8H5Cl3O	C1=CC(=C(C=C1Cl)Cl)C(=O)CCl	144.96173; 220.93332	23.10; 100.00	144.96173; 220.93332	54.87; 100.00	34.96940; 74.96432; 144.96173; 160.95664; 202.92276; 220.93332	43.48; 27.38; 32.21; 35.55; 81.89; 100.00
615	145.1234	146.1306798	C8H18O2	CC(C)C(C(C)(C)CO)O	127.11284; 145.12340	8.05; 100.00	41.03967; 43.05532; 71.05024; 101.06080; 125.09719; 127.11284; 143.10775; 145.12340	19.33; 21.78; 77.85; 100.00; 27.23; 50.65; 26.27; 94.80	43.05532; 55.01894; 57.03459; 69.03459; 71.05024; 73.06589	8.68; 100.00; 16.51; 11.89; 40.27; 11.56
616	285.20713	286.2144094	C16H30O4	CC(C)C(C(C)(C)COC(=O)C(C)C)OC(=O)C(C)C	127.11284; 129.12849; 143.10775; 215.16527; 285.20713	16.61; 17.28; 24.14; 77.95; 100.00	85.02950; 87.04515; 113.09719; 115.11284; 127.11284; 129.12849; 141.09210; 143.10775; 145.12340; 171.10267; 197.15470; 199.17035; 215.16527; 285.20713	12.48; 100.00; 9.54; 9.93; 19.75; 13.40; 18.89; 46.47; 11.07; 11.74; 9.71; 14.28; 68.56; 38.42	69.03459; 85.02950; 87.04515; 97.10227; 99.11792; 127.11284; 129.12849; 141.09210; 143.10775; 155.10775; 215.16527; 269.17583	9.73; 48.33; 100.00; 20.80; 11.29; 15.42; 58.02; 15.33; 9.76; 6.72; 14.78; 6.47
617	215.16527	216.1725446	C12H24O3	CC(C)C(C(C)(C)COC(=O)C(C)C)O	127.11284; 129.12849; 143.10775; 145.12340; 215.16527	18.10; 38.90; 11.37; 36.60; 100.00	69.03459; 71.01385; 71.05024; 85.02950; 87.04515; 127.11284; 141.09210; 143.10775; 145.12340; 215.16527	6.40; 16.20; 19.99; 8.12; 100.00; 8.28; 10.37; 12.97; 17.06; 27.12	43.05532; 68.99820; 71.01385; 71.05024; 73.06589; 85.02950; 87.04515; 97.06589; 99.04515; 99.08154; 113.09719; 129.09210; 145.12340	12.48; 8.70; 12.14; 100.00; 11.12; 74.36; 41.74; 11.95; 19.87; 8.63; 16.97; 9.23; 8.67
618	113.13357	114.1408506	C8H18	CC(C)CC(C)(C)C	111.11792; 113.13357	7.37; 100.00	111.11792; 113.13357	100.00; 74.95	97.10227; 113.13357	57.36; 100.00
619	353.17583	354.1831093	C22H26O4	CC(C)C(C(C)(C)COC(=O)C1=CC=CC=C1)OC(=O)C2=CC=CC=C2	231.13905; 353.17583	19.62; 100.00	77.03967; 121.02950; 231.13905; 351.16018; 353.17583	63.10; 67.49; 55.06; 43.00; 100.00	77.03967; 97.10227; 105.03459; 121.02950; 127.11284; 351.16018	100.00; 5.76; 4.57; 13.17; 4.77; 6.85
620	318.93688	319.944159	C12H8Cl4N2	C1=C(C(=CC(=C1Cl)N)Cl)C2=CC(=C(C=C2Cl)N)Cl	34.96940; 318.93688	42.43; 100.00	34.96940; 282.96020	100.00; 27.58	34.96940; 171.97263	100.00; 3.80
621	362.95186	363.95914	C15H12Cl4O2	CC(C)(C1=CC(=C(C(=C1)Cl)O)Cl)C2=CC(=C(C(=C2)Cl)O)Cl	160.95664; 362.95186	0.56; 100.00	200.98794; 362.95186	3.83; 100.00	160.95664; 184.95664; 200.98794; 286.98027; 346.92056; 362.95186	77.84; 35.29; 38.88; 27.42; 81.66; 100.00
622	156.13939	157.1466642	C9H19NO	CC1(CC(CC(N1)(C)C)O)C	138.12882; 156.13939	0.66; 100.00	138.12882; 156.13939	100.00; 56.43	43.01894; 56.05057; 122.09752; 138.12882; 154.12374; 156.13939	24.34; 9.84; 100.00; 62.15; 7.77; 34.66
623	154.12374	155.1310142	C9H17NO	CC1(CC(=O)CC(N1)(C)C)C	97.06589; 154.12374	1.46; 100.00	112.11317; 154.12374	50.02; 100.00	40.01927; 41.00329; 56.05057; 57.03459; 138.09244; 154.12374	24.18; 77.04; 100.00; 26.70; 20.78; 40.45
624	155.15537	156.1626486	C9H20N2	CC1(CC(CC(N1)(C)C)N)C	138.12882; 155.15537	0.33; 100.00	138.12882; 155.15537	24.15; 100.00	112.11317; 122.09752; 137.10842; 138.12882; 153.13972; 155.15537	13.56; 100.00; 11.01; 75.34; 18.12; 69.67
625	161.12955	162.1368278	C7H18N2O2	C(CN)CN(CCO)CCO	115.08769; 117.10334; 161.12955	11.05; 100.00; 90.33	43.01894; 45.03459; 99.09277; 115.08769; 117.10334; 125.10842; 129.10334; 131.11899; 143.11899; 161.12955	10.53; 13.88; 13.89; 100.00; 58.62; 21.33; 33.80; 19.64; 44.83; 46.98	43.01894; 44.05057; 45.03459; 56.01419; 58.02984; 60.04549	100.00; 12.95; 19.15; 9.02; 33.24; 28.86
626	197.08193	198.0892089	C10H14O4	C1=CC(=CC=C1OCCO)OCCO	109.02950; 135.04515; 179.07137; 197.08193	12.91; 16.74; 8.58; 100.00	43.01894; 107.01385; 109.02950; 135.04515	21.97; 35.26; 100.00; 51.56	43.01894; 79.01894; 93.03459; 107.01385; 109.02950; 123.04515; 125.06080; 135.04515	39.92; 29.22; 33.39; 39.60; 100.00; 92.06; 25.68; 29.20
627	197.08193	198.0892089	C10H14O4	C1=CC(=CC(=C1)OCCO)OCCO	109.02950; 135.04515; 153.05572; 179.07137; 197.08193	44.06; 34.41; 19.05; 16.42; 100.00	43.01894; 93.03459; 109.02950; 135.04515	20.76; 12.62; 100.00; 26.71	43.01894; 65.03967; 93.03459; 109.02950; 123.04515; 135.04515	79.42; 24.30; 46.02; 100.00; 69.86; 54.59
628	255.16018	256.1674592	C14H24O4	C1CC(CCC1COCC2CO2)COCC3CO3	127.11284; 199.13397; 255.16018	8.70; 33.23; 100.00	55.01894; 125.09719; 141.09210; 143.10775; 199.13397; 255.16018	32.22; 73.50; 50.10; 100.00; 29.07; 35.65	41.00329; 55.01894; 71.01385; 73.02950; 141.09210; 143.10775; 227.12888; 253.14453	99.87; 30.47; 69.43; 27.30; 100.00; 36.48; 21.09; 82.22
629	147.1139	148.1211778	C6H16N2O2	C(COCCOCCN)N	58.02984; 60.04549; 147.11390	89.61; 100.00; 98.93	58.02984; 60.04549	100.00; 77.38	42.03492; 43.01894; 58.02984; 60.04549; 61.02950	26.96; 50.30; 100.00; 54.05; 29.85
630	181.03625	182.043522	C6H14O2S2	C(COCCS)OCCS	43.01894; 87.04515; 113.06080; 147.04852; 181.03625	16.96; 100.00; 32.62; 72.60; 26.59	32.98044; 43.01894; 74.99101; 77.00666	100.00; 74.61; 60.30; 87.35	32.98044; 58.99609; 77.00666	100.00; 56.67; 95.50
631	191.13022	192.1374965	C10H16N4	CCC(C)(C#N)N=NC(C)(CC)C#N	110.07237; 191.13022	7.01; 100.00	67.03017; 95.06147; 97.07712	41.58; 60.52; 100.00	67.03017; 76.01927; 82.06622; 93.04582; 95.06147; 97.07712; 108.05672; 110.07237	26.41; 13.54; 16.23; 84.68; 100.00; 27.12; 13.47; 20.61
632	155.06147	156.0687483	C10H8N2	C1=CC=NC(=C1)C2=CC=CC=N2	103.03017; 155.06147	0.43; 100.00	103.03017; 155.06147	5.05; 100.00	49.00837; 51.02402; 78.03492; 102.03492; 103.03017; 104.05057; 129.04582; 155.06147; 0	20.66; 25.57; 17.26; 31.29; 100.00; 51.13; 39.89; 56.60; 155.0614718039
633	265.01924	266.0265204	C14H12Cl2O	C1=CC(=CC=C1C(CO)C2=CC=C(C=C2)Cl)Cl	235.00868; 265.01924	69.69; 100.00	34.96940; 235.00868; 247.00868; 265.01924	11.48; 100.00; 15.80; 24.19	34.96940; 111.00070; 135.00070; 235.00868; 247.00868	97.62; 57.62; 28.51; 100.00; 16.57
634	314.97519	315.982463	C14H11Cl3O2	C1=CC(=CC=C1C(C2=CC=C(C=C2)O)C(Cl)(Cl)Cl)O	278.99851; 314.97519	1.06; 100.00	220.93332; 278.99851; 314.97519	27.40; 31.85; 100.00	93.03459; 195.04515; 197.06080; 220.93332; 246.94897; 278.99851; 314.97519	100.00; 38.19; 18.25; 15.93; 11.11; 19.72; 15.47
635	213.14962	214.1568946	C12H22O3	CCC(CO)(COCC=C)COCC=C	57.03459; 133.08702; 141.09210; 173.11832; 183.13905; 213.14962	19.67; 4.03; 4.48; 19.24; 12.36; 100.00	39.02402; 55.01894; 57.03459; 125.09719; 143.10775; 213.14962	2.53; 11.18; 100.00; 3.99; 4.31; 4.70	39.02402; 41.03967; 53.00329; 55.01894; 57.03459; 69.03459; 71.05024; 83.05024; 85.06589; 121.06589; 125.06080; 129.09210; 139.07645; 187.13397	7.59; 6.77; 11.34; 55.12; 100.00; 10.46; 7.42; 6.16; 19.72; 8.43; 14.59; 16.19; 13.17; 7.17
636	397.08188	398.0891521	C15H26O6S3	CCC(COC(=O)CCS)(COC(=O)CCS)COC(=O)CCS	32.98044; 105.00157; 189.05909; 203.07474; 221.08530; 275.09587; 309.08359; 397.08188	30.91; 85.22; 24.53; 23.02; 25.24; 84.18; 100.00; 24.61	32.98044; 105.00157; 189.05909; 191.07474; 219.06965; 221.08530; 275.09587; 309.08359	100.00; 61.40; 10.99; 7.79; 39.61; 29.78; 7.91; 22.92	32.98044; 56.98044; 58.99609; 86.99101; 105.00157; 159.04852; 173.06417; 189.05909; 219.06965; 221.08530; 245.08530; 249.08022; 309.08359; 337.07850; 349.07850; 351.09415	100.00; 8.29; 26.90; 13.78; 51.39; 27.08; 54.90; 78.97; 12.42; 13.34; 7.86; 12.83; 12.95; 12.39; 13.28; 10.20
637	223.14922	224.1565006	C17H20	CC1=CC=C(C=C1)C(C)(C)C2=CC=C(C=C2)C	91.05532; 223.14922	5.11; 100.00	197.13357; 223.14922	30.70; 100.00	91.05532; 115.05532; 171.11792; 197.13357; 207.11792; 221.13357	86.90; 100.00; 33.31; 29.53; 20.90; 17.20
638	455.08934	456.0966202	C26H20N2O2S2	C1=CC=C(C=C1)C(=O)NC2=CC=CC=C2SSC3=CC=CC=C3NC(=O)C4=CC=CC=C4	228.04886; 455.08934	33.97; 100.00	77.03967; 150.00191; 226.03321; 228.04886; 455.08934	21.22; 25.05; 20.47; 100.00; 60.73	77.03967; 124.02264; 150.00191; 228.04886; 260.02093; 268.02601; 284.02093; 429.07369; 451.05804; 453.07369	100.00; 8.84; 6.86; 9.69; 11.21; 7.24; 15.21; 7.57; 9.83; 9.09
639	238.84611	239.85339	C3H2Br2N2O	C(#N)C(C(=O)N)(Br)Br	41.99854; 238.84611	1.22; 100.00	41.99854; 238.84611	60.43; 100.00	41.99854; 195.84030	100.00; 0.42
640	125.95189	126.9591691	C2H3Cl2NO	C(C(=O)N)(Cl)Cl	41.99854; 125.95189	9.11; 100.00	41.99854; 125.95189	32.96; 100.00	41.99854; 82.94608	100.00; 0.91
641	220.99303	222.0003056	C12H8Cl2	C1=CC=C(C(=C1)C2=CC=CC=C2Cl)Cl	170.97738; 220.99303	1.22; 100.00	170.97738; 220.99303	4.93; 100.00	34.96940; 135.00070; 194.97738; 220.99303	95.95; 25.84; 32.16; 100.00
642	110.97738	111.9846556	C3H6Cl2	CC(C)(Cl)Cl	75.00070; 110.97738	29.63; 100.00	75.00070; 110.97738	1.36; 100.00	34.96940; 110.97738	1.22; 100.00
643	273.07685	274.0841235	C15H14O5	COC1=CC(=C(C=C1)C(=O)C2=C(C=C(C=C2)OC)O)O	149.02442; 273.07685	4.64; 100.00	119.01385; 121.02950; 123.04515; 135.00877; 149.02442; 189.05572; 273.07685	85.10; 39.76; 13.87; 19.55; 100.00; 15.88; 87.54	41.00329; 55.01894; 93.03459; 95.05024; 107.01385; 109.02950; 119.01385; 121.02950; 123.04515; 135.00877; 147.04515; 175.04007; 177.05572; 187.04007; 189.05572; 201.05572; 213.05572; 215.03498; 217.05063; 229.05063	45.54; 17.16; 33.78; 12.30; 19.54; 16.52; 22.49; 28.03; 58.01; 10.60; 13.25; 100.00; 26.02; 12.83; 30.12; 32.39; 22.51; 11.87; 10.97; 21.39
644	243.06628	244.0735589	C14H12O4	COC1=CC(=C(C=C1)C(=O)C2=CC=CC=C2O)O	149.02442; 243.06628	38.77; 100.00	93.03459; 119.01385; 121.02950; 149.02442; 243.06628	65.33; 100.00; 37.92; 74.21; 40.48	41.00329; 55.01894; 65.00329; 65.03967; 67.01894; 89.00329; 91.01894; 93.03459; 119.01385; 121.02950; 123.04515; 129.03459; 145.02950; 171.04515; 175.04007; 183.04515; 185.02442; 189.05572; 199.04007; 213.05572	18.73; 7.50; 19.25; 14.70; 9.57; 8.31; 25.46; 100.00; 24.24; 12.62; 20.51; 6.82; 31.59; 6.63; 15.58; 7.44; 6.65; 7.68; 6.65; 7.14
645	213.05572	214.0629942	C13H10O3	C1=CC=C(C(=C1)C(=O)C2=CC=CC=C2O)O	119.01385; 213.05572	100.00; 58.39	93.03459; 119.01385	73.08; 100.00	63.02402; 65.00329; 65.03967; 67.01894; 89.00329; 91.01894; 93.03459; 117.03459; 119.01385; 145.02950; 147.04515; 159.04515; 167.05024; 183.04515	57.91; 18.04; 17.59; 30.22; 81.80; 100.00; 55.21; 21.04; 51.23; 61.06; 30.48; 33.98; 19.16; 27.43
646	255.10267	256.1099444	C16H16O3	COC(C1=CC=CC=C1)(C(=O)C2=CC=CC=C2)OC	105.03459; 255.10267	15.92; 100.00	105.03459; 195.08154; 197.09719; 225.09210	27.81; 86.40; 30.92; 100.00	77.03967; 121.06589; 147.04515; 209.06080	41.35; 24.21; 48.17; 100.00
647	103.07645	104.0837296	C5H12O2	CC(C)(OC)OC	71.05024; 103.07645	100.00; 46.72	55.01894; 71.05024	17.38; 100.00	55.01894; 71.05024	78.36; 100.00
648	162.09244	163.099714	C10H13NO	CC1(CC2=C(O1)C(=CC=C2)N)C	120.04549; 162.09244	1.46; 100.00	122.06114; 162.09244	11.75; 100.00	64.01927; 65.03967; 66.03492; 81.03459; 88.01927; 90.03492; 92.05057; 95.05024; 106.02984; 119.05024; 120.04549; 122.06114; 146.06114; 162.09244	32.67; 9.23; 18.30; 17.75; 24.79; 28.06; 18.76; 19.49; 34.70; 10.99; 100.00; 24.20; 22.13; 18.37
649	115.11284	116.1201151	C7H16O	CCC(C(C)(C)C)O	85.06589; 115.11284	1.79; 100.00	85.06589; 97.10227; 115.11284	64.76; 100.00; 83.46	41.00329; 57.03459; 57.07097; 69.03459; 85.06589; 97.10227; 113.09719; 115.11284	17.09; 100.00; 19.25; 25.76; 51.19; 18.52; 16.37; 26.60
650	85.10227	86.10955045	C6H14	CCC(C)(C)C	83.08662; 85.10227	3.44; 100.00	83.08662; 85.10227	28.10; 100.00	83.08662; 85.10227	4.72; 100.00
651	145.05063	146.0579088	C6H10O4	CC(C)(CC(=O)O)C(=O)O	59.01385; 101.06080; 145.05063	23.47; 48.22; 100.00	59.01385; 85.02950; 99.04515; 101.06080	22.28; 100.00; 23.95; 52.87	44.99820; 59.01385; 85.02950	98.69; 100.00; 46.44
652	115.07645	116.0837296	C6H12O2	CCC(C)(C)C(=O)O	87.04515; 115.07645	2.28; 100.00	71.08662; 115.07645	5.94; 100.00	44.99820; 97.06589	100.00; 0.59
653	159.06628	160.0735589	C7H12O4	CC(C)(CCC(=O)O)C(=O)O	115.07645; 159.06628	100.00; 12.12	67.05532; 111.04515; 113.06080; 115.07645	19.03; 14.53; 94.46; 100.00	44.99820; 55.01894; 68.99820; 71.01385; 73.02950; 85.02950; 95.05024; 97.06589; 99.04515; 113.06080	100.00; 25.14; 30.54; 36.21; 49.69; 20.75; 16.63; 13.48; 17.18; 13.02
654	103.07645	104.0837296	C5H12O2	CC(C)(CO)CO	73.06589; 103.07645	60.69; 100.00	71.05024; 73.06589; 103.07645	98.91; 52.78; 100.00	55.01894; 71.05024	100.00; 25.56
655	239.12888	240.1361591	C13H20O4	CC(=C)C(=O)OCC(C)(C)COC(=O)C(=C)C	101.06080; 169.08702; 171.10267	23.66; 31.02; 100.00	41.03967; 85.02950; 125.06080; 139.07645; 141.09210; 171.10267; 239.12888	23.46; 100.00; 22.97; 70.01; 72.58; 57.15; 46.07	41.03967; 55.05532; 69.03459; 71.05024; 85.02950; 99.04515; 101.06080; 139.07645	56.97; 15.46; 27.61; 33.43; 79.49; 100.00; 15.58; 22.36
656	101.0608	102.0680796	C5H10O2	CC(C)(C)C(=O)O	57.07097; 101.06080	0.16; 100.00	85.02950; 101.06080	2.64; 100.00	44.99820; 85.02950; 101.06080	57.81; 100.00; 65.98
657	119.02692	120.0341926	C5H9ClO	CC(C)(C)C(=O)Cl	34.96940; 119.02692	3.74; 100.00	34.96940; 119.02692	100.00; 24.48	34.96940; 119.02692	100.00; 0.17
658	89.01635	90.0236279	C4H7Cl	CC(=CCl)C	39.02402; 89.01635	0.08; 100.00	39.02402; 89.01635	6.41; 100.00	72.98505; 89.01635	21.55; 100.00
659	195.11792	196.1252005	C15H16	CC(C)(C1=CC=CC=C1)C2=CC=CC=C2	77.03967; 195.11792	7.12; 100.00	77.03967; 195.11792	17.85; 100.00	77.03967; 101.03967; 179.08662; 195.11792	100.00; 26.77; 27.66; 25.40
660	330.94976	331.957033	C14H8N2S4	C1=CC=C2C(=C1)N=C(S2)SSC3=NC4=CC=CC=C4S3	134.00699; 330.94976	0.69; 100.00	134.00699; 330.94976	27.27; 100.00	134.00699; 330.94976	100.00; 82.82
661	339.23295	340.2402303	C23H32O2	CC1=CC(=C(C(=C1)C(C)(C)C)O)CC2=C(C(=CC(=C2)C)C(C)(C)C)O	163.11284; 339.23295	15.10; 100.00	161.09719; 177.12849; 311.23804; 339.23295	9.71; 13.97; 9.86; 100.00	105.03459; 107.05024; 145.06589; 147.08154; 161.09719; 163.11284; 265.15979; 279.13905; 283.17035; 307.17035; 307.20674; 309.22239; 311.23804; 321.22239; 323.20165; 339.23295	22.85; 11.78; 27.32; 100.00; 42.50; 27.45; 17.20; 12.72; 9.31; 32.46; 33.24; 19.82; 15.20; 9.70; 50.44; 16.32
662	367.26425	368.2715304	C25H36O2	CCC1=CC(=C(C(=C1)C(C)(C)C)O)CC2=C(C(=CC(=C2)CC)C(C)(C)C)O	177.12849; 367.26425	5.80; 100.00	339.26934; 349.25369; 367.26425	4.87; 9.57; 100.00	121.06589; 149.09719; 159.08154; 161.09719; 163.11284; 173.09719; 175.11284; 177.12849; 187.11284; 265.15979; 267.17544; 269.19109; 323.20165; 325.21730; 335.23804; 337.25369; 339.26934; 349.25369; 351.23295; 367.26425	14.08; 19.73; 15.14; 87.12; 52.04; 15.90; 25.69; 15.89; 25.81; 16.39; 74.36; 100.00; 30.45; 17.48; 25.83; 32.91; 16.33; 38.52; 35.10; 30.08
663	103.08769	104.094963	C4H12N2O	C(COCCN)N	101.07204; 103.08769	51.76; 100.00	60.04549; 84.04549; 101.07204; 103.08769	13.13; 15.39; 100.00; 48.96	42.03492; 43.01894; 58.02984; 60.04549	97.47; 65.55; 100.00; 36.07
664	152.98719	153.9944638	C4H10S3	C(CSCCS)S	92.98382; 152.98719	23.22; 100.00	58.99609; 90.96817	86.79; 100.00	58.99609; 92.98382	44.41; 100.00
665	121.03287	122.0401507	C4H10O2S	C(CSCCO)O	58.99609; 74.99101; 77.00666; 121.03287	91.70; 69.40; 100.00; 55.02	32.98044; 58.99609; 74.99101	42.18; 33.66; 100.00	32.98044; 46.99609; 58.99609	31.79; 38.18; 100.00
666	158.09752	159.1047994	C11H13N	CC1=NC2=CC=CC=C2C1(C)C	142.06622; 158.09752	4.34; 100.00	142.06622; 158.09752	17.91; 100.00	116.05057; 142.06622; 158.09752	28.44; 100.00; 98.69
667	245.04555	246.0528234	C13H10O5	C1=CC(=CC=C1C(=O)C2=C(C(=C(C=C2)O)O)O)O	93.03459; 245.04555	2.15; 100.00	93.03459; 121.02950; 125.02442; 159.04515; 185.02442; 187.04007; 189.05572; 214.99860; 219.02990; 227.03498; 243.02990; 245.04555	30.37; 9.96; 6.38; 8.42; 7.40; 12.55; 7.62; 6.61; 6.76; 9.40; 8.01; 100.00	65.00329; 65.03967; 67.01894; 77.03967; 91.01894; 93.03459; 117.03459; 121.02950; 129.03459; 145.02950; 157.02950; 159.04515; 161.02442; 175.00368; 177.01933; 185.02442; 187.04007; 199.04007; 213.01933; 243.02990	8.48; 13.22; 5.39; 10.15; 6.21; 100.00; 11.26; 7.82; 11.71; 28.36; 5.31; 19.02; 7.08; 10.99; 29.19; 18.89; 15.38; 9.03; 7.57; 38.04
668	245.04555	246.0528234	C13H10O5	C1=CC(=C(C=C1C(=O)C2=C(C=C(C=C2)O)O)O)O	135.00877; 245.04555	7.05; 100.00	107.01385; 109.02950; 135.00877; 149.02442; 161.02442; 175.00368; 175.04007; 189.05572; 199.04007; 201.01933; 203.03498; 217.05063; 245.04555	13.90; 40.96; 37.07; 12.73; 15.82; 10.50; 16.79; 10.67; 10.03; 15.98; 44.99; 20.83; 100.00	41.00329; 51.02402; 65.00329; 67.01894; 79.01894; 107.01385; 109.02950; 133.02950; 137.02442; 149.02442; 159.04515; 161.02442; 163.04007; 171.04515; 175.04007; 187.04007; 189.05572; 199.04007; 201.01933; 203.03498; 215.03498; 243.02990	45.76; 19.90; 14.63; 11.84; 17.69; 12.01; 69.64; 13.27; 14.15; 21.39; 12.43; 100.00; 25.85; 17.56; 14.45; 43.57; 29.47; 15.44; 16.48; 17.61; 11.45; 73.91
670	228.8787	229.885975	C6H2Cl4O	C1=C(C(=C(C(=C1Cl)Cl)Cl)Cl)O	134.94099; 228.87870	0.02; 100.00	134.94099; 228.87870	13.96; 100.00	34.96940; 228.87870	90.78; 100.00
671	228.8787	229.885975	C6H2Cl4O	C1=C(C(=C(C(=C1Cl)Cl)Cl)O)Cl	134.94099; 228.87870	0.28; 100.00	200.88378; 228.87870	3.10; 100.00	34.96940; 228.87870	53.13; 100.00
672	220.93332	221.940598	C8H5Cl3O	CC(=O)C1=C(C(=C(C=C1)Cl)Cl)Cl	178.92276; 220.93332	23.81; 100.00	178.92276; 220.93332	56.53; 100.00	178.92276; 202.92276; 220.93332	78.16; 34.24; 100.00
673	194.91767	195.924948	C6H3Cl3O	C1=CC(=C(C(=C1O)Cl)Cl)Cl	166.92276; 194.91767	0.49; 100.00	166.92276; 194.91767	19.40; 100.00	34.96940; 74.96432; 194.91767	40.26; 17.84; 100.00
674	229.05063	230.0579088	C13H10O4	C1=CC=C(C=C1)C(=O)C2=C(C(=C(C=C2)O)O)O	151.00368; 229.05063	3.35; 100.00	77.03967; 105.03459; 119.05024; 125.02442; 143.05024; 169.02950; 171.04515; 173.06080; 175.00368; 227.03498; 229.05063	10.56; 6.22; 5.06; 8.28; 5.70; 6.41; 10.39; 5.91; 5.36; 7.25; 100.00	41.00329; 56.99820; 65.00329; 77.03967; 97.02950; 129.03459; 131.05024; 143.05024; 145.02950; 169.02950; 171.04515; 227.03498	10.67; 11.11; 31.16; 100.00; 7.77; 47.49; 19.64; 50.12; 23.78; 43.40; 18.66; 71.53
676	228.8787	229.885975	C6H2Cl4O	C1=C(C(=C(C(=C1Cl)Cl)O)Cl)Cl	228.8787	100	152.90711; 228.87870	1.61; 100.00	74.96432; 228.87870	5.01; 100.00
677	213.87903	214.88631	C5HCl4N	C1=C(C(=NC(=C1Cl)Cl)Cl)Cl	213.87903	100	213.87903	100	213.87903	100
678	194.91767	195.924948	C6H3Cl3O	C1=C(C=C(C(=C1O)Cl)Cl)Cl	152.90711; 194.91767	0.38; 100.00	152.90711; 194.91767	8.40; 100.00	41.00329; 194.91767	51.95; 100.00
679	498.71945	499.7267	C7H3I3O2	C1=C(C=C(C(=C1C(=O)O)I)I)I	454.72962; 498.71945	24.99; 100.00	454.72962; 498.71945	100.00; 4.14	454.72962; 498.71945	100.00; 19.03
680	151.07645	152.0837296	C9H12O2	CC1=CC(=C(C(=C1O)C)C)O	133.06589; 151.07645	1.93; 100.00	97.06589; 133.06589; 135.04515; 149.06080; 151.07645	4.25; 20.88; 9.08; 6.39; 100.00	39.02402; 41.00329; 51.02402; 53.00329; 55.01894; 65.00329; 67.01894; 69.03459; 77.00329; 79.01894; 79.05532; 95.05024; 97.06589; 133.06589; 135.04515; 149.06080; 151.07645	22.39; 86.26; 35.42; 29.05; 17.87; 19.88; 100.00; 37.13; 22.00; 24.63; 51.40; 20.79; 48.24; 34.26; 25.39; 55.90; 22.50
681	135.08154	136.088815	C9H12O	CC1=CC(=C(C(=C1)O)C)C	81.03459; 135.08154	0.53; 100.00	65.03967; 79.05532; 81.07097; 105.07097; 107.05024; 107.08662; 117.07097; 135.08154	6.50; 11.93; 9.11; 5.28; 4.23; 9.96; 4.39; 100.00	41.00329; 63.02402; 65.00329; 65.03967; 91.05532; 105.03459; 119.05024; 135.08154	21.96; 35.21; 100.00; 45.13; 25.08; 18.68; 56.56; 39.07
682	121.07712	122.0843983	C7H10N2	CC1=CN=C(C(=N1)C)C	40.01927; 121.07712	6.52; 100.00	40.01927; 52.01927; 54.03492; 76.01927; 78.03492; 80.05057; 95.06147; 121.07712	60.75; 10.98; 25.45; 9.38; 16.86; 23.91; 10.54; 100.00	40.01927; 42.03492; 50.00362; 52.01927; 54.03492; 64.01927; 67.03017	89.06; 19.99; 100.00; 17.32; 16.54; 13.65; 13.43
683	222.91259	223.919862	C7H3Cl3O2	C1=CC(=C(C(=C1Cl)C(=O)O)Cl)Cl	178.92276; 222.91259	12.08; 100.00	178.92276; 222.91259	64.56; 100.00	178.92276; 222.91259	100.00; 13.05
684	194.91767	195.924948	C6H3Cl3O	C1=CC(=C(C(=C1Cl)O)Cl)Cl	118.94608; 194.91767	0.27; 100.00	34.96940; 194.91767	10.62; 100.00	34.96940; 74.96432; 194.91767	32.03; 12.67; 100.00
685	135.08154	136.088815	C9H12O	CC1=C(C(=C(C=C1)C)O)C	109.06589; 135.08154	1.52; 100.00	73.00837; 75.02402; 79.05532; 119.05024; 135.08154	6.15; 8.35; 7.49; 4.30; 100.00	49.00837; 51.02402; 53.00329; 55.01894; 65.03967; 67.05532; 73.00837; 75.02402; 77.03967; 79.05532; 81.07097; 91.05532; 103.05532; 107.08662; 119.05024; 135.08154	100.00; 38.24; 25.83; 21.67; 52.89; 31.84; 24.11; 30.53; 41.50; 51.16; 37.48; 64.23; 22.02; 29.65; 71.18; 77.49
686	318.88926	319.89654	C12H4Cl4O2	C1=C2C(=CC(=C1Cl)Cl)OC3=CC(=C(C=C3O2)Cl)Cl	258.91259; 318.88926	0.67; 100.00	258.91259; 318.88926	1.95; 100.00	258.91259; 318.88926	100.00; 33.41
687	117.03459	118.0418648	C8H6O	C1=CC=C2C(=C1)C=CO2	67.01894; 117.03459	0.44; 100.00	67.01894; 117.03459	1.22; 100.00	91.01894; 117.03459; 0	3.54; 100.00; 117.0345883599
688	89.0608	90.06807956	C4H10O2	CC(C(C)O)O	71.05024; 89.06080	1.79; 100.00	43.01894; 71.05024; 89.06080	100.00; 39.69; 62.71	43.01894; 45.03459	100.00; 4.17
689	85.0295	86.03677943	C4H6O2	CC(=O)C(=O)C	43.01894; 85.02950	15.05; 100.00	43.01894; 85.02950	69.77; 100.00	41.00329; 43.01894	39.26; 100.00
690	121.01512	122.0223927	C4H10S2	CC(C(C)S)S	87.02739; 121.01512	19.41; 100.00	87.02739; 121.01512	28.23; 100.00	58.99609; 121.01512	78.53; 100.00
691	121.07712	122.0843983	C7H10N2	CC1=C(C(=CC=C1)N)N	104.05057; 121.07712	5.78; 100.00	66.03492; 92.05057; 94.06622; 104.05057; 119.06147; 121.07712	5.73; 13.46; 5.46; 24.63; 8.80; 100.00	40.01927; 49.00837; 50.00362; 51.02402; 63.02402; 64.01927; 65.03967; 66.03492; 67.05532; 104.05057; 121.07712	94.02; 22.81; 17.37; 23.47; 29.33; 66.35; 30.24; 100.00; 17.41; 22.50; 16.29
692	214.87126	215.87854	C3H6Br2O	C(C(CBr)Br)O	78.91889; 214.87126	13.50; 100.00	78.91889; 120.92945	100.00; 9.17	78.91889; 120.92945	100.00; 6.85
693	228.85053	229.8578	C3H4Br2O2	C(C(C(=O)O)Br)Br	78.91889; 228.85053	7.76; 100.00	78.91889; 228.85053	100.00; 34.18	78.91889; 228.85053	100.00; 7.64
694	126.97229	127.9795702	C3H6Cl2O	C(C(CCl)Cl)O	76.97997; 126.97229	3.88; 100.00	34.96940; 76.97997	100.00; 9.07	34.96940; 76.97997	100.00; 13.43
695	108.96173	109.9690055	C3H4Cl2	C=C(CCl)Cl	34.96940; 108.96173	3.32; 100.00	34.96940; 108.96173	100.00; 13.46	34.96940; 72.98505	100.00; 0.09
696	261.85571	262.862988	C6H2Cl5N	C1=C(C=NC(=C1Cl)Cl)C(Cl)(Cl)Cl	261.85571	100	261.85571	100	261.85571	100
697	188.95156	189.9588348	C7H4Cl2O2	C1=CC(=C(C(=C1)Cl)Cl)C(=O)O	144.96173; 188.95156	100.00; 58.27	144.96173; 188.95156	100.00; 2.79	34.96940; 82.96940; 118.94608; 144.96173; 188.95156	94.49; 34.16; 31.80; 100.00; 41.02
698	124.99303	126.0003056	C4H8Cl2	CC(C(C)Cl)Cl	34.96940; 124.99303	17.74; 100.00	34.96940; 124.99303	100.00; 7.02	34.96940; 124.99303	100.00; 1.23
699	154.96721	155.9744848	C4H6Cl2O2	C1COC(C(O1)Cl)Cl	34.96940; 154.96721	27.12; 100.00	34.96940; 154.96721	100.00; 9.05	34.96940; 154.96721	100.00; 7.06
700	160.95664	161.9639201	C6H4Cl2O	C1=CC(=C(C(=C1)Cl)Cl)O	67.01894; 160.95664	1.89; 100.00	82.96940; 110.96432; 160.95664	26.58; 42.20; 100.00	34.96940; 41.00329; 65.00329	25.72; 51.27; 100.00
701	196.96788	197.9751535	C8H4Cl2N2	C1=CC=C2C(=C1)N=C(C(=N2)Cl)Cl	170.95223; 196.96788	0.02; 100.00	170.95223; 196.96788	0.36; 100.00	170.95223; 196.96788	34.39; 100.00
702	234.09965	235.1069247	C10H13N5O2	C1CC(OC1CO)N2C=NC3=C(N=CN=C32)N	134.04722; 234.09965	100.00; 22.63	105.02067; 134.04722	11.50; 100.00	92.02542; 105.02067; 107.03632; 134.04722	36.60; 27.34; 48.98; 100.00
703	210.08842	211.0956913	C9H13N3O3	C1CC(OC1CO)N2C=CC(=NC2=O)N	67.03017; 110.03599; 124.05164; 134.03599; 138.06729; 150.06729; 152.08294; 167.08260; 180.07785; 192.07785; 210.08841	6.12; 15.66; 8.83; 7.22; 8.12; 5.85; 5.53; 4.21; 18.67; 10.51; 100.00	40.01927; 41.99854; 65.01452; 67.01894; 67.03017; 93.04582; 94.04107; 110.03599; 114.05605; 116.08294; 134.03599; 136.05164; 192.07785; 210.08841	3.56; 34.69; 38.31; 4.35; 100.00; 6.29; 7.77; 29.19; 8.56; 10.74; 10.16; 8.61; 8.74; 5.49	40.01927; 41.01452; 41.99854; 43.01894; 55.01894; 57.03459; 65.01452; 66.03492; 67.01894; 67.03017; 69.00944; 69.03459; 81.03459; 93.04582; 95.02509; 96.05672; 106.02984; 107.06147; 109.04074; 110.03599; 114.05605; 122.02475; 123.05639; 124.05164; 126.05605; 137.07204; 169.06187; 178.06220; 180.07785; 192.07785; 208.07276	38.55; 12.85; 100.00; 14.62; 6.11; 13.47; 16.73; 13.63; 29.81; 80.57; 9.92; 31.96; 8.50; 9.11; 7.48; 7.42; 5.87; 6.15; 12.35; 39.75; 11.07; 6.78; 10.26; 6.09; 6.17; 18.62; 6.67; 5.82; 5.97; 6.50; 7.22
704	235.08366	236.0909403	C10H12N4O3	C1CC(OC1CO)N2C=NC3=C2N=CNC3=O	135.03123; 235.08366	69.51; 100.00	107.03632; 133.01558; 135.03123; 235.08366	15.16; 9.22; 100.00; 6.73	41.99854; 80.02542; 105.02067; 107.03632; 108.02034; 135.03123	100.00; 27.96; 18.29; 55.51; 63.63; 94.21
705	135.09277	136.1000484	C8H12N2	CCC1=NC=CN=C1CC	107.06147; 135.09277	19.66; 100.00	40.01927; 54.03492; 56.05057; 82.06622; 103.03017; 105.04582; 107.06147; 109.07712; 133.07712; 135.09277	39.46; 25.62; 24.56; 17.01; 16.56; 62.71; 100.00; 12.21; 16.96; 59.12	40.01927; 52.01927; 54.03492; 56.05057; 64.01927; 66.03492; 82.06622; 103.03017; 105.04582; 107.06147	100.00; 13.34; 21.96; 11.72; 9.32; 28.23; 19.26; 18.93; 24.54; 11.06
706	163.07645	164.0837296	C10H12O2	CC1(CC2=C(O1)C(=CC=C2)O)C	147.04515; 163.07645	0.88; 100.00	123.04515; 163.07645	15.56; 100.00	49.00837; 51.02402; 55.05532; 63.02402; 65.00329; 65.03967; 79.01894; 89.00329; 93.03459; 105.03459; 107.01385; 119.05024; 121.02950; 123.04515; 147.04515	15.95; 30.35; 15.22; 16.76; 19.67; 33.63; 22.34; 13.36; 28.77; 22.24; 61.84; 28.45; 100.00; 24.67; 14.02
707	159.06628	160.0735589	C7H12O4	CC(=C)C(=O)OCC(CO)O	59.01385; 85.02950; 89.02442; 91.04007	26.61; 100.00; 13.76; 11.17	41.03967; 43.01894; 59.01385; 73.02950; 85.02950	10.35; 16.29; 34.96; 37.21; 100.00	41.03967; 55.01894; 59.01385; 85.02950	100.00; 24.25; 46.17; 41.78
708	217.14453	218.1518092	C11H22O4	CCCCCCCC(=O)OCC(CO)O	59.01385; 73.02950; 89.02442; 91.04007; 125.09719; 217.14453	50.41; 28.48; 28.12; 35.10; 38.89; 100.00	43.01894; 57.03459; 59.01385; 73.02950; 75.04515; 107.08662; 125.09719; 143.10775	21.35; 96.93; 74.12; 54.79; 35.24; 26.14; 20.97; 100.00	41.00329; 44.99820; 57.03459; 59.01385; 65.03967; 67.01894; 67.05532; 71.01385; 73.02950; 91.04007; 99.04515; 101.06080; 113.06080; 115.07645; 123.08154; 125.09719; 127.07645; 127.11284; 141.09210; 143.10775	6.08; 19.93; 8.62; 65.94; 5.29; 5.43; 8.29; 8.00; 13.16; 6.27; 8.88; 12.38; 10.74; 12.64; 9.93; 100.00; 6.53; 17.00; 9.71; 17.91
709	260.02343	261.0307082	C9H11NO6S	COC1=CC(=CC(=C1OC)C(=O)O)S(=O)(=O)N	216.03360; 260.02343	14.32; 100.00	79.98117; 216.03360; 260.02343	24.18; 69.20; 100.00	77.96552; 79.98117	100.00; 82.29
710	85.10227	86.10955045	C6H14	CC(C)C(C)C	83.08662; 85.10227	16.88; 100.00	83.08662; 85.10227	45.05; 100.00	83.08662; 85.10227	24.93; 100.00
711	121.06589	122.0731649	C8H10O	CC1=C(C(=CC=C1)O)C	103.05532; 121.06589	1.59; 100.00	63.02402; 65.03967; 67.05532; 91.01894; 93.03459; 103.05532; 121.06589	5.39; 5.03; 7.26; 4.72; 4.87; 4.47; 100.00	41.00329; 49.00837; 51.02402; 63.02402; 65.00329; 65.03967; 67.01894; 67.05532; 121.06589	100.00; 20.81; 37.58; 74.10; 42.08; 74.67; 30.21; 29.86; 25.43
712	207.10267	208.1099444	C12H16O3	COCCC1=CC=C(C=C1)OCC2CO2	55.01894; 119.05024; 121.06589; 151.07645; 207.10267	9.80; 60.09; 9.19; 35.01; 100.00	55.01894; 105.03459; 107.05024; 119.05024; 121.06589; 135.04515; 151.07645; 163.07645; 207.10267	48.81; 15.44; 54.18; 100.00; 18.78; 14.65; 12.52; 12.83; 35.94	93.03459; 105.03459; 107.05024; 117.03459; 119.05024; 121.06589; 135.04515	8.08; 14.52; 10.00; 5.22; 100.00; 26.68; 4.89
713	113.0608	114.0680796	C6H10O2	CCCC(=O)C(=O)C	41.00329; 71.05024; 113.06080	14.58; 9.02; 100.00	41.00329; 43.01894; 69.03459; 71.05024; 113.06080	54.23; 92.52; 100.00; 47.20; 42.06	41.00329; 43.01894; 69.03459	60.77; 100.00; 42.46
714	216.03023	217.0375077	C11H7NO4	C1=CC=C2C(=C1)C=C(C(=N2)C(=O)O)C(=O)O	128.05057; 172.04040	86.38; 100.00	128.05057; 172.04040	100.00; 57.96	128.05057; 172.04040	100.00; 7.63
715	120.08187	121.0891494	C8H11N	CC1=C(C(=CC=C1)N)C	103.05532; 120.08187	4.76; 100.00	64.01927; 67.05532; 90.03492; 92.05057; 94.06622; 118.06622; 120.08187	4.95; 4.47; 9.15; 7.46; 3.89; 4.05; 100.00	40.01927; 50.00362; 51.02402; 63.02402; 64.01927; 65.03967; 66.03492; 90.03492; 118.06622; 120.08187	100.00; 27.94; 20.09; 20.66; 61.82; 21.40; 83.30; 17.70; 31.49; 37.13
716	229.05063	230.0579088	C13H10O4	C1=CC(=CC=C1C(=O)C2=C(C=C(C=C2)O)O)O	93.03459; 229.05063	16.27; 100.00	93.03459; 119.01385; 159.04515; 183.04515; 185.02442; 187.04007; 201.05572; 229.05063	37.51; 9.78; 17.93; 8.50; 10.44; 14.38; 9.53; 100.00	41.00329; 63.02402; 65.00329; 65.03967; 67.01894; 89.00329; 91.01894; 93.03459; 109.02950; 117.03459; 133.02950; 157.02950; 159.04515; 161.02442; 183.04515; 185.02442; 199.04007; 201.05572	28.30; 11.02; 21.04; 15.27; 9.69; 9.25; 10.71; 100.00; 10.10; 12.15; 33.06; 9.27; 20.61; 18.46; 35.62; 29.25; 16.11; 9.69
717	111.11792	112.1252005	C8H16	CC(=C)CC(C)(C)C	95.08662; 111.11792	0.61; 100.00	95.08662; 111.11792	9.72; 100.00	95.08662; 111.11792	96.74; 100.00
718	111.11792	112.1252005	C8H16	CC(=CC(C)(C)C)C	95.08662; 111.11792	0.36; 100.00	95.08662; 111.11792	5.00; 100.00	95.08662; 111.11792	100.00; 47.22
719	642.70325	643.71052	C20H8Br4O5	C1=CC=C2C(=C1)C(=O)OC23C4=CC(=C(C(=C4OC5=C(C(=C(C=C35)Br)O)Br)Br)O)Br	598.71342; 642.70325	15.70; 100.00	598.71342; 642.70325	56.64; 100.00	598.71342; 642.70325	100.00; 76.47
720	365.04835	366.055628	C16H21Cl3O3	CCCCC(CC)COC(=O)COC1=CC(=C(C=C1Cl)Cl)Cl	41.00329; 169.12340; 194.91767; 234.91259; 242.97519; 365.04835	23.50; 29.42; 37.40; 26.70; 24.51; 100.00	34.96940; 72.99312; 194.91767; 200.96462; 208.93332; 252.92315; 365.04835	18.02; 5.19; 100.00; 6.52; 11.69; 12.02; 9.81	34.96940; 194.91767	10.57; 100.00
721	353.01197	354.019242	C14H17Cl3O4	CCCCOCCOC(=O)COC1=CC(=C(C=C1Cl)Cl)Cl	59.01385; 73.06589; 194.91767; 234.91259; 252.92315; 278.93880; 287.00140; 353.01197	6.98; 8.89; 100.00; 18.83; 29.78; 15.68; 14.95; 45.22	34.96940; 59.01385; 72.99312; 194.91767; 196.93332; 200.96462; 208.93332; 234.91259; 252.92315	64.39; 9.54; 19.37; 100.00; 8.29; 8.85; 49.62; 15.20; 48.96	34.96940; 194.91767	35.45; 100.00
722	258.87957	259.886848	C6H3Cl3O3S	C1=C(C(=CC(=C1Cl)Cl)Cl)S(=O)(=O)O	178.92276; 258.87957	0.33; 100.00	34.96940; 258.87957	10.49; 100.00	34.96940; 178.92276	100.00; 29.58
723	194.91767	195.924948	C6H3Cl3O	C1=C(C(=CC(=C1Cl)Cl)Cl)O	86.96432; 194.91767	0.11; 100.00	34.96940; 194.91767	2.63; 100.00	34.96940; 194.91767	14.45; 100.00
724	252.92315	253.930427	C8H5Cl3O3	C1=C(C(=CC(=C1Cl)Cl)Cl)OCC(=O)O	208.93332; 252.92315	16.34; 100.00	34.96940; 208.93332	99.79; 100.00	34.96940; 178.92276	100.00; 10.28
725	251.12888	252.1361591	C14H20O4	CCOC1=CC(=C(C=C1C(=O)C)OCC)OCC	223.09758; 251.12888	9.88; 100.00	163.07645; 177.05572; 179.07137; 193.05063; 195.06628; 205.08702; 223.09758; 251.12888	13.37; 28.03; 24.55; 37.94; 14.63; 21.81; 25.15; 100.00	41.00329; 65.00329; 67.01894; 69.03459; 71.05024; 97.02950; 115.07645; 121.02950; 123.04515; 125.06080; 137.06080; 139.07645; 161.06080; 163.07645; 177.05572; 179.07137; 181.08702; 191.10775; 193.05063; 195.06628; 207.06628; 223.09758	55.42; 19.03; 61.31; 31.20; 54.41; 13.15; 13.86; 13.07; 15.87; 38.64; 12.83; 20.44; 15.35; 17.54; 76.45; 67.43; 14.43; 12.45; 100.00; 45.50; 30.52; 18.59
726	195.06628	196.0735589	C10H12O4	CCCC(=O)C1=CC(=C(C=C1O)O)O	125.02442; 195.06628	4.13; 100.00	41.00329; 69.03459; 97.02950; 109.02950; 123.00877; 125.02442; 127.04007; 137.02442; 151.00368; 153.01933; 165.01933; 177.05572; 193.05063; 195.06628	9.24; 4.49; 3.67; 6.77; 7.20; 100.00; 26.43; 4.04; 30.79; 11.71; 4.63; 13.95; 3.99; 62.99	41.00329; 43.01894; 53.00329; 65.00329; 67.01894; 68.99820; 69.03459; 71.01385; 91.01894; 93.03459; 95.01385; 95.05024; 97.02950; 109.02950; 111.04515; 123.00877; 125.02442; 127.04007; 137.02442; 149.02442; 167.03498; 177.05572	100.00; 9.07; 8.10; 9.01; 15.41; 14.88; 13.23; 9.13; 40.31; 8.84; 12.48; 19.82; 19.46; 22.51; 11.19; 8.13; 50.16; 10.26; 9.28; 9.60; 8.28; 12.10
727	195.06628	196.0735589	C10H12O4	COC1=CC(=C(C=C1C=O)OC)OC	167.07137; 195.06628	6.95; 100.00	137.06080; 139.07645; 141.05572; 149.02442; 151.04007; 167.07137; 179.03498; 195.06628	40.39; 16.11; 11.76; 17.70; 17.63; 71.87; 68.32; 100.00	53.00329; 55.01894; 57.03459; 65.00329; 67.01894; 69.03459; 83.01385; 95.01385; 97.02950; 123.04515; 137.06080; 149.02442; 151.04007; 179.03498	14.02; 55.74; 15.40; 12.45; 21.61; 51.87; 13.14; 15.86; 28.12; 15.54; 12.22; 100.00; 48.95; 16.35
728	112.07679	113.084064	C6H11NO	CC1C(=NC(O1)C)C	43.01894; 66.03492; 68.05057; 84.04549; 112.07679	26.09; 24.70; 71.28; 100.00; 46.97	40.01927; 43.01894; 66.03492; 68.05057; 112.07679	12.88; 100.00; 9.81; 32.24; 12.32	40.01927; 41.00329; 43.01894; 66.03492; 68.05057	27.00; 26.13; 100.00; 23.42; 69.70
729	134.09752	135.1047994	C9H13N	CC1=CC(=C(C=C1C)N)C	117.07097; 134.09752	29.96; 100.00	117.07097; 118.06622; 132.08187; 134.09752	19.35; 9.11; 7.67; 100.00	64.01927; 65.03967; 94.06622; 118.06622; 132.08187; 134.09752	11.85; 14.03; 13.36; 70.23; 100.00; 41.77
730	326.76613	327.7734	C6H3Br3O	C1=C(C=C(C(=C1Br)O)Br)Br	296.75556; 326.76612	0.21; 100.00	78.91889; 326.76612	4.08; 100.00	78.91889; 326.76612	23.10; 100.00
731	193.93366	194.940932	C6H4Cl3N	C1=C(C=C(C(=C1Cl)N)Cl)Cl	164.90711; 193.93366	0.29; 100.00	131.94133; 193.93366	3.67; 100.00	34.96940; 193.93366	12.06; 100.00
732	180.91326	181.920531	C4HCl3N2	C1=C(N=C(N=C1Cl)Cl)Cl	180.91325	100	180.91325	100	180.91325	100
734	163.07645	164.0837296	C10H12O2	CC1=CC(=C(C(=C1)C)C(=O)O)C	119.08662; 163.07645	100.00; 18.84	39.02402; 119.08662	2.34; 100.00	103.05532; 119.08662	1.95; 100.00
735	135.08154	136.088815	C9H12O	CC1=CC(=C(C(=C1)C)O)C	79.05532; 135.08154	1.04; 100.00	65.03967; 135.08154	3.87; 100.00	63.02402; 65.03967; 93.03459; 103.05532; 105.07097; 119.05024; 135.08154	100.00; 69.31; 20.00; 40.16; 24.86; 48.66; 31.12
736	248.10407	249.1113414	C12H15N3O3	C=CCOC1=NC(=NC(=N1)OCC=C)OCC=C	166.02581; 168.04146; 208.07276; 248.10406	100.00; 29.66; 41.21; 22.75	80.01419; 82.02984; 84.04549; 107.02509; 150.03090; 152.04655; 165.06695; 166.02581; 167.08260; 168.04146; 208.07276; 248.10406	16.64; 90.41; 13.18; 30.28; 21.69; 11.44; 22.63; 100.00; 18.79; 99.68; 23.74; 22.58	41.01452; 41.99854; 53.00329; 57.03459; 65.99854; 68.01419; 80.01419; 82.02984; 84.04549; 86.06114; 125.03565; 150.03090; 152.04655; 166.02581	20.71; 72.12; 48.21; 86.11; 62.89; 34.26; 95.28; 99.13; 20.12; 30.77; 41.96; 100.00; 19.08; 28.02
737	264.20814	265.2154125	C15H27N3O	CN(C)CC1=CC(=C(C(=C1)CN(C)C)O)CN(C)C	219.15029; 264.20814	12.81; 100.00	176.10809; 178.12374	100.00; 49.93	150.09244; 162.09244; 164.10809; 191.11899; 203.11899; 205.13464	28.55; 44.11; 25.19; 100.00; 14.75; 25.73
738	261.22239	262.2296656	C18H30O	CC(C)(C)C1=CC(=C(C(=C1)C(C)(C)C)O)C(C)(C)C	177.12849; 261.22239	0.03; 100.00	205.15979; 261.22239	2.01; 100.00	229.15979; 245.19109	100.00; 77.49
739	225.186	226.1932801	C14H26O2	CC(C)CC(C)(C#CC(C)(CC(C)C)O)O	223.17035; 225.18600	4.16; 100.00	151.11284; 207.17544; 225.18600	11.41; 46.24; 100.00	79.05532; 97.06589; 99.08154; 101.09719; 107.08662; 109.10227; 149.09719; 151.07645; 151.11284; 153.09210; 167.10775; 169.12340; 181.12340; 191.14414; 207.17544; 209.15470; 223.17035; 225.18600	35.99; 48.47; 23.75; 36.68; 19.54; 35.71; 21.57; 24.96; 93.34; 73.76; 23.51; 73.67; 22.32; 55.59; 63.16; 54.52; 18.41; 100.00
740	329.19109	330.1983654	C24H26O	CC(C)(C1=CC=CC=C1)C2=CC(=C(C=C2)O)C(C)(C)C3=CC=CC=C3	211.11284; 329.19109	2.33; 100.00	77.03967; 93.03459; 133.06589; 195.08154; 211.11284; 329.19109	16.03; 15.09; 14.19; 30.18; 73.13; 100.00	77.03967; 101.03967; 133.06589; 173.09719; 195.08154; 211.11284; 235.11284; 251.14414; 303.17544; 313.15979; 327.17544; 329.19109	100.00; 39.42; 51.44; 30.19; 91.20; 38.57; 89.82; 32.27; 32.52; 42.83; 33.51; 33.38
741	275.02472	276.0319997	C12H14Cl2O3	CCCCOC(=O)COC1=C(C=C(C=C1)Cl)Cl	160.95664; 174.97229; 275.02472	52.01; 79.21; 100.00	34.96940; 59.01385; 132.96173; 160.95664; 200.95156; 275.02472	83.66; 19.84; 8.61; 100.00; 8.72; 10.55	34.96940; 53.00329; 84.98505; 160.95664	29.88; 10.33; 17.16; 100.00
742	331.08732	332.0945999	C16H22Cl2O3	CC(C)CCCCCOC(=O)COC1=C(C=C(C=C1)Cl)Cl	160.95664; 169.12340; 174.97229; 218.96212; 331.08732	10.46; 12.05; 15.95; 8.90; 100.00	34.96940; 59.01385; 72.99312; 127.11284; 144.96173; 160.95664; 174.97229; 200.95156; 218.96212; 331.08732	100.00; 4.25; 7.68; 4.13; 7.45; 24.94; 8.28; 11.09; 33.26; 32.61	34.96940; 84.98505; 160.95664	60.81; 13.46; 100.00
743	359.11862	360.1259001	C18H26Cl2O3	CC(C)CCCCCOC(=O)CCCOC1=C(C=C(C=C1)Cl)Cl	160.95664; 359.11862	91.53; 100.00	34.96940; 59.01385; 71.01385; 73.02950; 85.02950; 97.10227; 105.07097; 109.10227; 127.11284; 129.12849; 144.96173; 160.95664; 171.13905; 203.00359; 228.98286; 237.04546; 246.99342; 253.04037; 323.14195; 357.10297; 359.11862	71.29; 5.05; 5.48; 4.99; 3.73; 7.16; 3.92; 7.73; 9.48; 6.83; 2.78; 100.00; 2.59; 3.60; 2.61; 3.34; 13.65; 5.26; 3.01; 3.23; 66.11	34.96940; 53.00329; 84.98505; 160.95664	39.79; 3.58; 5.82; 100.00
744	319.05094	320.0582144	C14H18Cl2O4	CCCCOCCOC(=O)COC1=C(C=C(C=C1)Cl)Cl	34.96940; 59.01385; 73.06589; 157.08702; 160.95664; 174.97229; 200.95156; 218.96212; 244.97777; 253.04037; 319.05094	16.00; 11.06; 17.44; 10.11; 46.36; 26.43; 34.90; 100.00; 39.55; 31.31; 93.22	34.96940; 72.99312; 160.95664; 200.95156; 218.96212	100.00; 7.24; 13.82; 11.38; 23.98	34.96940; 160.95664	100.00; 81.69
745	246.99342	248.0006996	C10H10Cl2O3	CCOC(=O)COC1=C(C=C(C=C1)Cl)Cl	59.01385; 160.95664; 200.95156; 218.96212; 246.99342	22.53; 88.07; 42.83; 38.76; 100.00	34.96940; 132.96173; 160.95664; 200.95156	76.83; 10.42; 100.00; 11.84	34.96940; 53.00329; 84.98505; 160.95664	87.91; 10.24; 17.01; 100.00
746	187.01829	188.0255633	C6H8N2O3S	C1=CC(=C(C=C1N)N)S(=O)(=O)O	107.06147; 187.01829	0.74; 100.00	107.06147; 187.01829	6.76; 100.00	40.01927; 64.01927; 66.03492; 80.96519; 107.06147; 118.98084; 143.97609; 145.99174; 187.01829	29.98; 31.79; 13.42; 44.87; 100.00; 35.07; 13.64; 22.89; 19.53
747	121.07712	122.0843983	C7H10N2	CC1=C(C=C(C=C1)N)N	104.05057; 121.07712	2.71; 100.00	40.01927; 104.05057; 121.07712	12.34; 7.61; 100.00	40.01927; 42.03492; 53.03967; 67.03017; 78.03492; 80.05057; 92.05057; 104.05057; 121.07712	100.00; 22.56; 19.80; 25.72; 46.89; 37.24; 19.33; 37.74; 51.01
748	192.93841	193.945683	C7H5Cl3	C1=CC(=C(C=C1Cl)Cl)CCl	132.96173; 192.93841	0.36; 100.00	130.94608; 192.93841	5.79; 100.00	34.96940; 192.93841	25.58; 100.00
749	260.86046	261.867739	C7H3Cl5	C1=CC(=C(C=C1Cl)Cl)C(Cl)(Cl)Cl	200.88378; 260.86046	0.03; 100.00	200.88378; 260.86046	4.31; 100.00	200.88378; 260.86046	2.73; 100.00
750	212.94911	213.95639	C7H3Cl2F3	C1=CC(=C(C=C1Cl)Cl)C(F)(F)F	152.97244; 212.94911	0.01; 100.00	152.97244; 212.94911	2.81; 100.00	152.97244; 212.94911	1.88; 100.00
751	188.98794	189.9952203	C8H8Cl2O	CC1=CC(=C(C(=C1Cl)C)Cl)O	114.99562; 188.98794	2.98; 100.00	114.99562; 188.98794	2.96; 100.00	65.00329; 114.99562; 188.98794	100.00; 69.44; 92.97
752	159.97263	160.9799046	C6H5Cl2N	C1=CC(=C(C=C1Cl)Cl)N	99.99595; 159.97263	4.67; 100.00	34.96940; 159.97263	15.18; 100.00	34.96940; 58.96940; 72.98505; 159.97263	67.21; 74.23; 14.06; 100.00
753	172.95664	173.9639201	C7H4Cl2O	C1=CC(=C(C=C1Cl)Cl)C=O	34.96940; 144.96173	79.87; 100.00	34.96940; 144.96173	100.00; 3.17	34.96940; 82.96940	100.00; 0.14
754	188.95156	189.9588348	C7H4Cl2O2	C1=CC(=C(C=C1Cl)Cl)C(=O)O	144.96173; 188.95156	100.00; 84.01	126.95923; 144.96173	10.05; 100.00	34.96940; 82.96940; 84.98505; 128.97488; 188.95156	100.00; 97.01; 77.88; 73.22; 88.47
755	174.97229	175.9795702	C7H6Cl2O	C1=CC(=C(C=C1Cl)Cl)CO	34.96940; 144.96173	100.00; 44.11	34.96940; 144.96173	100.00; 1.46	34.96940; 65.00329	100.00; 0.12
756	160.95664	161.9639201	C6H4Cl2O	C1=CC(=C(C=C1Cl)Cl)O	100.97997; 160.95664	1.83; 100.00	132.96173; 160.95664	13.99; 100.00	34.96940; 41.00329; 58.96940; 84.98505; 130.94608; 160.95664	100.00; 16.47; 43.70; 16.64; 23.59; 55.24
757	218.96212	219.9693994	C8H6Cl2O3	C1=CC(=C(C=C1Cl)Cl)OCC(=O)O	174.97229; 218.96212	46.94; 100.00	34.96940; 218.96212	100.00; 14.49	34.96940; 144.96173	100.00; 1.01
758	246.99342	248.0006996	C10H10Cl2O3	C1=CC(=C(C=C1Cl)Cl)OCCCC(=O)O	160.95664; 246.99342	100.00; 1.41	34.96940; 160.95664	14.36; 100.00	34.96940; 53.00329; 84.98505; 160.95664	49.95; 9.21; 12.55; 100.00
759	300.94984	301.9571207	C12H8Cl2O3S	C1=CC=C(C=C1)S(=O)(=O)OC2=C(C=C(C=C2)Cl)Cl	250.93419; 300.94984	2.12; 100.00	250.93419; 300.94984	3.61; 100.00	34.96940; 84.98505; 160.95664; 180.99649; 204.99649; 224.91854; 248.91854; 272.91854; 274.93419; 300.94984	27.75; 15.71; 100.00; 55.08; 10.49; 20.66; 18.35; 24.60; 14.85; 19.70
760	202.96721	203.9744848	C8H6Cl2O2	C1=CC(=C(C=C1Cl)Cl)CC(=O)O	158.97738; 202.96721	100.00; 13.37	96.98505; 158.97738	2.26; 100.00	158.97738; 184.95664	100.00; 6.97
761	146.95223	147.9595035	C4H2Cl2N2	C1=CN=C(N=C1Cl)Cl	85.98030; 146.95223	1.30; 100.00	85.98030; 146.95223	2.77; 100.00	34.96940; 146.95223	46.04; 100.00
762	158.97738	159.9846556	C7H6Cl2	CC1=C(C=C(C=C1)Cl)Cl	99.00070; 158.97738	1.57; 100.00	96.98505; 158.97738	4.40; 100.00	34.96940; 158.97738	15.08; 100.00
763	128.03173	129.0390055	C6H5F2N	C1=CC(=C(C=C1F)F)N	84.02550; 128.03173	2.20; 100.00	82.00985; 128.03173	9.47; 100.00	18.99895; 42.99895; 45.01460; 128.03173	16.22; 100.00; 25.67; 31.86
764	153.01933	154.0266087	C7H6O4	C1=CC(=C(C=C1O)O)C(=O)O	109.02950; 153.01933	100.00; 80.28	41.00329; 67.01894; 107.01385; 109.02950; 153.01933	8.71; 13.33; 9.48; 100.00; 15.06	41.00329; 65.00329; 81.03459	83.38; 43.39; 100.00
765	213.05572	214.0629942	C13H10O3	C1=CC=C(C=C1)C(=O)C2=C(C=C(C=C2)O)O	135.00877; 213.05572	5.37; 100.00	77.03967; 143.05024; 169.02950; 171.04515; 185.06080; 213.05572	13.11; 11.88; 9.39; 14.81; 8.20; 100.00	41.00329; 65.00329; 77.03967; 107.01385; 129.03459; 143.05024; 167.05024; 169.02950	42.36; 28.98; 100.00; 17.17; 13.68; 33.59; 39.34; 47.41
766	152.0717	153.0789786	C8H11NO2	COC1=CC(=C(C=C1)N)OC	136.04040; 152.07170	9.10; 100.00	106.02984; 108.04549; 136.04040; 152.07170	13.81; 10.14; 63.68; 100.00	40.01927; 41.00329; 53.00329; 55.01894; 56.01419; 57.03459; 66.03492; 67.01894; 68.01419; 78.03492; 82.02984; 92.05057; 96.04549; 106.02984; 108.04549; 136.04040	11.82; 10.69; 23.36; 54.17; 17.95; 8.46; 18.35; 12.37; 9.63; 10.69; 26.90; 8.75; 11.58; 100.00; 67.28; 19.36
767	137.09719	138.1044651	C9H14O	CC1C=C(CCC1C=O)C	109.10227; 137.09719	24.72; 100.00	41.00329; 105.07097; 109.10227; 119.08662; 135.08154; 137.09719	8.49; 18.79; 24.12; 10.65; 9.42; 100.00	65.03967; 67.01894; 67.05532; 93.07097; 105.07097; 109.10227; 117.07097; 119.08662; 121.06589; 135.08154	16.93; 17.86; 15.50; 24.33; 30.39; 12.87; 17.53; 43.08; 28.83; 100.00
768	120.08187	121.0891494	C8H11N	CC1=CC(=C(C=C1)N)C	67.05532; 120.08187	0.77; 100.00	104.05057; 120.08187	6.38; 100.00	50.00362; 51.02402; 52.01927; 63.02402; 65.03967; 67.05532; 104.05057; 118.06622; 120.08187	14.09; 17.67; 11.43; 14.57; 18.94; 100.00; 12.61; 18.50; 29.79
769	121.06589	122.0731649	C8H10O	CC1=CC(=C(C=C1)O)C	65.03967; 121.06589	0.77; 100.00	53.00329; 55.01894; 65.03967; 67.05532; 121.06589	5.74; 6.33; 6.95; 4.79; 100.00	49.00837; 51.02402; 53.00329; 55.01894; 63.02402; 65.03967; 67.05532; 121.06589	42.07; 16.64; 15.05; 13.73; 24.77; 100.00; 81.11; 33.36
770	275.02472	276.0319997	C12H14Cl2O3	CC(C)COC(=O)COC1=C(C=C(C=C1)Cl)Cl	113.06080; 160.95664; 275.02472	37.70; 76.02; 100.00	34.96940; 160.95664	31.79; 100.00	34.96940; 43.01894; 53.00329; 84.98505; 95.05024; 160.95664	88.28; 21.15; 9.33; 15.50; 11.51; 100.00
771	205.15979	206.1670653	C14H22O	CC(C)(C)C1=CC(=C(C=C1)O)C(C)(C)C	151.14922; 205.15979	0.77; 100.00	153.16487; 205.15979	1.66; 100.00	107.08662; 123.08154; 133.06589; 149.09719; 177.16487; 189.12849; 205.15979	6.33; 6.69; 17.00; 32.75; 6.26; 26.28; 100.00
772	233.19109	234.1983654	C16H26O	CCC(C)(C)C1=CC(=C(C=C1)O)C(C)(C)CC	205.15979; 233.19109	0.16; 100.00	231.17544; 233.19109	3.80; 100.00	93.03459; 97.10227; 145.06589; 147.08154; 149.09719; 159.08154; 167.14414; 187.11284; 189.12849; 191.14414; 201.12849; 203.14414; 215.14414; 215.18052; 217.15979; 231.17544; 233.19109	13.20; 8.12; 16.91; 28.86; 21.11; 8.05; 10.68; 23.57; 30.36; 10.89; 43.08; 21.27; 14.93; 12.47; 75.38; 15.04; 100.00
773	133.98521	134.9924895	C2H5N3S2	C(=S)(N)NC(=S)N	57.97569; 133.98521	57.38; 100.00	41.01452; 57.97569; 99.99749; 116.95866	28.22; 100.00; 24.76; 20.03	41.01452; 57.97569	7.58; 100.00
774	232.97777	233.9850495	C9H8Cl2O3	COC(=O)COC1=C(C=C(C=C1)Cl)Cl	160.95664; 232.97777	100.00; 43.01	34.96940; 160.95664	100.00; 31.20	34.96940; 84.98505; 160.95664	25.26; 18.11; 100.00
775	103.07645	104.0837296	C5H12O2	CC(CC(C)O)O	85.06589; 103.07645	13.74; 100.00	43.01894; 85.06589; 87.04515; 103.07645	31.81; 43.12; 23.31; 100.00	43.01894; 57.03459; 59.05024; 67.05532; 69.03459	50.75; 47.58; 33.50; 100.00; 73.98
776	99.04515	100.0524295	C5H8O2	CC(=O)CC(=O)C	57.03459; 99.04515	100.00; 44.94	57.03459; 99.04515	100.00; 44.85	41.00329; 57.03459	43.73; 100.00
777	221.13945	222.1467238	C10H22O5	COCCOCCOCCOCCOC	43.01894; 59.01385; 61.02950; 73.02950; 75.04515; 87.04515; 103.04007; 105.05572; 163.09758; 221.13945	83.66; 100.00; 36.95; 80.60; 53.29; 76.57; 98.01; 61.86; 93.77; 42.02	43.01894; 59.01385; 61.02950; 73.02950; 75.04515; 87.04515; 105.05572; 119.07137; 131.07137; 145.08702; 163.09758; 221.13945	58.13; 23.88; 100.00; 20.48; 53.68; 16.88; 61.13; 20.34; 18.25; 21.16; 53.45; 22.89	43.01894; 45.03459; 57.03459; 59.01385; 61.02950; 73.02950; 75.04515; 103.04007; 105.05572; 117.05572; 147.06628	34.90; 13.64; 11.03; 100.00; 69.67; 33.17; 65.06; 23.00; 27.64; 13.75; 15.96
778	207.1238	208.1310737	C9H20O5	COCCOCCOCCOCCO	43.01894; 59.01385; 61.02950; 71.05024; 75.04515; 87.04515; 103.04007; 105.05572; 145.08702; 149.08193	38.75; 100.00; 72.76; 54.79; 54.48; 91.06; 45.57; 41.47; 41.79; 24.97	43.01894; 59.01385; 61.02950; 73.02950; 75.04515; 87.04515; 103.04007; 105.05572; 149.08193; 207.12380	40.29; 36.76; 100.00; 20.05; 20.66; 22.63; 26.84; 22.45; 25.26; 20.57	43.01894; 59.01385; 61.02950; 103.04007; 105.05572	42.78; 95.05; 100.00; 23.16; 16.66
779	249.186	250.1932801	C16H26O2	CCC(C)(C)C1=CC(=C(C=C1O)C(C)(C)CC)O	221.19109; 249.18600	10.39; 100.00	179.10775; 221.19109; 247.17035; 249.18600	3.85; 6.80; 4.43; 100.00	41.00329; 107.01385; 109.02950; 109.06589; 111.08154; 113.09719; 119.05024; 123.08154; 149.06080; 161.06080; 163.07645; 165.09210; 177.09210; 179.10775; 205.12340; 205.15979; 207.17544; 221.19109; 233.15470; 247.17035; 249.18600	56.57; 43.84; 45.74; 61.03; 43.68; 61.81; 18.11; 55.72; 49.58; 39.83; 98.95; 85.85; 17.01; 29.58; 22.07; 72.27; 88.49; 21.74; 100.00; 22.77; 59.12
780	159.97263	160.9799046	C6H5Cl2N	C1=CC(=C(C=C1Cl)N)Cl	118.94608; 159.97263	1.60; 100.00	34.96940; 159.97263	1.85; 100.00	34.96940; 40.01927; 159.97263	30.42; 18.37; 100.00
781	188.95156	189.9588348	C7H4Cl2O2	C1=CC(=C(C=C1Cl)C(=O)O)Cl	144.96173; 188.95156	4.82; 100.00	144.96173; 188.95156	100.00; 19.77	34.96940; 128.97488; 144.96173; 188.95156	66.40; 45.12; 52.89; 100.00
782	160.95664	161.9639201	C6H4Cl2O	C1=CC(=C(C=C1Cl)O)Cl	118.94608; 160.95664	1.52; 100.00	34.96940; 160.95664	3.84; 100.00	34.96940; 41.00329; 84.98505; 160.95664	100.00; 30.92; 19.65; 36.27
783	117.00157	118.0088506	C4H6O2S	C1C=CCS1(=O)=O	64.97027; 117.00157	2.31; 100.00	64.97027; 117.00157	24.70; 100.00	64.97027; 117.00157	14.82; 100.00
784	148.93074	149.9380116	C2H2N2S3	C1(=S)NNC(=S)S1	72.98659; 76.95252	100.00; 89.00	76.95252; 148.93073	100.00; 60.26	32.98044; 76.95252	100.00; 40.95
785	186.03273	187.0400063	C8H10ClNO2	COC1=CC(=C(C=C1N)OC)Cl	34.96940; 186.03273	9.29; 100.00	34.96940; 186.03273	100.00; 13.21	34.96940; 55.01894	100.00; 3.61
786	179.0206	180.027872	C6H12O2S2	CC1(CSC(CS1)(C)O)O	161.01003; 179.02060	22.78; 100.00	86.99101; 89.00666; 120.97873; 179.02060	24.74; 22.19; 100.00; 81.04	46.99609; 118.99947; 120.97873; 137.01003; 161.01003; 162.98930; 179.02060	46.19; 13.74; 26.24; 48.60; 30.70; 20.91; 100.00
787	289.23843	290.2457096	C16H34O4	CC(C)(C)OOC(C)(C)CCC(C)(C)OOC(C)(C)C	215.16527; 289.23843	2.93; 100.00	159.13905; 289.23843	11.89; 100.00	57.03459; 57.07097; 111.11792; 113.13357; 129.09210; 131.10775; 185.15470; 199.17035; 201.18600; 273.20713; 289.23843	21.40; 20.64; 100.00; 39.35; 36.29; 19.75; 14.19; 18.35; 82.10; 39.45; 67.52
788	141.0921	142.0993797	C8H14O2	CC(C)(C#CC(C)(C)O)O	123.08154; 141.09210	15.72; 100.00	57.03459; 141.09210	54.66; 100.00	57.03459; 107.05024; 123.08154; 141.09210	49.49; 100.00; 64.56; 47.65
789	120.08187	121.0891494	C8H11N	CC1=CC(=C(C=C1)C)N	103.05532; 120.08187	14.49; 100.00	75.02402; 103.05532; 120.08187	11.28; 9.85; 100.00	40.01927; 49.00837; 66.03492; 73.00837; 75.02402; 118.06622	33.17; 30.67; 75.73; 39.79; 25.87; 100.00
790	185.02779	186.0350654	C8H10O3S	CC1=CC(=C(C=C1)C)S(=O)(=O)O	103.05532; 185.02779	2.81; 100.00	80.96519; 185.02779	60.39; 100.00	80.96519; 105.07097	100.00; 17.53
791	95.05024	96.05751487	C6H8O	CC1=CC=C(O1)C	41.00329; 77.03967; 95.05024	24.39; 100.00; 30.55	41.00329; 51.02402; 75.02402; 77.03967	40.91; 69.11; 65.12; 100.00	41.00329; 49.00837; 51.02402; 77.03967	58.41; 97.48; 100.00; 54.40
792	145.1234	146.1306798	C8H18O2	CC(C)(CCC(C)(C)O)O	127.11284; 145.12340	4.55; 100.00	57.03459; 145.12340	36.55; 100.00	57.03459; 59.05024; 111.08154; 127.11284; 129.09210; 145.12340	42.29; 53.68; 50.23; 49.62; 24.76; 100.00
793	121.06589	122.0731649	C8H10O	CC1=CC(=C(C=C1)C)O	103.05532; 121.06589	0.83; 100.00	75.02402; 79.05532; 103.05532; 119.05024; 121.06589	11.82; 7.83; 5.40; 4.88; 100.00	41.00329; 49.00837; 65.00329; 65.03967; 67.05532; 77.03967; 119.05024; 121.06589	14.00; 100.00; 13.32; 10.87; 11.63; 7.61; 12.75; 33.68
794	221.1547	222.1619799	C14H22O2	CC(C)(C)C1=CC(=C(C=C1O)C(C)(C)C)O	193.15979; 221.15470	36.50; 100.00	81.07097; 83.08662; 191.14414; 193.15979; 221.15470	7.87; 13.17; 11.60; 15.49; 100.00	81.07097; 83.08662; 109.06589; 111.08154; 135.08154; 137.06080; 147.04515; 149.06080; 191.14414; 193.15979; 205.12340; 221.15470	31.39; 82.95; 100.00; 85.93; 36.35; 29.40; 24.97; 62.29; 37.45; 74.18; 74.13; 51.62
795	148.99611	150.0033886	C2H6N4S2	C(=S)(N)NNC(=S)N	57.97569; 148.99611	36.59; 100.00	57.97569; 59.99134	100.00; 18.94	32.98044; 57.97569	9.81; 100.00
796	96.99312	98.00039392	C4H2O3	C1=CC(=O)OC1=O	53.00329; 96.99312	71.96; 100.00	53.00329; 96.99312	88.70; 100.00	53.00329; 68.99820	100.00; 31.85
797	113.0608	114.0680796	C6H10O2	CC(=O)CCC(=O)C	71.05024; 113.06080	33.79; 100.00	41.00329; 43.01894; 77.03967; 95.05024; 113.06080	88.94; 62.14; 46.04; 100.00; 56.55	41.00329; 43.01894; 51.02402; 55.01894; 69.03459; 71.05024; 79.01894; 95.05024	88.56; 100.00; 33.61; 21.71; 22.26; 20.90; 43.77; 92.35
798	193.15979	194.1670653	C13H22O	CC1CCC2(O1)C(=CCCC2(C)C)C	175.14922; 193.15979	2.61; 100.00	149.13357; 193.15979	10.02; 100.00	83.05024; 121.10227; 123.08154; 123.11792; 131.08662; 133.10227; 139.11284; 147.11792; 149.13357; 159.11792; 161.09719; 167.14414; 177.12849; 191.14414; 193.15979	5.68; 11.81; 7.23; 12.28; 19.95; 10.46; 11.93; 12.89; 13.56; 7.22; 8.13; 13.61; 21.47; 100.00; 66.11
799	200.21322	201.2204979	C11H27N3	CN(C)CCCN(C)CCCN(C)C	44.05057; 200.21322	1.30; 100.00	115.12407; 200.21322	5.55; 100.00	30.03492; 44.05057; 97.07712; 99.09277; 101.10842; 113.10842; 115.12407; 127.12407; 200.21322	33.54; 25.18; 67.38; 100.00; 19.39; 47.24; 44.38; 20.02; 17.28
800	151.07645	152.0837296	C9H12O2	CC1=CC(=O)CC(C1=O)(C)C	81.03459; 151.07645	1.54; 100.00	41.00329; 69.03459; 81.03459; 123.08154; 151.07645	9.14; 13.62; 10.59; 11.24; 100.00	41.00329; 53.00329; 67.01894; 69.03459; 81.03459; 83.05024; 135.04515	67.64; 100.00; 50.22; 34.21; 33.15; 46.71; 59.23
801	185.19109	186.1983654	C12H26O	CC(C)CC(C)CC(CC(C)C)O	183.17544; 185.19109	2.39; 100.00	55.05532; 57.07097; 85.06589; 97.10227; 99.11792; 127.11284; 185.19109	26.44; 13.02; 22.78; 31.85; 18.30; 23.18; 100.00	41.00329; 43.01894; 55.05532; 57.07097; 67.05532; 69.03459; 81.07097; 83.08662; 85.06589; 99.11792; 109.10227; 127.11284; 167.18052; 169.15979; 183.17544; 185.19109	25.92; 39.86; 19.27; 24.91; 86.20; 67.49; 17.75; 13.13; 100.00; 24.55; 25.56; 36.76; 12.26; 14.81; 16.50; 21.74
802	183.17544	184.1827154	C12H24O	CC(C)CC(C)CC(=O)CC(C)C	97.10227; 183.17544	10.85; 100.00	55.05532; 57.07097; 83.05024; 85.10227; 97.10227; 99.11792; 125.09719; 127.11284; 139.11284; 141.12849; 183.17544	7.91; 11.55; 12.15; 9.07; 17.84; 12.50; 21.40; 11.23; 6.28; 7.51; 100.00	41.00329; 67.01894; 69.03459; 79.05532; 81.07097; 83.05024; 85.10227; 95.08662; 97.10227; 99.08154; 99.11792; 109.06589; 125.09719; 167.14414	100.00; 62.56; 35.08; 22.87; 83.39; 70.56; 15.97; 38.71; 75.17; 16.41; 17.57; 15.53; 27.97; 24.51
803	219.13905	220.1463299	C14H20O2	CC(C)(C)C1=CC(=O)C=C(C1=O)C(C)(C)C	203.10775; 219.13905	0.05; 100.00	163.07645; 219.13905	5.80; 100.00	109.06589; 147.04515; 187.07645; 203.10775	35.81; 66.43; 100.00; 91.52
804	205.15979	206.1670653	C14H22O	CCC(C)C1=C(C(=CC=C1)C(C)CC)O	187.14922; 205.15979	0.11; 100.00	177.16487; 205.15979	3.35; 100.00	81.07097; 91.05532; 93.03459; 93.07097; 95.05024; 95.08662; 103.05532; 105.07097; 107.05024; 107.08662; 109.10227; 117.03459; 119.05024; 121.06589; 121.10227; 123.08154; 129.07097; 133.06589; 135.08154; 145.06589; 147.08154; 149.09719; 159.08154; 161.09719; 163.11284; 173.09719; 175.11284; 187.11284; 189.12849; 203.14414; 205.15979	18.05; 37.66; 25.63; 24.63; 17.73; 23.38; 18.25; 15.67; 21.54; 16.55; 19.03; 30.79; 51.04; 46.50; 19.66; 43.13; 19.79; 49.66; 17.23; 20.72; 40.34; 31.04; 40.06; 100.00; 36.48; 67.92; 32.74; 21.58; 88.73; 25.78; 42.41
805	108.05672	109.0639972	C5H7N3	C1=CC(=NC(=C1)N)N	41.01452; 108.05672	6.10; 100.00	41.01452; 64.01927; 108.05672	27.95; 20.61; 100.00	41.01452; 66.00977	100.00; 48.29
806	174.98353	175.9908036	C6H6Cl2N2	C1=C(C=C(C(=C1Cl)N)Cl)N	34.96940; 174.98353	19.92; 100.00	34.96940; 174.98353	100.00; 1.83	34.96940; 139.00685	100.00; 0.12
807	173.98828	174.9955546	C7H7Cl2N	CC1=C(C(=C(C=C1)Cl)N)Cl	146.97738; 173.98828	0.76; 100.00	34.96940; 173.98828	7.17; 100.00	34.96940; 173.98828	17.75; 100.00
808	172.95664	173.9639201	C7H4Cl2O	C1=CC(=C(C(=C1)Cl)C=O)Cl	34.96940; 172.95664	27.90; 100.00	34.96940; 144.96173	100.00; 1.44	34.96940; 144.96173	100.00; 0.67
809	187.96754	188.9748192	C7H5Cl2NO	C1=CC(=C(C(=C1)Cl)C(=O)N)Cl	41.99854; 187.96754	6.39; 100.00	144.96173; 187.96754	71.13; 100.00	41.99854; 144.96173	100.00; 12.65
810	242.88466	243.891934	C6H3Cl3O2S	C1=CC(=C(C(=C1)Cl)S(=O)(=O)Cl)Cl	158.90798; 242.88466	0.41; 100.00	182.90798; 242.88466	1.60; 100.00	182.90798; 242.88466	100.00; 42.44
811	188.95156	189.9588348	C7H4Cl2O2	C1=CC(=C(C(=C1)Cl)C(=O)O)Cl	144.96173; 188.95156	4.48; 100.00	144.96173; 188.95156	100.00; 34.38	34.96940; 144.96173	11.19; 100.00
812	206.91767	207.924948	C7H3Cl3O	C1=CC(=C(C(=C1)Cl)C(=O)Cl)Cl	34.96940; 206.91767	1.71; 100.00	34.96940; 206.91767	100.00; 19.06	34.96940; 82.96940	100.00; 3.42
813	160.95664	161.9639201	C6H4Cl2O	C1=CC(=C(C(=C1)Cl)O)Cl	132.96173; 160.95664	0.11; 100.00	130.94608; 160.95664	7.93; 100.00	34.96940; 82.96940; 160.95664	100.00; 34.19; 21.82
814	158.97738	159.9846556	C7H6Cl2	CC1=C(C=CC=C1Cl)Cl	72.98505; 158.97738	0.63; 100.00	130.94608; 158.97738	5.10; 100.00	34.96940; 82.96940; 158.97738	66.38; 40.49; 100.00
815	148.11317	149.1204495	C10H15N	CCC1=C(C(=CC=C1)CC)N	146.09752; 148.11317	1.33; 100.00	117.07097; 121.10227; 131.08662; 132.08187; 146.09752; 148.11317	4.94; 5.53; 9.75; 15.05; 7.55; 100.00	63.02402; 64.01927; 65.03967; 66.03492; 92.05057; 94.06622; 103.05532; 104.05057; 106.06622; 115.05532; 116.05057; 118.06622; 120.08187; 130.06622; 132.08187; 146.09752; 148.11317	30.74; 24.02; 21.22; 28.66; 65.64; 23.66; 23.27; 89.28; 90.41; 31.80; 73.32; 97.42; 95.42; 100.00; 63.97; 46.47; 27.23
816	138.01608	139.0233554	C7H3F2N	C1=CC(=C(C(=C1)F)C#N)F	70.00985; 138.01608	4.99; 100.00	66.99895; 138.01608	6.05; 100.00	18.99895; 66.99895; 138.01608	60.81; 34.49; 100.00
817	176.14447	177.1517496	C12H19N	CC(C)C1=C(C(=CC=C1)C(C)C)N	174.12882; 176.14447	0.88; 100.00	159.11792; 176.14447	9.04; 100.00	65.03967; 66.03492; 79.05532; 80.05057; 82.06622; 92.05057; 94.06622; 104.05057; 106.06622; 108.08187; 116.05057; 118.06622; 132.08187; 143.08662; 144.08187; 145.10227; 158.09752; 160.11317; 174.12882; 176.14447	30.95; 59.71; 17.99; 19.07; 21.09; 45.59; 19.06; 18.62; 26.46; 36.75; 63.15; 47.58; 26.96; 48.36; 100.00; 19.62; 24.78; 72.79; 22.36; 23.48
818	211.14922	212.1565006	C16H20	CC(C)C1=CC2=C(C=C1)C=C(C=C2)C(C)C	209.13357; 211.14922	1.92; 100.00	209.13357; 211.14922	4.42; 100.00	129.07097; 141.07097; 143.08662; 151.05532; 153.07097; 155.08662; 169.10227; 179.08662; 193.10227; 195.11792; 209.13357	20.51; 22.39; 45.20; 41.04; 100.00; 39.86; 23.20; 38.80; 29.85; 51.16; 41.43
819	181.05063	182.0579088	C9H10O4	COC1=C(C(=CC=C1)OC)C(=O)O	137.06080; 181.05063	17.39; 100.00	137.06080; 181.05063	100.00; 46.80	51.02402; 55.01894; 57.03459; 65.00329; 81.03459; 107.01385; 107.05024; 137.02442; 137.06080	29.66; 70.17; 51.41; 24.86; 49.58; 25.12; 100.00; 24.00; 25.41
820	135.11792	136.1252005	C10H16	CC=C(C)C=CC=C(C)C	109.10227; 135.11792	10.89; 100.00	105.07097; 107.08662; 109.10227; 119.08662; 135.11792	6.55; 16.00; 12.94; 8.14; 100.00	63.02402; 65.03967; 67.05532; 89.03967; 91.05532; 93.07097; 119.08662	32.81; 100.00; 73.73; 27.55; 43.72; 93.68; 28.66
821	143.14414	144.1514153	C9H20O	CC(C)CCCC(C)(C)O	125.13357; 143.14414	1.92; 100.00	125.13357; 143.14414	26.41; 100.00	43.01894; 53.03967; 57.03459; 59.05024; 69.07097; 81.07097; 109.10227; 111.08154; 125.13357; 127.11284; 141.12849; 143.14414	14.14; 17.29; 73.12; 55.23; 25.23; 12.38; 100.00; 19.19; 48.18; 72.60; 18.31; 84.60
822	143.14414	144.1514153	C9H20O	CC(C)CC(CC(C)C)O	141.12849; 143.14414	8.89; 100.00	55.05532; 57.07097; 143.14414	95.03; 99.11; 100.00	41.00329; 57.07097; 67.05532; 69.03459; 85.06589	18.14; 34.89; 100.00; 63.16; 99.23
823	120.08187	121.0891494	C8H11N	CC1=C(C(=CC=C1)C)N	93.07097; 120.08187	0.82; 100.00	118.06622; 120.08187	6.30; 100.00	63.02402; 65.03967; 67.05532; 104.05057; 118.06622; 120.08187	52.12; 75.77; 100.00; 75.70; 54.98; 71.12
824	139.11284	140.1201151	C9H16O	CC(CCC=C(C)C)C=O	111.11792; 139.11284	22.60; 100.00	105.07097; 107.08662; 109.10227; 111.11792; 121.10227; 139.11284	16.66; 77.05; 100.00; 25.42; 30.69; 62.16	41.00329; 51.02402; 53.00329; 53.03967; 55.01894; 57.03459; 63.02402; 65.03967; 67.05532; 69.03459; 91.05532; 93.07097; 95.08662; 109.10227; 111.11792	68.49; 17.32; 22.69; 26.12; 32.03; 76.56; 16.31; 63.36; 31.55; 22.03; 27.00; 32.51; 100.00; 18.22; 27.77
825	155.08662	156.0939004	C12H12	CC1=CC2=C(C=C1)C=C(C=C2)C	153.07097; 155.08662	4.64; 100.00	153.07097; 155.08662	6.28; 100.00	153.07097; 155.08662	72.84; 100.00
826	157.15979	158.1670653	C10H22O	CCC(C)CCCC(C)(C)O	155.14414; 157.15979	2.26; 100.00	57.03459; 157.15979	15.40; 100.00	43.01894; 57.03459; 57.07097; 59.05024; 67.05532; 71.08662; 83.05024; 83.08662; 85.06589; 99.08154; 101.09719; 113.09719; 123.11792; 127.11284; 129.12849; 141.12849; 157.15979	9.04; 71.35; 13.26; 22.04; 16.34; 9.63; 8.52; 18.33; 14.11; 28.95; 16.57; 9.40; 12.61; 21.02; 17.42; 24.00; 100.00
827	121.06589	122.0731649	C8H10O	CC1=C(C(=CC=C1)C)O	63.02402; 121.06589	0.33; 100.00	63.02402; 65.03967; 67.05532; 89.03967; 91.05532; 121.06589	9.76; 16.92; 8.96; 8.47; 7.01; 100.00	49.00837; 51.02402; 63.02402; 65.03967; 67.05532; 105.03459; 121.06589	48.71; 36.19; 100.00; 95.51; 52.42; 55.60; 50.90
828	235.17035	236.17763	C15H24O2	CC(C)(C)C1=CC(=CC(=C1O)C(C)(C)C)CO	217.15979; 235.17035	5.49; 100.00	205.15979; 235.17035	24.66; 100.00	97.06589; 161.09719; 189.12849; 191.14414; 201.12849; 205.15979; 217.15979; 219.13905; 235.17035	13.10; 24.57; 100.00; 11.10; 62.79; 26.64; 53.17; 11.89; 34.64
829	262.21764	263.2249145	C17H29NO	CC(C)(C)C1=CC(=CC(=C1O)C(C)(C)C)CN(C)C	205.15979; 262.21764	0.52; 100.00	260.20199; 262.21764	7.22; 100.00	189.12849; 201.12849; 203.14414; 205.15979; 217.15979; 219.17544; 230.15504; 246.18634; 260.20199; 262.21764	100.00; 12.86; 20.76; 20.01; 18.72; 7.80; 40.52; 56.25; 12.22; 14.18
830	233.19109	234.1983654	C16H26O	CCC1=CC(=C(C(=C1)C(C)(C)C)O)C(C)(C)C	133.10227; 233.19109	0.59; 100.00	181.15979; 233.19109	1.87; 100.00	97.06589; 175.11284; 201.16487; 203.18052; 205.19617; 215.18052; 217.15979; 233.19109	17.35; 17.66; 11.78; 13.46; 15.88; 11.54; 55.38; 100.00
831	235.17035	236.17763	C15H24O2	CC(C)(C)C1=CC(=CC(=C1O)C(C)(C)C)OC	219.13905; 235.17035	0.19; 100.00	163.07645; 235.17035	6.59; 100.00	125.09719; 149.09719; 163.07645; 189.12849; 191.14414; 203.10775; 219.13905; 235.17035	11.17; 10.60; 28.61; 12.79; 14.89; 100.00; 55.00; 22.63
832	205.15979	206.1670653	C14H22O	CC(C)(C)C1=C(C(=CC=C1)C(C)(C)C)O	189.12849; 205.15979	0.23; 100.00	55.05532; 205.15979	4.09; 100.00	95.08662; 97.06589; 123.08154; 133.06589; 173.09719; 189.12849; 205.15979	20.29; 22.84; 20.34; 28.46; 79.01; 100.00; 30.11
833	215.03498	216.0422587	C12H8O4	C1=CC2=C(C=CC(=C2)C(=O)O)C=C1C(=O)O	127.05532; 171.04515	100.00; 91.25	127.05532; 171.04515	100.00; 33.17	127.05532; 171.04515	100.00; 19.33
834	166.01458	167.0218576	C7H5NO4	C1=CC(=NC(=C1)C(=O)O)C(=O)O	78.03492; 122.02475	100.00; 57.42	78.03492; 122.02475	100.00; 16.13	51.02402; 78.03492	7.05; 100.00
835	121.07712	122.0843983	C7H10N2	CC1=C(C=CC=C1N)N	104.05057; 121.07712	2.98; 100.00	66.03492; 68.05057; 91.03017; 93.04582; 104.05057; 121.07712	5.19; 4.02; 5.32; 4.84; 6.08; 100.00	40.01927; 50.00362; 52.01927; 64.01927; 66.03492; 68.05057; 104.05057	100.00; 27.04; 19.75; 50.74; 85.30; 18.06; 20.27
836	188.02879	189.0360684	C9H7N3S	CC1=C2C(=CC=C1)SC3=NN=CN23	161.01789; 188.02879	3.50; 100.00	161.01789; 188.02879	12.19; 100.00	161.01789; 188.02879	100.00; 90.90
837	279.1139	280.1211778	C17H16N2O2	CC(=O)NC1=CC2=C(C=C1)C3=C(C2)C=C(C=C3)NC(=O)C	237.10334; 279.11390	100.00; 47.69	193.07712; 237.10334; 279.11390	21.60; 100.00; 58.20	41.99854; 58.02984; 166.06622; 178.06622; 193.07712; 194.06114; 195.09277; 208.07679; 221.07204; 237.10334; 263.08260	42.98; 22.43; 12.06; 17.75; 47.26; 15.29; 47.16; 14.28; 100.00; 59.01; 14.21
838	169.15979	170.1670653	C11H22O	CC(C)CCC(=O)CCC(C)C	97.06589; 169.15979	5.14; 100.00	97.06589; 99.08154; 111.08154; 113.09719; 169.15979	15.91; 8.32; 9.42; 4.52; 100.00	41.00329; 57.03459; 57.07097; 67.05532; 69.03459; 71.08662; 81.03459; 83.05024; 93.07097; 95.05024; 95.08662; 97.06589; 99.08154; 111.08154; 113.09719; 125.09719; 153.12849; 169.15979	100.00; 47.27; 21.72; 34.59; 56.65; 33.69; 29.47; 70.23; 65.21; 23.80; 47.36; 94.83; 56.13; 56.13; 42.25; 33.61; 27.87; 26.30
839	260.04838	261.0556563	C14H12ClNO2	CC1=C(C=CC(=C1)NC2=CC=CC=C2C(=O)O)Cl	216.05855; 260.04838	28.74; 100.00	216.05855; 260.04838	100.00; 6.45	34.96940; 116.05057; 164.02725; 166.04290; 200.02725; 216.05855	63.73; 19.99; 16.27; 16.07; 65.23; 100.00
840	199.07645	200.0837296	C13H12O2	C1=CC=C(C(=C1)CC2=CC=C(C=C2)O)O	93.03459; 199.07645	8.22; 100.00	93.03459; 199.07645	100.00; 87.92	77.03967; 93.03459; 103.05532; 105.03459; 117.03459; 119.05024; 129.03459; 131.05024; 133.06589; 141.03459; 143.05024; 145.06589; 169.06589; 171.08154; 181.06589	22.64; 40.02; 10.95; 16.41; 15.79; 69.53; 18.33; 100.00; 50.01; 25.06; 12.34; 11.97; 24.61; 22.11; 12.90
841	326.1034	327.1106726	C18H17NO5	COC1=C(C=C(C=C1)C=CC(=O)NC2=CC=CC=C2C(=O)O)OC	189.05572; 282.11357; 326.10340	7.56; 36.95; 100.00	92.05057; 118.02984; 120.04549; 131.05024; 147.04515; 250.08735; 252.10300; 256.09792; 266.08227; 280.09792; 282.11357; 294.07718; 324.08775; 326.10340	20.43; 15.75; 7.47; 12.97; 7.02; 99.52; 8.25; 6.70; 100.00; 12.95; 16.32; 6.38; 5.65; 6.27	41.99854; 77.03967; 92.05057; 117.03459; 118.02984; 119.05024; 120.04549; 131.05024; 147.04515; 162.01967; 163.07645; 170.06114; 194.06114; 196.07679; 216.06662; 224.07170; 226.08735; 236.03532; 238.05097; 238.08735; 240.06662; 250.08735; 252.06662; 252.10300; 254.08227; 256.06153; 266.04588; 266.08227; 292.06153; 310.07210; 324.08775	15.35; 18.07; 44.17; 20.47; 34.22; 100.00; 15.87; 9.05; 82.99; 14.48; 33.47; 25.18; 24.17; 44.70; 18.80; 25.29; 37.14; 16.31; 35.94; 45.40; 44.02; 22.95; 21.09; 16.84; 14.25; 12.17; 10.51; 85.84; 13.26; 9.59; 39.92
842	189.16085	190.1681279	C9H22N2O2	CN(C)CCOCCN(C)CCO	72.04549; 88.07679; 118.08735; 145.13464; 189.16085	44.48; 100.00; 92.08; 59.48; 50.10	43.01894; 70.06622; 72.04549; 74.06114; 86.06114; 88.07679; 100.07679; 118.08735; 189.16085	37.64; 32.58; 41.56; 39.95; 25.17; 100.00; 90.63; 39.32; 61.97	41.00329; 43.01894; 44.05057; 45.03459; 54.03492; 56.05057; 58.06622; 70.02984; 72.04549; 74.06114	12.67; 100.00; 5.04; 17.65; 5.79; 4.59; 6.61; 15.47; 18.38; 20.13
843	205.14453	206.1518092	C10H22O4	CCCCOCCOCCOCCO	59.01385; 61.02950; 73.06589; 87.04515; 103.04007; 105.05572; 117.09210; 205.14453	100.00; 61.57; 50.59; 35.51; 49.86; 41.02; 37.28; 29.43	43.01894; 59.01385; 61.02950; 73.06589; 87.04515; 103.04007; 105.05572; 115.07645; 117.09210	58.25; 75.69; 100.00; 28.57; 48.82; 68.64; 50.88; 29.36; 61.35	43.01894; 59.01385; 61.02950; 103.04007	26.31; 77.20; 100.00; 18.58
844	177.11323	178.1205091	C8H18O4	CCOCCOCCOCCO	61.02950; 71.05024; 87.04515; 103.04007; 105.05572; 115.07645	82.44; 100.00; 75.08; 73.46; 43.13; 35.01	43.01894; 45.03459; 61.02950; 87.04515; 103.04007; 105.05572	77.94; 28.41; 78.27; 73.68; 100.00; 72.85	43.01894; 59.01385; 61.02950	33.09; 100.00; 60.96
845	163.09758	164.104859	C7H16O4	COCCOCCOCCO	43.01894; 59.01385; 61.02950; 75.04515; 103.04007	46.99; 100.00; 97.33; 51.62; 89.55	59.01385; 61.02950; 73.02950; 75.04515; 87.04515; 103.04007; 105.05572	100.00; 56.72; 34.75; 26.11; 39.63; 55.53; 29.34	43.01894; 59.01385; 61.02950	43.51; 100.00; 53.82
846	191.12888	192.1361591	C9H20O4	CCCOCCOCCOCCO	43.01894; 59.01385; 59.05024; 61.02950; 87.04515; 103.04007; 103.07645; 105.05572; 191.12888	56.75; 100.00; 72.90; 77.64; 51.07; 42.83; 67.49; 34.36; 70.09	43.01894; 59.01385; 59.05024; 61.02950; 87.04515; 103.04007; 103.07645; 105.05572	41.89; 81.63; 62.21; 100.00; 39.35; 51.47; 46.65; 40.20	41.00329; 43.01894; 59.01385; 61.02950	33.60; 26.13; 100.00; 66.70
847	132.103	133.1102787	C6H15NO2	CN(C)CCOCCO	59.01385; 61.02950	100.00; 47.18	59.01385; 61.02950	100.00; 38.88	43.01894; 59.01385	88.15; 100.00
848	189.14962	190.1568946	C10H22O3	CCCCCCOCCOCCO	59.01385; 61.02950; 101.09719; 103.04007; 145.12340; 189.14962	61.32; 49.84; 100.00; 21.14; 25.70; 75.35	59.01385; 61.02950; 87.04515; 99.08154; 101.09719; 103.04007; 105.05572	100.00; 82.41; 35.25; 26.19; 27.35; 50.46; 39.24	41.00329; 59.01385	43.52; 100.00
849	368.18673	369.1940083	C22H27NO4	CCCCN(CCCC)C1=CC(=C(C=C1)C(=O)C2=CC=CC=C2C(=O)O)O	324.1969	10.68	164.10809; 264.10300; 266.11865; 268.13430; 270.14995; 272.16560; 274.18125; 310.10848; 312.12413; 318.17108; 324.19690; 368.18673	5.47; 10.24; 100.00; 39.80; 5.18; 5.79; 5.03; 13.17; 13.09; 21.08; 13.53; 21.80	68.05057; 77.03967; 105.03459; 164.10809; 190.08735; 197.06080; 264.10300; 266.11865; 268.06153; 268.13430; 270.14995; 272.16560; 274.18125; 280.13430; 282.14995; 294.14995; 296.16560; 306.18634; 368.18673	4.77; 13.41; 4.65; 4.66; 5.81; 6.08; 7.19; 100.00; 5.55; 57.30; 28.03; 33.90; 14.93; 18.77; 14.00; 26.19; 12.07; 6.71; 9.35
850	312.12413	313.1314081	C18H19NO4	CCN(CC)C1=CC(=C(C=C1)C(=O)C2=CC=CC=C2C(=O)O)O	240.10300; 268.13430; 312.12413	33.74; 31.41; 100.00	77.03967; 238.08735; 240.10300; 242.11865; 250.12374; 268.13430; 312.12413	4.75; 100.00; 40.08; 11.59; 3.94; 28.58; 5.57	68.05057; 77.03967; 79.05532; 96.08187; 105.03459; 129.03459; 134.06114; 158.06114; 162.05605; 162.09244; 164.07170; 169.02950; 171.04515; 197.06080; 199.07645; 200.10809; 214.08735; 216.10300; 236.07170; 238.08735; 238.12374; 240.10300; 242.11865; 250.08735; 250.12374; 252.10300; 264.06662; 266.11865; 268.13430; 280.09792; 294.11357	13.37; 58.48; 11.35; 13.41; 17.37; 14.34; 9.84; 10.20; 8.57; 14.17; 9.43; 10.58; 11.16; 23.14; 14.33; 9.95; 19.93; 19.69; 14.47; 86.93; 14.94; 100.00; 44.55; 9.86; 26.89; 17.92; 12.66; 15.06; 9.04; 12.23; 15.99
851	145.13464	146.1419132	C7H18N2O	CN(C)CCN(C)CCO	115.12407; 127.12407; 145.13464	21.76; 13.38; 100.00	42.03492; 44.05057; 58.06622; 70.06622; 72.04549; 74.06114; 99.09277; 100.07679; 101.10842; 127.12407; 145.13464	16.57; 40.84; 15.44; 32.11; 39.03; 57.65; 21.87; 16.08; 17.88; 64.24; 100.00	42.03492; 43.01894; 44.05057; 54.03492; 56.05057; 70.02984; 70.06622; 83.06147; 85.07712; 99.09277; 101.10842	18.88; 33.73; 41.80; 100.00; 29.90; 18.49; 57.08; 14.74; 14.69; 26.48; 14.25
852	329.21222	330.2194948	C21H30O3	CC12CCC3C(C1CCC2C(=O)CO)CCC4=CC(=O)CCC34C	311.20165; 329.21222	6.42; 100.00	267.17544; 269.19109; 271.20674; 297.18600; 299.20165; 329.21222	7.43; 8.80; 12.37; 16.29; 21.01; 100.00	41.00329; 119.05024; 121.06589; 255.17544; 257.19109; 273.18600; 283.17035; 287.20165; 295.17035; 297.18600; 299.16527; 299.20165; 301.18092; 311.20165; 313.18092; 325.18092; 327.19657; 329.21222	16.69; 9.37; 14.81; 15.71; 12.48; 15.33; 14.37; 13.90; 19.38; 10.72; 9.52; 8.82; 28.87; 23.61; 15.29; 83.15; 100.00; 29.31
853	415.32177	416.3290453	C27H44O3	CC(CCC(C(C)(C)O)O)C1CCC2C1(CCCC2=CC=C3CC(CCC3=C)O)C	397.31120; 415.32177	40.24; 100.00	43.01894; 57.03459; 59.05024; 69.03459; 87.04515; 89.06080; 137.09719; 327.26934; 337.25369; 339.26934; 355.26425; 357.27990; 359.29555; 379.30064; 387.32685; 397.31120; 413.30612; 415.32177; 0.018219	4.91; 14.63; 9.09; 5.57; 16.37; 7.48; 7.28; 4.37; 8.62; 25.22; 33.77; 17.87; 4.25; 8.46; 4.77; 40.53; 8.63; 100.00; 0.0064985)	43.01894; 57.03459; 59.05024; 65.03967; 69.03459; 93.07097; 109.06589; 111.08154; 119.08662; 121.06589; 133.06589; 135.08154; 137.09719; 279.21182; 279.23295; 281.22747; 285.25877; 299.23804; 305.24860; 309.25877; 343.26425; 357.27990; 371.29555; 379.30064; 383.29555; 385.31120; 387.32685; 397.31120; 399.29047; 413.30612; 415.32177	41.87; 42.83; 20.62; 11.90; 10.33; 22.80; 10.38; 31.41; 13.65; 16.77; 19.39; 33.56; 18.33; 12.79; 23.94; 19.76; 11.24; 17.58; 24.81; 13.80; 11.37; 23.61; 19.42; 15.70; 10.32; 18.38; 14.18; 18.46; 21.29; 100.00; 43.02
854	401.3425	402.3497807	C27H46O2	CC(CCCC(C)(C)O)C1CCC2C1(CCC3C2CC=C4C3(CCC(C4)O)C)C	383.33194; 401.34250	5.90; 100.00	383.33194; 401.34250	18.93; 100.00	283.24312; 299.23804; 301.25369; 309.25877; 327.26934; 341.28499; 367.30064; 383.33194; 385.31120; 399.32685; 401.34250	6.47; 6.43; 7.65; 6.97; 15.83; 5.07; 6.91; 19.64; 11.87; 100.00; 72.81
855	139.07645	140.0837296	C8H12O2	CC(=O)C1CCCCC1=O	97.06589; 139.07645	34.00; 100.00	41.00329; 43.01894; 95.05024; 97.06589; 139.07645	100.00; 26.75; 14.31; 20.97; 40.42	41.00329; 43.01894; 57.03459; 95.05024; 123.04515	100.00; 57.02; 9.53; 9.04; 9.16
856	222.09244	223.099714	C15H13NO	CC(=O)NC1=CC2=C(C=C1)C3=CC=CC=C3C2	180.08187; 222.09244	49.99; 100.00	180.08187; 222.09244	34.72; 100.00	139.05532; 151.05532; 153.07097; 178.06622; 180.08187; 206.06114; 222.09244	14.83; 27.47; 14.00; 25.11; 100.00; 22.94; 29.60
857	175.02231	176.0295861	C10H8OS	CC(=O)C1=CC2=CC=CC=C2S1	133.01174; 175.02231	100.00; 39.93	133.01174; 175.02231	100.00; 15.87	133.01174; 175.02231	100.00; 10.09
858	207.08154	208.088815	C15H12O	CC(=O)C1=CC2=C(C=C1)C3=CC=CC=C3C2	189.07097; 207.08154	1.20; 100.00	165.07097; 207.08154	19.74; 100.00	165.07097; 189.07097; 207.08154	51.96; 57.71; 100.00
859	120.04549	121.0527638	C7H7NO	CC(=O)C1=CC=CC=N1	78.03492; 120.04549	100.00; 63.88	78.03492; 120.04549	100.00; 25.28	41.00329; 49.00837; 50.00362; 51.02402; 52.01927; 78.03492; 120.04549	33.72; 23.07; 18.12; 42.35; 16.29; 100.00; 12.40
860	108.04549	109.0527638	C6H7NO	CC(=O)C1=CC=CN1	66.03492; 108.04549	100.00; 93.32	41.00329; 66.03492	3.75; 100.00	40.01927; 41.00329; 50.00362; 64.01927; 66.03492; 90.03492	84.03; 19.11; 27.32; 12.15; 100.00; 10.30
861	126.00191	127.009185	C5H5NOS	CC(=O)C1=NC=CS1	32.98044; 83.99134	32.59; 100.00	32.98044; 83.99134	100.00; 90.21	56.98044; 83.99134	100.00; 39.13
862	206.04925	207.0565291	C7H13NO4S	CC(C)(CS(=O)(=O)O)NC(=O)C=C	152.03869; 206.04925	100.00; 89.13	41.99854; 70.02984; 80.96519; 152.03869; 206.04925	19.59; 47.29; 100.00; 38.47; 17.53	41.99854; 80.96519; 94.98084; 152.03869	78.53; 100.00; 50.77; 86.73
863	133.06589	134.0731649	C9H10O	C=CCC1=CC=CC=C1O	107.05024; 133.06589	17.17; 100.00	105.03459; 107.05024; 131.05024; 133.06589	6.16; 55.41; 21.27; 100.00	41.00329; 49.00837; 51.02402; 63.02402; 65.03967; 87.02402; 89.03967; 93.03459; 107.05024; 115.05532; 117.03459; 131.05024	40.68; 27.33; 21.37; 46.54; 43.34; 20.19; 21.59; 38.62; 100.00; 24.42; 53.27; 59.14
864	222.02304	223.0303143	C10H9NO3S	C1=CC=C2C(=C1)C=CC(=C2S(=O)(=O)O)N	142.06622; 222.02304	2.05; 100.00	101.03967; 222.02304	11.86; 100.00	126.03492; 142.06622	16.37; 100.00
865	188.0023	189.0095789	C6H7NO4S	C1=CC(=C(C=C1S(=O)(=O)O)N)O	108.04549; 188.00230	0.60; 100.00	80.96519; 188.00230	5.60; 100.00	80.96519; 104.96519; 108.04549; 142.98084; 155.97609; 157.99174; 160.00739; 188.00230	100.00; 12.06; 13.90; 3.69; 8.38; 8.89; 8.38; 4.89
866	111.09277	112.1000484	C6H12N2	CC(C)C(C)(C#N)N	94.06622; 111.09277	95.10; 100.00	94.06622; 111.09277	100.00; 96.35	50.00362; 52.01927; 67.03017; 69.04582; 94.06622; 111.09277	29.03; 82.77; 49.31; 100.00; 93.68; 26.80
867	125.10842	126.1156985	C7H14N2	CC(C)CC(C)(C#N)N	123.09277; 125.10842	1.40; 100.00	96.08187; 123.09277; 125.10842	17.56; 100.00; 91.69	52.01927; 53.01452; 67.03017; 69.04582; 92.05057; 93.04582; 107.06147; 109.07712	72.11; 20.24; 95.23; 100.00; 23.79; 20.48; 18.74; 41.96
868	118.08735	119.0946287	C5H13NO2	CCC(CO)(CO)N	88.07679; 118.08735	12.47; 100.00	88.07679; 98.06114; 100.07679; 116.07170; 118.08735	7.44; 9.17; 41.86; 100.00; 91.56	56.05057; 58.02984; 84.04549; 88.07679; 116.07170; 118.08735	100.00; 85.26; 40.23; 91.34; 19.96; 52.09
869	88.07679	89.08406397	C4H11NO	CC(C)(CO)N	86.06114; 88.07679	10.88; 100.00	56.05057; 88.07679	8.13; 100.00	55.01894; 56.05057; 58.06622; 88.07679	36.81; 100.00; 21.73; 44.11
870	83.06147	84.06874826	C4H8N2	CC(C)(C#N)N	66.03492; 83.06147	4.03; 100.00	66.03492; 83.06147	9.26; 100.00	50.00362; 66.03492	33.25; 100.00
871	197.08327	198.0905463	C11H10N4	CN1C2=C(C3=C(C=C2)N=CC=C3)N=C1N	170.07237; 197.08327	0.29; 100.00	170.07237; 197.08327	14.25; 100.00	143.06147; 170.07237; 181.05197; 197.08327	26.68; 63.38; 33.23; 100.00
872	142.00652	143.0137915	C6H6ClNO	C1=CC(=C(C=C1Cl)N)O	34.96940; 142.00652	2.73; 100.00	34.96940; 142.00652	100.00; 9.27	34.96940; 56.01419	100.00; 0.52
873	179.02846	180.0357341	C8H8N2OS	COC1=C2C(=CC=C1)SC(=N2)N	152.01756; 179.02846	1.90; 100.00	152.01756; 179.02846	18.18; 100.00	41.01452; 56.98044; 57.97569; 99.00224; 111.00224; 122.00699; 123.00224; 135.00224; 149.01789; 162.99716; 177.01281; 179.02846	68.47; 11.47; 100.00; 17.29; 17.91; 16.67; 34.50; 92.05; 16.63; 66.73; 37.94; 12.76
874	163.03354	164.0408194	C8H8N2S	CC1=C2C(=CC=C1)SC(=N2)N	136.02264; 163.03354	2.70; 100.00	136.02264; 163.03354	17.10; 100.00	57.97569; 123.00224; 129.04582; 136.02264; 137.01789; 161.01789; 163.03354	75.33; 13.78; 41.09; 100.00; 11.52; 24.30; 37.84
875	122.06114	123.0684139	C7H9NO	CC1=CC(=C(C=C1)O)N	105.03459; 122.06114	15.90; 100.00	65.03967; 67.05532; 105.03459; 122.06114	8.63; 7.65; 7.49; 100.00	40.01927; 41.00329; 49.00837; 51.02402; 64.01927; 65.03967; 67.05532; 120.04549; 122.06114	16.43; 18.87; 44.02; 21.05; 34.18; 100.00; 76.91; 17.28; 19.88
876	157.00772	158.0149986	C5H6N2O2S	C1=C(N=C(S1)N)CC(=O)O	113.01789; 157.00772	53.09; 100.00	41.01452; 113.01789; 114.98592; 157.00772	26.17; 79.70; 41.82; 100.00	41.01452; 44.98044; 68.98044; 70.99609; 84.00910; 86.00699; 112.97027; 113.01789; 129.99682	100.00; 9.60; 6.23; 61.89; 7.89; 16.69; 13.73; 17.03; 6.44
877	177.04919	178.0564695	C9H10N2S	CC1=CC2=C(C=C1C)SC(=N2)N	150.03829; 177.04919	20.61; 100.00	150.03829; 177.04919	83.81; 100.00	41.01452; 56.98044; 57.97569; 80.98044; 82.99609; 135.02739; 160.02264	100.00; 10.60; 34.67; 18.37; 16.63; 62.52; 13.06
878	248.02839	249.0356698	C13H9ClFNO	C1=CC=C(C(=C1)C(=O)C2=C(C=CC(=C2)Cl)N)F	151.99086; 248.02839	19.78; 100.00	126.01160; 129.03459; 151.99086; 248.02839	10.53; 5.09; 37.18; 100.00	34.96940; 126.01160; 129.03459; 144.04549; 147.02517; 151.99086; 162.01160; 178.00652; 180.02217; 202.00652; 222.01274; 246.01274; 248.02839	40.21; 16.36; 15.94; 14.47; 16.28; 25.05; 18.66; 100.00; 13.52; 10.97; 16.35; 25.76; 9.38
879	219.98407	220.991342	C7H8ClNO3S	CC1=CC(=C(C=C1Cl)S(=O)(=O)O)N	192.97317; 219.98407	0.51; 100.00	140.02725; 219.98407	8.08; 100.00	34.96940; 64.01927; 66.03492; 80.96519; 140.02725; 152.94187; 219.98407	100.00; 24.05; 31.83; 27.29; 96.54; 24.23; 61.72
880	186.02304	187.0303143	C7H9NO3S	CC1=CC(=C(C=C1)N)S(=O)(=O)O	80.96519; 186.02304	43.31; 100.00	80.96519; 186.02304	62.00; 100.00	49.00837; 78.03492; 80.96519; 104.05057; 106.06622	8.30; 7.07; 100.00; 33.19; 25.93
881	193.04411	194.0513841	C9H10N2OS	CCOC1=CC2=C(C=C1)N=C(S2)N	165.01281; 193.04411	10.56; 100.00	162.99716; 165.01281; 193.04411	24.30; 94.84; 100.00	41.01452; 57.97569; 111.00224; 135.00224; 137.01789; 138.00191; 149.00666; 149.01789; 162.99716; 165.01281; 191.02846	40.60; 100.00; 20.38; 55.07; 24.22; 14.07; 23.64; 11.28; 89.18; 17.46; 38.64
882	128.14447	129.1517496	C8H19N	CC(C)CCCC(C)N	126.12882; 128.14447	5.51; 100.00	111.11792; 112.11317; 126.12882; 128.14447	14.25; 12.28; 22.75; 100.00	40.01927; 42.03492; 53.03967; 56.05057; 67.05532; 71.08662; 95.08662; 96.08187; 111.11792; 112.11317; 128.14447	12.38; 100.00; 22.88; 39.35; 12.69; 17.66; 39.53; 18.79; 28.71; 59.71; 35.79
883	192.08187	193.0891494	C14H11N	C1=CC=C2C=C3C=C(C=CC3=CC2=C1)N	141.07097; 192.08187	0.09; 100.00	141.07097; 192.08187	1.81; 100.00	165.07097; 192.08187	25.48; 100.00
884	222.05605	223.0633285	C14H9NO2	C1=CC=C2C(=C1)C(=O)C3=C(C2=O)C=C(C=C3)N	206.02475; 222.05605	0.02; 100.00	195.04515; 222.05605	1.17; 100.00	195.04515; 222.05605	68.71; 100.00
885	135.05639	136.0636629	C7H8N2O	C1=CC=C(C(=C1)C(=O)N)N	92.05057; 135.05639	39.89; 100.00	41.99854; 92.05057	100.00; 87.56	41.99854; 92.05057	100.00; 23.74
886	251.9642	252.9714793	C6H7NO6S2	C1=CC(=C(C=C1S(=O)(=O)O)N)S(=O)(=O)O	130.98084; 251.96420	0.43; 100.00	80.96519; 133.99174; 251.96420	15.72; 9.66; 100.00	66.03492; 80.96519; 104.96519; 145.99174; 148.00739; 172.00739	34.79; 100.00; 18.00; 15.77; 19.63; 17.19
887	132.05672	133.0639972	C7H7N3	C1=CC=C2C(=C1)NC(=N2)N	105.04582; 132.05672	5.25; 100.00	105.04582; 132.05672	7.39; 100.00	105.04582; 130.04107	43.67; 100.00
888	149.01789	150.0251694	C7H6N2S	C1=CC=C2C(=C1)N=C(S2)N	122.00699; 149.01789	3.77; 100.00	122.00699; 149.01789	4.65; 100.00	122.00699; 149.01789	100.00; 63.65
889	183.09277	184.1000484	C12H12N2	C1=CC=C(C=C1)NC2=CC=CC=C2N	105.04582; 183.09277	1.05; 100.00	133.07712; 156.08187; 183.09277	3.49; 3.46; 100.00	40.01927; 90.03492; 92.05057; 104.05057; 116.05057; 129.04582; 131.06147; 140.05057; 152.05057; 153.04582; 154.06622; 155.06147; 157.07712; 167.06147; 181.07712; 183.09277	8.86; 5.46; 100.00; 14.98; 26.37; 8.61; 22.85; 11.57; 15.63; 8.96; 8.64; 13.94; 15.37; 17.13; 7.00; 6.49
890	140.0023	141.0095789	C2H7NO4S	C(COS(=O)(=O)O)N	96.96010; 140.00230	5.81; 100.00	96.96010; 140.00230	83.60; 100.00	80.96519; 96.96010	44.86; 100.00
891	115.12407	116.1313485	C6H16N2	CCN(CC)CCN	72.08187; 115.12407	2.70; 100.00	70.06622; 96.08187; 98.09752; 111.09277; 113.10842; 115.12407	10.93; 9.52; 13.81; 24.05; 29.44; 100.00	40.01927; 42.03492; 44.05057; 59.06147; 70.06622; 72.08187	6.39; 100.00; 20.73; 9.05; 10.93; 9.23
892	180.08187	181.0891494	C13H11N	C1C2=CC=CC=C2C3=C1C=C(C=C3)N	127.05532; 180.08187	0.05; 100.00	127.05532; 180.08187	2.60; 100.00	127.05532; 151.05532; 153.07097; 178.06622; 180.08187	13.63; 37.63; 15.01; 20.25; 100.00
893	122.06114	123.0684139	C7H9NO	CC1=C(C(=CC=C1)O)N	95.05024; 122.06114	0.57; 100.00	63.02402; 65.03967; 93.03459; 95.05024; 104.05057; 120.04549; 122.06114	5.81; 12.10; 6.18; 6.24; 7.98; 36.59; 100.00	41.00329; 49.00837; 51.02402; 63.02402; 65.00329; 65.03967; 66.03492; 67.01894; 67.05532; 104.05057; 120.04549; 122.06114	100.00; 19.25; 37.33; 52.59; 46.69; 74.00; 22.15; 28.20; 23.29; 16.56; 12.94; 13.98
894	177.10334	178.1106131	C10H14N2O	CC(C)NC(=O)C1=CC=CC=C1N	92.05057; 177.10334	48.98; 100.00	41.99854; 92.05057; 118.02984; 177.10334	35.65; 100.00; 12.07; 15.42	41.99854; 42.03492; 68.01419; 77.03967; 92.05057; 94.06622	69.12; 4.02; 7.05; 8.74; 100.00; 6.73
895	267.11727	268.1245491	C13H20N2O2S	CN(C1CCCCC1)S(=O)(=O)C2=CC=CC=C2N	174.05942; 267.11727	10.66; 100.00	91.98117; 92.05057; 174.05942; 267.11727	8.75; 49.28; 32.16; 100.00	64.97027; 66.03492; 91.98117; 92.05057; 129.00157; 156.01247; 185.03902; 267.11727	14.27; 3.80; 4.41; 100.00; 6.17; 14.24; 3.55; 3.04
896	108.04549	109.0527638	C6H7NO	C1=CC=C(C(=C1)N)O	66.03492; 108.04549	0.60; 100.00	54.03492; 108.04549	1.83; 100.00	40.01927; 41.00329; 50.00362; 52.01927; 53.03967; 64.01927; 65.00329; 67.01894; 108.04549	35.15; 100.00; 14.34; 10.42; 11.24; 28.18; 45.85; 10.60; 16.11
897	93.04582	94.0530982	C5H6N2	C1=CC=NC(=C1)N	66.03492; 93.04582	0.67; 100.00	66.03492; 93.04582	3.23; 100.00	40.01927; 41.01452; 64.01927; 66.03492; 93.04582	60.84; 100.00; 41.60; 37.64; 91.02
898	99.00224	100.0095193	C3H4N2S	C1=CSC(=N1)N	32.98044; 99.00224	19.05; 100.00	57.97569; 71.99134; 99.00224	59.26; 100.00; 76.46	57.97569; 65.01452	100.00; 7.25
899	122.06114	123.0684139	C7H9NO	COC1=CC=CC=C1N	106.02984; 122.06114	2.28; 100.00	106.02984; 122.06114	65.95; 100.00	40.01927; 49.00837; 50.00362; 51.02402; 55.01894; 64.01927; 66.03492; 92.05057; 106.02984	23.42; 10.32; 7.71; 10.81; 6.25; 19.65; 14.29; 100.00; 10.55
900	175.06253	176.0698109	C8H8N4O	C1=CC=C2C(=C1)NC(=N2)NC(=O)N	132.05672; 158.03599	100.00; 79.84	132.05672; 158.03599	19.34; 100.00	105.04582; 130.04107; 132.05672	66.98; 100.00; 49.63
901	145.0295	146.0367794	C9H6O2	C1=CC=C2C(=C1)C=C(O2)C=O	117.03459; 145.02950	100.00; 4.74	117.03459; 145.02950	100.00; 12.70	91.01894; 117.03459	8.63; 100.00
902	134.02475	135.0320284	C7H5NO2	C1=CC=C2C(=C1)NC(=O)O2	106.02984; 134.02475	8.38; 100.00	106.02984; 134.02475	94.55; 100.00	64.01927; 84.00910; 106.02984; 108.00910; 134.02475	16.78; 8.88; 96.35; 13.31; 100.00
903	365.22345	366.2307282	C23H30N2O2	CCC(CC1=CC=CC=C1)(C(=O)C2=CC=C(C=C2)N3CCOCC3)N(C)C	321.19724; 365.22345	6.34; 100.00	77.03967; 91.05532; 110.06114; 131.08662; 159.08154; 160.07679; 162.09244; 176.14447; 190.08735; 202.12374; 204.13939; 273.16085; 292.13430; 293.16594; 294.14995; 320.16560; 321.19724; 322.18125; 337.19215; 349.19215; 363.20780; 365.22345	10.82; 72.05; 5.14; 8.68; 7.78; 3.48; 28.92; 11.39; 4.33; 5.76; 8.20; 4.18; 16.83; 9.26; 16.46; 14.69; 3.49; 16.39; 4.16; 14.47; 5.78; 100.00	77.03967; 84.08187; 86.06114; 91.05532; 157.06589; 158.06114; 159.08154; 160.11317; 161.09719; 162.09244; 188.10809; 190.08735; 237.12849; 242.11865; 244.13430; 248.10809; 250.12374; 290.11865; 292.13430; 294.14995; 296.16560; 304.13430; 306.14995; 307.18159; 320.16560; 322.18125; 335.17650; 335.21289; 337.19215; 349.19215; 365.22345	19.16; 14.07; 14.32; 51.42; 14.21; 13.80; 58.85; 72.79; 45.70; 17.87; 32.91; 15.40; 14.41; 33.92; 34.51; 23.78; 32.70; 22.80; 100.00; 70.11; 16.09; 22.11; 21.04; 26.52; 47.99; 24.37; 14.78; 21.65; 24.78; 18.25; 17.12
904	168.08187	169.0891494	C12H11N	C1=CC=C(C=C1)C2=CC=CC=C2N	142.06622; 168.08187	0.13; 100.00	142.06622; 168.08187	2.59; 100.00	64.01927; 91.05532; 101.03967; 103.05532; 115.05532; 116.05057; 118.06622; 139.05532; 140.05057; 142.06622; 152.05057; 168.08187	17.60; 17.18; 13.08; 12.89; 17.86; 100.00; 15.40; 16.03; 27.93; 17.88; 15.52; 43.90
905	122.9451	123.95238	C2H5BrO	C(CBr)O	43.01894; 122.94510	95.57; 100.00	78.91889; 122.94510	100.00; 1.61	78.91889; 122.94510	100.00; 2.65
906	367.94947	368.95675	C15H10BrClFNO2	C1=CC=C(C(=C1)C(=O)C2=C(C=CC(=C2)Cl)NC(=O)CBr)F	271.91194; 367.94947	15.75; 100.00	151.99086; 248.02839; 271.91194; 274.00766; 367.94947	24.66; 38.82; 13.21; 40.70; 100.00	34.96940; 40.01927; 78.91889; 129.03459; 147.02517; 151.99086; 178.00652; 180.02217; 203.98578; 206.00143; 248.02839; 274.00766; 297.92759; 299.94324; 321.92759; 341.93382	21.30; 24.74; 100.00; 13.88; 12.75; 42.86; 52.15; 17.75; 16.48; 19.76; 12.24; 15.34; 20.22; 9.37; 13.14; 13.06
907	212.95567	213.96294	C8H7BrO2	C1=CC(=CC=C1C(=O)CBr)O	93.03459; 212.95567	22.13; 100.00	93.03459; 119.01385; 212.95567	100.00; 26.80; 76.63	41.00329; 63.02402; 65.00329; 65.03967; 67.01894; 78.91889; 93.03459; 118.91380; 182.94510; 194.94510; 212.95567	12.04; 9.48; 13.97; 11.68; 8.93; 38.50; 100.00; 15.39; 13.74; 8.58; 10.64
908	198.94002	199.94729	C7H5BrO2	C1=CC(=C(C=C1O)C=O)Br	170.94510; 198.94002	100.00; 70.99	78.91889; 170.94510	100.00; 39.40	78.91889; 130.91380	100.00; 1.51
909	211.91751	212.92478	C7H4BrNS	C1=CC=C2C(=C1)N=C(S2)Br	161.90186; 211.91751	0.10; 100.00	185.90186; 211.91751	0.87; 100.00	185.90186; 211.91751	7.84; 100.00
910	134.98149	135.98876	C4H9Br	CCC(C)Br	78.91889; 134.98149	2.84; 100.00	78.91889; 134.98149	50.93; 100.00	78.91889; 134.98149	100.00; 0.02
911	333.14347	334.15074	C16H31BrO2	CCCCCCCCCCCCCCC(C(=O)O)Br	289.15364; 333.14347	3.19; 100.00	78.91889; 289.15364; 333.14347	61.70; 18.86; 100.00	44.99820; 71.08662; 78.91889; 127.14922; 136.92436; 137.13357; 139.14922; 141.16487; 151.14922; 153.16487; 155.18052; 160.99714; 163.01279; 167.18052; 175.01279; 177.02844; 217.05974; 253.21730; 287.13799; 303.09652; 333.14347	100.00; 1.90; 34.62; 1.77; 2.74; 1.90; 2.15; 1.83; 3.06; 2.79; 2.94; 2.15; 1.82; 1.37; 2.17; 1.89; 1.22; 1.79; 1.76; 1.27; 5.27
912	120.96584	121.97311	C3H7Br	CC(C)Br	78.91889; 120.96584	6.20; 100.00	78.91889; 120.96584	100.00; 23.82	78.91889; 120.96584	100.00; 1.17
913	150.94002	151.94729	C3H5BrO2	CC(C(=O)O)Br	78.91889; 150.94002	13.69; 100.00	78.91889; 150.94002	100.00; 1.95	78.91889; 106.95019	100.00; 0.74
914	168.96584	169.97311	C7H7Br	CC1=CC=CC=C1Br	140.93454; 168.96584	2.17; 100.00	75.02402; 168.96584	1.59; 100.00	49.00837; 63.02402; 65.03967; 126.91889; 168.96584	37.85; 37.89; 44.40; 37.91; 100.00
915	72.08187	73.08914936	C4H11N	CCC(C)N	70.06622; 72.08187	3.14; 100.00	70.06622; 72.08187	37.69; 100.00	42.03492; 56.05057; 72.08187	46.93; 72.65; 100.00
916	89.04305	90.05032149	C4H10S	CCC(C)S	87.02739; 89.04304	5.04; 100.00	87.02739; 89.04304	21.76; 100.00	32.98044; 89.04304	100.00; 7.28
917	73.06589	74.07316494	C4H10O	CCC(C)O	71.05024; 73.06589	3.66; 100.00	43.01894; 73.06589	41.00; 100.00	55.05532; 57.03459; 73.06589	59.79; 100.00; 53.12
918	86.06114	87.06841391	C4H9NO	CCC(=NO)C	40.01927; 86.06114	5.11; 100.00	40.01927; 68.05057; 86.06114	46.27; 29.60; 100.00	40.01927; 52.01927; 56.01419; 68.05057	100.00; 13.23; 45.42; 70.47
919	87.04515	88.05242949	C4H8O2	C(C=CCO)O	57.03459; 87.04515	39.72; 100.00	51.02402; 57.03459; 69.03459	24.51; 19.23; 100.00	39.02402; 43.01894; 51.02402; 55.01894; 57.03459	100.00; 38.50; 77.71; 77.68; 94.50
920	85.0295	86.03677943	C4H6O2	CC=CC(=O)O	67.01894; 85.02950	1.65; 100.00	59.01385; 85.02950	17.13; 100.00	41.00329; 41.03967; 49.00837; 67.01894	100.00; 43.19; 36.77; 56.34
921	117.0921	118.0993797	C6H14O2	CCCCOCCO	59.01385; 73.06589; 117.09210	46.54; 100.00; 44.07	43.01894; 59.01385; 61.02950; 71.05024; 73.06589; 117.09210	31.60; 93.62; 71.78; 46.90; 100.00; 70.29	41.00329; 59.01385	45.20; 100.00
922	159.10267	160.1099444	C8H16O3	CCCCOCCOC(=O)C	43.01894; 59.01385; 71.05024; 73.06589; 99.08154	34.20; 100.00; 43.72; 79.80; 81.06	41.00329; 59.01385	2.71; 100.00	41.00329; 59.01385	37.22; 100.00
923	202.08735	203.0946287	C12H13NO2	CCCCN1C(=O)C2=CC=CC=C2C1=O	146.02475; 202.08735	6.71; 100.00	146.02475; 202.08735	95.31; 100.00	41.99854; 146.02475	16.33; 100.00
924	159.13905	160.1463299	C9H20O2	CCCCC(CC)(CO)CO	129.12849; 159.13905	11.11; 100.00	111.11792; 127.11284; 129.12849; 159.13905	100.00; 36.74; 50.13; 27.12	29.00329; 83.05024; 85.06589; 97.10227; 99.08154; 99.11792; 101.09719; 111.11792; 113.09719; 115.11284; 125.09719; 127.11284; 129.12849; 157.12340	16.96; 8.32; 14.32; 100.00; 23.81; 37.68; 27.88; 19.54; 10.40; 10.54; 27.55; 9.58; 39.95; 11.07
925	85.0295	86.03677943	C4H6O2	C(C#CCO)O	67.01894; 85.02950	23.60; 100.00	43.01894; 49.00837; 67.01894	18.36; 36.68; 100.00	41.00329; 49.00837; 55.01894; 65.00329	52.39; 100.00; 72.66; 76.53
926	143.03498	144.0422587	C6H8O4	C=CC(=O)OCCC(=O)O	71.01385; 89.02442	35.15; 100.00	43.01894; 59.01385; 71.01385; 89.02442	13.10; 14.03; 100.00; 21.91	59.01385; 71.01385	100.00; 63.22
927	199.05313	200.0604073	C10H13ClO2	CCOC1=CC(=C(C=C1)OCC)Cl	171.02183; 199.05313	13.10; 100.00	34.96940; 43.01894; 45.03459; 140.97488; 142.99053; 171.02183; 199.05313	91.70; 29.34; 38.37; 72.02; 38.54; 60.20; 100.00	34.96940; 41.00329; 43.01894; 140.97488; 142.99053	100.00; 16.41; 8.64; 31.24; 25.50
928	171.02183	172.0291072	C8H9ClO2	COC1=CC(=C(C=C1)OC)Cl	34.96940; 171.02183	51.79; 100.00	34.96940; 171.02183	100.00; 12.65	34.96940; 55.01894	100.00; 6.89
929	155.02692	156.0341926	C8H9ClO	CC1=CC(=C(C=C1C)Cl)O	34.96940; 155.02692	19.97; 100.00	34.96940; 155.02692	100.00; 14.54	34.96940; 41.00329	100.00; 1.40
930	154.0429	155.050177	C8H10ClN	CC1=CC(=C(C(=C1)Cl)N)C	34.96940; 154.04290	39.27; 100.00	34.96940; 118.06622	100.00; 0.59	34.96940; 152.02725	100.00; 0.45
931	141.01127	142.0185425	C7H7ClO	CC1=CC(=C(C=C1)Cl)O	99.00070; 141.01127	1.30; 100.00	113.01635; 141.01127	12.40; 100.00	41.00329; 65.00329; 113.01635; 141.01127	21.01; 37.90; 56.31; 100.00
932	227.89468	228.90196	C6H3Cl4N	C1=CC(=NC=C1C(Cl)(Cl)Cl)Cl	200.88378; 227.89468	0.41; 100.00	200.88378; 227.89468	5.66; 100.00	85.98030; 227.89468	2.74; 100.00
933	153.01127	154.0185425	C8H7ClO	C1=CC=C(C=C1)C(=O)CCl	77.03967; 153.01127	20.85; 100.00	77.03967; 153.01127	51.48; 100.00	34.96940; 49.00837; 51.02402; 74.96432; 77.03967; 124.97997; 126.99562; 135.00070; 150.99562	63.04; 41.01; 75.00; 34.06; 100.00; 33.09; 27.19; 30.53; 46.57
934	126.0116	127.0188769	C6H6ClN	C1=CC=C(C(=C1)N)Cl	66.03492; 126.01160	2.66; 100.00	64.01927; 126.01160	1.91; 100.00	34.96940; 40.01927; 64.01927; 66.03492; 82.96940; 126.01160	43.05; 47.35; 100.00; 33.30; 56.87; 77.43
935	211.032	212.039278	C14H9Cl	C1=CC=C2C=C3C=C(C=CC3=CC2=C1)Cl	185.01635; 211.03200	0.07; 100.00	185.01635; 211.03200	0.28; 100.00	185.01635; 211.03200	6.13; 100.00
936	241.00618	242.0134572	C14H7ClO2	C1=CC=C2C(=C1)C(=O)C3=C(C2=O)C=C(C=C3)Cl	214.99053; 241.00618	0.05; 100.00	214.99053; 241.00618	1.02; 100.00	181.02950; 241.00618	27.48; 100.00
937	138.99562	140.0028925	C7H5ClO	C1=CC=C(C(=C1)C=O)Cl	111.00070; 138.99562	100.00; 52.57	34.96940; 111.00070	100.00; 31.80	34.96940; 111.00070	100.00; 3.95
938	189.9735	190.9807773	C6H6ClNO2S	C1=CC=C(C(=C1)S(=O)(=O)N)Cl	77.96552; 189.97350	9.66; 100.00	77.96552; 189.97350	42.05; 100.00	77.96552; 79.98117; 127.98117; 129.99682	87.40; 100.00; 24.11; 25.29
939	154.99053	155.9978071	C7H5ClO2	C1=CC=C(C(=C1)C(=O)O)Cl	111.00070; 154.99053	100.00; 17.97	82.96940; 111.00070	1.78; 100.00	82.96940; 111.00070	17.90; 100.00
940	178.98809	179.9953623	C7H4ClF3	C1=CC=C(C(=C1)C(F)(F)F)Cl	128.97244; 178.98809	0.09; 100.00	82.96940; 178.98809	1.48; 100.00	119.01141; 178.98809	6.74; 100.00
941	158.97738	159.9846556	C7H6Cl2	C1=CC=C(C(=C1)CCl)Cl	99.00070; 158.97738	0.04; 100.00	108.98505; 158.97738	5.75; 100.00	34.96940; 82.96940; 158.97738	68.78; 78.69; 100.00
942	91.032	92.039278	C4H9Cl	CCC(C)Cl	89.01635; 91.03200	2.51; 100.00	34.96940; 91.03200	39.81; 100.00	34.96940; 75.00070	100.00; 0.77
943	131.02692	132.0341926	C6H9ClO	C1CCC(=O)C(C1)Cl	95.05024; 131.02692	15.75; 100.00	34.96940; 131.02692	100.00; 4.61	34.96940; 41.00329	100.00; 3.91
944	244.01708	245.0243562	C13H8ClNO2	C1=CC=C2C(=C1)NC(=O)C3=C(O2)C=CC(=C3)Cl	194.00143; 244.01708	0.14; 100.00	106.02984; 244.01708	8.18; 100.00	111.00070; 194.00143; 218.00143; 244.01708	38.77; 33.57; 78.01; 100.00
945	78.99562	80.0028925	C2H5ClO	C(CCl)O	43.01894; 78.99562	20.91; 100.00	34.96940; 78.99562	100.00; 1.06	34.96940; 43.01894	100.00; 19.74
946	133.00618	134.0134572	C5H7ClO2	C=CC(=O)OCCCl	34.96940; 68.99820; 71.01385; 76.97997	74.16; 41.59; 100.00; 27.70	34.96940; 71.01385	100.00; 50.60	34.96940; 71.01385	37.03; 100.00
947	123.00407	124.0113492	C4H9ClS	CCSCCCl	34.96940; 61.01174	57.05; 100.00	58.99609; 61.01174	100.00; 64.62	34.96940; 61.01174	100.00; 49.48
948	259.94833	260.9556	C9H9BrClNO	CC1=C(C=CC(=C1)Br)NC(=O)CCl	183.97673; 223.97165; 259.94833	100.00; 73.70; 58.78	34.96940; 78.91889; 183.97673; 209.95600; 259.94833	100.00; 62.31; 57.32; 76.58; 34.34	34.96940; 40.01927; 78.91889; 80.05057; 94.02984; 197.95600; 209.95600; 231.91703; 257.93268	27.46; 5.75; 100.00; 4.35; 3.55; 4.22; 6.63; 10.41; 10.73
949	122.00143	123.0087061	C3H6ClNO2	C(C(=O)NCO)Cl	41.00329; 86.02475	85.84; 100.00	34.96940; 41.99854; 44.01419; 91.99086	100.00; 63.45; 98.05; 61.44	41.99854; 44.01419	23.90; 100.00
950	201.99626	203.003532	C6H12Cl3N	C(CCl)N(CCCl)CCCl	166.01958; 201.99626	90.86; 100.00	34.96940; 116.02725; 166.01958	100.00; 37.77; 52.19	34.96940; 130.04290	100.00; 0.71
951	161.01635	162.0236279	C10H7Cl	C1=CC=C2C=C(C=CC2=C1)Cl	135.00070; 161.01635	0.15; 100.00	135.00070; 161.01635	0.92; 100.00	135.00070; 161.01635	12.07; 100.00
952	168.02217	169.0294416	C8H8ClNO	C1=CC=C(C=C1)NC(=O)CCl	92.05057; 168.02217	62.14; 100.00	92.05057; 118.02984	100.00; 31.25	40.01927; 92.05057	5.55; 100.00
953	126.99562	128.0028925	C6H5ClO	C1=CC=C(C(=C1)O)Cl	99.00070; 126.99562	2.27; 100.00	34.96940; 126.99562	12.27; 100.00	34.96940; 41.00329; 51.02402; 65.00329; 82.96940	63.00; 100.00; 28.09; 69.81; 36.36
954	231.99932	233.0065981	C12H8ClNS	C1=CC=C2C(=C1)NC3=C(S2)C=CC(=C3)Cl	205.98367; 231.99932	0.31; 100.00	205.98367; 231.99932	0.39; 100.00	172.02264; 231.99932	23.77; 100.00
955	106.99053	107.9978071	C3H5ClO2	CC(C(=O)O)Cl	71.01385; 106.99053	14.86; 100.00	34.96940; 106.99053	100.00; 26.49	34.96940; 63.00070	100.00; 28.53
956	111.99595	113.0032268	C5H4ClN	C1=CC=NC(=C1)Cl	85.98030; 111.99595	3.52; 100.00	34.96940; 111.99595	3.39; 100.00	50.00362; 52.01927; 111.99595	37.00; 48.27; 100.00
957	125.01635	126.0236279	C7H7Cl	CC1=CC=CC=C1Cl	96.98505; 125.01635	2.17; 100.00	75.02402; 125.01635	1.59; 100.00	49.00837; 63.02402; 65.03967; 82.96940; 125.01635	37.85; 37.89; 44.40; 37.91; 100.00
958	124.0404	125.0476785	C6H7NO2	C=CC(=O)OCCC#N	70.02984; 71.01385	100.00; 81.41	53.00329; 68.99820; 71.01385	15.36; 23.87; 100.00	53.00329; 71.01385	18.77; 100.00
959	95.05024	96.05751487	C6H8O	C1CC=CC(=O)C1	67.01894; 95.05024	2.51; 100.00	93.03459; 95.05024	27.79; 100.00	69.03459; 93.03459	3.04; 100.00
960	169.1234	170.1306798	C10H18O2	CC(=O)OCCC1CCCCC1	59.01385; 169.12340	93.11; 100.00	59.01385; 95.08662	100.00; 24.18	41.00329; 59.01385	100.00; 94.48
961	111.04515	112.0524295	C6H8O2	CC=CC=CC(=O)O	67.05532; 111.04515	67.05; 100.00	59.01385; 67.05532; 75.02402; 93.03459; 111.04515	24.43; 29.35; 41.80; 61.32; 100.00	49.00837; 51.02402; 63.02402; 65.03967; 67.05532	49.52; 61.67; 94.73; 100.00; 48.92
962	157.04188	158.0491556	C6H7FN2O2	CCOC1=NC=C(C(=O)N1)F	113.01566; 114.03607; 129.01058; 157.04188	37.38; 12.83; 18.27; 100.00	18.99895; 41.99854; 44.01419; 86.00477; 101.01566; 113.01566; 129.01058; 157.04188	14.01; 93.50; 19.43; 9.67; 20.44; 27.99; 100.00; 32.79	41.99854; 58.00985; 65.99854; 68.01419	100.00; 5.16; 11.81; 5.21
963	136.07679	137.084064	C8H11NO	CCOC1=CC=CC=C1N	108.04549; 136.07679	58.47; 100.00	43.01894; 92.05057; 106.02984; 108.04549; 134.06114; 136.07679	5.40; 17.72; 17.70; 100.00; 5.38; 9.39	40.01927; 41.00329; 51.02402; 53.03967; 64.01927; 65.00329; 66.03492; 76.01927; 92.05057; 106.02984; 108.04549; 134.06114	5.33; 10.56; 10.14; 9.91; 8.40; 10.10; 28.83; 5.27; 40.53; 6.75; 100.00; 6.21
964	164.0717	165.0789786	C9H11NO2	CCOC1=CC=CC=C1C(=O)N	41.99854; 164.07170	21.50; 100.00	41.99854; 77.03967; 93.03459; 136.04040	93.29; 24.94; 100.00; 52.03	41.99854; 93.03459	100.00; 5.04
965	89.0608	90.06807956	C4H10O2	CCOCCO	59.01385; 61.02950	100.00; 83.96	43.01894; 59.01385; 61.02950; 71.05024; 89.06080	35.88; 100.00; 80.35; 32.37; 58.91	43.01894; 59.01385	48.79; 100.00
966	157.08702	158.0942943	C8H14O3	CCOCCOC(=O)C(=C)C	43.01894; 85.02950; 87.04515; 129.05572	10.20; 100.00; 19.65; 15.61	41.03967; 45.03459; 85.02950; 87.04515	9.71; 10.40; 100.00; 15.71	41.00329; 41.03967; 43.01894; 45.03459; 65.00329; 85.02950	22.87; 100.00; 23.26; 38.87; 30.76; 52.67
967	145.1234	146.1306798	C8H18O2	CCCC(C(CC)CO)O	43.01894; 71.05024; 83.05024; 97.06589; 115.11284; 127.11284; 145.12340	5.62; 6.61; 5.31; 14.43; 6.08; 48.36; 100.00	43.05532; 53.03967; 55.05532; 57.07097; 71.05024; 73.06589; 83.05024; 97.06589; 101.06080; 125.09719; 127.11284; 143.10775; 145.12340	13.67; 20.35; 32.82; 15.44; 27.37; 31.67; 100.00; 15.58; 64.65; 29.90; 57.55; 13.00; 43.67	41.03967; 43.01894; 43.05532; 53.03967; 55.05532; 57.03459; 71.05024; 73.06589; 83.05024; 95.08662; 97.10227; 99.08154	73.89; 100.00; 51.94; 15.43; 28.25; 17.00; 30.56; 50.05; 11.37; 16.39; 18.05; 13.01
968	101.09719	102.1044651	C6H14O	CCC(CC)CO	99.08154; 101.09719	12.56; 100.00	55.05532; 83.08662; 99.08154; 101.09719	76.74; 100.00; 95.06; 44.67	53.03967; 57.07097; 67.05532; 69.07097; 71.08662; 83.08662; 101.09719	41.89; 40.36; 54.74; 30.69; 33.29; 100.00; 34.94
969	129.12849	130.1357652	C8H18O	CCCCC(CC)CO	99.11792; 129.12849	7.66; 100.00	57.07097; 81.07097; 97.10227; 109.10227; 111.11792; 127.11284; 129.12849	27.69; 21.02; 19.46; 32.20; 100.00; 26.51; 37.87	43.01894; 53.03967; 55.01894; 55.05532; 57.07097; 59.05024; 67.05532; 71.08662; 81.07097; 85.10227; 95.08662; 97.10227; 99.08154; 101.09719; 109.10227; 111.08154; 111.11792; 113.09719; 127.11284; 129.12849	25.04; 52.41; 47.06; 33.83; 100.00; 48.80; 66.03; 95.46; 78.57; 32.73; 40.10; 46.72; 65.74; 25.66; 29.86; 25.66; 63.58; 27.94; 68.35; 31.64
970	133.08702	134.0942943	C6H14O3	CCC(CO)(CO)CO	103.07645; 133.08702	67.57; 100.00	83.05024; 85.06589; 87.08154; 101.06080; 103.07645; 115.07645; 131.07137; 133.08702	35.00; 100.00; 24.45; 19.49; 24.56; 72.89; 21.17; 25.67	29.03967; 71.05024; 73.06589; 83.05024; 85.06589; 99.04515; 103.07645; 131.07137; 133.08702	33.23; 71.65; 51.44; 52.12; 76.20; 100.00; 57.85; 39.23; 46.69
971	125.09719	126.1044651	C8H14O	CCCC=C(CC)C=O	97.10227; 107.08662; 125.09719	8.30; 21.12; 100.00	53.03967; 67.01894; 71.05024; 93.07097; 95.08662; 97.10227; 107.08662; 125.09719	53.67; 92.02; 40.14; 43.91; 27.38; 34.69; 26.11; 100.00	51.02402; 53.03967; 55.01894; 55.05532; 63.02402; 65.03967; 67.05532; 69.07097; 77.03967; 81.07097; 91.05532; 93.07097; 97.10227	23.38; 31.19; 17.85; 41.83; 13.79; 28.37; 100.00; 37.19; 9.79; 22.07; 10.96; 12.15; 25.91
972	121.07712	122.0843983	C7H10N2	CCC1=NC=CN=C1C	93.04582; 121.07712	7.99; 100.00	40.01927; 53.01452; 55.03017; 63.02402; 65.03967; 67.05532; 79.03017; 80.05057; 93.04582; 119.06147; 121.07712	47.81; 10.66; 9.81; 6.46; 22.54; 12.10; 9.59; 7.40; 30.64; 9.17; 100.00	40.01927; 50.00362; 52.01927; 64.01927; 66.03492; 91.03017; 93.04582	100.00; 16.73; 10.32; 14.81; 22.16; 15.22; 38.63
973	109.07712	110.0843983	C6H10N2	CCC1=NC=C(N1)C	54.03492; 109.07712	4.08; 100.00	40.01927; 52.01927; 81.04582; 92.05057; 109.07712	6.84; 11.34; 19.89; 15.58; 100.00	39.02402; 40.01927; 50.00362; 52.01927; 54.03492; 56.05057; 81.04582	24.87; 100.00; 42.69; 68.51; 62.65; 40.69; 45.42
974	134.09752	135.1047994	C9H13N	CCC1=CC=CC(=C1N)C	106.06622; 134.09752	5.42; 100.00	105.07097; 106.06622; 107.08662; 117.07097; 134.09752	5.61; 6.23; 6.83; 5.94; 100.00	63.02402; 65.03967; 67.05532; 91.05532; 92.05057; 104.05057; 106.06622; 116.05057; 118.06622; 130.06622; 132.08187; 134.09752	32.28; 47.59; 15.65; 24.62; 14.04; 100.00; 95.63; 28.77; 97.13; 16.11; 61.31; 29.89
975	120.08187	121.0891494	C8H11N	CCC1=CC=CC=C1N	92.05057; 120.08187	7.59; 100.00	118.06622; 120.08187	22.88; 100.00	40.01927; 64.01927; 66.03492; 92.05057; 118.06622	8.50; 6.57; 5.40; 20.46; 100.00
976	235.07645	236.0837296	C16H12O2	CCC1=CC2=C(C=C1)C(=O)C3=CC=CC=C3C2=O	207.08154; 235.07645	1.66; 100.00	207.04515; 235.07645	20.02; 100.00	77.03967; 131.01385; 157.02950; 181.02950; 183.04515; 185.06080; 205.06589; 207.04515; 207.08154; 209.06080; 0.030746; 217.06589; 219.04515; 233.06080	34.91; 17.51; 25.51; 21.08; 27.33; 15.65; 28.17; 62.14; 100.00; 22.97; 0.028463); 26.47; 18.85; 15.03
977	99.08154	100.088815	C6H12O	CCC(CC)C=O	97.06589; 99.08154	1.39; 100.00	67.05532; 69.07097; 71.05024; 81.07097; 97.06589; 99.08154	50.56; 10.66; 12.30; 16.21; 13.42; 100.00	29.03967; 41.00329; 51.02402; 53.03967; 55.01894; 55.05532; 57.03459; 65.03967; 67.05532; 69.07097; 71.05024; 71.08662; 81.07097	37.83; 58.19; 89.05; 44.18; 26.69; 55.00; 29.45; 54.75; 82.39; 29.37; 35.45; 48.39; 100.00
978	127.11284	128.1201151	C8H16O	CCCCC(CC)C=O	99.11792; 127.11284	4.43; 100.00	55.05532; 57.07097; 95.08662; 97.10227; 99.08154; 99.11792; 127.11284	7.20; 14.42; 24.76; 21.07; 8.36; 14.45; 100.00	41.00329; 41.03967; 43.05532; 51.02402; 53.03967; 55.01894; 55.05532; 57.03459; 57.07097; 65.03967; 67.05532; 69.03459; 69.07097; 71.05024; 71.08662; 83.05024; 93.07097; 95.08662; 97.10227; 99.11792	62.33; 28.57; 62.05; 29.86; 100.00; 45.22; 31.42; 97.29; 73.92; 55.23; 45.29; 27.28; 37.33; 41.09; 98.66; 40.27; 39.43; 35.20; 46.62; 33.85
979	143.10775	144.1150297	C8H16O2	CCCCC(CC)C(=O)O	99.11792; 143.10775	6.86; 100.00	97.10227; 99.11792; 143.10775	37.19; 45.68; 100.00	44.99820; 71.08662	100.00; 3.81
980	161.07387	162.0811428	C8H15ClO	CCCCC(CC)C(=O)Cl	125.09719; 161.07387	12.91; 100.00	34.96940; 161.07387	100.00; 4.53	34.96940; 99.08154	100.00; 3.97
981	197.1547	198.1619799	C12H22O2	CCCCC(CC)COC(=O)C(=C)C	85.02950; 197.15470	44.81; 100.00	85.02950; 99.08154; 107.08662; 109.10227; 111.11792; 127.11284; 129.12849; 197.15470	100.00; 13.98; 24.82; 41.90; 20.76; 30.38; 56.87; 23.39	41.03967; 69.03459; 71.01385; 85.02950; 87.04515; 99.08154; 101.09719; 127.11284; 129.12849	80.67; 8.42; 24.81; 47.68; 7.74; 33.72; 37.95; 100.00; 14.78
982	276.1969	277.2041791	C17H27NO2	CCCCC(CC)COC(=O)C1=CC=C(C=C1)N(C)C	129.12849; 276.19690	5.74; 100.00	81.07097; 97.10227; 99.11792; 104.05057; 109.10227; 111.11792; 120.08187; 148.07679; 164.07170; 246.14995; 248.16560; 276.19690	4.62; 11.07; 5.84; 5.85; 4.86; 15.46; 36.67; 5.72; 27.26; 8.76; 11.15; 100.00	42.03492; 44.05057; 44.99820; 47.01385; 57.07097; 71.08662; 77.03967; 87.08154; 94.06622; 99.04515; 99.08154; 101.09719; 104.05057; 107.08662; 111.11792; 113.06080; 113.09719; 120.08187; 121.02950; 123.04515; 124.11317; 125.09719; 127.07645; 132.04549; 134.06114; 148.04040; 150.05605; 164.07170; 166.08735; 274.18125; 276.19690	14.37; 32.49; 15.58; 11.99; 7.37; 9.64; 8.32; 6.05; 16.98; 6.97; 33.66; 57.09; 69.49; 9.26; 7.54; 15.52; 20.38; 100.00; 13.57; 6.37; 5.79; 10.30; 8.89; 7.41; 6.87; 69.81; 13.17; 55.07; 19.87; 14.64; 10.51
983	171.13905	172.1463299	C10H20O2	CCCCC(CC)COC(=O)C	41.00329; 59.01385; 129.12849; 171.13905	36.67; 93.74; 100.00; 85.47	41.00329; 59.01385; 97.10227; 99.11792; 111.11792; 171.13905	11.81; 100.00; 15.32; 9.27; 15.55; 7.59	41.00329; 43.01894; 59.01385; 99.08154; 101.09719	100.00; 26.53; 98.66; 21.11; 35.84
984	183.13905	184.1463299	C11H20O2	CCCCC(CC)COC(=O)C=C	68.99820; 71.01385; 129.12849; 183.13905	50.84; 70.67; 66.46; 100.00	53.00329; 68.99820; 71.01385; 97.10227; 99.08154; 109.10227; 111.11792; 127.11284; 129.12849	28.42; 22.05; 100.00; 17.04; 13.08; 22.81; 20.32; 24.88; 46.65	53.00329; 55.01894; 68.99820; 71.01385; 99.08154; 101.09719; 109.10227; 127.11284; 129.12849	7.04; 21.94; 13.93; 61.19; 30.56; 39.25; 7.43; 100.00; 12.50
985	233.1547	234.1619799	C15H22O2	CCCCC(CC)COC(=O)C1=CC=CC=C1	121.02950; 233.15470	20.37; 100.00	77.03967; 111.11792; 121.02950; 127.07645; 233.15470	100.00; 7.68; 73.33; 7.52; 25.09	67.05532; 77.03967; 99.08154; 101.09719; 113.09719; 121.02950	1.85; 100.00; 5.92; 8.02; 2.61; 7.27
986	191.08443	192.0917075	C9H17ClO2	CCCCC(CC)COC(=O)Cl	127.11284; 191.08443	80.27; 100.00	34.96940; 78.95923	100.00; 21.37	34.96940; 78.95923	100.00; 3.08
987	196.1343	197.1415788	C11H19NO2	CCCCC(CC)COC(=O)CC#N	84.00910; 99.08154; 99.11792; 101.09719; 127.11284; 129.12849; 196.13430	7.81; 8.90; 12.31; 10.43; 31.48; 100.00; 23.75	40.01927; 65.99854; 68.01419; 84.00910; 97.10227; 99.11792; 105.07097; 107.08662; 109.10227; 111.11792; 121.06589; 125.09719; 127.11284; 129.12849; 196.13430	11.82; 81.97; 11.31; 100.00; 11.24; 7.37; 13.10; 11.13; 9.55; 30.06; 7.37; 6.21; 20.07; 24.65; 16.66	41.00329; 52.01927; 55.01894; 65.03967; 65.99854; 68.01419; 71.08662; 99.08154; 101.09719	2.33; 3.68; 3.86; 2.16; 100.00; 5.64; 2.34; 3.46; 4.49
988	361.15742	362.1646963	C20H27O4P	CCCCC(CC)COP(=O)(OC1=CC=CC=C1)OC2=CC=CC=C2	249.03222; 361.15742	11.66; 100.00	249.03222; 361.15742	100.00; 28.49	93.03459; 141.01109; 143.02674; 145.04239; 157.00600; 223.01657; 233.03730; 247.01657; 249.03222	100.00; 44.56; 21.05; 10.30; 11.00; 16.71; 7.13; 9.32; 45.49
989	185.1547	186.1619799	C11H22O2	CCCCC(CC)COCC1CO1	55.01894; 71.01385; 81.07097; 97.06589; 101.09719; 111.11792; 127.11284; 129.12849; 183.13905; 185.15470	30.08; 18.59; 17.25; 18.35; 16.76; 85.64; 39.45; 65.70; 21.18; 100.00	55.01894; 57.03459; 57.07097; 71.01385; 81.07097; 97.10227; 99.08154; 109.10227; 111.11792; 127.11284; 129.12849; 185.15470	90.38; 27.43; 41.57; 47.70; 30.22; 22.23; 21.10; 62.25; 100.00; 54.29; 39.54; 19.29	41.00329; 43.01894; 55.01894; 57.07097; 71.01385; 83.05024; 87.08154; 97.10227; 99.08154; 101.09719; 113.09719	58.52; 9.26; 38.63; 9.64; 14.53; 17.93; 9.64; 17.81; 62.55; 100.00; 25.07
990	395.38945	396.3967309	C26H52O2	CCCCCCCCCCCCCCCCCC(=O)OCC(CC)CCCC	99.11792; 395.38945	6.10; 100.00	59.01385; 97.10227; 99.11792; 107.08662; 109.10227; 111.11792; 113.13357; 127.11284; 129.12849; 265.25369; 267.26934; 283.26425; 395.38945	3.53; 7.76; 7.19; 3.91; 15.16; 11.00; 4.11; 4.79; 6.72; 37.62; 5.55; 21.45; 100.00	44.99820; 59.01385; 61.02950; 71.01385; 73.02950; 75.04515; 99.04515; 101.06080; 101.09719; 113.06080; 127.11284; 129.12849; 141.09210; 143.10775; 155.10775; 157.12340; 197.15470; 199.17035; 211.17035; 213.18600; 225.18600; 227.20165; 253.21730; 263.23804; 265.25369; 267.23295; 267.26934; 269.28499; 281.24860; 283.26425; 285.27990	23.67; 29.87; 11.75; 38.82; 16.22; 5.90; 9.20; 10.06; 5.35; 5.74; 15.61; 17.14; 8.81; 10.49; 5.79; 8.09; 5.56; 9.20; 6.16; 5.44; 10.17; 8.52; 6.05; 5.57; 25.32; 5.41; 31.31; 7.47; 19.36; 100.00; 11.81
991	209.09482	210.1020961	C8H19O4P	CCCCC(CC)COP(=O)(O)O	78.95905; 209.09482	37.42; 100.00	78.95905; 96.96962	100.00; 19.91	62.96414; 78.95905	3.46; 100.00
993	249.14962	250.1568946	C15H22O3	CCCCC(CC)COC(=O)C1=CC=C(C=C1)O	129.12849; 137.02442; 249.14962	8.62; 10.30; 100.00	93.03459; 97.10227; 111.11792; 121.02950; 137.02442; 143.07137; 221.11832; 249.14962	100.00; 8.63; 6.38; 11.57; 57.37; 12.15; 6.63; 74.79	41.00329; 67.01894; 77.03967; 93.03459; 99.08154; 101.09719; 105.03459; 109.02950; 119.01385; 121.02950; 137.02442; 139.04007	3.41; 3.21; 2.32; 100.00; 4.31; 5.58; 2.20; 2.21; 1.85; 6.43; 7.35; 1.88
994	249.14962	250.1568946	C15H22O3	CCCCC(CC)COC(=O)C1=CC=CC=C1O	119.01385; 129.12849; 137.02442; 249.14962	74.48; 14.60; 15.52; 100.00	93.03459; 105.07097; 109.10227; 119.01385; 121.02950; 137.02442; 249.14962	100.00; 3.83; 3.82; 4.04; 4.48; 17.23; 11.29	51.02402; 65.03967; 67.01894; 77.03967; 93.03459; 95.05024; 99.08154; 101.09719; 119.01385; 121.02950; 137.02442	2.74; 2.33; 2.36; 8.34; 100.00; 4.33; 4.04; 5.75; 6.52; 3.15; 3.89
995	203.11112	204.1184011	C10H20O2S	CCCCC(CC)COC(=O)CS	88.97027; 90.98592; 129.12849; 169.12340; 203.11112	12.47; 100.00; 21.04; 20.16; 22.46	32.98044; 41.00329; 46.99609; 72.97536; 74.99101; 90.98592; 97.10227; 111.11792; 129.12849	97.45; 21.98; 33.17; 27.44; 26.99; 100.00; 29.87; 35.39; 20.20	32.98044; 46.99609; 72.97536; 88.97027; 90.98592; 99.08154; 101.09719; 111.11792; 113.09719; 129.12849	33.06; 29.35; 30.65; 30.70; 100.00; 37.98; 65.93; 21.49; 26.16; 22.95
996	289.18092	290.1881947	C18H26O3	CCCCC(CC)COC(=O)C=CC1=CC=C(C=C1)OC	121.06589; 129.12849; 133.06589; 145.02950; 167.10775; 169.12340; 177.05572; 289.18092	7.44; 16.95; 6.72; 5.43; 4.81; 5.88; 20.62; 100.00	97.10227; 101.03967; 105.03459; 105.07097; 107.08662; 109.10227; 111.11792; 117.03459; 121.06589; 123.08154; 127.11284; 129.12849; 133.06589; 145.02950; 159.04515; 161.02442; 161.06080; 167.10775; 169.12340; 175.04007; 177.05572; 183.10267; 229.12340; 245.11832; 259.13397; 261.14962; 289.18092	21.16; 17.96; 17.28; 14.23; 16.79; 21.07; 35.42; 42.64; 33.82; 11.05; 17.06; 19.82; 96.47; 50.47; 33.30; 46.44; 25.82; 15.23; 18.80; 32.39; 83.39; 16.99; 32.83; 24.33; 22.60; 72.04; 100.00	41.00329; 55.01894; 99.08154; 101.09719; 105.03459; 117.03459; 119.05024; 121.06589; 131.05024; 133.06589; 143.01385; 145.02950; 159.04515; 161.02442; 161.06080; 175.04007; 177.05572; 231.10267; 245.11832	3.93; 2.20; 2.10; 5.09; 3.16; 100.00; 3.04; 2.65; 3.39; 30.98; 2.06; 14.33; 3.15; 2.46; 2.79; 2.24; 3.16; 2.09; 2.44
997	360.1969	361.2041791	C24H27NO2	CCCCC(CC)COC(=O)C(=C(C1=CC=CC=C1)C2=CC=CC=C2)C#N	167.08662; 248.07170; 360.19690	37.61; 100.00; 47.14	77.03967; 97.10227; 126.03492; 167.08662; 169.10227; 192.10300; 204.08187; 205.06589; 206.09752; 210.12882; 232.07679; 248.07170; 254.11865; 282.14995; 290.11865; 302.11865; 304.13430; 305.15470; 330.14995; 332.16560; 360.19690	5.43; 5.90; 4.96; 49.22; 13.79; 5.91; 100.00; 10.79; 12.27; 6.84; 8.98; 49.42; 11.27; 6.07; 5.33; 7.53; 9.70; 10.38; 12.83; 60.89; 46.09	77.03967; 126.03492; 167.08662; 204.08187; 248.07170	7.02; 13.79; 6.60; 100.00; 4.52
998	128.14447	129.1517496	C8H19N	CCCCC(CC)CN	126.12882; 128.14447	1.51; 100.00	126.12882; 128.14447	75.99; 100.00	57.07097; 67.05532; 68.05057; 70.06622; 71.08662; 72.08187; 81.07097; 82.06622; 84.08187; 96.08187; 98.09752; 100.11317; 110.09752; 112.11317; 124.11317; 126.12882; 128.14447	15.37; 28.13; 18.75; 15.82; 24.55; 15.61; 18.82; 37.47; 37.31; 31.50; 71.80; 29.46; 46.25; 30.28; 19.70; 100.00; 32.83
999	121.06589	122.0731649	C8H10O	CCC1=CC=CC=C1O	119.05024; 121.06589	1.56; 100.00	41.00329; 93.03459; 103.05532; 121.06589	15.58; 13.18; 24.92; 100.00	41.00329; 49.00837; 51.02402; 63.02402; 65.00329; 65.03967; 67.05532; 77.03967; 93.03459	100.00; 10.06; 18.67; 23.45; 7.78; 13.27; 7.50; 6.49; 17.03
1000	103.07645	104.0837296	C5H12O2	CCC(CO)CO	73.06589; 103.07645	11.12; 100.00	55.01894; 55.05532; 69.03459; 71.05024; 73.06589; 83.05024; 85.06589; 101.06080; 103.07645	31.77; 19.05; 36.45; 66.11; 51.66; 25.11; 100.00; 30.40; 29.34	41.03967; 43.01894; 43.05532; 53.03967; 55.01894; 55.05532; 57.07097; 71.05024; 73.06589	27.83; 100.00; 49.90; 38.78; 60.09; 26.93; 23.19; 32.99; 21.05
1001	76.02042	77.02769191	C2H4FNO	C(C(=O)N)F	41.99854; 76.02042	10.00; 100.00	41.99854; 76.02042	42.89; 100.00	41.99854; 76.02042	100.00; 5.98
1002	156.98619	157.9934706	C7H4ClFO	C1=CC=C(C(=C1)C(=O)Cl)F	34.96940; 156.98619	11.20; 100.00	34.96940; 156.98619	100.00; 31.70	18.99895; 34.96940; 49.00837; 51.02402; 66.99895	16.23; 100.00; 13.37; 20.13; 27.16
1003	171.06155	172.0688284	C12H9F	C1=CC=C(C=C1)C2=CC=CC=C2F	119.03025; 171.06155	0.26; 100.00	145.04590; 171.06155	5.06; 100.00	119.03025; 121.04590; 143.03025; 145.04590	73.20; 82.30; 37.52; 100.00
1004	111.02517	112.0324429	C6H5FO	C1=CC=C(C(=C1)O)F	83.03025; 111.02517	2.62; 100.00	81.01460; 111.02517	11.74; 100.00	18.99895; 41.00329; 51.02402; 65.00329; 66.99895	30.22; 100.00; 22.81; 74.73; 44.29
1005	111.00877	112.016044	C5H4O3	C1=COC(=C1)C(=O)O	67.01894; 111.00877	100.00; 5.93	49.00837; 67.01894	14.60; 100.00	41.00329; 49.00837	44.31; 100.00
1006	162.01967	163.026943	C8H5NO3	C1=CC=C2C(=C1)C(=O)OC(=O)N2	118.02984; 162.01967	75.22; 100.00	118.02984; 162.01967	74.88; 100.00	64.01927; 65.99854; 89.99854; 91.01894; 92.01419; 112.00402; 118.02984	18.25; 23.05; 18.86; 16.85; 30.35; 13.81; 100.00
1007	115.11284	116.1201151	C7H16O	CCCCCC(C)O	113.09719; 115.11284	2.26; 100.00	57.03459; 99.08154; 113.09719; 115.11284	35.31; 26.03; 20.37; 100.00	39.02402; 43.01894; 53.03967; 57.03459; 67.05532; 71.08662; 81.07097; 97.10227	11.03; 100.00; 22.26; 56.54; 24.80; 31.09; 11.16; 28.38
1008	113.09719	114.1044651	C7H14O	CCCCCC(=O)C	95.08662; 113.09719	5.17; 100.00	41.00329; 57.03459; 97.06589; 113.09719	16.68; 16.39; 18.69; 100.00	41.00329; 57.03459	93.85; 100.00
1009	181.15979	182.1670653	C12H22O	CCCCCCCC1CCCC1=O	163.14922; 181.15979	3.38; 100.00	81.03459; 163.14922; 181.15979	11.00; 6.63; 100.00	43.05532; 51.02402; 53.03967; 57.07097; 65.03967; 67.05532; 69.03459; 71.08662; 79.01894; 81.03459; 81.07097; 93.03459; 95.05024; 97.06589; 107.05024; 109.06589; 111.08154; 121.06589; 123.08154; 125.09719; 137.09719; 139.11284; 179.14414; 181.15979	14.65; 14.51; 12.44; 14.11; 20.84; 11.65; 10.81; 18.84; 11.22; 27.14; 9.29; 17.07; 100.00; 17.43; 24.17; 31.02; 20.82; 38.62; 45.69; 37.51; 24.02; 16.55; 9.22; 20.20
1010	241.25369	242.2609657	C16H34O	CCCCCCCCC(CCCCCC)CO	211.24312; 241.25369	7.95; 100.00	211.24312; 223.24312; 241.25369	28.28; 22.40; 100.00	57.07097; 59.05024; 67.05532; 71.08662; 87.08154; 101.09719; 113.09719; 113.13357; 115.11284; 125.09719; 127.11284; 127.14922; 129.12849; 141.12849; 141.16487; 157.15979; 167.18052; 169.15979; 171.17544; 181.19617; 183.17544; 185.19109; 197.19109; 199.20674; 209.22747; 211.20674; 211.24312; 213.22239; 223.24312; 225.22239; 241.25369	20.05; 22.97; 16.01; 19.93; 16.89; 22.28; 24.45; 27.05; 30.44; 64.11; 79.01; 21.50; 100.00; 17.68; 16.01; 16.31; 22.61; 31.04; 26.32; 17.40; 29.27; 21.30; 46.52; 23.09; 19.43; 24.63; 16.51; 18.71; 18.81; 25.60; 68.48
1011	255.23295	256.2402303	C16H32O2	CCCCCCCCC(CCCCCC)C(=O)O	211.24312; 255.23295	5.01; 100.00	211.24312; 255.23295	58.01; 100.00	44.99820; 55.05532; 125.06080; 125.13357; 127.07645; 127.14922; 129.09210; 141.16487; 153.16487; 155.10775; 155.18052; 167.18052; 169.12340; 169.19617; 171.13905; 181.12340; 181.19617; 183.13905; 185.15470; 195.21182; 197.15470; 199.17035; 201.18600; 211.17035; 211.24312; 213.18600; 225.18600; 227.20165; 237.22239; 239.20165; 255.23295	96.41; 47.84; 24.37; 28.46; 45.13; 35.77; 61.24; 37.81; 100.00; 25.35; 24.26; 73.83; 44.73; 33.85; 26.69; 23.16; 63.46; 71.13; 73.81; 27.97; 53.87; 41.94; 25.64; 69.97; 81.53; 38.38; 45.74; 30.91; 25.85; 36.52; 47.30
1012	145.1234	146.1306798	C8H18O2	CCCCCCOCCO	59.01385; 101.09719; 145.12340	31.59; 100.00; 50.39	59.01385; 61.02950; 101.09719	100.00; 53.41; 12.11	41.00329; 59.01385	55.87; 100.00
1013	205.05534	206.0626175	C9H10N4S	C1=CC(=CC=C1C2=CSC(=N2)NN)N	148.02264; 205.05534	2.56; 100.00	146.00699; 148.02264; 175.03354; 205.05534	10.86; 51.94; 39.42; 100.00	57.97569; 80.98044; 104.05057; 116.05057; 122.00699; 146.00699; 148.02264; 152.02879; 175.03354	28.60; 20.38; 61.32; 51.47; 19.31; 100.00; 74.65; 42.04; 22.54
1014	190.04444	191.0517185	C9H9N3S	C1=CC=C(C=C1)C2=CSC(=N2)NN	160.02264; 190.04444	6.37; 100.00	57.97569; 133.01174; 135.02739; 160.02264; 190.04444	11.26; 100.00; 13.55; 23.84; 31.76	32.98044; 57.97569; 106.99609; 107.99134; 133.01174; 160.02264	13.24; 65.27; 8.83; 15.44; 100.00; 39.14
1015	223.09758	224.104859	C12H16O4	CC(C)(C(=O)C1=CC=C(C=C1)OCCO)O	161.06080; 223.09758	100.00; 53.95	57.03459; 93.03459; 119.01385; 121.02950; 125.06080; 161.06080; 163.07645; 179.07137; 223.09758	10.69; 21.01; 10.35; 14.48; 7.71; 21.74; 26.04; 100.00; 6.83	57.03459; 59.05024; 77.03967; 93.03459; 111.04515; 119.01385; 121.02950; 145.06589; 147.04515; 151.07645; 161.06080; 163.04007; 163.07645; 179.07137	12.96; 11.53; 19.23; 65.52; 11.00; 18.42; 59.66; 36.80; 15.89; 16.12; 100.00; 39.25; 16.98; 15.19
1016	84.04549	85.05276385	C4H7NO	CC(C)(C#N)O	66.03492; 84.04549	8.05; 100.00	66.03492; 84.04549	43.61; 100.00	50.00362; 66.03492	36.43; 100.00
1017	163.07645	164.0837296	C10H12O2	CC(C)(C(=O)C1=CC=CC=C1)O	145.06589; 163.07645	54.05; 100.00	77.03967; 105.03459; 163.07645	55.83; 75.33; 100.00	43.01894; 51.02402; 57.03459; 59.05024; 77.03967; 95.05024; 105.03459; 111.04515; 129.03459; 145.06589	7.15; 10.58; 14.54; 8.89; 100.00; 6.10; 6.43; 6.81; 11.24; 7.40
1018	151.04007	152.0473441	C8H8O3	CC1=C(C(=CC=C1)C(=O)O)O	107.05024; 151.04007	100.00; 34.81	105.03459; 107.05024	4.81; 100.00	51.02402; 63.02402; 65.00329; 65.03967; 75.02402; 79.05532; 105.03459; 107.05024	16.21; 18.20; 14.25; 16.65; 12.98; 24.34; 18.56; 100.00
1019	221.08193	222.0892089	C12H14O4	C=CC(=O)OCC(COC1=CC=CC=C1)O	43.01894; 57.03459; 68.99820; 71.01385; 73.02950; 75.04515; 89.02442; 93.03459; 167.07137; 221.08193	16.76; 11.80; 27.99; 23.15; 55.68; 9.73; 11.40; 100.00; 10.17; 19.81	71.01385; 93.03459	11.50; 100.00	71.01385; 93.03459	11.76; 100.00
1020	227.07137	228.0786442	C14H12O3	COC1=CC(=C(C=C1)C(=O)C2=CC=CC=C2)O	149.02442; 227.07137	5.16; 100.00	77.03967; 93.03459; 105.03459; 123.04515; 143.05024; 197.06080; 227.07137	14.62; 3.71; 12.72; 17.56; 3.83; 5.33; 100.00	41.00329; 55.01894; 65.00329; 77.03967; 93.03459; 121.02950; 129.03459; 131.05024; 143.05024; 147.04515; 153.03459; 155.05024; 167.05024; 169.02950; 175.04007; 183.04515; 197.06080	21.44; 15.52; 16.66; 100.00; 13.35; 32.69; 35.12; 12.88; 10.14; 12.87; 15.58; 19.13; 22.73; 13.88; 11.59; 21.31; 22.38
1021	211.07645	212.0837296	C14H12O2	CC1=CC(=C(C=C1)O)C(=O)C2=CC=CC=C2	133.02950; 211.07645	8.09; 100.00	77.03967; 107.05024; 211.07645	31.20; 33.95; 100.00	77.00329; 77.03967; 79.01894; 81.03459; 103.01894; 105.03459; 107.05024; 129.03459; 131.05024; 133.02950; 143.05024; 153.03459; 159.04515	18.31; 100.00; 30.90; 13.37; 8.85; 21.00; 12.22; 35.39; 32.57; 27.06; 13.24; 10.86; 18.41
1022	150.05605	151.0633285	C8H9NO2	CC(=O)NC1=CC=CC=C1O	108.04549; 150.05605	44.13; 100.00	108.04549; 132.04549	100.00; 6.20	41.00329; 51.02402; 53.03967; 58.02984; 64.01927; 65.00329; 66.03492; 67.01894; 76.01927; 78.03492; 80.05057; 106.02984; 108.04549; 120.04549; 130.02984; 132.04549; 134.02475; 148.04040	22.00; 5.99; 5.98; 6.71; 8.95; 5.95; 8.66; 7.47; 8.37; 13.41; 13.45; 9.64; 100.00; 7.53; 5.15; 8.22; 10.61; 6.38
1023	135.04515	136.0524295	C8H8O2	CC(=O)C1=CC=CC=C1O	93.03459; 135.04515	12.55; 100.00	93.03459; 135.04515	97.69; 100.00	41.00329; 49.00837; 65.00329; 65.03967; 67.01894; 87.02402; 89.03967; 91.01894; 93.03459; 117.03459; 119.01385	100.00; 32.96; 53.76; 64.41; 42.15; 41.03; 38.81; 62.21; 68.84; 70.80; 75.43
1024	223.04007	224.0473441	C14H8O3	C1=CC=C2C(=C1)C(=O)C3=C(C2=O)C=C(C=C3)O	77.03967; 223.04007	0.27; 100.00	195.04515; 223.04007	1.61; 100.00	119.01385; 181.02950; 195.04515; 223.04007	27.38; 35.70; 100.00; 60.43
1025	118.02984	119.0371138	C7H5NO	C1=CC=C(C(=C1)C#N)O	64.01927; 118.02984	0.16; 100.00	88.01927; 118.02984	3.74; 100.00	41.00329; 64.01927; 65.00329; 88.01927; 90.03492; 118.02984	19.63; 35.67; 18.44; 100.00; 19.70; 15.94
1026	197.0608	198.0680796	C13H10O2	C1=CC=C(C=C1)C(=O)C2=CC=CC=C2O	77.03967; 197.06080	31.56; 100.00	77.03967; 93.03459; 197.06080	17.88; 15.37; 100.00	41.00329; 63.02402; 65.00329; 77.03967; 89.00329; 91.01894; 119.01385; 129.03459; 143.05024; 151.05532; 153.03459; 167.05024	20.59; 35.31; 16.87; 51.15; 70.54; 72.64; 25.75; 28.80; 14.17; 14.79; 23.87; 100.00
1027	115.04007	116.0473441	C5H8O3	C=CC(=O)OCCO	59.01385; 71.01385	66.40; 100.00	59.01385; 71.01385	11.29; 100.00	43.01894; 59.01385; 71.01385	20.63; 17.48; 100.00
1028	153.00495	154.0122219	C4H10O2S2	C(CSSCCO)O	32.98044; 58.99609; 74.99101; 77.00666; 78.96817; 153.00495	70.38; 46.87; 97.60; 100.00; 31.02; 93.18	32.98044; 64.95252; 74.99101	54.51; 58.94; 100.00	32.98044; 58.99609; 64.95252; 74.99101	79.70; 100.00; 64.57; 71.49
1029	129.05572	130.0629942	C6H10O3	CC(=C)C(=O)OCCO	59.01385; 85.02950	9.16; 100.00	43.01894; 85.02950	41.20; 100.00	41.03967; 43.01894; 85.02950	100.00; 37.19; 42.66
1030	327.29047	328.2977451	C20H40O3	CCCCCCCCCCCCCCCCCC(=O)OCCO	265.25369; 283.26425; 327.29047	97.11; 100.00; 74.28	43.01894; 59.01385; 61.02950; 239.27442; 265.25369; 267.26934; 283.26425; 309.27990; 327.29047	64.43; 56.18; 15.67; 5.84; 100.00; 6.09; 91.19; 9.50; 33.95	43.01894; 44.99820; 59.01385; 61.02950; 71.01385; 73.02950; 75.04515; 85.02950; 99.04515; 101.06080; 113.06080; 115.07645; 141.09210; 143.10775; 145.12340; 155.10775; 157.12340; 197.15470; 199.17035; 201.18600; 211.17035; 213.18600; 225.18600; 227.20165; 239.20165; 253.21730; 265.25369; 267.26934; 281.24860; 283.26425; 309.27990	6.87; 26.56; 67.99; 34.66; 56.54; 21.74; 6.89; 8.22; 14.41; 11.82; 6.70; 5.79; 12.54; 9.52; 5.80; 8.12; 8.52; 8.05; 10.02; 6.10; 7.47; 6.22; 12.27; 9.87; 6.56; 8.55; 31.35; 7.33; 19.32; 100.00; 6.52
1031	189.13186	190.1391365	C10H22OS	CCCCCCCCSCCO	145.10565; 189.13186	100.00; 25.36	32.98044; 74.99101; 77.00666; 143.09000; 145.10565	18.51; 44.91; 19.05; 61.51; 100.00	32.98044; 43.01894; 46.99609; 58.99609; 61.01174; 73.01174; 74.99101; 75.02739; 77.00666; 89.04304; 117.07434; 143.09000; 145.10565	42.02; 35.12; 13.51; 100.00; 12.30; 21.66; 25.82; 32.21; 28.46; 28.01; 12.47; 17.78; 51.77
1032	181.05063	182.0579088	C9H10O4	C1=CC=C(C(=C1)C(=O)OCCO)O	93.03459; 137.02442	100.00; 99.02	59.01385; 93.03459	13.48; 100.00	65.03967; 77.03967; 93.03459	5.36; 7.45; 100.00
1033	75.05639	76.06366288	C2H8N2O	C(CO)NN	58.02984; 75.05639	1.72; 100.00	58.02984; 75.05639	100.00; 41.47	40.01927; 58.02984	96.85; 100.00
1034	181.06589	182.0731649	C13H10O	C1C2=CC=CC=C2C3=C1C=C(C=C3)O	179.05024; 181.06589	0.20; 100.00	151.05532; 181.06589	2.28; 100.00	151.05532; 153.07097; 181.06589	100.00; 18.71; 52.20
1035	103.04007	104.0473441	C4H8O3	CC(C)(C(=O)O)O	85.02950; 103.04007	10.62; 100.00	57.03459; 103.04007	40.19; 100.00	41.03967; 57.03459; 59.05024; 85.02950	22.53; 40.33; 58.25; 100.00
1036	143.07137	144.0786442	C7H12O3	CC(COC(=O)C(=C)C)O	57.03459; 85.02950	7.14; 100.00	43.01894; 57.03459; 85.02950; 99.04515	31.23; 77.03; 100.00; 22.72	41.03967; 43.01894; 57.03459; 59.01385; 85.02950	100.00; 63.26; 42.08; 19.37; 37.57
1037	230.96762	231.9749	C8H9I	C1=CC=C(C=C1)CCI	126.90502; 230.96762	21.13; 100.00	126.90502; 230.96762	100.00; 3.63	77.03967; 126.90502	0.74; 100.00
1038	303.94762	304.95489	C9H8INO3	C1=CC=C(C(=C1)C(=O)NCC(=O)O)I	202.93632; 259.95779; 303.94761	88.10; 100.00; 71.13	126.90502; 202.93632	100.00; 11.65	126.90502; 202.93632	100.00; 20.86
1039	140.05394	141.0612205	C7H11NS	CC(C)CC1=NC=CS1	82.06622; 140.05394	40.46; 100.00	32.98044; 40.01927; 56.98044; 71.99134; 82.06622; 140.05394	23.22; 21.20; 100.00; 40.19; 27.53; 49.05	40.01927; 56.98044; 64.01927; 66.03492; 71.99134; 83.99134; 99.02739	18.95; 100.00; 22.03; 56.00; 29.14; 73.10; 41.79
1040	103.07645	104.0837296	C5H12O2	CC(C)OCCO	59.05024; 103.07645	100.00; 21.71	57.03459; 59.05024	48.91; 100.00	43.01894; 57.03459; 59.05024	100.00; 83.11; 93.70
1041	151.07645	152.0837296	C9H12O2	CC(C)OC1=CC=CC=C1O	109.02950; 151.07645	100.00; 98.29	107.01385; 109.02950	7.02; 100.00	41.00329; 55.01894; 57.03459; 65.00329; 67.01894; 93.03459; 107.01385; 109.02950	53.97; 16.77; 34.99; 53.51; 85.33; 34.62; 16.64; 100.00
1042	163.11284	164.1201151	C11H16O	CC1=CC(=C(C=C1)C(C)C)OC	147.08154; 163.11284	1.49; 100.00	131.08662; 147.08154; 161.09719; 163.11284	18.16; 40.76; 77.87; 100.00	91.05532; 95.05024; 117.07097; 121.06589; 131.05024; 131.08662; 133.10227; 145.06589; 147.08154; 161.09719	18.14; 15.31; 30.91; 27.38; 64.99; 55.96; 33.42; 86.93; 41.14; 100.00
1043	151.08769	152.094963	C8H12N2O	CC1=CC(=O)NC(=N1)C(C)C	83.06147; 151.08769	7.11; 100.00	39.02402; 41.00329; 65.00329; 67.01894; 68.05057; 83.06147; 123.09277; 151.08769	67.00; 34.96; 100.00; 99.25; 65.26; 18.87; 30.09; 66.64	39.02402; 40.01927; 41.00329; 41.99854; 49.00837; 65.00329; 67.01894; 67.03017; 68.05057; 69.00944; 81.04582; 92.05057; 109.04074; 135.05639	14.37; 19.89; 100.00; 51.38; 8.87; 62.86; 22.16; 10.51; 14.00; 10.18; 10.13; 25.55; 16.17; 11.14
1044	135.08154	136.088815	C9H12O	CC(C)C1=CC=CC=C1O	133.06589; 135.08154	4.54; 100.00	93.03459; 133.06589; 135.08154	13.21; 76.09; 100.00	41.00329; 49.00837; 51.02402; 63.02402; 65.00329; 65.03967; 67.01894; 67.05532; 81.07097; 87.02402; 89.03967; 91.05532; 93.03459; 117.03459; 119.05024	100.00; 45.34; 25.99; 46.27; 47.37; 66.60; 23.02; 36.08; 17.85; 19.29; 34.26; 22.93; 72.13; 38.45; 66.14
1045	229.08702	230.0942943	C14H14O3	CC(C)CC(=O)C1C(=O)C2=CC=CC=C2C1=O	145.02950; 229.08702	86.25; 100.00	129.03459; 145.02950; 147.04515; 211.07645; 229.08702	8.81; 100.00; 8.10; 12.67; 35.98	41.00329; 67.01894; 77.03967; 129.03459; 145.02950	18.75; 8.33; 8.05; 10.58; 100.00
1046	149.01789	150.0251694	C7H6N2S	C1=CC=C2C(=C1)NC(=S)N2	105.04582; 149.01789	0.41; 100.00	105.04582; 149.01789	3.48; 100.00	105.04582; 149.01789	23.69; 100.00
1047	165.97907	166.9863415	C7H5NS2	C1=CC=C2C(=C1)NC(=S)S2	122.00699; 165.97906	0.60; 100.00	122.00699; 165.97906	1.12; 100.00	122.00699; 165.97906	10.16; 100.00
1048	212.0717	213.0789786	C13H11NO2	COC1=C(C=C2C(=C1)C3=CC=CC=C3O2)N	196.04040; 212.07170	4.96; 100.00	196.04040; 212.07170	40.36; 100.00	169.02950; 182.06114; 196.04040	31.66; 29.61; 100.00
1049	137.0608	138.0680796	C8H10O2	CC1=CC(=C(C=C1)O)OC	121.02950; 137.06080	8.08; 100.00	121.02950; 135.04515; 137.06080	57.03; 100.00; 36.38	41.00329; 55.01894; 65.00329; 67.01894; 69.03459; 121.02950; 135.04515	4.82; 7.99; 4.98; 6.33; 4.87; 29.83; 100.00
1050	165.0921	166.0993797	C10H14O2	CCCC1=CC(=C(C=C1)O)OC	133.06589; 165.09210	2.87; 100.00	105.03459; 121.02950; 137.06080; 149.06080; 165.09210	13.07; 26.39; 29.03; 10.65; 100.00	41.00329; 55.01894; 65.03967; 93.03459; 93.07097; 105.03459; 107.01385; 107.05024; 109.02950; 119.05024; 121.02950; 121.06589; 123.04515; 131.05024; 133.02950; 135.04515; 147.04515; 149.06080	29.36; 24.32; 69.60; 27.59; 23.83; 37.35; 67.53; 36.04; 32.91; 15.87; 100.00; 28.66; 96.62; 30.23; 47.58; 45.27; 28.76; 48.25
1051	136.07679	137.084064	C8H11NO	CC1=CC(=C(C=C1)OC)N	120.04549; 136.07679	11.97; 100.00	106.06622; 120.04549; 136.07679	19.81; 29.87; 100.00	40.01927; 64.01927; 65.03967; 66.03492; 106.06622; 120.04549	22.04; 96.12; 24.85; 100.00; 20.93; 99.03
1052	161.0608	162.0680796	C10H10O2	COC1=CC=CC=C1C=CC=O	133.06589; 161.06080	66.08; 100.00	41.00329; 55.01894; 101.03967; 103.05532; 113.00329; 117.03459; 131.05024; 133.06589	21.61; 11.82; 39.54; 24.12; 11.85; 100.00; 29.86; 23.51	63.02402; 77.03967; 87.02402; 89.00329; 93.03459; 101.03967; 103.05532; 113.00329; 117.03459	15.86; 7.82; 12.56; 12.99; 10.69; 13.20; 9.84; 7.95; 100.00
1053	75.04515	76.05242949	C3H8O2	COCCO	57.03459; 75.04515	23.26; 100.00	31.01894; 57.03459; 73.02950; 75.04515	25.93; 100.00; 79.09; 42.57	41.00329; 59.01385	85.64; 100.00
1054	142.05097	143.0582431	C6H9NO3	COCCOC(=O)CC#N	59.01385; 75.04515; 84.00910	100.00; 75.93; 47.33	57.03459; 59.01385; 65.99854; 73.02950; 84.00910	26.70; 15.65; 67.24; 13.82; 100.00	43.01894; 59.01385; 65.99854; 68.01419	16.92; 23.96; 100.00; 16.28
1055	123.04515	124.0524295	C7H8O2	CC1=C(C=CC=C1O)O	105.03459; 123.04515	1.89; 100.00	41.00329; 65.00329; 67.01894; 69.03459; 121.02950; 123.04515	5.44; 5.28; 5.90; 8.84; 7.30; 100.00	39.02402; 41.00329; 51.02402; 53.00329; 65.00329; 67.01894; 121.02950	11.76; 100.00; 12.60; 12.64; 28.85; 25.00; 10.89
1056	87.08154	88.088815	C5H12O	CCC(C)CO	57.07097; 87.08154	3.67; 100.00	57.07097; 87.08154	25.25; 100.00	41.03967; 57.03459; 57.07097; 87.08154	16.61; 17.22; 100.00; 9.69
1057	101.09719	102.1044651	C6H14O	CCCC(C)CO	71.05024; 101.09719	5.64; 100.00	71.08662; 83.08662; 99.08154; 101.09719	24.17; 100.00; 27.42; 78.07	41.03967; 43.05532; 55.05532; 57.03459; 59.05024; 71.05024; 71.08662; 101.09719	26.04; 10.99; 15.37; 34.17; 11.02; 10.36; 100.00; 17.92
1058	73.06589	74.07316494	C4H10O	CC(C)CO	71.05024; 73.06589	21.50; 100.00	71.05024; 73.06589	52.38; 100.00	55.05532; 57.03459; 73.06589	34.71; 91.22; 100.00
1059	117.0921	118.0993797	C6H14O2	CC(CC(C)(C)O)O	81.07097; 99.08154; 117.09210	15.94; 56.49; 100.00	43.01894; 57.03459	29.71; 100.00	41.00329; 43.01894; 57.03459; 59.05024; 73.06589; 99.08154	16.32; 43.19; 100.00; 14.79; 14.79; 12.22
1060	87.08154	88.088815	C5H12O	CCC(C)(C)O	59.05024; 87.08154	3.16; 100.00	57.03459; 87.08154	39.18; 100.00	43.01894; 57.03459; 71.05024; 87.08154	22.17; 70.86; 57.65; 100.00
1061	83.05024	84.05751487	C5H8O	CC=C(C)C=O	65.03967; 83.05024	8.35; 100.00	51.02402; 65.03967; 83.05024	52.12; 26.48; 100.00	49.00837; 51.02402; 65.03967	25.19; 25.67; 100.00
1062	80.05057	81.05784923	C5H7N	CC=C(C)C#N	54.03492; 80.05057	0.54; 100.00	49.00837; 80.05057	20.30; 100.00	49.00837; 51.02402; 52.01927; 54.03492; 80.05057	48.17; 58.25; 48.61; 100.00; 30.75
1063	83.05024	84.05751487	C5H8O	CC(C)(C#C)O	65.03967; 83.05024	16.18; 100.00	65.03967; 83.05024	58.79; 100.00	49.00837; 65.03967	100.00; 67.25
1064	113.00666	114.013936	C5H6OS	CC1=C(C=CO1)S	41.00329; 56.98044; 70.99609; 113.00666	40.55; 55.30; 59.78; 100.00	41.00329; 70.99609; 110.99101; 113.00666	28.82; 51.26; 20.55; 100.00	41.00329; 43.01894; 56.98044; 65.00329; 68.98044; 70.99609	100.00; 40.19; 27.81; 23.82; 53.92; 42.39
1065	278.12202	279.1293001	C15H21NO2S	CC(C)(C(=O)C1=CC=C(C=C1)SC)N2CCOCC2	191.05361; 278.12202	72.27; 100.00	46.99609; 145.06589; 147.08154; 151.02231; 191.05361; 193.06926; 230.11865; 232.13430; 278.12202	24.04; 14.27; 5.46; 14.47; 10.85; 6.39; 12.03; 20.02; 100.00	43.01894; 46.99609; 82.02984; 123.02739; 126.09244; 131.05024; 134.99101; 137.00666; 145.06589; 147.08154; 151.02231; 175.02231; 177.03796; 179.05361; 191.05361; 193.06926; 216.10300; 218.10089; 220.08016; 244.08016; 246.09581; 248.11146; 250.12711; 252.10637; 262.09072; 278.12202	11.79; 100.00; 25.91; 61.11; 13.50; 13.35; 80.19; 41.92; 64.05; 23.68; 36.44; 20.80; 44.13; 21.23; 15.62; 16.43; 19.72; 12.29; 32.30; 14.03; 11.19; 19.52; 14.38; 14.03; 14.54; 12.50
1066	139.06253	140.0698109	C5H8N4O	CC1=NC(=NC(=N1)OC)N	41.01452; 139.06253	1.64; 100.00	40.01927; 41.01452; 109.05197; 139.06253	15.67; 17.90; 22.58; 100.00	40.01927; 41.01452	100.00; 71.69
1067	160.0404	161.0476785	C9H7NO2	CC1=NC2=CC=CC=C2C(=O)O1	118.02984; 160.04040	6.36; 100.00	116.05057; 160.04040	16.65; 100.00	90.03492; 92.01419; 92.05057; 110.02475; 116.05057; 118.02984; 134.02475; 160.04040	15.07; 49.30; 100.00; 26.50; 60.34; 76.50; 22.22; 35.33
1068	195.06628	196.0735589	C10H12O4	CC1=C(C(=O)C=CO1)OC(=O)C(C)C	125.02442; 195.06628	16.09; 100.00	41.00329; 43.01894; 55.01894; 69.03459; 83.01385; 99.04515; 109.02950; 123.00877; 125.02442; 141.05572; 153.05572; 179.03498; 193.05063; 195.06628	29.02; 12.02; 9.60; 25.66; 14.10; 19.99; 44.34; 26.43; 53.13; 21.84; 13.15; 13.56; 10.24; 100.00	41.00329; 43.01894; 53.00329; 55.01894; 65.00329; 67.01894; 68.99820; 71.01385; 80.99820; 83.01385; 109.02950; 125.02442	100.00; 32.76; 18.30; 59.97; 34.61; 56.93; 17.24; 58.37; 14.35; 13.83; 25.44; 43.15
1069	163.11284	164.1201151	C11H16O	CC(C)(CCC1=CC=CC=C1)O	145.10227; 163.11284	100.00; 96.94	105.07097; 145.10227; 163.11284	12.70; 16.85; 100.00	43.01894; 57.03459; 59.05024; 67.05532; 77.03967; 105.07097; 129.07097; 143.08662; 145.10227	28.39; 9.79; 8.76; 11.76; 100.00; 12.94; 28.55; 15.03; 28.93
1070	159.08491	160.0921863	C8H16OS	CCCC1CCOC(S1)C	43.05532; 159.08491	14.55; 100.00	43.01894; 58.99609; 61.01174; 74.99101; 77.00666; 115.05869; 131.05361; 157.06926; 159.08491	21.32; 100.00; 17.03; 40.74; 19.40; 35.33; 10.18; 14.44; 91.68	43.01894; 56.98044; 58.99609; 61.01174; 74.99101; 77.00666; 115.05869; 141.03796; 143.05361; 157.06926	16.74; 8.67; 100.00; 7.60; 31.54; 14.52; 5.11; 6.42; 8.37; 7.58
1071	195.13905	196.1463299	C12H20O2	CC(=O)OC(C)(C)CCCC(=C)C=C	109.10227; 135.11792	26.35; 100.00	59.01385; 119.08662; 133.10227; 135.11792; 195.13905	55.38; 19.11; 72.92; 100.00; 23.23	41.00329; 59.01385; 101.09719; 127.11284; 153.12849	36.23; 100.00; 10.25; 10.00; 5.46
1072	106.06622	107.0734993	C7H9N	CC1=CC=CC=C1N	80.05057; 106.06622	0.51; 100.00	104.05057; 106.06622	10.24; 100.00	40.01927; 49.00837; 50.00362; 51.02402; 52.01927; 63.02402; 64.01927; 66.03492; 104.05057; 106.06622	24.60; 24.08; 14.76; 16.20; 14.71; 29.05; 23.78; 25.64; 17.17; 100.00
1073	221.0608	222.0680796	C15H10O2	CC1=CC2=C(C=C1)C(=O)C3=CC=CC=C3C2=O	195.04515; 221.06080	0.02; 100.00	195.04515; 221.06080	0.37; 100.00	195.04515; 221.06080	36.97; 100.00
1074	134.06114	135.0684139	C8H9NO	CC1=CC=CC=C1C(=O)N	91.05532; 134.06114	100.00; 87.15	91.05532; 134.06114	100.00; 7.85	41.99854; 91.05532	100.00; 11.25
1075	123.0274	124.0346714	C7H8S	CC1=CC=CC=C1S	97.01174; 123.02739	1.47; 100.00	121.01174; 123.02739	5.97; 100.00	32.98044; 56.98044; 63.02402; 65.03967; 68.98044; 80.98044; 82.99609; 123.02739	24.45; 46.42; 13.13; 24.69; 14.92; 40.56; 16.05; 100.00
1076	135.04515	136.0524295	C8H8O2	CC1=CC=CC=C1C(=O)O	91.05532; 135.04515	100.00; 13.01	91.05532; 135.04515	100.00; 2.89	65.03967; 91.05532	16.92; 100.00
1077	148.02264	149.0299204	C8H7NS	CC1=NC2=CC=CC=C2S1	98.00699; 148.02264	3.55; 100.00	122.00699; 148.02264	5.13; 100.00	122.00699; 148.02264	46.01; 100.00
1078	85.06589	86.07316494	C5H10O	CCC(C)C=O	57.03459; 85.06589	6.37; 100.00	57.03459; 57.07097; 85.06589	19.17; 12.62; 100.00	41.00329; 57.03459; 57.07097	61.48; 40.36; 100.00
1079	101.0608	102.0680796	C5H10O2	CCC(C)C(=O)O	73.02950; 101.06080	4.73; 100.00	57.07097; 101.06080	15.27; 100.00	44.99820; 57.03459; 57.07097; 65.03967	45.28; 15.75; 100.00; 12.00
1080	129.0921	130.0993797	C7H14O2	CCC(C)COC(=O)C	59.01385; 87.08154	100.00; 29.58	41.00329; 59.01385	7.40; 100.00	41.00329; 59.01385	52.81; 100.00
1081	171.13905	172.1463299	C10H20O2	CCC(C)COC(=O)CC(C)C	83.05024; 171.13905	100.00; 55.20	83.05024; 85.06589; 87.08154; 99.04515; 101.06080	100.00; 14.28; 24.15; 25.95; 91.13	41.00329; 57.07097; 67.01894; 83.05024; 87.08154	100.00; 28.66; 84.07; 50.26; 13.23
1082	145.06589	146.0731649	C10H10O	CC(=CC1=CC=CC=C1)C=O	91.05532; 145.06589	25.90; 100.00	91.05532; 117.07097	19.52; 100.00	77.03967; 91.05532; 115.05532; 117.07097	58.85; 100.00; 61.73; 30.92
1083	105.04582	106.0530982	C6H6N2	C=C(CCC#N)C#N	89.01452; 105.04582	7.94; 100.00	74.00362; 105.04582	100.00; 90.06	49.00837; 50.00362; 54.03492; 74.00362; 76.01927; 78.03492	80.17; 100.00; 77.89; 65.56; 76.92; 69.50
1084	81.03459	82.04186481	C5H6O	CC1=CC=CO1	63.02402; 81.03459	32.20; 100.00	63.02402; 81.03459	68.53; 100.00	63.02402; 65.00329	100.00; 6.41
1085	129.0921	130.0993797	C7H14O2	CCCCC(C)C(=O)O	85.10227; 129.09210	1.92; 100.00	83.08662; 85.10227; 129.09210	14.98; 19.20; 100.00	44.99820; 53.03967; 57.03459; 57.07097; 67.05532; 71.01385; 73.02950; 85.02950; 85.10227; 129.09210	100.00; 9.93; 10.39; 18.95; 6.08; 16.10; 7.92; 10.34; 9.67; 6.69
1086	81.04582	82.0530982	C4H6N2	CC1=NC=CN1	40.01927; 81.04582	3.66; 100.00	40.01927; 55.03017; 81.04582	19.44; 100.00; 27.08	40.01927; 64.01927	100.00; 56.63
1087	141.07097	142.0782503	C11H10	CC1=CC2=CC=CC=C2C=C1	115.05532; 141.07097	0.13; 100.00	125.03967; 141.07097	1.96; 100.00	115.05532; 141.07097	25.12; 100.00
1088	85.10227	86.10955045	C6H14	CCCC(C)C	83.08662; 85.10227	3.84; 100.00	83.08662; 85.10227	32.68; 100.00	83.08662; 85.10227	16.09; 100.00
1089	115.12407	116.1313485	C6H16N2	CC(CCCN)CN	113.10842; 115.12407	5.04; 100.00	113.10842; 115.12407	100.00; 39.57	40.01927; 42.03492; 54.03492; 97.07712; 99.09277; 111.09277; 113.10842	14.29; 100.00; 10.18; 57.61; 15.14; 15.74; 65.95
1090	107.06147	108.0687483	C6H8N2	CC(CCC#N)C#N	90.03492; 107.06147	6.33; 100.00	74.00362; 76.01927; 90.03492; 107.06147	26.37; 40.72; 100.00; 54.28	40.01927; 49.00837; 50.00362; 52.01927; 54.03492; 64.01927; 66.03492; 76.01927; 78.03492; 105.04582	79.75; 28.70; 100.00; 27.52; 51.02; 22.95; 41.43; 39.42; 24.64; 24.99
1091	145.05063	146.0579088	C6H10O4	CC(CCC(=O)O)C(=O)O	101.06080; 145.05063	93.44; 100.00	73.02950; 81.03459; 83.05024; 99.04515; 101.06080; 145.05063	19.34; 17.74; 100.00; 34.65; 69.18; 31.42	41.00329; 44.99820; 53.03967; 57.03459; 57.07097; 59.01385; 71.01385; 73.02950; 81.03459; 83.05024; 99.04515	32.34; 23.93; 19.39; 15.86; 19.33; 51.66; 15.72; 29.81; 100.00; 58.98; 16.92
1092	115.07645	116.0837296	C6H12O2	CCCC(C)C(=O)O	71.08662; 115.07645	3.34; 100.00	71.08662; 115.07645	11.94; 100.00	44.99820; 71.08662	100.00; 9.45
1093	191.08662	192.0939004	C15H12	CC1=CC2=C(C=C1)C3=CC=CC=C3C=C2	165.07097; 191.08662	0.05; 100.00	165.07097; 191.08662	0.68; 100.00	165.07097; 191.08662	28.87; 100.00
1094	135.08154	136.088815	C9H12O	CC1=CC=CC=C1CCO	105.07097; 135.08154	100.00; 49.41	105.07097; 117.07097; 135.08154	34.47; 100.00; 17.08	65.03967; 91.05532; 101.03967; 105.07097; 115.05532; 117.07097	9.50; 97.78; 30.55; 11.63; 28.42; 100.00
1095	71.05024	72.05751487	C4H8O	CC(C)C=O	69.03459; 71.05024	1.10; 100.00	55.01894; 71.05024	18.19; 100.00	53.00329; 55.01894	9.18; 100.00
1096	89.0608	90.06807956	C4H10O2	CC(CO)CO	59.05024; 89.06080	98.35; 100.00	55.01894; 57.03459; 59.05024; 71.05024	31.75; 97.57; 100.00; 42.88	41.03967; 43.01894; 59.05024	100.00; 75.05; 33.29
1097	68.05057	69.05784923	C4H7N	CC(C)C#N	66.03492; 68.05057	0.93; 100.00	66.03492; 68.05057	19.36; 100.00	66.03492; 68.05057	100.00; 92.73
1098	87.04515	88.05242949	C4H8O2	CC(C)C(=O)O	69.03459; 87.04515	1.19; 100.00	85.02950; 87.04515	5.04; 100.00	43.05532; 71.01385; 87.04515	100.00; 75.86; 88.90
1099	92.05057	93.05784923	C6H7N	CC1=CC=CC=N1	40.01927; 92.05057	0.59; 100.00	40.01927; 92.05057	6.95; 100.00	40.01927; 64.01927; 66.03492	100.00; 59.71; 48.62
1100	85.06589	86.07316494	C5H10O	CC1CCCO1	57.03459; 85.06589	13.59; 100.00	43.01894; 57.03459; 67.05532; 69.03459; 85.06589	17.69; 11.12; 22.45; 13.19; 100.00	41.03967; 43.01894; 51.02402; 57.03459; 67.05532; 69.03459; 85.06589	57.44; 76.10; 73.22; 57.65; 59.94; 97.98; 100.00
1101	99.04515	100.0524295	C5H8O2	CC1C(=O)CCO1	43.01894; 55.01894; 71.01385; 99.04515	29.92; 25.45; 28.65; 100.00	43.01894; 55.01894	100.00; 67.77	43.01894; 55.01894; 57.03459	56.75; 100.00; 45.04
1102	183.17544	184.1827154	C12H24O	CCCCCCCCCC(C)C=O	155.18052; 183.17544	27.30; 100.00	55.01894; 153.16487; 155.18052; 183.17544	9.31; 7.56; 14.75; 100.00	51.02402; 53.00329; 53.03967; 55.01894; 57.03459; 57.07097; 59.05024; 65.03967; 67.05532; 69.03459; 71.08662; 93.07097; 97.10227; 99.11792; 109.06589; 111.08154; 111.11792; 113.09719; 121.10227; 125.09719; 125.13357; 127.14922; 139.11284; 167.14414; 183.17544	10.90; 14.45; 12.56; 84.31; 100.00; 21.00; 13.03; 19.30; 38.16; 22.76; 35.31; 16.10; 24.04; 18.23; 9.70; 10.99; 11.91; 10.89; 12.38; 19.13; 13.69; 25.39; 12.93; 10.27; 30.67
1103	143.05024	144.0575149	C10H8O	C1=CC=C2C=C(C=CC2=C1)O	115.05532; 143.05024	0.28; 100.00	115.05532; 143.05024	23.69; 100.00	115.05532; 143.05024	100.00; 56.34
1104	201.05572	202.0629942	C12H10O3	C1=CC=C2C=C(C=CC2=C1)OCC(=O)O	157.06589; 201.05572	13.86; 100.00	157.06589; 201.05572	100.00; 81.20	127.05532; 157.06589	100.00; 16.41
1105	142.06622	143.0734993	C10H9N	C1=CC=C2C=C(C=CC2=C1)N	115.05532; 142.06622	0.27; 100.00	115.05532; 142.06622	6.61; 100.00	115.05532; 142.06622	35.39; 100.00
1106	172.17069	173.1779644	C10H23NO	CCCCN(CCCC)CCO	128.14447; 172.17069	11.03; 100.00	43.01894; 126.12882; 128.14447; 140.14447; 142.16012; 154.16012; 172.17069	15.90; 100.00; 95.66; 20.71; 36.73; 31.63; 96.04	43.01894; 43.05532; 45.03459; 58.02984; 60.04549; 68.05057; 70.06622; 72.08187; 98.09752; 100.11317; 126.12882	100.00; 13.39; 23.98; 49.12; 54.62; 13.89; 18.06; 33.92; 16.52; 17.32; 12.84
1107	120.04549	121.0527638	C7H7NO	CC1=CC=CC=C1N=O	94.02984; 120.04549	0.13; 100.00	73.00837; 120.04549	6.48; 100.00	49.00837; 56.01419; 63.02402; 65.03967; 74.00362; 92.01419; 120.04549	100.00; 12.54; 35.87; 20.71; 24.99; 17.25; 12.35
1108	163.04007	164.0473441	C9H8O3	C1C2C=CC1C3C2C(=O)OC3=O	119.05024; 163.04007	19.23; 100.00	119.05024; 163.04007	7.31; 100.00	65.03967; 89.03967; 91.05532; 117.03459; 161.02442; 163.04007	100.00; 65.54; 59.65; 77.73; 53.77; 64.20
1109	129.12849	130.1357652	C8H18O	CCCCCCC(C)O	111.11792; 129.12849	2.86; 100.00	43.01894; 109.10227; 111.11792; 113.09719; 127.11284; 129.12849	20.76; 19.81; 26.68; 15.12; 91.55; 100.00	39.02402; 41.00329; 43.01894; 53.03967; 57.03459; 57.07097; 59.05024; 67.05532; 81.07097; 111.11792; 129.12849	14.75; 11.94; 93.58; 10.20; 100.00; 17.16; 11.81; 10.03; 8.50; 7.85; 8.07
1110	209.11832	210.1255944	C12H18O3	CCCCCC=CCC1CC(=O)OC1=O	165.12849; 209.11832	5.62; 100.00	41.00329; 59.01385; 61.02950; 96.99312; 99.00877; 111.11792; 137.13357; 149.09719; 163.11284; 165.12849; 181.12340; 191.10775; 209.11832	5.96; 8.86; 6.27; 6.86; 5.45; 8.30; 3.91; 6.24; 5.41; 35.66; 11.38; 8.88; 100.00	41.00329; 43.01894; 44.99820; 51.02402; 55.01894; 59.01385; 65.03967; 67.05532; 69.03459; 69.07097; 71.01385; 83.05024; 85.02950; 93.03459; 93.07097; 95.01385; 95.05024; 97.02950; 111.04515; 113.02442; 121.10227; 123.00877; 123.04515; 123.11792; 125.06080; 137.02442; 137.13357; 139.04007; 159.10267; 165.12849; 181.12340	100.00; 7.64; 4.85; 16.74; 7.03; 20.27; 21.50; 6.14; 5.58; 9.22; 9.96; 4.96; 5.57; 6.40; 5.00; 9.75; 4.60; 7.06; 5.18; 6.07; 7.01; 5.52; 6.65; 5.94; 4.64; 20.94; 5.15; 5.28; 4.61; 12.09; 7.51
1111	125.09719	126.1044651	C8H14O	CCCCC(=O)C=CC	41.03967; 125.09719	13.81; 100.00	41.03967; 67.01894; 81.03459; 83.05024; 85.06589; 107.08662; 125.09719	49.45; 53.43; 23.94; 65.77; 45.93; 26.72; 100.00	41.00329; 49.00837; 51.02402; 53.03967; 63.02402; 65.03967; 67.01894; 67.05532; 69.03459; 77.03967; 79.05532; 81.07097; 83.05024; 93.03459; 95.05024	20.62; 21.30; 47.15; 15.66; 30.52; 100.00; 44.53; 15.29; 54.75; 19.68; 13.57; 16.71; 40.11; 14.59; 20.49
1112	297.31629	298.323566	C20H42O	CCCCCCCCCCC(CCCCCCCC)CO	295.30064; 297.31629	8.51; 100.00	267.30572; 279.30572; 297.31629	28.45; 22.11; 100.00	57.07097; 71.08662; 115.11284; 125.09719; 127.14922; 129.12849; 169.15979; 171.17544; 183.17544; 185.19109; 195.21182; 197.19109; 197.22747; 199.20674; 209.22747; 211.20674; 211.24312; 213.22239; 223.24312; 225.22239; 227.23804; 237.25877; 239.23804; 241.25369; 253.25369; 255.26934; 265.29007; 267.26934; 267.30572; 279.30572; 297.31629	26.50; 20.25; 26.35; 21.39; 24.04; 42.25; 33.66; 23.84; 42.66; 31.47; 39.68; 37.27; 25.00; 29.98; 28.07; 47.60; 21.18; 24.08; 38.86; 59.55; 31.94; 24.87; 51.24; 39.11; 63.27; 31.82; 39.85; 27.18; 24.82; 31.36; 100.00
1113	141.06695	142.0742276	C6H10N2O2	C1CC(=O)N(C1)CC(=O)N	41.99854; 141.06695	100.00; 59.49	41.99854; 44.01419	100.00; 13.38	41.00329; 41.99854	0.60; 100.00
1114	130.9986	132.0058732	C4H4O5	C(C(=O)C(=O)O)C(=O)O	87.00877; 130.99860	100.00; 37.31	41.00329; 68.99820; 87.00877	100.00; 59.65; 80.49	41.00329; 44.99820; 68.99820	100.00; 56.21; 70.79
1115	115.04007	116.0473441	C5H8O3	CCCC(=O)C(=O)O	71.05024; 115.04007	8.08; 100.00	43.01894; 69.03459; 71.05024; 97.02950; 115.04007	18.92; 100.00; 61.91; 18.87; 24.22	41.00329; 44.99820; 51.02402; 69.03459	100.00; 79.06; 43.95; 40.29
1116	85.06589	86.07316494	C5H10O	CCCC(=O)C	57.03459; 85.06589	5.54; 100.00	41.00329; 57.03459; 85.06589	50.61; 39.27; 100.00	41.00329; 57.03459	50.48; 100.00
1117	151.11284	152.1201151	C10H16O	CCCCCC1=CCCC1=O	133.10227; 151.11284	9.20; 100.00	133.10227; 151.11284	7.87; 100.00	41.00329; 49.00837; 51.02402; 63.02402; 65.03967; 67.05532; 79.01894; 79.05532; 81.03459; 81.07097; 89.03967; 91.05532; 93.03459; 93.07097; 95.05024; 97.10227; 103.05532; 105.03459; 107.05024; 109.06589; 117.07097; 121.06589; 123.08154; 135.08154; 151.11284	50.23; 25.13; 21.86; 15.32; 45.72; 26.29; 72.07; 24.40; 29.99; 17.28; 49.85; 29.70; 100.00; 22.63; 78.63; 15.37; 18.22; 18.15; 28.92; 17.08; 18.44; 39.52; 17.97; 22.21; 21.14
1118	137.09719	138.1044651	C9H14O	CCCCCC1=CC=CO1	81.03459; 137.09719	2.15; 100.00	67.01894; 81.03459; 89.03967; 93.07097; 103.05532; 105.07097; 107.08662; 109.10227; 119.08662; 137.09719	20.33; 6.10; 6.55; 9.31; 5.95; 19.76; 14.13; 18.92; 10.09; 100.00	41.00329; 49.00837; 51.02402; 55.01894; 63.02402; 65.00329; 65.03967; 67.01894; 67.05532; 81.03459; 89.03967; 93.03459; 93.07097; 95.05024	10.42; 29.41; 13.45; 11.65; 46.80; 9.07; 35.19; 68.20; 23.17; 100.00; 12.21; 13.26; 14.04; 19.70
1119	137.0608	138.0680796	C8H10O2	C1=CC=C(C=C1)OCCO	43.01894; 93.03459	16.88; 100.00	65.03967; 93.03459	2.59; 100.00	65.03967; 93.03459	4.51; 100.00
1120	191.07137	192.0786442	C11H12O3	C=CC(=O)OCCOC1=CC=CC=C1	71.01385; 93.03459	100.00; 65.39	71.01385; 93.03459	75.33; 100.00	71.01385; 93.03459	53.26; 100.00
1121	207.10267	208.1099444	C12H16O3	CC(C)C(=O)OCCOC1=CC=CC=C1	87.04515; 93.03459	100.00; 18.02	87.04515; 93.03459	72.01; 100.00	43.05532; 71.01385; 93.03459	35.21; 100.00; 30.63
1122	175.11284	176.1201151	C12H16O	C1CCC(C(C1)C2=CC=CC=C2)O	77.03967; 157.10227	66.38; 100.00	77.03967; 157.10227; 175.11284	26.03; 56.57; 100.00	77.03967; 81.07097; 91.05532; 107.05024; 117.03459; 119.05024; 157.10227; 173.09719	100.00; 3.09; 10.48; 2.76; 3.41; 4.46; 3.42; 6.57
1123	205.1234	206.1306798	C13H18O2	CCC(C)C(=O)OCCC1=CC=CC=C1	73.02950; 101.06080; 105.07097; 205.12340	23.31; 100.00; 12.95; 68.25	57.07097; 71.01385; 73.02950; 77.03967; 91.05532; 101.06080; 103.05532	16.83; 12.17; 22.40; 53.17; 94.23; 100.00; 30.23	44.99820; 51.02402; 57.03459; 57.07097; 65.03967; 71.01385; 73.02950; 85.02950; 91.05532	15.16; 14.49; 16.74; 100.00; 17.11; 31.24; 16.18; 22.15; 15.40
1124	191.10775	192.1150297	C12H16O2	CC(C)C(=O)OCCC1=CC=CC=C1	87.04515; 191.10775	100.00; 11.12	71.01385; 77.03967; 87.04515	55.83; 25.11; 100.00	43.05532; 71.01385; 91.05532	34.71; 100.00; 33.73
1125	163.07645	164.0837296	C10H12O2	CC(=O)OCCC1=CC=CC=C1	59.01385; 163.07645	100.00; 2.47	59.01385; 91.05532	100.00; 19.90	41.00329; 59.01385	100.00; 97.42
1126	225.0921	226.0993797	C15H14O2	C1=CC=C(C=C1)CCOC(=O)C2=CC=CC=C2	121.02950; 225.09210	12.07; 100.00	77.03967; 121.02950	100.00; 52.37	77.03967; 91.05532	100.00; 6.48
1127	191.10775	192.1150297	C12H16O2	CCCC(=O)OCCC1=CC=CC=C1	87.04515; 191.10775	100.00; 60.40	59.01385; 69.03459; 77.03967; 87.04515; 91.05532; 103.05532	29.42; 42.32; 26.59; 88.42; 100.00; 20.54	41.00329; 51.02402; 67.01894; 69.03459; 91.05532	100.00; 44.81; 42.91; 47.65; 36.03
1128	219.13905	220.1463299	C14H20O2	CCCCCC(=O)OCCC1=CC=CC=C1	97.06589; 115.07645	100.00; 13.12	43.01894; 59.01385; 77.03967; 79.05532; 91.05532; 97.06589; 103.05532; 115.07645	21.34; 13.51; 26.36; 62.78; 87.11; 100.00; 16.65; 45.15	41.00329; 55.01894; 57.03459; 59.01385; 71.01385; 71.05024; 77.03967; 79.05532; 85.02950; 87.04515; 91.05532; 97.06589; 99.04515	38.63; 31.88; 100.00; 17.74; 23.61; 25.86; 14.49; 34.81; 23.01; 14.75; 39.38; 27.61; 58.56
1129	239.10775	240.1150297	C16H16O2	C1=CC=C(C=C1)CCOC(=O)CC2=CC=CC=C2	91.05532; 239.10775	20.81; 100.00	59.01385; 91.05532; 103.05532; 121.06589; 135.04515; 239.10775	9.75; 100.00; 8.68; 12.86; 10.93; 26.31	41.00329; 77.03967; 91.05532; 103.05532	8.95; 24.38; 100.00; 5.40
1130	177.0921	178.0993797	C11H14O2	CCC(=O)OCCC1=CC=CC=C1	73.02950; 77.03967	100.00; 2.54	73.02950; 77.03967; 91.05532	100.00; 20.81; 44.33	55.01894; 71.01385; 73.02950	72.37; 45.00; 100.00
1131	153.03796	154.0452361	C8H10OS	C1=CC=C(C=C1)SCCO	44.98044; 109.01174; 153.03796	100.00; 58.12; 49.09	44.98044; 109.01174	2.22; 100.00	72.97536; 109.01174	5.97; 100.00
1132	169.06589	170.0731649	C12H10O	C1=CC=C(C=C1)C2=CC=CC=C2O	119.05024; 169.06589	0.17; 100.00	117.03459; 169.06589	2.14; 100.00	91.01894; 101.03967; 115.05532; 117.03459; 119.05024; 139.05532; 141.03459; 143.05024; 153.03459; 169.06589	100.00; 28.90; 36.01; 84.08; 39.16; 29.21; 29.93; 27.77; 22.95; 66.38
1133	135.08154	136.088815	C9H12O	CC(CO)C1=CC=CC=C1	77.03967; 117.07097	42.25; 100.00	77.03967; 117.07097	100.00; 61.84	63.02402; 65.03967; 77.03967; 103.05532; 105.07097	19.00; 6.76; 100.00; 4.26; 8.00
1134	135.08154	136.088815	C9H12O	CC(C)(C1=CC=CC=C1)O	117.07097; 135.08154	29.53; 100.00	77.03967; 117.07097; 135.08154	43.61; 63.72; 100.00	39.02402; 77.03967; 117.07097	11.58; 100.00; 15.63
1135	128.10809	129.1153641	C7H15NO	C1CCNC(C1)CCO	110.09752; 128.10809	21.85; 100.00	98.09752; 108.08187; 110.09752; 128.10809	22.65; 45.67; 100.00; 34.90	28.01927; 41.03967; 42.03492; 43.01894; 43.05532; 45.03459; 82.06622; 94.06622; 96.08187; 97.06589; 99.08154; 108.08187; 110.09752; 126.09244; 128.10809	9.56; 8.62; 23.14; 25.71; 8.43; 6.86; 27.12; 11.52; 6.68; 12.16; 6.48; 4.66; 5.04; 100.00; 4.61
1136	103.07645	104.0837296	C5H12O2	CCCOCCO	59.05024; 103.07645	100.00; 32.41	43.01894; 57.03459; 59.01385; 59.05024; 101.06080	30.28; 37.58; 32.64; 100.00; 18.94	41.00329; 59.01385	53.98; 100.00
1137	157.15979	158.1670653	C10H22O	CCCCCC(CCC)CO	127.14922; 157.15979	15.73; 100.00	125.13357; 127.14922; 139.14922; 155.14414; 157.15979	27.49; 30.75; 27.42; 22.75; 100.00	53.03967; 55.01894; 55.05532; 57.07097; 59.05024; 67.05532; 69.07097; 71.08662; 85.06589; 85.10227; 95.08662; 97.06589; 97.10227; 99.08154; 99.11792; 101.09719; 111.11792; 113.09719; 123.11792; 125.13357; 127.11284; 127.14922; 157.15979	17.23; 26.91; 17.48; 28.42; 57.79; 92.59; 26.92; 100.00; 59.89; 18.28; 43.91; 25.81; 20.68; 19.08; 52.23; 17.79; 19.10; 39.68; 39.50; 20.04; 31.29; 42.81; 23.29
1138	135.08154	136.088815	C9H12O	CCCC1=CC=CC=C1O	107.05024; 135.08154	6.71; 100.00	107.05024; 117.07097; 135.08154	47.02; 7.33; 100.00	41.00329; 49.00837; 51.02402; 63.02402; 65.03967; 77.03967; 79.05532; 91.05532; 93.03459; 105.03459; 107.05024; 117.03459; 119.05024; 133.06589	17.73; 7.07; 9.04; 9.52; 26.20; 27.44; 7.25; 6.95; 36.87; 6.87; 100.00; 9.43; 19.86; 11.06
1139	103.03017	104.0374481	C6H4N2	C1=CC=NC(=C1)C#N	77.01452; 103.03017	0.74; 100.00	50.00362; 103.03017	6.77; 100.00	49.00837; 74.00362; 76.01927; 77.01452; 101.01452	40.10; 44.95; 60.41; 100.00; 45.98
1140	84.04549	85.05276385	C4H7NO	C1CC(=O)NC1	41.99854; 84.04549	15.96; 100.00	41.99854; 66.03492; 84.04549	17.04; 31.23; 100.00	41.99854; 66.03492	100.00; 34.62
1141	153.12849	154.1357652	C10H18O	CCC(C)C1CCCCC1=O	135.11792; 153.12849	5.99; 100.00	135.11792; 153.12849	4.13; 100.00	41.00329; 41.03967; 53.03967; 55.01894; 57.03459; 57.07097; 67.01894; 69.03459; 93.03459; 95.05024; 97.06589; 99.11792; 107.05024; 109.06589; 121.10227; 123.08154; 125.09719; 135.11792; 151.11284; 153.12849	53.42; 15.22; 11.18; 12.51; 11.40; 94.29; 11.10; 11.27; 14.75; 100.00; 26.82; 9.18; 20.61; 44.73; 10.66; 33.74; 29.44; 9.49; 17.83; 22.97
1142	177.12849	178.1357652	C12H18O	CCC1=CC(=C(C=C1)O)C(C)(C)C	125.09719; 177.12849	0.56; 100.00	161.09719; 177.12849	3.66; 100.00	93.03459; 97.06589; 105.03459; 119.05024; 133.10227; 145.06589; 149.09719; 161.09719; 175.11284; 177.12849	17.99; 11.26; 49.58; 4.32; 5.04; 10.71; 32.12; 100.00; 10.43; 19.03
1143	179.10775	180.1150297	C11H16O2	CC(C)(C)C1=C(C=CC(=C1)OC)O	163.07645; 179.10775	2.68; 100.00	81.07097; 83.08662; 135.08154; 163.07645; 179.10775	8.75; 18.80; 9.59; 28.64; 100.00	55.05532; 107.01385; 109.06589; 111.08154; 163.07645	8.51; 83.11; 11.97; 15.19; 100.00
1144	163.11284	164.1201151	C11H16O	CC1=CC(=C(C=C1)C(C)(C)C)O	135.11792; 163.11284	0.84; 100.00	135.11792; 163.11284	5.02; 100.00	79.05532; 95.08662; 107.05024; 121.06589; 123.08154; 131.05024; 163.11284	10.91; 13.78; 100.00; 24.14; 19.86; 10.81; 64.66
1145	163.11284	164.1201151	C11H16O	CC1=C(C(=CC=C1)C(C)(C)C)O	131.08662; 163.11284	0.41; 100.00	135.11792; 163.11284	5.98; 100.00	57.07097; 63.02402; 65.03967; 91.05532; 95.08662; 105.03459; 105.07097; 107.05024; 107.08662; 121.06589; 123.08154; 131.05024; 147.08154; 163.11284	12.16; 14.62; 12.74; 11.69; 14.38; 58.78; 18.98; 70.83; 40.94; 12.67; 14.36; 45.54; 100.00; 80.58
1146	155.14414	156.1514153	C10H20O	CC(C)(C)C1CCCCC1O	137.13357; 155.14414	0.71; 100.00	137.13357; 155.14414	7.20; 100.00	79.05532; 97.06589; 121.10227; 137.13357; 153.12849; 155.14414	8.42; 7.88; 17.01; 85.29; 24.55; 100.00
1147	153.12849	154.1357652	C10H18O	CC(C)(C)C1CCCCC1=O	57.07097; 153.12849	1.66; 100.00	135.11792; 153.12849	4.94; 100.00	41.00329; 55.05532; 57.07097; 71.08662; 81.03459; 95.05024; 97.06589; 99.11792; 111.11792; 119.08662; 135.11792; 137.09719; 151.11284; 153.12849	53.66; 11.93; 89.79; 14.88; 12.96; 73.16; 44.84; 51.78; 20.49; 19.76; 44.82; 25.01; 48.07; 100.00
1148	197.1547	198.1619799	C12H22O2	CC(=O)OC1CCCCC1C(C)(C)C	59.01385; 197.15470	25.95; 100.00	59.01385; 135.11792; 137.13357; 155.14414; 197.15470	100.00; 25.11; 38.37; 95.52; 53.71	41.00329; 43.01894; 57.07097; 59.01385; 71.08662; 95.08662; 97.10227; 99.11792	44.06; 4.52; 5.08; 100.00; 8.93; 4.41; 3.53; 5.84
1149	149.09719	150.1044651	C10H14O	CC(C)(C)C1=CC=CC=C1O	133.06589; 149.09719	0.27; 100.00	93.03459; 149.09719	3.77; 100.00	41.00329; 65.00329; 67.01894; 93.03459; 95.08662; 97.06589; 105.07097; 107.08662; 117.03459; 133.06589; 149.09719	100.00; 21.69; 15.92; 73.31; 20.57; 17.13; 28.18; 19.22; 19.44; 27.43; 68.69
1150	228.92796	229.9352349	C8H6S4	C1=CSC(=C1)SSC2=CC=CS2	82.99609; 228.92796	1.21; 100.00	82.99609; 228.92796	14.56; 100.00	82.99609; 228.92796	100.00; 10.82
1151	153.00157	154.0088506	C7H6O2S	C1=CC=C(C(=C1)C(=O)O)S	109.01174; 153.00157	100.00; 20.63	56.98044; 109.01174	2.03; 100.00	82.99609; 109.01174	3.56; 100.00
1152	119.05024	120.0575149	C8H8O	CC1=CC=CC=C1C=O	91.05532; 119.05024	32.23; 100.00	91.05532; 119.05024	100.00; 32.75	65.03967; 91.05532	9.52; 100.00
1153	116.05057	117.0578492	C8H7N	CC1=CC=CC=C1C#N	64.01927; 116.05057	0.51; 100.00	64.01927; 116.05057	7.69; 100.00	63.02402; 64.01927; 88.01927; 116.05057	22.61; 32.83; 63.63; 100.00
1154	197.19109	198.1983654	C13H26O	CCCCCCCCCCCC(=O)C	155.18052; 197.19109	2.29; 100.00	41.00329; 57.03459; 179.18052; 197.19109	5.93; 6.20; 6.55; 100.00	41.00329; 43.01894; 53.03967; 57.03459; 57.07097; 65.03967; 67.05532; 71.08662; 93.07097; 97.06589; 99.11792; 111.08154; 111.11792; 123.11792; 125.09719; 125.13357; 127.14922; 139.11284; 141.12849; 181.15979; 197.19109	100.00; 52.84; 10.25; 85.70; 10.44; 9.99; 17.49; 25.62; 8.80; 6.16; 7.45; 8.61; 5.67; 7.13; 8.70; 7.76; 12.73; 10.40; 6.98; 5.96; 17.87
1155	192.17577	193.1830497	C13H23N	CCCCCCCCCCC=CC#N	151.14922; 192.17577	2.12; 100.00	40.01927; 66.03492; 149.13357; 151.14922; 161.13357; 163.14922; 175.14922; 192.17577	7.65; 1.57; 1.56; 3.04; 2.59; 1.81; 2.57; 100.00	40.01927; 52.01927; 53.03967; 63.02402; 64.01927; 65.03967; 66.03492; 67.05532; 71.08662; 81.07097; 83.08662; 90.03492; 91.05532; 93.07097; 95.08662; 97.10227; 105.07097; 107.08662; 108.08187; 109.10227; 111.11792; 119.08662; 121.10227; 123.11792; 133.10227; 135.11792; 147.11792; 149.13357; 161.13357; 163.14922; 192.17577	16.61; 15.99; 21.05; 21.50; 100.00; 36.60; 46.29; 52.91; 24.61; 17.42; 14.22; 16.12; 19.97; 32.30; 12.82; 23.56; 17.97; 42.11; 26.38; 20.48; 19.68; 31.10; 24.94; 22.34; 16.08; 14.56; 15.10; 15.10; 16.58; 20.44; 28.40
1156	169.15979	170.1670653	C11H22O	CCCCCCCCCC(=O)C	127.14922; 169.15979	5.62; 100.00	41.00329; 57.03459; 127.14922; 151.14922; 169.15979	6.14; 4.79; 5.18; 6.41; 100.00	41.00329; 43.01894; 51.02402; 53.03967; 57.03459; 57.07097; 65.03967; 67.05532; 71.08662; 93.07097; 97.06589; 111.08154; 125.09719; 169.15979	100.00; 16.79; 4.72; 7.74; 58.24; 4.88; 5.75; 11.62; 8.61; 6.78; 5.28; 4.95; 4.78; 6.20
1157	104.05057	105.0578492	C7H7N	C=CC1=CC=CC=N1	78.03492; 104.05057	3.35; 100.00	78.03492; 104.05057	22.36; 100.00	49.00837; 50.00362; 51.02402; 52.01927; 64.01927; 78.03492	19.14; 26.27; 16.30; 19.96; 100.00; 58.01
1158	182.15504	183.1623143	C11H21NO	CCCCC(CC)COCCC#N	70.02984; 111.11792; 127.11284; 129.12849; 182.15504	47.65; 16.65; 32.35; 32.97; 100.00	52.01927; 53.00329; 57.07097; 68.01419; 70.02984; 81.07097; 107.08662; 109.10227; 111.11792; 127.11284; 129.12849; 182.15504	27.16; 81.10; 15.31; 26.82; 100.00; 10.83; 15.50; 14.48; 80.90; 22.83; 40.34; 14.69	40.01927; 51.02402; 52.01927; 68.01419; 83.05024; 85.06589; 87.08154; 93.07097; 95.05024; 95.08662; 97.06589; 97.10227; 99.08154; 99.11792; 101.09719; 111.11792; 113.09719; 123.08154; 125.09719; 127.11284; 129.12849	24.72; 7.50; 7.31; 12.00; 19.58; 6.94; 9.47; 9.11; 9.64; 11.08; 9.02; 20.25; 65.83; 6.93; 100.00; 24.53; 29.61; 7.16; 8.56; 22.47; 23.74
1159	186.18634	187.1936144	C11H25NO	CCCCC(CC)COCCCN	74.06114; 111.11792; 127.11284; 129.12849; 186.18634	10.18; 17.25; 28.54; 18.46; 100.00	57.07097; 58.06622; 72.04549; 74.06114; 111.11792; 127.11284; 129.12849; 186.18634	9.68; 8.71; 100.00; 34.99; 43.46; 9.27; 15.34; 17.25	54.03492; 55.01894; 72.04549; 83.05024; 97.10227; 99.08154; 101.09719; 111.11792; 113.09719; 127.11284; 129.12849	18.45; 15.70; 14.27; 13.02; 18.31; 60.86; 100.00; 24.76; 30.05; 22.75; 25.54
1160	290.08564	291.0929146	C15H17NO3S	CCN(CC1=CC(=CC=C1)S(=O)(=O)O)C2=CC=CC=C2	262.05434; 290.08564	2.67; 100.00	120.08187; 171.01214; 180.08187; 260.03869; 262.05434; 288.06999; 290.08564	10.21; 22.84; 13.75; 68.36; 47.19; 13.03; 100.00	42.03492; 80.96519; 92.05057; 104.05057; 156.08187; 156.99649; 180.08187; 182.09752; 238.05434; 260.03869; 262.05434; 274.05434; 288.06999	7.54; 84.39; 7.00; 7.58; 10.64; 46.26; 33.23; 9.38; 25.09; 100.00; 8.96; 15.46; 30.06
1161	287.93914	288.946412	C11H6Cl3NO2	CC1=C(C(=NO1)C2=C(C=CC=C2Cl)Cl)C(=O)Cl	251.96246; 287.93914	17.20; 100.00	251.96246; 287.93914	52.91; 100.00	34.96940; 192.96173; 251.96246; 256.93332	100.00; 79.84; 35.10; 37.53
1162	223.02798	224.0352552	C10H9ClN2O2	C1=CC=C2C(=C1)C(=O)N(C(=O)N2)CCCl	161.03565; 187.05130; 223.02798	23.98; 19.79; 100.00	34.96940; 161.03565	100.00; 23.51	41.99854; 118.02984; 135.02000; 145.04074; 161.03565	76.52; 100.00; 12.97; 22.26; 33.76
1163	225.09547	226.102751	C12H18O2S	CCCC(=O)C(CC)SC1=C(OC=C1)C	41.00329; 68.98044; 70.99609; 73.01174; 86.99101; 110.99101; 113.00666; 225.09547	14.40; 4.67; 5.61; 12.33; 10.51; 10.08; 100.00; 54.95	41.00329; 68.98044; 69.03459; 70.99609; 73.01174; 81.03459; 84.97536; 86.99101; 95.08662; 110.99101; 113.00666; 125.04304	9.91; 7.28; 3.39; 10.40; 3.07; 5.00; 4.66; 4.61; 5.26; 7.40; 100.00; 4.78	32.98044; 41.00329; 56.98044; 67.01894; 68.98044; 69.03459; 70.99609; 73.01174; 75.02739; 94.99609; 113.00666	21.92; 12.35; 6.43; 8.54; 13.70; 5.50; 22.70; 18.47; 13.28; 9.90; 100.00
1164	191.07137	192.0786442	C11H12O3	CC(CC1=CC2=C(C=C1)OCO2)C=O	135.04515; 191.07137	10.57; 100.00	133.06589; 135.04515; 159.04515; 161.06080; 0.011594); 163.07645; 191.07137	25.65; 22.18; 25.31; 23.57; ; 60.22; 100.00	53.00329; 55.01894; 65.03967; 69.03459; 93.03459; 105.03459; 107.05024; 131.05024; 133.06589; 135.04515; 147.04515; 161.06080; 191.07137	58.36; 20.74; 44.09; 31.03; 61.72; 29.00; 34.35; 25.70; 60.08; 44.51; 72.79; 75.04; 100.00
1165	253.02885	254.036128	C10H10N2O4S	CC1=NN(C(=O)C1)C2=CC(=CC=C2)S(=O)(=O)O	147.05639; 253.02885	3.55; 100.00	121.04074; 145.04074; 147.05639; 225.03394; 253.02885	11.38; 13.46; 27.39; 10.38; 100.00	41.00329; 53.01452; 64.01927; 65.99854; 80.96519; 93.04582; 105.04582; 119.06147; 121.04074; 123.05639; 128.96519; 130.98084; 147.05639; 156.99649; 185.00264; 211.01829; 225.03394	27.79; 13.30; 13.58; 19.09; 74.28; 10.19; 10.41; 11.07; 24.27; 18.29; 15.42; 17.83; 10.92; 100.00; 13.56; 15.05; 22.60
1166	273.07685	274.0841235	C15H14O5	C1=CC(=CC=C1CCC(=O)C2=C(C=C(C=C2O)O)O)O	167.03498; 273.07685	42.43; 100.00	41.00329; 121.06589; 125.02442; 147.04515; 151.00368; 153.01933; 167.03498; 231.06628; 255.06628; 273.07685	12.61; 9.16; 83.08; 9.03; 11.13; 28.16; 54.28; 8.87; 24.26; 100.00	41.00329; 43.01894; 65.00329; 67.01894; 68.99820; 83.01385; 93.03459; 93.07097; 101.03967; 117.03459; 119.05024; 125.02442; 127.04007; 161.06080; 203.07137; 229.05063; 231.06628	41.70; 7.52; 7.61; 5.55; 33.86; 8.94; 79.27; 5.96; 7.53; 20.43; 100.00; 17.04; 7.83; 15.36; 5.75; 6.58; 16.15
1167	189.12849	190.1357652	C13H18O	CC(C)(C)C1=CC=C(C=C1)CCC=O	147.11792; 189.12849	100.00; 82.12	41.00329; 147.11792; 161.13357	41.27; 100.00; 79.91	41.00329; 91.05532; 103.05532; 105.07097; 117.07097; 131.08662; 133.10227; 145.10227; 147.11792; 161.13357	68.85; 45.17; 26.38; 16.07; 68.48; 58.82; 39.22; 15.38; 100.00; 45.11
1168	235.20674	236.2140155	C16H28O	CC1C2CC(C1(C)C)CC2C3CCCC(C3)O	233.19109; 235.20674	6.28; 100.00	217.19617; 235.20674	5.01; 100.00	191.18052; 193.19617; 201.16487; 217.19617; 233.19109; 235.20674	6.51; 6.86; 17.44; 100.00; 13.36; 94.57
1169	107.06147	108.0687483	C6H8N2	C1=CC(=CN=C1)CN	78.03492; 107.06147	100.00; 83.42	78.03492; 107.06147	100.00; 6.87	40.01927; 50.00362; 52.01927; 64.01927; 66.03492; 77.01452; 78.03492; 91.03017	100.00; 9.89; 17.76; 21.95; 20.99; 6.72; 45.56; 9.45
1170	194.01266	195.0199395	C8H6ClN3O	C1=CC=C2C(=C1)C(=O)N(N=N2)CCl	77.03967; 194.01266	0.70; 100.00	77.03967; 118.02984; 194.01266	10.97; 13.79; 100.00	34.96940; 53.01452; 61.98030; 64.01927; 77.03967; 91.01894; 103.03017; 105.04582; 118.02984; 143.99701; 194.01266	43.40; 12.53; 24.88; 12.75; 70.45; 30.31; 12.95; 76.73; 100.00; 15.96; 17.36
1171	101.10842	102.1156985	C5H14N2	CN(C)CCCN	44.05057; 101.10842	10.80; 100.00	99.09277; 101.10842	6.78; 100.00	28.01927; 30.03492; 42.03492; 44.05057	10.58; 23.48; 36.32; 100.00
1172	265.18092	266.1881947	C16H26O3	CCCCCCCCCCC=CC1CC(=O)OC1=O	247.17035; 265.18092	5.41; 100.00	41.00329; 59.01385; 96.99312; 205.15979; 219.17544; 221.19109; 237.18600; 247.17035; 265.18092	6.55; 8.82; 6.35; 8.03; 5.95; 33.64; 10.76; 10.60; 100.00	41.00329; 44.99820; 53.03967; 59.01385; 63.02402; 65.03967; 67.01894; 67.05532; 71.01385; 71.08662; 81.07097; 113.02442; 119.08662; 121.10227; 123.00877; 123.04515; 125.06080; 135.11792; 137.02442; 147.11792; 149.13357; 153.05572; 159.10267; 163.14922; 193.19617; 219.17544; 221.19109; 223.17035; 237.18600; 247.17035; 265.18092	100.00; 9.74; 12.97; 27.37; 7.97; 9.07; 8.58; 16.48; 20.04; 16.12; 7.63; 24.34; 10.92; 9.83; 8.27; 9.97; 7.28; 7.31; 39.10; 7.47; 7.94; 8.09; 8.07; 9.20; 12.20; 12.36; 41.67; 16.43; 27.58; 22.10; 8.85
1173	242.24894	243.2562147	C15H33NO	CCCCCCCCCCCCOCCCN	185.19109; 242.24894	19.83; 100.00	72.04549; 183.17544; 185.19109; 242.24894	16.39; 16.11; 45.26; 100.00	43.01894; 45.03459; 55.01894; 57.03459; 59.05024; 69.03459; 72.04549; 73.06589; 87.08154; 97.06589; 101.09719; 111.08154; 111.11792; 113.09719; 113.13357; 115.11284; 125.13357; 127.11284; 127.14922; 129.12849; 141.12849; 143.14414; 155.14414; 167.18052; 183.17544; 185.19109; 242.24894	16.64; 6.39; 22.21; 11.32; 24.19; 7.38; 12.09; 10.40; 10.85; 6.88; 17.55; 6.88; 13.22; 13.48; 8.61; 17.55; 11.38; 25.86; 16.56; 42.51; 23.51; 28.44; 7.47; 8.97; 43.28; 100.00; 7.72
1174	133.08702	134.0942943	C6H14O3	CC(C(CO)C(C)O)O	89.06080; 97.06589; 115.07645; 133.08702	15.67; 100.00; 93.64; 71.52	43.01894; 57.03459; 69.03459; 71.05024; 73.06589; 85.06589; 97.06589; 101.06080; 115.07645	100.00; 13.85; 10.38; 10.84; 13.08; 18.05; 26.95; 15.50; 23.85	43.01894; 45.03459; 57.03459	100.00; 50.59; 33.85
1176	103.02231	104.0295861	C4H8OS	CSCCC=O	46.99609; 103.02231	100.00; 49.94	44.98044; 46.99609	4.39; 100.00	32.98044; 46.99609	0.40; 100.00
1177	146.01037	147.0176416	C5H9NS2	CSCCCN=C=S	57.97569; 146.01036	35.20; 100.00	46.99609; 57.97569	100.00; 35.57	46.99609; 57.97569	8.15; 100.00
1178	343.32177	344.3290453	C21H44O3	CCCCCCCCCCCCCCCCCCOCC(CO)O	59.01385; 73.02950; 91.04007; 267.26934; 269.28499; 343.32177	99.55; 40.85; 86.80; 26.98; 32.67; 100.00	59.01385; 61.02950; 73.02950; 91.04007; 251.27442; 267.26934; 269.28499; 343.32177	100.00; 12.57; 54.71; 29.39; 21.85; 53.80; 59.04; 36.88	41.00329; 43.01894; 55.01894; 57.03459; 59.01385; 59.05024; 143.14414; 185.19109; 213.22239; 237.25877; 239.27442; 267.26934; 269.28499	53.51; 13.53; 11.04; 3.35; 100.00; 4.66; 2.49; 2.59; 2.90; 2.49; 6.67; 14.02; 12.38
1179	186.18634	187.1936144	C11H25NO	CCCCCCCCOCCCN	127.11284; 129.12849; 186.18634	56.92; 27.85; 100.00	72.04549; 74.06114; 111.11792; 127.11284; 129.12849; 186.18634	15.64; 10.33; 17.10; 30.51; 40.35; 100.00	43.01894; 45.03459; 55.01894; 57.03459; 59.05024; 71.05024; 73.06589; 87.08154; 97.10227; 101.09719; 111.11792; 127.11284; 129.12849	54.11; 16.88; 24.05; 33.58; 100.00; 28.97; 81.79; 58.06; 23.88; 51.15; 24.72; 32.77; 88.11
1180	182.15504	183.1623143	C11H21NO	CCCCCCCCOCCC#N	70.02984; 127.11284; 182.15504	75.87; 60.15; 100.00	52.01927; 53.00329; 68.01419; 70.02984; 107.08662; 111.11792; 123.08154; 127.11284; 129.12849; 165.12849; 182.15504	22.97; 49.89; 30.14; 90.20; 19.31; 14.28; 14.98; 39.76; 57.81; 19.29; 100.00	41.00329; 43.01894; 45.03459; 53.03967; 55.01894; 57.03459; 59.05024; 67.01894; 67.05532; 69.03459; 71.05024; 73.06589; 87.08154; 97.10227; 99.08154; 101.09719; 111.11792; 125.09719; 127.11284; 129.12849	13.60; 51.05; 13.83; 10.85; 37.52; 28.61; 100.00; 12.90; 14.80; 25.80; 23.06; 75.28; 40.56; 17.56; 10.26; 37.20; 16.49; 13.75; 27.02; 57.70
1184	160.03796	161.0452337	C7H6F3N	C1=CC(=CC(=C1)N)C(F)(F)F	133.02706; 160.03796	0.07; 100.00	133.02706; 160.03796	0.78; 100.00	66.03492; 160.03796	2.38; 100.00
1185	189.01689	190.0241639	C8H5F3O2	C1=CC(=CC(=C1)C(F)(F)F)C(=O)O	145.02706; 189.01689	6.96; 100.00	145.02706; 189.01689	60.87; 100.00	145.02706; 189.01689	100.00; 5.80
1186	174.05361	175.0608838	C8H8F3N	CC1=C(C=CC=C1N)C(F)(F)F	104.05057; 174.05361	0.99; 100.00	154.04738; 174.05361	21.00; 100.00	68.99576; 104.05057; 172.03796; 174.05361	100.00; 19.04; 28.28; 60.81
1187	186.01722	187.0244982	C8H4F3NO	C1=CC(=CC(=C1)N=C=O)C(F)(F)F	119.01141; 186.01722	0.05; 100.00	68.01419; 186.01722	0.49; 100.00	65.99854; 186.01722	72.64; 100.00
1191	263.15135	264.1586259	C13H20N4O2	CC1=C(C=C(C=C1)NC(=O)N(C)C)NC(=O)N(C)C	192.11424; 263.15135	24.05; 100.00	72.04549; 147.05639; 149.07204; 175.05130; 176.08294; 190.09859; 192.11424; 218.09350; 220.10915; 263.15135	12.45; 51.51; 11.42; 30.22; 9.57; 21.80; 65.28; 100.00; 10.50; 15.89	119.06147; 121.07712; 132.04549; 147.05639; 149.07204; 175.05130; 177.06695	10.22; 22.57; 10.22; 100.00; 57.42; 64.71; 17.28
1192	167.0826	168.0898776	C8H12N2O2	C(COCCOCCC#N)C#N	61.02950; 70.02984; 114.05605; 167.08260	53.87; 40.31; 89.64; 100.00	53.00329; 61.02950; 68.01419; 70.02984; 97.02950; 114.05605	34.95; 100.00; 44.76; 61.28; 55.38; 31.50	40.01927; 41.00329; 43.01894; 56.99820; 59.01385; 61.02950; 68.01419	17.70; 16.41; 26.14; 19.57; 100.00; 52.87; 22.36
1193	217.05063	218.0579088	C12H10O4	C1=CC(=CC=C1C=CC(=O)O)C=CC(=O)O	173.06080; 217.05063	58.51; 100.00	127.05532; 129.07097	90.44; 100.00	127.05532; 129.07097	100.00; 63.04
1194	363.00601	364.0132809	C8H5F13O	C(CO)C(C(C(C(C(C(F)(F)F)(F)F)(F)F)(F)F)(F)F)(F)F	342.99978; 363.00601	9.27; 100.00	18.99895; 363.00601	12.94; 100.00	360.99036; 363.00601	63.13; 100.00
1195	431.03222	432.0394956	C12H9F13O2	CC(=C)C(=O)OCCC(C(C(C(C(C(F)(F)F)(F)F)(F)F)(F)F)(F)F)(F)F	85.02950; 431.03222	39.26; 100.00	18.99895; 85.02950; 111.04515; 332.99544; 431.03222	15.06; 39.60; 18.53; 16.73; 100.00	41.03967; 85.02950; 431.03222	100.00; 81.28; 14.80
1196	462.99962	464.0068935	C10H5F17O	C(CO)C(C(C(C(C(C(C(C(F)(F)F)(F)F)(F)F)(F)F)(F)F)(F)F)(F)F)(F)F	442.99339; 462.99962	11.84; 100.00	18.99895; 462.99962	18.97; 100.00	460.98397; 462.99962	63.50; 100.00
1197	254.86134	255.868611	C4H4Cl4O2S	C1C(C(CS1(=O)=O)(Cl)Cl)(Cl)Cl	218.88466; 254.86133	0.11; 100.00	218.88466; 254.86133	8.92; 100.00	34.96940; 254.86133	22.72; 100.00
1198	538.7498	539.75708	C15H12Br4O2	CC(C)(C1=CC(=C(C(=C1)Br)O)Br)C2=CC(=C(C(=C2)Br)O)Br	248.85561; 538.74980	0.56; 100.00	288.88691; 538.74980	3.83; 100.00	248.85561; 272.85561; 288.88691; 418.82872; 522.71850; 538.74980	77.84; 35.29; 38.88; 27.42; 81.66; 100.00
1199	239.15537	240.1626486	C16H20N2	CC1=CC(=CC(=C1N)C)C2=CC(=C(C(=C2)C)N)C	237.13972; 239.15537	0.86; 100.00	237.13972; 239.15537	18.91; 100.00	132.08187; 142.06622; 144.08187; 146.09752; 184.11317; 222.12882; 223.12407; 237.13972; 239.15537	6.77; 6.14; 6.29; 9.05; 10.18; 5.87; 29.59; 100.00; 13.23
1200	649.78278	650.7901	C15H12I3NO4	C1=CC(=C(C=C1CC(C(=O)O)N)I)OC2=CC(=C(C(=C2)I)O)I	632.75623; 649.78278	33.64; 100.00	126.90502; 360.82280; 576.76640; 588.76640; 605.79295; 632.75623; 649.78278	100.00; 8.40; 7.97; 51.96; 7.90; 15.28; 36.22	126.90502; 649.78278	100.00; 2.57
1201	139.11284	140.1201151	C9H16O	CC1CC(=O)CC(C1)(C)C	83.05024; 139.11284	0.43; 100.00	41.00329; 139.11284	7.69; 100.00	41.00329; 107.05024; 121.06589; 121.10227; 123.08154; 139.11284	65.84; 39.92; 77.28; 100.00; 62.28; 65.24
1202	209.1547	210.1619799	C13H22O2	CC1CC(CC(C1)(C)C)OC(=O)C(=C)C	85.02950; 141.12849; 209.15470	95.56; 100.00; 41.38	41.03967; 85.02950; 141.12849	20.23; 100.00; 17.69	41.03967; 85.02950; 123.11792	100.00; 17.41; 5.95
1203	261.14962	262.1568946	C16H22O3	CC1CC(CC(C1)(C)C)OC(=O)C2=CC=CC=C2O	93.03459; 141.12849; 261.14962; 0.00024238)	22.39; 100.00; 17.11;	93.03459; 121.10227; 137.02442	100.00; 6.85; 6.37	63.02402; 65.00329; 65.03967; 67.01894; 77.03967; 83.01385; 93.03459; 95.01385; 119.01385; 229.12340	5.10; 4.74; 30.82; 11.75; 4.48; 6.50; 100.00; 3.70; 5.82; 3.54
1204	219.17142	220.1786926	C10H24N2O3	C(CN)COCCOCCOCCCN	59.01385; 61.02950; 100.07679; 116.07170; 118.08735; 160.09792; 162.11357; 219.17142	20.37; 18.76; 14.31; 19.58; 33.64; 21.02; 30.45; 100.00	43.01894; 59.01385; 61.02950; 100.07679; 116.07170; 118.08735; 144.10300; 219.17142	100.00; 29.52; 37.16; 24.06; 29.39; 59.03; 45.25; 74.28	43.01894; 59.01385; 61.02950; 89.06080; 105.05572	7.12; 53.86; 100.00; 8.59; 7.50
1205	213.11457	214.1218465	C12H14N4	C1=CC(=C(C=C1C2=CC(=C(C=C2)N)N)N)N	196.08802; 213.11457	4.74; 100.00	145.07712; 196.08802; 213.11457	6.12; 56.67; 100.00	119.06147; 131.06147; 133.07712; 196.08802	32.28; 100.00; 20.14; 23.52
1206	251.01483	252.0221037	C12H10Cl2N2	C1=CC(=C(C=C1C2=CC(=C(C=C2)N)Cl)Cl)N	34.96940; 251.01483	19.75; 100.00	34.96940; 251.01483	48.00; 100.00	34.96940; 150.01160; 215.03815	100.00; 6.50; 6.93
1207	295.07243	296.0797069	C16H12N2O4	COC1=C(C=CC(=C1)C2=CC(=C(C=C2)N=C=O)OC)N=C=O	41.99854; 295.07243	2.13; 100.00	41.99854; 237.03057; 239.04622; 265.06187; 295.07243	48.68; 40.77; 17.05; 28.56; 100.00	40.01927; 41.99854; 52.01927; 65.99854; 172.04040; 174.05605; 211.05130; 213.06695; 225.03057; 239.04622; 265.06187	5.06; 100.00; 5.05; 16.22; 12.66; 5.07; 8.74; 3.10; 4.17; 4.23; 3.78
1208	217.10162	218.108899	C9H18N2O2S	CC(C)(C)C(=NOC(=O)NC)CSC	160.08016; 217.10162	74.23; 100.00	29.99854; 41.99854; 46.99609; 56.01419; 74.02475; 144.08524; 160.08016; 217.10162	6.02; 8.34; 100.00; 58.84; 20.54; 7.53; 10.71; 19.00	41.99854; 46.99609; 56.01419; 72.00910; 86.00699	95.91; 100.00; 17.63; 21.99; 10.67
1209	83.08662	84.09390038	C6H12	CC(C)(C)C=C	81.07097; 83.08662	0.44; 100.00	81.07097; 83.08662	7.59; 100.00	67.05532; 83.08662	17.41; 100.00
1210	99.08154	100.088815	C6H12O	CC(=O)C(C)(C)C	83.05024; 99.08154	0.34; 100.00	81.07097; 99.08154	8.39; 100.00	41.00329; 43.01894	100.00; 12.53
1211	129.05572	130.0629942	C6H10O3	CC(C)(C)C(=O)C(=O)O	85.06589; 129.05572	48.95; 100.00	85.06589; 129.05572	78.59; 100.00	44.99820; 69.03459	33.78; 100.00
1212	195.13905	196.1463299	C12H20O2	CC(=O)OC1C(C2CCC1(C2)C)(C)C	59.01385; 195.13905	100.00; 33.68	59.01385; 135.11792	100.00; 9.77	41.00329; 59.01385; 117.07097; 119.08662; 121.10227; 123.11792; 133.10227; 153.12849; 195.13905	100.00; 78.26; 12.43; 18.26; 9.62; 12.88; 11.88; 10.44; 23.32
1213	99.04515	100.0524295	C5H8O2	CC(=CC(=O)O)C	55.05532; 99.04515	1.83; 100.00	55.05532; 99.04515	34.10; 100.00	41.00329; 55.05532; 65.00329	91.73; 96.06; 100.00
1214	127.07645	128.0837296	C7H12O2	CC(=CCOC(=O)C)C	59.01385; 85.06589	100.00; 20.35	41.00329; 59.01385	2.51; 100.00	41.00329; 59.01385	43.08; 100.00
1215	211.12407	212.1313485	C14H16N2	CC1=C(C=CC(=C1)C2=CC(=C(C=C2)N)C)N	209.10842; 211.12407	3.68; 100.00	209.10842; 211.12407	14.21; 100.00	106.06622; 118.06622; 128.05057; 130.06622; 132.08187; 184.11317; 195.09277; 209.10842; 211.12407	61.25; 70.70; 94.24; 74.77; 87.19; 73.23; 100.00; 88.13; 30.65
1216	255.13905	256.1463299	C17H20O2	CC1=C(C=CC(=C1)C(C)(C)C2=CC(=C(C=C2)O)C)O	199.11284; 255.13905	0.78; 100.00	107.05024; 255.13905	13.05; 100.00	107.05024; 131.05024; 133.06589; 145.06589; 147.08154; 185.09719; 197.09719; 199.11284; 201.12849; 211.11284; 221.09719; 223.11284; 225.12849; 227.14414; 239.10775; 253.12340; 255.13905	80.17; 39.58; 100.00; 30.37; 24.07; 20.30; 13.68; 26.68; 15.60; 11.09; 12.22; 13.05; 15.45; 10.26; 25.76; 20.53; 47.96
1217	99.11792	100.1252005	C7H16	CCC(C)(C)CC	97.10227; 99.11792	4.39; 100.00	97.10227; 99.11792	14.05; 100.00	83.08662; 99.11792	26.56; 100.00
1218	207.08154	208.088815	C15H12O	C1=CC=C(C=C1)C(=CC=O)C2=CC=CC=C2	179.08662; 207.08154	27.54; 100.00	205.06589; 207.08154	100.00; 71.73	153.03459; 205.06589	8.02; 100.00
1219	208.99477	210.0020511	C6H10O4S2	C(CSSCCC(=O)O)C(=O)O	64.95252; 102.98592	100.00; 40.29	32.98044; 64.95252; 105.00157	30.75; 100.00; 19.49	32.98044; 64.95252	5.92; 100.00
1220	122.07237	123.0796473	C6H9N3	C(CNCCC#N)C#N	69.04582; 122.07237	9.44; 100.00	40.01927; 52.01927; 67.03017; 69.04582; 105.04582; 122.07237	17.85; 17.98; 43.37; 89.16; 100.00; 50.76	40.01927; 65.01452; 67.03017	27.91; 100.00; 24.61
1221	247.05467	248.0619488	C12H12N2O2S	C1=CC(=CC(=C1)S(=O)(=O)C2=CC=CC(=C2)N)N	206.02812; 247.05467	0.08; 100.00	220.04377; 247.05467	3.00; 100.00	92.05057; 156.01247; 204.01247; 206.02812; 220.04377; 247.05467	65.21; 68.27; 34.47; 48.09; 54.65; 100.00
1222	166.08735	167.0946287	C9H13NO2	C1CCC2(C1)CC(=O)NC(=O)C2	41.99854; 166.08735	5.14; 100.00	41.99854; 166.08735	29.55; 100.00	40.01927; 41.99854; 124.04040; 138.05605; 146.06114; 148.07679; 164.07170; 166.08735	11.26; 100.00; 6.71; 7.20; 7.65; 12.01; 60.78; 8.78
1223	177.0227	178.02998	C6H10O4S	C(CSCCC(=O)O)C(=O)O	32.98044; 58.99609; 86.99101; 105.00157; 115.02231	29.37; 24.28; 11.90; 100.00; 11.04	32.98044; 58.99609; 105.00157	100.00; 53.66; 34.07	32.98044; 56.98044; 58.99609; 61.01174	100.00; 28.25; 18.55; 37.02
1224	139.03354	140.0408194	C6H8N2S	C(CSCCC#N)C#N	32.98044; 86.00699	23.74; 100.00	32.98044; 83.99134; 86.00699	100.00; 31.45; 39.45	32.98044; 81.97569	100.00; 17.25
1225	214.09859	215.105862	C12H13N3O	C1=CC(=CC=C1N)OC2=CC(=C(C=C2)N)N	92.05057; 214.09859	4.09; 100.00	108.04549; 121.04074; 132.04549; 145.04074; 214.09859	8.45; 16.58; 6.42; 12.13; 100.00	40.01927; 41.00329; 52.01927; 53.01452; 65.00329; 67.01894; 76.01927; 78.03492; 79.03017; 94.02984; 107.06147; 108.04549; 121.04074; 123.05639; 132.04549; 135.05639; 145.04074; 171.05639	15.29; 6.57; 5.76; 6.79; 6.86; 6.89; 7.97; 11.04; 13.88; 6.50; 17.97; 37.06; 100.00; 11.32; 6.55; 5.51; 45.13; 6.69
1227	257.86886	258.876139	C6HCl4NO2	C1(=C(C(=NC(=C1Cl)Cl)C(=O)O)Cl)Cl	213.87903; 257.86886	4.13; 100.00	213.87903; 257.86886	96.26; 100.00	213.87903; 257.86886	93.55; 100.00
1228	194.91767	195.924948	C6H3Cl3O	C1=C(C=C(C(=C1Cl)Cl)Cl)O	134.94099; 194.91767	0.02; 100.00	134.94099; 194.91767	1.13; 100.00	134.94099; 194.91767	29.41; 100.00
1229	206.08227	207.0895433	C11H13NO3	COC1=CC(=CC(=C1OC)OC)CC#N	176.07170; 206.08227	0.21; 100.00	176.07170; 206.08227	18.98; 100.00	41.00329; 55.01894; 64.01927; 66.03492; 76.01927; 78.03492; 89.99854; 106.02984	13.01; 60.91; 100.00; 18.67; 60.06; 15.07; 17.89; 10.93
1230	108.05672	109.0639972	C5H7N3	C1=CN=CC(=C1N)N	81.04582; 108.05672	2.81; 100.00	67.03017; 108.05672	5.80; 100.00	40.01927; 52.01927; 53.01452; 54.03492; 65.01452; 67.03017	33.40; 21.75; 17.34; 33.80; 100.00; 51.16
1231	121.07712	122.0843983	C7H10N2	CC1=CC(=C(C=C1)N)N	104.05057; 121.07712	11.26; 100.00	104.05057; 121.07712	9.74; 100.00	50.00362; 51.02402; 64.01927; 65.03967; 67.05532; 78.03492; 90.03492; 92.05057; 104.05057; 119.06147; 121.07712	17.72; 21.57; 14.59; 32.31; 100.00; 9.45; 11.52; 50.78; 9.65; 19.67; 18.67
1232	122.97738	123.9846556	C4H6Cl2	C=CC(CCl)Cl	34.96940; 122.97738	25.79; 100.00	34.96940; 72.98505	100.00; 10.34	34.96940; 72.98505	100.00; 1.03
1233	195.90323	196.9105048	C4HCl2NO2S	C1(=C(SN=C1Cl)C(=O)O)Cl	151.91340; 195.90323	24.02; 100.00	151.91340; 195.90323	100.00; 48.33	151.91340; 195.90323	100.00; 19.17
1234	159.97263	160.9799046	C6H5Cl2N	C1=CC(=C(C=C1N)Cl)Cl	99.99595; 159.97263	1.18; 100.00	109.98030; 159.97263	7.39; 100.00	34.96940; 159.97263	7.27; 100.00
1235	172.95664	173.9639201	C7H4Cl2O	C1=CC(=C(C=C1C=O)Cl)Cl	34.96940; 172.95664	100.00; 23.82	34.96940; 144.96173	100.00; 18.11	34.96940; 144.96173	100.00; 1.46
1236	188.95156	189.9588348	C7H4Cl2O2	C1=CC(=C(C=C1C(=O)O)Cl)Cl	144.96173; 188.95156	100.00; 91.44	144.96173; 188.95156	100.00; 28.75	84.98505; 128.97488; 144.96173; 188.95156	83.86; 86.23; 100.00; 61.14
1237	160.95664	161.9639201	C6H4Cl2O	C1=CC(=C(C=C1O)Cl)Cl	100.97997; 160.95664	0.48; 100.00	110.96432; 160.95664	6.01; 100.00	34.96940; 132.96173	100.00; 44.76
1238	185.95189	186.9591691	C7H3Cl2NO	C1=CC(=C(C=C1N=C=O)Cl)Cl	125.97521; 185.95189	0.38; 100.00	125.97521; 185.95189	1.96; 100.00	65.99854; 185.95189	100.00; 33.00
1239	83.05024	84.05751487	C5H8O	C1CC=COC1	79.01894; 83.05024	20.26; 100.00	81.03459; 83.05024	13.23; 100.00	41.00329; 51.02402; 55.01894; 57.03459; 63.02402; 65.00329; 79.01894; 81.03459	100.00; 88.71; 49.35; 70.83; 74.20; 49.58; 61.01; 46.40
1240	147.04515	148.0524295	C9H8O2	C1CC(=O)OC2=CC=CC=C21	119.05024; 147.04515	3.10; 100.00	93.03459; 119.05024; 147.04515	22.74; 100.00; 54.62	41.00329; 49.00837; 63.02402; 77.03967; 93.03459; 101.03967; 103.05532; 117.03459; 119.05024; 121.02950; 147.04515	32.96; 18.14; 28.64; 100.00; 24.02; 14.79; 49.45; 70.85; 17.42; 82.48; 16.34
1241	153.01933	154.0266087	C7H6O4	C1=CC(=C(C=C1C(=O)O)O)O	109.02950; 153.01933	100.00; 50.97	41.00329; 79.01894; 81.03459; 107.01385; 109.02950; 153.01933	6.75; 6.34; 6.09; 6.15; 100.00; 29.77	41.00329; 51.02402; 65.00329; 67.01894; 79.01894; 81.03459; 109.02950	100.00; 53.58; 22.42; 17.24; 12.70; 9.49; 34.25
1242	179.03498	180.0422587	C9H8O4	C1=CC(=C(C=C1C=CC(=O)O)O)O	135.04515; 179.03498	100.00; 39.45	117.03459; 135.04515	10.34; 100.00	65.03967; 91.01894; 93.03459; 105.03459; 107.05024; 117.03459; 133.02950; 135.04515	51.61; 29.94; 38.30; 44.97; 57.48; 58.64; 60.66; 100.00
1243	120.08187	121.0891494	C8H11N	CC1=C(C=C(C=C1)N)C	103.05532; 120.08187	0.64; 100.00	40.01927; 120.08187	5.65; 100.00	40.01927; 42.03492; 51.02402; 66.03492; 92.05057; 103.05532; 104.05057; 118.06622; 120.08187	100.00; 52.68; 87.11; 38.07; 26.02; 26.18; 22.12; 43.15; 84.71
1244	133.06589	134.0731649	C9H10O	CC1=C(C=C(C=C1)C=O)C	105.07097; 133.06589	22.82; 100.00	105.07097; 133.06589	44.11; 100.00	51.02402; 65.00329; 65.03967; 79.05532; 103.05532; 105.07097; 131.05024; 133.06589	8.89; 7.15; 11.58; 6.71; 17.76; 100.00; 55.89; 4.86
1245	121.06589	122.0731649	C8H10O	CC1=C(C=C(C=C1)O)C	93.03459; 121.06589	0.77; 100.00	41.00329; 43.01894; 51.02402; 65.00329; 91.01894; 121.06589	11.41; 4.59; 9.60; 6.55; 11.13; 100.00	41.00329; 43.01894; 49.00837; 51.02402; 65.00329; 77.03967; 91.05532; 95.05024; 103.05532; 119.05024; 121.06589	87.73; 29.83; 19.70; 100.00; 22.92; 26.84; 21.39; 17.01; 17.76; 22.25; 93.07
1246	113.0608	114.0680796	C6H10O2	CCC(=O)C(=O)CC	85.02950; 113.06080	72.91; 100.00	55.01894; 57.03459	33.94; 100.00	41.00329; 57.03459	100.00; 99.19
1247	143.14414	144.1514153	C9H20O	CC(CCO)CC(C)(C)C	141.12849; 143.14414	4.93; 100.00	111.11792; 113.13357; 143.14414	50.25; 32.84; 100.00	43.01894; 95.08662; 97.10227; 143.14414	100.00; 3.77; 3.79; 4.14
1248	139.11284	140.1201151	C9H16O	CC1=CC(CC(C1)(C)C)O	121.10227; 139.11284	1.21; 100.00	121.10227; 139.11284	67.57; 100.00	105.07097; 107.05024; 121.06589; 121.10227; 123.08154; 139.11284	100.00; 27.85; 44.31; 96.00; 40.54; 53.06
1249	141.12849	142.1357652	C9H18O	CC(CC=O)CC(C)(C)C	99.11792; 141.12849	2.90; 100.00	111.11792; 113.13357; 141.12849	55.29; 44.01; 100.00	41.00329; 43.01894	100.00; 32.14
1250	175.08952	176.0967929	C9H17ClO	CC(CC(=O)Cl)CC(C)(C)C	34.96940; 175.08952	24.73; 100.00	34.96940; 139.11284	100.00; 16.01	34.96940; 76.97997	100.00; 6.35
1251	185.1547	186.1619799	C11H22O2	CC(CCOC(=O)C)CC(C)(C)C	59.01385; 185.15470	29.88; 100.00	59.01385; 111.11792	100.00; 13.79	41.00329; 59.01385	38.92; 100.00
1252	195.91292	196.920197	C5H2Cl3NO	C1=C(C(=O)NC(=C1Cl)Cl)Cl	41.99854; 195.91292	0.25; 100.00	34.96940; 195.91292	4.95; 100.00	41.99854; 195.91292	73.33; 100.00
1253	151.0513	152.0585775	C7H8N2O2	C1=C(C=C(C=C1N)N)C(=O)O	107.06147; 151.05130	100.00; 99.22	107.06147; 151.05130	100.00; 30.59	40.01927; 66.03492; 91.03017; 107.06147	33.56; 24.40; 27.97; 100.00
1254	292.84544	293.85272	C7H4Br2O3	C1=C(C=C(C(=C1Br)O)Br)C(=O)O	248.85561; 292.84544	62.23; 100.00	248.85561; 292.84544	100.00; 89.03	78.91889; 116.93454; 118.91380; 128.93454; 144.92945; 186.90363; 248.85561; 292.84544	88.31; 63.48; 58.53; 100.00; 34.82; 45.11; 86.89; 33.81
1255	159.97263	160.9799046	C6H5Cl2N	C1=C(C=C(C=C1Cl)Cl)N	118.94608; 159.97263	0.22; 100.00	58.96940; 159.97263	0.75; 100.00	34.96940; 159.97263	1.58; 100.00
1256	188.95156	189.9588348	C7H4Cl2O2	C1=C(C=C(C=C1Cl)Cl)C(=O)O	144.96173; 188.95156	39.81; 100.00	144.96173; 188.95156	100.00; 77.73	144.96173; 188.95156	100.00; 28.16
1257	206.91767	207.924948	C7H3Cl3O	C1=C(C=C(C=C1Cl)Cl)C(=O)Cl	34.96940; 206.91767	1.50; 100.00	34.96940; 206.91767	3.64; 100.00	34.96940; 206.91767	23.56; 100.00
1258	160.95664	161.9639201	C6H4Cl2O	C1=C(C=C(C=C1Cl)Cl)O	118.94608; 160.95664	0.54; 100.00	118.94608; 160.95664	5.02; 100.00	41.00329; 160.95664	71.07; 100.00
1259	347.91581	348.923089	C13H7Cl4NO2	C1=CC(=C(C=C1NC(=O)C2=C(C(=CC(=C2)Cl)Cl)O)Cl)Cl	185.95189; 347.91581	14.32; 100.00	185.95189; 347.91581	92.73; 100.00	34.96940; 65.99854; 132.96173; 159.97263; 160.95664; 185.95189; 211.96754; 259.94422; 287.93914	100.00; 16.94; 10.41; 99.69; 23.45; 89.77; 17.31; 11.92; 13.35
1260	204.94647	205.9537494	C7H4Cl2O3	C1=C(C=C(C(=C1C(=O)O)O)Cl)Cl	160.95664; 204.94647	50.67; 100.00	160.95664; 204.94647	100.00; 9.57	34.96940; 41.00329; 58.96940; 72.98505; 84.98505; 100.97997; 130.94608; 132.96173; 160.95664; 176.95156; 186.93591; 204.94647	100.00; 10.15; 13.48; 21.96; 18.39; 9.97; 11.79; 12.00; 62.72; 12.23; 10.43; 13.45
1261	254.19142	255.1986998	C18H25N	CCCC1C(=CC(=CN1C2=CC=CC=C2)CC)CC	210.12882; 254.19142	1.47; 100.00	92.05057; 184.11317; 196.11317; 200.14447; 210.12882; 212.14447; 224.14447; 226.16012; 254.19142	3.15; 3.20; 3.68; 5.25; 4.66; 5.70; 4.04; 7.30; 100.00	77.03967; 92.05057; 95.08662; 121.10227; 130.06622; 134.09752; 146.09752; 148.11317; 160.11317; 170.09752; 182.09752; 184.11317; 186.12882; 194.09752; 196.11317; 198.12882; 208.11317; 210.12882; 222.12882; 224.14447; 226.16012; 252.17577; 254.19142	6.36; 100.00; 6.56; 12.18; 6.59; 9.95; 17.88; 12.97; 8.71; 8.29; 11.77; 15.66; 5.55; 5.90; 20.73; 19.52; 13.77; 25.05; 7.60; 7.53; 10.62; 24.38; 13.17
1262	431.85991	432.86719	C9H9I2NO3	C1=C(C=C(C(=C1I)O)I)CC(C(=O)O)N	126.90502; 431.85991	15.12; 100.00	72.00910; 126.90502; 259.95779; 370.84353; 387.87008; 414.83336; 431.85991	28.80; 100.00; 9.54; 19.14; 9.62; 9.98; 63.07	72.00910; 126.90502	2.15; 100.00
1263	125.0608	126.0680796	C7H10O2	CC1CC(C(=O)C1=O)C	97.06589; 125.06080	8.98; 100.00	41.03967; 55.01894; 63.02402; 65.03967; 67.05532; 69.03459; 69.07097; 93.03459; 95.05024; 97.06589; 125.06080	19.75; 39.69; 28.02; 35.07; 100.00; 32.67; 43.39; 27.03; 21.00; 80.20; 61.55	41.00329; 41.03967; 49.00837; 51.02402; 53.00329; 55.01894; 56.99820; 57.03459; 63.02402; 65.03967; 67.05532; 69.03459; 71.05024; 97.06589; 107.05024; 109.02950; 125.06080	14.32; 17.23; 20.80; 18.20; 14.38; 100.00; 26.34; 35.89; 45.49; 59.89; 27.94; 31.21; 20.79; 23.13; 16.49; 19.44; 17.19
1264	125.09719	126.1044651	C8H14O	CC(C)CC(C)(C#C)O	107.08662; 125.09719	15.87; 100.00	67.01894; 97.06589; 107.08662; 125.09719	20.10; 10.31; 61.48; 100.00	49.00837; 51.02402; 67.01894; 69.03459; 79.05532; 81.07097; 91.05532; 97.06589; 107.08662; 125.09719	31.28; 100.00; 19.34; 32.68; 38.18; 18.59; 43.38; 22.96; 16.82; 20.68
1265	120.08187	121.0891494	C8H11N	CC1=CC(=CC(=C1)N)C	80.05057; 120.08187	0.39; 100.00	104.05057; 120.08187	5.68; 100.00	64.01927; 120.08187	16.39; 100.00
1266	121.06589	122.0731649	C8H10O	CC1=CC(=CC(=C1)O)C	79.05532; 121.06589	0.45; 100.00	79.05532; 121.06589	10.07; 100.00	65.00329; 121.06589	11.60; 100.00
1267	233.1547	234.1619799	C15H22O2	CC(C)(C)C1=CC(=CC(=C1O)C(C)(C)C)C=O	205.15979; 233.15470	20.71; 100.00	205.15979; 233.15470	48.94; 100.00	119.01385; 159.04515; 161.06080; 189.12849; 205.15979; 217.12340; 231.13905; 233.15470	11.80; 23.20; 28.63; 100.00; 10.60; 71.97; 12.58; 13.03
1268	251.15001	252.1572885	C11H24O6	COCCOCCOCCOCCOCCO	43.01894; 59.01385; 61.02950; 73.02950; 75.04515; 87.04515; 103.04007; 105.05572; 147.06628; 193.10815; 251.15001	54.07; 100.00; 55.47; 35.37; 38.00; 74.05; 39.10; 46.15; 37.38; 52.59; 36.84	43.01894; 59.01385; 61.02950; 73.02950; 75.04515; 87.04515; 103.04007; 105.05572; 131.07137; 149.08193; 193.10815; 251.15001	31.19; 63.76; 100.00; 21.86; 15.14; 14.96; 12.48; 23.71; 11.97; 14.19; 23.85; 18.29	43.01894; 59.01385; 61.02950; 73.02950; 75.04515; 103.04007; 105.05572; 131.07137	31.61; 68.85; 100.00; 10.09; 19.55; 30.08; 25.92; 18.59
1269	249.17075	250.1780239	C12H26O5	CCCCOCCOCCOCCOCCO	43.01894; 59.01385; 61.02950; 73.06589; 87.04515; 103.04007; 105.05572; 131.07137; 147.06628; 161.11832; 191.09250; 249.17075	22.63; 100.00; 66.90; 24.31; 50.22; 31.92; 29.51; 27.15; 48.91; 23.25; 26.51; 46.45	43.01894; 59.01385; 61.02950; 73.06589; 87.04515; 103.04007; 105.05572; 117.09210; 161.11832; 249.17075	27.18; 44.06; 100.00; 12.64; 16.48; 21.29; 19.82; 13.81; 37.65; 19.72	43.01894; 59.01385; 61.02950; 103.04007; 105.05572; 131.07137	32.66; 79.51; 100.00; 68.01; 37.10; 21.60
1270	201.11323	202.1205091	C10H18O4	C=COCCOCCOCCOC=C	43.01894; 59.01385; 61.02950; 71.05024; 87.04515; 89.06080; 115.07645; 131.07137; 157.08702; 201.11323	100.00; 94.48; 23.98; 36.27; 46.40; 30.87; 55.50; 57.12; 47.66; 65.57	41.00329; 43.01894; 59.01385; 61.02950; 85.02950; 87.04515; 89.06080; 105.05572; 115.07645; 131.07137; 157.08702; 159.10267; 175.09758; 201.11323	18.44; 100.00; 23.93; 55.08; 27.79; 35.48; 27.16; 19.20; 18.22; 15.90; 22.59; 11.66; 14.07; 22.18	41.00329; 43.01894; 56.99820; 59.01385; 61.02950; 69.03459; 85.02950; 87.04515; 103.04007; 105.05572	24.67; 90.14; 14.57; 100.00; 52.48; 17.39; 14.77; 30.67; 15.21; 22.40
1271	368.15035	369.1576228	C21H23NO5	CC(=O)OC1C=CC2C3CC4=C5C2(C1OC5=C(C=C4)OC(=O)C)CCN3C	284.12922; 326.13978; 368.15035	24.96; 67.27; 100.00	59.01385; 266.11865; 282.11357; 308.12922; 326.13978; 368.15035	100.00; 17.91; 6.49; 8.26; 11.95; 15.43	41.00329; 43.01894; 59.01385; 270.11357; 292.09792; 294.11357; 296.12922; 350.13978; 368.15035	68.84; 13.47; 100.00; 14.67; 13.13; 8.75; 15.50; 8.48; 21.36
1272	143.03498	144.0422587	C6H8O4	CC1C(=O)OC(C(=O)O1)C	71.01385; 87.00877; 89.02442; 143.03498	91.32; 43.14; 32.08; 100.00	43.01894; 55.01894; 71.01385; 87.00877; 89.02442	58.72; 40.20; 100.00; 55.01; 20.77	43.01894; 53.00329; 55.01894; 71.01385	100.00; 26.40; 30.72; 50.96
1273	445.10097	446.1082475	C20H22N4O4S2	COC1=C(C=C(C=C1)C2NC(=S)N3N2C(=S)NC3C4=CC(=C(C=C4)OC)OC)OC	411.11325; 445.10097	17.29; 100.00	57.97569; 107.05024; 123.04515; 137.06080; 222.03427; 234.03427; 236.04992; 238.06557; 277.02233; 293.01724; 307.03289; 355.08703; 383.11834; 386.11800; 389.07476; 399.05911; 411.11325; 413.07476; 415.09041; 429.06967; 445.10097	38.46; 14.09; 16.24; 51.82; 17.61; 19.34; 30.57; 28.45; 12.16; 30.86; 18.30; 12.26; 16.50; 21.25; 13.40; 20.29; 71.95; 93.58; 15.69; 100.00; 84.69	57.97569; 69.03459; 93.03459; 95.05024; 97.02950; 107.05024; 123.04515; 125.06080; 137.06080; 180.02371; 208.04377; 222.03427; 236.04992; 238.06557; 293.01724; 309.04854; 333.04854; 345.04854; 347.06419; 357.04854; 361.04346; 375.05911; 385.04346; 387.05911; 389.07476; 399.05911; 401.07476; 415.09041; 427.05402; 443.08532	100.00; 18.57; 18.20; 20.48; 7.61; 6.74; 33.47; 8.19; 29.70; 7.47; 9.15; 32.13; 9.36; 17.96; 10.56; 10.91; 8.96; 25.70; 9.26; 8.59; 7.09; 18.96; 10.07; 7.63; 18.45; 13.53; 12.06; 9.24; 8.09; 23.77
1274	305.16191	306.1691906	C15H22N4O3	CCCN1C=NC2=C1C(=O)N(C(=O)N2C)CCCCC(=O)C	207.08875; 277.16700; 305.16191	8.66; 7.63; 100.00	96.08187; 107.06147; 114.09244; 136.08802; 138.10367; 164.08294; 165.04180; 171.11390; 203.05745; 205.07310; 207.08875; 243.08875; 245.10440; 247.08366; 247.12005; 257.14078; 259.15643; 260.14045; 261.13570; 263.11496; 269.14078; 271.12005; 277.16700; 285.13570; 287.15135; 305.16191	4.41; 8.75; 7.86; 2.52; 5.04; 3.17; 14.09; 2.53; 7.46; 5.44; 8.32; 4.58; 4.51; 3.41; 39.14; 5.28; 8.47; 2.94; 7.73; 4.55; 5.78; 13.20; 7.52; 19.06; 100.00; 18.77	41.01452; 41.99854; 57.03459; 94.04107; 96.08187; 107.06147; 114.09244; 122.03599; 136.08802; 165.04180; 179.05745; 189.04180; 191.05745; 193.07310; 197.09317; 199.10882; 203.05745; 205.07310; 217.07310; 219.08875; 221.09317; 221.10440; 231.08875; 233.10440; 235.12005; 245.10440; 247.12005; 248.14045; 263.15135; 278.15102; 303.14626	36.10; 100.00; 30.39; 49.85; 80.37; 58.95; 31.67; 28.96; 25.64; 43.68; 29.98; 38.12; 80.17; 33.96; 47.19; 63.58; 41.66; 64.32; 49.65; 46.09; 28.09; 29.34; 23.66; 29.50; 31.11; 25.33; 24.32; 50.35; 21.96; 23.10; 55.46
1275	151.11284	152.1201151	C10H16O	CC(=CCCC(=CC=O)C)C	107.08662; 109.10227; 151.11284	100.00; 72.04; 98.18	107.08662; 109.10227; 119.08662; 121.10227; 123.11792	31.25; 16.52; 15.19; 33.55; 100.00	41.00329; 43.01894; 63.02402; 65.00329; 65.03967; 67.01894; 67.05532; 79.05532; 81.07097; 91.05532; 93.07097; 103.05532; 105.07097; 107.08662; 117.07097	81.16; 15.73; 50.02; 31.99; 100.00; 85.85; 20.88; 48.08; 20.23; 15.51; 22.58; 18.37; 11.91; 33.34; 16.06
1276	157.15979	158.1670653	C10H22O	CCC(C)(CCCC(C)C)O	155.14414; 157.15979	3.91; 100.00	71.05024; 109.10227; 113.13357; 127.11284; 139.14922; 157.15979	12.67; 4.96; 6.42; 7.85; 31.96; 100.00	43.01894; 53.03967; 55.05532; 57.03459; 59.05024; 67.05532; 69.07097; 71.05024; 71.08662; 73.06589; 81.07097; 83.08662; 87.08154; 95.08662; 109.10227; 113.09719; 123.11792; 127.11284; 139.14922; 141.12849; 157.15979	15.27; 13.44; 17.69; 33.17; 12.29; 12.52; 23.43; 63.42; 14.96; 25.61; 15.16; 20.48; 21.14; 17.29; 22.21; 14.06; 22.71; 26.52; 19.88; 12.00; 100.00
1277	237.186	238.1932801	C15H26O2	CC=C(C)C(=O)OCCC(C)CCC=C(C)C	97.02950; 99.04515; 237.18600	27.17; 100.00; 47.46	55.05532; 81.03459; 97.02950; 99.04515; 125.13357; 237.18600	3.51; 19.51; 7.35; 100.00; 6.39; 3.61	51.02402; 53.03967; 55.05532; 71.01385; 99.04515	40.24; 12.71; 100.00; 27.85; 34.75
1278	155.14414	156.1514153	C10H20O	CCC(C)(CCC=C(C)C)O	73.06589; 155.14414	2.60; 100.00	43.01894; 69.03459; 71.05024; 109.10227; 111.11792; 125.09719; 137.13357; 155.14414	8.57; 15.99; 10.14; 7.04; 7.53; 6.97; 27.84; 100.00	43.01894; 51.02402; 55.05532; 57.03459; 59.05024; 65.03967; 67.05532; 69.03459; 71.05024; 73.06589; 79.05532; 97.10227; 109.10227; 111.08154; 111.11792; 121.10227; 125.09719; 127.11284; 137.13357; 139.11284; 155.14414	26.35; 27.59; 24.73; 80.57; 44.20; 28.96; 39.98; 22.50; 51.57; 31.90; 31.74; 39.10; 96.84; 41.85; 26.50; 100.00; 23.03; 62.89; 49.31; 22.96; 48.42
1279	209.1547	210.1619799	C13H22O2	CCC(=O)OC(C)(CCC=C(C)C)C=C	73.02950; 209.15470	100.00; 9.49	51.02402; 55.01894; 57.03459; 65.03967; 71.01385; 73.02950; 103.05532; 107.08662; 109.10227; 133.10227; 135.11792; 153.12849	25.16; 30.31; 8.52; 7.44; 19.50; 100.00; 6.63; 12.31; 8.33; 35.22; 40.66; 8.16	55.01894; 57.03459; 65.03967; 69.03459; 71.01385; 71.05024; 73.02950; 79.05532; 83.05024; 119.08662; 121.10227; 125.09719; 127.11284; 135.11792; 137.09719; 153.12849	48.00; 11.32; 8.44; 8.50; 7.60; 35.00; 100.00; 10.90; 9.25; 8.37; 12.90; 16.81; 11.53; 15.64; 9.80; 15.83
1280	167.10775	168.1150297	C10H16O2	CC(=CCCC(=CC(=O)O)C)C	123.11792; 167.10775	30.26; 100.00	121.10227; 123.11792	25.26; 100.00	44.99820; 55.05532; 59.01385; 63.02402; 65.03967; 67.05532; 79.05532; 81.03459; 81.07097; 83.01385; 105.07097; 107.08662; 121.10227; 123.04515; 123.11792	38.25; 22.29; 28.54; 38.40; 58.82; 30.79; 100.00; 32.01; 45.40; 38.92; 39.92; 88.29; 18.77; 40.82; 30.38
1281	157.15979	158.1670653	C10H22O	CC(C)CCCC(C)CCO	127.14922; 157.15979	8.28; 100.00	125.13357; 127.14922; 139.14922; 157.15979	60.16; 21.15; 19.60; 100.00	43.01894; 53.03967; 55.05532; 57.07097; 67.05532; 69.03459; 69.07097; 71.08662; 85.06589; 85.10227; 87.08154; 95.08662; 109.10227; 111.11792; 113.13357; 125.13357; 141.12849; 157.15979	100.00; 15.48; 17.05; 22.01; 26.77; 13.75; 33.21; 21.53; 16.50; 13.43; 14.17; 12.30; 30.66; 21.55; 21.43; 24.44; 18.38; 53.07
1282	199.17035	200.17763	C12H24O2	CCC(C)(CCCC(C)C)OC(=O)C	59.01385; 199.17035	100.00; 79.79	57.07097; 59.01385; 113.13357; 139.14922; 157.15979; 199.17035	7.18; 100.00; 10.28; 39.36; 7.27; 9.09	41.00329; 59.01385	36.30; 100.00
1283	155.14414	156.1514153	C10H20O	CC(C)CCCC(C)CC=O	137.13357; 155.14414	8.55; 100.00	109.10227; 111.11792; 123.11792; 125.13357; 127.14922; 137.13357; 155.14414	39.31; 48.25; 75.85; 70.77; 40.02; 31.55; 100.00	41.00329; 43.01894; 53.03967; 57.07097; 65.03967; 67.01894; 67.05532; 69.03459; 69.07097; 71.08662; 81.07097; 83.05024; 95.08662; 109.10227; 111.11792; 139.11284	100.00; 42.32; 10.69; 10.55; 81.55; 29.70; 10.51; 11.26; 9.48; 9.02; 70.31; 9.93; 20.40; 10.61; 26.06; 10.49
1284	173.1547	174.1619799	C10H22O2	CC(CCCC(C)(C)O)CCO	171.13905; 173.15470	5.86; 100.00	141.12849; 155.14414; 171.13905; 173.15470	8.45; 9.41; 23.61; 100.00	43.01894; 53.03967; 55.01894; 57.03459; 59.05024; 71.05024; 73.06589; 81.07097; 83.05024; 85.06589; 99.08154; 101.09719; 127.11284; 129.12849; 139.11284; 155.14414; 173.15470	79.00; 24.72; 23.79; 88.20; 65.34; 45.70; 20.76; 26.94; 23.99; 24.10; 75.52; 25.95; 25.42; 23.90; 19.96; 23.71; 100.00
1285	487.05943	488.0667025	C17H28O8S4	C(CS)C(=O)OCC(COC(=O)CCS)(COC(=O)CCS)COC(=O)CCS	32.98044; 102.98592; 105.00157; 291.03664; 293.05229; 335.06285; 369.05057; 381.05057; 399.06114; 419.08398; 453.07170; 487.05943	22.34; 9.59; 22.84; 8.16; 10.10; 11.44; 9.11; 7.40; 28.87; 8.42; 17.23; 100.00	32.98044; 105.00157	100.00; 13.63	32.98044; 56.98044; 58.99609; 61.01174; 86.99101; 100.97027; 105.00157; 311.06285; 365.01927; 367.03492; 383.06623; 399.06114; 425.04040	100.00; 17.72; 46.88; 10.86; 6.51; 22.80; 67.43; 19.55; 7.30; 7.98; 8.42; 7.15; 8.46
1286	291.2078	292.2150781	C17H28N2O2	CC(C)(C)C1=CC(=CC(=C1O)C(C)(C)C)CCC(=O)NN	259.17035; 291.20780	2.56; 100.00	41.00329; 73.04074; 219.17544; 233.19109; 259.17035; 261.18600; 291.20780	10.85; 11.43; 10.62; 46.92; 40.74; 22.36; 100.00	41.00329; 57.03459; 161.09719; 181.13464; 201.12849; 203.14414; 203.18052; 217.15979; 219.17544; 229.15979; 231.17544; 233.19109; 245.15470; 258.14995; 259.17035; 261.18600; 274.18125; 275.17650	8.12; 4.75; 3.37; 3.02; 9.30; 100.00; 3.33; 27.50; 25.21; 2.92; 8.38; 14.67; 5.48; 6.38; 4.40; 3.71; 5.65; 13.42
1287	157.09825	158.1055277	C7H14N2O2	C(CN(CCO)CCO)C#N	58.02984; 72.04549; 81.04582; 86.06114; 95.06147; 98.06114; 104.07170; 107.06147; 113.07204; 125.07204; 126.05605; 157.09825	8.52; 8.01; 12.84; 33.83; 9.15; 13.13; 36.26; 23.60; 7.93; 62.18; 27.80; 100.00	40.01927; 60.04549; 67.03017; 69.04582; 81.04582; 93.04582; 95.06147; 96.04549; 97.07712; 98.06114; 107.06147; 109.07712; 111.05639; 113.07204; 121.07712; 122.06114; 123.05639; 125.07204; 139.08769; 140.07170; 157.09825	49.33; 11.84; 18.34; 13.80; 13.24; 17.70; 100.00; 27.22; 20.12; 32.46; 14.38; 16.58; 12.42; 64.42; 30.04; 41.51; 15.53; 40.77; 45.72; 14.44; 24.55	40.01927; 41.00329; 43.01894; 52.01927; 54.03492; 58.02984; 60.04549; 67.03017; 70.02984; 74.06114; 95.06147; 97.07712	100.00; 12.27; 47.98; 62.58; 44.66; 21.80; 25.32; 19.26; 13.51; 10.81; 22.09; 52.83
1288	173.10842	174.1156985	C11H14N2	CCN(CCC#N)C1=CC=CC=C1	42.03492; 145.07712; 173.10842	9.49; 11.66; 100.00	40.01927; 42.03492; 92.05057; 104.05057; 118.06622; 120.08187; 128.05057; 130.06622	91.75; 68.13; 54.06; 18.54; 29.62; 100.00; 15.47; 29.84	40.01927; 42.03492; 65.01452; 67.03017; 77.03967; 92.05057; 94.06622; 104.05057; 116.05057; 118.06622; 130.06622; 142.06622	82.95; 31.20; 9.14; 20.77; 8.11; 100.00; 7.54; 20.14; 33.67; 10.96; 23.05; 9.48
1289	426.22457	427.2318504	C20H33N3O7	C1CN1CCC(=O)OCC(CO)(COC(=O)CCN2CC2)COC(=O)CCN3CC3	42.03492; 96.04549; 114.05605; 426.22457	11.85; 100.00; 68.21; 50.71	96.04549; 114.05605; 202.10848; 230.10340; 232.11905; 274.12961; 311.16125; 325.14051; 327.15616; 329.17181; 331.18746; 426.22457	69.64; 40.06; 12.92; 15.71; 100.00; 8.85; 24.90; 10.89; 8.49; 24.40; 7.82; 27.07	40.01927; 41.00329; 42.03492; 54.03492; 59.01385; 64.01927; 68.05057; 71.01385; 84.00910; 86.02475; 92.01419; 94.02984; 96.04549; 108.00910; 110.02475; 112.04040; 114.05605; 198.07718; 200.09283; 232.11905; 240.08775; 242.10340; 244.11905; 267.13503; 325.14051; 327.15616; 329.17181; 355.15107; 359.18237; 424.20892; 426.22457	14.31; 19.71; 28.66; 14.09; 19.13; 7.14; 20.11; 10.38; 9.81; 16.66; 8.78; 9.48; 23.08; 9.72; 18.05; 14.07; 100.00; 8.78; 8.44; 12.54; 10.63; 14.64; 16.92; 8.91; 8.95; 10.28; 17.75; 9.32; 8.96; 22.51; 22.07
1290	154.13497	155.1422476	C8H17N3	CN(C)CCCNCCC#N	113.10842; 154.13497	2.38; 100.00	54.03492; 56.05057; 67.03017; 69.04582; 96.08187; 101.10842; 125.10842; 137.10842; 154.13497	4.67; 6.10; 7.96; 9.86; 4.95; 9.66; 4.74; 100.00; 90.77	40.01927; 42.03492; 44.05057; 50.00362; 52.01927; 54.03492; 65.01452; 67.03017; 95.06147; 121.07712	83.98; 36.61; 60.99; 23.66; 15.26; 16.29; 37.55; 100.00; 15.58; 16.25
1291	119.08662	120.0939004	C9H12	C1C=CCC2C1CC=C2	117.07097; 119.08662	1.03; 100.00	117.07097; 119.08662	3.72; 100.00	117.07097; 119.08662	100.00; 41.18
1292	150.05605	151.0633285	C8H9NO2	CC(=O)NC1=CC(=CC=C1)O	108.04549; 150.05605	100.00; 49.94	66.03492; 108.04549; 150.05605	13.44; 100.00; 15.66	40.01927; 41.00329; 58.02984; 63.02402; 64.01927; 66.03492; 67.01894; 80.05057; 82.02984; 108.04549; 134.02475	31.11; 45.39; 17.15; 23.43; 44.63; 30.33; 25.92; 32.40; 24.20; 100.00; 24.17
1293	137.0608	138.0680796	C8H10O2	CC1=CC(=C(O1)C)C(=O)C	95.05024; 137.06080	19.24; 100.00	41.00329; 43.01894; 77.03967; 93.03459; 95.05024; 119.05024; 137.06080	100.00; 32.42; 37.15; 40.05; 65.08; 23.43; 78.72	41.00329; 43.01894; 67.01894; 93.03459; 119.05024	100.00; 36.28; 12.42; 16.82; 9.00
1294	220.09792	221.1051933	C12H15NO3	CCCC(=O)NC1=CC(=C(C=C1)O)C(=O)C	150.05605; 220.09792	5.17; 100.00	106.02984; 108.04549; 132.04549; 134.02475; 134.06114; 150.05605; 152.07170; 202.08735; 220.09792	11.01; 78.77; 7.98; 10.46; 17.99; 100.00; 15.11; 7.91; 43.27	41.00329; 43.01894; 52.01927; 66.03492; 96.04549; 97.02950; 106.02984; 108.04549; 120.04549; 122.06114; 132.04549; 134.02475; 134.06114; 148.04040; 150.05605	21.38; 8.41; 8.40; 9.57; 15.00; 8.60; 38.70; 70.67; 19.08; 18.88; 54.84; 100.00; 13.06; 8.62; 92.72
1295	127.04007	128.0473441	C6H8O3	CC(=O)C1CCOC1=O	41.00329; 43.01894; 83.01385; 85.02950; 127.04007	15.53; 10.22; 8.81; 29.81; 100.00	41.00329; 43.01894; 65.00329; 67.01894; 69.03459; 83.01385; 85.02950; 99.04515; 109.02950; 127.04007	78.27; 65.85; 20.16; 56.53; 100.00; 79.04; 44.97; 23.24; 34.41; 46.22	41.00329; 43.01894; 44.99820; 55.01894; 57.03459; 65.03967; 67.01894; 69.03459; 83.05024	49.49; 31.63; 100.00; 23.11; 41.21; 37.22; 73.57; 48.15; 19.63
1296	219.08154	220.088815	C16H12O	CC(=O)C1=CC2=C(C=CC3=CC=CC=C32)C=C1	177.07097; 219.08154	6.63; 100.00	177.07097; 219.08154	40.05; 100.00	177.07097; 219.08154	42.61; 100.00
1297	120.04549	121.0527638	C7H7NO	CC(=O)C1=CN=CC=C1	78.03492; 120.04549	67.63; 100.00	78.03492; 120.04549	100.00; 24.33	41.00329; 50.00362; 51.02402; 52.01927; 75.02402; 78.03492; 93.03459; 120.04549	25.15; 14.19; 14.07; 35.18; 13.99; 100.00; 13.19; 20.36
1298	115.00839	116.0156673	C2H4N4S	C1(=NC(=S)NN1)N	57.97569; 84.98659; 115.00839	100.00; 22.24; 91.60	32.98044; 57.97569	46.66; 100.00	41.01452; 57.97569	100.00; 73.93
1299	170.00143	171.0087061	C7H6ClNO2	C1=CC(=C(C=C1C(=O)O)N)Cl	126.01160; 170.00143	74.46; 100.00	126.01160; 170.00143	100.00; 16.81	40.01927; 76.01927; 82.96940; 84.98505; 97.98030; 99.00070; 126.95923; 128.97488; 170.00143	20.64; 9.11; 49.19; 100.00; 19.82; 10.02; 14.06; 32.71; 10.47
1300	193.09825	194.1055277	C10H14N2O2	CCOC1=C(C=C(C=C1)NC(=O)C)N	121.04074; 123.05639; 151.08769; 193.09825	51.97; 24.66; 48.91; 100.00	41.99854; 58.02984; 121.04074; 123.05639; 151.08769; 163.05130; 165.06695; 193.09825	17.76; 82.20; 58.04; 23.79; 19.00; 37.20; 63.94; 100.00	40.01927; 41.99854; 43.01894; 58.02984; 64.01927; 66.03492; 82.02984; 84.04549; 106.02984; 107.06147; 108.04549; 109.04074; 121.04074; 123.05639; 148.04040; 149.03565; 165.06695; 191.08260	12.19; 28.95; 13.47; 14.22; 8.63; 14.31; 13.95; 11.19; 9.19; 8.15; 6.62; 6.59; 100.00; 53.11; 10.10; 6.11; 10.17; 26.19
[truncated: 4,520 more rows]
