# Supplementary material for: Emerging investigator series: nontargeted screening of aryl hydrocarbon receptor agonists in endangered beluga whales from the St. Lawrence Estuary: beyond legacy contaminants
Source: Royal Society of Chemistry journal article supplement (doi:10.1039/d4em00243a), 2024-01-01
Supplement: d4em00243a4.csv [file d4em00243a4.csv]

ID	mz	MonoisotopicMass	MolecularFormula	SMILES	cid	fragmz_10eV	fragIC_10eV	fragmz_20eV	fragIC_20eV	fragmz_40eV	fragIC_40eV
1	187.0502	186.0429274	C10H6N2O2	C1=CC(=C(C=C1C=C(C#N)C#N)O)O	2052	185.03455; 187.05020	4.58; 100.00	77.01342; 121.02841; 142.02874; 160.03930; 169.03964; 185.03455; 187.05020	18.83; 8.92; 8.57; 33.97; 13.43; 100.00; 82.13	50.00253; 88.01818; 90.03383; 93.03349; 100.01818; 102.03383; 113.01342; 127.02907; 129.04472; 130.02874; 132.04439; 142.02874; 160.03930; 185.03455	7.46; 8.85; 6.20; 7.84; 15.72; 37.47; 10.95; 10.62; 13.34; 6.69; 12.55; 37.31; 8.42; 100.00
2	339.21794	338.2106615	C20H26N4O	CCN(CC)C(=O)NC1CN(C2CC3=CNC4=CC=CC(=C34)C2=C1)C	3938	223.12297; 339.21794	54.73; 100.00	168.08078; 221.10732; 223.12297; 225.13862; 229.16993; 231.18558; 240.14952; 266.12879; 339.21794	10.91; 12.28; 100.00; 29.72; 11.07; 12.40; 36.73; 20.67; 63.77	44.04948; 72.04439; 72.08078; 166.06513; 168.08078; 170.09643; 180.08078; 182.09643; 192.08078; 194.09643; 219.09167; 221.10732; 223.12297; 225.13862; 227.15428; 229.16993; 231.18558; 240.14952; 266.12879; 0.087512	10.90; 19.18; 10.06; 10.20; 19.50; 10.77; 41.17; 18.56; 24.96; 19.65; 13.02; 39.47; 100.00; 17.14; 10.46; 19.21; 14.85; 8.81; 10.49; 0.058009
3	205.19508	204.1878008	C15H24	CC1CCC2C13CC=C(C(C3)C2(C)C)C	521207	165.16378; 205.19508	44.09; 100.00	161.13248; 163.14813; 165.16378; 203.17943; 205.19508	22.15; 100.00; 65.59; 20.34; 59.27	41.03858; 43.05423; 57.06988; 93.06988; 95.08553; 145.10118; 147.11683; 149.13248; 151.14813; 161.13248; 163.14813; 189.16378; 203.17943	15.65; 13.13; 8.59; 6.59; 13.34; 15.89; 100.00; 36.01; 14.44; 26.34; 8.48; 7.27; 31.12
4	137.13248	136.1252005	C10H16	CC1=CCC2CC1C2(C)C	6654	121.10118; 137.13248	1.94; 100.00	121.10118; 137.13248	9.11; 100.00	105.06988; 121.10118	50.34; 100.00
5	237.22129	236.2140155	C16H28O	CC1(CCCC2(C1CCC3(C2CCO3)C)C)C	107166	101.09609; 111.08044; 113.09609; 115.11174; 123.11683; 151.11174; 153.12739; 181.15869; 0.0052357; 219.21073; 221.18999; 237.22129	2.80; 5.44; 2.52; 2.42; 2.72; 3.50; 5.94; 2.54; 0.00094246); 6.80; 2.62; 100.00	41.03858; 43.05423; 55.05423; 57.06988; 67.05423; 69.06988; 81.06988; 83.04914; 83.08553; 85.10118; 97.06479; 97.10118; 99.08044; 101.09609; 123.11683; 0.061165); 125.13248; 137.13248; 139.14813; 0.072832); 149.09609; 151.11174; 151.14813; 153.12739; 153.16378; 155.14304; 179.14304; 189.16378; 191.17943; 205.19508; 219.21073; 237.22129	100.00; 58.31; 47.07; 40.13; 20.03; 41.96; 36.75; 13.34; 66.04; 38.10; 17.99; 18.38; 36.35; 19.14; 31.89; ; 30.69; 16.67; 52.29; ; 17.56; 28.80; 13.60; 68.09; 15.19; 20.49; 23.80; 16.74; 16.89; 28.97; 28.77; 77.11	39.02293; 41.03858; 43.05423; 55.05423; 57.03349; 57.06988; 65.03858; 67.05423; 69.06988; 79.05423; 81.06988; 83.04914; 83.08553; 85.06479; 93.06988; 95.08553; 97.06479; 99.08044; 109.10118; 111.08044; 123.11683; 135.11683; 139.14813; 191.17943; 207.17434; 209.18999; 221.18999; 235.20564	18.55; 100.00; 27.56; 94.11; 13.34; 10.84; 10.95; 42.77; 63.76; 15.91; 64.48; 21.96; 46.73; 78.92; 10.59; 25.53; 15.12; 26.54; 12.29; 11.88; 12.03; 11.18; 11.09; 13.52; 11.75; 15.42; 32.20; 11.29
6	137.13248	136.1252005	C10H16	CC1(C2CCC(=C)C1C2)C	14896	121.10118; 137.13248	3.09; 100.00	121.10118; 137.13248	14.12; 100.00	105.06988; 121.10118	44.99; 100.00
7	295.18049	294.1732133	C19H22N2O	CCC12CCCN3C1C4=C(CC3)C5=CC=CC=C5N4C(=O)C2	3195	267.14919; 295.18049	0.36; 100.00	293.16484; 295.18049	9.86; 100.00	144.08078; 249.13862; 251.15428; 253.13354; 253.16993; 265.13354; 267.14919; 267.18558; 269.16484; 279.14919; 0.32144; 293.16484; 295.18049	13.33; 12.04; 11.60; 6.63; 7.93; 39.38; 37.29; 15.69; 18.17; 28.62; 0.31561; 33.06; 100.00
8	303.15909	302.1518092	C18H22O4	C1=CC(=CC(=C1)O)CC(CO)C(CC2=CC(=CC=C2)O)CO	123725	107.04914; 165.09101; 179.10666; 181.12231; 191.10666; 209.11722; 255.13796; 257.15361; 267.13796; 285.14852; 303.15909	25.61; 14.10; 23.79; 10.31; 20.71; 22.47; 15.74; 10.70; 10.78; 32.45; 100.00	91.05423; 101.05971; 107.04914; 131.04914; 133.06479; 135.08044; 151.07536; 165.09101; 177.09101; 179.10666; 191.10666; 195.10157; 255.13796; 257.15361; 267.13796; 275.16417; 285.14852; 303.15909	12.86; 14.81; 83.27; 12.16; 30.52; 60.25; 12.75; 24.31; 56.70; 37.22; 40.77; 12.47; 90.59; 100.00; 85.91; 18.35; 43.31; 21.52	79.05423; 91.05423; 95.08553; 107.04914; 113.09609; 115.11174; 131.04914; 135.08044; 157.12231; 175.07536; 177.09101; 179.10666; 187.07536; 189.09101; 191.10666; 253.12231; 255.13796; 257.15361; 267.13796; 275.16417; 285.14852; 303.15909	19.00; 51.57; 17.07; 100.00; 17.20; 30.52; 17.87; 23.15; 14.28; 27.00; 17.22; 26.14; 37.27; 37.09; 51.91; 35.52; 45.12; 53.38; 27.35; 27.83; 21.16; 13.83
9	291.08631	290.0790382	C15H14O6	C1C(C(OC2=CC(=CC(=C21)O)O)C3=CC(=C(C=C3)O)O)O	1203	139.03897; 165.05462; 181.04954; 263.09140; 0.1034; 273.07575; 291.08631	4.80; 4.87; 17.75; 6.71; 0.081562; 21.98; 100.00	107.04914; 111.04406; 121.02841; 123.04406; 0.25609; 127.03897; 133.02841; 135.04406; 137.02332; 139.03897; 141.05462; 147.04406; 151.03897; 153.05462; 163.03897; 165.05462; 169.04954; 181.04954; 273.07575; 291.08631	14.23; 15.82; 23.14; 38.51; 0.1912; 14.32; 18.52; 18.01; 21.33; 100.00; 10.94; 13.57; 53.45; 16.69; 26.71; 28.37; 18.94; 16.21; 10.73; 86.98	39.02293; 51.02293; 65.03858; 67.01784; 67.05423; 68.99711; 71.01276; 81.03349; 93.03349; 95.04914; 107.04914; 111.04406; 121.02841; 123.04406; 125.05971; 127.03897; 133.02841; 135.04406; 137.02332; 139.03897; 149.02332; 151.03897; 153.05462; 165.01824; 179.03389; 219.06519; 233.08084; 247.06010; 249.07575; 263.09140; 273.07575	4.40; 6.61; 21.42; 4.87; 14.97; 4.60; 6.93; 4.35; 17.18; 20.66; 4.95; 8.67; 19.37; 100.00; 8.72; 5.69; 5.76; 4.79; 8.28; 20.32; 3.97; 7.71; 6.39; 3.79; 3.65; 7.08; 6.83; 5.51; 8.20; 4.64; 10.97
10	459.09219	458.0849114	C22H18O11	C1C(C(OC2=CC(=CC(=C21)O)O)C3=CC(=C(C(=C3)O)O)O)OC(=O)C4=CC(=C(C(=C4)O)O)O	1287	163.03897; 165.05462; 289.07066; 333.06049; 441.08162; 459.09219	16.97; 13.47; 100.00; 51.18; 22.31; 91.81	123.04406; 127.03897; 135.00767; 137.02332; 139.03897; 141.05462; 151.03897; 153.01824; 163.03897; 165.05462; 261.07575; 271.06010; 287.05501; 289.07066; 317.02919; 319.04484; 321.06049; 331.04484; 333.06049; 373.09179; 399.07106; 403.10236; 431.09727; 441.08162; 459.09219	17.69; 36.57; 11.39; 31.66; 50.84; 12.72; 16.22; 39.29; 18.41; 40.83; 14.86; 11.12; 10.48; 100.00; 26.65; 25.21; 20.09; 17.11; 41.19; 12.22; 11.18; 37.97; 12.58; 17.38; 92.79	69.03349; 73.02841; 111.04406; 125.02332; 127.03897; 137.02332; 139.03897; 141.05462; 151.03897; 153.01824; 155.03389; 163.03897; 165.05462; 167.07027; 179.03389; 181.04954; 209.04445; 261.07575; 287.05501; 289.07066; 291.08631; 305.06558; 307.08123; 317.02919; 321.06049; 335.07614; 373.09179; 385.05541; 399.07106; 441.08162; 459.09219	14.80; 10.86; 16.52; 30.32; 20.75; 14.22; 100.00; 19.25; 22.65; 65.95; 10.83; 27.82; 45.88; 23.67; 13.39; 14.38; 18.28; 16.37; 18.44; 17.31; 23.32; 15.09; 21.18; 17.31; 24.05; 14.26; 12.76; 16.13; 15.29; 11.02; 13.07
11	205.19508	204.1878008	C15H24	CC1(CCC=C2C13CCC(C3)C2(C)C)C	102562	163.14813; 205.19508; 0.46921	11.16; 100.00; 0.46395	43.05423; 121.10118; 123.11683; 133.10118; 135.11683; 137.13248; 149.13248; 161.13248; 163.14813; 165.16378; 205.19508	6.18; 14.92; 5.95; 6.34; 7.99; 6.51; 11.00; 16.72; 10.82; 6.26; 100.00	29.03858; 31.05423; 41.03858; 43.05423; 55.05423; 79.05423; 93.06988; 107.08553; 119.08553; 121.10118; 161.13248; 175.14813; 177.16378; 179.17943; 189.16378; 203.17943; 205.19508	100.00; 31.20; 82.41; 14.25; 46.21; 17.05; 21.04; 12.17; 21.35; 41.47; 28.46; 61.11; 14.97; 19.31; 40.97; 35.43; 54.52
12	155.14304	154.1357652	C10H18O	CC1CCC(C(C1)O)C(=C)C	24585	69.06988; 81.06988; 95.08553; 97.10118; 113.09609; 115.11174; 0.13058); 137.13248; 155.14304	17.56; 14.68; 50.85; 100.00; 81.98; 54.54; ; 48.76; 47.91	41.03858; 55.05423; 67.05423; 69.06988; 81.06988; 83.08553; 93.06988; 95.08553; 97.10118; 111.11683; 113.09609; 121.10118; 137.13248; 155.14304	40.57; 42.38; 28.99; 56.58; 41.63; 34.91; 18.82; 100.00; 80.69; 17.45; 23.22; 19.97; 34.66; 31.74	39.02293; 41.03858; 67.05423; 69.06988; 79.05423; 81.06988; 83.08553; 93.06988; 95.08553; 97.10118	39.69; 62.55; 22.68; 23.34; 17.90; 49.81; 31.44; 100.00; 82.80; 29.79
13	212.09173	211.0844579	C10H13NO4	CC(CC1=CC(=C(C=C1)O)O)(C(=O)O)N	4138	123.04406; 149.05971; 151.07536; 166.08626; 194.08117; 195.06519; 212.09173	13.55; 12.41; 20.64; 31.35; 13.13; 31.65; 100.00	44.04948; 56.04948; 58.06513; 86.06004; 105.03349; 107.04914; 108.04439; 109.02841; 123.04406; 125.05971; 138.09134; 148.07569; 149.05971; 150.09134; 151.07536; 166.08626; 168.10191; 177.05462; 184.09682; 195.06519; 212.09173	32.22; 22.61; 22.43; 13.02; 14.54; 32.10; 6.95; 7.17; 88.59; 10.57; 19.72; 44.43; 100.00; 32.81; 19.19; 89.12; 8.20; 10.77; 16.28; 10.60; 10.49	44.04948; 51.02293; 58.06513; 65.03858; 67.05423; 93.03349; 94.06513; 95.04914; 105.03349; 107.04914; 121.02841; 123.04406; 154.08626	9.38; 21.36; 13.17; 100.00; 48.71; 91.42; 10.52; 72.35; 24.14; 12.84; 22.57; 64.35; 13.36
14	180.13829	179.1310142	C11H17NO	CC(C(C1=CC=CC=C1)O)N(C)C	4374	162.12773; 180.13829	100.00; 78.65	44.04948; 46.06513; 72.08078; 91.05423; 117.06988; 146.09643; 162.12773	19.57; 26.48; 21.11; 20.87; 39.10; 17.38; 100.00	70.06513; 72.08078; 77.03858; 79.05423; 91.05423; 93.06988; 95.08553; 117.06988; 119.08553; 128.10699; 146.09643; 178.12264	9.19; 34.57; 100.00; 54.50; 84.58; 33.29; 9.10; 23.44; 13.58; 9.54; 40.86; 12.16
15	352.19072	351.1834437	C22H25NO3	CCC(C)COC(=O)C=CC1=CC=C(C=C1)N=CC2=CC=C(C=C2)OC	32222	71.08553; 264.10191; 272.16451; 282.11247	13.78; 50.49; 22.41; 10.07	41.03858; 43.05423; 55.05423; 71.08553; 121.06479; 134.06004; 136.07569; 224.10699; 226.12264; 236.10699; 238.12264; 264.10191; 266.11756; 270.14886; 272.16451; 280.09682; 282.11247; 294.11247; 304.13321; 322.14377; 324.15942; 334.18016; 352.19072	8.37; 5.50; 16.59; 24.54; 4.02; 12.89; 10.98; 3.99; 6.23; 19.23; 3.34; 100.00; 3.82; 6.26; 5.71; 9.84; 31.04; 7.79; 3.66; 6.63; 7.15; 4.81; 12.14	41.03858; 43.05423; 55.05423; 57.06988; 69.06988; 71.08553; 90.03383; 91.05423; 103.05423; 104.04948; 105.06988; 118.06513; 128.04948; 130.06513; 131.04914; 134.06004; 136.07569; 158.06004; 160.07569; 204.08078; 206.09643; 210.09134; 234.09134; 236.10699; 238.12264; 264.10191; 296.16451; 322.14377; 324.15942; 326.17507; 352.19072	10.55; 11.79; 11.67; 17.49; 4.61; 7.92; 3.23; 4.81; 5.00; 4.20; 13.38; 8.21; 3.81; 24.63; 3.42; 100.00; 10.77; 4.49; 5.21; 3.91; 3.26; 4.95; 5.22; 26.16; 5.71; 4.26; 3.88; 6.36; 3.42; 7.79; 4.38
16	355.19039	354.1831093	C22H26O4	CC1=C(C(=O)C(=C(C1=O)C)C(CCCCCC(=O)O)C2=CC=CC=C2)C	2449	149.05971; 205.12231; 249.09101; 251.10666; 253.12231; 295.16926; 327.19547; 337.17982; 355.19039	18.81; 4.97; 6.01; 14.39; 22.46; 8.60; 5.19; 27.47; 100.00	91.05423; 103.05423; 105.06988; 117.06988; 119.08553; 125.05971; 131.08553; 133.10118; 135.04406; 145.10118; 147.11683; 149.05971; 151.07536; 157.10118; 159.11683; 173.05971; 175.07536; 177.09101; 235.11174; 237.12739; 251.10666; 253.12231; 255.13796; 273.14852; 281.15361; 295.16926; 309.18491; 319.16926; 327.19547; 337.17982; 355.19039	7.79; 30.12; 14.02; 14.25; 17.55; 9.04; 11.00; 6.65; 6.63; 15.55; 7.36; 35.42; 42.05; 8.19; 13.94; 23.55; 40.67; 11.81; 7.34; 8.55; 34.58; 100.00; 6.64; 9.63; 10.63; 12.13; 23.32; 9.21; 12.92; 27.39; 27.14	41.03858; 91.05423; 103.05423; 105.06988; 111.08044; 117.06988; 119.08553; 121.10118; 125.05971; 129.06988; 131.08553; 133.10118; 135.04406; 145.10118; 147.04406; 149.05971; 151.07536; 157.10118; 159.11683; 161.13248; 171.04406; 173.05971; 175.07536; 177.09101; 229.12231; 237.09101; 241.12231; 245.15361; 251.10666; 265.12231; 327.19547	69.30; 73.85; 50.06; 59.26; 24.95; 78.25; 77.69; 31.44; 27.35; 30.26; 44.19; 28.17; 33.89; 37.65; 34.97; 100.00; 51.52; 35.75; 85.91; 62.14; 25.71; 60.57; 42.51; 23.80; 32.90; 88.36; 23.79; 26.47; 47.61; 24.07; 29.56
17	223.20564	222.1983654	C15H26O	CC1CCC2C13CCC(C(C3)C2(C)C)(C)O	522667	205.19508; 0.73014; 223.20564	100.00; 0.18206; 54.72	149.13248; 151.14813; 163.14813; 177.16378; 179.14304; 179.17943; 181.15869; 195.17434; 197.18999; 205.19508; 221.18999; 223.20564	9.51; 10.19; 13.95; 16.74; 12.70; 9.75; 16.51; 14.72; 21.85; 70.23; 40.03; 100.00	41.03858; 43.05423; 55.05423; 95.08553; 121.10118; 149.13248; 151.14813; 163.14813; 165.16378; 167.14304; 179.14304; 0.23625; 181.15869; 193.15869; 207.17434; 221.18999; 223.20564	100.00; 36.05; 10.50; 5.46; 5.77; 9.22; 4.90; 5.45; 5.15; 7.32; 11.69; 0.21711; 14.46; 5.70; 9.54; 50.78; 20.68
18	272.20089	271.1936144	C18H25NO	CC1C2CC3=C(C1(CCN2CC4CC4)C)C=C(C=C3)O	19143	55.05423; 272.20089	18.43; 100.00	55.05423; 173.09609; 175.11174; 218.15394; 254.19033; 270.18524; 272.20089	5.05; 7.92; 8.24; 8.46; 3.98; 13.67; 100.00	39.02293; 53.03858; 55.05423; 56.04948; 57.06988; 79.05423; 82.06513; 84.08078; 91.05423; 94.06513; 95.04914; 107.04914; 122.09643; 124.11208; 157.06479; 157.10118; 160.11208; 164.14338; 173.09609; 175.11174; 176.14338; 177.12739; 179.14304; 181.15869; 200.14338; 216.13829; 226.15903; 228.17468; 230.19033; 270.18524; 272.20089	27.35; 3.93; 100.00; 6.26; 2.83; 7.40; 2.64; 11.51; 8.47; 4.52; 4.51; 4.70; 13.55; 5.51; 5.06; 5.11; 8.86; 2.74; 7.00; 12.52; 2.94; 6.38; 3.34; 4.73; 3.51; 4.31; 4.39; 3.70; 3.05; 14.42; 3.26
19	341.03419	340.0269143	C16H14Cl2O4	CC(C(=O)OC)OC1=CC=C(C=C1)OC2=C(C=C(C=C2)Cl)Cl	39985	309.00798; 341.03419	100.00; 97.99	55.01784; 57.03349; 239.00250; 252.98176; 254.99741; 281.01306; 309.00798; 341.03419	7.77; 12.79; 9.18; 39.38; 100.00; 61.94; 20.86; 57.58	43.01784; 45.03349; 55.01784; 81.03349; 95.04914; 109.02841; 119.04914; 133.02841; 146.97628; 162.97120; 200.98685; 203.00250; 219.02073; 224.98685; 227.00250; 239.00250; 245.03638; 252.98176; 254.99741; 281.01306; 315.01854; 339.01854; 341.03419	7.54; 9.98; 13.72; 11.24; 25.86; 67.13; 7.90; 8.07; 13.65; 30.10; 9.32; 11.17; 100.00; 12.66; 14.99; 12.45; 9.25; 85.00; 75.79; 19.91; 12.81; 62.14; 15.10
20	415.1686	414.1613285	C22H26N2O4S	CC(=O)OC1C(SC2=CC=CC=C2N(C1=O)CCN(C)C)C3=CC=C(C=C3)OC	3076	72.08078; 370.11076; 415.16860	8.58; 16.07; 100.00	44.04948; 58.06513; 72.08078; 121.06479; 123.08044; 138.03720; 146.06004; 178.03211; 189.10224; 219.06519; 250.05324; 296.07398; 298.08963; 310.08963; 312.10528; 314.08454; 328.10019; 340.10019; 343.14748; 344.09511; 354.11584; 355.14748; 356.09511; 358.11076; 370.11076; 0.015622; 387.17369; 397.15804; 415.16860; 0.053369	11.59; 19.94; 95.55; 11.71; 13.76; 5.87; 21.58; 100.00; 9.36; 5.42; 4.90; 7.66; 29.37; 17.85; 8.02; 7.28; 4.54; 6.33; 4.71; 5.02; 7.43; 11.42; 21.42; 9.96; 92.29; 0.013737; 5.88; 4.95; 30.84; 0.01362	44.04948; 58.06513; 72.08078; 77.03858; 107.04914; 118.06513; 120.08078; 121.06479; 124.02155; 146.06004; 148.07569; 150.03720; 151.07536; 152.05285; 159.04406; 178.03211; 244.07906; 260.03759; 262.05324; 264.06889; 272.11036; 308.07398; 310.08963; 312.10528; 315.15256; 326.08454; 328.10019; 330.11584; 342.07946; 370.11076; 371.14239	32.86; 25.08; 100.00; 15.20; 28.55; 13.30; 12.37; 47.75; 11.74; 24.62; 19.46; 21.67; 27.26; 22.89; 15.68; 39.20; 14.08; 22.14; 23.84; 34.46; 22.51; 19.58; 43.75; 15.81; 12.16; 14.07; 24.66; 12.42; 18.61; 20.08; 17.28
21	417.37271	416.3654308	C28H48O2	CC1=C(C=C2CCC(OC2=C1C)(C)CCCC(C)CCCC(C)CCCC(C)C)O	14986	43.05423; 55.05423; 57.06988; 69.06988; 71.08553; 79.05423; 81.06988; 83.08553; 85.10118; 95.08553; 97.10118; 137.05971; 139.07536; 149.05971; 151.07536; 179.17943; 191.10666; 233.15361; 261.18491; 265.28898; 279.30463; 289.21621; 331.26316; 345.27881; 359.29446; 361.31011; 399.36214; 401.34141; 417.37271	11.78; 3.23; 8.72; 5.46; 11.16; 3.69; 2.51; 5.41; 5.53; 2.54; 6.97; 3.53; 2.85; 6.02; 23.07; 2.44; 37.79; 2.47; 3.36; 3.58; 3.64; 3.44; 4.74; 3.49; 7.94; 5.41; 6.25; 2.39; 100.00	41.03858; 43.05423; 55.05423; 57.06988; 69.06988; 71.08553; 79.05423; 81.06988; 83.08553; 97.06479; 97.10118; 99.11683; 107.04914; 109.06479; 121.06479; 123.08044; 125.13248; 133.06479; 135.04406; 137.05971; 149.05971; 151.07536; 179.17943; 191.10666; 191.17943; 193.19508; 249.25768; 251.27333; 331.26316; 399.36214; 415.35706	15.52; 23.86; 27.74; 63.82; 36.08; 26.47; 11.34; 12.99; 14.80; 12.28; 36.31; 11.76; 11.38; 18.51; 22.42; 16.06; 12.65; 26.15; 20.08; 31.40; 48.59; 100.00; 12.59; 15.01; 13.88; 20.69; 19.11; 11.14; 16.30; 38.28; 14.34	41.03858; 43.05423; 55.05423; 57.06988; 67.05423; 69.06988; 71.08553; 79.05423; 81.06988; 83.08553; 93.06988; 95.08553; 97.10118; 99.11683; 105.06988; 109.10118; 123.11683; 133.06479; 137.05971; 137.13248; 147.04406; 149.05971; 151.07536; 165.09101; 173.09609; 175.11174; 179.17943; 191.10666; 193.12231; 205.12231; 219.13796	51.00; 76.16; 100.00; 73.59; 11.91; 36.97; 13.64; 12.95; 49.21; 37.80; 34.10; 39.88; 52.44; 12.70; 10.43; 15.88; 8.31; 11.36; 8.91; 19.99; 12.32; 12.03; 29.89; 13.15; 23.65; 18.97; 8.21; 15.10; 8.32; 9.25; 8.09
22	238.09932	237.0920418	C13H16ClNO	CNC1(CCCCC1=O)C2=CC=CC=C2Cl	3821	207.05712; 238.09932	16.13; 100.00	95.04914; 119.06220; 125.01525; 137.01525; 152.02615; 154.04180; 165.04655; 170.07310; 179.06220; 182.07310; 189.04655; 191.06220; 192.05745; 193.07785; 194.07310; 196.08875; 207.05712; 208.08875; 209.07277; 210.10440; 220.08875; 236.08367; 238.09932	8.32; 8.43; 15.20; 10.26; 17.63; 57.56; 20.19; 9.55; 6.97; 11.29; 25.12; 20.23; 9.61; 11.80; 9.46; 16.11; 100.00; 9.47; 6.77; 9.78; 32.96; 10.56; 82.18	39.02293; 41.03858; 42.03383; 43.05423; 53.03858; 55.05423; 70.06513; 94.06513; 95.04914; 96.08078; 98.09643; 104.04948; 106.06513; 108.08078; 113.01525; 118.06513; 120.04439; 125.01525; 137.01525; 138.01050; 151.03090; 152.02615; 154.04180; 160.08875; 165.04655; 170.07310; 171.08044; 184.11208; 189.04655; 202.12264; 236.08367	18.32; 19.10; 61.18; 12.40; 11.97; 34.10; 19.41; 17.57; 19.58; 10.12; 11.87; 27.05; 18.03; 9.04; 15.89; 22.49; 17.02; 54.25; 31.47; 8.46; 11.84; 54.51; 100.00; 10.82; 8.46; 20.42; 12.65; 17.24; 13.48; 10.57; 19.84
23	207.0508	206.043522	C8H14O2S2	C1CSSC1CCCCC(=O)O	864	104.98272; 147.02967; 161.04532; 189.04023; 207.05080	6.59; 7.42; 10.06; 32.91; 100.00	41.03858; 43.05423; 55.05423; 95.08553; 97.10118; 99.02630; 101.04195; 103.05760; 113.04195; 115.05760; 118.99837; 127.05760; 159.02967; 161.04532; 171.02967; 189.04023	4.59; 7.02; 7.09; 13.66; 11.99; 6.56; 30.77; 15.07; 4.71; 4.99; 5.46; 47.32; 20.01; 100.00; 14.54; 11.37	46.99500; 58.99500; 73.01065; 85.01065; 87.02630; 99.02630; 101.04195; 101.05971; 111.02630; 111.04406; 115.07536; 125.04195; 125.05971; 127.05760; 129.03686; 129.09101; 139.07536; 147.04743; 155.05251; 159.04743; 161.06308; 173.06308	20.62; 5.35; 6.82; 4.41; 100.00; 6.21; 7.37; 6.17; 10.83; 28.30; 6.12; 22.66; 4.91; 6.80; 21.67; 6.32; 21.13; 17.14; 8.36; 7.37; 21.41; 11.24
24	404.23325	403.2259772	C25H29N3O2	CN1CC(CC2C1CC3=CN(C4=CC=CC2=C34)C)CNC(=O)OCC5=CC=CC=C5	4090	386.22269; 404.23325	18.12; 100.00	91.05423; 135.04406; 152.07060; 253.16993; 270.19647; 296.17574; 298.19139; 386.22269; 404.23325	24.23; 3.25; 4.06; 25.48; 9.57; 5.24; 8.03; 13.01; 100.00	91.05423; 97.10118; 99.11683; 107.04914; 109.06479; 115.11174; 144.08078; 170.09643; 172.11208; 213.13862; 222.12773; 224.14338; 226.15903; 237.13862; 239.15428; 241.16993; 243.18558; 249.13862; 253.16993; 255.18558; 268.18082; 270.19647; 388.20195; 404.23325	100.00; 13.61; 7.58; 10.94; 4.31; 4.34; 4.20; 4.64; 4.97; 5.49; 6.11; 18.52; 5.42; 19.99; 29.33; 10.74; 4.05; 11.14; 63.23; 20.99; 8.19; 5.78; 7.87; 11.68
25	156.17468	155.1673997	C10H21N	CC(CC1CCCCC1)NC	7558	83.08553; 97.10118; 99.11683; 156.17468	30.41; 19.36; 12.39; 100.00	55.05423; 58.06513; 72.08078; 83.08553; 85.10118; 97.10118; 125.13248; 156.17468	19.65; 16.09; 100.00; 82.00; 15.74; 54.59; 13.94; 14.45	41.03858; 55.05423; 56.04948; 57.06988; 58.06513; 81.06988; 83.08553; 97.10118	21.18; 65.89; 17.02; 12.69; 20.98; 35.24; 100.00; 46.09
26	303.25299	302.2457096	C17H34O4	CCCCCCCCCCCCCC(=O)OCC(CO)O	79050	43.05423; 55.05423; 57.06988; 71.08553; 75.04406; 83.08553; 85.10118; 93.05462; 97.10118; 99.11683; 109.10118; 123.11683; 125.09609; 137.13248; 151.14813; 165.16378; 193.19508; 211.20564; 229.21621; 267.23186; 285.24242; 303.25299	11.74; 4.60; 17.98; 11.91; 10.00; 3.70; 10.44; 3.29; 5.94; 4.29; 7.00; 10.68; 4.01; 15.88; 5.01; 6.43; 7.39; 57.99; 7.21; 7.80; 76.24; 100.00	41.03858; 43.05423; 55.05423; 57.03349; 57.06988; 69.06988; 71.08553; 75.04406; 83.08553; 85.10118; 93.05462; 95.08553; 97.10118; 99.11683; 109.10118; 111.11683; 123.11683; 125.09609; 125.13248; 127.14813; 137.13248; 139.14813; 151.14813; 165.16378; 193.19508; 209.18999; 211.20564; 227.20056; 267.23186; 285.24242; 303.25299	11.91; 29.26; 21.13; 20.12; 36.83; 13.84; 44.82; 100.00; 14.52; 22.33; 20.69; 20.70; 26.44; 13.27; 16.56; 11.42; 23.54; 9.67; 9.97; 10.28; 19.37; 14.93; 11.90; 21.29; 9.46; 12.65; 60.68; 9.80; 25.53; 79.01; 36.94	41.03858; 43.05423; 45.03349; 55.05423; 57.06988; 59.04914; 61.02841; 69.06988; 71.08553; 75.04406; 81.06988; 83.08553; 85.10118; 95.08553; 97.10118; 109.10118	30.16; 96.66; 12.70; 44.42; 100.00; 9.73; 16.98; 26.04; 41.94; 15.43; 13.59; 9.99; 7.26; 20.10; 8.49; 9.32
27	165.09101	164.0837296	C10H12O2	CC(C1=CC=CC=C1)OC(=O)C	62341	105.06988; 123.08044	100.00; 5.09	79.05423; 105.06988	23.60; 100.00	43.01784; 77.03858; 79.05423; 89.03858; 101.03858; 103.05423; 105.06988	87.65; 60.06; 86.05; 19.46; 25.80; 84.50; 100.00
28	167.10666	166.0993797	C10H14O2	CC1(C2CCC1(C(=O)C2=O)C)C	25208	109.10118; 141.09101; 149.09609; 167.10666	8.87; 9.48; 18.82; 100.00	69.06988; 81.06988; 83.08553; 91.05423; 93.06988; 107.08553; 109.10118; 111.11683; 139.11174; 149.09609; 167.10666	21.24; 26.12; 13.89; 25.15; 17.36; 67.74; 100.00; 90.34; 57.20; 21.60; 95.12	41.03858; 55.05423; 67.05423; 69.06988; 79.05423; 81.06988; 91.05423; 93.06988; 95.08553; 107.08553; 109.10118; 111.11683; 151.07536; 167.10666	29.31; 24.80; 36.28; 42.55; 33.31; 42.71; 75.47; 41.13; 36.15; 79.09; 100.00; 31.32; 31.02; 47.12
29	455.29043	454.2831577	C27H38N2O4	CC(C)C(CCCN(C)CCC1=CC(=C(C=C1)OC)OC)(C#N)C2=CC(=C(C=C2)OC)OC	2520	151.07536; 165.09101; 246.14886; 260.16451; 423.26422; 428.27954; 455.29043	2.32; 2.01; 3.14; 3.15; 7.99; 5.90; 100.00	43.05423; 80.04948; 82.06513; 94.06513; 96.08078; 98.09643; 137.05971; 151.07536; 165.09101; 193.12231; 206.11756; 207.13796; 208.13321; 218.11756; 220.13321; 221.15361; 234.14886; 264.19581; 287.17540; 288.19581; 289.19105; 292.22711; 395.23292; 397.24857; 411.26422; 413.24348; 423.26422; 424.24823; 426.26389; 428.27954; 455.29043	11.07; 7.72; 8.99; 29.57; 15.91; 13.61; 11.01; 9.48; 48.54; 34.72; 9.07; 10.88; 11.39; 14.61; 12.41; 12.45; 13.18; 7.92; 7.78; 14.82; 10.27; 10.66; 8.55; 10.01; 8.92; 12.66; 32.48; 8.28; 15.97; 8.22; 100.00	57.03349; 59.04914; 72.08078; 108.08078; 133.06479; 135.08044; 137.05971; 149.10732; 151.07536; 153.13862; 165.09101; 204.10191; 208.13321; 218.11756; 221.15361; 232.13321; 247.14410; 264.19581; 271.14410; 273.15975; 275.17540; 288.19581; 292.22711; 303.20670; 311.17540; 317.22235; 325.19105; 411.26422; 426.26389; 453.27478; 455.29043	4.71; 4.62; 4.59; 4.54; 6.58; 6.15; 5.28; 5.55; 26.00; 6.09; 100.00; 16.67; 22.11; 4.72; 4.86; 13.08; 5.89; 11.16; 11.49; 7.27; 14.44; 5.11; 6.23; 6.03; 5.26; 4.58; 5.57; 6.44; 7.20; 10.81; 9.29
30	207.17434	206.1670653	C14H22O	CC(C)(C)CC(C)(C)C1=CC=CC=C1O	62530	55.05423; 57.06988; 71.08553; 95.04914; 111.11683; 135.08044; 207.17434	34.60; 27.19; 35.81; 47.86; 18.72; 18.50; 100.00	55.05423; 57.06988; 65.03858; 95.04914; 95.08553; 97.10118	100.00; 26.32; 14.13; 27.06; 46.22; 36.88	39.02293; 41.03858; 51.02293; 53.03858; 55.05423; 57.06988; 65.03858; 67.05423; 79.05423; 95.04914; 95.08553; 97.10118; 105.06988; 107.08553; 117.06988; 119.04914; 121.10118; 133.06479; 133.10118; 145.10118; 173.13248; 205.15869	39.23; 59.73; 27.09; 13.62; 95.00; 31.29; 100.00; 17.73; 17.38; 21.92; 73.26; 16.99; 25.79; 28.33; 42.80; 45.59; 17.90; 26.96; 29.89; 13.69; 20.38; 24.71
31	117.10224	116.094963	C5H12N2O	CC(C)(C)NC(=O)N	14233	57.06988; 74.09643	100.00; 99.51	44.01309; 57.06988; 58.06513; 61.03964	22.92; 100.00; 16.10; 20.42	41.03858; 57.06988	23.00; 100.00
32	339.32576	338.3184806	C22H42O2	CCCCCCCCC=CCCCCCCCCCCCC(=O)O	8216	43.05423; 55.05423; 57.06988; 69.06988; 71.04914; 71.08553; 81.06988; 83.08553; 89.05971; 95.08553; 97.10118; 101.05971; 103.07536; 109.10118; 115.07536; 123.11683; 125.13248; 137.13248; 151.14813; 207.21073; 209.22638; 211.16926; 213.18491; 223.24203; 225.18491; 275.27333; 279.30463; 293.32028; 303.30463; 321.31519; 339.32576	2.32; 6.07; 5.32; 6.01; 2.64; 2.49; 3.90; 4.63; 4.13; 2.78; 3.68; 2.36; 2.87; 5.25; 1.88; 2.07; 5.86; 2.65; 2.36; 2.31; 4.68; 2.62; 4.25; 3.81; 1.86; 3.30; 3.65; 3.57; 18.43; 54.00; 100.00	55.05423; 57.06988; 69.06988; 71.04914; 71.08553; 75.04406; 81.06988; 83.08553; 85.06479; 95.08553; 97.10118; 109.10118; 123.11683; 125.13248; 137.13248; 139.14813; 195.21073; 207.21073; 209.22638; 221.22638; 223.24203; 235.24203; 237.25768; 249.25768; 251.27333; 265.28898; 279.30463; 293.32028; 303.30463; 321.31519; 339.32576	54.27; 29.72; 52.42; 17.76; 17.93; 18.88; 20.76; 30.61; 17.07; 22.46; 25.82; 42.39; 39.58; 17.65; 17.33; 14.67; 13.44; 17.93; 19.97; 14.37; 17.81; 18.49; 15.67; 18.28; 14.99; 17.43; 16.19; 16.36; 50.52; 99.64; 100.00	41.03858; 43.05423; 55.01784; 55.05423; 57.03349; 57.06988; 67.05423; 69.06988; 71.08553; 79.05423; 81.06988; 83.08553; 93.06988; 95.08553; 97.10118; 107.08553; 109.10118; 121.10118; 123.08044; 123.11683; 151.14813; 197.15361; 197.22638; 225.18491; 253.21621; 267.23186	51.74; 61.24; 5.93; 100.00; 7.54; 79.19; 27.93; 60.60; 23.53; 22.49; 53.11; 29.46; 38.69; 51.81; 18.29; 16.18; 35.42; 8.56; 5.51; 12.04; 5.72; 7.88; 7.75; 7.34; 8.65; 7.73
33	205.12231	204.1150297	C13H16O2	C1CCC(CC1)(C(=O)C2=CC=CC=C2)O	70355	99.08044; 187.11174; 205.12231	9.13; 29.65; 100.00	55.05423; 79.05423; 81.06988; 83.08553; 91.05423; 99.08044; 105.03349; 131.04914; 133.06479; 149.05971; 169.10118; 187.11174; 203.10666; 205.12231	17.52; 19.01; 64.91; 6.40; 11.63; 13.87; 26.12; 7.43; 13.07; 13.52; 15.29; 100.00; 13.97; 11.58	41.03858; 51.02293; 55.05423; 77.03858; 79.05423; 81.06988; 83.08553; 91.05423; 93.06988; 105.03349; 121.06479; 129.03349; 139.07536; 169.10118; 177.09101; 179.10666; 187.11174	11.59; 9.35; 12.27; 49.71; 75.90; 6.96; 100.00; 18.91; 12.11; 18.85; 6.56; 6.69; 7.13; 43.20; 10.44; 6.86; 10.67
34	157.15869	156.1514153	C10H20O	CC1CCC(C(C1)O)C(C)C	1254	43.05423; 69.06988; 83.08553; 95.08553; 97.10118; 99.11683; 113.09609; 115.11174; 139.14813; 157.15869	19.80; 16.64; 23.89; 69.85; 100.00; 15.22; 48.78; 23.55; 43.95; 21.89	41.03858; 43.05423; 55.05423; 57.06988; 69.06988; 71.08553; 81.06988; 83.08553; 85.10118; 95.08553; 97.10118; 101.09609; 113.09609; 139.14813; 157.15869	20.67; 60.62; 61.21; 59.63; 71.90; 39.41; 18.61; 100.00; 34.09; 43.51; 57.08; 25.30; 20.46; 40.84; 36.82	41.03858; 43.05423; 55.05423; 57.06988; 67.05423; 69.06988; 81.06988; 83.08553; 95.08553	55.10; 100.00; 66.53; 17.21; 21.39; 39.74; 28.56; 21.34; 20.91
35	143.14304	142.1357652	C9H18O	CC1CC(CC(C1)(C)C)O	8298	41.03858; 43.05423; 55.05423; 57.06988; 69.06988; 83.08553; 85.10118; 87.08044; 99.11683; 101.09609; 103.11174; 125.13248; 143.14304	16.82; 47.14; 38.74; 66.21; 41.64; 36.50; 13.51; 49.17; 15.26; 18.25; 22.06; 29.06; 100.00	41.03858; 43.05423; 55.05423; 57.06988; 69.06988; 81.06988; 83.08553; 85.10118; 97.10118; 109.10118; 125.13248	28.05; 25.46; 100.00; 78.90; 31.22; 19.11; 28.93; 13.67; 13.19; 57.61; 49.60	41.03858; 43.05423; 55.05423; 57.06988; 67.05423; 69.06988; 81.06988; 83.08553	54.74; 37.98; 100.00; 52.70; 53.11; 45.01; 53.48; 35.86
36	136.11208	135.1047994	C9H13N	CCC(C1=CC=CC=C1)N	18054	91.05423; 136.11208	44.50; 100.00	58.06513; 79.05423; 91.05423; 106.06513; 119.08553; 136.11208	6.52; 10.35; 100.00; 9.18; 25.94; 11.59	65.03858; 77.03858; 79.05423; 91.05423; 93.06988; 134.09643	18.79; 100.00; 68.85; 82.24; 19.47; 8.53
37	384.14416	383.1368874	C21H21NO6	CN1CCC2=CC3=C(C=C2C1C4C5=C(C(=C(C=C5)OC)OC)C(=O)O4)OCO3	1309	190.08626; 384.14416	8.26; 100.00	161.05971; 162.09134; 188.07060; 190.08626; 353.10196; 354.13360; 366.13360; 384.14416; 0.21681	6.77; 5.59; 5.42; 62.35; 33.64; 20.21; 6.82; 100.00; 0.17177	44.04948; 144.08078; 147.04406; 149.05971; 160.07569; 161.05971; 162.09134; 176.07060; 178.08626; 180.10191; 188.07060; 190.08626; 204.10191; 207.06519; 298.10738; 311.09140; 325.07066; 336.12303; 338.10230; 338.13868; 339.08631; 340.11795; 341.10196; 352.11795; 353.10196; 354.13360; 0.26935; 356.14925; 366.13360; 368.11286; 382.12851; 384.14416	29.74; 16.11; 27.93; 18.33; 14.51; 23.15; 58.75; 15.98; 22.42; 14.39; 18.38; 100.00; 17.57; 14.93; 37.98; 16.75; 14.09; 19.12; 19.16; 23.92; 27.25; 36.72; 25.89; 15.56; 21.25; 24.85; 0.1759; 17.44; 16.99; 21.75; 14.42; 13.34
38	424.13506	423.1277793	C18H21N3O9	C=CC(=O)OCCN1C(=O)N(C(=O)N(C1=O)CCOC(=O)C=C)CCOC(=O)C=C	170286	296.08771; 352.11393; 370.12449; 424.13506	7.07; 13.01; 30.53; 100.00	254.07715; 256.09280; 278.07715; 280.09280; 282.10845; 296.08771; 298.10336; 300.11901; 316.11393; 352.11393; 370.12449; 424.13506	12.82; 15.13; 17.92; 67.19; 68.26; 29.91; 100.00; 23.61; 15.02; 23.90; 27.00; 28.55	142.04987; 213.08698; 255.09755; 280.09280; 282.10845; 284.12410; 285.10811; 296.08771; 298.10336; 300.11901; 313.10303; 314.09828; 316.11393; 348.08263; 366.09319; 370.12449	8.21; 12.87; 36.06; 41.23; 18.79; 8.33; 8.03; 28.70; 100.00; 51.87; 9.92; 56.42; 45.35; 7.86; 8.51; 10.40
39	185.98718	184.9799046	C8H5Cl2N	C1=CC(=C(C=C1Cl)Cl)CC#N	80566	40.01818; 185.98718	7.33; 100.00	158.97628; 185.98718	100.00; 32.43	40.01818; 51.02293; 60.98395; 98.99960; 100.01818; 108.98395; 132.96063; 133.97920; 135.99485; 150.01050; 158.97628	5.17; 3.83; 4.08; 7.06; 5.88; 6.41; 8.78; 6.93; 4.39; 9.11; 100.00
40	557.43128	556.4240083	C34H56N2O4	CCC(=O)OC1C(CC2C1(CCC3C2CCC4C3(CC(C(C4)OC(=O)C)N5CCCCC5)C)C)N6CCCCC6	76007664	497.41016; 557.43128	10.13; 100.00	84.08078; 86.09643; 264.19581; 288.19581; 290.21146; 292.22711; 398.30536; 400.32101; 412.32101; 416.31592; 423.37338; 425.38903; 439.36829; 441.38394; 443.39959; 459.39451; 467.36321; 472.34214; 483.39451; 485.41016; 497.41016; 499.38942; 501.40507; 0.082107; 539.42072; 557.43128	27.09; 57.57; 5.53; 7.41; 10.80; 7.61; 47.20; 44.77; 9.93; 23.98; 30.13; 8.22; 19.36; 12.12; 10.29; 7.74; 9.77; 8.95; 25.99; 25.38; 18.56; 7.34; 66.39; 0.075898; 12.38; 100.00	43.05423; 56.04948; 58.06513; 67.05423; 68.04948; 70.06513; 82.06513; 84.08078; 86.09643; 96.08078; 98.09643; 110.09643; 112.11208; 124.11208; 178.15903; 192.17468; 202.15903; 228.17468; 230.19033; 236.16451; 250.18016; 266.21146; 268.22711; 292.22711; 306.24276; 360.28971; 398.30536; 446.32649; 448.34214; 481.37886; 557.43128; 0.00037399	9.32; 46.35; 15.19; 12.28; 11.25; 21.52; 22.05; 100.00; 39.04; 11.57; 33.93; 17.14; 34.90; 9.38; 19.22; 42.19; 21.92; 20.08; 10.13; 10.19; 9.89; 34.11; 14.42; 25.11; 24.44; 11.83; 13.71; 21.53; 16.20; 9.70; 10.50; 0.00023112
41	267.19547	266.1881947	C16H26O3	CCCCCCCCCC=CCC1CC(=O)OC1=O	29772	39.02293; 55.05423; 67.05423; 79.05423; 81.06988; 83.08553; 93.06988; 95.08553; 107.08553; 121.10118; 123.11683; 127.03897; 129.05462; 139.14813; 141.05462; 149.13248; 151.14813; 165.16378; 167.17943; 249.18491; 267.19547	3.06; 3.70; 4.44; 12.18; 16.56; 2.79; 9.46; 12.26; 2.85; 3.39; 3.23; 4.50; 7.42; 2.94; 3.07; 9.58; 5.90; 3.17; 3.76; 15.23; 100.00	41.03858; 43.05423; 55.05423; 57.06988; 67.05423; 69.06988; 71.08553; 79.05423; 81.03349; 81.06988; 83.08553; 93.06988; 95.08553; 111.04406; 123.11683; 127.03897; 129.05462; 139.03897; 149.13248; 205.15869; 207.17434; 219.17434; 221.15361; 221.18999; 223.16926; 223.20564; 225.18491; 235.16926; 239.20056; 249.18491; 267.19547	9.30; 13.67; 25.97; 11.51; 12.72; 15.24; 10.45; 22.92; 12.10; 48.42; 8.00; 24.79; 56.01; 12.81; 9.10; 11.14; 16.90; 23.60; 8.33; 91.12; 38.46; 17.24; 21.03; 36.49; 14.99; 13.11; 27.37; 9.42; 33.62; 50.01; 100.00	39.02293; 41.03858; 43.05423; 53.03858; 55.01784; 55.05423; 57.06988; 65.03858; 67.05423; 69.03349; 69.06988; 71.08553; 79.05423; 81.03349; 81.06988; 93.06988; 95.04914; 95.08553; 97.02841; 99.00767; 101.02332; 103.03897; 121.02841; 127.03897; 139.03897; 153.05462	9.08; 42.66; 100.00; 25.40; 12.82; 53.88; 46.90; 6.82; 27.58; 6.11; 13.07; 6.58; 31.31; 6.29; 98.54; 32.50; 7.20; 94.69; 8.22; 10.22; 8.31; 4.87; 5.76; 5.70; 11.07; 5.50
42	124.99193	123.9846556	C4H6Cl2	C(C=CCCl)Cl	15122	89.01525; 124.99193	60.05; 100.00	53.03858; 62.99960; 89.01525; 124.99193	18.05; 33.42; 100.00; 21.12	39.02293; 53.03858	100.00; 92.05
43	244.88073	243.87345	C4H6Br2O2	C(C(=C(CO)Br)Br)O	18603	124.95965; 244.88073	19.52; 100.00	104.93344; 106.94909; 124.95965; 208.85960; 226.87017	29.80; 100.00; 38.46; 41.43; 75.48	106.94909; 124.95965; 132.92835; 134.94400; 136.95965; 146.94400; 164.95457; 196.85960; 198.87525; 208.85960; 216.88582; 226.87017	100.00; 13.95; 17.95; 40.00; 15.10; 54.77; 30.68; 22.59; 18.52; 37.28; 16.44; 46.71
44	173.08083	172.0735589	C8H12O4	CCOC(=O)C=CC(=O)OCC	12201	41.00219; 80.99711; 83.01276; 85.02841; 87.04406; 99.04406; 101.02332; 127.03897; 129.05462; 131.07027; 173.08084	10.69; 22.44; 23.79; 37.13; 10.07; 34.74; 30.83; 100.00; 18.42; 11.58; 21.81	29.03858; 41.00219; 47.04914; 53.00219; 55.01784; 57.03349; 71.01276; 71.04914; 73.02841; 80.99711; 83.01276; 87.08044; 89.05971; 99.00767; 99.04406; 101.05971; 109.02841; 113.05971; 127.03897	13.01; 42.02; 87.18; 28.42; 100.00; 22.81; 30.23; 17.33; 61.17; 14.94; 13.86; 13.31; 13.44; 29.03; 97.37; 15.93; 25.90; 18.18; 48.56	41.00219; 43.01784; 44.99711; 47.04914; 53.00219; 55.01784; 57.03349; 59.01276; 59.04914; 68.99711; 71.01276; 71.04914; 73.02841; 99.00767; 99.04406; 127.03897	16.42; 92.15; 19.91; 20.75; 38.40; 65.08; 35.44; 33.30; 33.61; 18.18; 64.59; 26.21; 100.00; 17.63; 32.74; 16.13
45	155.14304	154.1357652	C10H18O	CCCCCCCC=CC=O	19801	39.02293; 41.03858; 43.05423; 55.05423; 57.03349; 57.06988; 67.05423; 69.06988; 71.08553; 79.05423; 81.06988; 83.08553; 93.06988; 95.08553	15.28; 27.55; 26.64; 100.00; 16.13; 36.84; 56.43; 96.00; 15.28; 19.38; 59.26; 19.73; 17.94; 49.53	39.02293; 41.03858; 43.05423; 53.03858; 55.05423; 57.03349; 57.06988; 67.05423; 69.06988; 71.08553; 79.05423; 81.06988; 83.08553; 95.08553	25.41; 42.63; 32.71; 38.65; 100.00; 55.12; 39.95; 74.65; 79.33; 24.25; 21.06; 42.65; 23.29; 27.32	41.03858; 43.01784; 43.05423; 55.05423; 57.06988; 65.03858; 67.05423; 69.06988; 79.05423; 81.06988; 93.06988	85.09; 42.42; 69.06; 100.00; 34.98; 31.26; 60.73; 43.13; 48.20; 46.53; 45.43
46	99.08044	98.07316494	C6H10O	CCCC=CC=O	10460	39.02293; 41.03858; 55.05423; 65.03858; 69.06988; 71.08553; 81.06988	51.87; 25.73; 69.73; 14.97; 19.36; 14.67; 100.00	39.02293; 41.03858; 53.03858; 55.05423; 57.03349; 81.06988	100.00; 36.24; 21.03; 50.90; 17.85; 40.07	39.02293; 41.03858; 53.03858; 55.05423; 79.05423; 81.06988	88.28; 50.88; 48.24; 84.24; 100.00; 42.49
47	191.10666	190.0993797	C12H14O2	CCC(=O)OCC=CC1=CC=CC=C1	7661	91.05423; 117.06988	20.95; 100.00	91.05423; 103.05423; 115.05423; 117.06988; 133.06479	100.00; 61.45; 52.45; 98.55; 69.81	65.03858; 77.03858; 89.03858; 91.05423; 103.05423; 115.05423; 117.06988	12.28; 8.67; 15.25; 100.00; 7.82; 36.73; 69.23
48	133.06479	132.0575149	C9H8O	C1=CC=C(C=C1)C=CC=O	307	91.05423; 115.05423; 133.06479	50.79; 80.60; 100.00	77.03858; 79.05423; 91.05423; 103.05423; 105.06988; 115.05423	32.70; 16.80; 46.93; 100.00; 26.90; 45.45	63.02293; 65.03858; 75.02293; 77.03858; 89.03858; 91.05423; 103.05423; 115.05423	25.84; 100.00; 54.09; 91.51; 68.05; 54.15; 92.11; 25.99
49	157.12231	156.1150297	C9H16O2	CCCCCC(C=CC=O)O	1693	41.03858; 43.05423; 55.01784; 57.03349; 69.06988; 71.04914; 71.08553; 81.06988; 83.04914; 83.08553; 85.06479; 93.06988; 95.08553; 97.06479; 97.10118; 99.08044; 107.08553; 109.10118; 111.08044; 113.09609; 115.11174; 121.10118; 139.11174; 157.12231	49.61; 48.68; 28.93; 51.02; 97.18; 34.91; 66.67; 30.10; 37.79; 30.54; 25.66; 100.00; 84.68; 31.05; 46.06; 24.90; 38.89; 35.82; 40.32; 35.00; 36.98; 35.42; 84.60; 40.57	39.02293; 41.03858; 43.05423; 55.05423; 57.03349; 57.06988; 67.05423; 69.03349; 69.06988; 71.04914; 71.08553; 79.05423; 81.06988; 83.04914; 83.08553; 93.06988; 95.08553; 97.06479; 121.10118	25.03; 66.45; 57.68; 25.15; 69.43; 21.21; 19.83; 37.72; 47.81; 21.00; 100.00; 68.64; 33.50; 20.66; 27.28; 33.69; 19.27; 34.03; 27.81	39.02293; 41.03858; 43.01784; 43.05423; 45.03349; 55.01784; 57.03349; 57.06988; 67.05423; 69.03349; 69.06988; 71.04914; 79.05423; 81.06988; 83.04914; 93.06988; 121.10118	16.89; 49.80; 28.08; 100.00; 13.13; 9.51; 27.66; 12.06; 29.72; 25.31; 18.34; 18.91; 40.83; 10.30; 30.82; 31.50; 11.21
50	97.06479	96.05751487	C6H8O	CC=CC=CC=O	8901	53.03858; 63.02293; 67.05423; 69.06988; 77.03858; 79.05423; 97.06479	12.29; 16.39; 28.32; 16.07; 10.65; 100.00; 11.65	39.02293; 51.02293; 53.03858; 77.03858; 79.05423	32.92; 35.37; 100.00; 37.17; 79.19	39.02293; 41.03858; 51.02293; 53.03858; 67.05423; 77.03858	73.01; 61.72; 92.21; 37.55; 100.00; 40.36
51	99.08044	98.07316494	C6H10O	CC=CC=CCO	8104	41.03858; 55.05423; 65.03858; 67.05423; 81.06988	13.90; 22.19; 16.95; 23.21; 100.00	39.02293; 41.03858; 53.03858; 55.05423; 81.06988	64.24; 44.82; 25.03; 100.00; 49.48	39.02293; 41.03858; 55.05423; 65.03858; 67.05423; 79.05423	69.41; 61.83; 73.45; 100.00; 56.62; 62.60
52	213.18491	212.17763	C13H24O2	CCC=CCCC=CC(OCC)OCC	105533	47.04914; 55.05423; 69.06988; 71.04914; 79.05423; 81.06988; 83.04914; 83.08553; 95.08553; 97.10118; 99.08044; 99.11683; 109.10118; 121.10118; 123.11683; 139.11174; 167.14304; 213.18491	15.14; 21.70; 10.27; 11.75; 19.12; 10.35; 14.25; 17.88; 29.19; 17.61; 14.06; 7.96; 18.08; 61.07; 96.37; 25.53; 100.00; 61.59	41.03858; 47.04914; 55.05423; 65.03858; 67.05423; 69.06988; 71.04914; 71.08553; 79.05423; 81.06988; 83.04914; 83.08553; 85.06479; 93.06988; 95.08553; 109.10118; 121.10118; 123.11683; 139.11174; 167.14304	8.70; 8.10; 52.57; 7.85; 12.08; 17.97; 6.58; 9.09; 15.63; 30.02; 10.22; 15.91; 10.44; 12.20; 14.32; 9.58; 44.67; 100.00; 6.67; 19.05	41.03858; 43.05423; 47.04914; 53.03858; 55.05423; 57.03349; 59.04914; 65.03858; 67.05423; 69.06988; 71.04914; 73.06479; 79.05423; 81.03349; 81.06988; 83.04914; 89.05971; 93.06988; 95.08553; 97.06479; 99.08044; 113.09609; 121.10118	38.44; 13.33; 14.97; 13.30; 100.00; 10.76; 10.18; 13.65; 40.38; 21.11; 18.06; 12.60; 26.07; 8.28; 29.30; 19.85; 12.94; 20.04; 14.42; 10.18; 8.50; 18.73; 12.61
53	167.07027	166.0629942	C9H10O3	CC1=CC=CC=C1OCC(=O)O	74651	43.01784; 107.04914; 149.05971; 167.07027	8.03; 18.32; 9.95; 100.00	41.00219; 59.01276; 79.05423; 91.05423; 93.06988; 107.04914; 121.06479	43.29; 39.99; 41.86; 100.00; 39.32; 87.95; 38.48	65.03858; 77.03858; 79.05423; 91.05423	24.35; 14.92; 12.81; 100.00
54	187.16926	186.1619799	C11H22O2	CCCCCCC(CCC)C(=O)O	552716	41.03858; 43.05423; 55.05423; 57.06988; 69.06988; 71.08553; 83.08553; 85.10118; 87.11683; 99.08044; 103.07536; 117.09101; 187.16926	14.90; 100.00; 22.55; 22.07; 20.89; 61.53; 20.15; 45.65; 12.33; 41.26; 13.87; 24.40; 41.36	41.03858; 43.05423; 55.05423; 57.06988; 69.06988; 71.08553; 73.10118; 83.08553; 85.06479; 85.10118; 87.08044; 97.10118; 111.11683; 141.16378	23.05; 100.00; 53.50; 42.81; 32.67; 60.93; 9.47; 27.19; 13.04; 25.60; 10.29; 10.79; 8.94; 9.45	41.03858; 43.05423; 55.05423; 57.06988; 69.06988; 71.08553; 101.05971	23.32; 82.12; 100.00; 48.30; 26.83; 11.70; 8.71
55	182.97803	181.970751	C4H6O4S2	C(C(C(=O)O)S)(C(=O)O)S	9354	90.98483; 136.97255; 164.96746; 182.97803	13.83; 27.31; 35.47; 100.00	46.99500; 72.97426; 74.98991; 90.96707; 90.98483; 93.00048; 102.98483; 136.97255; 138.98820; 182.97803	35.16; 23.35; 41.01; 35.22; 100.00; 27.60; 28.31; 89.98; 24.12; 70.55	44.97935; 46.99500; 74.98991; 77.00556	29.11; 100.00; 33.43; 30.29
56	196.11795	195.1106726	C7H17NO5	CNCC(C(C(C(CO)O)O)O)O	4049	56.04948; 74.06004; 86.06004; 104.07060; 160.09682; 178.10738; 196.11795	10.03; 37.97; 48.96; 48.76; 80.84; 82.60; 100.00	43.01784; 44.04948; 56.04948; 58.06513; 61.02841; 73.02841; 74.06004; 76.07569; 86.06004; 88.07569; 104.07060	13.52; 22.99; 12.15; 18.56; 37.43; 14.25; 35.62; 10.09; 100.00; 19.89; 31.76	43.01784; 44.04948; 56.04948; 58.06513; 61.02841; 75.04406; 88.07569	13.92; 100.00; 36.87; 30.56; 18.12; 12.80; 19.03
57	155.14304	154.1357652	C10H18O	CC1CCC(C(=O)C1)C(C)C	6986	43.05423; 67.05423; 69.06988; 81.06988; 83.08553; 95.08553; 97.10118; 109.10118; 111.11683; 113.09609; 137.13248; 155.14304	9.34; 14.40; 14.41; 34.57; 13.73; 18.20; 10.16; 14.50; 10.96; 15.47; 100.00; 18.13	41.03858; 43.05423; 55.05423; 57.06988; 67.05423; 69.06988; 71.08553; 81.06988; 83.08553; 85.10118; 93.06988; 95.08553; 97.10118; 99.08044; 115.11174; 121.10118; 137.13248; 155.14304	28.81; 55.85; 77.62; 31.81; 30.41; 72.56; 64.16; 100.00; 64.41; 27.64; 52.47; 90.65; 41.79; 22.84; 33.37; 44.00; 77.80; 24.42	41.03858; 43.01784; 43.05423; 55.05423; 67.05423; 69.06988; 71.08553; 79.05423; 81.06988; 83.08553; 93.06988; 95.08553	89.86; 24.94; 54.48; 96.67; 46.70; 50.94; 28.36; 30.88; 71.72; 27.12; 100.00; 43.57
58	304.26349	303.2562147	C20H33NO	CC1CN(CC(O1)C)CC(C)CC2=CC=C(C=C2)C(C)(C)C	91695	57.06988; 189.16378; 248.20089; 276.23219; 304.26349	3.51; 14.89; 6.53; 6.17; 100.00	41.03858; 43.01784; 55.05423; 57.06988; 70.06513; 91.05423; 116.10699; 119.08553; 128.10699; 133.10118; 147.11683; 189.16378; 204.17468; 218.19033; 232.20598; 246.18524; 246.22163; 248.20089; 258.22163; 260.23728; 262.21654; 276.23219; 278.24784; 286.25293; 288.23219; 302.24784; 304.26349	36.31; 14.22; 13.57; 36.03; 12.50; 11.08; 11.88; 10.82; 18.69; 35.73; 22.88; 59.57; 53.71; 46.03; 13.90; 15.69; 79.23; 18.11; 25.15; 18.33; 11.82; 17.67; 23.11; 14.66; 19.36; 11.52; 100.00	41.03858; 55.05423; 57.06988; 70.06513; 84.08078; 91.05423; 105.06988; 107.08553; 109.10118; 117.06988; 119.08553; 121.10118; 124.07569; 131.08553; 133.10118; 135.11683; 147.11683; 161.13248; 173.13248; 186.12773; 187.14813; 189.16378; 202.15903; 204.17468; 208.16959; 218.15394; 218.19033; 232.16959; 244.20598; 278.24784; 288.23219	100.00; 44.72; 20.90; 8.08; 24.50; 9.47; 25.87; 33.98; 19.21; 12.17; 16.80; 9.33; 20.77; 12.24; 23.79; 8.42; 26.35; 11.25; 22.55; 7.35; 14.64; 33.96; 12.36; 9.21; 7.71; 16.76; 11.93; 7.30; 11.74; 8.04; 12.05
59	302.08454	301.0772645	C16H15NO3S	COC1=CC=C(C=C1)C2C(C(=O)NC3=CC=CC=C3S2)O	3260419	274.08963; 302.08454	3.34; 100.00	94.06513; 121.06479; 124.02155; 126.03720; 152.01646; 194.02703; 196.04268; 244.07906; 274.08963; 284.07398; 302.08454	8.36; 7.71; 12.83; 9.43; 10.14; 20.99; 9.83; 7.15; 8.56; 8.62; 100.00	71.01276; 77.03858; 79.05423; 80.04948; 91.05423; 93.06988; 94.06513; 97.01065; 107.04914; 109.01065; 111.02630; 120.04439; 121.06479; 123.08044; 124.02155; 126.03720; 133.06479; 138.03720; 150.00081; 152.01646; 153.03686; 159.04406; 178.03211; 183.04743; 194.02703; 229.06816; 244.07906; 258.05833; 274.08963; 300.06889; 302.08454	9.51; 16.80; 27.28; 10.44; 22.02; 14.37; 24.47; 12.29; 16.72; 7.61; 6.63; 9.74; 97.20; 9.10; 100.00; 12.23; 9.73; 10.67; 6.75; 9.87; 11.85; 10.10; 15.22; 9.98; 11.41; 7.94; 8.95; 8.89; 6.78; 14.02; 9.96
60	266.08454	265.0772645	C13H15NO3S	CCC(C)C(C(=O)O)N1C(=O)C2=CC=CC=C2S1	17892662	152.01646; 266.08454; 0.0057268	100.00; 71.35; 0.0047069	69.06988; 124.02155; 152.01646; 154.03211; 156.04776; 0.011372; 248.07398	99.27; 16.80; 100.00; 16.12; 45.82; 0.010406; 29.98	51.02293; 67.05423; 69.06988; 79.05423; 97.06479; 105.03349; 111.02630; 121.01065; 124.02155; 137.00556; 141.03686; 150.00081; 152.01646	8.08; 10.28; 100.00; 50.12; 8.64; 30.28; 44.36; 7.43; 42.16; 31.53; 8.54; 24.77; 41.26
61	277.99968	276.9924046	C8H8ClN3O4S	CON=C(C1=CSC(=N1)NC(=O)CCl)C(=O)O	581157	259.98912; 277.99968	30.61; 100.00	174.97274; 176.98839; 202.02809; 231.99420; 245.97347; 247.98912; 259.98912; 277.99968	28.80; 18.84; 14.51; 23.59; 73.82; 13.68; 84.76; 100.00	48.98395; 56.97935; 58.99500; 59.99025; 71.99025; 74.00590; 82.02874; 83.02399; 85.97920; 87.99485; 101.01680; 103.98977; 106.00542; 112.96918; 114.00081; 116.03422; 127.98008; 133.94619; 156.02261; 158.03826; 160.00629; 172.01752; 174.97274; 184.01752; 185.99679; 199.96799; 201.98364; 203.99929; 217.97855; 231.99420; 275.98403	10.15; 35.49; 7.39; 9.61; 13.48; 11.62; 10.18; 7.16; 18.41; 15.24; 35.71; 36.81; 6.98; 8.04; 45.78; 8.21; 10.93; 10.63; 100.00; 14.82; 9.50; 11.53; 11.09; 10.87; 9.30; 8.45; 58.01; 22.88; 8.16; 9.62; 8.62
62	82.06513	81.05784923	C5H7N	CCC=CC#N	25833	55.05423; 82.06513	30.46; 100.00	39.02293; 40.01818; 55.05423; 65.03858; 80.04948	47.81; 44.13; 100.00; 18.98; 16.43	39.02293; 40.01818; 52.01818; 55.05423; 65.03858; 66.03383; 80.04948	100.00; 56.34; 23.92; 54.77; 21.03; 43.94; 27.92
63	150.12773	149.1204495	C10H15N	CC(=CCCC(=CC#N)C)C	21768	55.05423; 65.03858; 66.03383; 67.05423; 69.06988; 79.05423; 81.06988; 83.08553; 93.06988; 94.06513; 107.08553; 109.10118; 123.11683; 133.10118; 150.12773	8.34; 10.12; 23.76; 29.64; 10.96; 23.17; 59.50; 27.42; 12.48; 100.00; 18.79; 25.73; 17.62; 9.21; 48.00	40.01818; 41.03858; 55.05423; 63.02293; 65.03858; 67.05423; 77.03858; 79.05423; 81.06988; 83.08553; 91.05423; 93.06988; 94.06513; 105.06988; 107.08553	29.32; 42.19; 37.35; 28.57; 41.64; 72.71; 64.51; 54.38; 100.00; 52.51; 80.82; 42.38; 40.48; 75.10; 26.29	39.02293; 40.01818; 41.03858; 55.05423; 64.01818; 65.03858; 66.03383; 67.05423; 75.02293; 77.03858; 79.05423; 80.04948; 81.06988; 89.03858; 91.05423; 92.04948; 93.06988; 105.06988	42.05; 37.65; 75.85; 53.30; 68.21; 57.73; 83.78; 86.09; 77.86; 44.36; 100.00; 34.78; 63.98; 39.95; 76.40; 56.43; 39.81; 45.47
64	127.08659	126.0793129	C6H10N2O	CC1=CC(=NN1CO)C	96393	80.04948; 97.07602; 109.07602; 127.08659	21.72; 100.00; 21.33; 39.09	67.05423; 69.06988; 80.04948; 81.04472; 95.06037; 97.07602; 109.07602	81.93; 39.20; 75.48; 19.90; 29.27; 100.00; 32.44	39.02293; 41.03858; 42.03383; 51.02293; 56.04948; 65.03858; 67.05423; 69.06988; 80.04948; 81.04472; 95.06037; 97.07602	20.30; 38.14; 16.75; 20.98; 20.28; 13.42; 100.00; 43.72; 14.93; 64.78; 19.36; 25.68
65	389.37779	388.3705162	C27H48O	CC(C)CCCC(C)C1CCC2C1(CCC3C2CCC4C3(CCC(C4)O)C)C	3240	43.05423; 57.06988; 85.10118; 285.25768; 287.27333; 303.26824; 315.30463; 371.36723; 389.37779	2.85; 4.20; 3.11; 3.05; 3.44; 5.83; 4.87; 22.74; 100.00	41.03858; 43.05423; 55.05423; 57.06988; 69.06988; 71.08553; 83.08553; 85.10118; 93.06988; 97.10118; 99.11683; 109.10118; 111.08044; 111.11683; 115.14813; 139.14813; 247.24203; 249.25768; 251.27333; 257.22638; 259.24203; 275.23694; 0.09721; 285.25768; 299.27333; 313.28898; 315.30463; 327.30463; 371.36723; 373.34649; 387.36214; 389.37779	55.26; 76.88; 20.08; 100.00; 39.00; 46.25; 18.45; 31.31; 14.60; 10.70; 30.21; 10.38; 10.96; 21.02; 10.77; 11.75; 22.14; 18.96; 10.13; 25.88; 16.76; 15.09; 0.033214; 15.15; 12.28; 9.79; 11.46; 10.45; 19.50; 15.52; 11.91; 59.13	41.03858; 43.05423; 55.05423; 57.06988; 69.06988; 71.08553; 81.06988; 83.08553; 93.06988; 95.08553; 97.10118; 107.08553; 109.10118; 111.11683; 113.09609; 123.11683; 147.11683; 149.13248; 151.14813; 161.13248; 163.14813; 181.15869; 223.24203; 235.20564; 263.23694; 263.27333; 265.28898; 277.25259; 277.28898; 303.26824; 387.36214	51.92; 56.17; 100.00; 48.77; 25.83; 18.07; 13.81; 28.72; 33.80; 73.32; 37.83; 29.25; 61.68; 71.59; 35.82; 32.25; 19.21; 31.10; 16.77; 21.53; 17.20; 17.14; 25.12; 21.61; 24.85; 50.12; 13.43; 17.48; 17.70; 14.50; 14.68
66	251.20056	250.1932801	C16H26O2	CC1(CCCC2(C1CCC3(C2CC(=O)O3)C)C)C	61129	191.17943; 205.19508; 233.18999; 235.16926; 251.20056	7.69; 4.39; 5.52; 2.45; 100.00	41.03858; 55.05423; 69.06988; 81.06988; 83.08553; 121.10118; 123.11683; 125.13248; 133.10118; 135.11683; 137.13248; 139.14813; 147.11683; 149.13248; 189.16378; 191.17943; 203.17943; 205.19508; 207.21073; 251.20056	8.98; 11.76; 9.77; 13.17; 20.30; 18.97; 32.74; 7.22; 6.50; 26.05; 18.40; 16.95; 7.10; 9.75; 23.46; 62.34; 62.27; 100.00; 43.37; 25.03	39.02293; 41.03858; 43.05423; 53.03858; 55.05423; 57.06988; 67.05423; 69.06988; 79.05423; 81.06988; 83.08553; 93.06988; 95.08553; 97.06479; 99.04406; 105.06988; 107.08553; 119.08553; 121.10118; 123.11683; 133.10118; 149.13248; 167.10666; 173.13248; 189.16378; 235.16926	29.98; 29.04; 62.08; 28.97; 89.61; 12.92; 49.60; 53.95; 100.00; 59.03; 27.24; 12.50; 21.71; 15.63; 30.83; 14.87; 31.60; 31.65; 34.28; 31.43; 13.40; 37.58; 17.57; 20.85; 17.62; 43.30
67	241.10212	240.0948488	C9H21ClO3Si	CCO[Si](CCCCl)(OCC)OCC	78771	151.03405; 195.06026; 241.10213	60.63; 84.99; 100.00	62.99960; 65.01525; 77.01525; 79.03090; 135.04720; 149.06285; 151.07850; 183.02387; 213.07083; 241.10213	40.05; 35.70; 48.85; 34.44; 16.09; 14.32; 14.44; 87.69; 100.00; 56.09	41.03858; 43.05423; 77.01525	52.71; 20.17; 100.00
68	199.05517	198.0478986	C6H15ClO3Si	CO[Si](CCCCl)(OC)OC	62449	135.00275; 167.02896; 199.05518	40.59; 100.00; 23.03	62.99960; 65.01525; 77.01525; 91.02098; 105.03663; 123.04720; 133.06793; 167.02896; 169.04461; 199.05518	100.00; 42.78; 31.01; 17.53; 15.51; 17.28; 21.41; 36.41; 17.57; 28.42	41.03858; 62.99960; 77.01525	100.00; 41.80; 68.72
69	248.13126	247.1239847	C10H21NO4Si	CCO[Si](CCCN=C=O)(OCC)OCC	90613	41.03858; 70.02874; 84.04439; 147.08358; 157.06793; 159.08358; 202.08940; 204.10505; 206.12070; 248.13126	9.51; 10.32; 31.53; 5.91; 7.76; 10.74; 27.09; 43.75; 15.29; 100.00	29.03858; 44.01309; 44.04948; 45.03349; 54.03383; 56.01309; 58.02874; 58.06513; 68.04948; 70.02874; 72.04439; 84.04439; 86.06004; 131.05228; 145.03155; 147.04720; 149.06285; 151.07850; 159.04720; 161.06285; 189.09415; 190.05301; 192.06866; 202.08940; 204.10505; 220.09996; 248.13126	13.95; 28.68; 11.80; 6.73; 39.65; 18.61; 12.07; 11.22; 9.45; 19.15; 40.91; 58.07; 31.70; 6.50; 19.91; 21.63; 47.59; 24.29; 13.81; 10.10; 6.44; 7.99; 9.79; 8.39; 9.95; 100.00; 34.61	41.03858; 44.01309; 45.03349; 56.01309; 58.02874; 58.06513; 66.03383; 68.04948; 70.02874; 84.04439	25.66; 92.41; 32.40; 17.03; 12.95; 27.43; 21.57; 100.00; 18.90; 30.51
70	143.10666	142.0993797	C8H14O2	CCC=CCCOC(=O)C	15574	41.03858; 43.01784; 53.03858; 55.05423; 81.06988; 83.08553	13.83; 30.20; 20.63; 100.00; 51.25; 90.07	41.03858; 43.01784; 53.03858; 55.05423; 81.06988; 83.08553	12.88; 30.28; 15.13; 100.00; 16.56; 10.40	41.03858; 43.01784; 53.03858; 55.05423; 79.05423; 81.06988	11.56; 37.06; 18.02; 100.00; 24.37; 22.18
71	183.13796	182.1306798	C11H18O2	CCC=CCCOC(=O)C(=CC)C	49993	55.05423; 79.05423; 81.06988; 83.04914; 83.08553; 101.05971	30.71; 20.14; 87.87; 100.00; 89.06; 70.59	41.03858; 55.05423; 67.05423; 79.05423; 81.03349; 81.06988; 83.04914; 83.08553; 101.05971	12.42; 100.00; 12.88; 6.28; 7.60; 28.25; 32.56; 41.54; 14.20	39.02293; 41.03858; 43.05423; 53.03858; 55.05423; 67.05423; 81.06988; 83.08553	19.64; 11.05; 14.80; 9.57; 100.00; 25.35; 24.84; 25.57
72	171.13796	170.1306798	C10H18O2	CCC=CCCOC(=O)C(C)C	93832	43.05423; 55.05423; 71.04914; 83.08553; 89.05971	92.44; 82.72; 100.00; 81.16; 47.74	41.03858; 43.05423; 55.05423; 71.04914; 73.06479; 81.06988; 85.06479; 101.05971	12.41; 46.30; 71.93; 100.00; 10.18; 10.37; 11.50; 20.28	39.02293; 41.03858; 43.05423; 53.03858; 55.05423; 57.06988; 71.04914; 79.05423; 81.06988	8.17; 18.55; 26.99; 11.26; 100.00; 9.08; 24.49; 19.53; 26.87
73	205.12231	204.1150297	C13H16O2	CCC=CCCOC(=O)C1=CC=CC=C1	32809	55.05423; 79.05423; 105.03349; 123.04406; 205.12231	49.94; 42.88; 100.00; 89.37; 71.52	55.05423; 79.05423; 105.03349; 123.04406	63.74; 31.90; 100.00; 11.40	51.02293; 55.05423; 67.05423; 77.03858; 79.05423; 91.05423; 105.03349; 135.04406	6.77; 38.09; 4.64; 17.34; 41.89; 11.24; 100.00; 5.17
74	199.16926	198.1619799	C12H22O2	CCCCCC(=O)OCCC=CCC	61895	55.05423; 57.06988; 67.05423; 81.06988; 83.08553; 99.08044; 199.16926	61.83; 15.76; 13.68; 24.98; 100.00; 35.01; 12.03	41.03858; 53.03858; 55.05423; 57.06988; 67.05423; 69.06988; 71.08553; 79.05423; 81.06988; 83.08553; 85.10118; 99.08044; 117.09101	15.63; 7.39; 100.00; 23.79; 6.87; 10.52; 54.18; 21.18; 44.30; 27.99; 14.58; 85.53; 12.60	39.02293; 41.03858; 43.05423; 45.03349; 55.05423; 57.06988; 67.05423; 69.06988; 71.08553; 79.05423; 81.06988; 83.08553; 85.10118; 99.08044; 101.09609	12.85; 15.53; 21.77; 9.92; 91.17; 56.78; 26.22; 15.93; 15.84; 34.66; 100.00; 26.52; 8.56; 39.97; 8.19
75	157.12231	156.1150297	C9H16O2	CCC=CCCOC(=O)CC	36503	41.03858; 53.03858; 55.05423; 57.03349; 69.06988; 81.06988; 83.08553	10.31; 17.53; 100.00; 79.62; 12.75; 47.75; 94.55	39.02293; 41.03858; 53.03858; 55.05423; 57.03349; 81.06988; 83.08553	12.11; 16.39; 11.65; 100.00; 41.87; 15.06; 16.00	39.02293; 41.03858; 43.05423; 53.03858; 55.05423; 57.03349; 67.05423; 79.05423; 81.06988	9.41; 21.55; 12.81; 11.86; 100.00; 45.72; 13.39; 29.33; 28.07
76	221.11722	220.1099444	C13H16O3	CCC=CCCOC(=O)C1=CC=CC=C1O	103379	121.02841; 127.07536; 139.03897; 221.11722	100.00; 8.39; 12.31; 44.70	55.05423; 77.03858; 93.03349; 95.04914; 121.02841; 139.03897	14.30; 5.36; 8.58; 12.70; 100.00; 9.89	39.02293; 41.03858; 51.02293; 53.03858; 55.05423; 65.03858; 67.05423; 77.03858; 79.05423; 91.01784; 93.03349; 95.04914; 107.04914; 121.02841	9.08; 9.70; 13.60; 16.58; 100.00; 6.88; 10.09; 51.43; 12.35; 9.70; 17.23; 41.74; 10.83; 92.37
77	139.07536	138.0680796	C8H10O2	COC1=CC=C(C=C1)CO	7738	121.06479; 139.07536	100.00; 84.25	65.03858; 77.03858; 91.05423; 93.06988; 95.04914; 107.04914; 109.06479; 111.08044; 121.06479; 139.07536	18.43; 15.04; 10.38; 34.24; 18.47; 13.84; 10.22; 14.17; 100.00; 30.86	39.02293; 51.02293; 53.03858; 63.02293; 65.03858; 75.02293; 77.03858; 79.05423; 91.05423; 93.06988; 107.04914; 119.04914; 121.06479	9.57; 37.43; 13.69; 8.07; 45.26; 6.79; 100.00; 7.82; 27.52; 8.64; 29.78; 9.32; 6.76
78	195.10157	194.0942943	C11H14O3	CCOC(=O)COC1=CC=C(C=C1)C	4047281	43.01784; 45.03349; 71.04914; 81.06988; 89.05971; 91.05423; 107.04914; 109.06479; 149.05971; 167.07027; 195.10157	56.85; 21.28; 14.95; 15.27; 18.65; 17.53; 13.84; 56.60; 38.37; 14.26; 100.00	41.00219; 43.01784; 59.01276; 79.05423; 81.06988; 87.04406; 91.05423; 93.06988; 95.08553; 107.04914; 109.06479; 121.06479; 149.05971; 167.07027; 195.10157	15.50; 100.00; 25.16; 15.98; 35.56; 18.77; 92.36; 57.71; 21.21; 26.64; 40.44; 92.42; 46.88; 22.39; 45.21	43.01784; 44.99711; 45.03349; 55.05423; 65.03858; 77.03858; 79.05423; 81.06988; 91.05423; 93.06988; 107.04914; 121.06479	8.79; 12.99; 8.73; 13.32; 8.14; 12.85; 15.75; 8.73; 100.00; 19.15; 8.50; 13.79
79	191.11789	190.1106131	C11H14N2O	CC1C(NC(=O)N1C)C2=CC=CC=C2	230547	163.12297; 191.11789	6.28; 100.00	91.05423; 106.06513; 117.06988; 132.08078; 134.09643; 136.11208; 146.09643; 163.12297; 173.10732; 174.09134; 191.11789	42.41; 20.93; 69.59; 29.79; 42.78; 12.99; 44.30; 19.82; 13.93; 58.18; 100.00	42.03383; 56.04948; 58.06513; 70.06513; 79.05423; 89.03858; 91.05423; 93.06988; 104.04948; 106.06513; 115.05423; 117.06988; 119.08553; 130.06513; 132.08078; 133.03964; 161.07094; 163.08659; 191.11789	3.22; 8.42; 6.81; 6.20; 26.09; 6.27; 100.00; 4.25; 7.95; 13.22; 12.38; 12.37; 3.25; 12.80; 7.66; 4.41; 4.69; 3.03; 4.74
80	177.10224	176.094963	C10H12N2O	CC1C(OC(=N1)N)C2=CC=CC=C2	92196	132.08078; 177.10224	30.63; 100.00	91.05423; 115.05423; 117.06988; 132.08078; 134.09643; 177.10224	100.00; 22.35; 31.03; 65.02; 20.75; 42.33	65.03858; 67.05423; 77.03858; 89.03858; 91.05423; 115.05423; 117.06988; 125.07094; 131.04914; 132.08078	15.17; 11.99; 15.24; 13.19; 100.00; 35.80; 36.69; 11.58; 10.49; 9.23
81	234.11361	233.1063362	C10H16FNO4	CC(C)(C)OC(=O)N1CC(CC1C(=O)O)F	4712523	134.06118; 178.05101; 216.10305; 234.11361	97.96; 22.62; 20.51; 100.00	57.06988; 114.05495; 116.05062; 132.04553; 134.06118; 158.04478; 160.04045; 178.05101; 234.11361	61.62; 25.84; 33.18; 100.00; 77.35; 55.69; 41.65; 89.77; 25.15	41.03858; 45.01350; 47.02915; 55.05423; 57.06988; 59.02915; 73.04480; 74.02365; 75.08044; 86.04005; 88.05570; 106.02988; 114.05495; 116.05062; 117.03463; 130.02988; 132.04553; 134.06118; 176.03536	36.65; 21.03; 36.57; 46.14; 100.00; 11.62; 8.60; 8.18; 9.82; 69.89; 70.30; 6.30; 10.20; 9.40; 7.80; 8.65; 50.55; 16.74; 8.08
82	219.01441	218.0071365	C8H10O3S2	CC1CC(C2=C(S1(=O)=O)SC=C2)O	68606740	201.00385; 219.01441	6.42; 100.00	55.05423; 71.04914; 85.01065; 110.98991; 113.00556; 135.02630; 137.04195; 155.05251; 201.00385; 219.01441	3.85; 4.73; 7.37; 4.48; 23.69; 4.24; 9.21; 5.16; 10.50; 100.00	41.03858; 44.97935; 55.05423; 56.97935; 58.99500; 61.01065; 64.96918; 69.03349; 70.99500; 85.01065; 101.00556; 109.01065; 109.06479; 113.00556; 133.01065; 134.99328; 135.02630; 137.04195; 141.00048; 143.01613; 150.98820; 153.03686; 157.03178; 167.01613; 171.01104; 175.04234; 198.98820; 201.00385; 202.98311; 219.01441; 0.0018764	29.79; 13.69; 30.43; 28.11; 47.67; 18.45; 34.73; 16.75; 63.15; 14.64; 27.99; 14.26; 14.16; 19.98; 42.43; 13.44; 74.62; 26.10; 41.22; 34.68; 16.36; 9.88; 100.00; 20.74; 10.67; 17.49; 15.47; 20.44; 10.81; 22.34; 0.00070597
83	155.14304	154.1357652	C10H18O	CCCCCC=CCCC=O	61875	39.02293; 41.03858; 43.05423; 55.05423; 57.06988; 59.04914; 67.05423; 69.06988; 79.05423; 81.06988; 83.08553; 93.06988; 95.08553; 109.10118	13.40; 39.55; 17.50; 45.50; 16.16; 20.60; 56.30; 53.66; 52.11; 100.00; 40.69; 35.96; 44.45; 16.84	41.03858; 43.01784; 43.05423; 55.05423; 57.06988; 67.05423; 69.06988; 71.08553; 79.05423; 81.06988; 83.08553; 95.08553	67.58; 17.55; 31.65; 100.00; 22.60; 99.63; 93.19; 24.69; 30.11; 50.68; 35.64; 24.43	41.03858; 43.01784; 43.05423; 53.03858; 55.05423; 65.03858; 67.05423; 69.06988; 79.05423; 81.06988	67.64; 24.00; 49.27; 19.95; 100.00; 30.95; 47.52; 32.59; 40.65; 52.20
84	162.07608	161.0688078	C6H11NO4	COC(=O)CCC(C(=O)O)N	73913	56.04948; 84.04439; 86.06004; 88.07569; 116.07060; 130.04987; 144.06552; 162.07608	19.19; 57.88; 31.93; 35.72; 100.00; 26.25; 19.31; 71.35	42.03383; 44.04948; 56.04948; 57.03349; 84.04439; 86.06004; 88.07569; 98.06004; 99.04406; 114.05495; 116.07060	14.26; 13.26; 31.84; 12.49; 86.23; 100.00; 17.48; 16.96; 94.17; 10.86; 69.92	30.03383; 42.03383; 44.04948; 55.01784; 56.04948; 58.06513; 84.04439; 86.06004; 98.06004; 99.04406; 116.07060	4.27; 4.92; 4.10; 7.55; 100.00; 3.91; 16.15; 6.56; 5.09; 3.77; 5.29
85	233.03638	232.0291072	C13H9ClO2	C1=CC=C(C=C1)C(=O)C2=C(C=CC(=C2)Cl)O	6799	105.03349; 233.03638	6.80; 100.00	105.03349; 154.98943	38.22; 100.00	51.02293; 72.98395; 77.03858; 96.98395; 98.99960; 105.03349; 107.04914; 122.96322; 124.97887; 126.99452; 131.04914; 154.98943; 183.02073; 215.02582	9.68; 9.78; 100.00; 4.40; 4.46; 24.72; 8.42; 9.71; 8.84; 54.79; 5.98; 17.36; 4.28; 12.67
86	147.10157	146.0942943	C7H14O3	CCC1(COCOC1)CO	78860	69.06988; 83.08553; 99.08044; 101.05971; 101.09609; 103.07536; 129.09101; 147.10157	6.97; 11.51; 10.73; 17.09; 9.40; 8.27; 100.00; 49.14	45.03349; 55.05423; 61.02841; 67.05423; 69.06988; 71.04914; 71.08553; 83.04914; 85.06479; 87.08044; 99.08044; 101.09609; 113.05971; 115.07536; 117.09101; 129.09101; 147.10157	25.69; 29.58; 38.79; 24.83; 100.00; 12.33; 57.64; 19.77; 25.84; 33.64; 44.18; 13.97; 19.26; 17.15; 22.00; 36.36; 24.95	45.03349; 55.05423; 67.05423; 69.06988; 71.04914; 85.06479; 87.04406; 87.08044; 99.04406; 99.08044; 101.05971; 115.07536; 117.09101	100.00; 17.54; 8.87; 32.09; 11.78; 65.45; 21.72; 51.17; 7.82; 26.41; 18.26; 12.20; 9.24
87	303.23186	302.2245802	C20H30O2	CCC=CCC=CCC=CCC=CCC=CCCCC(=O)O	3209	67.05423; 79.05423; 81.06988; 85.06479; 89.05971; 93.06988; 95.08553; 99.04406; 103.07536; 117.06988; 121.10118; 131.08553; 133.10118; 135.11683; 145.10118; 149.13248; 161.13248; 171.11683; 173.13248; 175.14813; 185.13248; 187.14813; 189.16378; 199.14813; 207.13796; 211.14813; 213.16378; 243.21073; 267.21073; 285.22129; 303.23186	5.64; 11.37; 7.90; 4.86; 4.58; 7.81; 4.52; 6.91; 6.57; 7.93; 5.02; 32.69; 11.88; 4.45; 14.34; 4.14; 4.87; 14.55; 6.40; 6.67; 18.58; 4.18; 6.20; 6.51; 3.89; 7.55; 4.17; 4.27; 18.17; 53.64; 100.00	55.05423; 67.05423; 79.05423; 81.06988; 85.06479; 89.03858; 91.05423; 93.06988; 95.08553; 103.05423; 105.06988; 107.08553; 117.06988; 119.08553; 121.10118; 129.06988; 131.08553; 133.10118; 143.08553; 145.10118; 147.11683; 161.13248; 171.11683; 173.13248; 185.13248; 187.14813; 199.14813; 213.16378; 267.21073; 285.22129; 303.23186	20.77; 27.87; 25.46; 47.15; 9.09; 24.98; 46.29; 45.08; 26.59; 17.04; 27.92; 31.15; 29.79; 51.17; 23.85; 15.09; 100.00; 31.27; 9.00; 40.88; 9.15; 10.15; 52.40; 12.50; 22.52; 11.22; 16.04; 14.98; 12.71; 23.61; 21.88	41.03858; 55.05423; 65.03858; 67.05423; 77.03858; 79.05423; 81.06988; 89.03858; 91.05423; 93.06988; 95.08553; 101.03858; 103.05423; 105.06988; 107.08553; 117.06988; 119.08553; 121.10118; 129.06988; 131.08553; 133.10118; 143.08553; 145.10118; 171.11683; 233.15361; 249.18491; 259.16926; 273.18491	10.62; 13.96; 5.81; 45.58; 16.18; 36.47; 48.69; 13.93; 100.00; 29.66; 12.19; 4.85; 22.72; 35.00; 9.09; 19.26; 22.86; 5.15; 16.06; 37.02; 12.83; 5.43; 10.63; 11.37; 4.93; 5.57; 5.85; 5.78
88	143.14304	142.1357652	C9H18O	CCC=CCCCCCO	61950	41.03858; 43.05423; 55.05423; 57.06988; 59.04914; 69.06988; 71.08553; 73.06479; 81.06988; 83.08553; 95.08553; 97.10118; 143.14304	32.56; 20.28; 100.00; 25.97; 13.03; 64.61; 24.05; 21.37; 21.07; 23.08; 13.32; 14.99; 11.94	41.03858; 55.05423; 57.06988; 69.06988; 71.08553	28.81; 67.83; 17.91; 100.00; 13.11	39.02293; 41.03858; 43.05423; 45.03349; 53.03858; 55.05423; 69.06988; 81.06988	46.92; 78.21; 36.68; 41.64; 25.37; 100.00; 32.69; 29.15
89	267.23186	266.2245802	C17H30O2	CCOC(=O)C=C(C)C=CCC(C)CCCC(C)C	38759	71.08553; 81.03349; 83.04914; 95.08553; 99.04406; 107.08553; 109.10118; 111.11683; 121.10118; 123.11683; 127.07536; 129.09101; 135.08044; 137.09609; 137.13248; 139.11174; 151.14813; 165.12739; 177.16378; 179.17943; 181.12231; 181.19508; 193.19508; 195.21073; 203.17943; 205.19508; 209.15361; 221.18999; 239.20056; 249.22129; 267.23186	7.50; 11.45; 5.58; 5.08; 6.32; 10.11; 18.35; 8.79; 8.21; 6.52; 14.43; 19.14; 6.76; 6.59; 7.37; 5.48; 5.53; 11.07; 5.99; 9.45; 14.63; 12.91; 22.05; 5.14; 5.93; 5.72; 8.26; 67.19; 22.16; 15.54; 100.00	55.05423; 57.06988; 69.06988; 71.08553; 79.05423; 81.03349; 81.06988; 83.08553; 85.06479; 85.10118; 93.06988; 95.04914; 95.08553; 97.10118; 99.04406; 107.08553; 109.06479; 109.10118; 111.11683; 113.05971; 113.13248; 121.10118; 123.11683; 137.09609; 137.13248; 151.11174; 151.14813; 165.12739; 193.19508; 203.17943; 221.18999	28.90; 57.46; 52.26; 66.27; 34.66; 28.12; 55.41; 47.69; 27.70; 84.97; 55.14; 73.54; 34.79; 58.11; 43.95; 52.67; 54.97; 100.00; 84.28; 30.02; 33.90; 51.70; 33.78; 84.65; 31.70; 37.21; 33.16; 51.78; 59.96; 56.27; 98.51	39.02293; 41.03858; 43.01784; 43.05423; 55.05423; 57.06988; 67.05423; 69.03349; 69.06988; 71.08553; 79.05423; 81.03349; 81.06988; 83.04914; 83.08553; 85.02841; 85.10118; 91.05423; 93.06988; 95.04914; 95.08553; 99.04406; 107.04914; 107.08553; 109.06479; 109.10118; 111.11683; 119.08553; 121.10118; 123.11683; 193.19508	12.68; 87.89; 11.66; 79.73; 100.00; 62.74; 50.95; 20.97; 59.30; 71.84; 32.33; 24.92; 82.41; 11.09; 42.11; 10.40; 49.73; 10.70; 54.71; 9.78; 31.88; 24.73; 10.34; 31.70; 14.23; 48.21; 15.58; 10.47; 25.29; 18.76; 11.48
90	370.33157	369.3242942	C22H43NO3	CCCCCCCCC=CCCCCCCCC(=O)N(CCO)CCO	7164	43.05423; 45.03349; 57.06988; 71.08553; 88.07569; 97.10118; 104.07060; 106.08626; 223.24203; 237.25768; 247.24203; 265.25259; 326.30536; 338.30536; 352.32101; 370.33157	1.79; 3.22; 4.18; 1.96; 8.93; 1.73; 2.06; 22.30; 1.86; 2.98; 1.99; 7.81; 4.18; 1.82; 16.78; 100.00	45.03349; 55.05423; 57.06988; 60.04439; 62.06004; 69.06988; 74.06004; 83.08553; 88.03930; 88.07569; 95.08553; 97.10118; 102.05495; 106.08626; 109.10118; 123.11683; 132.06552; 137.13248; 139.14813; 146.08117; 207.21073; 209.22638; 223.24203; 235.24203; 237.25768; 247.24203; 265.25259; 326.30536; 338.30536; 352.32101; 370.33157	16.12; 7.18; 12.73; 89.64; 20.41; 11.53; 38.70; 5.42; 5.01; 84.72; 5.03; 7.54; 7.46; 100.00; 6.11; 14.98; 7.35; 5.61; 6.84; 5.13; 5.03; 12.41; 10.57; 8.94; 11.53; 7.03; 18.22; 10.82; 6.27; 22.56; 50.24	41.03858; 43.05423; 45.03349; 55.05423; 57.06988; 60.04439; 62.06004; 67.05423; 69.06988; 71.08553; 74.06004; 81.06988; 83.08553; 88.03930; 88.07569; 90.05495; 93.06988; 95.08553; 102.05495; 106.08626; 109.10118; 116.07060; 123.11683; 127.14813; 130.08626; 132.06552; 223.24203; 326.30536	11.77; 26.12; 100.00; 26.80; 35.68; 50.82; 7.21; 6.69; 20.51; 9.65; 9.10; 16.40; 10.57; 12.79; 53.13; 10.89; 15.32; 13.79; 21.70; 48.00; 10.29; 25.26; 10.56; 6.73; 9.50; 7.91; 8.18; 11.10
91	282.27914	281.2718647	C18H35NO	CCCCCCCCC=CCCCCCCCC(=O)N	1930	43.05423; 55.05423; 57.06988; 69.06988; 71.08553; 81.06988; 83.08553; 85.10118; 88.07569; 95.08553; 97.10118; 100.07569; 109.10118; 114.09134; 123.11683; 125.13248; 137.13248; 139.14813; 154.12264; 156.13829; 167.17943; 223.24203; 237.25768; 247.24203; 264.26858; 265.25259; 282.27914	1.97; 2.87; 4.70; 3.81; 2.32; 2.98; 2.73; 1.38; 2.17; 2.15; 3.10; 1.66; 4.36; 1.98; 1.69; 4.54; 1.65; 2.20; 2.40; 1.61; 1.61; 1.73; 1.57; 4.91; 5.12; 20.07; 100.00	41.03858; 43.05423; 55.05423; 57.06988; 67.05423; 69.06988; 70.06513; 71.08553; 81.06988; 83.08553; 88.07569; 93.06988; 95.08553; 97.10118; 107.08553; 109.10118; 123.11683; 125.13248; 135.11683; 137.13248; 139.14813; 151.14813; 154.12264; 165.16378; 167.17943; 209.22638; 223.24203; 247.24203; 264.26858; 265.25259; 282.27914	7.86; 10.31; 25.61; 32.94; 8.11; 43.88; 9.20; 18.90; 24.06; 28.65; 12.37; 20.25; 19.70; 32.41; 14.49; 35.80; 21.37; 10.16; 9.08; 16.56; 23.08; 8.22; 10.74; 10.44; 9.55; 9.79; 13.36; 12.48; 28.49; 34.82; 100.00	41.03858; 43.01784; 43.05423; 55.05423; 57.06988; 67.05423; 69.06988; 71.08553; 79.05423; 81.06988; 83.08553; 93.06988; 95.08553; 97.10118; 107.08553; 109.10118; 123.11683; 210.18524	44.98; 8.80; 74.53; 100.00; 88.11; 31.21; 68.44; 24.76; 27.50; 68.42; 31.49; 42.44; 39.58; 14.09; 17.58; 28.36; 9.00; 8.70
92	299.25807	298.2507949	C18H34O3	CCCCCCC(CC=CCCCCCCCC(=O)O)O	8839	55.05423; 69.06988; 71.04914; 87.04406; 89.05971; 95.08553; 97.10118; 109.10118; 111.11683; 121.10118; 123.11683; 135.11683; 137.13248; 141.12739; 149.13248; 151.14813; 155.10666; 163.14813; 165.16378; 183.13796; 197.15361; 199.16926; 209.18999; 211.16926; 219.21073; 221.22638; 233.22638; 235.24203; 263.23694; 281.24751; 299.25807	2.23; 1.52; 2.85; 1.79; 4.34; 3.94; 5.48; 3.00; 1.69; 1.59; 2.26; 4.03; 7.51; 2.18; 3.43; 3.70; 1.49; 2.71; 2.34; 5.08; 2.27; 1.55; 1.74; 1.51; 1.81; 3.14; 2.28; 5.51; 51.75; 100.00; 40.98	55.05423; 57.06988; 69.06988; 71.04914; 71.08553; 79.05423; 81.06988; 83.08553; 85.06479; 85.10118; 93.06988; 95.08553; 97.10118; 99.08044; 111.08044; 113.09609; 121.10118; 123.08044; 123.11683; 135.11683; 137.13248; 139.11174; 139.14813; 141.12739; 149.13248; 151.14813; 163.14813; 165.16378; 263.23694; 281.24751; 299.25807	42.98; 15.30; 30.02; 21.96; 24.78; 13.98; 30.96; 42.80; 24.98; 30.69; 13.68; 25.21; 16.12; 22.71; 25.58; 20.15; 30.82; 14.97; 41.08; 32.19; 33.83; 17.90; 22.14; 21.51; 25.21; 21.61; 21.25; 21.41; 100.00; 83.77; 25.31	41.03858; 43.05423; 55.05423; 57.03349; 57.06988; 59.04914; 67.05423; 69.06988; 71.04914; 71.08553; 73.02841; 73.06479; 75.04406; 79.05423; 81.06988; 83.08553; 85.06479; 93.06988; 95.08553; 97.10118; 107.08553; 109.10118; 121.10118; 123.08044; 123.11683; 125.09609; 125.13248; 135.11683; 137.13248; 139.14813; 153.16378	51.14; 52.63; 100.00; 14.15; 43.02; 6.84; 17.25; 24.14; 9.07; 17.62; 6.00; 7.07; 5.58; 17.02; 64.89; 17.79; 9.54; 13.46; 36.92; 9.18; 16.55; 13.40; 43.27; 14.11; 27.98; 7.13; 14.98; 14.82; 14.44; 11.95; 6.24
93	327.19884	326.191566	C18H30O3S	CCCCCCCCCCCCC1=CC=C(C=C1)S(=O)(=O)O	8485	245.22638; 327.19884	3.51; 100.00	57.06988; 71.08553; 81.06988; 91.05423; 93.06988; 95.08553; 103.05423; 105.06988; 107.08553; 109.10118; 117.06988; 119.08553; 123.11683; 131.08553; 133.10118; 145.10118; 159.11683; 161.13248; 165.16378; 199.04234; 201.05799; 213.05799; 215.07364; 227.07364; 229.08929; 241.08929; 243.10494; 245.22638; 297.15189; 325.18319; 327.19884	6.26; 5.72; 17.93; 7.58; 6.87; 16.31; 5.63; 8.70; 4.83; 5.60; 13.84; 11.73; 6.57; 9.76; 8.32; 4.51; 6.73; 5.54; 8.42; 4.98; 8.03; 8.75; 4.91; 4.69; 5.12; 7.41; 5.03; 17.35; 4.46; 12.89; 100.00	43.05423; 55.05423; 57.06988; 79.05423; 81.06988; 91.05423; 93.06988; 95.08553; 101.03858; 103.05423; 105.06988; 109.10118; 125.13248; 127.05423; 129.06988; 131.08553; 133.10118; 143.08553; 145.10118; 147.11683; 149.13248; 159.11683; 213.05799; 215.07364; 229.08929; 233.22638; 255.10494; 257.12059; 297.15189; 301.18319; 327.19884	51.67; 23.30; 49.35; 59.08; 100.00; 54.93; 22.82; 86.72; 47.71; 79.70; 21.17; 52.22; 13.44; 30.65; 92.63; 99.59; 14.96; 39.21; 26.57; 13.43; 19.13; 13.14; 13.69; 20.17; 14.51; 24.85; 16.02; 15.04; 34.63; 29.76; 14.88
94	96.96063	95.9533555	C2H2Cl2	C(=CCl)Cl	10900	60.98395; 96.96063	4.67; 100.00	60.98395; 96.96063	87.79; 100.00	60.98395; 96.96063	100.00; 6.74
95	212.8909	211.88363	C4H6Br2	C(C=CCBr)Br	13180	132.96474; 212.89090	8.96; 100.00	53.03858; 106.94909; 132.96474; 212.89090	18.95; 23.96; 100.00; 10.42	39.02293; 53.03858	100.00; 53.08
96	255.23186	254.2245802	C16H30O2	CCC=CCCCCCCCCCCOC(=O)C	88663	41.03858; 43.01784; 55.05423; 61.02841; 67.05423; 69.06988; 81.06988; 83.08553; 93.06988; 95.08553; 97.10118; 107.08553; 109.10118; 111.11683; 115.07536; 121.10118; 123.11683; 125.13248; 137.13248; 165.16378; 193.19508; 195.21073; 237.22129; 255.23186	7.24; 11.38; 17.82; 8.21; 7.77; 19.78; 12.23; 11.49; 7.93; 22.46; 29.48; 8.56; 12.42; 9.90; 5.65; 5.84; 24.67; 11.54; 11.46; 6.13; 6.43; 22.34; 11.70; 100.00	41.03858; 43.01784; 43.05423; 55.05423; 57.06988; 61.02841; 67.05423; 69.06988; 71.08553; 79.05423; 81.06988; 83.08553; 93.06988; 95.08553; 97.10118; 107.08553; 109.10118; 111.11683; 121.10118; 123.11683; 125.13248; 137.13248; 139.14813; 255.23186	16.33; 54.49; 16.67; 99.72; 62.87; 23.07; 27.97; 100.00; 54.87; 21.44; 46.21; 68.74; 37.76; 64.75; 50.27; 30.56; 46.23; 30.00; 23.74; 39.01; 15.14; 15.10; 16.90; 29.89	41.03858; 43.01784; 43.05423; 45.03349; 55.05423; 57.06988; 67.05423; 69.06988; 79.05423; 81.06988; 83.08553; 93.06988; 95.08553	38.18; 30.71; 13.93; 20.61; 100.00; 14.77; 31.46; 75.80; 20.57; 43.61; 24.82; 22.98; 29.44
97	101.09609	100.088815	C6H12O	CCCC=CCO	13577	41.03858; 43.05423; 55.05423; 69.06988; 83.08553	100.00; 44.88; 46.35; 67.48; 42.66	41.03858; 43.05423; 55.05423	45.50; 17.01; 100.00	39.02293; 41.03858; 53.03858; 55.05423	47.73; 64.07; 16.20; 100.00
98	141.12739	140.1201151	C9H16O	CCCCCCC=CC=O	17166	41.03858; 43.05423; 53.03858; 55.05423; 57.03349; 57.06988; 67.05423; 69.06988; 71.08553; 79.05423; 81.06988; 93.06988; 95.08553	45.97; 23.85; 25.89; 100.00; 19.05; 30.13; 38.56; 51.80; 18.74; 37.29; 60.12; 19.21; 37.87	39.02293; 41.03858; 53.03858; 55.05423; 57.03349; 57.06988; 67.05423; 69.03349; 69.06988; 71.04914; 79.05423; 81.06988	30.37; 53.08; 100.00; 71.54; 40.62; 42.36; 29.49; 46.71; 43.39; 36.63; 26.30; 28.32	41.03858; 43.01784; 43.05423; 53.03858; 55.05423; 57.06988; 67.05423; 69.06988; 79.05423; 81.06988; 93.06988	95.14; 65.76; 42.55; 40.47; 100.00; 33.54; 78.56; 62.20; 97.45; 38.63; 40.95
99	139.0502	138.0429274	C6H6N2O2	C1=C(NC=N1)C=CC(=O)O	1178	121.03964; 139.05020	100.00; 96.07	66.03383; 67.01784; 79.01784; 79.02907; 80.01309; 93.04472; 94.02874; 121.03964; 139.05020	12.07; 6.31; 7.52; 5.33; 6.04; 95.54; 10.32; 100.00; 7.86	39.02293; 41.03858; 42.03383; 43.02907; 51.02293; 65.00219; 66.03383; 68.04948; 78.03383; 93.04472; 94.02874	93.77; 31.65; 39.49; 10.56; 22.76; 9.91; 100.00; 26.95; 21.27; 76.41; 10.02
101	123.04406	122.0367794	C7H6O2	C1=COC(=C1)C=CC=O	12174	41.00219; 77.03858; 81.03349; 93.03349; 95.04914; 105.03349; 121.02841; 123.04406	13.35; 24.27; 12.14; 17.10; 47.18; 25.60; 22.04; 100.00	39.02293; 51.02293; 53.03858; 65.03858; 77.03858; 81.03349; 93.03349; 95.04914; 105.03349; 121.02841	15.60; 15.93; 40.98; 23.43; 41.21; 21.08; 100.00; 71.37; 72.43; 63.07	39.02293; 43.01784; 51.02293; 53.03858; 63.02293; 65.03858; 75.02293; 77.03858; 87.02293; 105.03349; 121.02841	91.09; 30.63; 43.70; 71.58; 28.15; 86.31; 29.35; 89.05; 82.95; 78.41; 100.00
102	102.05495	101.0476785	C4H7NO2	C(C=CC(=O)O)N	2766	67.01784; 84.04439; 85.02841; 102.05495	35.03; 100.00; 77.42; 36.43	39.02293; 43.01784; 55.01784; 56.04948; 57.03349; 66.03383; 67.01784; 84.04439; 85.02841	57.78; 54.54; 76.57; 71.24; 91.09; 51.69; 83.09; 100.00; 56.59	39.02293; 41.03858; 56.04948; 67.01784	100.00; 31.89; 16.18; 9.58
103	241.21621	240.2089301	C15H28O2	CCCCCCCCC=CCCCOC(=O)C	62236	43.01784; 55.05423; 57.06988; 61.02841; 67.05423; 69.06988; 71.08553; 79.05423; 81.06988; 83.08553; 93.06988; 95.08553; 97.10118; 109.10118; 111.11683; 123.11683; 125.13248; 135.11683; 137.13248; 151.14813; 179.17943; 181.19508; 223.20564; 241.21621	13.00; 17.60; 9.64; 8.71; 9.49; 8.99; 6.64; 6.72; 26.26; 10.57; 9.24; 25.10; 9.32; 17.27; 9.43; 12.86; 9.62; 6.40; 9.51; 14.78; 6.26; 24.18; 11.13; 100.00	41.03858; 43.01784; 43.05423; 55.05423; 57.06988; 59.04914; 61.02841; 67.05423; 69.06988; 71.08553; 73.06479; 81.06988; 83.08553; 85.06479; 93.06988; 95.04914; 95.08553; 97.10118; 103.07536; 107.08553; 109.10118; 111.11683; 123.11683; 137.13248; 139.14813; 241.21621	16.44; 76.30; 40.72; 100.00; 71.26; 19.00; 60.54; 33.42; 98.22; 38.77; 22.67; 70.00; 55.57; 22.25; 32.13; 16.51; 64.85; 34.49; 21.81; 24.14; 45.09; 16.01; 26.10; 17.64; 22.14; 18.78	41.03858; 43.01784; 43.05423; 45.03349; 55.05423; 57.06988; 67.05423; 69.06988; 79.05423; 81.06988; 83.08553; 93.06988; 95.08553	50.54; 69.58; 89.43; 44.93; 88.59; 100.00; 67.00; 52.80; 30.16; 99.28; 27.14; 45.40; 58.80
104	157.15869	156.1514153	C10H20O	CCCCC=CCCCCO	92458	41.03858; 43.05423; 55.05423; 57.06988; 61.06479; 69.06988; 71.08553; 73.06479; 81.06988; 83.08553; 87.08044; 89.09609; 95.08553; 157.15869	36.29; 89.31; 100.00; 60.43; 19.24; 83.69; 44.92; 22.54; 43.65; 48.65; 26.80; 19.72; 20.89; 30.12	41.03858; 43.05423; 55.05423; 57.06988; 69.06988; 71.08553; 83.08553	56.16; 76.44; 87.27; 65.49; 100.00; 46.23; 40.34	41.03858; 43.05423; 45.03349; 55.05423; 57.06988; 69.06988	100.00; 86.47; 37.01; 72.87; 42.04; 43.15
105	149.09609	148.088815	C10H12O	CC=CC1=CC=C(C=C1)OC	7703	121.06479; 149.09609	100.00; 37.54	41.03858; 77.03858; 79.05423; 89.03858; 91.05423; 93.06988; 105.06988; 117.06988; 121.06479; 123.08044; 147.08044; 149.09609	14.50; 31.98; 20.50; 8.43; 22.59; 14.64; 13.61; 29.80; 52.59; 24.03; 20.57; 100.00	39.02293; 51.02293; 63.02293; 65.03858; 67.05423; 75.02293; 77.03858; 79.05423; 89.03858; 91.05423; 147.08044	21.31; 43.08; 22.19; 56.29; 35.52; 35.22; 100.00; 49.28; 36.32; 58.83; 45.30
106	255.23186	254.2245802	C16H30O2	CCCCCCC=CCCCCCCCC(=O)O	4668	55.05423; 57.06988; 67.05423; 69.06988; 79.05423; 81.06988; 83.08553; 89.05971; 93.06988; 95.08553; 97.10118; 107.08553; 109.10118; 111.11683; 115.07536; 121.10118; 123.11683; 125.13248; 135.11683; 137.13248; 139.14813; 149.13248; 163.14813; 219.21073; 237.22129; 255.23186	16.14; 7.66; 5.20; 19.06; 8.44; 30.07; 11.07; 4.41; 7.96; 9.71; 21.55; 5.63; 8.84; 8.08; 4.71; 5.58; 15.06; 8.35; 4.42; 9.77; 5.69; 4.64; 4.52; 10.89; 43.61; 100.00	41.03858; 43.05423; 55.05423; 57.06988; 67.05423; 69.06988; 71.08553; 79.05423; 81.06988; 83.08553; 93.06988; 95.08553; 97.10118; 107.08553; 109.10118; 111.11683; 121.10118; 123.11683; 137.13248; 139.14813; 255.23186	10.81; 10.12; 55.51; 30.39; 18.10; 100.00; 21.22; 18.20; 53.74; 58.21; 26.75; 22.30; 28.50; 21.55; 29.81; 14.44; 14.80; 13.55; 10.76; 19.43; 11.62	41.03858; 43.05423; 55.05423; 57.06988; 67.05423; 69.06988; 79.05423; 81.06988; 83.08553; 93.06988; 95.08553	37.51; 35.17; 100.00; 32.10; 26.55; 69.27; 20.92; 65.96; 18.73; 22.52; 25.80
107	411.39853	410.3912516	C30H50	CC(=CCCC(=CCCC(=CCCC=C(C)CCC=C(C)CCC=C(C)C)C)C)C	1105	69.06988; 81.06988; 83.08553; 95.08553; 111.11683; 119.08553; 123.11683; 131.08553; 133.10118; 135.11683; 137.13248; 149.13248; 151.14813; 179.17943; 189.16378; 191.17943; 203.17943; 231.21073; 233.22638; 259.24203; 275.27333; 289.28898; 299.27333; 301.28898; 325.28898; 327.30463; 341.32028; 343.33593; 355.33593; 369.35158; 411.39853	7.52; 10.16; 9.32; 4.97; 5.20; 7.99; 9.83; 9.93; 10.58; 10.19; 5.46; 7.28; 5.45; 4.63; 7.00; 5.77; 5.47; 6.62; 7.08; 13.90; 4.87; 7.86; 7.07; 4.45; 6.51; 5.58; 4.98; 9.38; 18.61; 7.56; 100.00	69.06988; 81.06988; 83.08553; 93.06988; 95.08553; 105.06988; 107.08553; 109.10118; 133.10118; 135.11683; 137.13248; 147.11683; 149.13248; 179.17943; 181.19508; 189.16378; 191.17943; 201.16378; 273.25768; 297.25768; 299.27333; 325.28898; 327.30463; 339.30463; 341.32028; 343.33593; 353.32028; 355.33593; 367.33593; 369.35158; 371.36723	61.93; 48.42; 34.13; 24.60; 67.26; 42.37; 27.36; 27.68; 38.54; 56.85; 30.88; 55.01; 37.24; 34.03; 23.55; 28.97; 31.00; 28.01; 37.31; 22.80; 42.44; 30.88; 30.62; 23.99; 33.01; 34.62; 42.70; 49.06; 40.78; 100.00; 41.61	69.06988; 79.05423; 81.06988; 83.08553; 91.05423; 93.06988; 95.08553; 105.06988; 107.08553; 109.10118; 119.08553; 133.10118; 135.11683; 137.13248; 147.11683; 149.13248; 187.14813; 189.16378; 201.16378; 213.16378; 215.17943; 217.19508; 269.22638; 297.25768; 325.28898; 327.30463; 337.28898; 343.33593; 353.32028; 355.33593; 395.36723	38.81; 25.71; 33.41; 40.03; 60.19; 27.92; 79.30; 100.00; 68.40; 33.37; 47.44; 98.37; 97.84; 29.44; 68.16; 47.94; 27.58; 24.64; 48.29; 54.55; 48.41; 29.16; 39.13; 21.92; 33.13; 43.40; 39.05; 33.24; 24.44; 21.47; 28.13
108	153.12739	152.1201151	C10H16O	CCCCCC=CC=CC=O	16899	39.02293; 41.03858; 53.03858; 55.05423; 57.03349; 65.03858; 67.05423; 69.06988; 79.05423; 81.06988; 83.08553; 93.06988; 95.08553; 107.08553; 109.10118; 135.11683; 153.12739	21.90; 24.68; 25.25; 51.39; 22.85; 73.18; 53.07; 31.10; 100.00; 61.17; 19.39; 61.45; 24.24; 26.21; 23.34; 18.36; 14.60	39.02293; 41.03858; 53.03858; 55.05423; 57.03349; 65.03858; 67.05423; 69.06988; 71.08553; 79.05423; 81.06988; 91.05423; 93.06988; 95.08553	37.01; 45.12; 52.89; 93.72; 39.10; 100.00; 68.89; 47.83; 24.67; 90.84; 94.22; 33.84; 49.05; 38.95	39.02293; 41.03858; 43.05423; 53.03858; 55.05423; 63.02293; 65.03858; 67.05423; 69.06988; 79.05423; 81.06988; 91.05423; 93.06988	72.40; 31.35; 29.18; 25.84; 63.07; 19.48; 47.73; 100.00; 18.47; 61.08; 74.40; 31.05; 24.49
109	253.21621	252.2089301	C16H28O2	CC=CCC=CCCCCCCCCOC(=O)C	92280	43.01784; 53.03858; 55.05423; 61.02841; 65.03858; 67.05423; 69.06988; 79.05423; 81.06988; 83.08553; 93.06988; 95.08553; 97.10118; 107.08553; 109.10118; 111.11683; 115.07536; 119.08553; 121.10118; 123.11683; 133.10118; 135.11683; 137.13248; 163.14813; 191.17943; 193.19508; 235.20564; 253.21621	15.66; 6.34; 20.63; 11.80; 11.10; 14.12; 13.70; 39.59; 37.68; 9.43; 41.19; 39.73; 14.59; 12.36; 23.30; 7.01; 7.54; 5.97; 25.74; 32.72; 9.49; 11.26; 19.14; 6.69; 7.73; 24.13; 11.46; 100.00	41.03858; 43.01784; 53.03858; 55.05423; 57.06988; 61.02841; 65.03858; 67.05423; 69.06988; 79.05423; 81.06988; 83.08553; 91.05423; 93.06988; 95.08553; 97.10118; 105.06988; 107.08553; 109.10118; 119.08553; 121.10118; 123.11683; 133.10118; 135.11683; 137.13248; 151.14813; 253.21621	10.16; 58.40; 20.72; 94.80; 26.94; 23.72; 28.68; 63.36; 62.08; 55.17; 73.97; 47.89; 19.28; 100.00; 82.82; 30.43; 12.70; 50.44; 63.89; 20.20; 46.24; 21.46; 12.21; 11.70; 12.67; 11.53; 23.07	41.03858; 43.01784; 45.03349; 53.03858; 55.05423; 65.03858; 67.05423; 69.06988; 79.05423; 81.06988; 83.08553; 91.05423; 93.06988; 95.08553	21.67; 34.26; 17.65; 20.21; 53.30; 19.96; 74.98; 49.53; 45.85; 100.00; 15.50; 13.24; 40.12; 54.48
110	217.11962	216.1123444	C10H12N6	C(CN(CC#N)CC#N)N(CC#N)CC#N	21984	122.07127; 217.11962	13.42; 100.00	81.04472; 96.05562; 122.07127; 190.10872; 217.11962	18.30; 28.98; 100.00; 13.07; 71.33	40.01818; 69.04472; 81.04472; 83.06037; 96.05562; 122.07127	100.00; 15.30; 13.78; 33.64; 26.10; 24.12
111	155.06375	154.0564695	C7H10N2S	CC1=CN=C(C(=N1)C)SC	55251157	107.06037; 155.06375	13.58; 100.00	41.03858; 42.03383; 66.03383; 68.04948; 80.04948; 82.06513; 84.08078; 107.06037; 112.02155; 128.05285; 138.03720; 155.06375	11.53; 20.95; 11.04; 12.53; 8.42; 23.78; 7.52; 10.70; 7.18; 22.88; 7.48; 100.00	39.02293; 41.03858; 42.03383; 44.97935; 52.01818; 56.04948; 61.01065; 66.03383; 68.04948; 71.99025; 80.04948; 82.06513; 86.00590; 107.06037; 112.02155; 128.05285	27.64; 38.37; 100.00; 40.70; 17.20; 21.81; 90.64; 91.38; 69.54; 23.64; 61.81; 28.36; 19.43; 37.69; 16.55; 40.86
112	150.07742	149.0701452	C6H7N5	CNC1=NC=NC2=C1NC=N2	67955	108.05562; 150.07742	0.22; 100.00	133.05087; 150.07742	5.30; 100.00	42.03383; 52.01818; 53.01342; 55.02907; 65.01342; 67.02907; 69.04472; 79.02907; 81.04472; 82.03997; 92.02432; 94.03997; 106.03997; 107.03522; 109.05087	36.63; 27.25; 19.64; 24.39; 39.34; 45.60; 38.75; 21.25; 38.91; 25.22; 60.77; 84.43; 34.47; 100.00; 20.66
113	419.17706	418.1697817	C26H27O3P	CC1=CC(=C(C(=C1)C)C(=O)P(=O)(C2=CC=CC=C2)C(=O)C3=C(C=C(C=C3C)C)C)C	164512	147.08044; 271.08824; 299.08316; 419.17706	34.56; 34.43; 73.21; 100.00	119.08553; 147.08044; 271.08824; 273.10389; 417.16141; 419.17706	15.24; 11.35; 100.00; 10.87; 10.88; 35.46	119.08553; 125.01508; 131.04914; 145.06479; 257.07259; 271.08824	24.96; 100.00; 11.06; 13.27; 25.72; 13.91
114	326.24784	325.2405646	C22H31NO	CC1=CC(=C(C=C1)O)C(CCN(C(C)C)C(C)C)C2=CC=CC=C2	5512	114.12773; 119.08553; 211.11174; 218.19033; 225.12739; 0.0073885; 284.20089; 326.24784	2.24; 2.67; 3.30; 3.88; 9.41; 0.0048918; 2.04; 100.00	72.08078; 86.09643; 91.05423; 93.06988; 98.09643; 100.11208; 107.04914; 109.06479; 114.12773; 116.14338; 117.06988; 119.08553; 121.06479; 176.14338; 178.15903; 197.09609; 199.11174; 202.15903; 204.17468; 211.11174; 218.19033; 225.12739; 248.20089; 266.19033; 268.20598; 282.18524; 284.20089; 298.25293; 310.21654; 324.23219; 326.24784; 0.071174	38.68; 18.85; 41.85; 10.69; 9.15; 24.64; 14.86; 20.85; 27.28; 9.68; 52.12; 21.81; 9.57; 11.32; 10.62; 10.08; 11.42; 27.30; 10.84; 14.02; 8.09; 34.70; 9.44; 10.50; 7.78; 26.35; 25.93; 9.50; 41.63; 18.95; 100.00; 0.043967	58.06513; 72.08078; 79.05423; 82.06513; 86.09643; 91.05423; 93.06988; 100.11208; 107.04914; 109.06479; 115.05423; 117.06988; 119.04914; 119.08553; 121.06479; 143.04914; 145.06479; 147.08044; 169.10118; 181.10118; 195.08044; 197.09609; 199.11174; 204.17468; 206.15394; 207.11683; 209.09609; 211.11174; 225.12739; 227.14304; 326.24784	7.82; 19.03; 38.14; 8.14; 30.17; 100.00; 20.69; 7.21; 18.82; 22.06; 9.11; 22.55; 6.68; 14.48; 7.68; 6.27; 10.39; 15.85; 14.22; 6.13; 24.50; 22.99; 11.98; 6.70; 6.20; 8.52; 5.86; 6.26; 23.60; 11.64; 7.86
115	90.09134	89.08406397	C4H11NO	CCC(CO)N	22129	72.08078; 90.09134	100.00; 28.45	55.05423; 72.08078	100.00; 85.67	41.03858; 42.03383; 44.04948; 55.05423; 72.08078	35.36; 32.55; 52.80; 100.00; 30.72
116	137.13248	136.1252005	C10H16	CC1=CCC(C=C1)C(C)C	7460	43.05423; 69.06988; 79.05423; 81.06988; 93.06988; 95.08553; 107.08553; 109.10118; 137.13248	30.56; 23.91; 52.45; 100.00; 49.33; 73.05; 20.02; 17.61; 91.87	39.02293; 43.05423; 53.03858; 55.05423; 69.06988; 79.05423; 81.06988; 83.08553; 93.06988; 95.08553; 97.10118	33.79; 21.84; 14.58; 21.67; 40.03; 100.00; 68.32; 27.00; 91.37; 20.88; 43.93	41.03858; 43.05423; 53.03858; 65.03858; 67.05423; 77.03858; 79.05423; 93.06988; 105.06988; 121.10118; 135.11683	55.50; 65.86; 100.00; 35.36; 52.21; 54.03; 84.73; 55.28; 22.91; 22.19; 30.03
117	409.29485	408.2875744	C24H40O5	CCCC1(CCC1)C(CC=CC2C(CC(=O)C2CCCCCCC(=O)OC)O)O	53394153	55.05423; 69.06988; 87.08044; 167.14304; 241.17982; 249.14852; 251.16417; 261.18491; 263.16417; 265.17982; 267.15909; 281.17474; 303.23186; 305.24751; 333.24242; 335.25807; 337.27372; 347.22169; 347.25807; 349.23734; 359.25807; 361.23734; 361.27372; 363.25299; 365.26864; 373.27372; 377.26864; 381.26355; 391.28429; 409.29485	3.95; 3.78; 3.62; 3.18; 3.63; 10.59; 5.27; 3.71; 12.84; 6.45; 7.23; 6.45; 4.26; 6.03; 3.60; 7.40; 7.95; 7.20; 3.21; 29.70; 45.51; 11.97; 7.67; 31.70; 4.00; 100.00; 11.02; 6.81; 49.23; 18.45	43.05423; 55.05423; 69.06988; 97.10118; 99.11683; 139.07536; 235.13287; 245.15361; 249.14852; 249.18491; 259.16926; 261.18491; 263.16417; 263.20056; 265.17982; 267.15909; 275.20056; 317.24751; 335.25807; 337.27372; 347.22169; 349.23734; 359.25807; 361.23734; 363.25299; 369.26355; 373.27372; 381.26355; 391.28429; 407.27920; 409.29485	9.61; 23.80; 14.13; 11.21; 9.73; 16.44; 9.17; 14.77; 13.08; 14.89; 10.99; 15.43; 10.13; 20.32; 10.27; 9.40; 11.93; 15.87; 11.84; 21.32; 11.43; 10.59; 18.79; 11.79; 8.81; 11.12; 100.00; 21.33; 34.83; 28.43; 16.61	41.03858; 43.05423; 55.05423; 67.05423; 69.06988; 79.05423; 81.06988; 83.04914; 83.08553; 93.06988; 95.04914; 95.08553; 97.10118; 107.04914; 109.06479; 121.06479; 123.08044; 133.10118; 135.08044; 139.07536; 159.11683; 181.08592; 185.11722; 245.15361; 249.18491; 313.20095; 347.22169; 361.23734; 381.26355; 391.28429; 393.26355	29.80; 56.74; 90.47; 54.88; 52.33; 28.36; 100.00; 21.77; 24.95; 43.93; 18.55; 35.80; 25.43; 25.42; 20.13; 30.18; 19.44; 26.61; 15.92; 27.75; 44.78; 15.24; 22.66; 18.22; 24.07; 19.84; 32.99; 23.02; 17.79; 22.14; 19.06
118	272.13935	271.1320768	C15H17N3O2	C1CN2CCC1C(C2)NC(=O)C3=NC=C4C(=C3)C=CO4	16725588	146.02365; 272.13935; 0.01202	27.15; 100.00; 0.0099089	110.09643; 125.10732; 127.12297; 244.14444; 272.13935	49.61; 22.83; 21.09; 9.04; 100.00	92.04948; 93.03349; 102.03383; 106.02874; 106.06513; 108.08078; 110.09643; 118.02874; 119.01276; 120.04439; 121.07602; 123.09167; 124.07569; 125.10732; 126.09134; 127.12297; 135.05529; 135.09167; 146.02365; 228.11314; 230.12879; 244.14444; 246.12370; 255.11280	11.74; 5.25; 4.94; 5.36; 13.84; 19.39; 100.00; 19.33; 4.46; 9.99; 2.93; 5.97; 3.55; 6.48; 3.86; 6.37; 7.31; 3.00; 18.70; 3.61; 5.07; 6.62; 3.92; 3.14
119	201.067	200.0597203	C8H9FN2O3	C1CC(OC1)N2C=C(C(=O)NC2=O)F	5386	53.03858; 71.04914; 103.03022; 131.02513	44.67; 100.00; 39.70; 93.99	41.03858; 43.01784; 43.05423; 53.03858; 71.04914; 86.00367; 103.03022; 131.02513	19.06; 15.94; 37.66; 44.54; 97.88; 21.52; 23.77; 100.00	41.03858; 44.01309; 45.01350; 47.02915; 53.03858; 56.01309; 58.00875; 60.02440; 61.00842; 62.04005; 69.03349; 71.04914; 72.02440; 80.04948; 86.00367; 86.06004; 88.01932; 96.04439; 98.06004; 103.03022; 110.06004; 112.05570; 113.03455; 115.03022; 126.03497; 128.05062; 130.06627; 131.02513; 143.02513; 147.05643; 159.02005	30.25; 27.55; 47.80; 51.88; 51.28; 45.58; 25.00; 100.00; 22.19; 26.74; 25.25; 27.94; 54.93; 41.59; 36.96; 17.36; 57.53; 31.22; 19.19; 61.18; 48.43; 29.77; 34.78; 45.71; 16.84; 49.02; 34.61; 77.76; 41.60; 24.15; 34.12
120	420.1361	419.1288213	C25H22ClNO3	CC(C)C(C1=CC=C(C=C1)Cl)C(=O)OC(C#N)C2=CC(=CC=C2)OC3=CC=CC=C3	3347	125.01525; 153.01017; 167.06220; 195.05712; 208.07569; 210.09134; 226.08626; 393.12520; 420.13610	21.39; 57.20; 52.23; 42.04; 100.00; 16.96; 24.00; 40.04; 80.29	125.01525; 148.03930; 150.99452; 153.01017; 165.04655; 167.06220; 177.04655; 193.04147; 195.05712; 199.07536; 208.07569; 224.07060; 226.08626; 420.13610	100.00; 10.85; 11.39; 17.68; 10.79; 69.65; 8.23; 14.24; 27.75; 20.04; 57.69; 8.13; 48.22; 17.51	79.05423; 116.04948; 125.01525; 127.03090; 132.04439; 148.03930; 150.99452; 153.01017; 158.06004; 165.04655; 167.06220; 171.08044; 179.02582; 181.04147; 183.08044; 199.07536; 208.07569; 210.09134; 0.032616); 224.07060; 226.08626; 420.13610	16.85; 12.52; 100.00; 20.15; 15.40; 6.99; 14.53; 6.59; 5.95; 6.79; 7.28; 5.99; 20.95; 16.97; 8.11; 8.45; 80.09; 8.43; ; 16.84; 14.24; 10.28
121	265.14344	264.1361591	C15H20O4	CC1=CC(=O)CC(C1(C=CC(=CC(=O)O)C)O)(C)C	287291	137.09609; 161.09609; 179.10666; 187.11174; 201.12739; 203.14304; 205.12231; 219.13796; 223.13287; 229.12231; 247.13287; 265.14344	6.57; 5.90; 7.21; 45.27; 54.81; 17.03; 23.79; 17.75; 5.24; 45.74; 100.00; 19.78	41.00219; 41.03858; 43.01784; 83.04914; 95.04914; 107.08553; 109.06479; 121.06479; 123.08044; 125.09609; 135.04406; 135.08044; 137.09609; 151.07536; 153.09101; 177.09101; 181.08592; 183.10157; 185.09609; 187.11174; 201.12739; 203.10666; 203.14304; 205.08592; 207.10157; 219.10157; 219.13796; 223.09649; 229.12231; 247.13287; 265.14344	14.76; 11.95; 29.28; 26.96; 22.42; 11.29; 13.20; 11.39; 11.07; 17.35; 12.18; 55.11; 17.04; 23.09; 37.92; 17.47; 17.82; 17.70; 15.45; 48.22; 100.00; 17.35; 32.56; 11.19; 14.08; 13.50; 32.99; 16.07; 67.70; 61.46; 18.76	39.02293; 41.00219; 41.03858; 43.01784; 43.05423; 53.03858; 55.05423; 57.06988; 65.03858; 67.05423; 81.03349; 83.04914; 93.03349; 95.04914; 97.06479; 119.04914; 121.06479; 123.08044; 125.09609; 127.11174; 135.08044; 137.09609; 143.07027; 161.05971; 161.09609; 163.07536; 167.07027; 179.10666; 183.10157; 189.09101; 231.10157	17.82; 13.38; 48.90; 40.12; 21.12; 49.28; 36.72; 30.86; 23.86; 29.56; 16.67; 58.80; 12.88; 42.47; 100.00; 16.97; 47.39; 13.31; 12.74; 34.14; 15.85; 16.24; 12.41; 13.14; 25.11; 20.04; 52.03; 18.83; 28.29; 28.30; 17.97
122	157.15869	156.1514153	C10H20O	CC(CCC=C(C)C)CCO	8842	55.05423; 69.06988; 71.08553; 81.06988; 83.08553; 95.08553; 101.09609; 109.10118; 111.11683; 139.14813	67.67; 59.39; 29.27; 15.32; 100.00; 16.73; 35.23; 13.64; 25.13; 20.55	41.03858; 43.05423; 55.05423; 69.06988; 83.08553; 85.10118	9.41; 14.57; 24.05; 19.88; 100.00; 8.74	39.02293; 41.03858; 43.05423; 55.05423; 67.05423; 69.06988; 83.08553	30.89; 100.00; 49.91; 41.94; 28.20; 26.60; 20.84
123	104.10699	103.099714	C5H13NO	CC(CN(C)C)O	37511	86.09643; 104.10699	12.41; 100.00	58.06513; 86.09643	83.22; 100.00	44.04948; 58.06513	12.72; 100.00
124	139.14813	138.1408506	C10H18	CC(CCC=C(C)C)C=C	17090	55.05423; 57.06988; 67.05423; 69.06988; 71.08553; 81.06988; 83.08553; 95.08553	75.37; 22.18; 15.97; 42.81; 17.95; 60.80; 100.00; 13.18	41.03858; 43.05423; 55.05423; 57.06988; 67.05423; 69.06988; 81.06988; 83.08553	35.64; 17.60; 66.73; 17.82; 36.27; 51.83; 100.00; 73.14	41.03858; 43.05423; 55.05423; 67.05423; 69.06988; 79.05423; 81.06988	51.93; 27.43; 100.00; 16.47; 26.20; 12.72; 19.56
125	137.13248	136.1252005	C10H16	CC1=CCC(CC1)C(=C)C	22311	41.03858; 55.05423; 81.06988; 95.08553; 97.10118; 109.10118; 135.11683; 137.13248	39.33; 15.25; 61.99; 58.53; 43.40; 15.81; 29.11; 100.00	39.02293; 41.03858; 55.05423; 65.03858; 67.05423; 79.05423; 81.06988; 83.08553; 93.06988; 95.08553; 121.10118; 135.11683	27.78; 43.17; 50.60; 22.79; 21.24; 57.92; 81.47; 20.10; 37.23; 100.00; 21.35; 18.79	39.02293; 41.03858; 55.05423; 65.03858; 67.05423; 77.03858; 79.05423; 81.06988; 93.06988	47.51; 95.30; 65.96; 49.55; 62.26; 92.90; 100.00; 60.85; 71.51
126	219.1128	218.1055277	C12H14N2O2	CCC1(C(=O)N(C(=O)N1)C)C2=CC=CC=C2	4060	134.09643; 219.11280	16.29; 100.00	42.03383; 56.04948; 58.02874; 79.05423; 117.06988; 119.08553; 130.06513; 132.08078; 134.09643; 136.11208; 162.09134; 191.11789; 219.11280	6.95; 14.70; 11.95; 7.57; 52.28; 20.51; 7.78; 27.08; 100.00; 11.52; 13.10; 12.71; 18.37	56.04948; 58.02874; 79.05423; 91.05423; 115.05423; 117.06988; 130.06513; 132.08078; 134.09643; 217.09715	20.64; 14.03; 31.33; 83.73; 100.00; 71.57; 11.65; 32.45; 39.37; 10.93
127	317.16419	316.1569118	C13H24N4O3S	CC(C)(C)NCC(COC1=NSN=C1N2CCOCC2)O	5478	299.15362; 317.16419	6.88; 100.00	56.04948; 57.06988; 74.06004; 88.07569; 112.11208; 130.12264; 188.04882; 202.06447; 243.09102; 244.07504; 261.10159; 299.15362; 301.13289; 315.14854	10.82; 17.18; 61.46; 29.41; 26.39; 13.69; 29.19; 14.39; 28.25; 19.53; 98.55; 14.33; 29.88; 25.43	55.05423; 56.04948; 57.06988; 58.06513; 72.04439; 74.06004; 88.07569; 96.04439; 98.06004; 100.07569; 101.01680; 102.05495; 111.05529; 112.11208; 113.07094; 114.12773; 130.12264; 144.02261; 145.04301; 170.03826; 172.05391; 189.04407; 201.06923; 203.08488; 226.06447; 244.07504; 245.10667; 273.13797; 299.15362; 300.13764	3.73; 6.28; 100.00; 8.22; 6.31; 57.07; 3.39; 3.71; 12.11; 8.82; 7.22; 3.80; 3.46; 25.95; 13.26; 7.77; 7.04; 10.52; 4.75; 6.20; 6.27; 3.77; 4.54; 9.87; 4.86; 3.36; 3.58; 7.74; 4.84; 4.99
128	239.23694	238.2296656	C16H30O	CCCCC=CCCCCCCCCCC=O	62073	55.05423; 57.06988; 67.05423; 69.06988; 71.08553; 79.05423; 81.06988; 83.08553; 93.06988; 95.08553; 97.10118; 99.08044; 107.08553; 109.10118; 111.11683; 121.10118; 123.11683; 125.13248; 135.11683; 137.13248; 139.14813; 165.16378; 221.22638; 239.23694	23.89; 10.40; 8.21; 37.20; 6.72; 17.08; 31.86; 28.42; 17.35; 29.08; 29.80; 5.68; 10.14; 20.96; 14.33; 6.69; 19.69; 9.34; 5.37; 9.37; 6.45; 5.42; 13.41; 100.00	41.03858; 55.05423; 57.06988; 67.05423; 69.06988; 71.08553; 79.05423; 81.06988; 83.08553; 93.06988; 95.08553; 97.10118; 107.08553; 109.10118; 111.11683; 121.10118; 123.11683	15.96; 66.58; 25.86; 18.67; 100.00; 21.09; 23.29; 37.17; 68.65; 34.79; 40.94; 39.35; 21.52; 26.57; 15.19; 15.76; 13.98	41.03858; 43.05423; 53.03858; 55.05423; 57.06988; 67.05423; 69.06988; 79.05423; 81.06988; 83.08553; 93.06988; 95.08553	45.00; 20.12; 10.46; 100.00; 28.05; 23.91; 71.15; 19.96; 36.38; 18.43; 21.88; 22.37
129	101.09609	100.088815	C6H12O	CCC=CCCO	10993	39.02293; 41.03858; 55.05423; 69.06988; 83.08553	37.56; 91.36; 100.00; 96.68; 80.22	41.03858; 55.05423; 83.08553	14.09; 100.00; 8.70	39.02293; 41.03858; 55.05423	58.99; 49.91; 100.00
130	388.22711	387.2198292	C26H29NO2	CCC(=C(C1=CC=C(C=C1)O)C2=CC=C(C=C2)OCCN(C)C)C3=CC=CC=C3	63062	72.08078; 272.16451; 388.22711	9.15; 9.69; 100.00	44.04948; 72.08078; 117.06988; 119.08553; 121.10118; 266.11756; 270.14886; 272.16451; 310.18016; 317.15361; 343.16926; 388.22711	6.04; 100.00; 5.99; 7.32; 6.50; 6.47; 18.18; 20.25; 4.91; 8.81; 12.53; 88.17	42.03383; 44.04948; 46.06513; 70.06513; 72.08078; 79.05423; 81.06988; 91.05423; 115.05423; 117.06988; 119.08553; 123.11683; 199.07536; 336.19581; 372.19581; 388.22711	4.39; 4.76; 2.50; 4.19; 100.00; 1.94; 1.90; 10.05; 2.31; 3.88; 7.56; 3.18; 2.50; 2.25; 3.12; 2.46
131	129.12739	128.1201151	C8H16O	CCC=CCCCCO	62231	41.03858; 43.05423; 55.05423; 57.06988; 59.04914; 61.06479; 69.06988; 81.06988; 83.08553; 97.10118; 111.11683	63.61; 63.57; 100.00; 38.91; 54.98; 27.27; 64.93; 41.05; 40.45; 19.87; 19.83	41.03858; 55.05423; 57.06988; 69.06988; 83.08553	32.75; 100.00; 33.53; 69.77; 30.84	39.02293; 41.03858; 43.05423; 55.05423; 67.05423; 69.06988	39.34; 65.16; 25.13; 100.00; 14.91; 17.21
132	268.29988	267.2926002	C18H37N	CCCCCCCCC=CCCCCCCCCN	8219	43.05423; 55.05423; 57.06988; 69.06988; 71.08553; 72.08078; 83.08553; 85.10118; 97.10118; 125.13248; 140.14338; 142.15903; 251.27333; 268.29988	4.82; 2.29; 8.77; 1.67; 6.05; 1.93; 2.50; 3.26; 2.41; 4.52; 2.10; 1.90; 5.61; 100.00	41.03858; 43.05423; 55.05423; 57.06988; 58.06513; 60.08078; 69.06988; 71.08553; 72.08078; 74.09643; 81.06988; 83.08553; 85.10118; 95.08553; 97.10118; 109.10118; 111.11683; 125.13248; 128.14338; 130.15903; 139.14813; 251.27333; 268.29988	8.54; 28.92; 20.64; 68.24; 12.97; 18.64; 18.50; 56.00; 8.81; 10.91; 7.92; 19.16; 14.35; 9.23; 21.21; 9.47; 8.56; 16.03; 11.56; 21.54; 9.13; 19.27; 100.00	41.03858; 43.05423; 44.04948; 55.05423; 57.06988; 58.06513; 69.06988; 71.08553; 72.08078; 81.06988; 83.08553; 95.08553	32.88; 96.75; 13.60; 49.57; 100.00; 13.14; 25.35; 30.41; 16.62; 20.98; 17.49; 18.89
133	418.33157	417.3242942	C26H43NO3	CCCCCCCCC=CCCCCCCCC(=O)NCC1=CC(=C(C=C1)O)OC	42760	137.05971; 418.33157	100.00; 31.23	79.01784; 81.03349; 81.06988; 83.04914; 93.06988; 105.03349; 107.04914; 109.06479; 122.06004; 135.04406; 137.05971; 137.13248; 154.08626; 418.33157	2.97; 2.86; 1.69; 1.93; 2.24; 11.28; 4.24; 16.99; 4.41; 2.42; 100.00; 1.75; 7.86; 4.06	51.02293; 53.03858; 65.03858; 67.05423; 68.04948; 81.06988; 93.06988; 95.08553; 105.03349; 107.04914; 109.06479; 121.06479; 135.04406; 137.05971; 139.07536; 152.07060	1.81; 2.73; 8.48; 4.99; 1.77; 3.57; 3.73; 2.44; 7.89; 3.42; 5.70; 2.13; 1.93; 100.00; 2.17; 6.97
134	155.14304	154.1357652	C10H18O	CC(=CCCC(=CCO)C)C	4458	55.05423; 67.05423; 69.06988; 81.06988; 83.08553; 99.08044; 111.11683; 137.13248	50.91; 18.47; 52.59; 100.00; 28.03; 14.60; 31.92; 11.68	39.02293; 41.03858; 55.05423; 67.05423; 69.06988; 79.05423; 81.06988; 83.08553; 95.08553	12.86; 57.62; 74.37; 26.68; 52.61; 12.77; 100.00; 73.74; 20.54	39.02293; 41.03858; 55.05423; 67.05423; 69.06988; 79.05423; 81.06988; 93.06988	50.51; 100.00; 42.33; 55.79; 35.20; 35.69; 29.06; 28.35
135	269.15361	268.1463299	C18H20O2	CCC(=C(CC)C1=CC=C(C=C1)O)C2=CC=C(C=C2)O	3054	107.04914; 135.08044; 137.09609; 241.12231; 269.15361	10.87; 28.18; 57.49; 7.03; 100.00	105.03349; 105.06988; 107.04914; 107.08553; 117.06988; 119.08553; 133.06479; 135.08044; 137.09609; 139.11174; 145.06479; 147.08044; 175.11174; 211.07536; 239.10666; 253.12231; 269.15361	26.89; 16.46; 11.63; 15.38; 6.56; 9.36; 45.31; 62.40; 42.78; 12.68; 9.87; 20.46; 19.22; 6.22; 11.65; 9.28; 100.00	57.03349; 79.05423; 81.06988; 93.06988; 99.08044; 105.03349; 105.06988; 107.04914; 107.08553; 115.05423; 117.06988; 119.08553; 121.06479; 135.08044; 139.11174; 141.03349; 143.04914; 145.06479; 199.11174; 201.12739; 209.09609; 211.07536; 211.11174; 223.11174; 225.09101; 225.12739; 237.09101; 237.12739; 239.10666; 239.14304; 269.15361	17.55; 19.57; 22.51; 19.08; 15.84; 40.49; 16.84; 28.22; 56.11; 18.06; 16.70; 29.41; 22.33; 51.76; 15.99; 22.07; 100.00; 67.86; 17.12; 29.06; 16.44; 16.12; 42.94; 26.88; 16.96; 31.74; 25.50; 16.95; 28.42; 24.28; 15.91
136	450.10783	449.1005556	C23H19ClF3NO3	CC1(C(C1C(=O)OC(C#N)C2=CC(=CC=C2)OC3=CC=CC=C3)C=C(C(F)(F)F)Cl)C	443046	95.04914; 208.07569; 0.00072534); 225.02885; 423.09693; 450.10783	38.26; 78.06; ; 32.38; 30.71; 100.00	67.05423; 95.04914; 107.04914; 183.08044; 199.07536; 207.01829; 208.07569; 223.01320; 225.02885; 226.08626; 227.07027; 266.08117; 268.09682; 293.11722; 332.12812; 408.06088; 423.09693; 450.10783	8.09; 87.34; 8.07; 16.36; 9.05; 19.39; 76.79; 10.61; 27.78; 18.17; 9.48; 9.66; 8.76; 15.39; 7.71; 7.93; 11.55; 100.00	41.03858; 43.05423; 55.05423; 77.03858; 79.05423; 83.04914; 85.06479; 90.03383; 95.04914; 107.04914; 109.06479; 116.04948; 128.97134; 132.04439; 148.03930; 156.04439; 158.06004; 171.08044; 180.04439; 182.06004; 183.08044; 197.03394; 199.07536; 208.07569; 210.09134; 0.0080066); 224.07060; 226.08626; 239.00812; 288.10191; 408.06088; 450.10783	36.90; 8.56; 8.39; 22.39; 7.89; 26.58; 11.59; 28.53; 19.07; 16.72; 12.53; 30.61; 15.80; 36.05; 7.75; 21.63; 23.44; 9.02; 8.52; 8.19; 23.86; 13.96; 12.87; 100.00; 7.55; ; 14.24; 31.91; 8.09; 15.84; 8.83; 20.42
137	153.12739	152.1201151	C10H16O	CC1=CCC(C1(C)C)CC=O	98497	69.06988; 81.06988; 83.08553; 93.06988; 95.08553; 107.08553; 109.10118; 123.11683	44.06; 25.47; 29.65; 59.40; 13.33; 71.81; 100.00; 20.57	41.03858; 43.01784; 55.05423; 67.05423; 69.06988; 79.05423; 81.06988; 83.08553; 91.05423; 93.06988; 95.08553; 107.08553; 109.10118; 123.11683; 135.11683; 151.11174	30.74; 31.02; 45.30; 26.85; 48.25; 20.12; 47.82; 34.54; 54.29; 66.11; 50.37; 38.32; 100.00; 27.58; 17.40; 19.72	39.02293; 41.03858; 43.05423; 53.03858; 55.05423; 67.05423; 69.06988; 77.03858; 79.05423; 81.06988; 91.05423; 93.06988; 95.08553; 109.10118	44.60; 73.77; 27.91; 42.61; 58.15; 41.63; 58.07; 24.98; 100.00; 67.89; 34.80; 51.32; 48.16; 24.86
138	155.14304	154.1357652	C10H18O	CC1(C2CCC1(C(C2)O)C)C	64685	45.03349; 67.05423; 69.06988; 81.06988; 109.10118; 111.11683; 113.13248; 137.13248; 155.14304	21.17; 20.07; 32.29; 27.43; 96.76; 100.00; 19.85; 30.43; 20.93	55.05423; 67.05423; 69.06988; 71.08553; 81.06988; 83.08553; 85.10118; 93.06988; 95.08553; 109.10118; 111.11683	26.68; 13.82; 37.81; 13.00; 32.15; 22.24; 11.34; 33.19; 23.74; 23.33; 100.00	29.03858; 41.03858; 43.05423; 55.05423; 67.05423; 69.06988; 81.06988; 83.08553; 93.06988; 95.08553; 109.10118	12.26; 19.61; 13.75; 11.95; 28.31; 35.87; 11.44; 14.65; 100.00; 19.73; 22.07
139	186.05251	185.0452337	C9H6F3N	C1=CC(=CC(=C1)C(F)(F)F)CC#N	75360	184.03686; 186.05251	8.72; 100.00	159.04161; 186.05251	14.99; 100.00	39.02293; 40.01818; 51.02293; 65.03858; 66.03383; 90.03383; 116.04948; 121.02596; 158.02121; 159.04161; 160.03686; 166.04628; 184.03686	16.38; 14.26; 11.91; 27.03; 18.17; 37.80; 23.61; 8.86; 13.41; 100.00; 41.38; 23.96; 18.31
140	159.10157	158.0942943	C8H14O3	C=COCCOCCOC=C	12998	43.01784; 45.03349; 69.03349; 71.04914; 115.07536	26.42; 72.11; 53.99; 100.00; 28.51	43.01784; 45.03349; 57.03349; 59.04914; 69.03349; 71.04914; 73.06479	25.61; 67.68; 13.68; 24.21; 23.04; 100.00; 18.75	43.01784; 45.03349; 69.03349; 71.04914	19.88; 100.00; 12.03; 43.99
141	472.06587	471.0585984	C21H17F4NO3S2	CC1=C(C=CC(=C1)SCC2=C(N=C(S2)C3=CC(=C(C=C3)C(F)(F)F)F)C)OCC(=O)O	9934458	454.05531; 472.06587	11.65; 100.00	274.03081; 384.04983; 394.03418; 396.04983; 398.06548; 400.08113; 412.04475; 426.06040; 431.03933; 452.05965; 454.05531; 472.06587	18.70; 5.23; 5.79; 11.70; 20.89; 7.14; 5.95; 16.54; 5.15; 10.74; 43.21; 100.00	204.02777; 206.04342; 206.98861; 238.01550; 240.04309; 248.01516; 254.02458; 256.04023; 260.01516; 262.03081; 272.01516; 274.03081; 276.04646; 308.01853; 394.03418; 472.06587; 0.074557	3.95; 41.48; 6.15; 5.26; 3.62; 3.38; 8.26; 6.35; 8.50; 3.10; 11.51; 100.00; 12.92; 5.78; 5.63; 8.68; 0.042477
142	171.13796	170.1306798	C10H18O2	C=COCC1CCC(CC1)CO	163934	81.06988; 95.08553; 97.10118; 109.10118; 113.09609; 127.11174; 139.11174; 171.13796	18.84; 77.51; 60.81; 96.63; 19.65; 100.00; 20.31; 85.07	55.05423; 57.03349; 59.04914; 71.04914; 81.06988; 83.08553; 93.06988; 95.08553; 97.06479; 97.10118; 109.10118; 113.09609; 125.09609; 127.11174; 139.11174; 141.12739; 153.12739; 171.13796	50.66; 100.00; 19.94; 18.40; 15.59; 21.89; 15.17; 49.39; 18.46; 55.21; 40.75; 41.95; 17.78; 54.02; 14.22; 19.48; 34.97; 67.06	41.00219; 41.03858; 43.01784; 45.03349; 55.05423; 57.03349; 69.06988; 71.04914; 81.06988; 83.04914; 83.08553; 93.06988; 95.08553; 97.10118; 107.08553; 109.10118; 127.11174; 141.09101; 143.10666	38.94; 12.95; 38.91; 16.51; 37.28; 100.00; 15.00; 12.85; 8.46; 18.51; 9.18; 17.75; 14.12; 12.81; 17.24; 7.88; 8.08; 6.80; 11.69
143	462.23514	461.2278689	C28H29F2N3O	C1CN(CCC1N2C3=CC=CC=C3NC2=O)CCCC(C4=CC=C(C=C4)F)C5=CC=C(C=C5)F	16362	135.05529; 462.23515	5.97; 100.00	245.11363; 258.16009; 328.18713; 366.19762; 417.21368; 419.22933; 434.24023; 442.22892; 462.23515	4.61; 4.06; 8.39; 4.26; 16.50; 17.47; 3.70; 3.67; 100.00	95.02915; 96.08078; 98.09643; 99.06045; 101.07610; 103.09176; 107.06037; 119.06037; 124.11208; 135.05529; 147.06045; 147.09167; 149.07610; 173.07094; 199.08659; 203.06668; 203.11789; 217.08233; 223.12928; 230.13395; 231.09798; 232.14960; 260.12453; 328.18713; 380.21327; 392.21327; 417.21368; 419.22933; 434.20385; 436.21950; 442.22892	18.90; 16.89; 22.40; 14.59; 23.58; 19.96; 21.64; 14.92; 19.93; 18.19; 52.56; 20.29; 100.00; 17.11; 18.60; 68.98; 18.93; 53.78; 14.54; 34.26; 28.36; 47.28; 18.02; 38.86; 14.96; 49.15; 57.84; 38.56; 34.27; 37.38; 19.58
144	203.06375	202.0564695	C11H10N2S	C1=CC=C2C(=C1)C=CC=C2NC(=S)N	736366	144.08078; 203.06375	29.48; 100.00	186.03720; 203.06375	57.27; 100.00	75.02293; 77.03858; 91.05423; 101.03858; 103.05423; 115.05423; 117.06988; 186.03720	20.62; 35.63; 25.39; 18.26; 18.63; 100.00; 23.39; 50.48
145	321.01921	320.011933	C15H10Cl2N2O2	C1=CC=C2C(=C1)C(=NN2CC3=C(C=C(C=C3)Cl)Cl)C(=O)O	39562	303.00864; 321.01921	68.57; 100.00	158.97628; 275.01373; 277.02938	100.00; 91.42; 69.86	79.05423; 98.99960; 104.04948; 131.06037; 132.96063; 158.97628; 185.98718; 197.98718; 214.04180; 241.05270; 248.00283; 250.01848; 261.04253; 271.02688; 275.01373; 285.04253; 319.00356; 321.01921	20.80; 5.55; 11.06; 13.01; 14.26; 100.00; 11.45; 11.37; 30.88; 27.52; 57.04; 26.09; 5.82; 6.49; 22.82; 7.04; 9.01; 10.08
146	156.04776	155.0404851	C7H9NOS	CC1=C(SC(=N1)C)C(=O)C	520888	138.03720; 156.04776	7.71; 100.00	42.03383; 43.01784; 68.04948; 81.03349; 89.00556; 115.02121; 138.03720; 156.04776	11.07; 18.05; 12.63; 7.39; 7.53; 7.69; 22.05; 100.00	39.02293; 42.03383; 43.01784; 45.03349; 52.01818; 54.03383; 56.97935; 63.02293; 68.04948; 70.99500; 73.01065; 74.00590; 80.04948; 81.03349; 89.00556; 97.01065; 98.00590; 104.04948; 112.02155	100.00; 52.90; 94.53; 30.40; 37.05; 20.22; 72.28; 60.56; 57.23; 76.52; 27.53; 26.51; 22.86; 22.28; 21.00; 37.19; 21.23; 27.07; 38.33
147	207.17434	206.1670653	C14H22O	CCC(=O)C=CC1C(=CCCC1(C)C)C	61071	57.03349; 67.05423; 69.06988; 81.06988; 83.04914; 107.08553; 109.10118; 111.11683; 117.06988; 121.10118; 123.11683; 133.10118; 135.08044; 135.11683; 137.13248; 139.14813; 155.17943; 191.14304; 207.17434	6.26; 5.85; 9.18; 6.84; 17.78; 8.68; 9.98; 6.83; 10.75; 7.05; 21.33; 10.27; 7.94; 27.38; 100.00; 26.98; 37.79; 5.50; 45.97	55.05423; 57.03349; 67.05423; 69.06988; 71.08553; 79.05423; 81.06988; 91.05423; 93.06988; 95.08553; 105.06988; 107.08553; 109.10118; 111.11683; 117.06988; 119.08553; 121.10118; 123.11683; 125.13248; 127.14813; 133.10118; 135.08044; 135.11683; 137.13248; 139.14813; 151.14813; 207.17434	22.45; 18.79; 21.35; 78.91; 21.16; 16.31; 27.90; 13.34; 22.41; 21.09; 40.19; 19.24; 19.36; 16.49; 24.23; 22.82; 38.44; 100.00; 25.24; 23.66; 25.04; 11.91; 71.90; 67.05; 25.17; 26.68; 20.19	39.02293; 41.03858; 53.03858; 55.01784; 55.05423; 57.03349; 63.02293; 65.03858; 67.05423; 69.06988; 77.03858; 79.05423; 81.06988; 83.08553; 91.05423; 93.06988; 95.08553; 105.06988; 107.08553; 109.10118; 117.06988; 119.08553; 121.10118; 123.11683; 125.13248; 131.08553; 133.10118; 135.08044; 149.13248	20.85; 30.79; 25.52; 14.80; 51.47; 14.41; 21.89; 77.75; 61.02; 36.55; 29.18; 55.20; 32.85; 19.60; 49.68; 36.15; 16.10; 100.00; 26.89; 14.61; 32.48; 22.35; 29.43; 35.45; 24.46; 33.31; 30.03; 21.05; 21.52
148	278.0134	277.0061193	C14H9Cl2NO	C1C2=CC=CC=C2N(C1=O)C3=C(C=CC=C3Cl)Cl	27211	250.01848; 278.01340	2.75; 100.00	250.01848; 278.01340	28.93; 100.00	104.04948; 192.02107; 214.04180; 248.00283; 250.01848; 278.01340	16.85; 17.12; 78.03; 70.61; 100.00; 25.51
149	130.09749	129.090212	C5H11N3O	C1CN(C(=O)N1)CCN	80480	113.07094; 130.09749	100.00; 13.90	56.04948; 70.06513; 87.05529; 113.07094	5.36; 5.44; 4.61; 100.00	42.03383; 44.01309; 44.04948; 46.02874; 56.04948; 68.04948; 70.02874; 70.06513; 72.04439; 85.03964; 87.05529; 113.07094; 128.08184	26.55; 18.26; 100.00; 15.01; 29.26; 12.89; 30.99; 26.89; 19.09; 13.00; 16.31; 28.90; 33.34
150	130.13387	129.1265975	C6H15N3	C1CN(CCN1)CCN	8795	113.10732; 130.13387	100.00; 86.00	44.04948; 70.06513; 113.10732	5.14; 8.47; 100.00	42.03383; 44.04948; 70.06513; 85.07602; 87.09167; 113.10732	18.89; 100.00; 58.40; 40.15; 21.57; 35.52
151	134.0731	133.0658271	C6H12ClN	C1CCN(C1)CCCl	81669	98.09643; 134.07310	100.00; 70.62	62.99960; 72.08078; 98.09643; 134.07310	19.42; 24.97; 100.00; 67.67	62.99960; 68.04948; 70.06513; 84.08078; 98.09643	100.00; 17.35; 12.91; 68.13; 28.02
152	318.96094	317.953661	C14H10Cl4	C1=CC=C(C(=C1)C(C2=CC=C(C=C2)Cl)C(Cl)Cl)Cl	4211	282.98426; 318.96094	6.21; 100.00	282.98426; 318.96094	61.47; 100.00	113.01525; 170.97628; 204.93731; 206.95296; 235.00758; 247.00758; 280.96861; 282.98426	18.08; 33.51; 100.00; 18.86; 91.01; 57.42; 21.45; 17.31
153	353.14152	352.134241	C21H21ClN2O	CCC(C)N(C)C(=O)C1=CC2=CC=CC=C2C(=N1)C3=CC=CC=C3Cl	1345	297.07892; 353.14152	18.45; 100.00	58.06513; 72.08078; 86.09643; 88.11208; 114.09134; 240.05745; 266.03672; 297.07892; 325.11022; 353.14152	19.42; 12.19; 13.60; 20.93; 7.87; 24.50; 32.20; 22.30; 14.69; 100.00	56.04948; 72.08078; 113.01525; 130.06513; 132.08078; 134.09643; 206.09643; 208.11208; 210.12773; 213.04655; 238.04180; 240.05745; 242.07310; 244.08875; 246.10440; 266.03672	10.13; 5.33; 5.20; 19.39; 13.11; 9.19; 7.56; 9.40; 7.88; 10.90; 13.27; 100.00; 13.86; 36.32; 23.05; 23.94
154	197.084	196.0767261	C10H13ClN2	C1CN(CCN1)C2=CC=CC=C2Cl	415628	180.05745; 197.08400	0.52; 100.00	140.02615; 154.04180	8.90; 7.99	42.03383; 44.04948; 56.04948; 58.06513; 65.03858; 83.06037; 85.07602; 97.07602; 98.99960; 106.06513; 110.99960; 113.01525; 118.06513; 120.08078; 128.02615; 132.08078; 133.07602; 134.09643; 135.09167; 138.01050; 140.02615; 145.05270; 152.02615; 154.04180; 161.10732; 167.03705; 171.06835; 195.06835	25.16; 55.14; 13.36; 24.43; 20.51; 12.88; 16.85; 20.50; 33.45; 12.25; 26.86; 17.16; 64.40; 43.40; 40.53; 19.75; 25.67; 19.61; 16.37; 16.46; 100.00; 12.03; 83.37; 45.24; 26.34; 11.10; 12.18; 42.35
155	157.09715	156.0898776	C7H12N2O2	CCC(=CC)C(=O)NC(=O)N	7214	69.06988; 79.05423; 97.06479; 114.09134; 157.09715	74.83; 20.03; 55.81; 33.19; 100.00	44.01309; 67.05423; 69.06988; 71.08553; 79.05423; 96.08078; 97.06479; 112.07569; 114.09134	10.22; 9.28; 89.44; 9.82; 100.00; 18.74; 71.88; 10.11; 14.60	39.02293; 41.03858; 44.01309; 53.03858; 55.05423; 69.06988; 79.05423	44.15; 95.32; 23.36; 33.09; 62.32; 100.00; 27.65
156	181.09715	180.0898776	C9H12N2O2	C1CN(CCN1)C(=O)C2=CC=CO2	550206	95.01276; 181.09715	14.06; 100.00	44.04948; 77.00219; 87.09167; 95.01276; 113.07094; 138.05495; 152.07060; 164.07060; 181.09715	13.59; 9.19; 14.92; 100.00; 10.48; 29.31; 11.39; 36.39; 70.13	39.02293; 44.04948; 56.04948; 67.01784; 77.00219; 85.07602; 95.01276	67.63; 66.76; 18.43; 60.88; 100.00; 72.36; 50.73
157	147.05529	146.0480128	C8H6N2O	C1=CC=C2C(=C1)C=NNC2=O	8394	91.05423; 147.05529	2.32; 100.00	91.05423; 117.03349; 147.05529	100.00; 60.97; 91.51	65.03858; 89.03858; 91.05423; 104.04948; 117.03349	12.14; 100.00; 55.52; 8.59; 17.06
158	202.12264	201.1153641	C13H15NO	CC(=C)C1=CC(=CC=C1)C(C)(C)N=C=O	604152	157.10118; 174.12773	15.80; 100.00	44.01309; 56.04948; 117.06988; 119.08553; 134.09643; 157.10118; 159.11683; 174.12773; 202.12264	9.74; 11.69; 30.67; 17.51; 26.73; 10.06; 13.00; 100.00; 9.94	89.03858; 91.05423; 93.06988; 103.05423; 117.06988; 119.08553; 143.08553; 157.10118; 159.11683	24.58; 75.40; 61.38; 29.78; 100.00; 37.49; 88.53; 31.07; 46.46
159	324.19581	323.188529	C21H25NO2	CC(=O)OC1(CCN(CC1)CCC2=CC=CC=C2)C3=CC=CC=C3	60977	264.17468; 324.19581	19.90; 100.00	105.06988; 132.08078; 158.09643; 160.11208; 162.12773; 246.14886; 260.14338; 262.15903; 264.17468; 282.18524; 324.19581	8.49; 3.26; 3.67; 9.17; 4.62; 3.88; 2.90; 9.03; 100.00; 5.97; 19.42	77.03858; 79.05423; 91.05423; 105.06988; 107.08553; 115.05423; 129.06988; 131.08553; 133.10118; 134.09643; 141.06988; 145.10118; 148.11208; 156.08078; 158.09643; 160.11208; 170.09643; 184.11208; 238.15903; 262.15903; 264.17468; 282.18524; 294.14886; 296.16451; 298.18016; 322.18016; 324.19581	3.44; 4.62; 8.36; 100.00; 7.92; 3.45; 4.06; 13.44; 7.92; 13.61; 4.33; 3.63; 3.71; 5.43; 6.00; 13.36; 4.30; 6.67; 3.59; 3.35; 5.73; 5.86; 5.69; 3.25; 3.59; 18.25; 3.48
160	213.06341	212.0561327	C10H7F3N2	C1=CC=C(C(=C1)C(F)(F)F)N2C=CN=C2	1359	117.04472; 213.06341	0.22; 100.00	193.05718; 213.06341	4.60; 100.00	116.04948; 164.03063; 166.04628; 184.03686; 186.05251; 193.05718	27.52; 17.70; 100.00; 20.86; 26.55; 80.91
161	197.084	196.0767261	C10H13ClN2	C1CN(CCN1)C2=CC(=CC=C2)Cl	1355	180.05745; 197.08400	2.32; 100.00	154.04180; 197.08400	66.39; 100.00	44.04948; 58.06513; 94.06513; 98.99960; 101.01525; 104.04948; 110.99960; 113.01525; 116.04948; 118.06513; 120.08078; 128.02615; 131.06037; 133.07602; 135.09167; 137.10732; 140.02615; 152.02615; 154.04180; 164.02615; 168.05745; 169.05270; 171.06835; 195.06835	63.16; 14.27; 10.40; 43.82; 18.30; 23.81; 28.22; 42.48; 50.61; 100.00; 28.14; 47.11; 21.28; 21.12; 12.26; 13.36; 40.04; 50.84; 66.13; 10.45; 23.59; 15.21; 15.87; 32.28
162	234.99387	233.986591	C7H7ClN2O3S	C1=CC(=CC=C1S(=O)(=O)NC(=O)N)Cl	89785	174.96150; 191.98805	52.01; 100.00	110.99960; 113.01525	100.00; 36.30	110.99960; 174.96150	100.00; 58.97
163	223.08842	222.0811428	C13H15ClO	CC(C)(C)C(=O)C=CC1=CC=C(C=C1)Cl	306049	205.07785; 223.08842	25.22; 100.00	57.06988; 137.01525; 139.03090; 149.01525; 165.01017; 189.04655; 205.07785; 223.08842	44.78; 37.40; 25.08; 63.25; 26.43; 35.46; 100.00; 48.20	41.03858; 55.05423; 57.06988; 77.00219; 85.06479; 89.03858; 101.03858; 103.05423; 110.99960; 129.03349; 129.06988; 134.99960; 137.01525; 149.01525; 155.08553; 159.08044; 163.11174; 165.01017; 189.04655; 221.07277	12.83; 12.15; 100.00; 9.24; 8.07; 10.03; 25.80; 11.72; 18.95; 12.24; 11.88; 6.44; 47.02; 36.94; 21.68; 8.06; 15.12; 7.15; 36.78; 7.44
164	225.10407	224.0967929	C13H17ClO	CC(C)(C)C(=O)CCC1=CC=C(C=C1)Cl	94617	207.09350; 225.10407	100.00; 66.69	41.03858; 55.05423; 57.06988; 71.08553; 125.01525; 137.01525; 139.03090; 141.04655; 151.03090; 191.06220; 207.09350; 225.10407	8.70; 20.16; 48.41; 11.80; 100.00; 7.49; 53.22; 10.24; 51.52; 28.56; 67.41; 13.91	41.03858; 55.05423; 57.06988; 65.03858; 75.02293; 91.05423; 96.98395; 98.99960; 103.05423; 110.99960; 113.01525; 125.01525; 131.08553; 139.03090; 149.01525; 151.03090; 157.10118; 165.12739; 191.06220	8.17; 15.68; 53.62; 6.15; 13.70; 6.69; 5.54; 20.55; 27.60; 11.63; 16.93; 100.00; 5.86; 52.80; 7.53; 12.53; 11.05; 7.47; 13.27
165	242.1088	241.1015256	C14H12FN3	C1=CC=C2C(=C1)N=C(N2CC3=CC=C(C=C3)F)N	3019305	225.08225; 242.10880	1.88; 100.00	109.04480; 132.05562; 242.10880	42.06; 40.22; 100.00	65.03858; 79.05423; 83.02915; 91.05423; 94.06513; 109.04480; 119.06037; 132.05562; 147.03530; 170.07127; 180.08078; 198.07135; 200.08700; 213.08225; 216.09315; 225.08225; 242.10880; 0.011738	11.00; 40.62; 15.47; 7.67; 10.28; 100.00; 19.14; 13.69; 8.88; 6.88; 10.20; 49.44; 11.84; 12.99; 6.27; 9.09; 6.37; 0.0079896
166	218.09757	217.0902922	C13H12FNO	C1CC(CCC1=O)(C#N)C2=CC=C(C=C2)F	91805	200.08700; 218.09757	12.56; 100.00	94.06513; 122.06004; 146.04005; 148.05570; 172.05570; 173.07610; 174.07135; 176.08700; 189.07102; 191.08667; 198.09134; 200.08700; 218.09757	7.46; 16.24; 11.71; 58.96; 16.77; 9.05; 38.88; 19.20; 12.41; 9.31; 7.36; 55.40; 100.00	43.01784; 64.01818; 66.03383; 81.01350; 104.04948; 114.03383; 116.04948; 121.04480; 128.04948; 133.04480; 134.04005; 135.06045; 140.04948; 142.06513; 145.04480; 146.04005; 147.06045; 148.05570; 149.07610; 158.04005; 160.05570; 162.07135; 174.09134; 176.08700; 189.07102; 201.07102; 216.08192	15.01; 8.82; 7.99; 6.09; 5.80; 18.23; 6.19; 16.68; 9.12; 8.65; 21.79; 9.39; 47.66; 20.35; 24.61; 16.06; 28.82; 5.77; 11.32; 100.00; 31.45; 25.97; 6.11; 11.85; 6.94; 6.34; 25.74
167	191.10666	190.0993797	C12H14O2	CCC(=O)C=CC1=CC=C(C=C1)OC	61008	121.06479; 139.11174; 191.10666	6.12; 10.06; 100.00	53.00219; 55.01784; 57.03349; 65.03858; 77.03858; 79.05423; 83.04914; 91.05423; 93.06988; 107.04914; 109.06479; 119.04914; 121.06479; 123.08044; 131.04914; 133.06479; 135.08044; 147.08044; 161.05971; 173.09609; 191.10666	10.11; 14.97; 32.94; 19.47; 14.74; 18.19; 15.52; 12.20; 11.74; 12.00; 12.26; 7.06; 70.45; 53.97; 12.19; 26.00; 7.38; 11.82; 36.37; 20.15; 100.00	39.02293; 41.03858; 43.01784; 43.05423; 53.03858; 57.03349; 65.03858; 75.02293; 77.03858; 79.05423; 81.06988; 89.03858; 91.05423; 93.06988; 103.05423; 105.03349; 107.04914; 117.03349; 119.04914; 121.06479; 131.04914; 133.06479; 141.06988; 147.08044; 157.06479; 161.05971	14.68; 29.44; 15.04; 24.86; 17.47; 26.93; 51.12; 24.92; 100.00; 33.83; 20.87; 45.34; 24.45; 16.43; 19.25; 13.04; 24.42; 22.32; 18.23; 33.31; 17.25; 37.12; 13.32; 14.41; 25.39; 17.05
168	311.16417	310.1568946	C20H22O3	CC(C)(C)C1=CC=C(C=C1)C(=O)CC(=O)C2=CC=C(C=C2)OC	51040	135.04406; 161.09609	100.00; 92.43	55.05423; 57.06988; 68.99711; 105.03349; 107.04914; 135.04406; 147.04406; 149.05971; 161.09609; 177.05462; 185.09609; 203.10666; 311.16417	15.55; 32.09; 27.42; 17.63; 13.94; 100.00; 7.09; 7.92; 47.02; 13.91; 9.13; 32.98; 15.81	41.03858; 51.02293; 53.03858; 57.06988; 63.02293; 65.00219; 65.03858; 67.01784; 79.01784; 79.05423; 81.06988; 91.01784; 95.08553; 105.03349; 105.06988; 107.04914; 107.08553; 111.11683; 117.06988; 119.08553; 133.10118; 135.04406; 161.09609; 177.12739; 215.07027; 239.07027; 253.12231; 255.13796; 281.11722; 283.13287; 285.14852	16.27; 18.88; 15.31; 19.21; 9.45; 12.87; 9.95; 31.79; 14.55; 26.37; 13.26; 40.64; 20.76; 18.79; 7.73; 99.72; 27.70; 8.14; 11.68; 41.01; 19.26; 100.00; 26.82; 10.06; 28.73; 10.97; 8.69; 10.04; 30.69; 21.91; 34.09
169	195.17434	194.1670653	C13H22O	CCC(=O)C1CC(CC=C1C)C(C)C	35785	43.05423; 81.06988; 93.06988; 95.08553; 97.10118; 109.10118; 111.11683; 135.11683; 137.13248; 177.16378; 195.17434	12.41; 25.06; 21.66; 100.00; 23.23; 13.21; 9.66; 35.12; 87.21; 12.10; 49.98	43.05423; 55.05423; 81.06988; 83.08553; 93.06988; 95.08553; 97.10118; 107.08553; 109.10118; 111.11683; 121.10118; 123.11683; 125.09609; 133.10118; 135.11683; 137.09609; 137.13248; 195.17434	26.20; 33.10; 15.07; 17.06; 44.15; 100.00; 34.35; 34.40; 34.99; 16.15; 24.45; 18.77; 13.85; 12.24; 15.34; 12.43; 48.12; 22.29	41.03858; 43.05423; 55.05423; 65.03858; 67.05423; 69.06988; 71.08553; 73.10118; 79.05423; 81.06988; 83.08553; 85.06479; 91.05423; 93.06988; 95.08553; 107.08553; 109.10118	16.31; 41.54; 83.78; 16.43; 32.13; 54.68; 16.21; 21.55; 22.55; 44.01; 19.42; 32.89; 66.19; 75.29; 37.91; 100.00; 70.33
170	289.15108	288.1438049	C17H18F2N2	C1CN(CCN1)C(C2=CC=C(C=C2)F)C3=CC=C(C=C3)F	152932	203.06668; 289.15108	100.00; 39.52	203.06668; 289.15108	100.00; 9.56	97.04480; 109.04480; 111.06045; 185.07610; 203.06668	4.98; 16.75; 5.60; 3.67; 100.00
171	263.0066	261.99933	C13H11BrO	C1=CC=C(C=C1)OC2=CC=CC(=C2)CBr	94544	184.95965; 263.00660	2.46; 100.00	183.08044; 263.00660	14.86; 100.00	65.03858; 117.03349; 131.04914; 133.06479; 141.03349; 142.94909; 155.04914; 157.06479; 168.96474; 183.08044; 222.97530	33.01; 21.85; 100.00; 96.72; 21.84; 27.92; 34.62; 68.80; 27.24; 84.00; 21.52
172	141.04655	140.039278	C8H9Cl	CC1=CC=CC=C1CCl	11093	105.06988; 141.04655	100.00; 73.95	39.02293; 55.05423; 65.03858; 77.03858; 79.05423; 89.03858; 91.05423; 105.06988; 125.01525; 141.04655	6.24; 4.93; 6.25; 15.68; 20.71; 9.72; 7.54; 100.00; 4.90; 10.73	65.03858; 77.03858; 79.05423; 89.03858; 91.05423; 105.06988	100.00; 41.38; 52.84; 16.68; 76.90; 51.17
173	159.07642	158.0691422	C6H10N2O3	CC1(C(=O)NC(=O)N1CO)C	67000	89.03455; 141.06585; 159.07642	5.89; 38.36; 100.00	41.03858; 43.05423; 44.01309; 46.02874; 68.04948; 70.06513; 84.04439; 86.06004; 87.01890; 88.07569; 112.03930; 117.02947; 129.06585; 141.06585; 159.07642	16.43; 32.78; 13.37; 7.50; 8.29; 19.66; 9.01; 12.74; 9.41; 20.48; 10.40; 7.93; 53.47; 17.20; 100.00	41.03858; 43.05423; 44.01309; 46.02874; 56.01309; 69.99235; 70.06513; 72.00800; 73.03964; 74.02365; 113.03455	100.00; 23.93; 14.99; 13.17; 15.22; 8.62; 20.61; 19.61; 7.35; 7.56; 8.86
174	217.19845	216.1911721	C13H28S	CCCCCCCCCCCCSC	77287	43.05423; 55.05423; 57.06988; 69.06988; 71.08553; 85.10118; 89.04195; 99.11683; 103.05760; 105.07325; 117.07325; 119.08890; 133.10455; 217.19845	7.79; 5.81; 11.79; 4.45; 20.22; 7.36; 5.70; 5.17; 9.30; 8.97; 9.01; 9.25; 6.37; 100.00	41.03858; 43.05423; 55.05423; 57.06988; 59.08553; 61.01065; 69.06988; 71.08553; 75.02630; 83.08553; 85.10118; 89.04195; 91.05760; 97.10118; 217.19845	17.19; 42.66; 35.43; 89.59; 14.56; 46.35; 33.23; 100.00; 13.64; 22.88; 32.08; 37.51; 22.27; 14.54; 16.37	41.03858; 43.05423; 55.05423; 57.06988; 61.01065; 71.08553; 75.02630	31.59; 100.00; 34.53; 68.95; 52.65; 34.94; 24.32
175	192.12437	191.1170954	C9H13N5	CC1=CC=CC=C1N=C(N)N=C(N)N	7155	106.06513; 150.10257; 192.12437	26.06; 23.97; 100.00	106.06513; 108.08078; 131.06037; 148.08692	100.00; 10.99; 23.00; 42.17	43.02907; 45.04472; 65.03858; 77.03858; 79.05423; 91.05423; 104.04948; 106.06513	100.00; 20.20; 29.68; 26.71; 18.62; 70.69; 17.02; 52.64
176	358.08406	357.0767857	C19H16ClNO4	CC1=C(C2=C(N1C(=O)C3=CC=C(C=C3)Cl)C=CC(=C2)OC)CC(=O)O	3715	138.99452; 340.07350; 358.08406	52.49; 49.17; 100.00	138.99452; 312.07858; 358.08406	100.00; 33.78; 20.66	110.99960; 138.99452	4.82; 100.00
177	111.04406	110.0367794	C6H6O2	C1=CC=C(C(=C1)O)O	289	65.03858; 111.04406	52.85; 100.00	65.03858; 83.04914	100.00; 18.22	39.02293; 51.02293; 53.03858; 65.03858	100.00; 31.54; 38.54; 80.66
178	293.24348	292.2362075	C14H32N2O4	CC(CN(CCN(CC(C)O)CC(C)O)CC(C)O)O	7615	160.13321; 293.24348	22.95; 100.00	102.09134; 116.10699; 142.12264; 160.13321; 257.22235; 275.23292; 293.24348	11.04; 20.69; 22.07; 100.00; 15.92; 60.49; 17.96	45.03349; 47.04914; 59.04914; 88.07569; 100.07569; 102.09134; 114.09134; 116.10699; 130.12264; 142.12264; 160.13321; 217.19105	13.64; 17.37; 15.59; 15.79; 52.51; 100.00; 18.23; 57.89; 14.04; 22.56; 61.05; 29.00
179	342.69627	341.689	C2H2Br4	C(C(Br)(Br)Br)Br	61179	262.77011; 342.69627	0.32; 100.00	262.77011; 342.69627	2.78; 100.00	182.84395; 262.77011	47.61; 100.00
180	166.89834	165.891061	C2H2Cl4	C(C(Cl)(Cl)Cl)Cl	12418	130.92166; 166.89834	0.42; 100.00	130.92166; 166.89834	2.88; 100.00	94.94498; 130.92166	56.09; 100.00
181	222.09221	221.0849345	C7H21O2Si3	C[Si](O[Si](C)(C)C)O[Si](C)(C)C	6327366	72.03898; 74.05463; 222.09221	28.19; 41.59; 100.00	57.01550; 59.03115; 72.03898; 73.04680; 74.05463; 133.04994; 150.05268	12.20; 21.95; 44.44; 100.00; 24.08; 9.45; 19.23	57.01550; 59.03115	100.00; 70.12
182	186.90904	185.901768	C2Cl3F3	C(C(Cl)(Cl)Cl)(F)(F)F	9635	166.90282; 186.90904	0.08; 100.00	166.90282; 186.90904	0.93; 100.00	150.93237; 186.90904	43.54; 100.00
183	176.96352	175.956248	C4H7Cl3O	CC(C)(C(Cl)(Cl)Cl)O	5977	158.95296; 176.96352	2.60; 100.00	158.95296; 176.96352	100.00; 88.91	41.03858; 82.94498; 116.90601; 122.97628; 140.98685; 176.96352	42.91; 98.71; 81.30; 26.95; 100.00; 68.13
184	132.93731	131.930033	C2H3Cl3	CC(Cl)(Cl)Cl	6278	96.96063; 132.93731	0.87; 100.00	96.96063; 132.93731	6.12; 100.00	60.98395; 96.96063	18.17; 100.00
185	160.93222	159.924948	C3H3Cl3O	CC(=O)C(Cl)(Cl)Cl	13514	142.92166; 160.93222	10.25; 100.00	43.01784; 160.93222	4.50; 100.00	82.94498; 116.90601; 124.95555; 160.93222	48.65; 75.30; 100.00; 44.15
186	121.08592	120.0786442	C5H12O3	CC(OC)(OC)OC	15050	57.03349; 89.05971	100.00; 63.39	57.03349; 59.04914	34.09; 100.00	57.03349; 59.04914; 75.04406	100.00; 96.29; 98.52
187	623.26394	622.2566682	C38H38O8	C1C(O1)COC2=CC=C(C=C2)C(C3=CC=C(C=C3)OCC4CO4)C(C5=CC=C(C=C5)OCC6CO6)C7=CC=C(C=C7)OCC8CO8	62630	605.25338; 623.26394	48.15; 100.00	255.10157; 281.11722; 295.13287; 311.12779; 417.16965; 443.18530; 473.19587; 567.23773; 587.24282; 591.23773; 593.25338; 595.26903; 605.25338; 623.26394	21.05; 22.55; 13.43; 30.45; 11.31; 13.73; 19.17; 15.25; 13.75; 17.85; 100.00; 31.84; 96.32; 46.87	163.07536; 239.10666; 241.12231; 243.13796; 255.10157; 257.11722; 269.11722; 283.13287; 293.11722; 297.14852; 309.11214; 311.12779; 313.14344; 417.16965; 511.21152; 549.22717; 553.25847; 555.27412; 579.23773; 581.25338; 587.24282; 595.23264; 595.26903; 605.25338; 607.23264; 623.26394	31.17; 28.29; 29.09; 24.16; 61.48; 16.54; 18.95; 13.45; 27.15; 39.57; 25.82; 100.00; 38.71; 14.07; 23.14; 59.91; 22.87; 26.88; 23.40; 13.75; 52.92; 18.42; 15.83; 22.88; 13.19; 16.50
188	342.69627	341.689	C2H2Br4	C(C(Br)Br)(Br)Br	6588	262.77011; 342.69627	0.08; 100.00	262.77011; 342.69627	1.85; 100.00	262.77011; 342.69627	100.00; 97.38
189	166.89834	165.891061	C2H2Cl4	C(C(Cl)Cl)(Cl)Cl	6591	130.92166; 166.89834	0.10; 100.00	130.92166; 166.89834	5.43; 100.00	82.94498; 130.92166	100.00; 79.32
190	186.90904	185.901768	C2Cl3F3	C(C(F)(Cl)Cl)(F)(F)Cl	6428	166.90282; 186.90904	0.08; 100.00	166.90282; 186.90904	0.93; 100.00	150.93237; 186.90904	43.54; 100.00
191	132.93731	131.930033	C2H3Cl3	C(C(Cl)Cl)Cl	6574	96.96063; 132.93731	3.56; 100.00	96.96063; 132.93731	15.86; 100.00	60.98395; 96.96063	100.00; 85.61
192	146.95296	145.945683	C3H5Cl3	CC(C(Cl)Cl)Cl	11733	110.97628; 146.95296	4.69; 100.00	110.97628; 146.95296	31.14; 100.00	62.99960; 110.97628; 146.95296	100.00; 39.74; 36.28
193	210.12773	209.1204495	C15H15N	CC1=NC2=C(C1(C)C)C3=CC=CC=C3C=C2	170530	194.09643; 210.12773	0.43; 100.00	208.11208; 210.12773	13.73; 100.00	41.03858; 42.03383; 92.04948; 108.08078; 115.05423; 117.06988; 144.08078; 151.05423; 158.09643; 160.11208; 166.06513; 167.08553; 168.08078; 178.06513; 182.09643; 184.11208; 192.08078; 194.09643; 208.11208; 210.12773	15.11; 27.58; 14.31; 18.38; 37.92; 26.02; 21.49; 22.39; 21.94; 15.35; 43.38; 25.49; 100.00; 17.67; 21.21; 24.05; 41.18; 36.77; 38.96; 16.29
194	281.08753	280.0802508	C8H24O3Si4	C[Si](C)O[Si](C)(C)O[Si](C)(C)O[Si](C)C	6328651	133.04994; 281.08753	21.67; 100.00	75.02607; 131.03429; 133.04994; 149.04486; 151.06051; 281.08753	37.85; 19.11; 40.81; 40.95; 100.00; 28.07	59.03115; 61.01042	100.00; 38.52
195	285.29004	284.2827638	C17H36N2O	CCCCN(CCCC)C(=O)N(CCCC)CCCC	20691	229.22744; 285.29004	19.36; 100.00	57.06988; 130.15903; 156.13829; 229.22744; 285.29004	34.08; 17.62; 17.17; 23.41; 100.00	55.05423; 57.06988; 98.06004; 100.07569; 102.09134; 112.07569; 114.09134; 130.15903; 156.13829	11.84; 100.00; 8.76; 26.72; 14.68; 7.54; 17.91; 12.46; 15.98
196	160.93222	159.924948	C3H3Cl3O	C(C(=O)C(Cl)Cl)Cl	13530	124.95555; 160.93222	8.51; 100.00	82.94498; 160.93222	19.60; 100.00	76.97887; 82.94498; 106.94498; 124.95555; 142.92166	22.25; 100.00; 29.81; 41.85; 26.85
197	119.06375	118.0564695	C4H10N2S	CNC(=S)N(C)C	2779938	88.02155; 119.06375	61.84; 100.00	44.04948; 88.02155; 119.06375	20.31; 100.00; 26.42	44.04948; 88.02155	76.73; 100.00
198	174.19647	173.1891977	C9H23N3	CN(C)CCN(C)CCN(C)C	18196	129.13862; 174.19647	12.54; 100.00	58.06513; 72.08078; 129.13862	26.36; 100.00; 22.19	58.06513; 72.08078	33.47; 100.00
199	157.15869	156.1514153	C10H20O	CC(CCCC(C)(C)O)C=C	29096	43.05423; 55.05423; 69.06988; 71.08553; 73.06479; 81.06988; 83.08553; 85.10118; 87.08044; 89.09609; 101.09609; 139.14813	15.60; 41.55; 88.38; 100.00; 13.53; 16.62; 94.20; 16.32; 29.65; 26.70; 26.27; 19.90	41.03858; 43.05423; 55.05423; 67.05423; 69.06988; 71.08553; 81.06988; 83.08553; 97.10118	23.14; 38.31; 99.03; 37.09; 61.30; 37.79; 98.33; 100.00; 31.91	41.03858; 43.05423; 53.03858; 55.05423; 67.05423; 69.06988; 71.08553	50.14; 62.63; 66.63; 100.00; 42.02; 94.18; 19.02
200	231.11683	230.1095504	C18H14	C1=CC=C(C=C1)C2=CC=C(C=C2)C3=CC=CC=C3	7115	203.08553; 231.11683	0.72; 100.00	229.10118; 231.11683	6.99; 100.00	101.03858; 103.05423; 129.06988; 177.06988; 179.08553; 201.06988; 203.08553; 205.10118; 215.08553; 227.08553; 229.10118	30.81; 86.55; 100.00; 71.78; 47.97; 51.87; 97.43; 70.16; 65.68; 28.61; 51.29
201	243.13796	242.1306798	C16H18O2	CC1=CC(=CC=C1)OCCOC2=CC=CC(=C2)C	97354	109.06479; 135.08044; 243.13796	88.99; 49.49; 100.00	91.05423; 93.06988; 107.04914; 109.06479; 121.06479; 133.06479; 135.08044; 243.13796	45.05; 12.02; 86.60; 99.40; 20.00; 15.94; 100.00; 39.19	67.05423; 79.05423; 81.06988; 91.05423; 93.06988; 107.04914; 109.06479; 119.04914; 121.06479; 135.08044; 227.10666; 243.13796	12.26; 22.29; 27.25; 100.00; 8.41; 18.70; 14.19; 8.95; 11.42; 8.05; 6.52; 5.17
202	311.22169	310.2144094	C18H30O4	CC(=C)C(=O)OCCCCCCCCCCOC(=O)C(=C)C	81196	41.03858; 69.03349; 87.04406; 97.10118; 123.11683; 135.11683; 137.13248; 139.14813; 153.12739; 155.14304; 205.15869; 221.15361; 223.16926; 225.18491; 243.19547; 269.17474; 293.21112; 311.22169	39.11; 75.57; 27.29; 12.05; 20.00; 9.96; 48.08; 17.93; 12.07; 10.87; 11.04; 15.59; 41.69; 68.69; 21.69; 13.45; 72.15; 100.00	41.03858; 69.03349; 71.04914; 87.04406; 95.08553; 97.10118; 99.04406; 101.05971; 107.08553; 109.10118; 111.11683; 121.10118; 123.11683; 129.09101; 135.11683; 137.13248; 139.14813; 153.12739; 205.15869; 207.17434; 223.16926; 225.18491; 243.19547; 275.20056; 293.21112; 311.22169	69.29; 100.00; 11.95; 88.74; 20.68; 23.82; 19.11; 12.81; 10.66; 21.54; 18.04; 16.02; 52.09; 12.58; 11.28; 40.55; 18.83; 20.26; 16.01; 36.52; 22.92; 46.88; 11.20; 11.90; 39.96; 14.97	41.03858; 55.05423; 67.05423; 69.03349; 69.06988; 71.04914; 87.04406; 95.08553; 97.10118; 99.04406; 101.05971; 107.08553; 109.10118; 121.10118; 123.08044; 123.11683; 125.05971; 125.09609; 135.11683; 137.09609; 137.13248; 139.11174; 141.09101; 153.12739; 169.12231; 193.12231; 195.13796; 221.15361; 237.14852; 269.17474	100.00; 22.17; 14.68; 41.96; 10.67; 15.24; 59.46; 11.40; 11.71; 12.90; 16.17; 11.57; 13.32; 30.81; 10.42; 34.89; 13.37; 14.76; 13.08; 8.52; 16.57; 16.79; 8.46; 48.15; 13.76; 9.56; 9.38; 18.00; 23.11; 11.36
203	181.07602	180.0687483	C12H8N2	C1=CC2=C(C3=C(C=CC=N3)C=C2)N=C1	1318	155.06037; 181.07602	0.10; 100.00	154.06513; 181.07602	0.89; 100.00	152.04948; 154.06513; 179.06037; 181.07602	33.23; 67.73; 41.19; 100.00
204	181.15869	180.1514153	C12H20O	C1CCC(CC1)C2CCCCC2=O	7016	55.05423; 83.08553; 85.10118; 163.14813; 181.15869	8.99; 75.50; 24.97; 71.99; 100.00	41.03858; 43.05423; 55.05423; 57.06988; 79.05423; 81.06988; 83.08553; 85.10118; 93.06988; 121.10118; 123.11683; 125.09609; 163.14813; 181.15869	16.16; 24.49; 99.27; 14.20; 21.51; 34.28; 100.00; 66.88; 14.27; 18.97; 41.92; 17.01; 47.81; 83.97	41.03858; 43.05423; 55.05423; 79.05423; 81.06988; 83.08553; 91.05423; 93.06988; 95.08553; 97.10118; 107.08553; 123.08044	21.48; 7.75; 85.52; 40.19; 100.00; 54.78; 10.94; 23.17; 24.74; 9.43; 15.48; 9.86
205	167.17943	166.1721507	C12H22	C1CCC(CC1)C2CCCCC2	7094	83.08553; 167.17943	82.56; 100.00	83.08553; 85.10118; 109.10118; 125.13248; 167.17943	100.00; 29.99; 16.75; 29.83; 69.15	81.06988; 83.08553; 95.08553; 97.10118; 123.11683; 125.13248	16.30; 100.00; 18.95; 14.38; 15.10; 15.44
206	239.17943	238.1721507	C18H22	CC1=C(C=C(C=C1)C(C)C2=CC(=C(C=C2)C)C)C	74448	133.10118; 239.17943	20.46; 100.00	105.06988; 115.05423; 119.08553; 131.08553; 133.10118; 157.10118; 199.14813; 223.14813; 237.16378; 239.17943	8.35; 13.59; 7.62; 15.85; 27.09; 7.97; 7.41; 7.89; 100.00; 42.41	77.03858; 79.05423; 91.05423; 93.06988; 103.05423; 105.06988; 107.08553; 109.10118; 111.11683; 115.05423; 117.06988; 119.08553; 127.05423; 131.08553; 133.10118; 181.10118; 185.13248; 209.13248; 223.14813; 237.16378	26.71; 35.87; 100.00; 25.10; 59.85; 99.31; 35.33; 24.67; 36.55; 43.91; 48.53; 23.56; 54.21; 20.52; 84.51; 23.21; 33.36; 28.96; 50.06; 75.77
207	245.17607	244.1687967	C14H20N4	C1CCC(CC1)(C#N)N=NC2(CCCCC2)C#N	74978	108.08078; 121.07602; 142.13387; 245.17607	18.32; 59.55; 17.34; 100.00	96.08078; 98.09643; 104.04948; 106.06513; 108.08078; 111.09167; 114.12773; 121.07602; 123.09167; 125.10732; 142.13387; 218.16517; 245.17607	42.57; 16.17; 22.74; 36.54; 82.44; 23.84; 13.36; 96.55; 79.46; 36.18; 18.03; 13.40; 100.00	55.05423; 81.04472; 81.06988; 93.04472; 95.06037; 96.08078; 106.06513; 108.08078; 111.09167; 121.07602; 123.09167; 136.08692; 175.09782; 217.14477	73.09; 24.81; 14.43; 35.21; 35.79; 18.98; 54.90; 100.00; 17.85; 51.74; 54.44; 20.51; 27.63; 35.99
208	98.97628	97.9690055	C2H4Cl2	CC(Cl)Cl	6365	62.99960; 98.97628	22.07; 100.00	62.99960; 98.97628	100.00; 21.37	60.98395; 62.99960	4.45; 100.00
209	96.96063	95.9533555	C2H2Cl2	C=C(Cl)Cl	6366	60.98395; 96.96063	0.98; 100.00	60.98395; 96.96063	47.07; 100.00	60.98395; 96.96063	100.00; 81.69
210	126.9712	125.9639201	C3H4Cl2O	CC(=O)C(Cl)Cl	10567	90.99452; 126.97120	12.54; 100.00	82.94498; 126.97120	76.50; 100.00	43.01784; 82.94498	45.07; 100.00
211	110.97628	109.9690055	C3H4Cl2	CC=C(Cl)Cl	11245	74.99960; 110.97628	59.48; 100.00	74.99960; 110.97628	23.02; 100.00	39.02293; 74.99960	66.81; 100.00
212	165.11213	164.104859	C7H16O4	COCCOCC(OC)OC	56738	57.03349; 59.04914; 75.04406; 101.05971; 103.07536; 107.07027; 133.08592	33.29; 78.49; 58.80; 100.00; 74.38; 29.34; 65.64	45.03349; 57.03349; 59.04914; 75.04406; 77.05971; 89.05971	18.44; 21.74; 100.00; 37.38; 19.73; 63.02	45.03349; 57.03349; 59.04914; 75.04406	27.98; 100.00; 70.72; 29.08
213	199.16926	198.1619799	C12H22O2	CC(=CCCC(=CC(OC)OC)C)C	24191	41.03858; 55.05423; 57.03349; 67.05423; 69.06988; 71.08553; 81.06988; 83.08553; 93.06988; 99.08044; 109.10118; 111.08044; 111.11683; 123.11683; 125.13248; 129.09101; 143.10666; 167.14304; 199.16926	13.78; 56.02; 15.87; 20.53; 100.00; 15.32; 93.78; 31.54; 53.44; 15.27; 87.16; 33.81; 79.12; 16.02; 18.51; 16.14; 21.79; 23.21; 66.44	41.03858; 55.05423; 57.03349; 57.06988; 67.05423; 69.06988; 71.08553; 79.05423; 81.06988; 83.04914; 83.08553; 85.06479; 93.06988; 97.06479; 97.10118; 99.08044; 107.08553; 109.10118; 111.08044; 111.11683; 125.09609	31.16; 55.10; 22.03; 17.30; 27.90; 92.27; 22.95; 31.55; 100.00; 37.93; 87.19; 42.29; 80.09; 13.59; 13.23; 33.34; 14.19; 34.70; 19.68; 27.43; 15.60	39.02293; 41.03858; 43.05423; 55.05423; 57.03349; 65.03858; 67.05423; 69.06988; 79.05423; 81.06988; 83.04914; 83.08553; 85.06479; 93.06988; 95.08553; 97.06479; 99.08044; 107.08553; 109.06479; 109.10118; 111.08044	19.71; 100.00; 37.00; 79.04; 25.03; 19.73; 74.20; 74.70; 27.49; 47.84; 24.72; 25.52; 26.54; 61.26; 26.18; 25.44; 29.79; 57.29; 28.44; 31.42; 33.94
214	91.07536	90.06807956	C4H10O2	CC(OC)OC	10795	27.02293; 59.04914	13.81; 100.00	29.03858; 59.04914	10.41; 100.00	43.01784; 59.04914	25.99; 100.00
215	61.07602	60.06874826	C2H8N2	CN(C)N	5976	44.04948; 61.07602	2.50; 100.00	44.04948; 61.07602	69.91; 100.00	44.04948; 61.07602	75.78; 100.00
216	151.11174	150.1044651	C10H14O	CC(C)(CC1=CC=CC=C1)O	7531	91.05423; 133.10118	43.56; 100.00	91.05423; 133.10118	100.00; 7.85	65.03858; 91.05423; 117.06988	11.40; 100.00; 6.83
217	289.1039	288.0966202	C12H20N2O2S2	C1CCC(=O)N(CC1)SSN2CCCCCC2=O	90282	114.09134; 144.04776; 176.01983; 289.10390	34.63; 42.25; 100.00; 74.70	55.05423; 69.06988; 97.06479; 112.07569; 116.05285; 142.03211; 144.04776; 176.01983; 178.03548; 289.10390	5.57; 15.13; 6.01; 6.45; 15.28; 10.26; 100.00; 50.68; 5.83; 7.47	55.05423; 64.95142; 66.96707; 69.03349; 69.06988; 70.06513; 71.04914; 79.05423; 79.96232; 81.06988; 93.97797; 95.04914; 96.08078; 97.06479; 98.09643; 105.94158; 110.06004; 112.07569; 116.05285; 142.03211; 144.04776; 146.06341; 174.00418; 176.01983	67.53; 19.75; 16.46; 9.16; 100.00; 11.01; 17.97; 57.95; 43.08; 20.81; 18.59; 36.86; 54.27; 13.95; 35.66; 8.74; 13.82; 85.73; 17.88; 9.54; 44.75; 8.14; 16.88; 12.14
218	147.06518	146.0579088	C6H10O4	CC(OC(=O)C)OC(=O)C	222536	41.00219; 43.01784; 45.03349; 87.04406	8.50; 100.00; 18.91; 20.43	43.01784; 45.03349; 61.02841	100.00; 85.80; 74.60	43.01784; 61.02841	100.00; 43.73
219	263.1754	262.1681279	C15H22N2O2	C1CC(CCC1CC2CCC(CC2)N=C=O)N=C=O	21202	177.16378; 188.14338; 216.13829; 220.16959; 235.18049; 263.17540	24.25; 16.13; 56.88; 87.46; 100.00; 71.66	44.01309; 81.06988; 93.06988; 95.08553; 97.10118; 110.09643; 175.14813; 176.10699; 177.16378; 180.13829; 188.14338; 190.12264; 192.13829; 192.17468; 207.18558; 217.16993; 218.15394; 220.16959; 235.18049; 245.16484; 261.15975; 263.17540	5.61; 8.47; 6.91; 11.47; 9.71; 15.82; 6.87; 9.65; 7.47; 5.67; 5.00; 7.92; 10.22; 16.09; 11.26; 19.33; 10.36; 22.95; 100.00; 9.85; 5.83; 21.12	44.01309; 79.05423; 81.06988; 83.08553; 91.05423; 93.06988; 95.08553; 97.10118; 119.08553; 120.04439; 122.06004; 122.09643; 132.04439; 133.10118; 147.11683; 148.07569; 160.11208; 173.13248; 174.09134; 176.10699; 180.13829; 182.15394; 192.13829; 194.15394; 200.14338; 207.14919; 216.13829; 218.15394; 220.16959; 245.16484; 261.15975	94.06; 25.66; 29.15; 80.86; 44.62; 81.84; 100.00; 54.88; 51.22; 84.29; 75.92; 32.09; 40.85; 86.94; 64.51; 26.82; 86.35; 27.37; 37.10; 90.77; 47.38; 23.25; 70.59; 30.62; 48.50; 36.43; 39.88; 21.55; 36.17; 36.08; 56.74
220	794.36454	793.35727	C12H2Br8O	C1=C(C(=C(C(=C1Br)Br)Br)Br)OC2=CC(=C(C(=C2Br)Br)Br)Br	6537506	610.51221; 794.36454	0.04; 100.00	612.52786; 794.36454	0.04; 100.00	690.43838; 794.36454	20.74; 100.00
221	135.10157	134.0942943	C6H14O3	CC(COCC(C)O)O	8087	41.03858; 59.04914; 77.05971; 99.08044; 117.09101	46.24; 100.00; 67.61; 82.32; 78.08	41.03858; 43.05423; 45.03349; 59.04914; 71.04914; 117.09101	31.47; 50.26; 21.36; 100.00; 25.21; 13.77	41.03858; 43.05423; 45.03349; 59.04914	82.75; 64.53; 84.60; 100.00
222	172.16959	171.1623143	C10H21NO	CC1(CC(CC(N1C)(C)C)O)C	75472	154.15903; 172.16959	15.19; 100.00	72.08078; 83.08553; 86.09643; 114.12773; 128.14338; 138.12773; 152.14338; 154.15903; 172.16959	23.33; 6.88; 13.63; 4.84; 5.63; 13.90; 11.06; 100.00; 39.18	29.03858; 39.02293; 41.03858; 43.05423; 45.03349; 55.05423; 56.04948; 57.03349; 57.06988; 70.06513; 72.08078; 81.06988; 83.08553; 85.06479; 86.09643; 99.08044; 110.09643; 138.12773; 154.15903	13.83; 50.84; 34.69; 29.50; 14.06; 97.31; 20.18; 21.77; 27.60; 52.07; 100.00; 77.10; 55.60; 27.64; 20.21; 29.96; 27.26; 13.83; 15.99
223	288.86734	287.860066	C6H6Cl6	C1(C(C(C(C(C1Cl)Cl)Cl)Cl)Cl)Cl	727	286.85169; 288.86734	0.02; 100.00	194.92964; 288.86734	5.07; 100.00	96.96063; 252.89067; 288.86734	17.16; 16.73; 100.00
224	235.04484	234.0375673	C8H10O8	C(C(C(CC(=O)O)C(=O)O)C(=O)O)C(=O)O	15560	171.02880; 173.04445; 199.02371; 217.03428	18.64; 21.35; 59.66; 100.00	99.00767; 101.02332; 119.03389; 129.01824; 131.03389; 143.03389; 145.04954; 171.02880; 173.04445; 189.03936; 191.05501; 217.03428; 235.04484	16.45; 27.76; 20.18; 54.05; 31.61; 94.35; 76.77; 60.06; 100.00; 58.32; 34.92; 62.90; 41.91	47.01276; 71.01276; 73.02841; 115.00258; 117.01824; 119.03389; 127.00258; 129.01824; 131.03389; 141.01824; 143.03389; 145.04954	27.68; 52.21; 100.00; 22.70; 21.62; 17.76; 40.08; 35.83; 32.30; 29.17; 24.97; 40.86
225	214.89834	213.891061	C6H2Cl4	C1=CC(=C(C(=C1Cl)Cl)Cl)Cl	12463	154.92166; 214.89834	0.24; 100.00	96.96063; 214.89834	0.12; 100.00	96.96063; 214.89834	2.91; 100.00
226	134.09643	133.0891494	C9H11N	C1CNCC2=CC=CC=C21	7046	91.05423; 134.09643	8.02; 100.00	89.03858; 91.05423; 117.06988; 132.08078; 134.09643	17.27; 100.00; 41.05; 46.93; 58.84	65.03858; 77.03858; 79.05423; 89.03858; 91.05423; 103.05423; 108.08078; 117.06988; 132.08078	24.94; 23.90; 10.89; 20.68; 100.00; 28.96; 8.45; 8.80; 32.68
227	149.09609	148.088815	C10H12O	C1CC(C2=CC=CC=C2C1)O	10723	131.08553; 149.09609	100.00; 62.55	79.05423; 91.05423; 103.05423; 105.06988; 131.08553	10.28; 99.76; 15.53; 29.10; 100.00	65.03858; 77.03858; 79.05423; 91.05423; 103.05423; 105.06988; 115.05423	12.02; 10.69; 11.69; 100.00; 15.92; 12.30; 17.24
228	147.08044	146.0731649	C10H10O	C1CC2=CC=CC=C2C(=O)C1	10724	129.06988; 147.08044	5.90; 100.00	91.05423; 103.05423; 105.06988; 119.04914; 119.08553; 121.06479; 129.06988; 147.08044	25.82; 13.33; 15.05; 11.89; 18.37; 9.87; 26.79; 100.00	41.00219; 43.01784; 65.03858; 77.03858; 79.05423; 89.03858; 91.05423; 93.06988; 103.05423; 115.05423; 117.06988	6.16; 6.88; 24.27; 14.91; 9.77; 8.91; 100.00; 6.45; 12.47; 9.02; 16.49
229	319.10236	318.0950822	C13H18O9	CC(=O)OCC1C(C(C(O1)OC(=O)C)OC(=O)C)OC(=O)C	227274	185.04445; 187.06010; 199.06010; 259.08123; 277.09179; 301.09179; 319.10236	22.20; 17.86; 45.62; 100.00; 24.23; 25.33; 81.77	43.01784; 85.02841; 87.04406; 103.03897; 157.04954; 185.04445; 187.06010; 197.04445; 199.06010; 215.05501; 217.07066; 235.08123; 245.06558; 247.08123; 257.06558; 259.08123; 275.07614; 277.09179; 301.09179; 319.10236	47.00; 15.91; 13.91; 13.83; 13.39; 21.70; 16.91; 27.81; 40.96; 37.22; 29.50; 11.25; 17.45; 16.11; 11.81; 77.46; 11.44; 89.10; 56.12; 100.00	43.01784; 45.03349; 61.02841; 73.02841; 85.02841; 87.04406; 97.02841; 99.04406; 101.02332; 103.03897; 115.03897; 143.03389; 145.04954; 147.06519; 157.04954; 173.04445; 175.06010; 185.04445; 187.06010; 197.04445; 199.06010; 203.05501; 215.05501; 217.07066; 231.04993; 247.08123; 259.08123; 273.06049; 275.07614; 0.015631; 301.09179; 303.07106	100.00; 52.15; 45.62; 15.88; 69.00; 39.00; 17.61; 19.61; 19.37; 23.58; 13.33; 17.50; 45.34; 30.46; 19.89; 19.14; 14.39; 18.79; 19.64; 35.87; 20.04; 25.53; 25.28; 37.39; 12.69; 31.17; 27.11; 14.69; 25.62; 0.015243; 12.87; 13.18
230	214.89834	213.891061	C6H2Cl4	C1=C(C=C(C(=C1Cl)Cl)Cl)Cl	12468	214.89834	100	214.89834	100	214.89834	100
231	135.11683	134.1095504	C10H14	CC1=CC(=C(C(=C1)C)C)C	10695	79.05423; 107.08553; 109.10118; 119.08553; 135.11683	7.31; 6.55; 4.62; 5.96; 100.00	39.02293; 65.03858; 67.05423; 77.03858; 79.05423; 81.06988; 89.03858; 91.05423; 93.06988; 105.06988; 107.08553; 119.08553; 135.11683	19.57; 42.28; 37.30; 23.60; 51.55; 18.39; 100.00; 25.87; 30.13; 31.11; 30.55; 17.10; 25.59	63.02293; 65.03858; 67.05423; 75.02293; 77.03858; 79.05423; 89.03858; 91.05423; 93.06988; 119.08553	40.14; 71.59; 61.63; 39.14; 100.00; 88.01; 57.82; 21.70; 22.75; 69.15
232	152.0706	151.0633285	C8H9NO2	C1C=CCC2C1C(=O)NC2=O	6808	134.06004; 152.07060	1.84; 100.00	55.05423; 79.05423; 81.06988; 110.02365; 112.03930; 134.06004; 152.07060	7.42; 18.77; 17.68; 6.81; 5.85; 7.53; 100.00	41.03858; 44.01309; 53.03858; 55.05423; 63.02293; 77.03858; 79.05423; 81.06988; 107.04914; 122.02365; 136.03930	5.86; 16.01; 38.18; 5.99; 12.46; 13.21; 100.00; 12.28; 9.77; 5.73; 8.74
233	148.05054	147.0432618	C7H5N3O	C1=CC=C2C(=C1)C(=O)NN=N2	135408793	120.04439; 148.05054	2.24; 100.00	120.04439; 148.05054	42.80; 100.00	51.02293; 53.03858; 63.02293; 65.03858; 105.04472; 120.05562	30.30; 13.50; 100.00; 85.45; 42.54; 21.37
234	120.05562	119.0483472	C6H5N3	C1=CC2=NNN=C2C=C1	7220	92.02432; 120.05562	0.05; 100.00	118.03997; 120.05562	0.77; 100.00	51.02293; 70.03997; 118.03997; 120.05562	42.21; 16.25; 18.61; 100.00
235	180.93731	179.930033	C6H3Cl3	C1=CC(=C(C(=C1)Cl)Cl)Cl	6895	96.96063; 180.93731	1.23; 100.00	96.96063; 180.93731	8.82; 100.00	96.96063; 180.93731	14.68; 100.00
236	146.95296	145.945683	C3H5Cl3	C(C(CCl)Cl)Cl	7285	110.97628; 146.95296	1.90; 100.00	110.97628; 146.95296	5.52; 100.00	60.98395; 110.97628	100.00; 57.85
237	214.89834	213.891061	C6H2Cl4	C1=C(C(=CC(=C1Cl)Cl)Cl)Cl	7270	152.90601; 214.89834	0.07; 100.00	154.92166; 214.89834	0.25; 100.00	154.92166; 214.89834	4.66; 100.00
238	135.11683	134.1095504	C10H14	CC1=CC(=C(C=C1C)C)C	7269	119.08553; 133.10118; 135.11683	48.30; 11.17; 100.00	65.03858; 67.05423; 89.03858; 91.05423; 93.06988; 105.06988; 119.08553; 133.10118; 135.11683	17.70; 20.22; 27.34; 21.05; 52.71; 19.80; 39.35; 100.00; 82.42	65.03858; 67.05423; 75.02293; 77.03858; 79.05423; 89.03858; 93.06988; 103.05423; 117.06988; 133.10118	76.11; 66.94; 38.56; 94.68; 46.96; 82.72; 62.58; 37.78; 36.93; 100.00
239	211.02371	210.0164379	C9H6O6	C1=CC(=C(C=C1C(=O)O)C(=O)O)C(=O)O	10708	193.01315; 211.02371	100.00; 28.19	193.01315; 211.02371	100.00; 35.84	39.02293; 83.01276; 95.01276; 97.02841; 107.01276; 123.04406; 139.00258; 141.01824; 149.02332; 167.03389; 193.01315	16.63; 28.22; 100.00; 30.30; 17.85; 45.89; 15.56; 29.92; 38.58; 18.95; 22.34
240	312.78576	311.77849	C6H3Br3	C1=CC(=C(C=C1Br)Br)Br	12002	206.84395; 312.78576	3.59; 100.00	104.93344; 312.78576	6.26; 100.00	106.94909; 312.78576	3.57; 100.00
241	180.93731	179.930033	C6H3Cl3	C1=CC(=C(C=C1Cl)Cl)Cl	13	118.94498; 180.93731	3.59; 100.00	60.98395; 180.93731	6.26; 100.00	62.99960; 180.93731	3.57; 100.00
242	169.08592	168.0786442	C9H12O3	COC1=CC(=C(C=C1)OC)OC	67284	137.05971; 169.08592	22.15; 100.00	95.04914; 125.05971; 137.05971; 139.07536; 169.08592	5.12; 11.37; 22.90; 5.34; 100.00	39.02293; 51.02293; 55.01784; 57.03349; 69.03349; 73.02841; 81.03349; 83.04914; 93.03349; 95.04914; 99.04406; 109.02841; 113.05971; 123.04406; 125.05971; 137.05971; 153.05462	17.91; 35.52; 23.56; 82.40; 88.89; 15.02; 100.00; 50.55; 64.04; 38.93; 17.18; 16.02; 15.33; 20.59; 57.10; 37.60; 24.28
243	121.10118	120.0939004	C9H12	CC1=CC(=C(C=C1)C)C	7247	67.05423; 79.05423; 81.06988; 93.06988; 95.08553; 105.06988; 121.10118	13.00; 43.57; 11.09; 17.55; 14.04; 24.57; 100.00	41.03858; 53.03858; 65.03858; 67.05423; 75.02293; 77.03858; 79.05423; 91.05423; 93.06988; 105.06988; 121.10118	28.81; 31.75; 56.01; 46.97; 30.01; 38.59; 99.20; 66.97; 87.18; 87.34; 100.00	53.03858; 63.02293; 65.03858; 67.05423; 75.02293; 77.03858; 79.05423; 81.06988; 105.06988	35.87; 27.00; 40.61; 27.56; 44.41; 79.20; 100.00; 29.66; 28.10
244	636.65815	635.65088	C12H18Br6	C1CC(C(CCC(C(CCC(C1Br)Br)Br)Br)Br)Br	18529	556.73199; 636.65815	2.17; 100.00	556.73199; 636.65815	5.86; 100.00	476.80583; 556.73199	36.27; 100.00
245	135.10157	134.0942943	C6H14O3	C(CCO)CC(CO)O	7823	41.03858; 57.03349; 59.04914; 73.06479; 85.06479; 99.08044; 117.09101; 135.10157	25.01; 16.75; 51.43; 91.94; 19.69; 100.00; 85.63; 30.00	41.03858; 45.03349; 55.05423; 73.06479; 99.08044	27.02; 26.42; 100.00; 30.46; 15.71	41.03858; 43.01784; 45.03349; 55.05423; 57.03349; 59.04914; 99.08044	84.06; 34.69; 100.00; 67.35; 26.81; 37.37; 28.51
246	129.04472	128.0374481	C8H4N2	C1=CC=C(C(=C1)C#N)C#N	7042	88.01818; 129.04472	0.44; 100.00	88.01818; 129.04472	5.49; 100.00	50.00253; 51.02293; 76.01818; 77.01342; 78.03383; 88.01818; 100.01818; 101.01342	23.08; 64.94; 54.15; 42.99; 15.73; 100.00; 14.58; 13.49
247	135.04406	134.0367794	C8H6O2	C1=CC=C(C(=C1)C=O)C=O	4807	105.03349; 107.04914	72.41; 100.00	63.02293; 79.05423; 91.01784; 105.03349; 107.04914; 117.03349; 135.04406	43.81; 24.37; 37.00; 72.02; 49.66; 100.00; 29.18	41.00219; 51.02293; 53.03858; 63.02293; 65.03858; 75.02293; 89.00219; 91.01784; 105.03349; 117.03349	24.01; 68.59; 35.91; 50.80; 58.27; 100.00; 39.76; 27.01; 84.37; 30.42
248	363.25299	362.2457096	C22H34O4	CC(C)CCCCOC(=O)C1=CC=CC=C1C(=O)OCCCCC(C)C	591200	99.11683; 149.02332; 151.03897; 247.13287; 249.14852; 345.24242; 363.25299	3.36; 4.92; 5.02; 39.07; 3.34; 11.09; 100.00	43.05423; 55.05423; 57.06988; 71.08553; 83.08553; 93.06988; 95.08553; 97.10118; 99.11683; 123.04406; 133.02841; 135.04406; 149.02332; 151.03897; 167.03389; 181.04954; 191.07027; 193.04954; 195.06519; 207.06519; 209.08084; 247.13287; 249.14852; 255.19547; 265.14344; 271.19039; 321.20604; 363.25299	8.30; 24.61; 27.42; 7.02; 6.08; 15.35; 6.82; 14.80; 23.77; 6.90; 7.38; 7.03; 67.54; 85.56; 100.00; 8.96; 6.11; 7.71; 8.70; 9.71; 7.24; 46.72; 14.12; 10.77; 36.52; 7.99; 12.48; 20.12	41.03858; 43.05423; 55.05423; 57.06988; 69.06988; 71.08553; 81.06988; 83.08553; 85.10118; 93.06988; 95.08553; 97.10118; 99.11683; 105.03349; 107.04914; 135.04406; 149.02332; 151.03897; 167.03389; 179.10666; 191.07027; 229.12231; 247.13287; 269.17474; 283.19039; 363.25299	10.49; 26.60; 73.75; 100.00; 5.88; 7.97; 15.66; 17.41; 6.38; 25.76; 6.30; 9.07; 23.43; 22.67; 20.36; 12.47; 5.36; 6.41; 5.43; 8.71; 5.19; 6.00; 19.46; 6.05; 9.05; 9.18
249	447.34689	446.3396099	C28H46O4	CC(C)CCCCCCCOC(=O)C1=CC=CC=C1C(=O)OCCCCCCCC(C)C	33599	71.08553; 133.02841; 135.04406; 139.07536; 149.02332; 151.03897; 233.11722; 247.13287; 261.18491; 263.20056; 289.17982; 291.19547; 295.22677; 297.24242; 307.19039; 429.33632; 447.34689	5.27; 19.36; 28.87; 3.73; 9.53; 12.46; 4.92; 4.54; 3.93; 3.86; 100.00; 23.20; 8.92; 3.88; 5.29; 8.77; 77.13	55.05423; 57.06988; 71.08553; 83.08553; 85.10118; 95.08553; 101.13248; 107.08553; 109.10118; 111.11683; 133.02841; 141.16378; 149.02332; 151.03897; 167.03389; 191.07027; 219.10157; 231.10157; 233.11722; 247.13287; 261.18491; 289.17982; 291.15909; 291.19547; 295.22677; 297.24242; 307.19039; 349.23734; 429.33632; 445.33124; 447.34689	28.04; 16.64; 35.26; 8.90; 50.72; 9.01; 8.19; 13.93; 17.61; 19.15; 7.83; 15.18; 18.98; 11.70; 6.63; 7.56; 8.69; 6.45; 8.25; 7.70; 7.89; 65.18; 6.58; 10.42; 9.06; 13.83; 18.24; 11.06; 7.67; 100.00; 35.56	43.05423; 55.05423; 57.06988; 71.08553; 81.06988; 83.08553; 85.10118; 93.06988; 95.08553; 97.10118; 107.08553; 109.10118; 111.11683; 123.11683; 125.13248; 127.14813; 135.04406; 135.11683; 137.05971; 141.16378; 163.03897; 165.05462; 177.05462; 193.12231; 199.16926; 261.18491; 289.17982; 351.25299; 431.31559; 445.33124; 447.34689	11.67; 62.89; 100.00; 45.75; 51.52; 43.60; 47.43; 15.05; 89.51; 53.39; 14.08; 23.14; 32.00; 10.19; 11.94; 7.87; 31.38; 9.51; 12.01; 51.70; 17.15; 8.02; 11.47; 8.86; 13.69; 15.10; 33.16; 8.39; 9.03; 8.87; 8.46
250	489.39384	488.3865601	C31H52O4	CCCCCCCCCCCCOC(=O)C1=CC=CC=C1C(=O)OCC(CCC)C(CC)CCC	23066373	43.05423; 111.11683; 113.13248; 127.14813; 133.02841; 155.17943; 219.10157; 259.13287; 261.14852; 263.16417; 273.14852; 275.16417; 277.17982; 289.21621; 303.19547; 317.21112; 335.22169; 347.22169; 445.33124; 447.34689; 449.36254; 459.34689; 461.36254; 463.37819; 489.39384	40.49; 27.06; 28.69; 16.99; 19.36; 14.36; 24.79; 39.32; 100.00; 65.33; 89.78; 77.36; 43.18; 43.76; 65.29; 44.24; 17.66; 13.48; 34.09; 26.98; 16.14; 48.16; 27.08; 42.25; 97.91	43.05423; 55.05423; 57.06988; 71.08553; 85.10118; 99.11683; 111.11683; 113.13248; 115.14813; 127.14813; 149.02332; 151.03897; 155.17943; 167.03389; 193.08592; 209.08084; 219.10157; 259.13287; 261.14852; 263.16417; 277.14344; 279.15909; 303.19547; 317.21112; 321.20604; 333.20604; 335.22169; 347.22169; 445.33124; 461.36254; 489.39384	100.00; 59.14; 69.52; 69.56; 30.62; 45.61; 22.81; 89.47; 25.78; 47.44; 50.36; 49.34; 24.87; 27.18; 52.27; 50.80; 22.01; 20.94; 40.25; 21.16; 20.59; 36.24; 33.65; 28.30; 59.87; 36.94; 22.72; 29.48; 23.22; 21.99; 31.28	41.03858; 43.05423; 55.05423; 57.06988; 69.06988; 71.08553; 79.05423; 81.06988; 83.08553; 85.10118; 87.11683; 93.06988; 95.08553; 97.10118; 109.10118; 111.11683; 113.13248; 123.11683; 125.13248; 127.14813; 133.02841; 139.14813; 151.14813; 153.16378; 155.17943; 165.09101; 219.10157; 265.21621; 347.22169; 361.23734; 375.25299	17.22; 64.12; 30.53; 53.90; 18.01; 14.86; 21.75; 88.19; 83.57; 39.87; 12.56; 14.09; 60.45; 17.87; 45.63; 75.87; 38.01; 24.44; 45.57; 37.02; 12.64; 13.41; 66.05; 17.09; 100.00; 21.22; 21.99; 16.93; 21.75; 15.83; 13.16
251	152.01646	151.009185	C7H5NOS	C1=CC=C2C(=C1)C(=O)NS2	17520	124.02155; 152.01646	5.46; 100.00	124.02155; 152.01646	58.98; 100.00	51.02293; 53.03858; 63.02293; 105.03349; 124.02155	54.97; 25.16; 80.28; 36.93; 100.00
252	187.02871	186.021435	C6H12Cl2O2	C(COCCCl)OCCCl	8171	62.99960; 81.01017; 107.02582; 187.02871	100.00; 31.08; 21.39; 69.14	45.03349; 62.99960; 81.01017; 107.02582; 125.03638	24.52; 100.00; 7.44; 26.73; 10.04	45.03349; 57.03349; 62.99960; 75.04406; 107.02582	15.24; 5.94; 100.00; 6.91; 10.64
253	247.06097	246.0536928	C14H14S2	C1=CC=C(C=C1)SCCSC2=CC=CC=C2	69317	111.02630; 137.04195; 247.06097	28.23; 100.00; 41.00	79.05423; 111.02630; 137.04195	11.89; 100.00; 46.56	65.03858; 77.03858; 79.05423; 83.08553; 97.01065; 111.02630; 123.02630; 169.01402; 195.02967; 247.06097	17.07; 19.90; 66.22; 11.47; 7.32; 100.00; 46.93; 8.04; 8.25; 10.92
254	115.12297	114.1156985	C6H14N2	C1CCC(C(C1)N)N	4610	98.09643; 115.12297	100.00; 72.90	81.06988; 98.09643	100.00; 56.65	55.05423; 56.04948; 58.06513; 70.06513; 81.06988; 98.09643	28.91; 59.01; 23.81; 17.68; 100.00; 23.90
255	75.09167	74.08439833	C3H10N2	CC(CN)N	6567	58.06513; 75.09167	69.76; 100.00	41.03858; 58.06513	16.53; 100.00	41.03858; 58.06513	85.64; 100.00
256	264.89705	263.88977	C6H6Br2N2	C(CC(CBr)(C#N)Br)C#N	61948	184.97089; 264.89705	35.19; 100.00	40.01818; 54.03383; 56.04948; 157.95999; 184.97089; 209.85485; 210.87525; 211.87050; 223.87050; 237.88615; 262.88140; 264.89705	20.37; 29.88; 18.80; 75.02; 100.00; 17.69; 25.26; 62.33; 28.24; 48.43; 31.07; 83.67	40.01818; 54.03383; 91.02907; 129.92869; 143.94434; 153.92869; 155.94434; 157.95999; 168.93959; 170.95524; 182.84395; 207.83920; 209.85485	21.39; 18.96; 74.76; 11.81; 100.00; 26.08; 9.83; 15.81; 8.53; 14.63; 9.43; 16.25; 17.99
257	424.77452	423.76725	C8H12Br4	C1CC(C(CC1C(CBr)Br)Br)Br	18728	238.90655; 424.77453	3.65; 100.00	226.90655; 238.90655; 344.84836; 422.75888; 424.77453	9.71; 13.96; 4.35; 5.21; 100.00	41.03858; 104.93344; 106.94909; 118.94909; 120.96474; 132.96474; 144.96474; 146.98039; 184.85960; 210.87525; 212.89090; 224.89090; 226.90655; 238.90655; 330.83271; 344.84836	67.26; 38.91; 100.00; 59.84; 46.01; 36.14; 33.72; 32.49; 47.61; 30.95; 32.35; 54.95; 29.23; 34.07; 31.34; 30.64
258	186.87525	185.86798	C2H4Br2	C(CBr)Br	7839	106.94909; 186.87525	87.61; 100.00	106.94909; 186.87525	100.00; 58.67	104.93344; 106.94909	5.08; 100.00
259	262.87501	261.867739	C7H3Cl5	C1=CC(=C(C=C1C(Cl)(Cl)Cl)Cl)Cl	25608	226.89834; 262.87501	1.53; 100.00	226.89834; 262.87501	1.59; 100.00	226.89834; 262.87501	55.29; 100.00
260	214.96367	213.95639	C7H3Cl2F3	C1=CC(=C(C=C1C(F)(F)F)Cl)Cl	9481	194.95744; 214.96367	1.44; 100.00	194.95744; 214.96367	8.97; 100.00	194.95744; 214.96367	68.16; 100.00
261	146.97628	145.9690055	C6H4Cl2	C1=CC=C(C(=C1)Cl)Cl	7239	96.98395; 146.97628	0.65; 100.00	96.98395; 146.97628	9.46; 100.00	84.98395; 96.98395; 108.98395; 120.96063; 144.96063; 146.97628	33.30; 44.48; 35.61; 31.94; 43.86; 100.00
262	127.00758	126.0003056	C4H8Cl2	CCC(CCl)Cl	12017	91.03090; 127.00758	15.13; 100.00	55.05423; 91.03090; 127.00758	21.45; 65.42; 100.00	41.03858; 55.05423; 60.98395; 77.01525; 91.03090	100.00; 63.55; 31.84; 73.85; 49.73
263	98.97628	97.9690055	C2H4Cl2	C(CCl)Cl	11	62.99960; 98.97628	100.00; 9.72	62.99960; 98.97628	100.00; 17.10	60.98395; 62.99960	4.79; 100.00
264	112.99193	111.9846556	C3H6Cl2	CC(CCl)Cl	6564	77.01525; 112.99193	9.80; 100.00	77.01525; 112.99193	24.07; 100.00	62.99960; 77.01525	100.00; 90.03
265	167.10666	166.0993797	C10H14O2	CCOC1=CC=CC=C1OCC	74904	139.07536; 167.10666	84.65; 100.00	45.03349; 65.03858; 79.05423; 95.04914; 109.02841; 111.04406; 111.08044; 121.06479; 123.04406; 123.08044; 139.07536; 165.09101; 167.10666	8.44; 13.99; 8.09; 20.71; 37.78; 25.71; 10.51; 39.08; 7.30; 16.79; 36.82; 33.67; 100.00	39.02293; 41.03858; 45.03349; 51.02293; 53.03858; 55.01784; 55.05423; 63.02293; 65.03858; 67.01784; 67.05423; 69.03349; 79.01784; 79.05423; 81.03349; 83.04914; 95.04914; 97.06479; 109.02841; 123.04406; 137.05971	28.79; 33.80; 19.95; 73.74; 89.29; 16.82; 19.01; 17.06; 100.00; 26.34; 27.36; 41.45; 16.76; 23.56; 58.58; 24.52; 21.74; 17.37; 41.30; 20.83; 20.44
266	202.87949	201.872217	C2Cl4F2	C(C(F)(Cl)Cl)(F)(Cl)Cl	6427	182.87327; 202.87949	0.06; 100.00	182.87327; 202.87949	0.62; 100.00	166.90282; 202.87949	58.31; 100.00
267	89.03455	88.02727738	C2H4N2O2	C(=O)NNC=O	12342	44.01309; 61.03964	56.34; 100.00	43.02907; 61.03964; 89.03455	43.13; 100.00; 27.62	43.02907; 59.02399; 71.02399	100.00; 43.61; 69.15
268	174.12773	173.1204495	C12H15N	CC1=CC(NC2=CC=CC=C12)(C)C	8981	132.08078; 174.12773	1.77; 100.00	132.08078; 158.09643; 172.11208; 174.12773	14.56; 6.34; 11.63; 100.00	39.02293; 55.05423; 65.03858; 79.05423; 89.03858; 91.05423; 92.04948; 94.06513; 101.03858; 105.06988; 116.04948; 117.06988; 118.06513; 132.08078; 134.09643; 141.06988	30.58; 74.52; 100.00; 64.87; 29.68; 60.49; 29.71; 26.16; 22.21; 29.84; 71.29; 31.61; 45.01; 68.20; 29.05; 83.98
269	139.07536	138.0680796	C8H10O2	COC1=CC=CC=C1OC	7043	107.04914; 139.07536	41.44; 100.00	51.02293; 53.03858; 57.03349; 59.04914; 63.02293; 65.03858; 69.03349; 81.03349; 83.04914; 95.04914; 107.04914; 139.07536	14.63; 16.17; 11.45; 17.02; 10.24; 16.10; 9.35; 11.58; 8.22; 12.51; 30.69; 100.00	39.02293; 47.04914; 51.02293; 53.03858; 55.01784; 63.02293; 65.03858; 67.01784; 69.03349; 79.01784; 81.03349; 83.04914	25.48; 9.09; 100.00; 62.00; 20.95; 25.32; 59.54; 10.93; 9.85; 11.25; 19.70; 16.59
270	215.10666	214.0993797	C14H14O2	C1=CC=C(C=C1)OCCOC2=CC=CC=C2	7713	121.06479; 215.10666	100.00; 93.22	67.05423; 79.05423; 95.04914; 121.06479; 215.10666	15.47; 28.50; 77.41; 100.00; 14.80	65.03858; 67.05423; 77.03858; 79.05423; 83.08553; 95.04914; 107.04914; 121.06479; 163.07536; 171.04406; 173.05971	28.49; 26.22; 5.87; 100.00; 6.41; 18.88; 10.09; 7.29; 8.79; 7.80; 7.93
271	211.07536	210.0680796	C14H10O2	C1=CC=C(C=C1)C(=O)C(=O)C2=CC=CC=C2	8651	133.02841; 211.07536	7.30; 100.00	105.03349; 133.02841	100.00; 23.51	77.03858; 105.03349	57.37; 100.00
272	197.09609	196.088815	C14H12O	C1=CC=C(C=C1)CC(=O)C2=CC=CC=C2	9948	105.03349; 197.09609	6.80; 100.00	91.05423; 179.08553; 197.09609	39.10; 30.46; 100.00	51.02293; 65.03858; 77.03858; 91.05423; 179.08553	9.15; 12.85; 33.60; 100.00; 11.72
273	185.10732	184.1000484	C12H12N2	C1=CC=C(C=C1)NNC2=CC=CC=C2	31222	79.05423; 185.10732	2.97; 100.00	79.05423; 185.10732	18.23; 100.00	39.02293; 65.03858; 77.03858; 79.05423; 81.06988; 133.07602	17.41; 84.15; 36.91; 100.00; 25.44; 17.37
274	71.04914	70.04186481	C4H6O	C=CC1CO1	13586	41.03858; 53.03858	17.11; 100.00	41.03858; 53.03858	24.69; 100.00	39.02293; 53.03858	15.38; 100.00
275	73.06479	72.05751487	C4H8O	CCC1CO1	7834	55.05423; 73.06479	100.00; 6.83	39.02293; 55.05423	14.95; 100.00	39.02293; 55.05423	53.55; 100.00
276	157.15869	156.1514153	C10H20O	CCCCCCCCC1CO1	16993	41.03858; 43.05423; 55.05423; 57.06988; 69.06988; 71.04914; 71.08553; 83.08553; 85.06479; 87.08044; 139.14813; 157.15869	30.60; 100.00; 45.19; 88.94; 37.79; 15.97; 47.52; 27.89; 20.26; 24.88; 32.05; 67.56	41.03858; 43.05423; 55.05423; 57.06988; 69.06988	67.76; 100.00; 55.94; 55.09; 32.18	41.03858; 43.01784; 43.05423; 55.05423; 57.06988	100.00; 36.78; 63.64; 24.06; 16.41
277	185.18999	184.1827154	C12H24O	CCCCCCCCCCC1CO1	17858	41.03858; 43.05423; 55.05423; 57.06988; 69.06988; 71.04914; 71.08553; 83.08553; 85.06479; 85.10118; 87.08044; 99.11683; 101.09609; 167.17943; 185.18999	20.77; 32.95; 24.72; 53.71; 23.10; 8.37; 33.15; 12.27; 8.99; 8.08; 19.26; 8.00; 7.93; 26.45; 100.00	41.03858; 43.05423; 55.05423; 57.06988; 69.06988; 71.08553; 185.18999	78.37; 54.51; 70.47; 100.00; 38.41; 37.65; 17.11	41.03858; 43.01784; 43.05423; 55.05423; 57.06988	100.00; 20.33; 54.12; 40.77; 26.46
278	241.25259	240.2453156	C16H32O	CCCCCCCCCCCCCCC1CO1	23741	41.03858; 43.05423; 55.05423; 57.06988; 69.06988; 71.08553; 83.08553; 97.10118; 101.09609; 115.11174; 209.22638; 223.24203; 241.25259	3.36; 8.12; 4.68; 10.75; 4.13; 8.31; 2.97; 2.78; 3.12; 3.55; 3.88; 22.52; 100.00	41.03858; 43.01784; 43.05423; 55.05423; 57.06988; 59.08553; 69.06988; 71.08553; 83.08553; 85.10118; 97.10118; 111.11683; 127.14813; 209.22638; 223.24203; 241.25259	43.05; 11.87; 46.53; 41.66; 74.02; 7.34; 30.10; 44.36; 16.94; 8.01; 14.05; 9.12; 8.26; 7.70; 16.32; 100.00	41.03858; 43.01784; 43.05423; 55.05423; 57.06988	100.00; 12.83; 83.97; 45.23; 40.65
279	213.22129	212.2140155	C14H28O	CCCCCCCCCCCCC1CO1	18604	41.03858; 43.05423; 55.05423; 57.06988; 69.06988; 71.08553; 73.06479; 83.08553; 85.10118; 87.08044; 97.10118; 99.11683; 195.21073; 213.22129	4.45; 11.00; 10.60; 17.59; 10.02; 9.82; 4.54; 5.14; 5.05; 6.04; 4.15; 4.63; 22.24; 100.00	41.03858; 43.01784; 43.05423; 55.05423; 57.06988; 69.06988; 71.08553; 83.08553; 85.06479; 85.10118; 195.21073; 213.22129	40.35; 10.91; 53.24; 55.56; 100.00; 56.63; 22.52; 21.82; 12.66; 10.38; 9.07; 46.69	41.03858; 43.05423; 55.05423; 57.06988	100.00; 72.68; 44.20; 38.38
280	147.06518	146.0579088	C6H10O4	CC(=O)OCCOC(=O)C	8121	43.01784; 45.03349; 87.04406; 147.06519	100.00; 24.19; 25.57; 13.86	43.01784; 61.02841; 63.04406; 87.04406	100.00; 40.19; 18.41; 41.06	43.01784; 45.03349	100.00; 66.70
281	147.13796	146.1306798	C8H18O2	CCCCCCC(CO)O	14231	41.03858; 43.05423; 55.05423; 57.06988; 59.04914; 61.06479; 71.08553; 73.06479; 85.10118; 87.08044; 111.11683; 129.12739; 147.13796	28.38; 100.00; 31.43; 70.18; 68.17; 20.76; 90.97; 45.24; 37.42; 88.69; 98.42; 98.58; 27.70	41.03858; 43.05423; 55.05423; 57.06988; 59.04914; 71.08553; 111.11683	64.05; 100.00; 54.43; 96.99; 82.72; 64.61; 30.86	41.03858; 43.01784; 43.05423; 45.03349; 55.05423; 57.03349; 57.06988; 59.04914	71.27; 16.98; 100.00; 25.48; 34.18; 24.17; 87.96; 40.43
282	109.07602	108.0687483	C6H8N2	C1=CC=C(C(=C1)N)N	7243	82.06513; 109.07602	5.55; 100.00	65.03858; 82.06513; 109.07602	18.17; 27.23; 100.00	39.02293; 42.03383; 51.02293; 53.03858; 56.04948; 65.03858; 66.03383; 80.04948	72.56; 28.65; 100.00; 38.23; 68.42; 56.97; 33.58; 24.98
283	77.05971	76.05242949	C3H8O2	CC(CO)O	1030	41.03858; 59.04914	64.68; 100.00	41.03858; 59.04914	66.88; 100.00	41.03858; 45.03349	100.00; 46.56
284	343.32067	342.3133952	C21H42O3	CCCCCCCCCCCCCCCCCC(=O)OCC(C)O	14878	41.03858; 43.05423; 55.05423; 57.06988; 59.04914; 69.06988; 71.08553; 77.05971; 85.10118; 97.10118; 127.14813; 129.16378; 211.24203; 225.25768; 229.17982; 249.25768; 267.26824; 285.27881; 307.29954; 325.31011; 343.32067	1.88; 6.06; 2.36; 9.74; 10.86; 1.73; 6.75; 9.45; 3.59; 2.58; 1.91; 1.35; 2.26; 7.52; 1.30; 4.72; 22.78; 9.43; 1.69; 11.59; 100.00	41.03858; 43.05423; 45.03349; 55.05423; 57.06988; 59.04914; 69.06988; 71.08553; 77.05971; 83.08553; 85.10118; 95.08553; 97.10118; 125.13248; 127.14813; 137.13248; 139.14813; 141.16378; 151.14813; 211.24203; 223.24203; 225.25768; 237.25768; 239.27333; 249.25768; 267.26824; 269.28389; 271.29954; 307.29954; 325.31011; 343.32067	20.07; 34.69; 11.09; 16.67; 65.18; 100.00; 21.30; 49.08; 42.51; 17.17; 19.05; 12.99; 23.41; 11.76; 19.05; 29.19; 26.15; 22.52; 15.10; 13.59; 14.46; 12.83; 12.29; 22.10; 36.55; 98.95; 15.63; 11.18; 12.65; 39.49; 73.40	41.03858; 43.05423; 45.03349; 55.05423; 57.06988; 59.04914; 59.08553; 61.02841; 69.06988; 71.04914; 71.08553; 75.04406; 77.05971; 81.06988; 83.08553; 85.10118; 87.04406; 95.08553; 97.10118; 101.05971; 109.10118; 137.13248; 195.21073	22.82; 77.60; 11.17; 33.17; 100.00; 12.63; 4.69; 5.42; 22.49; 8.49; 32.89; 4.41; 4.72; 8.81; 8.76; 8.87; 3.78; 11.62; 5.27; 4.03; 4.55; 4.14; 3.43
285	264.92205	263.914777	C9H3Cl3O3	C1=C(C=C(C=C1C(=O)Cl)C(=O)Cl)C(=O)Cl	78138	228.94538; 264.92205	3.52; 100.00	228.94538; 264.92205	5.33; 100.00	228.94538; 264.92205	100.00; 4.84
286	211.02371	210.0164379	C9H6O6	C1=C(C=C(C=C1C(=O)O)C(=O)O)C(=O)O	11138	193.01315; 211.02371	49.71; 100.00	193.01315; 211.02371	37.95; 100.00	123.04406; 149.02332; 193.01315	54.22; 100.00; 46.07
287	368.81198	367.8047	C9H7Br3O	C=CCOC1=C(C=C(C=C1Br)Br)Br	76767	328.78068; 368.81198	56.84; 100.00	328.78068; 366.79633; 368.81198	23.71; 21.75; 100.00	39.02293; 41.03858; 69.03349; 93.03349; 130.94909; 158.94400; 160.95965; 184.95965; 196.85960; 206.84395; 208.85960; 208.95965; 210.87525; 262.87017; 264.88582; 288.88582; 298.77011; 314.80141; 328.78068; 340.78068; 352.78068; 366.79633; 368.81198	8.82; 15.64; 10.59; 8.82; 8.89; 10.46; 8.67; 10.47; 24.53; 10.12; 8.33; 19.76; 9.34; 19.12; 27.47; 24.03; 9.66; 10.21; 58.29; 100.00; 19.35; 41.51; 37.66
288	356.81198	355.8047	C8H7Br3O	CC1=C(C(=C(C=C1Br)Br)OC)Br	5067511	224.89090; 356.81198	0.25; 100.00	354.79633; 356.81198	3.55; 100.00	104.93344; 116.93344; 118.94909; 142.94909; 144.96474; 158.94400; 194.84395; 196.85960; 222.87525; 224.89090; 226.87017; 236.85452; 248.89090; 252.88582; 262.87017; 276.88582; 312.78576; 340.78068; 354.79633; 356.81198	28.59; 37.51; 42.89; 44.89; 21.28; 34.22; 21.06; 29.38; 39.58; 20.19; 20.99; 23.28; 21.12; 40.25; 25.58; 77.31; 80.08; 85.52; 100.00; 86.17
289	180.93731	179.930033	C6H3Cl3	C1=C(C=C(C=C1Cl)Cl)Cl	7950	180.93731	100	180.93731	100	180.93731	100
290	172.18082	171.1735477	C9H21N3	CCN1CN(CN(C1)CC)CC	24512	127.12297; 172.18082	0.54; 100.00	144.14952; 172.18082	4.73; 100.00	56.04948; 58.06513; 70.06513; 101.10732; 115.12297	100.00; 33.08; 35.20; 17.59; 40.47
291	205.19508	204.1878008	C15H24	CC(C)C1=CC(=CC(=C1)C(C)C)C(C)C	12860	119.08553; 205.19508	2.32; 100.00	119.08553; 121.10118; 123.11683; 163.14813; 165.16378; 205.19508	70.44; 32.36; 19.54; 44.70; 17.16; 100.00	41.03858; 43.05423; 91.05423; 93.06988; 107.08553; 119.08553; 121.10118; 123.11683; 139.14813; 145.10118; 147.11683; 159.11683; 163.14813; 165.16378; 189.16378	27.98; 83.34; 36.59; 35.09; 49.57; 52.44; 62.40; 37.45; 23.82; 72.86; 100.00; 45.97; 23.27; 33.72; 40.36
292	169.08592	168.0786442	C9H12O3	COC1=CC(=CC(=C1)OC)OC	69301	137.05971; 169.08592	6.91; 100.00	83.04914; 137.05971; 141.09101; 169.08592	7.78; 14.60; 7.79; 100.00	39.02293; 41.03858; 43.01784; 57.03349; 71.04914; 81.03349; 83.04914; 99.04406; 109.06479; 123.04406; 125.05971; 141.09101; 153.05462; 167.07027	45.48; 39.59; 28.96; 43.73; 78.64; 100.00; 71.26; 25.26; 49.72; 80.39; 88.70; 46.76; 82.98; 52.45
293	121.10118	120.0939004	C9H12	CC1=CC(=CC(=C1)C)C	7947	79.05423; 81.06988; 121.10118	22.82; 13.27; 100.00	79.05423; 105.06988; 119.08553; 121.10118	82.30; 64.50; 33.42; 100.00	55.05423; 65.03858; 79.05423; 105.06988	44.68; 100.00; 53.48; 56.58
294	91.03897	90.03169405	C3H6O3	C1OCOCO1	8081	47.01276; 61.02841	100.00; 71.75	45.03349; 91.03897	100.00; 16.20	45.03349; 59.01276; 61.02841	100.00; 77.16; 26.34
295	616.23838	615.2311035	C21H45N3O12Si3	CO[Si](CCCN1C(=O)N(C(=O)N(C1=O)CCC[Si](OC)(OC)OC)CCC[Si](OC)(OC)OC)(OC)OC	117734	552.18595; 584.21217; 616.23838	84.49; 74.88; 100.00	482.19846; 552.18595; 554.20160; 584.21217; 586.22782; 588.24347; 614.22273; 616.23838	11.84; 100.00; 28.74; 27.58; 80.28; 9.71; 12.10; 40.39	105.03663; 121.03155; 137.06285; 332.12724; 334.14289; 346.14289; 372.15854; 374.17419; 409.14570; 413.17700; 441.17191; 462.17224; 464.18789; 468.18281; 480.18281; 494.19846	47.85; 100.00; 19.49; 55.69; 16.91; 30.91; 23.37; 79.64; 31.53; 19.73; 16.61; 17.59; 52.18; 24.75; 18.56; 25.67
296	162.10257	161.0952974	C9H11N3	C(CC#N)CC(CCC#N)C#N	15678	119.06037; 121.07602; 131.06037; 133.07602; 135.09167; 145.07602; 162.10257	8.63; 10.78; 3.39; 9.04; 7.13; 10.43; 100.00	40.01818; 56.04948; 68.04948; 76.01818; 78.03383; 80.04948; 82.06513; 90.03383; 92.04948; 94.06513; 107.06037; 108.08078; 119.06037; 121.07602; 131.06037; 133.07602; 135.09167; 160.08692; 162.10257	14.50; 23.59; 31.60; 14.26; 25.19; 35.58; 29.79; 30.49; 39.15; 100.00; 25.26; 21.21; 82.62; 68.61; 17.62; 23.69; 50.85; 22.43; 26.86	40.01818; 42.03383; 52.01818; 54.03383; 66.03383; 68.04948; 78.03383; 80.04948; 88.01818; 89.01342; 90.03383; 91.02907; 92.04948; 93.04472; 95.06037; 103.02907	22.31; 14.91; 24.30; 15.04; 40.33; 100.00; 23.47; 33.26; 26.64; 22.54; 39.45; 19.05; 25.27; 41.37; 23.22; 21.73
297	109.07602	108.0687483	C6H8N2	C1=CC(=CC(=C1)N)N	7935	82.06513; 109.07602	1.63; 100.00	82.06513; 109.07602	17.20; 100.00	39.02293; 51.02293; 63.02293; 65.03858; 66.03383; 67.02907; 80.04948; 82.06513; 107.06037; 109.07602	18.70; 35.62; 46.45; 41.25; 44.25; 22.99; 100.00; 27.19; 22.29; 34.21
298	129.04472	128.0374481	C8H4N2	C1=CC(=CC(=C1)C#N)C#N	12276	76.01818; 129.04472	0.43; 100.00	76.01818; 129.04472	4.79; 100.00	51.02293; 74.00253; 76.01818; 78.03383	75.90; 14.00; 100.00; 39.06
299	202.96611	201.9588348	C8H4Cl2O2	C1=CC(=CC(=C1)C(=O)Cl)C(=O)Cl	7451	166.98943; 202.96611	28.10; 100.00	166.98943; 202.96611	20.85; 100.00	77.00219; 79.01784; 112.97887; 166.98943; 202.96611	29.94; 56.57; 43.84; 100.00; 23.38
300	167.03388	166.0266087	C8H6O4	C1=CC(=CC(=C1)C(=O)O)C(=O)O	8496	79.05423; 123.04406; 167.03389	83.33; 100.00; 56.60	44.99711; 105.03349; 149.02332; 167.03389	41.08; 57.82; 80.40; 100.00	44.99711; 51.02293; 79.05423; 97.02841; 105.03349; 121.02841; 123.04406	25.43; 57.49; 83.39; 20.89; 100.00; 39.52; 32.95
301	137.10732	136.1000484	C8H12N2	C1=CC(=CC(=C1)CN)CN	15133	120.08078; 137.10732	100.00; 8.49	91.05423; 120.08078	81.40; 100.00	51.02293; 63.02293; 65.03858; 79.05423; 80.04948; 91.05423; 92.04948; 93.06988; 94.06513; 104.04948; 120.08078	15.21; 11.19; 65.02; 12.00; 20.04; 100.00; 11.58; 28.99; 16.28; 21.28; 21.74
302	245.12845	244.1211778	C14H16N2O2	CC(C)(C1=CC(=CC=C1)C(C)(C)N=C=O)N=C=O	17719	174.12773; 217.13354	62.80; 100.00	134.09643; 159.11683; 174.12773; 200.10699; 202.12264; 217.13354	9.27; 12.99; 53.55; 10.16; 11.45; 100.00	117.06988; 119.08553; 134.06004; 157.10118; 159.11683; 174.12773; 186.09134	26.59; 13.68; 7.80; 59.90; 100.00; 29.76; 11.43
303	317.10196	316.0946882	C17H16O6	C1=CC(=CC=C1C(=O)O)OCCCOC2=CC=C(C=C2)C(=O)O	68610	179.07027; 299.09140; 317.10196	11.54; 19.78; 100.00	95.04914; 121.02841; 133.06479; 135.08044; 139.03897; 177.05462; 179.07027; 257.08084; 271.09649; 299.09140; 317.10196	27.21; 17.69; 37.74; 30.01; 91.24; 24.54; 100.00; 12.98; 14.05; 27.13; 97.25	79.05423; 95.04914; 97.02841; 107.04914; 111.04406; 121.02841; 125.05971; 127.07536; 129.09101; 131.04914; 133.06479; 139.03897; 179.07027; 221.08084; 291.08631	35.87; 100.00; 10.84; 13.30; 28.24; 76.56; 12.73; 12.11; 12.95; 71.26; 21.42; 61.40; 12.30; 10.12; 29.12
304	195.1128	194.1055277	C10H14N2O2	C1CC(CC(C1)CN=C=O)CN=C=O	53172	105.06988; 109.10118; 124.11208; 148.07569; 152.10699; 165.10224; 177.10224; 195.11280	15.94; 84.29; 18.39; 68.28; 56.37; 13.99; 51.20; 100.00	93.06988; 95.08553; 97.10118; 107.08553; 109.10118; 122.09643; 124.11208; 134.09643; 149.10732; 152.10699; 159.09167; 167.11789; 177.10224; 193.09715; 195.11280	17.35; 36.11; 16.37; 16.35; 100.00; 13.30; 34.63; 44.83; 10.67; 70.33; 13.03; 19.22; 30.67; 34.96; 14.85	42.03383; 44.04948; 56.01309; 91.05423; 93.06988; 95.08553; 97.10118; 105.06988; 107.08553; 109.10118; 110.06004; 110.09643; 120.08078; 122.06004; 122.09643; 124.07569; 124.11208; 139.12297; 148.07569; 152.10699; 163.08659; 167.11789; 193.09715	47.72; 23.13; 48.55; 33.16; 100.00; 51.73; 13.89; 36.15; 47.70; 23.85; 17.76; 50.23; 38.20; 21.86; 25.75; 15.45; 30.08; 23.22; 15.27; 14.37; 17.21; 38.63; 55.63
305	91.07536	90.06807956	C4H10O2	CC(CCO)O	7896	55.05423; 73.06479	100.00; 27.11	45.03349; 55.05423	56.77; 100.00	45.03349; 55.05423	38.45; 100.00
306	143.15427	142.1469986	C8H18N2	C1CC(CC(C1)CN)CN	17406	97.10118; 126.12773; 143.15428	47.57; 100.00; 50.73	55.05423; 56.04948; 84.08078; 95.08553; 97.10118; 109.10118; 126.12773; 143.15428	9.05; 9.84; 8.49; 19.82; 26.74; 100.00; 94.28; 7.61	41.03858; 43.05423; 55.05423; 56.04948; 58.06513; 67.05423; 69.06988; 70.06513; 81.06988; 83.08553; 84.08078; 95.08553; 97.10118; 109.10118; 110.09643; 126.12773	33.36; 23.95; 32.51; 100.00; 17.93; 46.26; 31.77; 37.79; 13.24; 24.03; 32.40; 23.50; 21.85; 25.65; 20.61; 33.28
307	113.05971	112.0524295	C6H8O2	C1CC(=O)CC(=O)C1	10434	43.01784; 67.05423; 69.03349; 71.04914; 85.06479; 95.04914; 113.05971	31.56; 12.28; 15.56; 11.26; 23.27; 41.57; 100.00	41.00219; 41.03858; 43.01784; 53.03858; 67.05423; 69.03349; 71.04914; 95.04914	62.41; 40.01; 100.00; 55.13; 38.08; 81.86; 22.63; 84.47	39.02293; 41.00219; 41.03858; 43.01784; 53.00219; 53.03858; 55.01784; 67.05423; 95.04914	28.30; 31.36; 85.89; 100.00; 21.84; 31.61; 31.12; 44.17; 18.36
308	67.05423	66.04695019	C5H6	C1C=CC=C1	7612	39.02293; 67.05423	1.05; 100.00	39.02293; 67.05423	24.21; 100.00	39.02293; 51.02293; 65.03858	100.00; 44.59; 82.48
309	284.88688	283.8796	C5H6Br2N2O2	CC1(C(=O)N(C(=O)N1Br)Br)C	6479	163.97055; 284.88688	1.28; 100.00	41.03858; 163.97055; 216.86066; 284.88688	21.00; 16.85; 10.86; 100.00	41.03858; 43.05423; 119.94434; 121.92360; 135.97564; 198.85010; 216.86066	100.00; 26.80; 11.87; 79.00; 25.64; 35.35; 13.71
310	200.8909	199.88363	C3H6Br2	C(CBr)CBr	8001	120.96474; 200.89090	28.41; 100.00	120.96474; 200.89090	100.00; 98.47	106.94909; 120.96474	71.06; 100.00
311	124.99193	123.9846556	C4H6Cl2	CC(=CCCl)Cl	13556	62.99960; 124.99193	11.45; 100.00	62.99960; 65.01525; 124.99193	100.00; 81.85; 80.71	39.02293; 53.03858; 89.01525	26.27; 100.00; 69.83
312	128.98685	127.9795702	C3H6Cl2O	C(C(CCl)O)Cl	7289	93.01017; 128.98685	19.22; 100.00	78.99452; 128.98685	19.75; 100.00	60.98395; 74.99960; 78.99452	100.00; 24.24; 29.42
313	196.98791	195.9806328	C5H6Cl2N2O2	CC1(C(=O)N(C(=O)N1Cl)Cl)C	8360	120.02107; 196.98791	1.28; 100.00	41.03858; 120.02107; 128.96169; 196.98791	21.00; 16.85; 10.86; 100.00	41.03858; 43.05423; 75.99485; 77.97412; 92.02615; 110.95113; 128.96169	100.00; 26.80; 11.87; 79.00; 25.64; 35.35; 13.71
314	146.97628	145.9690055	C6H4Cl2	C1=CC(=CC(=C1)Cl)Cl	10943	62.99960; 146.97628	4.88; 100.00	144.96063; 146.97628	3.76; 100.00	108.98395; 144.96063; 146.97628	13.79; 30.25; 100.00
315	112.99193	111.9846556	C3H6Cl2	C(CCl)CCl	8881	77.01525; 112.99193	75.66; 100.00	77.01525; 112.99193	100.00; 85.03	41.03858; 62.99960	100.00; 93.68
316	126.9712	125.9639201	C3H4Cl2O	C(C(=O)CCl)Cl	10793	108.96063; 126.97120	10.52; 100.00	90.99452; 126.97120	27.36; 100.00	41.00219; 76.97887; 90.99452; 108.96063	71.93; 100.00; 65.92; 45.86
317	110.97628	109.9690055	C3H4Cl2	C(C=CCl)Cl	24883	74.99960; 110.97628	5.22; 100.00	74.99960; 110.97628	100.00; 88.51	39.02293; 74.99960	100.00; 77.83
318	392.17574	391.1684623	C26H21N3O	C1=CC=C(C=C1)N2C3=CC=CC=C3C(C2=O)(CC4=CC=NC=C4)CC5=CC=NC=C5	3932	364.18082; 392.17574	2.00; 100.00	92.04948; 94.06513; 364.18082; 392.17574; 0.10754	17.86; 8.38; 16.15; 100.00; 0.081818	92.04948; 170.09643; 180.08078; 193.07602; 194.09643; 195.09167; 220.07569; 244.11208; 246.12773; 269.10732; 271.12297; 273.13862; 297.10224; 313.13354; 337.16993; 339.14919; 341.16484; 347.11789; 349.13354; 351.14919; 363.14919; 365.16484; 392.17574	72.17; 31.92; 47.91; 100.00; 31.19; 36.68; 39.21; 32.13; 37.42; 42.71; 65.88; 38.06; 55.27; 34.62; 41.39; 53.62; 39.66; 60.46; 59.57; 35.90; 40.27; 36.78; 41.69
319	196.08692	195.0796473	C12H9N3	C1=CC=C2C=C3C(=CC2=C1)C(=NC3=N)N	171660	154.06513; 196.08692	0.15; 100.00	154.06513; 196.08692	6.77; 100.00	154.06513; 179.06037; 196.08692	100.00; 16.79; 63.13
320	163.14813	162.1408506	C12H18	CC(C)C1=CC(=CC=C1)C(C)C	7450	43.05423; 105.06988; 119.08553; 121.10118; 163.14813	28.83; 14.08; 23.10; 42.34; 100.00	43.05423; 79.05423; 81.06988; 93.06988; 105.06988; 119.08553; 121.10118; 123.11683; 163.14813	99.54; 70.29; 32.31; 30.77; 60.51; 92.02; 100.00; 96.67; 42.58	39.02293; 41.03858; 51.02293; 65.03858; 75.02293; 77.03858; 79.05423; 81.06988; 91.05423; 95.08553; 103.05423; 105.06988; 107.08553; 147.11683; 161.13248	26.48; 25.08; 24.00; 36.74; 50.57; 100.00; 90.85; 55.56; 35.69; 27.39; 64.65; 58.28; 23.79; 37.23; 55.13
321	139.07536	138.0680796	C8H10O2	COC1=CC(=CC=C1)OC	9025	107.04914; 139.07536	5.09; 100.00	39.02293; 51.02293; 53.03858; 57.03349; 59.04914; 81.03349; 83.04914; 107.04914; 109.06479; 111.08044; 139.07536	9.75; 15.06; 13.98; 9.67; 11.15; 22.49; 16.55; 30.52; 10.64; 51.50; 100.00	39.02293; 41.03858; 51.02293; 53.03858; 63.02293; 65.03858; 69.03349; 79.05423; 81.03349; 83.04914; 95.04914	31.24; 11.69; 100.00; 34.58; 25.47; 47.74; 11.96; 11.76; 30.04; 13.23; 16.92
322	102.12773	101.1204495	C6H15N	CC(C)CC(C)N	7908	43.05423; 57.06988; 85.10118; 102.12773	63.62; 10.15; 100.00; 24.61	41.03858; 43.05423; 57.06988; 69.06988; 85.10118	27.84; 100.00; 28.38; 29.05; 46.08	41.03858; 43.05423; 57.06988; 58.06513	100.00; 51.08; 50.42; 35.22
323	121.06077	120.0534921	C3H8N2O3	C(NC(=O)NCO)O	8827	44.01309; 46.02874; 48.04439; 73.03964; 74.02365; 91.05020	43.43; 31.92; 75.50; 38.99; 100.00; 27.72	46.02874; 48.04439; 56.01309; 74.02365; 85.03964	38.12; 36.53; 41.43; 100.00; 54.00	30.03383; 46.02874; 56.01309	80.77; 100.00; 58.28
324	240.14952	239.1422476	C15H17N3	CC1=CC=CC=C1NC(=NC2=CC=CC=C2C)N	7333	135.09167; 240.14952	4.57; 100.00	91.05423; 106.06513; 108.08078; 118.06513; 238.13387; 240.14952	12.82; 16.98; 19.65; 13.66; 15.97; 100.00	77.03858; 79.05423; 91.05423; 104.04948; 106.06513; 108.08078; 110.09643; 118.06513; 131.06037; 135.09167; 162.10257; 214.13387; 240.14952	37.30; 33.77; 100.00; 9.60; 39.96; 21.56; 17.21; 16.00; 15.12; 13.94; 13.75; 20.75; 10.70
325	149.08083	148.0735589	C6H12O4	C1C(COCO1)(CO)CO	80373	101.05971; 103.07536; 131.07027; 149.08084	48.80; 34.82; 100.00; 57.73	45.03349; 61.02841; 69.03349; 71.04914; 73.06479; 87.04406; 99.04406; 101.05971; 119.07027; 131.07027; 149.08084	32.76; 37.03; 59.74; 81.49; 44.28; 83.96; 30.16; 100.00; 46.34; 43.01; 34.62	45.03349; 61.02841; 71.04914; 85.02841; 87.04406; 99.04406; 101.05971; 119.07027	100.00; 4.86; 6.85; 5.46; 50.37; 8.59; 14.22; 4.95
326	89.02332	88.01604399	C3H4O3	C1COC(=O)O1	7303	44.99711; 89.02332	62.54; 100.00	43.01784; 45.03349; 89.02332	100.00; 86.18; 69.94	43.01784; 45.03349	81.73; 100.00
327	75.04406	74.03677943	C3H6O2	C1COCO1	12586	43.01784; 45.03349; 57.03349	49.65; 100.00; 33.09	43.01784; 45.03349; 47.01276; 57.03349	27.83; 56.92; 100.00; 27.86	45.03349; 47.01276; 57.03349	91.65; 58.72; 100.00
328	225.09101	224.0837296	C15H12O2	C1=CC=C(C=C1)C(=O)CC(=O)C2=CC=CC=C2	8433	105.03349; 225.09101	100.00; 72.50	105.03349; 225.09101	100.00; 5.86	77.03858; 79.05423; 103.05423; 105.03349	100.00; 21.56; 13.08; 12.12
329	212.11822	211.1109474	C13H13N3	C1=CC=C(C=C1)NC(=NC2=CC=CC=C2)N	7594	195.09167; 212.11822	3.84; 100.00	94.06513; 119.06037; 212.11822	41.24; 17.98; 100.00	51.02293; 65.03858; 67.02907; 67.05423; 92.04948; 94.06513; 119.06037; 136.08692; 158.07127; 160.08692	13.88; 31.51; 15.82; 15.41; 40.78; 100.00; 12.62; 12.61; 17.30; 14.32
330	145.13354	144.1262631	C7H16N2O	CC(C)NC(=O)NC(C)C	20084	60.08078; 103.08659; 145.13354	100.00; 69.16; 74.80	44.04948; 60.08078; 86.06004; 101.07094; 103.08659	14.69; 100.00; 41.67; 16.51; 22.81	43.05423; 44.01309; 44.04948; 58.06513; 60.08078; 86.06004; 87.05529	68.86; 26.85; 27.23; 76.46; 100.00; 34.88; 29.40
331	203.16417	202.1568946	C11H22O3	CCCCCCC(CCOC(=O)C)O	234237	41.03858; 43.01784; 43.05423; 45.03349; 55.05423; 57.06988; 69.06988; 71.04914; 71.08553; 73.06479; 85.10118; 87.08044; 87.11683; 89.05971; 95.08553; 97.10118; 113.09609; 115.07536; 115.11174; 123.11683; 125.13248; 133.08592; 139.11174; 143.14304; 185.15361; 203.16417	21.03; 26.19; 43.18; 24.02; 24.88; 31.15; 21.84; 27.92; 48.14; 47.62; 56.38; 21.14; 14.83; 18.02; 24.04; 22.30; 22.12; 31.04; 45.95; 21.88; 25.16; 36.38; 19.42; 23.29; 59.04; 100.00	41.03858; 43.01784; 43.05423; 45.03349; 55.05423; 57.03349; 57.06988; 59.04914; 61.02841; 69.06988; 71.04914; 71.08553; 73.02841; 73.06479; 75.04406; 83.08553; 85.10118; 87.04406; 89.05971; 95.08553; 97.10118; 99.04406; 143.14304	53.46; 100.00; 53.96; 18.90; 50.71; 20.97; 48.32; 16.22; 16.64; 19.20; 23.77; 65.92; 17.46; 33.96; 21.47; 23.51; 63.83; 21.88; 22.03; 17.80; 21.67; 26.81; 18.95	41.03858; 43.01784; 43.05423; 45.03349; 55.05423; 57.03349; 57.06988; 61.02841; 71.04914; 71.08553	61.63; 88.06; 100.00; 91.01; 46.11; 22.68; 59.72; 26.01; 16.39; 19.96
332	123.01104	122.0037652	C3H6O3S	C1COS(=O)(=O)C1	14264	57.03349; 59.04914; 105.00048; 123.01104	27.26; 27.03; 29.82; 100.00	41.03858; 43.01784; 45.03349; 57.03349; 64.96918; 94.97974; 105.00048; 123.01104	48.56; 23.69; 42.98; 14.54; 100.00; 11.25; 94.25; 43.43	64.96918; 80.96409	85.62; 100.00
333	77.05971	76.05242949	C3H8O2	C(CO)CO	10442	41.03858; 59.04914	59.72; 100.00	41.03858; 59.04914	70.31; 100.00	41.03858; 59.04914	100.00; 14.47
334	315.13393	314.1266571	C17H18N2O4	C1=CC(=CC=C1C(=O)OCCCOC(=O)C2=CC=C(C=C2)N)N	93312	94.06513; 120.04439; 152.07060; 315.13393	12.68; 44.13; 13.47; 100.00	94.06513; 120.04439; 122.06004; 138.05495; 164.07060; 176.07060; 178.08626; 297.12337; 315.13393	32.80; 100.00; 22.31; 25.59; 9.47; 8.80; 38.68; 25.76; 39.64	67.01784; 69.03349; 78.03383; 93.03349; 94.06513; 104.04948; 106.06513; 120.04439; 122.06004; 256.06043; 264.12303; 272.09173	13.89; 11.65; 14.40; 22.72; 100.00; 9.54; 7.10; 74.17; 21.41; 9.31; 8.73; 7.68
335	59.04914	58.04186481	C3H6O	C1COC1	10423	41.03858; 59.04914	100.00; 68.77	41.03858; 59.04914	71.46; 100.00	39.02293; 41.03858	21.85; 100.00
336	177.05462	176.0473441	C10H8O3	C1=CC2=C(C=CC(=C2C(=C1)O)O)O	3083585	159.04406; 177.05462	8.14; 100.00	149.05971; 0.012944); 177.05462	8.77; ; 100.00	39.02293; 51.02293; 53.03858; 55.01784; 65.03858; 79.05423; 93.03349; 95.04914; 105.03349; 109.02841; 119.04914; 121.02841; 123.04406; 131.04914; 145.02841; 147.04406; 149.05971; 159.04406	26.21; 22.79; 22.62; 26.12; 12.89; 29.97; 33.69; 70.47; 32.89; 13.54; 12.36; 100.00; 16.58; 53.33; 13.69; 22.45; 17.15; 12.82
337	109.07602	108.0687483	C6H8N2	C1=CC(=CC=C1N)N	7814	82.06513; 109.07602	0.75; 100.00	65.03858; 82.06513; 109.07602	100.00; 78.17; 62.01	39.02293; 41.03858; 56.04948; 58.06513; 65.03858; 80.04948; 82.06513; 107.06037	20.85; 56.80; 52.48; 20.90; 85.07; 100.00; 45.92; 45.96
338	202.96611	201.9588348	C8H4Cl2O2	C1=CC(=CC=C1C(=O)Cl)C(=O)Cl	7488	166.98943; 202.96611	9.46; 100.00	166.98943; 202.96611	17.65; 100.00	51.02293; 79.01784; 89.00219; 100.97887; 124.97887; 166.98943	19.13; 46.16; 15.40; 21.56; 23.86; 100.00
339	109.02841	108.0211294	C6H4O2	C1=CC(=O)C=CC1=O	4650	81.03349; 109.02841	8.85; 100.00	81.03349; 109.02841	32.01; 100.00	53.00219; 63.02293; 81.03349	37.14; 100.00; 33.03
340	195.13796	194.1306798	C12H18O2	CC(C)(C1=CC=C(C=C1)C(C)(C)O)O	18062	159.11683; 177.12739	95.78; 100.00	117.06988; 119.08553; 137.09609; 159.11683; 177.12739; 195.13796	40.55; 71.91; 28.05; 84.53; 100.00; 71.14	49.00728; 51.02293; 53.03858; 91.05423; 93.06988; 103.05423; 109.06479; 111.08044	41.01; 100.00; 11.51; 30.10; 83.41; 11.40; 12.28; 10.59
341	175.09648	174.0892089	C8H14O4	C(COCC#CCOCCO)O	62411	45.03349; 51.02293; 53.03858; 55.05423; 63.04406; 69.03349; 97.06479; 113.05971; 115.07536	100.00; 26.30; 74.69; 15.31; 39.55; 15.59; 24.17; 68.17; 22.92	39.02293; 45.03349; 53.03858; 55.05423; 63.04406; 69.03349; 81.03349; 83.04914; 113.05971	52.26; 44.62; 100.00; 24.54; 13.12; 32.80; 12.83; 39.57; 15.70	39.02293; 43.01784; 45.03349; 51.02293; 53.03858; 55.01784; 55.05423; 63.04406; 69.03349; 81.03349; 83.04914; 113.05971	14.71; 33.31; 100.00; 48.41; 48.73; 12.84; 17.14; 13.53; 60.97; 18.04; 65.67; 18.94
342	167.10666	166.0993797	C10H14O2	COCC1=CC=C(C=C1)COC	81239	91.05423; 103.05423; 105.06988	87.74; 71.07; 100.00	91.05423; 103.05423; 105.06988; 135.08044; 167.10666	100.00; 21.25; 39.73; 21.56; 19.04	91.05423; 103.05423; 105.06988	14.98; 23.65; 100.00
343	323.1754	322.1681279	C20H22N2O2	CC(C)NC1=C2C(=C(C=C1)NC(C)C)C(=O)C3=CC=CC=C3C2=O	61719	281.12845; 323.17540	4.60; 100.00	281.12845; 323.17540	18.41; 100.00	44.04948; 58.06513; 177.10224; 212.07060; 224.07060; 237.06585; 239.08150; 241.09715; 248.07060; 250.08626; 251.11789; 262.08626; 264.10191; 265.09715; 267.11280; 271.14410; 279.11280; 281.12845; 283.14410; 293.12845; 295.18049; 297.15975; 305.16484; 307.14410; 321.15975	31.89; 100.00; 35.47; 24.43; 81.09; 65.16; 45.71; 53.89; 67.54; 38.94; 28.53; 23.82; 21.55; 79.53; 32.50; 38.35; 91.92; 55.54; 19.95; 21.52; 65.76; 46.64; 21.98; 26.44; 40.84
344	310.85169	309.844416	C8H4Cl6	C1=CC(=CC=C1C(Cl)(Cl)Cl)C(Cl)(Cl)Cl	6233	274.87501; 310.85169	0.84; 100.00	274.87501; 310.85169	1.52; 100.00	51.02293; 94.94498; 132.96063; 168.93731; 178.92166; 248.85936; 274.87501; 310.85169	47.80; 24.77; 64.51; 92.00; 100.00; 30.13; 44.37; 35.08
345	197.15361	196.1463299	C12H20O2	C=COCC1CCC(CC1)COC=C	3437285	95.08553; 153.12739; 197.15361	7.94; 8.51; 100.00	57.03349; 59.04914; 93.06988; 95.08553; 97.10118; 109.10118; 139.11174; 151.11174; 153.12739; 197.15361	15.09; 5.04; 38.65; 27.98; 12.50; 10.23; 24.49; 10.53; 20.52; 100.00	41.00219; 41.03858; 43.01784; 45.03349; 55.05423; 57.03349; 69.06988; 81.03349; 81.06988; 83.04914; 93.06988; 95.08553; 97.10118; 105.06988; 107.08553; 109.10118; 111.11683; 123.08044; 125.09609; 135.08044; 153.12739	15.31; 14.21; 39.98; 26.87; 31.95; 100.00; 26.15; 37.98; 8.76; 27.74; 17.13; 13.66; 13.77; 12.32; 26.17; 17.76; 11.07; 24.40; 16.80; 10.49; 8.43
346	400.94126	399.933988	C16H8Cl4N2O2	C1=CC(=CC=C1OC2=C(C=C(C=N2)Cl)Cl)OC3=C(C=C(C=N3)Cl)Cl	5382	340.96459; 400.94126	0.21; 100.00	373.93037; 400.94126	17.63; 100.00	60.98395; 147.97153; 187.96645; 199.96645; 225.98210; 253.97701; 254.97226; 255.99266; 267.99266; 277.97701; 280.98791; 313.95369; 337.95369; 371.91472; 373.93037; 374.92561	38.51; 32.51; 24.06; 85.04; 100.00; 88.01; 36.61; 29.51; 57.04; 40.34; 97.50; 23.60; 63.10; 81.17; 97.87; 84.95
347	91.07536	90.06807956	C4H10O2	C(CCO)CO	8064	55.05423; 73.06479	100.00; 38.03	55.05423; 73.06479	100.00; 11.19	45.03349; 55.05423	13.11; 100.00
348	199.09648	198.0892089	C10H14O4	C=CC(=O)OCCCCOC(=O)C=C	70613	55.01784; 55.05423; 57.03349; 71.04914; 73.06479; 125.05971; 127.07536; 145.08592	100.00; 91.61; 15.12; 31.54; 55.29; 22.16; 60.34; 24.09	55.01784; 55.05423; 57.03349; 57.06988; 71.04914; 73.02841; 73.06479; 85.02841; 123.04406; 125.05971; 127.07536	45.58; 100.00; 26.69; 11.36; 10.49; 20.45; 27.03; 14.34; 9.69; 8.68; 21.09	53.03858; 55.01784; 55.05423; 57.03349; 57.06988; 69.03349; 71.01276; 71.04914; 73.02841	5.08; 36.88; 100.00; 14.15; 7.20; 6.43; 6.62; 10.10; 18.84
349	203.12779	202.1205091	C10H18O4	C1C(O1)COCCCCOCC2CO2	17046	55.05423; 57.03349; 57.06988; 59.04914; 85.06479; 111.08044; 129.09101; 185.11722; 203.12779	14.66; 99.68; 14.59; 13.80; 11.59; 19.83; 17.19; 46.48; 100.00	39.02293; 43.01784; 57.03349; 57.06988; 59.04914; 71.04914; 73.06479; 97.06479; 111.08044; 113.09609; 125.05971; 185.11722; 203.12779	9.22; 20.13; 80.39; 15.75; 9.71; 14.27; 10.23; 21.47; 22.23; 9.48; 31.46; 42.39; 100.00	39.02293; 41.00219; 41.03858; 43.01784; 57.03349; 59.04914; 71.04914; 125.05971; 127.07536; 185.11722; 201.11214; 203.12779	24.70; 12.69; 16.32; 38.44; 84.80; 19.28; 16.92; 38.91; 30.73; 21.48; 69.57; 100.00
350	173.08083	172.0735589	C8H12O4	C1CC(CCC1C(=O)O)C(=O)O	14106	81.06988; 127.07536; 173.08084	45.77; 34.74; 100.00	44.99711; 81.06988; 111.08044; 127.07536; 129.09101; 155.07027; 173.08084	10.64; 100.00; 17.39; 36.75; 10.95; 32.25; 25.42	31.01784; 41.03858; 44.99711; 55.05423; 65.03858; 67.05423; 69.03349; 71.01276; 79.05423; 81.06988; 89.05971; 97.02841; 107.04914; 125.05971; 155.07027	13.03; 89.59; 15.71; 57.91; 18.49; 16.63; 14.77; 10.40; 52.28; 100.00; 11.84; 44.00; 19.31; 24.88; 15.83
351	145.12231	144.1150297	C8H16O2	C1CC(CCC1CO)CO	7735	95.08553; 97.10118; 109.10118; 113.09609; 127.11174; 145.12231	100.00; 45.73; 93.86; 48.33; 83.04; 46.13	39.02293; 41.03858; 45.03349; 55.05423; 57.03349; 57.06988; 59.04914; 71.04914; 73.06479; 81.06988; 95.08553; 97.10118; 99.11683; 109.10118; 127.11174	14.52; 46.65; 19.22; 100.00; 27.58; 26.62; 17.35; 44.36; 45.24; 20.47; 51.58; 48.99; 18.49; 61.28; 64.92	29.03858; 39.02293; 41.03858; 43.05423; 45.03349; 53.03858; 55.05423; 57.03349; 57.06988; 69.06988; 71.04914; 73.06479; 81.06988; 143.10666	22.59; 94.77; 88.11; 35.22; 15.60; 17.69; 100.00; 34.13; 33.28; 58.96; 35.89; 17.56; 40.17; 17.39
352	163.07536	162.0680796	C10H10O2	CC(=O)C1=CC=C(C=C1)C(=O)C	13888	43.01784; 163.07536	67.24; 100.00	43.01784; 163.07536	100.00; 65.15	43.01784; 63.02293; 77.03858; 87.02293; 91.01784; 93.03349; 95.04914; 101.03858; 103.05423; 119.04914; 127.05423; 145.06479	97.93; 22.06; 49.45; 36.17; 22.22; 78.06; 30.96; 31.05; 38.64; 29.00; 100.00; 46.14
353	239.0815	238.0742276	C14H10N2O2	C1=CC=C2C(=C1)C(=O)C3=C(C=CC(=C3C2=O)N)N	31420	211.08659; 239.08150	0.61; 100.00	212.07060; 239.08150	5.94; 100.00	79.05423; 80.04948; 105.03349; 107.06037; 133.03964; 135.05529; 159.04406; 187.05020; 189.06585; 199.05020; 209.03455; 211.05020; 213.06585; 223.05020; 237.06585	48.72; 15.63; 15.88; 23.44; 20.97; 15.16; 14.96; 61.46; 20.46; 100.00; 17.66; 20.74; 32.97; 19.55; 18.18
354	113.10732	112.1000484	C6H12N2	C1CN2CCN1CC2	9237	111.09167; 113.10732	0.09; 100.00	111.09167; 113.10732	0.07; 100.00	111.09167; 113.10732	13.91; 100.00
355	234.87525	233.86798	C6H4Br2	C1=CC(=CC=C1Br)Br	7804	128.93344; 234.87525	1.07; 100.00	140.93344; 234.87525	0.92; 100.00	116.93344; 140.93344; 234.87525	12.91; 32.94; 100.00
356	214.90655	213.89928	C4H8Br2	C(CCBr)CBr	8056	134.98039; 214.90655	20.19; 100.00	55.05423; 134.98039; 214.90655	61.49; 100.00; 43.25	41.03858; 55.05423; 134.98039	80.46; 100.00; 30.08
357	175.00758	174.0003056	C8H8Cl2	CC1=CC(=C(C=C1Cl)C)Cl	70755	139.03090; 175.00758	8.32; 100.00	110.99960; 113.01525; 139.03090; 144.96063; 146.97628; 148.99193; 172.99193; 175.00758	18.75; 35.50; 9.65; 10.45; 12.82; 15.38; 100.00; 26.04	65.03858; 79.05423; 89.03858; 98.99960; 103.05423; 108.98395; 110.99960; 113.01525; 125.01525; 137.01525; 139.03090; 158.97628; 172.99193; 175.00758	15.07; 22.05; 91.06; 24.96; 98.69; 31.92; 43.29; 86.51; 33.57; 20.53; 100.00; 64.35; 48.67; 16.80
358	176.98685	175.9795702	C7H6Cl2O	COC1=C(C=CC(=C1)Cl)Cl	16125	59.04914; 176.98685	3.49; 100.00	141.01017; 0.0061236); 176.98685	11.90; ; 100.00	51.02293; 53.03858; 60.98395; 72.98395; 81.03349; 84.98395; 86.99960; 88.97887; 98.99960; 113.01525; 117.01017; 118.94498; 120.96063; 126.99452; 132.96063; 141.01017; 176.98685	32.28; 36.77; 33.60; 57.04; 30.72; 64.09; 26.68; 25.93; 100.00; 29.90; 42.83; 39.07; 22.81; 38.58; 36.68; 88.52; 32.18
359	146.97628	145.9690055	C6H4Cl2	C1=CC(=CC=C1Cl)Cl	4685	84.98395; 146.97628	1.07; 100.00	96.98395; 146.97628	0.92; 100.00	72.98395; 96.98395; 146.97628	12.91; 32.94; 100.00
360	135.11683	134.1095504	C10H14	CCC1=CC=C(C=C1)CC	7734	107.08553; 135.11683	16.56; 100.00	79.05423; 81.06988; 91.05423; 93.06988; 105.06988; 107.08553; 109.10118; 119.08553; 135.11683	26.69; 37.94; 26.32; 23.69; 71.13; 61.41; 55.12; 19.87; 100.00	51.02293; 53.03858; 55.05423; 65.03858; 67.05423; 77.03858; 79.05423; 81.06988; 109.10118; 119.08553; 133.10118	100.00; 49.08; 35.20; 79.59; 47.05; 34.06; 86.45; 32.86; 42.04; 54.38; 32.70
361	205.04953	204.0422587	C11H8O4	C1=CC=C2C(=C1)C(=CC(=C2O)C(=O)O)O	671	187.03897; 205.04954	100.00; 80.75	159.04406; 187.03897; 205.04954	100.00; 92.00; 76.11	41.00219; 55.01784; 65.03858; 77.03858; 79.05423; 101.03858; 105.03349; 121.02841; 131.04914; 153.01824; 159.04406	10.18; 10.90; 10.27; 73.48; 100.00; 9.77; 44.75; 18.59; 12.27; 8.60; 15.17
362	241.04953	240.0422587	C14H8O4	C1=CC=C2C(=C1)C(=O)C3=C(C=CC(=C3C2=O)O)O	6688	213.05462; 241.04954	0.60; 100.00	213.05462; 241.04954	1.79; 100.00	51.02293; 63.02293; 77.03858; 79.05423; 105.03349; 107.04914; 109.02841; 135.00767; 137.02332; 201.01824; 213.05462	33.22; 24.03; 33.14; 55.65; 100.00; 13.60; 31.17; 18.83; 15.11; 12.54; 14.04
363	163.14813	162.1408506	C12H18	CC(C)C1=CC=C(C=C1)C(C)C	7486	43.05423; 79.05423; 119.08553; 163.14813	16.79; 15.90; 23.45; 100.00	43.05423; 79.05423; 91.05423; 107.08553; 119.08553; 121.10118; 123.11683; 163.14813	61.94; 24.99; 15.72; 20.01; 100.00; 25.98; 29.43; 36.18	41.03858; 43.05423; 51.02293; 65.03858; 75.02293; 77.03858; 79.05423; 81.06988; 91.05423; 95.08553; 105.06988; 107.08553; 147.11683	43.80; 48.30; 14.30; 22.40; 30.57; 30.25; 100.00; 32.21; 26.57; 22.10; 21.44; 14.50; 15.12
364	157.10118	156.0939004	C12H12	CC1=CC=C(C2=CC=CC=C12)C	11304	127.05423; 157.10118	4.92; 100.00	79.05423; 101.03858; 103.05423; 127.05423; 129.06988; 157.10118	15.29; 9.19; 20.12; 12.54; 9.69; 100.00	75.02293; 77.03858; 91.05423; 101.03858; 103.05423; 105.06988; 129.06988; 131.08553; 139.05423; 141.06988	16.94; 55.80; 27.77; 25.72; 34.23; 19.91; 24.89; 17.09; 15.85; 100.00
365	271.19039	270.1831093	C15H26O4	C1CCCCCC(=O)OCCOC(=O)CCCCC1	61014	253.17982; 271.19039	16.04; 100.00	253.17982; 271.19039	33.69; 100.00	253.17982; 271.19039	96.41; 100.00
366	257.17474	256.1674592	C14H24O4	C1CCCCCC(=O)OCCOC(=O)CCCC1	41270	239.16417; 257.17474	15.66; 100.00	239.16417; 257.17474	33.50; 100.00	239.16417; 257.17474	96.46; 100.00
367	89.05971	88.05242949	C4H8O2	C1COCCO1	31275	43.01784; 45.03349; 89.05971	43.08; 100.00; 27.31	43.01784; 45.03349; 57.03349; 59.04914	92.81; 100.00; 71.81; 94.54	43.01784; 45.03349; 57.03349	100.00; 93.24; 48.02
368	121.04953	120.0422587	C4H8O4	C1COC(C(O1)O)O	96170	43.01784; 45.03349; 61.02841; 85.02841; 103.03897; 121.04954	79.26; 60.33; 61.38; 31.66; 100.00; 37.37	43.01784; 45.03349; 59.01276; 61.02841; 63.04406	35.66; 100.00; 17.65; 37.18; 13.07	29.03858; 31.01784; 43.01784; 45.03349; 47.01276; 47.04914; 59.01276; 61.02841	27.75; 11.76; 70.96; 100.00; 19.54; 11.68; 24.94; 27.22
369	121.01402	120.0067426	C4H8S2	C1CSCCS1	10452	58.99500; 73.01065; 121.01402	10.96; 11.16; 100.00	46.99500; 58.99500; 61.01065; 73.01065; 92.98272	62.19; 94.50; 100.00; 67.17; 84.39	46.99500; 58.99500	100.00; 80.00
370	131.08553	130.0782503	C10H10	C=CC1=CC=C(C=C1)C=C	66041	105.06988; 131.08553	2.96; 100.00	65.03858; 75.02293; 77.03858; 79.05423; 103.05423; 105.06988; 115.05423; 131.08553	12.28; 10.16; 13.87; 17.44; 13.13; 38.39; 13.92; 100.00	51.02293; 53.03858; 63.02293; 65.03858; 75.02293; 77.03858; 79.05423; 105.06988	100.00; 26.24; 31.19; 38.57; 36.43; 41.88; 40.59; 18.44
371	83.08553	82.07825032	C6H10	CC=CCC=C	11599	41.03858; 43.05423; 55.05423; 81.06988; 83.08553	100.00; 23.45; 86.87; 26.69; 84.88	41.03858; 55.05423; 67.05423	100.00; 74.13; 94.16	41.03858; 55.05423; 67.05423; 79.05423	45.80; 100.00; 73.90; 56.08
372	159.09167	158.0843983	C10H10N2	C1=CC=C2C(=C1)C(=CC=C2N)N	16719	128.04948; 159.09167	1.26; 100.00	132.08078; 159.09167	12.05; 100.00	77.03858; 79.05423; 104.04948; 106.06513; 115.05423; 116.04948; 119.06037; 128.04948; 130.06513; 143.06037; 157.07602	58.25; 100.00; 30.95; 11.65; 21.60; 12.47; 20.14; 17.13; 23.18; 24.23; 15.64
373	175.1441	174.1368278	C8H18N2O2	C1CN(CCN1CCO)CCO	67151	157.13354; 175.14410	3.99; 100.00	45.03349; 157.13354; 175.14410	12.10; 14.66; 100.00	42.03383; 44.04948; 45.03349; 56.04948; 58.06513; 70.06513; 72.08078; 84.08078; 86.06004; 88.07569; 96.08078; 113.10732; 114.09134; 116.10699; 157.13354	29.38; 51.28; 45.19; 54.07; 26.17; 100.00; 20.45; 19.14; 32.57; 43.18; 14.66; 35.50; 75.72; 34.82; 19.80
374	201.20737	200.2000968	C10H24N4	C1CN(CCN1CCCN)CCCN	81629	184.18082; 201.20737	4.90; 100.00	167.15428; 184.18082	58.27; 100.00	58.06513; 70.06513; 73.07602; 82.06513; 84.08078; 86.09643; 97.07602; 98.09643; 99.09167; 101.10732; 110.09643; 112.11208; 115.12297; 125.10732; 127.12297; 128.11822; 129.13862; 130.13387; 141.13862; 158.16517; 167.15428; 173.17607; 184.18082; 199.19172	34.73; 33.16; 24.83; 15.97; 52.36; 20.80; 40.57; 38.77; 85.85; 100.00; 33.83; 26.18; 29.43; 21.80; 99.33; 43.84; 40.50; 17.80; 19.28; 18.41; 34.61; 18.32; 34.81; 17.44
375	163.14813	162.1408506	C12H18	C1CC=CCCC=CCCC=C1	12668	161.13248; 163.14813	0.79; 100.00	161.13248; 163.14813	33.07; 100.00	161.13248; 163.14813	100.00; 63.00
376	109.10118	108.0939004	C8H12	C1CC=CCCC=C1	8135	79.05423; 81.06988; 109.10118	10.08; 13.15; 100.00	41.03858; 55.05423; 65.03858; 67.05423; 79.05423; 81.06988; 93.06988; 109.10118	27.62; 83.75; 32.04; 47.00; 28.00; 31.84; 32.35; 100.00	41.03858; 53.03858; 55.05423; 65.03858; 67.05423; 79.05423; 93.06988	69.45; 59.70; 100.00; 48.98; 69.23; 40.07; 36.09
377	228.9222	227.91493	C5H10Br2	C(CCBr)CCBr	8100	148.99604; 228.92220	17.73; 100.00	43.05423; 55.05423; 69.06988; 146.98039; 148.99604	45.99; 30.87; 100.00; 16.58; 97.69	41.03858; 55.05423; 106.94909; 120.96474	54.08; 100.00; 92.59; 31.42
378	517.13405	516.1267762	C25H24O12	C1C(C(C(CC1(C(=O)O)OC(=O)C=CC2=CC(=C(C=C2)O)O)OC(=O)C=CC3=CC(=C(C=C3)O)O)O)O	205954	121.02841; 145.02841; 163.03897; 181.04954; 291.08631; 319.08123; 321.09688; 331.04484; 337.09179; 355.10236; 453.11801; 471.12857; 499.12349; 517.13405	6.62; 9.48; 100.00; 55.68; 5.49; 21.16; 4.70; 5.79; 16.17; 5.41; 13.94; 22.60; 25.63; 43.79	73.02841; 109.02841; 117.03349; 119.04914; 121.02841; 123.04406; 135.04406; 145.02841; 151.03897; 153.05462; 161.02332; 163.03897; 179.03389; 181.04954; 453.11801; 459.12857; 471.12857; 489.13914; 499.12349; 0.0013492)	7.56; 3.76; 10.81; 3.00; 7.34; 5.05; 23.81; 11.05; 4.81; 3.15; 3.11; 100.00; 3.22; 14.18; 2.21; 3.72; 9.34; 3.23; 3.40;	77.03858; 91.01784; 93.03349; 95.04914; 105.03349; 107.04914; 109.02841; 117.03349; 121.02841; 123.04406; 125.05971; 133.02841; 135.04406; 137.05971; 143.10666; 145.02841; 159.06519; 161.02332; 163.03897; 171.10157; 177.01824; 181.04954; 253.07066; 441.08162; 443.09727; 447.12857; 455.09727; 457.11292; 459.12857; 471.12857; 489.13914	34.18; 9.94; 9.68; 11.44; 25.18; 20.68; 8.78; 71.09; 37.11; 37.94; 12.65; 32.21; 100.00; 10.03; 9.54; 59.45; 14.05; 36.82; 53.42; 13.55; 11.10; 21.76; 17.35; 9.00; 25.64; 9.97; 9.97; 9.04; 33.52; 11.45; 8.76
379	83.08553	82.07825032	C6H10	C=CCCC=C	11598	41.03858; 43.05423; 55.05423; 81.06988; 83.08553	100.00; 23.59; 86.56; 26.80; 85.53	41.03858; 55.05423; 67.05423	100.00; 74.14; 94.37	41.03858; 55.05423; 67.05423; 79.05423	45.50; 100.00; 74.14; 55.94
380	159.09167	158.0843983	C10H10N2	C1=CC2=C(C=CC=C2N)C(=C1)N	16720	132.08078; 159.09167	0.51; 100.00	130.06513; 159.09167	5.39; 100.00	77.03858; 80.04948; 91.05423; 101.03858; 103.05423; 104.04948; 106.06513; 108.08078; 115.05423; 116.04948; 118.06513; 128.04948; 130.06513	26.29; 18.76; 23.77; 20.22; 14.04; 58.53; 28.03; 14.86; 21.98; 16.89; 22.51; 37.07; 100.00
381	105.09101	104.0837296	C5H12O2	C(CCO)CCO	8105	43.05423; 55.05423; 69.06988; 87.08044; 105.09101	14.09; 44.41; 100.00; 67.95; 20.02	43.05423; 69.06988; 87.08044	13.46; 100.00; 8.50	41.03858; 45.03349; 55.05423; 69.06988	100.00; 82.60; 35.06; 31.21
382	242.93785	241.93058	C6H12Br2	C(CCCBr)CCBr	12368	136.99604; 242.93785	5.44; 100.00	55.05423; 57.06988; 83.08553; 106.94909; 108.96474; 163.01169; 242.93785	43.27; 100.00; 60.39; 64.51; 30.79; 92.61; 34.60	41.03858; 55.05423; 106.94909; 120.96474; 134.98039; 242.93785	22.34; 41.67; 100.00; 35.99; 11.53; 9.01
383	155.03888	154.0316058	C6H12Cl2	C(CCCCl)CCCl	16551	93.04655; 105.04655; 119.06220; 155.03888	10.70; 4.90; 19.55; 100.00	55.05423; 57.06988; 62.99960; 65.01525; 77.01525; 83.08553; 119.06220; 153.02323; 155.03888	37.26; 84.71; 100.00; 54.83; 25.54; 29.96; 82.99; 22.56; 74.88	41.03858; 43.05423; 55.05423; 62.99960; 69.06988; 77.01525; 91.03090	33.82; 11.59; 43.67; 100.00; 12.87; 27.16; 13.04
384	169.09715	168.0898776	C8H12N2O2	C(CCCN=C=O)CCN=C=O	13192	55.05423; 67.05423; 79.05423; 81.06988; 83.08553; 94.06513; 108.08078; 126.09134; 141.10224; 169.09715	17.34; 14.38; 30.94; 23.77; 77.53; 11.89; 32.61; 100.00; 16.53; 17.89	44.01309; 55.05423; 56.01309; 57.06988; 67.05423; 68.04948; 69.06988; 72.04439; 79.05423; 81.06988; 83.08553; 84.04439; 86.06004; 94.06513; 96.08078; 98.09643; 108.08078; 113.10732; 123.09167; 124.07569; 126.09134; 141.10224; 169.09715	41.76; 34.93; 26.82; 14.76; 8.62; 8.40; 20.31; 44.18; 32.09; 75.18; 100.00; 16.89; 10.32; 26.44; 17.30; 41.39; 22.10; 18.55; 19.43; 13.35; 66.19; 37.99; 12.04	42.03383; 44.01309; 55.05423; 56.01309; 58.02874; 67.05423; 69.06988; 70.02874; 78.03383; 79.05423; 80.04948; 81.06988; 82.06513; 92.04948; 94.06513; 96.04439; 96.08078; 98.06004; 106.06513; 108.08078; 109.07602; 111.09167; 113.10732; 119.06037; 133.07602	5.53; 100.00; 23.30; 44.24; 8.21; 10.70; 5.73; 11.65; 5.12; 10.93; 26.57; 8.80; 8.65; 6.92; 48.27; 11.43; 19.34; 6.13; 6.84; 6.08; 10.68; 14.00; 14.36; 8.36; 8.60
385	157.10118	156.0939004	C12H12	CC1=CC2=CC=CC(=C2C=C1)C	11328	141.06988; 157.10118	2.23; 100.00	141.06988; 157.10118	10.69; 100.00	89.03858; 91.05423; 105.06988; 115.05423; 117.06988; 129.06988; 141.06988	38.12; 40.33; 78.46; 33.69; 65.72; 33.24; 100.00
386	117.13862	116.1313485	C6H16N2	C(CCCN)CCN	16402	71.08553; 83.08553; 100.11208; 117.13862	19.61; 36.13; 100.00; 62.68	43.05423; 55.05423; 57.06988; 58.06513; 83.08553; 100.11208	12.99; 52.89; 19.53; 23.07; 100.00; 39.46	30.03383; 41.03858; 44.04948; 55.05423; 58.06513; 72.08078	19.62; 42.96; 54.82; 61.44; 100.00; 78.77
387	119.10666	118.0993797	C6H14O2	C(CCCO)CCO	12374	43.05423; 55.05423; 69.06988; 83.08553; 87.08044; 101.09609; 119.10666	27.44; 40.91; 100.00; 42.62; 28.43; 51.49; 23.20	43.05423; 55.05423; 57.06988; 69.06988; 83.08553; 101.09609	20.49; 78.32; 100.00; 31.78; 77.65; 16.93	41.03858; 43.05423; 45.03349; 55.05423	29.99; 28.21; 100.00; 34.51
388	227.12779	226.1205091	C12H18O4	C=CC(=O)OCCCCCCOC(=O)C=C	25644	45.03349; 55.01784; 55.05423; 69.06988; 73.02841; 79.05423; 81.06988; 83.08553; 97.06479; 99.04406; 99.08044; 125.05971; 155.10666; 157.12231; 173.11722; 227.12779	8.40; 100.00; 20.94; 6.71; 6.54; 7.32; 18.64; 10.85; 13.26; 6.11; 20.42; 11.32; 30.66; 8.31; 20.14; 71.08	41.03858; 45.03349; 55.01784; 55.05423; 57.03349; 59.04914; 67.05423; 69.06988; 73.02841; 73.06479; 79.05423; 81.06988; 83.08553; 85.02841; 97.06479; 99.08044; 111.04406; 113.05971; 125.05971; 153.09101; 155.10666; 209.11722	11.02; 20.28; 81.94; 73.97; 53.53; 19.06; 14.75; 18.28; 47.30; 14.64; 33.06; 100.00; 97.81; 15.28; 30.47; 23.43; 12.12; 11.70; 12.98; 27.09; 22.55; 16.21	41.03858; 43.05423; 53.00219; 55.01784; 55.05423; 57.03349; 65.03858; 67.05423; 69.06988; 73.02841; 79.05423; 81.06988; 83.08553; 85.02841; 95.04914; 97.06479; 99.08044	15.87; 28.03; 11.45; 84.89; 46.33; 51.67; 11.18; 26.33; 10.72; 48.70; 34.60; 88.01; 100.00; 10.73; 16.03; 44.94; 19.17
389	255.15909	254.1518092	C14H22O4	CC(=C)C(=O)OCCCCCCOC(=O)C(=C)C	81080	41.03858; 69.03349; 71.04914; 81.06988; 83.08553; 87.04406; 169.12231; 187.13287; 237.14852; 255.15909	40.68; 88.20; 12.52; 15.99; 8.87; 32.14; 67.18; 12.57; 66.01; 100.00	41.03858; 69.03349; 69.06988; 71.04914; 79.05423; 81.06988; 83.08553; 87.04406; 97.06479; 99.04406; 101.05971; 111.08044; 113.05971; 149.09609; 151.11174; 167.10666; 169.12231; 219.13796; 221.11722; 237.14852; 255.15909	37.92; 100.00; 10.46; 40.38; 9.31; 22.28; 14.91; 77.86; 8.93; 38.90; 40.95; 36.47; 8.24; 10.87; 14.94; 14.60; 21.67; 24.26; 8.10; 30.73; 15.18	41.03858; 43.05423; 55.05423; 69.03349; 71.04914; 79.05423; 81.06988; 83.08553; 87.04406; 95.04914; 97.06479; 99.04406; 99.08044; 125.05971; 165.09101	100.00; 16.65; 9.15; 40.59; 26.82; 15.97; 16.60; 19.09; 34.42; 20.18; 24.78; 11.34; 9.65; 10.85; 8.83
390	157.12231	156.1150297	C9H16O2	C1CCOC2(C1)CCCCO2	67437	41.03858; 43.05423; 55.05423; 57.06988; 81.06988; 83.04914; 85.06479; 97.06479; 99.08044; 101.05971; 101.09609; 111.08044; 113.09609; 139.11174; 157.12231	13.56; 12.46; 20.77; 9.23; 11.23; 40.91; 34.39; 36.36; 63.56; 38.49; 16.49; 10.13; 38.29; 100.00; 86.76	39.02293; 41.03858; 43.01784; 43.05423; 45.03349; 53.03858; 55.05423; 57.03349; 57.06988; 83.04914; 85.06479; 97.06479; 99.08044; 111.08044; 113.09609; 115.07536; 125.09609; 127.11174; 139.11174; 157.12231	18.58; 50.81; 22.92; 42.65; 85.14; 20.11; 100.00; 19.36; 21.57; 48.77; 97.07; 19.14; 61.75; 39.25; 27.69; 20.56; 34.11; 28.09; 71.91; 90.41	39.02293; 41.03858; 43.01784; 45.03349; 53.03858; 55.05423; 57.03349; 67.05423; 81.06988; 83.04914; 85.06479; 99.08044; 125.09609	20.06; 55.21; 22.74; 23.11; 31.36; 100.00; 27.77; 26.96; 27.26; 27.99; 53.98; 27.81; 29.33
391	227.07027	226.0629942	C14H10O3	C1=CC2=CC3=C(C(=CC=C3)O)C(=C2C(=C1)O)O	10187	199.07536; 227.07027	0.23; 100.00	199.07536; 227.07027	4.76; 100.00	65.03858; 105.03349; 107.04914; 133.02841; 171.08044; 173.05971; 181.06479; 197.05971; 199.03897; 199.07536; 201.05462; 225.05462; 227.07027	46.04; 33.53; 95.33; 29.25; 73.86; 39.88; 60.80; 100.00; 56.45; 31.00; 37.73; 45.39; 29.20
392	155.14304	154.1357652	C10H18O	CC1(C2CCC(O1)(CC2)C)C	2758	139.11174; 155.14304	1.21; 100.00	153.12739; 155.14304	3.83; 100.00	139.11174; 155.14304	61.19; 100.00
393	171.18557	170.1782987	C10H22N2	CC1(CCC(CC1)C(C)(C)N)N	6650	84.08078; 95.08553; 97.10118; 98.09643; 114.12773; 154.15903; 171.18558	10.20; 22.34; 15.04; 9.91; 9.33; 100.00; 66.58	55.05423; 58.06513; 60.08078; 82.06513; 84.08078; 95.08553; 97.10118; 98.09643; 112.11208; 114.12773; 138.12773; 154.15903; 171.18558	19.55; 51.92; 22.74; 14.99; 37.57; 100.00; 66.59; 17.37; 63.56; 35.00; 21.53; 53.02; 36.42	41.03858; 53.03858; 55.05423; 58.06513; 67.05423; 69.06988; 70.06513; 81.06988; 82.06513; 84.08078; 95.08553; 97.10118; 112.11208; 137.13248	100.00; 86.35; 98.75; 76.08; 17.32; 20.79; 23.76; 20.51; 53.76; 53.15; 97.83; 25.11; 19.37; 22.62
394	153.13862	152.1313485	C9H16N2	C1CCC2=NCCCN2CC1	81184	111.09167; 153.13862	0.81; 100.00	111.09167; 153.13862; 0.16278	8.40; 100.00; 0.017546)	41.03858; 54.03383; 55.02907; 55.05423; 56.04948; 67.05423; 68.04948; 69.06988; 83.06037; 94.06513; 96.08078; 97.07602; 109.07602; 111.09167; 123.09167; 125.10732; 151.12297	36.48; 14.30; 13.94; 20.82; 28.98; 22.35; 23.63; 15.61; 48.74; 22.34; 50.80; 20.57; 18.17; 100.00; 19.96; 98.45; 40.25
395	179.09227	178.0849929	C8H18S2	C(CCCCS)CCCS	14493	83.08553; 85.10118; 89.04195; 91.05760; 103.05760; 111.11683; 119.08890; 145.10455; 179.09227	10.85; 14.58; 13.03; 16.14; 9.61; 9.74; 7.66; 50.77; 100.00	57.06988; 69.06988; 71.08553; 83.08553; 97.10118; 111.11683	17.45; 24.14; 100.00; 55.05; 19.47; 57.37	41.03858; 43.05423; 46.99500; 55.05423; 57.06988; 61.01065; 75.02630; 83.08553; 89.04195	96.54; 44.30; 100.00; 47.26; 22.92; 54.53; 63.95; 31.79; 32.30
396	139.14813	138.1408506	C10H18	C=CCCCCCCC=C	15439	41.03858; 55.05423; 57.06988; 67.05423; 69.06988; 71.08553; 81.06988; 83.08553; 85.10118; 97.10118	67.45; 91.95; 25.88; 41.72; 100.00; 36.83; 72.90; 59.09; 27.57; 40.31	41.03858; 55.05423; 57.06988; 67.05423; 69.06988; 81.06988; 83.08553; 95.08553	42.67; 91.62; 30.98; 23.59; 100.00; 28.53; 32.64; 19.77	39.02293; 41.03858; 53.03858; 55.05423; 67.05423; 69.06988; 79.05423; 81.06988; 93.06988	27.76; 38.57; 18.67; 100.00; 42.78; 56.85; 31.02; 24.88; 37.49
397	191.16417	190.1568946	C10H22O3	CCCCOCC(C)OCC(C)O	24752	41.03858; 55.05423; 57.06988; 59.04914; 61.06479; 77.05971; 99.08044; 115.11174; 117.09101; 135.10157; 191.16417	12.77; 9.52; 100.00; 45.95; 34.66; 31.28; 13.25; 17.45; 13.77; 19.80; 8.48	41.03858; 43.05423; 55.05423; 57.06988; 59.04914; 77.05971; 99.08044; 117.09101	34.00; 12.70; 23.16; 95.30; 100.00; 25.16; 40.83; 22.78	41.03858; 43.05423; 57.06988; 59.04914; 99.08044	77.05; 72.57; 100.00; 30.43; 24.62
398	265.15781	264.1505338	C10H24N2O4Si	CCO[Si](CCCNC(=O)N)(OCC)OCC	90258	219.11595; 221.13160; 265.15781	50.07; 87.73; 100.00	29.03858; 44.04948; 58.06513; 61.03964; 73.03964; 75.05529; 87.05529; 89.07094; 101.07094; 103.08659; 149.06285; 151.07850; 165.09415; 175.07850; 191.08465; 192.10505; 207.07956; 209.09521; 219.11595; 237.12651; 265.15781	4.02; 3.83; 5.93; 4.92; 4.73; 4.46; 8.89; 12.54; 15.82; 9.38; 10.78; 6.34; 3.96; 3.73; 8.12; 4.38; 15.57; 11.99; 6.00; 100.00; 13.53	29.03858; 31.05423; 41.03858; 44.01309; 45.03349; 56.04948; 58.06513; 61.03964; 75.05529; 87.05529; 101.07094; 103.08659; 159.08358; 176.11013; 191.08465	41.12; 14.07; 82.71; 33.36; 63.62; 16.16; 64.64; 100.00; 40.84; 13.95; 58.73; 21.53; 23.11; 44.93; 19.94
399	246.25399	245.2467126	C13H31N3O	CC(CN(CCCN(C)C)CCCN(C)C)O	106705	228.24342; 246.25399	6.33; 100.00	58.06513; 86.09643; 183.18558; 201.19614; 228.24342; 246.25399	32.84; 52.36; 29.70; 81.66; 100.00; 98.26	58.06513; 60.08078; 72.08078; 74.09643; 86.09643; 88.11208; 113.10732; 143.15428; 183.18558; 188.21212; 228.24342	100.00; 21.39; 26.75; 13.61; 89.19; 12.93; 11.59; 28.46; 13.86; 16.26; 10.79
400	196.11208	195.1047994	C14H13N	C1CC2=CC=CC=C2NC3=CC=CC=C31	10308	170.09643; 196.11208	0.25; 100.00	194.09643; 196.11208	5.48; 100.00	51.02293; 91.05423; 103.05423; 129.06988; 144.08078; 146.09643; 154.06513; 156.08078; 170.09643; 179.08553; 180.08078; 192.08078; 194.09643; 196.11208	11.71; 15.12; 9.98; 13.40; 100.00; 50.65; 30.29; 23.11; 11.44; 10.75; 22.72; 9.81; 36.77; 8.91
401	241.04147	240.0341926	C15H9ClO	C1=CC=C2C(=C1)C(=C3C=CC=CC3=C2Cl)C=O	82703	239.02582; 241.04147	6.00; 100.00	213.04655; 241.04147	13.04; 100.00	205.06479; 213.04655; 239.02582	42.39; 100.00; 74.18
402	169.15869	168.1514153	C11H20O	C=CCCCCCCCCC=O	8187	41.03858; 43.05423; 55.05423; 57.06988; 67.05423; 69.06988; 71.08553; 81.06988; 83.08553; 95.08553; 97.10118; 109.10118; 137.13248	18.89; 13.78; 100.00; 16.30; 32.19; 93.51; 13.43; 79.19; 48.39; 72.80; 30.84; 22.80; 13.54	41.03858; 55.05423; 57.06988; 67.05423; 69.06988; 71.08553; 79.05423; 81.06988; 83.08553; 95.08553; 97.10118	20.52; 100.00; 17.43; 22.43; 64.41; 16.74; 20.54; 42.72; 29.30; 26.71; 13.46	39.02293; 41.03858; 43.01784; 43.05423; 55.05423; 67.05423; 69.06988; 79.05423; 81.06988; 93.06988	18.59; 33.75; 14.65; 21.13; 100.00; 19.34; 18.39; 32.64; 26.56; 17.73
403	185.15361	184.1463299	C11H20O2	C=CCCCCCCCCC(=O)O	5634	41.03858; 43.05423; 55.05423; 57.06988; 67.05423; 69.06988; 71.04914; 81.06988; 83.08553; 89.05971; 95.08553; 97.10118; 101.05971; 103.07536; 109.10118; 123.11683; 167.14304; 185.15361	21.69; 12.06; 100.00; 18.55; 25.19; 60.96; 63.55; 53.48; 33.29; 66.02; 53.81; 24.55; 13.82; 14.97; 14.75; 13.37; 12.84; 46.91	41.03858; 43.05423; 55.05423; 57.06988; 67.05423; 69.06988; 79.05423; 81.06988; 83.08553; 93.06988; 95.08553	21.42; 12.02; 100.00; 25.27; 33.23; 86.37; 21.07; 41.78; 40.62; 15.83; 26.02	39.02293; 41.03858; 43.05423; 55.05423; 57.06988; 67.05423; 69.06988; 79.05423; 81.06988; 93.06988	9.70; 26.92; 20.40; 100.00; 12.57; 21.27; 22.36; 19.14; 22.00; 13.94
404	265.11615	264.10888	C12H25BrO	C(CCCCCCBr)CCCCCO	137895	43.05423; 55.05423; 57.06988; 69.06988; 71.08553; 83.08553; 85.10118; 97.10118; 111.11683; 115.11174; 129.12739; 134.98039; 136.99604; 148.99604; 151.01169; 177.02734; 179.04299; 191.04299; 193.05864; 247.10559; 265.11615	9.98; 10.93; 16.86; 7.72; 19.87; 6.77; 10.06; 6.96; 9.92; 8.05; 7.22; 7.37; 8.03; 15.66; 11.96; 6.69; 7.13; 13.29; 10.06; 20.66; 100.00	41.03858; 43.05423; 55.05423; 57.06988; 59.04914; 59.08553; 61.06479; 69.06988; 71.08553; 73.06479; 83.08553; 85.10118; 97.10118; 99.11683; 134.98039; 136.99604; 177.02734; 179.04299; 265.11615	15.70; 85.29; 30.64; 100.00; 13.00; 14.08; 12.92; 33.08; 90.73; 20.63; 22.80; 41.72; 19.92; 24.47; 16.00; 12.02; 15.05; 12.27; 13.18	29.03858; 41.03858; 43.05423; 45.03349; 55.05423; 57.06988; 69.06988; 71.08553; 106.94909; 120.96474	12.50; 57.76; 57.66; 74.14; 100.00; 36.00; 18.41; 15.84; 19.83; 17.05
405	279.09542	278.08814	C12H23BrO2	C(CCCCCC(=O)O)CCCCCBr	175468	55.05423; 57.03349; 57.06988; 69.06988; 71.08553; 75.04406; 81.06988; 83.08553; 85.06479; 95.08553; 97.10118; 99.08044; 103.07536; 111.08044; 117.09101; 125.09609; 127.11174; 129.09101; 134.98039; 143.10666; 146.98039; 148.99604; 175.01169; 189.02734; 219.07429; 243.07429; 261.08485; 279.09542	8.35; 4.96; 3.95; 6.30; 4.20; 3.50; 6.61; 12.07; 3.80; 4.46; 6.17; 3.77; 3.60; 3.54; 4.97; 5.09; 5.96; 9.01; 4.03; 7.08; 3.80; 11.47; 3.55; 15.12; 3.96; 6.07; 42.92; 100.00	41.03858; 43.05423; 55.05423; 57.03349; 57.06988; 69.06988; 71.04914; 71.08553; 75.04406; 81.06988; 83.08553; 85.06479; 85.10118; 87.04406; 89.05971; 95.08553; 97.10118; 99.08044; 109.10118; 113.09609; 117.09101; 127.11174; 134.98039; 145.12231; 163.01169; 175.01169; 177.02734; 189.02734; 261.08485; 279.09542	21.53; 37.80; 71.99; 100.00; 84.31; 58.10; 71.91; 51.35; 42.29; 24.78; 61.31; 30.13; 27.61; 14.08; 28.61; 40.74; 44.66; 34.59; 16.46; 24.51; 12.71; 25.40; 15.06; 14.77; 12.97; 13.65; 16.20; 13.28; 23.10; 33.64	41.03858; 43.01784; 43.05423; 55.05423; 57.03349; 57.06988; 59.04914; 67.05423; 69.03349; 69.06988; 71.04914; 71.08553; 81.06988; 83.08553; 85.06479; 95.08553; 106.94909; 109.10118; 120.96474; 134.98039; 146.98039	40.43; 6.86; 29.62; 100.00; 15.17; 17.67; 8.51; 29.89; 6.69; 30.98; 7.95; 9.67; 51.22; 15.08; 8.02; 25.87; 18.22; 8.99; 16.01; 8.72; 7.45
406	301.27372	300.266445	C18H36O3	CCCCCCC(CCCCCCCCCCC(=O)O)O	7789	43.05423; 55.05423; 57.06988; 71.04914; 71.08553; 85.10118; 87.04406; 89.05971; 95.08553; 97.10118; 109.10118; 111.11683; 115.11174; 123.11683; 125.13248; 137.13248; 139.14813; 151.14813; 165.16378; 185.15361; 223.24203; 235.24203; 237.25768; 265.25259; 283.26316; 301.27372	2.66; 2.89; 4.29; 3.38; 2.73; 3.01; 2.12; 4.77; 3.15; 6.99; 2.13; 2.89; 2.45; 3.53; 2.46; 3.53; 5.06; 2.97; 2.27; 3.24; 2.92; 2.16; 4.87; 49.83; 100.00; 55.32	43.05423; 55.05423; 57.06988; 69.06988; 71.04914; 71.08553; 83.08553; 85.06479; 85.10118; 89.05971; 95.08553; 97.10118; 101.09609; 103.07536; 111.11683; 113.09609; 115.11174; 123.11683; 125.13248; 137.13248; 139.14813; 141.16378; 151.14813; 165.16378; 167.17943; 185.18999; 193.19508; 235.24203; 265.25259; 283.26316; 301.27372	12.99; 34.56; 26.28; 22.58; 16.68; 21.27; 24.51; 16.90; 26.85; 8.96; 15.74; 17.36; 10.08; 8.64; 9.30; 13.61; 12.38; 20.02; 11.09; 25.20; 36.15; 10.73; 22.76; 18.84; 9.87; 8.99; 10.11; 8.67; 100.00; 93.55; 30.17	41.03858; 43.05423; 55.01784; 55.05423; 57.03349; 57.06988; 59.04914; 69.06988; 71.04914; 71.08553; 73.02841; 73.06479; 75.04406; 81.06988; 83.08553; 85.06479; 85.10118; 87.04406; 87.08044; 95.08553; 97.10118; 109.10118; 115.11174; 123.11683; 125.09609; 125.13248; 127.14813; 137.13248; 139.14813; 141.16378; 155.17943	61.57; 91.88; 6.06; 100.00; 17.59; 82.28; 10.43; 22.72; 8.14; 25.92; 8.45; 13.53; 6.62; 25.13; 20.50; 11.08; 10.81; 6.88; 10.08; 26.59; 11.49; 11.71; 6.08; 21.83; 10.08; 9.31; 6.09; 9.77; 7.05; 8.69; 7.91
407	257.21112	256.2038448	C15H28O3	C1CCCCCOCCCCOC(=O)CCCC1	23173	239.20056; 257.21112	4.93; 100.00	239.20056; 257.21112	25.70; 100.00	239.20056; 257.21112	80.38; 100.00
408	301.21621	300.2089301	C20H28O2	CC1=C(C(CCC1)(C)C)C=CC(=CC=CC(=CC(=O)O)C)C	5538	79.05423; 91.05423; 107.08553; 119.08553; 123.04406; 123.11683; 129.06988; 131.08553; 133.10118; 135.11683; 137.13248; 149.13248; 159.08044; 173.13248; 175.14813; 177.09101; 179.10666; 189.16378; 201.16378; 239.17943; 241.19508; 245.15361; 255.21073; 257.22638; 259.16926; 265.19508; 283.20564; 301.21621	11.82; 8.88; 8.75; 15.35; 9.41; 26.18; 6.65; 38.74; 13.81; 9.58; 7.96; 6.70; 10.89; 12.99; 27.28; 21.46; 10.46; 8.88; 7.15; 12.25; 26.57; 6.19; 46.85; 7.64; 13.85; 25.35; 42.33; 100.00	79.05423; 89.03858; 91.05423; 93.06988; 105.06988; 107.08553; 117.06988; 119.08553; 121.10118; 123.11683; 129.06988; 131.08553; 133.10118; 135.11683; 137.13248; 173.13248; 185.13248; 187.14813; 199.14813; 201.16378; 223.14813; 231.13796; 239.17943; 241.19508; 243.17434; 245.15361; 253.19508; 255.21073; 259.16926; 265.19508; 283.20564	22.21; 23.84; 30.58; 36.04; 50.28; 22.92; 22.93; 24.40; 24.22; 100.00; 21.11; 45.75; 25.74; 21.98; 52.84; 28.33; 14.74; 22.67; 18.19; 18.45; 14.99; 14.71; 33.45; 30.57; 15.89; 17.00; 17.61; 28.67; 26.28; 71.40; 33.18	55.05423; 63.02293; 65.03858; 67.05423; 77.03858; 79.05423; 89.03858; 91.05423; 93.06988; 103.05423; 105.06988; 107.08553; 109.10118; 117.06988; 119.08553; 121.10118; 123.11683; 131.04914; 131.08553; 133.10118; 135.11683; 145.06479; 145.10118; 147.11683; 149.13248; 199.14813; 225.12739; 229.12231; 231.13796; 245.15361; 257.15361	12.76; 14.82; 34.84; 22.58; 18.18; 71.80; 59.61; 64.36; 42.16; 59.43; 100.00; 38.19; 13.32; 26.09; 55.71; 50.71; 24.30; 12.80; 33.77; 29.02; 16.14; 21.94; 28.05; 16.26; 28.04; 13.06; 13.22; 13.01; 12.98; 13.62; 15.31
409	285.22129	284.2140155	C20H28O	CC1=C(C(CCC1)(C)C)C=CC(=CC=CC(=CC=O)C)C	1070	89.03858; 91.05423; 93.06988; 105.06988; 107.08553; 115.05423; 117.06988; 119.08553; 123.11683; 129.06988; 131.08553; 133.10118; 135.11683; 137.13248; 143.08553; 149.13248; 161.09609; 171.11683; 173.13248; 175.14813; 177.16378; 201.16378; 215.14304; 229.15869; 241.19508; 243.17434; 243.21073; 267.21073; 269.18999; 283.20564; 285.22129	10.23; 33.08; 10.90; 8.63; 11.10; 19.79; 18.98; 33.07; 30.38; 9.67; 24.68; 45.98; 19.84; 12.42; 9.25; 8.65; 36.69; 8.83; 33.68; 76.39; 15.08; 9.09; 8.73; 31.07; 31.46; 27.11; 34.08; 41.49; 8.75; 23.36; 100.00	67.05423; 69.06988; 79.05423; 81.06988; 89.03858; 91.05423; 93.06988; 95.08553; 105.06988; 107.08553; 109.10118; 117.06988; 119.08553; 121.10118; 123.11683; 131.08553; 133.10118; 135.11683; 137.13248; 139.14813; 145.10118; 173.13248; 177.16378; 201.12739; 201.16378; 239.17943; 241.19508; 243.17434; 251.17943; 255.21073; 267.21073	19.70; 23.62; 54.21; 22.98; 22.00; 57.44; 29.95; 20.19; 58.19; 53.42; 18.70; 21.74; 70.55; 38.85; 100.00; 40.91; 38.41; 41.18; 82.16; 22.77; 20.65; 19.09; 23.76; 35.33; 25.66; 18.70; 36.39; 18.87; 22.07; 24.82; 28.57	39.02293; 65.03858; 67.05423; 69.06988; 77.03858; 79.05423; 81.06988; 89.03858; 91.05423; 93.06988; 103.05423; 105.06988; 107.08553; 109.10118; 115.05423; 117.06988; 119.08553; 121.10118; 123.11683; 125.13248; 129.06988; 131.08553; 133.10118; 135.11683; 141.06988; 147.11683; 149.13248; 173.09609; 189.16378; 241.19508; 283.20564	14.28; 18.65; 35.48; 11.40; 21.82; 63.39; 30.97; 46.08; 100.00; 44.39; 42.43; 62.97; 36.14; 13.89; 25.82; 30.61; 35.91; 35.12; 26.09; 16.53; 12.70; 25.79; 19.81; 16.44; 11.82; 11.02; 26.11; 12.56; 13.29; 17.18; 13.89
410	429.29994	428.2926598	C27H40O4	CCCCCC(=O)OC1(CCC2C1(CCC3C2CCC4=CC(=O)CCC34C)C)C(=O)C	3653	71.08553; 99.08044; 241.15869; 243.17434; 269.18999; 295.20564; 297.22129; 313.21621; 315.23186; 319.26316; 321.27881; 331.22677; 385.27372; 411.28937; 429.29994	3.36; 5.04; 9.37; 7.32; 5.90; 13.17; 4.75; 19.58; 9.70; 5.94; 3.81; 15.14; 3.43; 25.60; 100.00	41.03858; 43.05423; 55.05423; 57.06988; 81.06988; 109.06479; 111.08044; 119.04914; 123.08044; 195.13796; 241.15869; 243.17434; 245.18999; 255.17434; 259.20564; 269.18999; 285.18491; 287.20056; 289.21621; 295.20564; 297.22129; 313.21621; 315.19547; 315.23186; 329.21112; 331.22677; 333.24242; 335.25807; 337.27372; 411.28937; 429.29994	23.38; 33.37; 18.40; 9.16; 19.34; 12.24; 19.54; 9.82; 20.41; 14.16; 24.85; 25.42; 28.04; 9.71; 9.90; 21.49; 15.56; 45.70; 10.49; 15.68; 22.84; 65.43; 10.34; 29.58; 9.08; 100.00; 11.19; 20.63; 10.75; 27.67; 22.09	43.01784; 43.05423; 55.05423; 57.06988; 65.03858; 67.05423; 79.05423; 81.06988; 91.05423; 93.06988; 103.05423; 105.06988; 107.08553; 109.06479; 109.10118; 119.04914; 121.10118; 123.08044; 131.04914; 137.09609; 143.08553; 157.10118; 163.11174; 171.08044; 173.09609; 177.12739; 209.15361; 267.19547; 269.18999; 335.25807; 429.29994	17.42; 100.00; 35.39; 21.41; 23.23; 22.03; 61.25; 34.80; 33.70; 25.89; 24.98; 27.18; 15.01; 26.66; 12.95; 21.51; 15.08; 39.96; 13.79; 16.66; 16.43; 31.40; 32.98; 15.74; 34.21; 44.19; 22.71; 15.17; 14.28; 12.61; 13.69
411	273.18491	272.17763	C18H24O2	CC12CCC3C(C1CCC2O)CCC4=C3C=CC(=C4)O	450	255.17434; 273.18491	53.99; 100.00	91.05423; 105.06988; 107.04914; 131.08553; 133.10118; 147.08044; 147.11683; 149.09609; 163.11174; 165.12739; 175.11174; 177.12739; 213.12739; 0.029529; 215.14304; 217.15869; 229.15869; 231.17434; 237.16378; 245.18999; 255.17434; 273.18491	13.51; 9.59; 18.30; 11.68; 28.78; 38.15; 8.86; 25.17; 12.72; 25.62; 11.45; 7.59; 14.16; 0.026451; 20.83; 8.68; 13.47; 8.87; 7.81; 7.91; 99.27; 100.00	79.05423; 81.06988; 83.08553; 91.05423; 93.03349; 95.08553; 105.06988; 107.04914; 113.09609; 125.09609; 127.11174; 129.12739; 131.08553; 133.10118; 145.06479; 145.10118; 147.08044; 151.11174; 153.12739; 159.08044; 161.09609; 175.11174; 177.12739; 213.12739; 215.14304; 0.00047888); 227.14304; 243.17434; 245.18999	13.79; 15.65; 12.70; 26.58; 9.76; 9.51; 15.10; 10.53; 32.11; 15.20; 99.25; 15.06; 19.14; 11.66; 27.21; 7.46; 100.00; 7.26; 14.18; 14.81; 11.60; 18.32; 10.69; 16.54; 16.63; ; 17.92; 8.67; 12.65
412	297.18491	296.17763	C20H24O2	CC12CCC3C(C1CCC2(C#C)O)CCC4=C3C=CC(=C4)O	3285	279.17434; 297.18491	5.70; 100.00	91.05423; 95.04914; 101.03858; 103.05423; 105.06988; 107.04914; 107.08553; 119.04914; 121.06479; 147.08044; 155.08553; 157.06479; 159.08044; 173.09609; 175.11174; 177.12739; 189.12739; 225.12739; 227.14304; 229.15869; 239.14304; 243.17434; 251.14304; 261.16378; 269.15361; 271.16926; 279.17434; 0.19375; 295.16926; 297.18491	10.65; 8.98; 11.36; 15.81; 6.88; 12.65; 9.02; 13.60; 11.68; 9.10; 12.84; 8.56; 29.76; 23.98; 15.02; 27.37; 26.83; 16.69; 10.56; 25.25; 10.31; 11.39; 15.99; 7.49; 10.37; 12.10; 54.58; 0.16064; 11.80; 100.00	41.03858; 67.05423; 77.03858; 79.05423; 81.06988; 91.05423; 93.06988; 95.04914; 95.08553; 101.03858; 103.05423; 105.06988; 107.04914; 107.08553; 109.10118; 119.04914; 119.08553; 121.06479; 131.08553; 147.08044; 151.11174; 161.09609; 173.09609; 175.11174; 177.12739; 185.09609; 187.11174; 189.12739; 201.12739; 215.14304	20.05; 32.60; 41.09; 100.00; 27.91; 59.40; 53.66; 35.24; 29.03; 30.76; 50.43; 30.67; 76.44; 17.83; 39.02; 37.85; 25.09; 63.46; 46.49; 47.67; 25.16; 26.45; 83.75; 81.83; 50.90; 40.34; 36.32; 21.39; 22.54; 33.95
413	331.22677	330.2194948	C21H30O3	CC(=O)C1(CCC2C1(CCC3C2CCC4=CC(=O)CCC34C)C)O	521928	313.21621; 331.22677; 0.57642	36.41; 100.00; 0.5075	109.06479; 111.08044; 121.06479; 123.08044; 139.07536; 159.08044; 161.09609; 163.11174; 173.09609; 175.11174; 177.12739; 187.11174; 191.10666; 193.12231; 195.13796; 241.15869; 243.17434; 245.18999; 255.17434; 257.18999; 259.20564; 267.17434; 269.18999; 285.18491; 287.20056; 295.20564; 303.19547; 313.21621; 0.09622; 329.21112; 331.22677	16.87; 8.62; 7.73; 15.35; 18.60; 15.94; 11.39; 7.96; 12.10; 15.28; 15.27; 10.02; 15.29; 21.56; 8.96; 22.05; 17.06; 29.39; 8.36; 8.46; 7.11; 8.56; 13.80; 8.11; 24.85; 85.73; 10.22; 100.00; 0.094654; 7.93; 65.28	43.01784; 53.03858; 55.05423; 65.03858; 67.05423; 79.05423; 81.06988; 91.05423; 93.06988; 95.04914; 97.06479; 103.05423; 105.06988; 107.04914; 107.08553; 109.06479; 123.08044; 133.06479; 147.11683; 157.06479; 157.10118; 163.11174; 165.09101; 169.12231; 173.09609; 177.12739; 187.11174; 189.12739; 191.14304; 193.15869; 225.12739	12.16; 13.60; 21.47; 15.63; 29.71; 27.52; 35.37; 100.00; 36.78; 20.74; 14.47; 11.21; 34.97; 15.67; 16.45; 45.98; 21.22; 12.04; 12.19; 16.62; 11.14; 14.71; 20.29; 26.16; 12.63; 25.56; 20.29; 17.43; 40.90; 24.19; 12.13
414	271.16926	270.1619799	C18H22O2	CC12C=CC3=C4CCC(=O)C=C4CCC3C1CCC2O	4092426	253.15869; 0.019493); 271.16926	49.25; ; 100.00	79.05423; 81.06988; 83.08553; 97.06479; 99.08044; 101.09609; 147.08044; 149.09609; 171.08044; 173.09609; 211.11174; 0.052654; 213.12739; 215.14304; 227.14304; 229.15869; 235.14813; 243.13796; 253.15869; 271.16926	9.48; 7.76; 11.69; 12.49; 10.52; 10.48; 16.08; 5.94; 5.85; 18.26; 8.13; 0.051754; 15.17; 9.52; 13.49; 11.63; 8.97; 10.70; 75.95; 100.00	79.05423; 81.06988; 83.08553; 91.05423; 95.08553; 103.05423; 105.06988; 107.08553; 109.06479; 109.10118; 111.08044; 117.06988; 119.08553; 125.09609; 129.06988; 145.06479; 147.08044; 149.09609; 159.08044; 161.09609; 171.08044; 173.09609; 209.09609; 211.11174; 213.12739; 215.14304; 225.12739; 227.14304; 229.15869; 241.12231; 243.17434	31.71; 40.96; 23.18; 20.64; 28.61; 15.55; 30.86; 25.06; 13.26; 37.92; 16.34; 16.77; 37.16; 13.94; 20.34; 23.92; 100.00; 32.90; 20.74; 39.76; 22.09; 34.17; 17.43; 54.67; 49.70; 16.62; 22.90; 31.18; 13.81; 13.84; 16.77
415	303.23186	302.2245802	C20H30O2	CC12CCC(=O)C=C1CCC3C2CCC4(C3CCC4(C)O)C	4160	121.06479; 177.12739; 243.17434; 245.18999; 285.22129; 2.4529; 303.23186	3.27; 3.05; 3.70; 6.59; 100.00; 1.4747; 62.20	91.05423; 95.08553; 107.08553; 109.06479; 111.08044; 113.09609; 115.11174; 119.08553; 121.06479; 123.08044; 125.09609; 137.09609; 143.08553; 161.09609; 163.11174; 165.12739; 175.11174; 189.12739; 191.14304; 193.15869; 195.17434; 229.15869; 231.17434; 233.18999; 243.17434; 245.18999; 257.18999; 267.21073; 285.22129; 303.23186	14.30; 19.41; 6.78; 20.36; 24.67; 7.48; 34.51; 6.89; 9.36; 13.47; 6.38; 12.22; 7.09; 14.29; 6.16; 9.73; 24.09; 6.11; 9.57; 8.37; 6.15; 15.17; 10.09; 6.42; 15.19; 21.45; 11.62; 6.73; 33.07; 100.00	41.03858; 43.05423; 55.05423; 69.06988; 75.08044; 79.05423; 81.06988; 91.05423; 93.06988; 95.08553; 107.04914; 109.06479; 109.10118; 111.08044; 119.08553; 121.06479; 123.08044; 127.11174; 133.10118; 137.09609; 147.11683; 163.11174; 175.11174; 189.12739; 191.14304; 231.17434; 243.17434; 245.18999; 257.18999	22.43; 53.19; 26.60; 17.74; 29.34; 51.70; 40.43; 100.00; 45.89; 72.01; 13.04; 66.40; 14.74; 25.84; 12.99; 25.55; 29.69; 17.13; 21.71; 35.13; 12.14; 19.25; 18.27; 12.14; 18.46; 12.20; 16.11; 21.95; 16.01
416	151.08659	150.0793129	C8H10N2O	CC(=O)NNC1=CC=CC=C1	8247	43.01784; 151.08659	100.00; 36.25	43.01784; 79.05423; 107.06037; 109.07602; 133.07602; 151.08659	100.00; 80.85; 52.81; 63.68; 89.53; 62.36	43.01784; 63.02293; 65.03858; 77.03858; 79.05423	19.64; 13.81; 87.62; 58.26; 100.00
417	379.89163	378.88435	C14H7Br2NO2	C1=CC=C2C(=C1)C(=O)C3=C(C2=O)C(=C(C=C3Br)Br)N	6681	275.86541; 379.89163	0.09; 100.00	275.86541; 379.89163; 0.05239	1.37; 100.00; 0.050347	51.02293; 105.03349; 248.85452; 272.95457; 275.86541; 301.84468; 352.88073; 353.87598; 377.87598; 379.89163	8.48; 23.63; 6.82; 9.71; 100.00; 7.08; 7.47; 17.33; 6.77; 43.03
418	238.08625	237.0789786	C15H11NO2	CC1=C(C2=C(C=C1)C(=O)C3=CC=CC=C3C2=O)N	6702	221.05971; 238.08626	2.62; 100.00	220.07569; 238.08626	3.79; 100.00	51.02293; 53.03858; 63.02293; 77.03858; 79.05423; 105.03349; 106.06513; 107.04914; 133.02841; 134.06004; 159.04406; 161.05971; 170.06004; 171.04406; 183.04406; 184.03930; 186.05495; 188.07060; 191.04914; 198.05495; 209.05971; 210.09134; 211.07536; 212.07060; 220.07569; 221.05971; 238.08626	36.99; 16.98; 23.36; 31.80; 20.30; 100.00; 34.26; 18.29; 15.69; 34.80; 28.97; 14.39; 21.43; 35.28; 18.79; 18.65; 19.73; 16.67; 13.37; 48.65; 16.44; 18.44; 31.20; 25.68; 16.95; 17.09; 15.31
419	76.07569	75.06841391	C3H9NO	CC(CN)O	4	58.06513; 76.07569	100.00; 40.57	41.03858; 58.06513	30.38; 100.00	41.03858; 58.06513	100.00; 38.79
420	381.93793	380.93066	C14H8BrNO5S	C1=CC=C2C(=C1)C(=O)C3=C(C=C(C(=C3C2=O)N)S(=O)(=O)O)Br	22628	353.94302; 381.93793; 0.030339	1.03; 100.00; 0.011403	301.98112; 381.93793	3.12; 100.00	105.03349; 133.02841; 159.04406; 171.04406; 181.02841; 183.04406; 197.95490; 232.95965; 248.95457; 250.97022; 260.95457; 262.97022; 272.95457; 275.96547; 277.91172; 301.98112; 302.01177; 326.93212; 352.91138; 353.94302; 355.92228; 381.93793	46.15; 29.42; 35.29; 14.05; 27.64; 13.07; 19.94; 9.65; 100.00; 10.45; 31.97; 22.57; 89.98; 17.67; 13.03; 16.31; 9.92; 33.73; 11.02; 76.47; 15.54; 12.64
421	163.07536	162.0680796	C10H10O2	CC(=O)CC(=O)C1=CC=CC=C1	7166	43.01784; 119.04914; 163.07536	100.00; 32.28; 44.85	41.00219; 43.01784; 79.05423; 105.03349; 119.04914; 127.05423; 145.06479	28.06; 69.75; 21.97; 73.71; 49.60; 92.00; 100.00	43.01784; 51.02293; 77.03858; 79.05423; 103.05423; 105.03349	9.89; 15.25; 100.00; 11.45; 6.14; 13.94
422	200.99095	199.98368	C8H9BrO	C1=CC=C(C=C1)OCCBr	68526	95.04914; 121.06479; 200.99095	100.00; 21.78; 45.32	67.05423; 79.05423; 93.03349; 95.04914; 106.94909; 121.06479	47.75; 24.89; 21.24; 100.00; 26.28; 25.59	51.02293; 63.02293; 65.03858; 67.05423; 77.03858; 79.05423; 95.04914; 106.94909	22.06; 18.08; 50.57; 38.14; 37.21; 100.00; 24.03; 40.77
423	240.93739	239.93012	C5H6BrClN2O2	CC1(C(=O)N(C(=O)N1Br)Cl)C	61828	120.02107; 240.93739	1.20; 100.00	41.03858; 120.02107; 121.92360; 172.91118; 240.93739	20.68; 12.84; 6.08; 10.95; 100.00	41.03858; 43.05423; 77.97412; 121.92360; 135.97564; 154.90061; 172.91118	100.00; 26.83; 63.21; 23.44; 25.47; 35.41; 13.73
424	186.9753	185.96803	C7H7BrO	COC1=CC(=CC=C1)Br	16971	142.94909; 186.97530	2.60; 100.00	39.02293; 51.02293; 53.03858; 59.04914; 63.02293; 81.03349; 107.04914; 128.93344; 130.94909; 132.96474; 142.94909; 184.95965; 186.97530	8.19; 11.14; 15.79; 7.95; 9.41; 11.75; 8.14; 11.68; 16.30; 15.79; 20.64; 7.25; 100.00	39.02293; 51.02293; 53.03858; 63.02293; 79.05423; 81.03349; 104.93344; 116.93344; 128.93344; 130.94909; 142.94909; 154.94909; 156.96474; 184.95965	24.50; 100.00; 19.26; 91.83; 23.68; 40.34; 20.70; 22.64; 74.03; 22.60; 83.58; 16.76; 73.96; 20.83
425	170.95707	169.94979	C4H8BrCl	C(CCBr)CCl	81364	134.98039; 170.95707	25.51; 100.00	55.05423; 62.99960; 91.03090; 106.94909; 134.98039; 170.95707	95.69; 46.75; 63.67; 44.32; 90.19; 100.00	41.03858; 55.05423; 106.94909; 134.98039	89.65; 100.00; 18.69; 23.63
426	184.99604	183.98876	C8H9Br	CCC1=CC=C(C=C1)Br	15313	81.06988; 184.99604	21.33; 100.00	63.02293; 65.03858; 75.02293; 77.03858; 79.05423; 81.06988; 91.05423; 118.94909; 156.96474; 168.96474; 184.99604	18.81; 100.00; 33.24; 36.29; 67.61; 22.72; 45.88; 25.01; 20.69; 38.62; 96.94	51.02293; 63.02293; 65.03858; 75.02293; 77.03858; 79.05423; 89.03858; 91.05423; 105.06988; 142.94909; 154.94909; 156.96474; 168.96474	37.71; 54.15; 100.00; 44.52; 46.13; 60.13; 18.13; 26.81; 35.91; 20.15; 32.87; 19.45; 71.37
427	174.95532	173.94804	C6H4BrF	C1=CC(=CC=C1F)Br	9993	69.01350; 174.95532	0.45; 100.00	172.93967; 174.95532	7.13; 100.00	57.01350; 69.01350; 81.01350; 128.93344; 146.92402; 148.93967; 172.93967; 174.95532	12.07; 10.78; 32.89; 10.75; 16.40; 16.84; 27.10; 100.00
428	200.99095	199.98368	C8H9BrO	CC1=C(C=CC(=C1)OC)Br	117915	168.96474; 200.99095	3.61; 100.00	41.03858; 67.05423; 81.03349; 93.06988; 107.04914; 118.94909; 121.06479; 142.94909; 144.96474; 146.98039; 156.96474; 168.96474; 172.95965; 172.99604; 174.97530; 200.99095	6.91; 4.33; 5.08; 3.85; 7.58; 3.63; 22.89; 6.62; 5.61; 7.17; 8.20; 12.76; 3.48; 6.61; 3.81; 100.00	39.02293; 41.03858; 65.03858; 67.05423; 77.03858; 91.05423; 116.93344; 118.94909; 140.93344; 142.94909; 144.96474; 156.96474; 168.96474	10.61; 14.87; 64.86; 15.16; 9.10; 15.76; 23.91; 11.09; 82.28; 9.35; 16.77; 100.00; 22.18
429	249.12124	248.11396	C12H25Br	CCCCCCCCCCCCBr	8919	43.05423; 55.05423; 57.06988; 59.08553; 71.08553; 85.10118; 87.11683; 113.13248; 122.98039; 134.98039; 136.99604; 148.99604; 151.01169; 163.01169; 179.04299; 191.04299; 249.12124	13.69; 9.48; 29.70; 7.16; 31.82; 14.91; 7.20; 14.40; 10.51; 12.75; 8.08; 15.89; 7.32; 8.26; 8.95; 7.14; 100.00	43.05423; 55.05423; 57.06988; 59.08553; 69.06988; 71.08553; 83.08553; 85.10118; 99.11683; 134.98039	27.77; 18.09; 100.00; 10.26; 19.36; 50.41; 9.49; 26.66; 13.86; 7.93	41.03858; 43.05423; 55.05423; 57.06988	53.81; 100.00; 44.67; 81.29
430	498.89847	497.89119	C8BrF17	C(C(C(C(C(F)(F)Br)(F)F)(F)F)(F)F)(C(C(C(F)(F)F)(F)F)(F)F)(F)F	9873	478.89224; 498.89847	0.29; 100.00	478.89224; 498.89847	5.16; 100.00	268.98189; 328.90182; 378.89863; 478.89224; 498.89847	9.85; 9.85; 7.61; 41.50; 100.00
431	319.19949	318.19221	C17H35Br	CCCCCCCCCCCCCCCCCBr	19022	43.05423; 57.06988; 71.08553; 85.10118; 179.04299; 193.05864; 319.19949	3.09; 7.48; 5.34; 2.32; 1.86; 1.58; 100.00	41.03858; 43.05423; 55.05423; 57.06988; 59.08553; 69.06988; 71.08553; 73.10118; 85.10118; 97.10118; 113.13248; 115.14813; 127.14813; 129.16378; 177.02734; 191.04299; 193.05864; 319.19949	7.51; 26.49; 12.72; 84.72; 18.21; 11.90; 63.26; 8.58; 15.53; 10.11; 8.72; 10.05; 11.84; 13.51; 7.56; 7.06; 10.67; 100.00	41.03858; 43.05423; 55.05423; 57.06988; 69.06988; 71.08553	18.71; 73.74; 27.25; 100.00; 11.20; 32.56
432	305.18384	304.17656	C16H33Br	CCCCCCCCCCCCCCCCBr	8213	43.05423; 55.05423; 57.06988; 71.08553; 85.10118; 113.13248; 163.01169; 179.04299; 305.18384	3.50; 1.92; 8.02; 5.91; 3.09; 2.39; 2.67; 4.39; 100.00	43.05423; 55.05423; 57.06988; 59.08553; 69.06988; 71.08553; 85.10118; 97.10118; 99.11683; 101.13248; 113.13248; 115.14813; 177.02734; 179.04299; 193.05864; 305.18384	40.89; 19.38; 100.00; 23.10; 23.23; 73.42; 25.37; 17.15; 28.91; 15.90; 16.58; 18.13; 22.01; 23.63; 14.24; 80.36	41.03858; 43.05423; 55.05423; 57.06988; 69.06988; 71.08553	23.11; 98.40; 35.25; 100.00; 14.03; 33.54
433	165.02734	164.02006	C6H13Br	CCCCCCBr	8101	43.05423; 55.05423; 57.06988; 59.08553; 85.10118; 165.02734	54.93; 17.44; 48.84; 14.14; 52.62; 100.00	41.03858; 43.05423; 55.05423; 57.06988	41.15; 100.00; 73.53; 86.20	41.03858; 43.05423; 55.05423; 57.06988; 106.94909	42.34; 100.00; 27.09; 18.18; 23.10
434	193.05864	192.05136	C8H17Br	CCCCCCCCBr	8140	43.05423; 57.06988; 71.08553; 85.10118; 120.96474; 122.98039; 136.99604; 148.99604; 193.05864	26.92; 100.00; 17.10; 10.35; 11.00; 29.55; 14.09; 10.19; 61.69	41.03858; 43.05423; 57.06988; 71.08553	22.92; 48.52; 100.00; 16.74	41.03858; 43.05423; 55.05423; 57.06988	100.00; 92.02; 32.97; 87.37
435	291.16819	290.16091	C15H31Br	CCCCCCCCCCCCCCCBr	12394	43.05423; 57.06988; 71.08553; 85.10118; 87.11683; 99.11683; 163.01169; 179.04299; 191.04299; 193.05864; 291.16819	4.27; 10.13; 9.96; 5.27; 3.52; 3.03; 3.82; 6.16; 4.51; 3.34; 100.00	43.05423; 55.05423; 57.06988; 59.08553; 69.06988; 71.08553; 83.08553; 85.10118; 99.11683; 101.13248; 165.02734; 177.02734; 179.04299; 291.16819	38.41; 28.00; 100.00; 14.28; 27.38; 88.44; 12.92; 45.59; 31.65; 19.18; 12.94; 13.70; 19.94; 50.32	41.03858; 43.05423; 55.05423; 57.06988; 69.06988; 71.08553	24.35; 100.00; 37.40; 89.35; 11.46; 37.96
436	151.01169	150.00441	C5H11Br	CCCCCBr	8057	43.05423; 71.08553; 151.01169	31.81; 54.49; 100.00	41.03858; 43.05423; 71.08553	76.02; 100.00; 78.78	41.03858; 43.05423; 57.06988	100.00; 69.58; 79.26
437	122.98039	121.97311	C3H7Br	CCCBr	7840	43.05423; 122.98039	25.89; 100.00	43.05423; 122.98039	100.00; 41.34	41.03858; 43.05423	44.27; 100.00
438	277.15254	276.14526	C14H29Br	CCCCCCCCCCCCCCBr	8208	43.05423; 55.05423; 57.06988; 71.08553; 73.10118; 85.10118; 99.11683; 136.99604; 148.99604; 163.01169; 179.04299; 191.04299; 193.05864; 277.15254	7.21; 5.61; 13.71; 16.16; 3.53; 10.00; 4.05; 5.48; 4.40; 7.09; 9.20; 5.42; 4.07; 100.00	41.03858; 43.05423; 55.05423; 57.06988; 59.08553; 69.06988; 71.08553; 73.10118; 83.08553; 85.10118; 97.10118; 99.11683; 129.16378; 277.15254	9.31; 31.09; 26.98; 66.88; 12.43; 24.80; 100.00; 9.96; 9.10; 43.71; 8.00; 10.80; 10.51; 22.84	41.03858; 43.05423; 55.05423; 57.06988; 71.08553	28.36; 100.00; 39.98; 89.02; 31.57
439	263.13689	262.12961	C13H27Br	CCCCCCCCCCCCCBr	13000	43.05423; 55.05423; 57.06988; 71.08553; 83.08553; 85.10118; 113.13248; 122.98039; 134.98039; 136.99604; 148.99604; 163.01169; 179.04299; 191.04299; 193.05864; 263.13689	10.68; 8.52; 23.34; 25.23; 5.80; 14.89; 8.15; 6.23; 7.31; 6.34; 9.26; 7.53; 8.73; 12.83; 9.33; 100.00	41.03858; 43.05423; 55.05423; 57.06988; 59.08553; 69.06988; 71.08553; 73.10118; 83.08553; 85.10118; 97.10118; 99.11683	11.54; 31.56; 22.22; 100.00; 13.60; 20.94; 99.08; 8.36; 10.74; 23.55; 9.69; 12.85	41.03858; 43.05423; 55.05423; 57.06988; 71.08553	39.49; 100.00; 43.96; 82.46; 27.16
440	235.10559	234.09831	C11H23Br	CCCCCCCCCCCBr	12744	43.05423; 55.05423; 57.06988; 59.08553; 69.06988; 71.08553; 85.10118; 99.11683; 113.13248; 122.98039; 134.98039; 136.99604; 148.99604; 163.01169; 191.04299; 235.10559	25.94; 13.55; 49.63; 8.07; 7.81; 31.27; 22.03; 13.45; 9.18; 7.56; 11.67; 12.49; 13.92; 11.16; 8.21; 100.00	41.03858; 43.05423; 55.05423; 57.06988; 69.06988; 71.08553; 85.10118; 97.10118	11.96; 56.10; 29.09; 100.00; 28.59; 83.37; 42.94; 14.09	41.03858; 43.05423; 55.05423; 57.06988	83.80; 95.58; 40.62; 100.00
441	91.0576	90.05032149	C4H10S	CCCCS	8012	57.06988; 91.05760	52.71; 100.00	41.03858; 57.06988; 89.04195	27.38; 100.00; 22.31	41.03858; 46.99500; 57.06988	41.32; 100.00; 23.45
442	75.08044	74.07316494	C4H10O	CCCCO	263	57.06988; 75.08044	100.00; 12.36	41.03858; 57.06988	32.31; 100.00	41.03858; 57.06988	100.00; 77.08
443	217.14344	216.1361591	C11H20O4	CCCCOC(=O)C(C)OC(=O)CCC	24114	55.05423; 57.03349; 57.06988; 59.04914; 71.04914; 75.04406; 75.08044; 87.04406; 89.05971; 101.05971; 115.07536; 129.09101; 143.07027; 217.14344	40.16; 27.68; 78.42; 16.91; 50.84; 19.79; 29.53; 25.86; 46.83; 27.17; 48.57; 100.00; 41.25; 58.61	43.05423; 45.03349; 55.05423; 57.03349; 57.06988; 71.04914; 73.02841; 73.06479; 75.04406; 75.08044; 89.05971; 91.03897; 115.07536; 129.09101; 143.07027; 147.10157; 161.08084	30.48; 7.81; 23.50; 23.35; 59.02; 100.00; 26.79; 8.69; 22.19; 8.96; 48.64; 15.50; 35.37; 11.17; 19.95; 11.57; 7.16	41.03858; 43.01784; 43.05423; 44.99711; 45.03349; 53.03858; 55.05423; 57.06988; 69.03349; 71.04914; 73.02841; 73.06479	10.21; 8.44; 100.00; 9.89; 7.16; 10.84; 25.45; 60.69; 13.87; 52.33; 9.15; 15.33
444	133.12231	132.1150297	C7H16O2	CCCCOCC(C)O	21210	43.05423; 57.06988; 59.04914; 61.06479	47.78; 100.00; 69.58; 17.79	41.03858; 43.05423; 57.06988; 59.04914	37.90; 44.04; 100.00; 73.49	41.03858; 43.05423; 57.06988	100.00; 71.09; 95.76
445	178.98251	177.9752337	C7H5Cl2F	C1=CC(=C(C(=C1)Cl)CCl)F	108675	143.00583; 178.98251	8.56; 100.00	143.00583; 178.98251	33.03; 100.00	45.01350; 69.01350; 72.98395; 83.02915; 126.97453; 143.00583; 158.97628; 176.96686	10.45; 35.09; 7.71; 7.85; 63.28; 100.00; 26.49; 9.23
446	142.92577	141.91849	C2H4BrCl	C(CBr)Cl	7849	106.94909; 142.92577	100.00; 25.17	62.99960; 106.94909	39.72; 100.00	62.99960; 106.94909	25.69; 100.00
447	181.00264	179.9953623	C7H4ClF3	C1=CC(=CC=C1C(F)(F)F)Cl	7394	160.99641; 181.00264	2.02; 100.00	160.99641; 181.00264	7.47; 100.00	51.02293; 101.01973; 121.02596; 131.01031; 154.98699; 160.99641; 181.00264	14.13; 10.90; 35.45; 21.67; 29.20; 100.00; 83.97
448	93.04655	92.039278	C4H9Cl	CCCCCl	8005	57.06988; 93.04655	85.83; 100.00	41.03858; 57.06988; 93.04655	24.84; 100.00; 26.58	41.03858; 57.06988	100.00; 81.38
449	177.14045	176.1331784	C10H21Cl	CCCCCCCCCCCl	13848	43.05423; 55.05423; 57.06988; 59.08553; 71.08553; 79.03090; 85.10118; 87.11683; 91.03090; 93.04655; 105.04655; 177.14045	71.18; 28.59; 56.82; 12.57; 47.61; 10.69; 58.67; 14.23; 19.13; 52.88; 20.69; 100.00	41.03858; 43.05423; 55.05423; 57.06988; 69.06988; 71.08553; 85.10118	20.32; 58.91; 30.81; 83.56; 15.65; 100.00; 26.38	41.03858; 43.05423; 55.05423; 57.06988	64.09; 100.00; 38.64; 47.05
450	205.17175	204.1644785	C12H25Cl	CCCCCCCCCCCCCl	8192	43.05423; 55.05423; 57.06988; 59.08553; 71.08553; 79.03090; 85.10118; 87.11683; 91.03090; 93.04655; 105.04655; 107.06220; 113.13248; 119.06220; 121.07785; 135.09350; 205.17175	13.24; 10.11; 30.27; 7.36; 31.62; 11.20; 13.91; 7.15; 12.01; 7.45; 15.43; 7.43; 14.40; 8.09; 7.54; 8.87; 100.00	41.03858; 43.05423; 55.05423; 57.06988; 59.08553; 69.06988; 71.08553; 83.08553; 85.10118; 91.03090; 99.11683	7.25; 27.17; 17.87; 100.00; 10.01; 18.99; 49.38; 8.61; 21.90; 7.10; 10.41	41.03858; 43.05423; 55.05423; 57.06988	55.13; 100.00; 44.00; 80.35
451	163.0309	162.0236279	C10H7Cl	C1=CC=C2C(=C1)C=CC=C2Cl	7003	113.01525; 163.03090	0.43; 100.00	79.05423; 163.03090	13.29; 100.00	77.03858; 79.05423; 101.03858; 103.05423; 110.99960; 161.01525; 163.03090	100.00; 37.83; 44.51; 98.53; 51.88; 59.14; 71.90
452	163.1248	162.1175283	C9H19Cl	CCCCCCCCCCl	17185	43.05423; 55.05423; 57.06988; 71.08553; 73.10118; 79.03090; 85.10118; 91.03090; 93.04655; 105.04655; 163.12480	60.88; 22.68; 58.61; 80.62; 14.80; 14.75; 21.08; 39.96; 82.04; 14.95; 100.00	41.03858; 43.05423; 57.06988; 71.08553	50.72; 77.15; 96.56; 100.00	41.03858; 43.05423; 55.05423; 57.06988; 62.99960	98.21; 100.00; 43.57; 89.50; 45.66
453	149.10915	148.1018782	C8H17Cl	CCCCCCCCCl	8142	43.05423; 57.06988; 71.08553; 77.01525; 79.03090; 85.10118; 93.04655; 105.04655; 149.10915	25.34; 100.00; 18.75; 10.48; 29.87; 9.27; 12.54; 9.59; 59.70	41.03858; 43.05423; 57.06988; 71.08553	23.11; 45.71; 100.00; 15.86	41.03858; 43.05423; 55.05423; 57.06988	100.00; 86.69; 30.29; 81.39
454	135.05712	134.0498427	C6H11ClO	CC(C)(C)C(=O)CCl	83572	57.06988; 135.05712	100.00; 20.82	41.03858; 55.05423; 57.06988; 117.04655	18.28; 58.39; 100.00; 22.57	41.03858; 57.06988	22.15; 100.00
455	93.01017	92.0028925	C3H5ClO	CC(=O)CCl	6571	74.99960; 93.01017	15.21; 100.00	57.03349; 74.99960; 93.01017	29.19; 48.68; 100.00	39.02293; 43.01784; 57.03349	53.06; 100.00; 17.98
456	233.20305	232.1957786	C14H29Cl	CCCCCCCCCCCCCCCl	17043	43.05423; 55.05423; 57.06988; 71.08553; 83.08553; 85.10118; 93.04655; 99.11683; 105.04655; 119.06220; 135.09350; 147.09350; 149.10915; 233.20306	7.13; 5.65; 14.08; 16.06; 3.77; 9.69; 5.28; 4.26; 4.30; 6.96; 9.08; 5.39; 4.09; 100.00	41.03858; 43.05423; 55.05423; 57.06988; 59.08553; 69.06988; 71.08553; 73.10118; 83.08553; 85.10118; 99.11683; 105.04655; 129.16378; 233.20306	9.58; 32.46; 27.94; 71.37; 12.85; 25.44; 100.00; 10.19; 8.79; 40.81; 8.70; 9.45; 10.69; 23.23	41.03858; 43.05423; 55.05423; 57.06988; 71.08553	28.73; 100.00; 39.24; 88.24; 31.69
457	129.12739	128.1201151	C8H16O	CC(C1CCCCC1)O	137829	55.05423; 69.06988; 83.08553; 111.11683; 129.12739	16.73; 16.32; 43.17; 100.00; 14.27	41.03858; 55.05423; 57.06988; 69.06988; 81.06988; 83.08553; 95.08553; 111.11683	26.09; 64.41; 37.82; 62.56; 54.20; 54.08; 23.31; 100.00	41.03858; 43.05423; 55.05423; 81.06988; 83.08553; 95.08553; 111.11683	31.60; 33.52; 100.00; 77.36; 94.82; 81.79; 41.56
458	168.13829	167.1310142	C10H17NO	C1CCC(CC1)N2CCCC2=O	81278	86.06004; 168.13829	22.49; 100.00	41.03858; 42.03383; 55.05423; 56.04948; 81.06988; 83.08553; 84.04439; 86.06004; 150.12773; 168.13829	14.95; 49.65; 35.06; 16.10; 16.82; 100.00; 49.40; 99.96; 25.68; 48.35	41.03858; 43.05423; 44.01309; 53.03858; 55.05423; 56.04948; 57.06988; 79.05423; 81.06988; 83.08553; 84.08078; 96.08078; 98.09643; 112.11208; 122.09643; 126.09134; 138.12773; 140.10699	89.90; 8.95; 36.98; 21.47; 37.53; 30.25; 16.44; 18.00; 41.88; 100.00; 9.75; 16.60; 20.84; 20.62; 10.23; 18.20; 23.29; 23.52
459	158.19033	157.1830497	C10H23N	CCCCCCCCCCN	8916	43.05423; 55.05423; 57.06988; 60.08078; 71.08553; 72.08078; 74.09643; 85.10118; 86.09643; 87.11683; 88.11208; 100.11208; 158.19033	20.15; 7.74; 22.55; 10.31; 25.85; 13.72; 17.25; 20.83; 15.13; 9.68; 14.71; 7.47; 100.00	41.03858; 43.05423; 55.05423; 57.06988; 60.08078; 69.06988; 71.08553; 83.08553; 85.10118; 86.09643	19.47; 50.64; 31.09; 89.79; 13.90; 24.64; 100.00; 14.88; 19.16; 14.93	41.03858; 43.05423; 44.04948; 55.05423; 57.06988; 58.06513	68.27; 100.00; 52.73; 30.43; 61.94; 22.29
460	159.17434	158.1670653	C10H22O	CCCCCCCCCCO	8174	41.03858; 43.05423; 55.05423; 57.06988; 59.08553; 69.06988; 71.08553; 75.08044; 83.08553; 85.10118; 89.09609; 113.13248; 159.17434	13.93; 73.50; 36.77; 75.05; 11.50; 26.79; 100.00; 12.71; 17.66; 43.88; 16.14; 13.55; 46.90	41.03858; 43.05423; 55.05423; 57.06988; 69.06988; 71.08553	30.42; 92.44; 38.59; 100.00; 31.43; 81.15	41.03858; 43.05423; 45.03349; 57.06988	49.07; 100.00; 40.02; 35.89
461	141.16378	140.1565006	C10H20	CCCCCCCCC=C	13381	41.03858; 43.05423; 55.05423; 57.06988; 69.06988; 71.08553; 83.08553; 85.10118; 99.11683	20.61; 62.41; 69.50; 51.04; 68.08; 100.00; 32.46; 41.72; 21.39	41.03858; 43.05423; 55.05423; 57.06988; 69.06988; 71.08553	18.08; 25.62; 60.51; 25.82; 23.96; 100.00	39.02293; 41.03858; 43.05423; 55.05423; 57.06988; 69.06988; 71.08553	25.61; 59.10; 45.58; 100.00; 33.72; 35.00; 28.02
462	327.36214	326.3548661	C22H46O	CCCCCCCCCCCCCCCCCCCCCCO	12620	43.05423; 55.05423; 57.06988; 69.06988; 71.08553; 73.06479; 85.10118; 101.09609; 211.24203; 309.35158; 327.36214	4.11; 3.74; 8.00; 2.06; 5.43; 1.71; 3.17; 1.59; 2.04; 28.07; 100.00	41.03858; 43.05423; 55.05423; 57.06988; 59.04914; 59.08553; 61.06479; 69.06988; 71.08553; 73.10118; 75.08044; 83.08553; 85.10118; 97.10118; 99.11683; 101.13248; 111.11683; 127.14813; 139.14813; 197.22638; 211.24203; 239.27333; 241.25259; 253.28898; 267.30463; 269.28389; 309.35158; 327.36214	8.70; 39.84; 17.48; 64.11; 7.86; 9.30; 13.43; 11.99; 34.66; 6.73; 6.97; 8.99; 14.19; 5.18; 4.24; 4.24; 4.65; 5.68; 5.86; 7.11; 5.59; 4.49; 4.72; 5.17; 4.40; 4.91; 24.69; 100.00	41.03858; 43.05423; 45.03349; 55.05423; 57.06988; 69.06988; 71.08553; 83.08553; 85.10118	19.81; 85.88; 14.33; 33.34; 100.00; 12.42; 33.90; 8.49; 7.80
463	186.22163	185.2143499	C12H27N	CCCCCCCCCCCCN	13583	43.05423; 57.06988; 60.08078; 71.08553; 72.08078; 74.09643; 85.10118; 86.09643; 88.11208; 113.13248; 114.12773; 116.14338; 130.15903; 186.22163	7.47; 19.59; 11.00; 21.50; 11.89; 6.56; 11.85; 8.27; 8.99; 8.06; 5.39; 10.76; 6.10; 100.00	43.05423; 55.05423; 57.06988; 58.06513; 60.08078; 69.06988; 71.08553; 72.08078; 74.09643; 83.08553; 85.10118; 111.11683; 128.14338	18.84; 19.27; 100.00; 22.05; 31.58; 20.20; 59.79; 15.28; 14.22; 19.67; 16.39; 13.66; 10.33	41.03858; 43.05423; 44.04948; 55.05423; 57.06988; 58.06513; 72.08078	50.86; 100.00; 38.09; 51.72; 71.23; 59.95; 29.09
464	203.1828	202.175522	C12H26S	CCCCCCCCCCCCS	8195	43.05423; 55.05423; 57.06988; 71.08553; 75.02630; 77.04195; 85.10118; 89.04195; 91.05760; 103.05760; 105.07325; 113.13248; 117.07325; 119.08890; 203.18280	13.02; 9.02; 23.31; 33.40; 5.84; 6.17; 18.18; 8.01; 6.81; 8.76; 11.06; 6.69; 6.21; 13.74; 100.00	41.03858; 43.05423; 55.05423; 57.06988; 69.06988; 71.08553; 75.02630; 77.04195; 83.08553; 85.10118; 97.10118	11.15; 32.11; 25.65; 100.00; 24.19; 74.57; 17.25; 18.57; 24.42; 22.06; 13.87	41.03858; 43.05423; 46.99500; 55.05423; 57.06988; 71.08553	45.94; 100.00; 20.59; 37.13; 55.76; 21.93
465	187.20564	186.1983654	C12H26O	CCCCCCCCCCCCO	8193	41.03858; 43.05423; 55.05423; 57.06988; 61.06479; 69.06988; 71.08553; 83.08553; 85.10118; 99.11683; 113.13248; 117.12739; 169.19508; 187.20564	17.86; 56.57; 47.50; 92.09; 17.83; 33.07; 100.00; 23.96; 69.79; 35.53; 20.94; 20.42; 16.50; 84.80	41.03858; 43.05423; 55.05423; 57.06988; 69.06988; 71.08553; 85.10118	14.08; 44.53; 22.31; 100.00; 21.58; 48.93; 18.37	41.03858; 43.05423; 55.05423; 57.06988	46.03; 100.00; 37.73; 59.78
466	169.19508	168.1878008	C12H24	CCCCCCCCCCC=C	8183	43.05423; 55.05423; 57.06988; 59.08553; 69.06988; 71.08553; 83.08553; 85.10118; 87.11683; 97.10118; 99.11683; 101.13248	71.21; 80.79; 88.55; 29.06; 70.02; 60.74; 55.40; 100.00; 28.93; 39.38; 49.55; 45.27	41.03858; 43.05423; 55.05423; 57.06988; 59.08553; 69.06988; 71.08553; 85.10118	32.41; 100.00; 90.21; 90.38; 65.46; 90.30; 58.89; 61.47	39.02293; 41.03858; 43.05423; 55.05423; 57.06988; 69.06988	17.42; 72.40; 27.16; 100.00; 29.25; 16.37
467	254.24784	253.2405646	C16H31NO	CCCCCCCCCCCCN1CCCC1=O	62459	57.06988; 84.04439; 86.06004; 98.06004; 114.09134; 128.10699; 254.24784	3.38; 2.71; 11.57; 2.98; 3.12; 2.54; 100.00	41.03858; 43.05423; 55.05423; 57.06988; 58.06513; 69.06988; 71.08553; 81.06988; 84.04439; 86.06004; 95.08553; 98.06004; 100.07569; 112.07569; 114.09134; 125.13248; 126.09134; 127.14813; 128.10699; 184.20598; 186.22163; 198.22163; 212.20089; 226.25293; 236.23728; 254.24784	16.75; 19.96; 12.85; 33.27; 6.33; 8.35; 14.44; 5.38; 13.31; 17.24; 8.27; 34.27; 20.09; 10.05; 11.30; 5.42; 24.18; 6.91; 15.81; 7.68; 6.35; 10.47; 4.91; 11.48; 9.37; 100.00	41.03858; 43.05423; 44.04948; 55.05423; 56.04948; 57.06988; 58.06513; 69.03349; 69.06988; 70.06513; 71.04914; 71.08553; 81.06988; 84.04439; 86.06004; 95.08553; 96.08078; 98.06004; 98.09643; 100.07569; 109.10118; 112.07569; 126.09134; 140.10699; 154.12264; 212.20089	100.00; 82.76; 6.36; 42.30; 10.35; 53.32; 8.55; 16.17; 8.02; 5.85; 6.15; 10.22; 16.50; 6.27; 10.19; 24.59; 8.12; 18.89; 6.44; 8.36; 5.70; 14.75; 10.79; 7.48; 6.36; 14.29
468	105.09101	104.0837296	C5H12O2	CCOCC(C)O	15287	41.03858; 43.05423; 59.04914; 87.08044	100.00; 86.00; 64.12; 53.80	41.03858; 59.04914	100.00; 63.53	41.03858; 45.03349; 59.04914	50.84; 100.00; 47.37
469	118.0611	117.0538265	C3H7N3O2	CCN(C(=O)N)N=O	12967	44.01309; 75.05529; 118.06110	62.43; 100.00; 31.36	44.01309; 44.04948; 45.00834; 57.04472; 73.03964; 75.05529; 90.02980	48.08; 16.14; 13.99; 100.00; 14.78; 68.41; 24.08	44.01309; 44.04948; 45.00834; 57.04472; 72.01924; 73.00325	86.37; 17.71; 16.50; 17.54; 23.98; 100.00
470	114.09134	113.084064	C6H11NO	CCN1CCCC1=O	17595	41.03858; 56.04948; 58.06513; 72.04439; 84.08078; 86.06004; 96.08078; 114.09134	5.30; 5.10; 4.48; 4.72; 4.96; 8.56; 5.00; 100.00	44.04948; 58.06513; 70.06513; 86.09643; 96.08078; 98.06004; 114.09134	45.58; 58.69; 13.20; 29.44; 33.23; 30.05; 100.00	39.02293; 41.03858; 42.03383; 43.05423; 44.01309; 44.04948; 54.03383; 56.04948; 58.06513; 69.03349; 70.06513; 72.04439	11.82; 65.20; 26.21; 12.99; 11.87; 100.00; 24.37; 71.61; 26.99; 10.61; 17.37; 9.85
471	129.13862	128.1313485	C7H16N2	CCN1CCCC1CN	117295	112.11208; 129.13862	100.00; 14.76	58.06513; 86.09643; 96.08078; 112.11208; 129.13862	7.61; 6.90; 26.71; 100.00; 7.72	42.03383; 44.04948; 56.04948; 58.06513; 67.05423; 70.06513; 72.08078; 84.08078; 96.08078; 98.09643; 112.11208	65.96; 100.00; 99.89; 71.05; 24.38; 33.39; 27.81; 51.06; 53.53; 44.90; 67.71
472	125.09609	124.088815	C8H12O	C#CC1(CCCCC1)O	6525	65.03858; 67.05423; 79.05423; 81.06988; 83.04914; 85.06479; 95.04914; 99.08044; 107.08553; 125.09609	41.23; 29.38; 22.16; 23.51; 36.73; 25.08; 15.82; 15.92; 100.00; 60.27	51.02293; 55.05423; 57.06988; 65.03858; 77.03858; 79.05423; 81.06988; 91.05423; 107.08553	29.12; 42.36; 29.26; 19.95; 40.77; 69.73; 47.32; 27.32; 100.00	55.05423; 65.03858; 77.03858; 79.05423; 81.06988; 91.05423; 107.08553	17.64; 31.51; 45.75; 100.00; 44.49; 33.51; 39.74
473	148.07569	147.0684139	C9H9NO	C1=CN(C=C1)CC2=CC=CO2	15037	39.02293; 81.03349; 148.07569	33.12; 49.55; 100.00	39.02293; 80.04948; 81.03349; 92.04948; 148.07569	9.46; 41.56; 33.28; 12.13; 100.00	39.02293; 51.02293; 53.03858; 63.02293; 80.04948; 81.03349; 90.03383; 92.04948; 96.04439; 104.04948; 128.04948	40.32; 19.20; 100.00; 9.91; 82.82; 21.25; 9.61; 39.94; 17.52; 9.04; 13.78
474	374.92868	373.9214	C6H4F9I	C(CI)C(C(C(C(F)(F)F)(F)F)(F)F)(F)F	74887	354.92245; 374.92868	0.22; 100.00	354.92245; 374.92868	4.10; 100.00	184.92580; 204.93203; 234.92261; 247.01638; 254.92884; 354.92245; 374.92868	13.25; 24.54; 9.91; 17.36; 29.73; 71.83; 100.00
475	474.92229	473.91501	C8H4F13I	C(CI)C(C(C(C(C(C(F)(F)F)(F)F)(F)F)(F)F)(F)F)(F)F	74888	454.91606; 474.92229	0.33; 100.00	454.91606; 474.92229	5.19; 100.00	101.00089; 204.93203; 304.92564; 318.97869; 347.00999; 354.92245; 404.91926; 454.91606; 474.92229	7.21; 8.56; 13.54; 6.74; 17.91; 7.36; 7.04; 86.85; 100.00
476	218.99241	217.9851378	C10H2O6	C1=C2C(=CC3=C1C(=O)OC3=O)C(=O)OC2=O	6966	175.00258; 218.99241	0.30; 100.00	175.00258; 218.99241	9.81; 100.00	175.00258; 218.99241	100.00; 13.12
477	199.03897	198.031694	C12H6O3	C1=CC2=C3C(=C1)C(=O)OC(=O)C3=CC=C2	6693	155.04914; 199.03897	5.11; 100.00	155.04914; 199.03897	64.54; 100.00	101.03858; 155.04914	24.75; 100.00
478	70.03997	69.03269711	C2H3N3	C1=NC=NN1	9257	43.02907; 70.03997	20.05; 100.00	43.02907; 70.03997	6.90; 100.00	43.02907; 70.03997	10.98; 100.00
479	198.05495	197.0476785	C12H7NO2	C1=CC2=C3C(=C1)C(=O)NC(=O)C3=CC=C2	66491	155.04914; 198.05495	1.09; 100.00	155.04914; 198.05495	21.78; 100.00	101.03858; 155.04914	25.58; 100.00
480	117.12739	116.1201151	C7H16O	CCCCCCCO	8129	43.05423; 55.05423; 57.06988; 69.06988; 71.08553; 85.10118; 99.11683	73.64; 30.92; 100.00; 17.93; 28.84; 21.80; 25.53	41.03858; 43.05423; 57.06988; 71.08553	52.31; 100.00; 69.68; 45.60	41.03858; 43.05423; 57.06988	66.51; 100.00; 36.22
481	243.26824	242.2609657	C16H34O	CCCCCCCCCCCCCCCCO	2682	43.05423; 55.05423; 57.06988; 69.06988; 71.08553; 83.08553; 85.10118; 97.10118; 99.11683; 113.13248; 117.12739; 127.14813; 129.16378; 225.25768; 243.26824	5.12; 5.47; 11.80; 5.03; 11.17; 4.61; 8.82; 3.72; 5.38; 6.36; 5.62; 5.99; 3.99; 23.55; 100.00	43.05423; 55.05423; 57.06988; 59.08553; 61.06479; 69.06988; 71.08553; 83.08553; 85.10118; 97.10118; 99.11683; 113.13248; 115.11174; 115.14813; 117.12739; 127.14813; 225.25768; 243.26824	45.70; 26.29; 100.00; 17.29; 15.39; 37.21; 75.45; 25.62; 27.93; 16.03; 19.90; 18.17; 11.03; 13.07; 12.36; 14.70; 9.30; 48.77	41.03858; 43.05423; 45.03349; 55.05423; 57.06988; 71.08553	25.88; 100.00; 18.04; 42.06; 94.22; 33.67
482	225.25768	224.250401	C16H32	CCCCCCCCCCCCCCC=C	12395	43.05423; 55.05423; 57.06988; 69.06988; 71.08553; 83.08553; 85.10118; 97.10118; 99.11683; 111.11683; 113.13248; 127.14813; 129.16378; 141.16378; 225.25768	9.07; 23.29; 21.31; 21.32; 15.35; 21.20; 19.01; 39.26; 8.65; 9.15; 8.88; 9.24; 32.89; 16.10; 100.00	41.03858; 43.05423; 55.05423; 57.06988; 67.05423; 69.06988; 71.08553; 81.06988; 83.08553; 85.10118; 97.10118; 225.25768	19.10; 25.32; 100.00; 61.53; 14.15; 78.18; 52.28; 51.34; 32.11; 21.88; 61.28; 25.65	41.03858; 43.05423; 55.05423; 57.06988; 69.06988; 81.06988	67.91; 36.47; 100.00; 25.07; 38.46; 18.40
483	103.11174	102.1044651	C6H14O	CCCCCCO	8103	43.05423; 57.06988; 71.08553; 85.10118	100.00; 61.39; 36.07; 33.54	43.05423; 55.05423; 57.06988	100.00; 61.80; 99.90	41.03858; 43.05423; 57.06988	100.00; 77.66; 50.79
484	85.10118	84.09390038	C6H12	CCCCC=C	11597	43.05423; 55.05423; 85.10118	100.00; 43.81; 39.71	43.05423; 69.06988	56.99; 100.00	41.03858; 43.05423; 55.05423; 57.06988; 81.06988	77.18; 95.58; 49.20; 100.00; 40.41
485	117.06988	116.0626003	C9H8	C1C=CC2=CC=CC=C21	7219	91.05423; 117.06988	2.13; 100.00	91.05423; 117.06988	27.05; 100.00	77.03858; 89.03858; 101.03858; 115.05423	28.24; 84.26; 35.67; 100.00
486	129.0407	128.0334254	C3H4N4O2	C1=NN=NN1CC(=O)O	543207	83.03522; 129.04070	11.05; 100.00	55.02907; 56.02432; 83.03522; 129.04070	44.90; 25.58; 100.00; 14.38	55.02907; 56.02432; 58.03997; 83.03522	27.10; 100.00; 69.41; 27.37
487	136.05054	135.0432618	C6H5N3O	C1=CC=C2C(=C1)N=NN2O	75771	108.04439; 136.05054	18.11; 100.00	108.04439; 136.05054	80.13; 100.00	51.02293; 53.03858; 63.02293; 65.03858; 105.04472	45.14; 19.48; 100.00; 22.57; 48.44
488	219.08044	218.0731649	C16H10O	C1=CC2=C3C(=C1)C=CC4=C(C=CC(=C43)C=C2)O	21387	191.08553; 1.3991e-05; 219.08044	0.08; 8.2065e-06; 100.00	191.08553; 219.08044	1.94; 100.00	189.06988; 191.08553	100.00; 20.25
489	413.34141	412.3341306	C28H44O2	CC(C)C(C)C=CC(C)C1CCC2C1(CCCC2=CC=C3CC(CC(C3=C)O)O)C	4479094	43.05423; 71.08553; 83.08553; 123.08044; 133.06479; 151.07536; 263.27333; 267.17434; 269.18999; 271.20564; 285.18491; 285.25768; 287.20056; 289.28898; 297.22129; 299.23694; 311.23694; 315.23186; 329.24751; 331.26316; 339.30463; 341.32028; 353.28389; 369.27881; 369.31519; 371.33084; 377.32028; 383.33084; 395.33084; 397.31011; 413.34141	10.01; 10.59; 35.19; 11.93; 24.87; 21.40; 18.78; 91.16; 100.00; 30.50; 25.98; 9.05; 32.64; 9.52; 21.03; 10.44; 19.19; 33.17; 34.86; 32.59; 28.53; 13.30; 21.13; 9.90; 22.14; 10.16; 20.50; 14.66; 48.59; 13.29; 94.19	43.05423; 55.05423; 69.06988; 71.08553; 81.06988; 83.08553; 85.10118; 91.05423; 95.08553; 111.11683; 113.13248; 123.08044; 135.11683; 139.07536; 147.11683; 267.17434; 269.18999; 271.20564; 285.18491; 287.20056; 325.28898; 337.28898; 339.30463; 365.32028; 367.29954; 369.31519; 371.33084; 377.32028; 385.34649; 395.33084; 413.34141	13.38; 52.23; 40.01; 49.16; 32.53; 36.00; 19.02; 16.29; 18.61; 44.50; 22.15; 10.04; 12.74; 11.14; 11.10; 100.00; 47.08; 14.97; 31.07; 27.57; 32.19; 18.90; 39.64; 11.57; 17.84; 39.00; 10.54; 32.05; 11.24; 14.17; 15.93	41.03858; 43.05423; 53.03858; 55.05423; 69.06988; 71.08553; 79.05423; 81.06988; 83.08553; 91.05423; 93.06988; 95.08553; 109.10118; 111.11683; 113.13248; 119.08553; 135.08044; 159.11683; 161.13248; 163.14813; 225.12739; 227.14304; 267.17434; 269.18999; 271.20564; 287.20056; 289.21621; 339.30463; 365.28389; 385.31011; 395.33084	13.07; 25.76; 7.09; 19.22; 15.11; 20.59; 21.26; 100.00; 30.23; 10.68; 14.66; 16.74; 14.66; 27.03; 14.43; 10.60; 6.88; 9.24; 10.50; 8.91; 13.24; 6.94; 15.59; 10.24; 23.51; 9.72; 7.97; 7.31; 6.76; 8.02; 10.58
490	297.10737	296.1001	C12H25I	CCCCCCCCCCCCI	20282	43.05423; 55.05423; 57.06988; 59.08553; 71.08553; 85.10118; 113.13248; 170.96652; 182.96652; 184.98217; 196.98217; 198.99782; 210.99782; 213.01347; 227.02912; 297.10738	12.37; 10.21; 30.88; 7.35; 31.48; 14.30; 14.40; 12.09; 12.25; 7.27; 15.99; 7.63; 8.33; 7.36; 9.11; 100.00	41.03858; 43.05423; 55.05423; 57.06988; 59.08553; 69.06988; 71.08553; 83.08553; 85.10118; 99.11683; 182.96652	7.24; 27.06; 18.11; 100.00; 9.99; 18.44; 50.50; 8.69; 20.42; 9.77; 8.60	41.03858; 43.05423; 55.05423; 57.06988	50.73; 100.00; 43.76; 80.92
491	353.16998	352.1627	C16H33I	CCCCCCCCCCCCCCCCI	11007	43.05423; 55.05423; 57.06988; 71.08553; 85.10118; 113.13248; 210.99782; 227.02912; 353.16998	3.43; 1.97; 8.16; 5.94; 3.06; 2.30; 2.68; 4.45; 100.00	43.05423; 55.05423; 57.06988; 59.08553; 69.06988; 71.08553; 85.10118; 97.10118; 99.11683; 101.13248; 113.13248; 115.14813; 225.01347; 227.02912; 241.04477; 353.16998	40.88; 19.36; 100.00; 22.51; 22.80; 73.35; 25.07; 14.01; 19.24; 15.49; 15.08; 17.66; 22.81; 23.72; 13.84; 78.30	41.03858; 43.05423; 55.05423; 57.06988; 69.06988; 71.08553; 83.08553	21.73; 97.86; 34.03; 100.00; 11.75; 34.06; 12.60
492	213.01347	212.0062	C6H13I	CCCCCCI	12527	43.05423; 55.05423; 57.06988; 59.08553; 85.10118; 213.01347	27.49; 8.55; 38.92; 13.14; 27.47; 100.00	41.03858; 43.05423; 55.05423; 57.06988; 71.08553	54.65; 100.00; 60.03; 86.89; 40.15	41.03858; 43.05423; 55.05423; 57.06988; 154.93522	52.29; 100.00; 27.59; 23.76; 28.32
493	255.06042	254.05315	C9H19I	CCCCCCCCCI	20275	43.05423; 55.05423; 57.06988; 71.08553; 85.10118; 170.96652; 182.96652; 184.98217; 196.98217; 255.06043	58.29; 21.37; 61.03; 77.65; 18.94; 15.99; 40.20; 77.93; 15.08; 100.00	41.03858; 43.05423; 57.06988; 71.08553	50.65; 76.21; 95.01; 100.00	41.03858; 43.05423; 55.05423; 57.06988; 154.93522	86.34; 100.00; 46.91; 91.67; 46.64
494	91.07536	90.06807956	C4H10O2	CC(COC)O	7900	41.03858; 73.06479	100.00; 52.07	41.03858; 43.05423; 45.03349	100.00; 59.75; 35.47	41.03858; 45.03349	22.73; 100.00
495	133.08592	132.0786442	C6H12O3	CC(COC)OC(=O)C	7946	41.03858; 43.01784; 43.05423; 73.06479; 101.05971	100.00; 18.16; 20.57; 52.71; 8.70	41.03858; 43.01784; 43.05423; 73.06479	100.00; 37.32; 57.62; 35.24	41.03858; 43.01784; 45.03349	84.01; 100.00; 66.30
496	90.09134	89.08406397	C4H11NO	CC(COC)N	123458	58.06513; 90.09134	100.00; 24.01	41.03858; 43.05423; 58.06513; 60.08078	65.96; 49.98; 100.00; 52.59	44.04948; 45.03349	100.00; 80.57
497	123.08044	122.0731649	C8H10O	CC1=CC=C(C=C1)OC	7731	79.05423; 91.05423; 123.08044	7.87; 11.74; 100.00	51.02293; 53.03858; 65.03858; 67.05423; 79.05423; 91.05423; 93.06988; 95.04914; 95.08553; 97.06479; 123.08044	18.76; 23.42; 43.56; 21.91; 34.05; 84.10; 30.62; 19.98; 29.48; 19.40; 100.00	51.02293; 53.03858; 63.02293; 65.03858; 77.03858; 79.05423; 91.05423	52.69; 78.18; 21.02; 45.50; 83.98; 58.92; 100.00
498	185.18999	184.1827154	C12H24O	CCC(C)(C)C1CCC(CC1)OC	3420996	41.03858; 43.05423; 55.05423; 71.08553; 83.08553; 113.09609; 115.11174; 125.13248; 153.16378; 185.18999	16.92; 32.99; 11.72; 100.00; 19.10; 11.47; 75.16; 11.81; 18.60; 56.50	41.03858; 43.05423; 55.05423; 69.06988; 71.08553; 83.08553	94.67; 49.18; 100.00; 11.73; 94.27; 19.40	41.03858; 43.05423; 55.05423; 57.06988; 69.06988; 71.08553; 81.06988	100.00; 88.25; 74.66; 34.09; 28.32; 29.68; 22.00
499	185.09609	184.088815	C13H12O	CC1=CC(=CC=C1)OC2=CC=CC=C2	19165	91.05423; 185.09609	3.51; 100.00	91.05423; 145.06479; 185.09609	14.03; 4.84; 100.00	41.03858; 51.02293; 63.02293; 65.03858; 75.02293; 79.05423; 91.05423; 93.06988; 131.04914; 133.06479; 135.08044; 145.06479; 155.04914; 183.08044	14.21; 18.71; 20.68; 100.00; 18.11; 31.50; 94.42; 27.93; 16.50; 30.99; 13.62; 17.58; 13.92; 24.66
500	330.11002	329.1027486	C19H14F3NO	CN1C=C(C(=O)C(=C1)C2=CC(=CC=C2)C(F)(F)F)C3=CC=CC=C3	43079	289.08348; 330.11003	1.25; 100.00	310.10380; 330.11003	6.09; 100.00	101.03858; 103.05423; 132.08078; 159.04161; 169.02596; 171.04161; 182.09643; 184.07569; 208.07569; 208.11208; 210.09134; 232.07569; 234.09134; 236.10699; 260.10699; 301.08348; 304.09438; 310.10380; 314.07873; 328.09438; 330.11003	15.81; 50.61; 20.63; 13.38; 17.01; 62.46; 20.43; 27.85; 44.76; 12.51; 45.26; 36.95; 14.85; 21.78; 100.00; 17.21; 22.90; 47.21; 23.10; 18.46; 12.86
501	166.07234	165.0650599	C6H7N5O	CN1C(=O)C2=C(N=CN2)N=C1N	70315	138.07742; 166.07234	0.45; 100.00	82.03997; 110.03489; 164.05669; 166.07234	10.34; 8.26; 16.00; 100.00	53.01342; 55.02907; 65.01342; 67.02907; 68.02432; 80.02432; 82.03997; 84.05562; 92.02432; 94.03997; 95.02399; 97.03964; 107.03522; 108.01924; 109.05087; 110.03489; 111.06652; 139.06144; 0.015059; 149.04579; 164.05669	21.63; 77.76; 44.20; 28.15; 29.08; 67.20; 100.00; 26.35; 15.92; 38.41; 24.46; 18.07; 25.03; 20.05; 48.21; 19.29; 34.90; 19.11; 0.014836; 13.05; 31.97
502	143.08553	142.0782503	C11H10	CC1=CC=CC2=CC=CC=C12	7002	117.06988; 143.08553	2.37; 100.00	91.05423; 115.05423; 143.08553	35.16; 37.82; 100.00	77.03858; 89.03858; 91.05423; 115.05423; 117.06988; 127.05423; 141.06988	30.10; 37.95; 100.00; 38.17; 42.80; 30.33; 28.25
503	217.10118	216.0939004	C17H12	CC1=C2C=CC3=CC=CC4=C3C2=C(C=C1)C=C4	16932	215.08553; 217.10118	0.10; 100.00	189.06988; 217.10118	1.96; 100.00	189.06988; 215.08553; 217.10118	57.42; 74.58; 100.00
504	227.12779	226.1205091	C12H18O4	CC(CCOC(=O)C(=C)C)OC(=O)C(=C)C	70916	55.05423; 69.03349; 71.04914; 87.04406; 101.05971; 123.08044; 141.09101; 227.12779	60.94; 36.85; 18.43; 84.96; 16.10; 24.74; 100.00; 15.92	41.03858; 43.05423; 55.05423; 69.03349; 71.04914; 87.04406; 99.04406; 113.05971; 139.07536; 141.09101	32.29; 10.81; 28.25; 100.00; 29.06; 63.01; 19.38; 18.37; 11.53; 10.14	41.03858; 43.05423; 55.05423; 69.03349; 71.04914; 87.04406	100.00; 9.62; 13.92; 40.25; 32.53; 27.85
505	275.22169	274.2144094	C15H30O4	CCCCCCCCCCCC(=O)OCC(CO)O	14871	43.05423; 57.06988; 71.08553; 75.04406; 83.08553; 85.10118; 95.08553; 97.10118; 109.10118; 111.11683; 123.11683; 137.13248; 139.14813; 141.16378; 151.14813; 165.16378; 183.17434; 187.13287; 201.18491; 239.20056; 257.21112; 275.22169	7.64; 10.19; 12.11; 9.31; 4.41; 5.56; 6.33; 5.82; 13.23; 4.06; 9.51; 15.59; 3.90; 4.18; 5.15; 5.68; 53.12; 4.64; 6.81; 6.44; 69.69; 100.00	43.05423; 55.05423; 57.03349; 57.06988; 69.06988; 71.08553; 75.04406; 81.06988; 83.08553; 85.10118; 93.05462; 95.08553; 97.10118; 99.11683; 109.10118; 111.11683; 119.07027; 123.11683; 127.14813; 129.05462; 133.08592; 137.13248; 139.14813; 141.16378; 165.16378; 181.15869; 183.17434; 201.18491; 239.20056; 257.21112; 275.22169	41.17; 14.06; 25.54; 63.15; 22.85; 47.08; 100.00; 10.23; 38.05; 25.37; 20.70; 31.69; 24.05; 11.44; 37.24; 18.60; 10.62; 30.26; 16.48; 12.00; 11.08; 35.43; 31.33; 11.26; 10.29; 9.74; 51.11; 10.68; 19.77; 68.40; 35.69	41.03858; 43.05423; 45.03349; 55.05423; 57.06988; 61.02841; 69.06988; 71.08553; 75.04406; 81.06988; 83.08553; 85.10118; 95.08553	35.62; 84.60; 12.20; 37.85; 100.00; 16.46; 22.07; 30.28; 13.36; 14.36; 9.05; 9.21; 19.09
506	186.09134	185.084064	C12H11NO	C1=CC=C2C(=C1)C=CC=C2CC(=O)N	6861	141.06988; 186.09134	68.91; 100.00	91.05423; 141.06988; 143.08553; 169.06479; 186.09134	10.16; 100.00; 10.85; 16.32; 56.53	77.03858; 89.03858; 91.05423; 101.03858; 115.05423; 141.06988; 151.05423	17.47; 11.32; 39.38; 10.50; 35.99; 100.00; 18.15
507	187.07536	186.0680796	C12H10O2	C1=CC=C2C(=C1)C=CC=C2CC(=O)O	6862	141.06988; 187.07536	100.00; 97.96	91.05423; 141.06988; 187.07536	12.21; 100.00; 12.87	77.03858; 89.03858; 91.05423; 101.03858; 115.05423; 141.06988	22.02; 18.09; 57.95; 12.44; 49.71; 100.00
508	145.06479	144.0575149	C10H8O	C1=CC=C2C(=C1)C=CC=C2O	7005	117.06988; 145.06479	0.73; 100.00	115.05423; 145.06479	72.20; 100.00	75.02293; 77.03858; 89.03858; 91.05423; 115.05423	16.36; 28.92; 27.71; 31.23; 100.00
509	144.08078	143.0734993	C10H9N	C1=CC=C2C(=C1)C=CC=C2N	8640	115.05423; 144.08078	0.97; 100.00	115.05423; 144.08078	52.61; 100.00	75.02293; 77.03858; 89.03858; 91.05423; 115.05423	16.06; 16.21; 40.79; 56.51; 100.00
510	145.15869	144.1514153	C9H20O	CCCCCCCCCO	8914	41.03858; 43.05423; 55.05423; 57.06988; 69.06988; 71.08553; 83.08553; 85.10118; 99.11683; 127.14813; 145.15869	16.58; 67.12; 47.79; 100.00; 31.01; 89.46; 24.12; 45.71; 17.59; 30.72; 36.15	41.03858; 43.05423; 55.05423; 57.06988; 71.08553	23.70; 49.03; 21.62; 100.00; 36.67	41.03858; 43.05423; 55.05423; 57.06988	100.00; 95.01; 51.12; 93.10
511	271.29954	270.2922658	C18H38O	CCCCCCCCCCCCCCCCCCO	8221	43.05423; 55.05423; 57.06988; 69.06988; 71.08553; 73.06479; 85.10118; 125.13248; 127.14813; 155.17943; 253.28898; 271.29954	4.16; 3.68; 8.03; 2.18; 6.91; 1.79; 3.54; 2.69; 2.61; 1.94; 25.90; 100.00	41.03858; 43.05423; 55.05423; 57.06988; 59.04914; 59.08553; 61.06479; 69.06988; 71.08553; 73.10118; 75.08044; 83.08553; 85.10118; 97.10118; 111.11683; 127.14813; 129.12739; 129.16378; 141.16378; 253.28898; 271.29954	10.23; 47.41; 21.82; 76.59; 8.86; 13.35; 16.09; 19.13; 64.47; 10.33; 7.55; 19.61; 19.06; 12.49; 10.41; 19.00; 9.29; 6.76; 18.70; 20.02; 100.00	41.03858; 43.05423; 45.03349; 55.05423; 57.06988; 69.06988; 71.08553	24.14; 100.00; 17.47; 36.31; 98.41; 14.29; 48.13
512	253.28898	252.2817011	C18H36	CCCCCCCCCCCCCCCCC=C	8217	43.05423; 55.05423; 57.06988; 69.06988; 71.08553; 83.08553; 97.10118; 111.11683; 125.13248; 139.14813; 141.16378; 155.17943; 169.19508; 181.19508; 253.28898	3.61; 9.63; 5.78; 9.08; 4.29; 6.44; 15.45; 5.32; 4.74; 3.11; 4.59; 5.95; 4.83; 3.37; 100.00	41.03858; 43.05423; 55.05423; 57.06988; 59.08553; 69.06988; 71.08553; 81.06988; 83.08553; 85.10118; 97.10118; 111.11683; 125.13248; 127.14813; 129.16378; 253.28898	21.36; 22.53; 96.53; 100.00; 20.26; 78.53; 62.00; 15.62; 22.05; 23.78; 56.14; 15.04; 21.70; 17.72; 32.86; 65.86	41.03858; 43.05423; 55.05423; 57.06988; 67.05423; 69.06988; 81.06988	63.10; 36.22; 100.00; 36.65; 12.27; 38.66; 18.98
513	130.15903	129.1517496	C8H19N	CCCCCCCCN	8143	43.05423; 57.06988; 58.06513; 60.08078; 71.08553; 72.08078; 86.09643; 113.13248; 130.15903	15.79; 51.91; 12.39; 29.19; 26.13; 16.21; 10.71; 18.27; 100.00	41.03858; 43.05423; 55.05423; 57.06988; 60.08078; 71.08553	63.28; 100.00; 54.38; 99.66; 51.38; 95.42	41.03858; 43.05423; 44.04948; 57.06988; 58.06513	90.69; 100.00; 35.56; 75.42; 49.38
514	213.07105	212.0637786	C8H17ClO2S	CCCCCCCCS(=O)(=O)Cl	82261	55.05423; 57.06988; 69.06988; 71.08553; 81.06988; 83.08553; 85.10118; 109.10118; 113.13248; 195.06049; 213.07105	16.73; 12.89; 16.24; 19.86; 8.45; 5.99; 6.65; 6.28; 27.30; 6.09; 100.00	41.03858; 43.05423; 53.03858; 55.05423; 57.06988; 65.03858; 67.05423; 69.06988; 71.08553; 79.05423; 81.06988; 95.08553; 142.99280	21.50; 26.47; 12.80; 100.00; 70.90; 13.49; 14.36; 82.80; 19.65; 18.38; 22.54; 26.44; 11.58	41.03858; 43.05423; 55.05423; 57.06988; 67.05423; 69.06988; 79.05423; 81.06988; 93.06988; 95.08553; 100.94585; 107.08553	15.95; 33.86; 100.00; 52.15; 45.79; 56.32; 36.47; 34.90; 56.25; 36.19; 34.72; 22.12
515	147.1202	146.1129218	C8H18S	CCCCCCCCS	8144	43.05423; 55.05423; 57.06988; 71.08553; 75.02630; 77.04195; 85.10118; 103.05760; 113.13248; 147.12020	46.00; 22.29; 76.17; 50.96; 31.63; 53.07; 31.55; 16.29; 44.25; 100.00	41.03858; 43.05423; 55.05423; 57.06988; 71.08553; 77.04195	47.06; 88.22; 53.69; 86.20; 100.00; 39.97	41.03858; 43.05423; 46.99500; 57.06988; 75.02630	100.00; 99.43; 42.03; 67.11; 33.81
516	131.14304	130.1357652	C8H18O	CCCCCCCCO	957	43.05423; 55.05423; 57.06988; 61.06479; 71.08553; 85.10118; 113.13248; 131.14304	100.00; 28.51; 83.13; 38.81; 44.03; 25.03; 19.08; 22.98	41.03858; 43.05423; 57.06988; 71.08553	26.36; 100.00; 87.02; 25.43	41.03858; 43.05423; 57.06988	88.68; 100.00; 63.97
517	129.12739	128.1201151	C8H16O	CCCCCC(C=C)O	18827	43.05423; 55.05423; 57.06988; 69.06988; 71.08553; 73.06479; 81.06988; 83.08553; 101.09609; 111.11683	25.50; 100.00; 66.79; 18.26; 62.64; 37.15; 30.82; 66.60; 39.76; 21.55	41.03858; 43.05423; 55.05423; 57.06988; 69.06988; 71.08553	33.01; 40.00; 100.00; 63.53; 29.71; 98.01	39.02293; 41.03858; 43.05423; 55.05423; 57.06988; 69.06988; 71.08553; 81.06988	25.27; 78.14; 100.00; 55.37; 54.05; 23.21; 45.30; 19.95
518	127.11174	126.1044651	C8H14O	CCCCCC(=O)C=C	61346	41.03858; 43.05423; 55.05423; 57.06988; 69.06988; 71.08553; 81.06988; 83.04914; 85.06479; 97.06479; 99.08044; 127.11174	19.66; 50.75; 59.46; 77.85; 29.43; 100.00; 18.40; 16.35; 18.84; 13.44; 67.60; 31.36	41.03858; 43.05423; 53.03858; 55.01784; 55.05423; 57.03349; 57.06988; 65.03858; 67.05423; 69.03349; 69.06988; 71.08553; 79.05423; 81.06988; 83.08553	82.01; 59.88; 27.78; 20.01; 93.74; 34.14; 47.10; 19.46; 21.95; 39.16; 45.92; 100.00; 31.65; 23.78; 24.19	39.02293; 41.03858; 43.05423; 51.02293; 55.01784; 55.05423; 57.06988; 65.03858; 67.05423; 69.06988; 79.05423; 81.06988	48.71; 74.72; 100.00; 22.35; 39.51; 38.29; 47.24; 29.13; 39.84; 69.28; 26.68; 36.64
519	113.13248	112.1252005	C8H16	CCCCCCC=C	8125	43.05423; 55.05423; 57.06988; 59.08553; 71.08553; 83.08553	43.94; 56.54; 100.00; 32.88; 65.23; 44.42	41.03858; 43.05423; 55.05423; 57.06988; 69.06988; 71.08553	42.61; 31.86; 60.63; 100.00; 33.68; 40.51	41.03858; 43.05423; 55.05423; 57.06988; 69.06988; 71.08553	100.00; 37.71; 29.15; 76.75; 20.18; 20.67
520	198.18524	197.1779644	C12H23NO	CCCCCCCCN1CCCC1=O	3033871	41.03858; 43.05423; 57.06988; 71.08553; 84.04439; 86.06004; 99.11683; 114.09134; 198.18524	6.31; 8.19; 11.75; 9.70; 5.50; 29.23; 6.66; 9.11; 100.00	41.03858; 43.05423; 55.05423; 57.06988; 58.06513; 69.06988; 71.08553; 84.04439; 86.06004; 98.06004; 100.07569; 112.07569; 126.09134; 128.10699; 180.17468; 198.18524	87.51; 67.50; 62.74; 44.95; 11.81; 22.73; 64.50; 14.77; 19.77; 100.00; 44.51; 12.55; 32.00; 19.26; 13.59; 47.85	41.03858; 43.01784; 43.05423; 44.01309; 44.04948; 55.05423; 56.04948; 57.03349; 57.06988; 58.06513; 68.04948; 69.03349; 70.06513; 81.06988; 83.08553; 84.04439; 84.08078; 86.06004; 95.08553; 98.06004; 98.09643; 109.10118; 112.07569; 140.10699; 154.12264	100.00; 17.15; 85.76; 18.46; 22.51; 42.07; 43.78; 9.43; 37.65; 30.00; 22.28; 96.28; 16.94; 11.47; 8.62; 91.60; 7.94; 40.96; 12.92; 13.30; 7.72; 8.26; 13.33; 11.83; 8.91
521	127.11174	126.1044651	C8H14O	CCCCCC(C#C)O	13166	41.03858; 43.05423; 55.05423; 57.06988; 67.05423; 69.06988; 71.08553; 79.05423; 81.06988; 83.08553; 101.09609; 109.10118	36.10; 60.67; 73.86; 54.19; 48.22; 83.97; 87.76; 23.48; 83.17; 100.00; 28.51; 59.97	39.02293; 41.03858; 55.05423; 57.06988; 69.06988; 79.05423; 81.06988; 83.08553; 93.06988; 109.10118	98.33; 31.64; 49.59; 38.99; 24.30; 30.36; 100.00; 72.76; 42.32; 36.33	39.02293; 41.03858; 43.05423; 51.02293; 55.01784; 55.05423; 57.06988; 65.03858; 79.05423; 81.06988; 93.06988	79.78; 100.00; 88.64; 50.33; 56.08; 42.72; 79.98; 41.25; 70.25; 59.54; 53.97
522	237.18491	236.17763	C15H24O2	CCCCCCOC1=C(C(=C(C(=C1)C)O)C)C	119193	43.05423; 85.10118; 135.08044; 137.05971; 151.07536; 153.09101; 237.18491	23.97; 13.08; 45.07; 13.12; 10.73; 100.00; 73.45	41.03858; 43.05423; 55.05423; 57.06988; 69.06988; 79.05423; 81.06988; 85.10118; 107.08553; 119.08553; 121.06479; 123.08044; 125.09609; 127.11174; 135.08044; 137.05971; 137.09609; 141.12739; 143.14304; 151.07536; 153.09101; 165.09101; 177.12739; 179.10666; 195.13796; 209.18999; 237.18491	20.27; 59.62; 36.57; 31.65; 12.42; 23.07; 9.87; 26.85; 11.93; 17.27; 21.79; 16.76; 16.37; 9.76; 99.08; 24.09; 38.29; 32.56; 19.78; 44.86; 100.00; 10.94; 16.99; 11.12; 13.03; 14.35; 68.39	41.03858; 43.05423; 55.05423; 57.06988; 65.03858; 67.05423; 79.05423; 81.06988; 97.06479; 107.08553; 109.06479; 111.08044; 117.06988; 119.08553; 121.06479; 123.08044; 125.09609; 133.06479; 135.08044; 137.09609; 139.11174; 141.12739; 143.14304; 149.05971; 149.09609; 151.07536; 153.09101; 163.11174; 165.09101; 177.12739; 179.10666	18.44; 100.00; 33.89; 24.66; 7.06; 19.53; 37.57; 15.34; 6.62; 8.31; 7.06; 8.40; 8.46; 27.01; 15.89; 11.03; 8.20; 35.66; 19.79; 10.71; 9.95; 10.48; 6.71; 10.23; 20.40; 29.73; 14.84; 7.75; 12.94; 9.43; 9.26
523	107.07027	106.0629942	C4H10O3	COCC(CO)O	92822	45.03349; 57.03349; 59.04914; 71.04914; 89.05971	42.60; 100.00; 55.26; 44.19; 48.20	57.03349; 59.04914; 71.04914	100.00; 55.60; 77.34	43.01784; 45.03349; 57.03349; 59.04914	44.22; 100.00; 39.52; 26.94
524	229.25259	228.2453156	C15H32O	CCCCCCCCCCCCCCCO	12397	43.05423; 55.05423; 57.06988; 69.06988; 71.08553; 83.08553; 85.10118; 97.10118; 99.11683; 101.09609; 103.11174; 113.13248; 127.14813; 131.14304; 211.24203; 229.25259	7.09; 8.02; 16.74; 9.00; 18.23; 8.27; 15.59; 5.45; 8.51; 6.46; 5.16; 8.20; 7.84; 6.72; 21.69; 100.00	43.05423; 55.05423; 57.06988; 59.08553; 69.06988; 71.08553; 83.08553; 85.10118; 97.10118; 99.11683; 101.13248; 103.11174; 229.25259	37.32; 31.84; 100.00; 11.21; 40.31; 59.24; 24.25; 42.52; 9.81; 24.28; 12.20; 9.63; 22.93	41.03858; 43.05423; 45.03349; 55.05423; 57.06988; 71.08553	26.90; 100.00; 17.75; 41.48; 88.07; 31.13
525	89.09609	88.088815	C5H12O	CCCCCO	6276	41.03858; 43.05423; 71.08553	32.25; 100.00; 98.31	41.03858; 43.05423; 71.08553	72.88; 100.00; 64.56	41.03858; 43.05423; 55.05423	52.51; 100.00; 22.34
526	71.08553	70.07825032	C5H10	CCCC=C	8004	43.05423; 71.08553	47.77; 100.00	43.05423; 55.05423	18.39; 100.00	43.05423; 55.05423; 69.06988	26.97; 100.00; 22.37
527	153.09101	152.0837296	C9H12O2	CC(COC1=CC=CC=C1)O	92839	95.04914; 135.08044	100.00; 55.12	41.03858; 67.05423; 79.05423; 81.06988; 83.08553; 95.04914; 107.04914; 135.08044	88.64; 27.23; 100.00; 71.57; 26.79; 87.71; 30.75; 76.41	41.03858; 65.03858; 67.05423; 77.03858; 79.05423; 95.04914	11.96; 19.23; 10.36; 100.00; 80.55; 33.33
528	174.05495	173.0476785	C10H7NO2	C1=CC=C(C=C1)N2C(=O)C=CC2=O	13662	146.06004; 174.05495	2.46; 100.00	120.04439; 174.05495	27.06; 100.00	53.00219; 55.01784; 65.03858; 92.04948; 94.06513; 104.04948; 120.04439; 122.02365; 146.06004	36.21; 21.56; 97.61; 45.50; 100.00; 51.24; 71.95; 21.63; 29.76
529	147.06652	146.0592462	C7H6N4	C1=CC=C(C=C1)N2C=NN=N2	138477	119.06037; 147.06652	0.73; 100.00	119.06037; 147.06652	22.86; 100.00	51.02293; 63.02293; 65.03858; 67.05423; 78.03383; 104.04948; 117.04472; 119.06037	79.30; 30.81; 71.00; 25.58; 39.85; 100.00; 50.47; 58.92
530	137.09609	136.088815	C9H12O	CCC(C1=CC=CC=C1)O	7147	91.05423; 119.08553; 137.09609	100.00; 58.53; 33.28	79.05423; 91.05423; 119.08553	10.51; 100.00; 12.66	65.03858; 77.03858; 79.05423; 89.03858; 91.05423; 93.06988; 103.05423	32.84; 84.10; 53.93; 15.18; 100.00; 30.12; 9.31
531	153.0481	152.0408194	C7H8N2S	C1=CC=C(C=C1)NC(=S)N	676454	136.02155; 153.04810	39.32; 100.00	136.02155; 153.04810	100.00; 56.69	51.02293; 59.99025; 65.03858; 67.05423; 92.04948; 94.06513	31.24; 36.41; 100.00; 23.11; 57.24; 28.11
532	150.10257	149.0952974	C8H11N3	CN(C)N=NC1=CC=CC=C1	23654	44.04948; 150.10257	22.17; 100.00	105.04472; 150.10257	100.00; 79.71	44.04948; 63.02293; 65.03858; 77.03858; 79.05423	76.07; 24.45; 99.10; 100.00; 25.86
533	175.08659	174.0793129	C10H10N2O	CC1=NN(C(=O)C1)C2=CC=CC=C2	4021	157.07602; 175.08659	1.32; 100.00	107.06037; 133.07602; 134.06004; 147.09167; 175.08659	8.19; 12.83; 10.74; 17.18; 100.00	40.01818; 65.03858; 77.03858; 79.05423; 105.04472; 107.06037; 134.06004	7.39; 20.90; 100.00; 12.91; 11.93; 13.76; 42.18
534	163.08659	162.0793129	C9H10N2O	C1CN(NC1=O)C2=CC=CC=C2	7090	118.06513; 163.08659	2.79; 100.00	79.05423; 107.06037; 118.06513; 163.08659	6.27; 6.71; 9.08; 100.00	65.03858; 67.05423; 79.05423; 92.04948; 94.06513; 118.06513; 120.08078	42.10; 100.00; 93.74; 46.86; 28.51; 46.13; 41.58
535	179.10666	178.0993797	C11H14O2	CCC(=O)OC(C)C1=CC=CC=C1	8432	105.06988; 123.08044	100.00; 7.92	29.03858; 57.03349; 75.04406; 77.03858; 79.05423; 103.05423; 105.06988	6.68; 15.55; 12.58; 8.81; 19.64; 8.12; 100.00	39.02293; 41.03858; 43.01784; 45.03349; 55.01784; 57.03349; 65.03858; 77.03858; 79.05423; 101.03858; 103.05423; 105.06988; 121.06479	5.86; 12.87; 8.34; 7.22; 4.37; 16.34; 13.19; 15.09; 38.63; 16.96; 29.06; 100.00; 10.57
536	135.08044	134.0731649	C9H10O	CCC(=O)C1=CC=CC=C1	7148	57.03349; 105.03349; 135.08044	28.04; 18.30; 100.00	39.02293; 41.00219; 57.03349; 67.05423; 77.03858; 79.05423; 83.08553; 91.05423; 105.03349; 117.06988; 133.06479; 135.08044	14.35; 12.69; 65.05; 13.39; 26.08; 24.27; 13.01; 31.02; 43.90; 38.25; 16.19; 100.00	39.02293; 51.02293; 53.03858; 57.03349; 63.02293; 65.03858; 67.05423; 77.03858; 91.05423; 105.03349	23.07; 37.40; 24.97; 20.86; 15.35; 60.38; 19.61; 100.00; 53.18; 14.64
537	233.22638	232.2191009	C17H28	CCCCCCCCCCCC1=CC=CC=C1	23194	55.05423; 69.06988; 81.06988; 83.08553; 91.05423; 95.08553; 105.06988; 107.08553; 123.11683; 135.11683; 149.13248; 151.14813; 233.22638	4.62; 5.70; 11.41; 3.19; 5.97; 7.57; 3.34; 4.67; 3.40; 2.46; 3.38; 4.95; 100.00	43.05423; 55.05423; 57.06988; 67.05423; 69.06988; 71.08553; 81.06988; 83.08553; 91.05423; 93.06988; 95.08553; 105.06988; 119.08553; 233.22638	22.33; 52.53; 37.17; 21.64; 59.82; 17.46; 100.00; 16.26; 53.18; 47.55; 51.64; 25.22; 29.48; 25.57	43.05423; 55.05423; 57.06988; 69.06988; 79.05423; 81.06988; 91.05423; 93.06988; 105.06988	56.92; 28.16; 29.09; 22.62; 37.94; 46.51; 100.00; 63.88; 83.18
538	163.03582	162.0285407	C5H10N2S2	C1CN(CCN1)C(=S)S	66829	87.09167; 163.03582	7.18; 100.00	44.04948; 70.06513; 87.09167; 117.97797; 129.04810; 135.00452; 163.03582	9.00; 23.02; 27.55; 10.49; 9.09; 11.81; 100.00	44.04948; 56.04948; 59.06037; 70.06513; 76.95142; 85.07602; 87.09167	33.92; 11.04; 9.36; 22.95; 100.00; 70.24; 14.22
539	131.11789	130.1106131	C6H14N2O	C1CN(CCN1)CCO	7677	113.10732; 131.11789	34.96; 100.00	87.09167; 99.09167; 113.10732; 131.11789	13.50; 100.00; 64.82; 99.77	44.04948; 45.03349; 56.04948; 70.06513; 85.07602; 87.09167; 99.09167; 113.10732	44.79; 55.56; 36.15; 83.93; 100.00; 38.79; 38.41; 49.78
540	193.16992	192.1626486	C12H20N2	C1CCC(CC1)(C#N)N2CCCCC2	62529	108.08078; 193.16993	100.00; 62.39	80.04948; 81.06988; 82.06513; 83.08553; 84.08078; 86.09643; 108.08078; 162.12773; 166.15903; 193.16993	31.34; 85.68; 15.73; 21.34; 34.01; 35.75; 100.00; 21.72; 33.74; 17.03	41.03858; 52.01818; 55.05423; 56.04948; 66.03383; 68.04948; 78.03383; 79.05423; 80.04948; 81.06988; 82.06513; 84.08078; 91.05423; 92.04948; 95.08553; 108.08078; 114.12773; 123.09167; 191.15428	46.40; 35.62; 28.52; 27.25; 94.95; 18.34; 25.57; 30.72; 100.00; 92.25; 39.59; 55.94; 44.66; 44.30; 24.28; 34.45; 23.48; 38.74; 92.40
541	61.06479	60.05751487	C3H8O	CCCO	1031	43.05423; 61.06479	100.00; 9.15	43.05423; 61.06479	100.00; 8.08	41.03858; 43.05423	53.31; 100.00
542	119.10666	118.0993797	C6H14O2	CCCOCC(C)O	15286	43.05423; 59.04914	100.00; 80.68	43.05423; 59.04914; 73.06479	100.00; 62.38; 24.71	41.03858; 43.05423	43.74; 100.00
543	133.12231	132.1150297	C7H16O2	CC(COC(C)(C)C)O	92629	57.06988; 59.04914	100.00; 25.93	57.06988; 59.04914	100.00; 52.08	41.03858; 57.06988	19.64; 100.00
544	215.23694	214.2296656	C14H30O	CCCCCCCCCCCCCCO	8209	43.05423; 55.05423; 57.06988; 69.06988; 71.08553; 83.08553; 85.10118; 89.09609; 97.10118; 99.11683; 113.13248; 117.12739; 127.14813; 131.14304; 197.22638; 215.23694	13.09; 15.37; 29.99; 14.46; 42.51; 11.55; 29.04; 7.31; 8.22; 18.04; 11.31; 15.22; 14.11; 6.76; 19.96; 100.00	41.03858; 43.05423; 55.05423; 57.06988; 59.08553; 69.06988; 71.08553; 83.08553; 85.10118; 99.11683; 215.23694	14.66; 44.65; 49.72; 100.00; 9.58; 46.97; 92.62; 20.91; 64.23; 14.21; 13.88	41.03858; 43.05423; 55.05423; 57.06988; 71.08553	27.39; 100.00; 45.89; 74.21; 34.08
545	197.22638	196.2191009	C14H28	CCCCCCCCCCCCC=C	14260	43.05423; 55.05423; 57.06988; 69.06988; 71.08553; 83.08553; 85.10118; 95.08553; 97.10118; 99.11683; 101.13248; 125.13248; 127.14813; 197.22638	29.56; 87.28; 81.84; 64.33; 78.96; 89.50; 84.09; 30.79; 55.52; 39.63; 50.38; 63.27; 50.07; 100.00	41.03858; 43.05423; 55.05423; 57.06988; 59.08553; 69.06988; 71.08553; 83.08553; 85.10118; 97.10118	16.34; 31.37; 100.00; 87.18; 20.89; 66.60; 63.94; 31.45; 22.90; 15.27	41.03858; 43.05423; 55.05423; 57.06988; 69.06988; 95.08553	90.11; 36.50; 100.00; 42.06; 25.32; 14.62
546	109.03178	108.0245007	C3H8O2S	C(C(CS)O)O	7291	73.01065; 91.02121	100.00; 85.94	46.99500; 57.03349; 75.04406; 91.02121	58.86; 100.00; 34.93; 42.45	34.99500; 45.03349; 46.99500; 58.99500	9.24; 8.57; 100.00; 21.33
547	201.22129	200.2140155	C13H28O	CCCCCCCCCCCCCO	8207	43.05423; 55.05423; 57.06988; 61.06479; 69.06988; 71.08553; 83.08553; 85.10118; 97.10118; 99.11683; 113.13248; 117.12739; 127.14813; 131.14304; 183.21073; 201.22129	38.70; 40.19; 56.55; 16.44; 25.48; 75.24; 23.87; 70.11; 14.14; 26.18; 27.22; 16.72; 14.28; 20.83; 20.63; 100.00	41.03858; 43.05423; 55.05423; 57.06988; 69.06988; 71.08553; 83.08553; 85.10118; 99.11683	16.02; 40.81; 34.85; 81.59; 33.49; 100.00; 15.41; 32.96; 9.89	41.03858; 43.05423; 55.05423; 57.06988	52.40; 100.00; 46.40; 86.10
548	183.21073	182.2034508	C13H26	CCCCCCCCCCCC=C	17095	43.05423; 55.05423; 57.06988; 59.08553; 69.06988; 71.08553; 81.06988; 83.08553; 85.10118; 97.10118; 101.13248; 111.11683; 115.14813; 183.21073	39.36; 80.11; 73.84; 36.87; 100.00; 84.67; 38.35; 80.64; 72.50; 49.62; 32.93; 55.27; 43.35; 66.05	41.03858; 43.05423; 55.05423; 57.06988; 59.08553; 69.06988; 71.08553; 83.08553; 85.10118; 97.10118	22.41; 44.19; 100.00; 99.12; 43.09; 85.98; 60.04; 36.86; 25.72; 26.10	41.03858; 43.05423; 55.05423; 57.06988; 69.06988	100.00; 32.40; 66.26; 26.00; 23.99
549	173.18999	172.1827154	C11H24O	CCCCCCCCCCCO	8184	41.03858; 43.05423; 55.05423; 57.06988; 61.06479; 69.06988; 71.08553; 83.08553; 85.10118; 89.09609; 99.11683; 103.11174; 155.17943; 173.18999	17.55; 52.19; 42.19; 100.00; 10.71; 31.81; 83.69; 20.04; 58.74; 10.84; 22.13; 12.70; 12.22; 63.99	43.05423; 55.05423; 57.06988; 69.06988; 71.08553; 85.10118	76.40; 30.28; 100.00; 30.63; 47.72; 26.83	41.03858; 43.05423; 57.06988	100.00; 66.92; 79.65
550	215.0914	214.0841235	C10H14O5	CC(=C)C(=O)OCCOC(=O)CC(=O)C	88855	41.03858; 43.01784; 69.03349; 71.04914; 85.02841; 87.04406; 103.03897; 113.05971; 127.03897; 129.05462; 197.08084; 215.09140	41.76; 23.71; 100.00; 23.49; 42.85; 52.40; 13.07; 54.06; 10.49; 27.56; 18.12; 36.79	41.03858; 43.01784; 45.03349; 57.03349; 69.03349; 71.04914; 83.01276; 85.02841; 87.04406; 103.03897; 109.02841; 111.04406; 113.05971	47.42; 28.77; 15.93; 18.66; 100.00; 16.42; 15.63; 43.00; 15.33; 14.57; 18.34; 25.19; 21.73	41.03858; 43.01784; 45.03349; 57.03349; 59.04914; 69.03349; 71.04914; 85.02841; 87.04406; 103.03897	100.00; 21.89; 11.82; 14.83; 9.34; 20.37; 25.39; 21.50; 8.14; 8.07
551	152.10699	151.099714	C9H13NO	CN(C)CC1=CC=CC=C1O	32897	107.04914; 152.10699	100.00; 40.02	58.06513; 79.05423; 107.04914	13.68; 33.44; 100.00	53.03858; 58.06513; 65.03858; 77.03858; 79.05423; 91.05423; 107.04914	15.28; 54.14; 15.39; 100.00; 83.14; 79.88; 37.40
552	165.12739	164.1201151	C11H16O	CCCC(C)C1=CC=CC=C1O	99016	39.02293; 41.03858; 43.05423; 65.03858; 71.08553; 95.04914; 101.09609; 121.06479; 123.08044; 165.12739	31.57; 34.09; 58.83; 62.17; 23.95; 100.00; 32.89; 25.55; 28.79; 48.99	41.03858; 43.05423; 53.03858; 55.05423; 65.03858; 67.05423; 69.06988; 71.08553; 81.06988; 83.08553; 93.06988; 95.04914; 99.08044; 105.06988; 121.06479	100.00; 99.47; 22.05; 28.07; 38.12; 17.28; 11.86; 26.83; 18.34; 18.14; 10.50; 55.75; 18.22; 19.45; 23.53	39.02293; 41.03858; 43.05423; 51.02293; 53.03858; 65.03858; 67.05423; 77.03858; 79.05423; 81.06988; 91.05423; 93.06988; 95.04914; 103.05423; 105.03349; 105.06988; 107.04914; 107.08553; 119.04914; 121.06479; 147.11683	18.16; 77.85; 69.36; 15.20; 52.47; 100.00; 61.47; 43.74; 54.63; 24.17; 75.58; 32.34; 26.68; 22.66; 27.31; 87.38; 16.28; 24.60; 16.83; 67.50; 17.51
553	239.11972	238.1124429	C14H19ClO	CC(C)(C)C1(CO1)CCC2=CC=C(C=C2)Cl	94684	57.06988; 125.01525; 207.09350; 209.10915; 221.10915; 239.11972	10.55; 23.24; 18.56; 28.11; 20.24; 100.00	41.03858; 43.01784; 55.05423; 57.06988; 59.08553; 71.08553; 77.03858; 81.06988; 83.08553; 101.09609; 125.01525; 139.03090; 151.03090; 163.03090; 165.04655; 183.05712; 205.07785; 207.09350; 209.10915; 221.10915	33.38; 41.87; 22.46; 52.23; 17.02; 14.62; 13.65; 12.64; 49.00; 14.13; 55.63; 100.00; 16.79; 22.35; 23.91; 13.74; 13.07; 10.89; 10.56; 19.88	41.03858; 75.02293; 77.03858; 79.05423; 83.08553; 89.03858; 91.05423; 98.99960; 103.05423; 110.99960; 113.01525; 125.01525; 137.01525; 139.03090; 149.01525; 151.03090; 153.04655; 159.11683; 163.03090; 165.04655; 181.04147; 191.06220; 193.07785; 205.07785; 209.10915; 239.11972	21.07; 13.77; 24.76; 18.73; 11.25; 14.33; 8.79; 18.54; 100.00; 48.92; 39.77; 57.16; 17.28; 46.76; 15.11; 28.22; 17.71; 15.40; 21.44; 17.76; 10.87; 17.29; 9.87; 40.00; 8.72; 9.12
554	268.95335	267.946077	C9H7Cl3O3	CC(C(=O)O)OC1=CC(=C(C=C1Cl)Cl)Cl	7158	196.93222; 268.95335	28.85; 100.00	196.93222; 268.95335	100.00; 38.53	43.01784; 45.03349; 122.97628; 129.01017; 162.97120; 166.92166; 168.93731; 172.95555; 180.93731; 184.95555; 186.97120; 188.98685; 196.93222; 198.94787; 204.94538; 218.96103; 220.93222; 222.94787	34.14; 28.69; 7.81; 5.44; 34.29; 25.55; 21.48; 6.26; 16.96; 7.25; 52.35; 6.60; 85.22; 8.22; 5.92; 7.69; 20.22; 100.00
555	324.15942	323.1521435	C20H21NO3	CC(C)C1=C(C(=CC=C1)C(C)C)N2C(=O)C3=C(C2=O)C=C(C=C3)O	11723708	296.16451; 324.15942; 0.0090339	3.78; 100.00; 0.0056981	322.14377; 324.15942	63.65; 100.00	93.06988; 95.08553; 117.06988; 119.08553; 121.02841; 121.10118; 132.08078; 134.02365; 134.09643; 136.03930; 143.08553; 145.10118; 147.00767; 147.11683; 160.11208; 161.13248; 164.03422; 174.12773; 176.03422; 176.14338; 178.04987; 204.13829; 232.09682; 252.06552; 256.09682; 266.08117; 282.11247; 282.14886; 294.14886; 296.16451; 322.14377	9.27; 16.07; 29.98; 28.28; 100.00; 7.89; 8.80; 14.67; 23.85; 10.73; 17.23; 12.31; 11.51; 8.28; 7.05; 6.61; 22.43; 10.03; 19.68; 30.28; 7.06; 9.48; 6.91; 9.59; 28.72; 9.21; 10.79; 8.50; 29.41; 9.46; 36.93
556	106.08625	105.0789786	C4H11NO2	C(COCCO)N	13578	44.04948; 45.03349; 89.05971	100.00; 68.31; 20.60	44.04948; 45.03349; 57.03349; 62.06004; 74.06004	99.39; 100.00; 12.77; 21.89; 27.27	44.04948; 45.03349	100.00; 60.92
557	163.13287	162.1255944	C8H18O3	CCCCOCCOCCO	8177	43.01784; 45.03349; 55.05423; 57.06988; 63.04406; 89.05971	12.77; 100.00; 8.51; 51.12; 24.39; 15.66	41.03858; 45.03349; 55.05423; 57.06988; 59.04914; 63.04406	14.00; 100.00; 16.41; 88.24; 12.66; 21.39	41.03858; 43.05423; 45.03349; 55.05423; 57.06988	29.35; 19.26; 100.00; 13.31; 37.31
558	205.14344	204.1361591	C10H20O4	CCCCOCCOCCOC(=O)C	31288	43.01784; 45.03349; 55.05423; 57.06988; 61.02841; 71.04914; 73.06479; 87.04406; 89.05971; 131.07027; 145.12231; 205.14344	100.00; 42.70; 31.09; 45.01; 34.26; 78.27; 18.78; 41.45; 29.68; 34.59; 15.86; 15.98	41.03858; 43.01784; 45.03349; 55.05423; 57.03349; 57.06988; 59.04914; 59.08553; 61.02841; 63.04406; 73.06479; 75.04406; 87.04406; 89.05971	5.98; 44.25; 21.65; 23.53; 7.17; 100.00; 6.65; 10.84; 19.85; 9.95; 9.16; 10.12; 20.02; 8.21	41.03858; 43.01784; 43.05423; 45.03349; 55.05423; 57.06988; 61.02841	40.24; 51.97; 12.19; 65.81; 41.76; 100.00; 18.50
559	204.10528	203.098	C9H17NO2S	CCCCOCCOCCSC#N	8196	43.01784; 45.03349; 55.05423; 57.06988; 59.99025; 71.04914; 73.06479; 77.00556; 86.00590; 87.04406; 88.02155; 95.04914; 97.06479; 99.08044; 104.01646; 113.05971; 141.09101; 204.10528	21.45; 45.25; 33.05; 37.59; 98.03; 32.70; 23.24; 9.37; 100.00; 12.33; 11.89; 33.91; 48.59; 19.67; 39.52; 11.82; 50.71; 38.85	45.03349; 51.02293; 55.05423; 57.06988; 59.08553; 59.99025; 61.02841; 71.04914; 71.99025; 73.06479; 74.00590; 86.00590; 87.04406; 88.02155; 97.06479; 104.01646; 105.03686; 148.04268	15.55; 5.85; 51.27; 61.97; 7.87; 100.00; 13.02; 11.12; 7.19; 10.26; 6.72; 12.44; 10.37; 9.38; 9.67; 22.02; 6.14; 6.95	45.03349; 55.05423; 57.06988; 59.99025; 61.01065; 62.00590; 71.99025; 86.00590; 88.02155; 95.04914; 97.06479	8.60; 15.92; 16.89; 100.00; 8.41; 14.48; 46.34; 27.67; 14.48; 5.85; 7.51
560	172.11545	171.1081707	C9H17NS	CCC(C)C1N=C(C(S1)C)C	5362564	57.06988; 172.11545	8.58; 100.00	42.03383; 55.05423; 57.06988; 68.04948; 69.06988; 70.06513; 82.06513; 84.08078; 102.03720; 114.03720; 116.05285; 118.06850; 142.06850; 144.08415; 156.08415; 172.11545	10.39; 7.51; 14.65; 7.84; 6.23; 7.48; 10.28; 12.24; 12.01; 40.54; 67.62; 9.67; 13.89; 22.51; 8.86; 100.00	41.03858; 42.03383; 43.05423; 54.03383; 55.05423; 56.04948; 57.06988; 61.01065; 67.05423; 68.04948; 69.06988; 70.06513; 73.01065; 80.04948; 82.06513; 88.02155; 100.02155; 101.04195; 114.03720; 116.05285; 129.07325; 170.09980	68.34; 49.08; 28.43; 59.34; 38.03; 35.29; 50.30; 36.32; 21.68; 40.22; 57.62; 29.42; 31.40; 64.92; 100.00; 27.09; 25.03; 29.12; 63.32; 50.67; 17.28; 32.27
561	135.10157	134.0942943	C6H14O3	CCOCCOCCO	8146	45.03349; 63.04406; 73.06479; 89.05971	100.00; 24.36; 28.64; 15.41	45.03349; 59.04914; 63.04406; 73.06479; 89.05971	100.00; 29.70; 14.89; 27.54; 13.27	43.01784; 45.03349; 73.06479	7.97; 100.00; 7.55
562	177.11213	176.104859	C8H16O4	CCOCCOCCOC(=O)C	8165	43.01784; 45.03349; 71.04914; 73.06479; 87.04406; 89.05971; 117.09101; 131.07027	41.90; 33.86; 100.00; 57.19; 25.71; 51.73; 28.42; 23.46	29.03858; 43.01784; 45.03349; 57.03349; 59.04914; 61.02841; 71.04914; 73.06479; 87.04406; 89.05971	18.29; 100.00; 72.66; 20.54; 27.96; 31.44; 29.42; 68.50; 33.33; 48.42	43.01784; 45.03349; 61.02841; 73.06479	40.21; 100.00; 12.98; 20.01
563	189.11213	188.104859	C9H16O4	CCOCCOCCOC(=O)C=C	81766	45.03349; 47.04914; 55.01784; 71.04914; 73.06479; 89.05971; 99.04406; 117.09101; 143.07027	64.49; 49.51; 27.42; 78.08; 100.00; 25.67; 20.06; 24.89; 16.81	29.03858; 45.03349; 47.04914; 55.01784; 59.04914; 61.02841; 71.04914; 73.02841; 73.06479; 75.04406; 91.07536; 99.04406	13.77; 51.02; 45.38; 100.00; 29.27; 21.58; 19.43; 19.54; 76.30; 22.59; 21.57; 16.29	29.03858; 43.01784; 45.03349; 47.04914; 53.00219; 55.01784; 57.03349; 59.04914; 73.06479	28.66; 20.27; 73.94; 23.68; 18.83; 63.31; 31.70; 24.10; 100.00
564	175.16926	174.1619799	C10H22O2	CCCCC(CC)COCCO	15260	45.03349; 55.05423; 57.06988; 63.04406; 71.08553; 83.08553; 85.10118; 113.13248	33.20; 22.04; 100.00; 16.81; 17.61; 14.70; 30.65; 26.73	43.05423; 45.03349; 57.06988; 63.04406; 83.08553; 85.10118; 99.11683; 113.13248	25.83; 95.00; 100.00; 34.21; 18.39; 22.94; 15.53; 21.34	41.03858; 43.05423; 45.03349; 55.05423; 57.06988; 71.08553	44.51; 61.61; 63.20; 50.99; 100.00; 26.03
565	448.23834	447.2310626	C30H29N3O	CC(C)(C1=CC=CC=C1)C2=CC(=C(C(=C2)N3N=C4C=CC=CC4=N3)O)C(C)(C)C5=CC=CC=C5	112412	330.16009; 370.19139; 448.23834	17.51; 29.17; 100.00	117.06988; 119.08553; 251.14304; 290.12879; 292.14444; 329.18999; 352.14444; 354.16009; 368.17574; 370.19139; 394.19139; 432.20704; 448.23834	13.45; 18.68; 18.03; 19.38; 19.92; 10.84; 10.02; 9.90; 23.26; 65.97; 10.62; 14.00; 100.00	77.03858; 93.06988; 119.08553; 143.08553; 145.10118; 169.10118; 173.09609; 270.10257; 288.14952; 290.12879; 298.13387; 300.14952; 312.11314; 314.12879; 328.14444; 338.16517; 340.18082; 342.18524; 352.14444; 368.17574; 384.20704; 394.19139; 396.20704; 398.22269; 404.21212; 408.20704; 418.19139; 420.20704; 422.22269; 432.20704; 446.22269	13.30; 12.69; 26.49; 34.84; 34.95; 15.27; 14.31; 15.55; 11.55; 12.29; 11.78; 17.59; 10.69; 16.46; 26.87; 9.76; 9.35; 14.81; 33.33; 34.51; 12.42; 100.00; 64.58; 12.80; 16.91; 14.72; 25.52; 16.94; 31.34; 48.39; 82.03
566	226.09749	225.090212	C13H11N3O	CC1=CC(=C(C=C1)O)N2N=C3C=CC=CC3=N2	17113	120.05562; 226.09749	25.43; 100.00	79.05423; 107.04914; 120.05562	54.89; 47.34; 100.00	51.02293; 65.03858; 77.03858; 79.05423; 92.04948; 94.06513; 118.03997; 120.05562; 132.05562; 144.05562; 182.07127; 184.08692; 208.08692; 209.07094	14.85; 19.03; 35.16; 20.26; 38.61; 25.30; 40.66; 100.00; 16.66; 20.16; 19.62; 24.30; 61.92; 13.53
567	352.23834	351.2310626	C22H29N3O	CCC(C)(C)C1=CC(=C(C(=C1)N2N=C3C=CC=CC3=N2)O)C(C)(C)CC	33263	233.18999; 352.23834	9.78; 100.00	71.08553; 120.05562; 165.12739; 233.18999; 322.19139; 324.20704; 336.20704; 350.22269; 352.23834	6.78; 26.49; 4.96; 6.47; 8.38; 4.72; 9.10; 9.96; 100.00	39.02293; 67.05423; 69.06988; 71.08553; 95.08553; 101.13248; 109.10118; 118.03997; 120.05562; 121.10118; 137.09609; 156.05562; 161.09609; 163.11174; 214.09749; 228.17468; 236.11822; 238.13387; 244.16959; 244.18082; 250.09749; 252.11314; 254.12879; 258.16009; 264.11314; 267.14919; 278.12879; 280.14444; 286.19139; 336.20704; 352.23834	13.20; 49.40; 9.92; 100.00; 20.72; 9.97; 32.41; 9.58; 63.09; 44.95; 8.88; 28.15; 18.05; 15.26; 9.20; 9.51; 18.04; 13.36; 10.50; 9.61; 22.61; 17.81; 20.80; 11.85; 17.09; 16.18; 21.98; 17.74; 13.08; 19.03; 21.10
568	213.18491	212.17763	C13H24O2	CCC(C)(C)C1CCCCC1OC(=O)C	62240	43.05423; 71.08553; 81.06988; 83.08553; 125.13248; 141.12739; 153.16378; 171.17434; 213.18491	6.16; 30.44; 5.07; 5.64; 17.23; 5.49; 28.68; 8.64; 100.00	41.03858; 43.01784; 55.05423; 57.06988; 69.06988; 71.08553; 81.06988; 83.08553; 85.10118; 123.11683; 125.13248; 153.16378; 213.18491	11.26; 26.64; 24.16; 9.96; 11.03; 56.37; 29.57; 37.50; 11.48; 100.00; 21.19; 37.55; 35.22	41.03858; 43.01784; 43.05423; 45.03349; 55.05423; 57.06988; 67.05423; 69.06988; 71.08553; 79.05423; 81.06988; 83.08553; 85.10118; 93.06988; 97.10118; 99.08044; 123.11683; 141.16378; 143.10666	26.84; 43.08; 10.72; 11.07; 44.72; 11.31; 16.88; 22.61; 8.29; 21.44; 71.08; 100.00; 14.40; 9.75; 8.47; 8.20; 12.13; 10.43; 10.14
569	149.11722	148.1099444	C7H16O3	CCCOCCOCCO	81313	43.05423; 45.03349; 61.06479; 63.04406	66.02; 100.00; 15.82; 23.35	43.05423; 45.03349; 59.04914; 63.04406	59.10; 100.00; 12.23; 25.58	41.03858; 43.05423; 45.03349	34.54; 100.00; 93.10
570	124.07569	123.0684139	C7H9NO	C1=CC=NC(=C1)CCO	7675	80.04948; 106.06513; 124.07569	30.34; 100.00; 45.37	78.03383; 80.04948; 106.06513	36.78; 41.19; 100.00	51.02293; 53.03858; 78.03383; 79.05423; 80.04948; 89.03858; 92.04948; 106.06513	26.04; 24.07; 100.00; 12.47; 31.91; 18.26; 29.66; 15.14
571	289.18296	288.1756859	C14H28O4Si	CCO[Si](CCC1CCC2C(C1)O2)(OCC)OCC	154915	197.09923; 199.11488; 243.14110; 289.18296	41.69; 100.00; 32.78; 40.90	69.06988; 81.06988; 107.08553; 111.08044; 125.09609; 127.11174; 135.04720; 149.06285; 149.09923; 151.07850; 163.07850; 165.09415; 215.10980; 231.10471; 233.12036; 243.14110; 245.15675; 261.15166; 289.18296	7.27; 7.43; 21.65; 14.05; 51.43; 10.53; 17.09; 16.05; 10.39; 14.87; 11.66; 13.21; 18.67; 100.00; 49.07; 19.81; 12.45; 62.94; 29.67	29.03858; 45.03349; 55.05423; 57.03349; 67.05423; 69.06988; 79.05423; 81.06988; 93.06988; 95.04914; 107.08553; 109.10118; 111.08044; 125.09609; 215.10980	12.15; 30.76; 22.59; 6.89; 13.01; 20.33; 6.90; 20.85; 28.23; 11.40; 100.00; 11.38; 8.02; 25.65; 9.19
572	198.12773	197.1204495	C14H15N	C1=CC=C(C=C1)CCCC2=CC=CC=N2	459494	119.08553; 198.12773	9.53; 100.00	65.03858; 77.03858; 78.03383; 79.05423; 80.04948; 91.05423; 92.04948; 93.06988; 105.06988; 106.06513; 119.08553; 198.12773	9.05; 20.47; 27.52; 10.41; 21.76; 37.75; 21.67; 9.31; 36.53; 11.60; 17.83; 100.00	51.02293; 53.03858; 65.03858; 77.03858; 78.03383; 79.05423; 89.03858; 91.05423; 92.04948; 93.06988; 103.05423; 117.06988; 127.05423; 129.06988; 168.08078; 169.10118; 172.11208; 182.09643; 196.11208	9.62; 11.20; 52.97; 45.92; 13.79; 21.57; 36.05; 100.00; 7.92; 6.59; 13.31; 7.31; 18.48; 19.32; 6.77; 12.59; 11.21; 15.44; 46.75
573	321.03621	320.0289346	C14H12N2O3S2	CC1=C(C2=C(C=C1)N=C(S2)C3=CC=C(C=C3)N)S(=O)(=O)O	174223	239.06375; 321.03621	9.37; 100.00	239.06375; 321.03621	37.62; 100.00	64.96918; 65.03858; 92.04948; 104.04948; 106.06513; 119.06037; 136.02155; 160.02155; 175.03245; 177.04810; 199.03245; 201.04810; 212.05285; 223.03245; 224.05285; 225.04810; 237.04810; 239.06375; 304.00966; 321.03621	10.14; 23.47; 13.41; 19.92; 6.30; 20.04; 29.21; 7.85; 8.82; 100.00; 9.24; 9.92; 6.94; 18.03; 9.24; 37.17; 10.14; 54.78; 16.23; 10.31
574	205.15869	204.1514153	C14H20O	CC(CC1=CC=C(C=C1)C(C)(C)C)C=O	228987	91.05423; 147.11683; 187.14813; 205.15869	20.94; 45.96; 100.00; 49.54	41.03858; 55.05423; 57.06988; 91.05423; 93.06988; 105.06988; 119.08553; 131.08553; 133.10118; 147.11683; 161.13248; 171.11683; 175.14813; 187.14813	18.44; 29.13; 35.45; 90.56; 14.80; 25.37; 42.27; 37.37; 29.19; 63.07; 12.25; 14.90; 13.32; 100.00	41.03858; 51.02293; 55.05423; 57.06988; 81.06988; 83.08553; 89.03858; 91.05423; 93.06988; 95.08553; 105.06988; 107.08553; 109.10118; 115.05423; 117.06988; 119.08553; 121.10118; 131.08553; 133.10118; 147.11683; 161.13248; 171.11683; 203.14304	100.00; 10.63; 12.54; 45.80; 15.37; 11.37; 24.32; 58.62; 60.05; 32.10; 34.37; 26.41; 15.84; 16.80; 10.28; 23.61; 22.17; 29.81; 10.63; 27.30; 14.91; 36.06; 15.21
575	351.33699	350.329714	C22H42N2O	CCCCCCCCC=CCCCCCCCC1=NCCN1CCO	7233	41.03858; 43.05423; 55.05423; 57.06988; 69.06988; 71.08553; 81.06988; 125.13248; 225.19614; 237.19614; 237.25768; 253.22744; 265.22744; 267.24309; 333.32643; 351.33699	1.74; 3.69; 3.41; 6.29; 1.54; 2.24; 1.46; 1.63; 1.80; 1.74; 1.76; 1.66; 1.49; 1.75; 5.85; 100.00	41.03858; 43.05423; 55.05423; 57.06988; 67.05423; 69.04472; 69.06988; 71.08553; 81.06988; 83.06037; 93.06988; 97.10118; 107.08553; 109.10118; 111.09167; 121.10118; 123.11683; 127.08659; 129.10224; 139.14813; 223.18049; 223.24203; 227.21179; 237.19614; 237.25768; 279.24309; 293.25874; 307.27439; 333.32643; 349.32134; 351.33699	14.90; 16.95; 24.08; 26.64; 6.70; 7.49; 15.22; 7.99; 6.39; 6.83; 4.76; 8.75; 8.11; 6.54; 8.38; 5.64; 5.78; 15.26; 10.59; 9.08; 10.44; 8.31; 6.52; 6.85; 8.85; 6.54; 9.04; 5.79; 26.85; 5.32; 100.00	41.03858; 43.05423; 55.05423; 57.04472; 57.06988; 67.05423; 69.04472; 69.06988; 71.06037; 71.08553; 79.05423; 81.06988; 83.06037; 85.07602; 86.06004; 93.06988; 95.08553; 107.08553; 111.09167; 121.10118; 139.12297; 139.14813; 167.15428; 193.16993; 221.20123; 235.21688; 249.23253; 263.24818; 305.29513; 307.31078	89.84; 100.00; 92.09; 9.07; 62.46; 25.29; 22.05; 30.17; 6.65; 6.68; 38.75; 17.16; 12.76; 6.34; 8.94; 39.40; 7.64; 19.70; 10.50; 11.48; 10.65; 6.96; 10.20; 5.42; 8.78; 11.60; 6.05; 6.19; 7.62; 9.93
576	180.06552	179.0582431	C9H9NO3	CC(=O)OC1=CC=CC=C1C(=O)N	79747	120.04439; 121.02841; 138.05495; 180.06552	30.56; 66.06; 100.00; 41.21	43.01784; 121.02841; 163.03897	10.26; 100.00; 16.15	43.01784; 44.01309; 51.02293; 63.02293; 65.03858; 79.01784; 91.01784; 120.04439; 121.02841; 145.02841	8.16; 8.34; 17.79; 11.10; 13.96; 6.95; 5.78; 7.72; 100.00; 4.76
577	151.11174	150.1044651	C10H14O	CCC(C)C1=CC=CC=C1O	6984	51.02293; 57.06988; 79.05423; 95.04914; 99.08044; 101.09609; 105.06988; 133.10118; 151.11174	5.47; 12.45; 5.83; 100.00; 7.99; 11.96; 7.73; 6.85; 19.96	41.03858; 55.05423; 57.06988; 65.03858; 79.05423; 81.06988; 83.08553; 95.04914; 97.06479; 99.08044; 105.06988; 121.06479; 131.08553; 133.10118; 151.11174	48.62; 35.28; 73.21; 23.95; 100.00; 29.99; 24.90; 58.11; 20.39; 18.25; 38.87; 24.69; 16.86; 60.43; 26.05	39.02293; 41.03858; 51.02293; 53.03858; 55.05423; 65.03858; 67.05423; 77.03858; 79.05423; 81.06988; 83.08553; 91.05423; 93.06988; 95.04914; 105.06988; 107.08553; 117.06988	22.23; 36.16; 21.80; 21.21; 27.67; 100.00; 20.23; 26.84; 24.67; 35.67; 12.28; 19.56; 11.59; 12.44; 14.25; 15.83; 24.65
578	196.01598	195.0087061	C9H6ClNO2	C1=CC=C2C(=C1)C(=O)N(C2=O)CCl	87154	160.03930; 196.01598	18.44; 100.00	133.02841; 160.03930; 196.01598	54.15; 100.00; 47.96	51.02293; 53.03858; 63.02293; 79.05423; 105.03349; 133.02841; 160.03930	21.18; 9.00; 11.86; 9.15; 100.00; 19.70; 22.06
579	186.14885	185.1415788	C10H19NO2	CCN(CC)CCOC(=O)C(=C)C	61012	98.09643; 100.11208; 186.14886	16.52; 100.00; 7.60	41.03858; 69.03349; 74.09643; 86.09643; 87.04406; 98.09643; 100.11208; 113.05971	23.95; 45.54; 12.65; 8.37; 8.37; 9.83; 100.00; 7.70	39.02293; 41.03858; 43.05423; 69.03349; 71.04914; 74.09643; 86.09643; 100.11208; 116.10699	8.84; 100.00; 11.85; 22.46; 19.80; 6.54; 7.49; 21.87; 12.72
580	118.12264	117.1153641	C6H15NO	CC(C)(CO)N(C)C	23435	100.11208; 118.12264	93.51; 100.00	44.04948; 46.06513; 72.08078; 86.09643; 88.11208; 100.11208; 118.12264	97.76; 86.09; 31.18; 100.00; 59.99; 81.72; 57.72	44.04948; 46.06513; 55.05423; 86.09643	100.00; 10.69; 25.77; 24.72
581	144.1019	143.0946287	C7H13NO2	CN(C)CCOC(=O)C=C	17111	46.06513; 70.06513; 72.08078	16.97; 10.83; 100.00	44.04948; 45.03349; 55.01784; 58.06513; 72.08078; 90.09134	8.56; 26.64; 37.98; 17.68; 100.00; 13.70	41.03858; 46.06513; 55.01784; 57.03349; 58.06513; 70.06513; 72.08078; 88.07569	5.30; 5.32; 17.30; 5.92; 15.29; 16.06; 100.00; 6.04
582	158.11755	157.1102787	C8H15NO2	CC(=C)C(=O)OCCN(C)C	17869	72.08078; 87.04406; 113.05971	100.00; 9.62; 9.27	41.03858; 44.04948; 58.06513; 69.03349; 71.04914; 72.08078; 113.05971	48.03; 8.38; 19.34; 62.82; 12.29; 100.00; 13.82	39.02293; 41.03858; 58.06513; 69.03349; 70.06513; 72.08078	20.86; 100.00; 11.89; 12.47; 9.69; 94.49
583	231.23186	230.2245802	C14H30O2	CCCCCCCCCCCCOCCO	24750	43.05423; 45.03349; 55.05423; 57.06988; 63.04406; 69.06988; 71.08553; 83.08553; 85.10118; 97.10118; 99.11683; 113.13248; 133.12231; 169.19508; 213.22129; 231.23186	9.18; 51.51; 7.79; 14.79; 40.24; 7.97; 15.12; 5.15; 11.74; 4.99; 7.73; 8.22; 5.39; 10.85; 8.68; 100.00	43.05423; 45.03349; 55.05423; 57.06988; 59.04914; 59.08553; 63.04406; 69.06988; 71.08553; 73.06479; 83.08553; 85.10118; 99.11683; 105.09101; 231.23186	57.46; 79.52; 25.98; 100.00; 19.15; 11.03; 54.13; 34.56; 42.96; 11.00; 17.94; 31.06; 21.40; 12.26; 18.09	41.03858; 43.05423; 45.03349; 55.05423; 57.06988; 71.08553	27.16; 98.44; 100.00; 35.24; 84.52; 28.03
584	175.12297	174.1156985	C11H14N2	CCN(CC#N)C1=CC=CC(=C1)C	113027	130.06513; 175.12297	5.86; 100.00	91.05423; 106.06513; 132.08078; 134.09643; 144.08078; 148.11208; 173.10732; 175.12297	12.35; 17.71; 9.19; 16.18; 24.30; 12.66; 12.67; 100.00	55.02907; 56.04948; 57.04472; 65.03858; 79.05423; 81.06988; 91.05423; 93.06988; 106.06513; 118.06513; 120.08078; 130.06513; 131.06037; 132.08078	9.99; 4.56; 5.38; 8.69; 17.68; 15.76; 100.00; 10.13; 24.90; 13.38; 6.33; 6.81; 6.30; 5.20
585	90.09134	89.08406397	C4H11NO	CCNCCO	8072	72.08078; 90.09134	100.00; 26.20	44.04948; 72.08078	16.55; 100.00	44.04948; 45.03349; 58.06513	100.00; 77.23; 53.20
586	121.08592	120.0786442	C5H12O3	CC(CO)(CO)CO	6502	73.06479; 85.06479; 89.05971; 103.07536; 121.08592	31.48; 33.69; 26.85; 100.00; 40.12	71.04914; 73.06479; 75.08044; 85.06479; 103.07536	36.04; 100.00; 18.97; 27.70; 33.07	57.03349; 71.04914; 73.06479; 87.04406	35.80; 100.00; 39.68; 11.99
587	201.0313	200.0240218	C9H9ClO3	CC(C(=O)O)OC1=CC(=CC=C1)Cl	7542	129.01017; 155.02582	100.00; 13.61	55.01784; 101.01525; 129.01017; 155.02582; 201.03130	8.74; 10.58; 100.00; 28.77; 19.93	43.01784; 45.03349; 69.03349; 98.99960; 101.01525; 105.03349; 110.99960; 113.01525; 119.04914; 126.99452; 129.01017; 155.02582	94.01; 100.00; 25.75; 49.13; 58.72; 14.52; 49.06; 34.51; 75.19; 24.43; 55.49; 25.74
588	285.01845	284.0111765	C11H12N2OS3	C1COCCN1SSC2=NC3=CC=CC=C3S2	7231	197.95004; 285.01845	26.78; 100.00	167.99362; 197.95004; 285.01845	18.01; 45.06; 100.00	47.99025; 51.02293; 71.04914; 76.02155; 77.03858; 79.96232; 84.04439; 90.00081; 92.01646; 107.99362; 116.01646; 117.97797; 118.03211; 124.02155; 126.03720; 165.97797; 167.99362; 197.95004; 212.96094; 255.00789; 285.01845; 0.0065446	14.52; 9.85; 16.64; 11.11; 7.67; 7.27; 13.67; 26.98; 10.72; 6.98; 11.91; 27.67; 17.22; 100.00; 12.28; 86.44; 28.86; 16.17; 8.37; 7.54; 7.02; 0.0040533
589	180.13829	179.1310142	C11H17NO	CCN(CCO)C1=CC=CC(=C1)C	7067	162.12773; 180.13829	19.77; 100.00	106.06513; 132.08078; 134.09643; 162.12773; 180.13829	15.06; 10.25; 53.03; 100.00; 60.92	65.03858; 79.05423; 81.06988; 91.05423; 93.06988; 106.06513; 118.06513; 120.08078; 134.09643	5.54; 6.99; 7.56; 100.00; 15.83; 11.27; 5.16; 11.68; 21.38
590	217.15869	216.1514153	C15H20O	CCCCCCC(=CC1=CC=CC=C1)C=O	7585	91.05423; 115.05423; 117.06988; 131.04914; 133.06479; 145.06479; 147.08044; 199.14813; 217.15869	13.07; 4.73; 9.99; 12.24; 7.99; 5.51; 12.62; 26.34; 100.00	43.05423; 55.05423; 57.06988; 79.05423; 81.06988; 89.03858; 91.05423; 93.06988; 95.08553; 103.05423; 105.06988; 107.08553; 115.05423; 117.06988; 129.03349; 131.04914; 133.06479; 159.11683; 199.14813; 217.15869	4.80; 4.27; 4.16; 6.77; 2.71; 3.24; 100.00; 18.36; 4.64; 15.01; 5.07; 5.82; 10.42; 15.68; 2.63; 11.19; 6.10; 2.95; 4.06; 6.07	43.05423; 55.05423; 65.03858; 75.02293; 79.05423; 81.06988; 83.04914; 91.05423; 93.06988; 97.10118; 103.05423; 105.03349; 105.06988; 115.05423; 117.06988; 119.08553; 129.03349; 131.04914; 131.08553; 133.06479; 143.08553; 145.10118; 147.08044; 159.11683	20.88; 8.14; 12.59; 5.44; 23.70; 5.73; 6.49; 100.00; 8.60; 5.29; 32.75; 5.42; 11.11; 26.49; 20.70; 5.44; 22.10; 9.67; 8.34; 8.14; 12.96; 12.06; 5.83; 5.59
591	234.05833	233.0510498	C12H11NO2S	C1=CC=C(C=C1)S(=O)(=O)C2=CC=CC=C2N	77956	79.05423; 234.05833	1.98; 100.00	156.01138; 234.05833	23.10; 100.00	51.02293; 65.03858; 77.03858; 92.04948	7.47; 100.00; 6.22; 60.21
592	255.08381	254.0765362	C16H14OS	CC(C)C1=CC2=C(C=C1)SC3=CC=CC=C3C2=O	79633	213.03686; 255.08381	9.33; 100.00	253.06816; 255.08381	18.04; 100.00	77.03858; 79.05423; 117.06988; 119.08553; 161.00556; 163.02121; 175.02121; 185.00556; 187.02121; 199.02121; 213.03686; 215.05251; 225.07325; 227.05251; 227.08890; 229.06816; 237.07325; 239.05251; 253.06816; 255.08381	28.93; 17.80; 34.65; 17.33; 10.49; 29.42; 32.74; 10.99; 100.00; 10.54; 16.31; 16.49; 12.93; 8.68; 20.68; 31.34; 9.55; 39.20; 23.76; 12.80
593	124.07569	123.0684139	C7H9NO	C1=CN=CC=C1CCO	72921	80.04948; 92.04948; 106.06513; 124.07569	40.68; 32.64; 83.87; 100.00	78.03383; 79.05423; 80.04948; 92.04948; 94.06513; 106.06513	11.11; 30.31; 23.71; 69.81; 14.23; 100.00	53.03858; 65.03858; 77.03858; 78.03383; 79.05423; 80.04948; 92.04948; 106.06513	42.11; 32.31; 84.13; 63.86; 100.00; 42.65; 59.06; 50.69
594	118.12264	117.1153641	C6H15NO	CC(C)(C)NCCO	78361	57.06988; 62.06004; 74.09643; 118.12264	96.58; 100.00; 46.69; 44.33	44.04948; 57.06988; 62.06004	100.00; 69.97; 66.43	41.03858; 57.06988	18.78; 100.00
595	186.14885	185.1415788	C10H19NO2	CC(=C)C(=O)OCCNC(C)(C)C	19601	57.06988; 69.03349; 74.09643; 87.04406; 98.09643; 100.11208; 113.05971; 130.08626; 186.14886	93.34; 54.53; 44.54; 72.27; 26.16; 33.18; 100.00; 45.73; 88.93	41.03858; 44.04948; 57.06988; 60.04439; 69.03349; 87.04406; 100.11208; 101.05971; 112.07569; 113.05971; 128.07060; 130.08626	37.56; 75.22; 84.42; 40.99; 89.91; 21.92; 24.07; 22.77; 24.88; 65.57; 100.00; 38.12	41.03858; 57.06988; 69.03349; 71.04914	78.71; 100.00; 20.02; 16.11
596	238.97659	237.9693117	C9H6N2S3	C1=CC=C2C(=C1)N=C(S2)SCSC#N	30692	179.99362; 238.97659	9.99; 100.00	179.99362; 238.97659	100.00; 34.63	44.97935; 65.03858; 71.99025; 109.01065; 111.02630; 124.02155; 136.02155; 159.93439; 165.97797; 167.99362; 179.99362; 186.94529; 209.95004	33.02; 30.05; 61.90; 24.70; 29.55; 52.76; 30.09; 30.49; 100.00; 22.99; 33.16; 29.72; 36.19
597	242.00932	241.0020487	C7H6F3NO3S	C1=CC=C(C(=C1)OC(F)(F)F)S(=O)(=O)N	2777208	224.98278; 242.00933	13.23; 100.00	224.98278; 242.00933	32.87; 100.00	39.02293; 51.02293; 53.03858; 63.02293; 65.03858; 66.99900; 78.00081; 78.98483; 79.98008; 87.00523; 90.00081; 102.98483; 123.00523; 126.98483; 129.99573; 132.01138; 132.98958; 144.01138; 147.00523; 149.02088; 156.01138; 161.02088; 172.00629; 189.97803; 222.00310; 223.99876; 224.98278; 242.00933	21.98; 19.40; 7.00; 35.23; 38.58; 12.28; 12.91; 12.31; 6.97; 7.81; 7.42; 8.48; 17.55; 7.89; 7.15; 6.82; 13.41; 17.40; 6.35; 16.44; 10.82; 7.62; 8.89; 6.96; 15.47; 23.04; 100.00; 22.01
598	216.07858	215.0713064	C10H14ClNO2	C1=CC(=CC(=C1)Cl)N(CCO)CCO	66688	198.06802; 216.07858	8.73; 100.00	154.04180; 180.05745; 198.06802	100.00; 36.30; 72.74	45.03349; 60.04439; 74.06004; 79.05423; 89.01525; 98.99960; 101.01525; 110.99960; 113.01525; 115.03090; 116.07060; 117.04655; 119.06220; 128.02615; 134.06004; 136.07569; 140.02615; 152.02615; 154.04180; 156.05745; 168.05745; 170.03672; 180.05745	20.15; 18.59; 7.58; 9.35; 9.00; 8.38; 10.62; 30.59; 46.04; 17.73; 6.39; 22.01; 10.94; 8.72; 5.88; 23.93; 27.82; 13.87; 100.00; 8.78; 10.52; 6.72; 7.16
599	169.03515	168.027872	C5H12O2S2	C(CSCSCCO)O	94785	45.03349; 61.01065; 73.01065; 77.00556; 79.02121; 91.02121; 125.00893; 137.00893; 151.02458; 169.03515	38.74; 55.46; 30.96; 26.34; 57.60; 54.83; 22.82; 100.00; 25.95; 58.05	46.99500; 61.01065; 78.96707; 79.02121; 91.02121	83.33; 67.56; 100.00; 50.22; 61.78	45.03349; 46.99500; 58.99500; 61.01065; 77.00556	40.75; 78.73; 31.54; 100.00; 27.59
600	251.1853	250.1780239	C12H26O5	CCC(CO)(CO)COCC(CC)(CO)CO	90038	87.08044; 89.09609; 103.07536; 105.09101; 117.09101; 135.10157; 203.16417; 215.16417; 233.17474; 251.18530	19.93; 14.47; 15.97; 13.96; 24.20; 51.90; 22.36; 38.78; 100.00; 82.92	73.06479; 87.08044; 99.08044; 101.09609; 103.07536; 105.05462; 105.09101; 107.07027; 117.09101; 135.10157	18.58; 100.00; 19.79; 11.02; 19.73; 19.37; 66.66; 15.33; 41.14; 17.25	29.03858; 73.06479; 85.06479; 87.04406; 87.08044; 89.05971; 101.09609; 103.07536; 105.05462; 115.07536; 117.09101	12.17; 8.17; 10.39; 6.88; 100.00; 19.02; 30.63; 23.97; 7.27; 5.18; 19.86
601	302.30536	301.2980795	C18H39NO2	CCCCCCCCCCCCCCN(CCO)CCO	12942137	43.05423; 57.06988; 118.08626; 197.22638; 284.29479; 302.30536	2.57; 6.42; 2.39; 2.50; 68.27; 100.00	41.03858; 43.05423; 57.06988; 59.08553; 71.08553; 74.06004; 85.10118; 102.09134; 118.08626; 128.10699; 130.12264; 139.14813; 141.16378; 142.12264; 144.13829; 146.15394; 155.17943; 183.21073; 197.22638; 230.21146; 240.26858; 244.22711; 258.24276; 258.27914; 266.28423; 270.27914; 284.29479; 302.30536	3.16; 12.56; 32.25; 6.61; 8.17; 7.84; 4.37; 6.24; 8.34; 3.97; 5.12; 7.10; 5.12; 5.88; 4.47; 8.35; 6.51; 4.32; 7.59; 3.62; 4.77; 4.55; 3.54; 9.14; 10.33; 16.14; 100.00; 84.44	41.03858; 43.05423; 45.03349; 55.05423; 57.06988; 59.08553; 71.08553; 74.06004; 88.07569; 102.09134; 114.09134; 116.10699; 118.08626; 128.10699; 130.12264; 132.10191; 142.12264; 272.29479	17.86; 77.29; 49.26; 11.40; 100.00; 13.03; 21.53; 11.86; 14.73; 15.66; 10.44; 58.51; 8.62; 8.53; 15.38; 9.60; 11.38; 8.82
602	237.18088	236.1736073	C10H24N2O4	C(CN(CCO)CCO)N(CCO)CCO	67322	219.17032; 237.18088	100.00; 92.60	88.07569; 102.09134; 114.09134; 132.10191; 219.17032; 237.18088	26.35; 72.54; 36.44; 100.00; 31.27; 34.38	45.03349; 60.04439; 88.07569; 114.09134; 132.10191	100.00; 13.42; 46.18; 21.62; 43.50
603	266.97409	265.966813	C10H9Cl3O2	CC(=O)OC(C1=CC=CC=C1)C(Cl)(Cl)Cl	7007	224.96352; 266.97409	5.42; 100.00	206.95296; 224.96352; 266.97409	70.10; 27.53; 100.00	43.01784; 65.03858; 77.03858; 79.05423; 105.03349; 107.04914; 116.90601; 131.04914; 144.90092; 146.91657; 149.05971; 152.95046; 170.97628; 188.92714; 206.95296; 240.95844; 248.96352	85.23; 19.73; 25.93; 20.41; 28.36; 25.85; 22.75; 100.00; 15.54; 14.35; 14.23; 47.77; 95.47; 24.55; 79.09; 18.65; 13.65
604	161.92747	160.920197	C2H2Cl3NO	C(=O)(C(Cl)(Cl)Cl)N	61144	116.90601; 161.92747	0.75; 100.00	144.90092; 161.92747	1.92; 100.00	82.94498; 116.90601; 144.90092	40.91; 100.00; 28.58
605	101.02088	100.0135992	C2H3F3O	C(C(F)(F)F)O	6409	83.01031; 101.02088	6.31; 100.00	81.01465; 101.02088	78.88; 100.00	51.00408; 63.00408; 81.01465	100.00; 45.63; 85.45
606	638.54351	637.53624	C12H4Br6O	C1=C(C(=CC(=C1Br)Br)Br)OC2=CC(=C(C=C2Br)Br)Br	155166	534.61735; 638.54351	0.11; 100.00	534.61735; 638.54351	3.00; 100.00	298.77011; 532.60170; 534.61735; 638.54351	26.76; 34.48; 65.27; 100.00
607	358.85169	357.844416	C12H4Cl6	C1=C(C(=CC(=C1Cl)Cl)Cl)C2=CC(=C(C=C2Cl)Cl)Cl	37034	296.85936; 358.85169	0.06; 100.00	298.87501; 358.85169	0.66; 100.00	250.89834; 298.87501; 358.85169	52.83; 29.53; 100.00
608	560.633	559.62573	C12H5Br5O	C1=CC(=C(C=C1Br)Br)OC2=CC(=C(C=C2Br)Br)Br	36159	454.69119; 560.63300	0.26; 100.00	456.70684; 560.63300	2.00; 100.00	298.77011; 350.76503; 352.78068; 364.78068; 376.78068; 454.69119; 456.70684; 560.63300	34.77; 48.74; 42.95; 32.13; 33.63; 42.02; 75.65; 100.00
609	220.1116	219.1043273	C6H21N3Si3	C[Si]1(N[Si](N[Si](N1)(C)C)(C)C)C	66094	145.06118; 220.11160	0.08; 100.00	72.02640; 74.04205; 89.05295; 91.06860; 203.08505; 220.11160	28.09; 68.07; 26.52; 23.67; 24.79; 100.00	57.01550; 72.02640; 74.04205	59.06; 100.00; 57.78
610	482.72249	481.71522	C12H6Br4O	C1=CC(=C(C=C1Br)Br)OC2=C(C=C(C=C2)Br)Br	95170	376.78068; 482.72249	0.52; 100.00	378.79633; 482.72249	0.90; 100.00	220.85960; 250.87017; 272.85452; 274.87017; 286.87017; 298.87017; 352.78068; 376.78068; 378.79633; 400.78068; 482.72249	23.13; 46.14; 100.00; 72.59; 30.68; 26.33; 28.35; 24.69; 49.10; 22.30; 54.42
611	247.0601	246.0528234	C13H10O5	C1=CC(=C(C=C1O)O)C(=O)C2=C(C=C(C=C2)O)O	8571	137.02332; 247.06010	26.54; 100.00	92.99711; 109.02841; 111.04406; 137.02332; 201.05462; 247.06010	9.31; 26.15; 12.58; 100.00; 11.73; 76.73	39.02293; 41.03858; 67.01784; 68.99711; 69.03349; 71.01276; 81.03349; 83.04914; 95.01276; 109.02841; 137.02332; 157.02841; 201.01824; 201.05462	13.45; 18.44; 33.27; 12.36; 17.24; 27.05; 86.71; 20.95; 11.52; 34.56; 100.00; 21.26; 19.34; 19.05
612	145.12231	144.1150297	C8H16O2	CC1(C(C(C1O)(C)C)O)C	76382	127.11174; 145.12231	91.05; 100.00	41.03858; 43.05423; 55.05423; 71.04914; 73.06479; 85.06479; 127.11174; 145.12231	47.63; 100.00; 68.50; 79.86; 95.60; 25.47; 45.74; 23.59	41.03858; 43.05423; 55.05423; 71.04914	95.89; 100.00; 20.05; 16.36
613	141.09101	140.0837296	C8H12O2	CC1(C(=O)C(C1=O)(C)C)C	13617	113.09609; 141.09101	54.72; 100.00	41.03858; 43.05423; 71.04914; 95.08553; 113.09609; 141.09101	33.24; 63.91; 100.00; 65.71; 55.48; 30.53	41.03858; 43.05423; 71.04914; 95.08553	100.00; 29.88; 12.32; 34.19
614	222.94787	221.940598	C8H5Cl3O	C1=CC(=C(C=C1Cl)Cl)C(=O)CCl	20250	204.93731; 222.94787	2.20; 100.00	186.97120; 222.94787	32.21; 100.00	41.00219; 62.99960; 74.96322; 76.97887; 84.98395; 100.97887; 126.99452; 144.96063; 168.96063; 172.95555; 186.97120; 202.92166; 204.93731; 220.93222; 222.94787	19.34; 20.98; 12.42; 18.35; 11.57; 24.77; 13.26; 18.73; 14.41; 36.86; 97.13; 10.85; 100.00; 43.83; 18.07
615	147.13796	146.1306798	C8H18O2	CC(C)C(C(C)(C)CO)O	8946	43.05423; 73.06479; 89.09609; 97.10118; 101.13248; 111.11683; 129.12739; 147.13796	21.52; 40.66; 48.67; 37.17; 25.04; 40.05; 100.00; 37.96	43.05423; 55.05423; 57.06988; 73.06479; 75.08044; 87.08044; 97.10118; 99.11683; 105.09101; 111.11683; 129.12739	50.01; 81.63; 46.83; 100.00; 31.47; 23.34; 21.39; 20.82; 23.24; 19.57; 35.67	41.03858; 43.05423; 55.05423; 57.06988	63.55; 72.67; 100.00; 26.42
616	287.22169	286.2144094	C16H30O4	CC(C)C(C(C)(C)COC(=O)C(C)C)OC(=O)C(C)C	23284	71.04914; 97.10118; 111.11683; 113.13248; 127.11174; 143.10666; 199.16926; 217.17982; 269.21112; 287.22169	13.70; 28.77; 90.07; 18.34; 31.21; 15.48; 85.24; 30.46; 12.14; 100.00	43.05423; 55.05423; 57.06988; 71.04914; 73.06479; 89.05971; 97.10118; 99.04406; 101.05971; 111.11683; 113.13248; 127.11174; 129.12739; 143.10666; 145.12231; 199.16926	50.57; 23.35; 15.60; 100.00; 10.45; 16.73; 12.75; 8.71; 25.12; 48.48; 23.42; 15.23; 16.96; 8.74; 11.28; 28.31	41.03858; 43.05423; 55.05423; 57.06988; 69.03349; 71.04914; 73.06479; 75.08044; 89.05971; 97.10118; 99.11683; 101.05971; 111.11683; 115.11174; 125.09609; 127.11174; 129.12739; 131.14304; 141.09101; 143.10666; 145.12231; 147.13796	10.19; 58.96; 10.95; 13.56; 9.04; 100.00; 28.89; 17.87; 9.25; 15.32; 17.22; 21.90; 13.43; 8.72; 7.82; 19.81; 23.56; 9.27; 8.95; 14.39; 25.24; 14.32
617	217.17982	216.1725446	C12H24O3	CC(C)C(C(C)(C)COC(=O)C(C)C)O	6490	43.05423; 71.04914; 89.05971; 97.10118; 99.11683; 111.11683; 113.13248; 115.11174; 129.12739; 131.14304; 217.17982	12.41; 9.15; 9.22; 100.00; 10.38; 31.11; 17.67; 50.74; 28.71; 10.33; 21.84	43.05423; 55.05423; 57.06988; 71.04914; 73.06479; 101.05971; 111.11683; 129.12739	49.35; 20.57; 45.23; 65.08; 100.00; 8.64; 11.96; 18.18	41.03858; 43.05423; 55.05423; 57.03349; 57.06988; 71.04914; 73.06479; 75.08044; 101.05971	19.27; 100.00; 46.91; 11.83; 55.01; 79.82; 31.14; 10.25; 14.70
618	115.14813	114.1408506	C8H18	CC(C)CC(C)(C)C	10907	43.05423; 57.06988; 115.14813	46.92; 100.00; 32.53	41.03858; 57.06988; 59.08553	11.36; 100.00; 17.03	41.03858; 57.06988	100.00; 93.74
619	355.19039	354.1831093	C22H26O4	CC(C)C(C(C)(C)COC(=O)C1=CC=CC=C1)OC(=O)C2=CC=CC=C2	107080	105.03349; 111.11683; 177.09101; 191.10666; 231.13796; 233.15361; 355.19039	100.00; 20.99; 35.28; 12.96; 61.24; 93.63; 59.86	55.05423; 57.06988; 79.05423; 105.03349; 111.11683; 123.04406; 127.11174; 129.12739; 135.04406; 137.05971; 177.09101; 191.10666; 193.12231; 215.10666; 233.15361	27.00; 13.85; 20.88; 100.00; 34.66; 9.37; 14.70; 8.14; 8.26; 7.86; 11.55; 21.79; 7.96; 10.38; 17.27	57.06988; 77.03858; 79.05423; 95.08553; 97.10118; 105.03349; 107.04914; 111.11683; 125.09609	13.91; 15.42; 14.96; 4.14; 12.59; 100.00; 15.58; 5.65; 5.55
620	320.95143	319.944159	C12H8Cl4N2	C1=C(C(=CC(=C1Cl)N)Cl)C2=CC(=C(C=C2Cl)N)Cl	27465	284.97476; 320.95144	0.93; 100.00	284.97476; 320.95144	13.24; 100.00	138.01050; 171.97153; 197.98718; 231.94821; 257.96386; 284.97476	13.85; 48.07; 29.10; 18.46; 57.34; 100.00
621	364.96642	363.95914	C15H12Cl4O2	CC(C)(C1=CC(=C(C(=C1)Cl)O)Cl)C2=CC(=C(C(=C2)Cl)O)Cl	6619	203.00250; 364.96642	39.82; 100.00	167.02582; 203.00250; 328.98974; 364.96642	7.24; 31.14; 13.43; 100.00	113.01525; 138.99452; 141.01017; 200.98685; 203.00250; 210.97120; 227.00250; 229.01815; 246.98426; 253.01815; 270.94787; 274.97917; 286.97917; 288.99482; 328.98974; 334.95585	49.76; 13.81; 19.85; 100.00; 21.35; 20.34; 18.78; 20.57; 29.63; 68.48; 17.09; 30.25; 12.18; 18.29; 12.03; 18.93
622	158.15394	157.1466642	C9H19NO	CC1(CC(CC(N1)(C)C)O)C	75471	58.06513; 60.08078; 99.08044; 116.10699; 118.12264; 140.14338; 158.15394	43.61; 6.81; 5.65; 11.51; 7.51; 25.45; 100.00	41.03858; 43.05423; 55.05423; 56.04948; 57.06988; 58.06513; 60.08078; 83.08553; 96.08078; 98.09643; 100.11208; 116.10699; 140.14338; 158.15394	10.97; 6.85; 13.94; 12.72; 9.12; 100.00; 10.21; 7.24; 8.37; 9.03; 9.54; 7.81; 11.67; 5.81	41.03858; 43.05423; 55.05423; 56.04948; 57.06988; 58.06513; 67.05423; 81.06988; 83.08553; 124.11208	19.93; 11.50; 36.54; 13.49; 8.42; 100.00; 9.58; 28.41; 15.62; 10.81
623	156.13829	155.1310142	C9H17NO	CC1(CC(=O)CC(N1)(C)C)C	13220	58.06513; 156.13829	100.00; 54.57	41.03858; 55.05423; 56.04948; 57.03349; 58.06513; 81.06988; 96.08078; 98.09643; 114.09134; 138.12773	15.77; 7.18; 16.38; 6.92; 100.00; 16.13; 10.66; 11.14; 6.66; 8.38	39.02293; 41.03858; 42.03383; 55.05423; 56.04948; 58.06513; 79.05423; 122.09643; 140.10699	16.34; 70.74; 12.92; 45.11; 23.53; 100.00; 24.54; 11.19; 10.81
624	157.16992	156.1626486	C9H20N2	CC1(CC(CC(N1)(C)C)N)C	37524	140.14338; 157.16993	69.55; 100.00	56.04948; 58.06513; 60.08078; 83.08553; 84.08078; 98.09643; 100.11208; 115.12297; 124.11208; 140.14338; 157.16993	10.85; 100.00; 9.64; 9.54; 9.76; 20.39; 21.01; 10.21; 5.94; 30.48; 12.53	41.03858; 44.04948; 55.05423; 56.04948; 58.06513; 74.09643; 81.06988; 98.09643	14.03; 7.37; 28.85; 37.46; 100.00; 8.45; 8.96; 14.12
625	163.1441	162.1368278	C7H18N2O2	C(CN)CN(CCO)CCO	21088	116.10699; 128.10699; 146.11756; 163.14410	52.39; 30.51; 95.52; 100.00	73.07602; 74.06004; 101.10732; 102.09134; 116.10699; 118.08626; 119.11789; 128.10699; 145.13354; 146.11756; 163.14410	31.14; 47.73; 26.97; 100.00; 22.62; 42.19; 40.60; 81.47; 31.54; 57.43; 37.55	30.03383; 44.04948; 45.03349; 47.04914; 58.06513; 72.04439; 73.07602; 74.06004; 87.09167; 88.07569; 100.07569; 101.10732; 102.09134; 114.09134; 116.10699; 128.10699; 131.11789	12.06; 12.14; 100.00; 12.46; 16.05; 11.72; 29.95; 28.63; 46.67; 16.29; 8.13; 7.76; 18.13; 23.82; 35.06; 20.08; 8.95
626	199.09648	198.0892089	C10H14O4	C1=CC(=CC=C1OCCO)OCCO	66912	109.02841; 137.05971; 199.09649	12.26; 12.45; 100.00	45.03349; 63.04406; 95.04914; 109.02841; 137.05971; 139.07536; 155.07027; 181.08592; 199.09649	78.69; 23.37; 17.99; 41.25; 62.33; 12.16; 37.26; 10.21; 100.00	45.03349; 51.02293; 53.03858; 81.03349; 83.04914; 95.04914; 97.06479; 109.02841; 111.04406; 121.06479; 123.04406; 135.04406; 137.05971	18.09; 20.07; 10.63; 9.45; 10.55; 44.05; 15.37; 100.00; 37.57; 11.51; 15.16; 10.10; 36.07
627	199.09648	198.0892089	C10H14O4	C1=CC(=CC(=C1)OCCO)OCCO	66885	111.04406; 137.05971; 155.07027	61.64; 100.00; 62.06	45.03349; 63.04406; 65.03858; 95.04914; 111.04406; 121.06479; 123.04406; 137.05971; 139.07536; 155.07027; 181.08592; 197.08084; 199.09649	100.00; 28.39; 14.64; 17.15; 43.17; 40.70; 16.08; 92.64; 46.00; 26.88; 19.83; 20.81; 91.34	39.02293; 45.03349; 51.02293; 65.03858; 79.05423; 81.03349; 81.06988; 95.04914; 97.06479; 111.04406; 113.05971; 119.04914; 121.06479; 123.04406; 125.05971; 135.04406; 137.05971; 153.05462	23.43; 63.42; 35.82; 50.61; 46.36; 19.76; 36.17; 74.92; 26.39; 69.97; 22.08; 27.94; 34.27; 38.61; 21.92; 24.76; 100.00; 18.79
628	257.17474	256.1674592	C14H24O4	C1CC(CCC1COCC2CO2)COCC3CO3	61718	109.10118; 183.13796; 239.16417; 257.17474	13.65; 15.92; 30.13; 100.00	57.03349; 59.04914; 75.04406; 95.08553; 97.10118; 101.05971; 109.10118; 111.11683; 127.07536; 183.13796; 239.16417; 257.17474	25.62; 6.99; 5.69; 13.91; 13.67; 5.34; 28.25; 13.43; 6.53; 24.92; 18.15; 100.00	43.01784; 57.03349; 69.03349; 95.08553; 97.10118; 109.10118; 111.11683; 125.09609; 127.07536; 127.11174; 129.09101; 139.11174; 153.12739; 167.14304; 183.13796; 185.15361; 201.14852; 241.14344	62.24; 100.00; 22.85; 35.49; 40.42; 19.12; 17.94; 24.65; 43.61; 27.83; 22.46; 38.83; 29.21; 97.59; 29.52; 46.23; 16.09; 13.02
629	149.12845	148.1211778	C6H16N2O2	C(COCCOCCN)N	70248	44.04948; 62.06004; 88.07569; 132.10191; 149.12845	79.95; 49.74; 41.93; 100.00; 95.39	44.04948; 45.03349; 59.04914; 62.06004; 71.04914; 88.07569	100.00; 18.90; 6.41; 20.09; 17.92; 36.44	44.04948; 45.03349; 60.04439; 62.06004; 71.04914; 88.07569	100.00; 18.23; 10.47; 17.58; 9.36; 10.03
630	183.0508	182.043522	C6H14O2S2	C(COCCS)OCCS	84733	61.01065; 105.03686; 149.06308; 183.05080	100.00; 49.87; 19.96; 45.69	45.03349; 59.04914; 61.01065; 61.02841; 79.02121; 89.05971; 105.03686; 123.04743	69.80; 11.99; 100.00; 28.07; 30.49; 12.93; 23.46; 10.99	34.99500; 45.03349; 46.99500; 57.03349; 59.04914; 61.01065; 73.06479; 75.04406; 105.03686	10.00; 53.15; 32.88; 8.83; 9.26; 100.00; 10.76; 11.18; 10.85
631	193.14477	192.1374965	C10H16N4	CCC(C)(C#N)N=NC(C)(CC)C#N	93079	97.07602; 112.08692; 193.14477	29.94; 9.57; 100.00	54.03383; 55.05423; 80.04948; 82.06513; 85.07602; 95.06037; 97.07602; 112.08692; 138.10257; 166.13387; 193.14477	8.92; 45.92; 42.51; 100.00; 16.51; 12.24; 10.83; 24.20; 12.41; 9.19; 82.30	52.01818; 54.03383; 55.05423; 56.04948; 65.03858; 66.03383; 78.03383; 80.02432; 80.04948; 82.03997; 82.06513; 84.08078	37.58; 69.09; 100.00; 58.27; 17.43; 19.56; 22.10; 19.21; 27.80; 13.05; 95.54; 13.14
632	157.07602	156.0687483	C10H8N2	C1=CC=NC(=C1)C2=CC=CC=N2	1474	128.04948; 157.07602	1.97; 100.00	130.06513; 157.07602	31.24; 100.00	63.02293; 75.02293; 78.03383; 80.04948; 92.04948; 103.05423; 104.04948; 105.04472; 113.03858; 116.04948; 128.04948; 130.06513; 140.04948; 155.06037	72.38; 19.59; 17.73; 19.49; 25.35; 68.75; 65.16; 18.44; 63.51; 50.96; 34.46; 100.00; 39.18; 28.56
633	267.0338	266.0265204	C14H12Cl2O	C1=CC(=CC=C1C(CO)C2=CC=C(C=C2)Cl)Cl	17533	249.02323; 267.03380	100.00; 24.51	137.01525; 249.02323	9.24; 100.00	113.01525; 137.01525; 199.03090; 213.04655; 235.00758; 247.00758; 249.02323	17.35; 17.63; 14.82; 51.07; 100.00; 13.96; 34.67
634	316.98974	315.982463	C14H11Cl3O2	C1=CC(=CC=C1C(C2=CC=C(C=C2)O)C(Cl)(Cl)Cl)O	76302	95.04914; 316.98974	1.05; 100.00	95.04914; 316.98974	18.38; 100.00	51.02293; 53.03858; 65.03858; 93.03349; 105.03349; 145.06479; 155.04914; 169.06479; 171.08044; 181.06479; 190.92166; 192.93731; 197.05971; 199.07536; 220.93222; 222.94787; 245.03638; 260.96352; 272.96352	18.24; 9.62; 31.74; 8.98; 39.10; 18.47; 15.60; 15.82; 100.00; 24.85; 21.07; 9.70; 15.33; 12.44; 17.98; 15.08; 12.10; 9.74; 19.10
635	215.16417	214.1568946	C12H22O3	CCC(CO)(COCC=C)COCC=C	61196	41.03858; 59.04914; 71.04914; 85.06479; 87.08044; 99.08044; 101.09609; 103.07536; 103.11174; 115.07536; 117.09101; 127.11174; 131.10666; 133.08592; 135.10157; 143.10666; 145.12231; 147.13796; 155.10666; 157.12231; 171.10157; 173.11722; 175.13287; 215.16417	34.99; 64.21; 23.03; 24.97; 39.24; 37.18; 44.19; 33.84; 23.31; 20.09; 43.21; 56.48; 15.04; 31.28; 15.57; 15.35; 23.81; 14.38; 25.63; 100.00; 15.78; 26.03; 49.25; 78.39	41.03858; 43.05423; 57.03349; 59.04914; 71.04914; 73.06479; 83.04914; 85.06479; 87.08044; 97.06479; 99.08044; 101.09609; 103.07536; 113.09609; 117.09101; 123.08044; 125.09609; 127.11174; 131.10666; 139.07536; 139.11174; 143.10666; 145.12231; 157.12231; 215.16417	100.00; 20.31; 38.40; 66.69; 55.27; 30.69; 10.96; 32.08; 20.02; 9.30; 22.17; 8.51; 9.73; 9.51; 16.13; 16.46; 14.85; 21.59; 9.74; 15.57; 8.23; 11.41; 9.39; 25.28; 11.38	41.03858; 43.05423; 59.04914; 71.04914; 73.06479; 85.06479; 87.08044; 123.08044; 125.09609; 127.11174	100.00; 95.78; 11.01; 18.09; 11.05; 10.89; 22.13; 18.14; 10.70; 15.47
636	399.09643	398.0891521	C15H26O6S3	CCC(COC(=O)CCS)(COC(=O)CCS)COC(=O)CCS	118379	89.00556; 171.04743; 185.06308; 187.07873; 189.09438; 293.08758; 399.09643	14.70; 13.38; 17.03; 35.33; 34.66; 100.00; 54.00	43.01784; 46.99500; 61.01065; 73.01065; 75.02630; 89.00556; 91.02121; 93.03686; 107.01613; 171.04743; 173.06308; 185.06308; 187.07873; 189.09438; 203.07364; 207.10494; 245.08421; 277.05628; 285.11888; 291.07193; 293.08758; 311.09814; 315.12944; 365.10871; 381.08586; 399.09643	20.39; 28.70; 41.46; 19.98; 81.65; 100.00; 30.57; 32.69; 19.42; 23.92; 28.02; 56.75; 82.77; 25.32; 21.99; 25.53; 17.49; 21.02; 23.97; 18.02; 95.67; 25.72; 23.40; 29.30; 16.50; 37.04	46.99500; 75.02630; 89.00556; 91.02121; 107.01613; 171.04743; 173.06308; 175.07873; 185.06308; 187.07873; 189.09438; 191.07364; 191.11003; 201.05799; 203.07364; 205.08929; 207.10494; 209.12059; 225.11551; 285.11888; 293.08758; 313.11379	50.20; 48.70; 29.35; 100.00; 44.41; 27.94; 51.93; 26.64; 22.28; 61.56; 94.90; 24.76; 52.65; 18.81; 66.48; 49.54; 61.21; 42.82; 28.02; 25.48; 59.72; 24.26
637	225.16378	224.1565006	C17H20	CC1=CC=C(C=C1)C(C)(C)C2=CC=C(C=C2)C	264852	91.05423; 131.08553; 133.10118	64.52; 100.00; 92.97	91.05423; 93.06988; 105.06988; 115.05423; 131.08553; 133.10118; 157.10118; 195.11683; 197.13248; 199.14813; 225.16378	100.00; 13.64; 16.63; 20.56; 42.90; 21.09; 55.20; 19.04; 15.00; 96.35; 16.40	55.05423; 67.05423; 77.03858; 79.05423; 91.05423; 103.05423; 131.08553; 133.10118; 141.06988; 147.11683; 157.10118; 195.11683; 199.14813	7.95; 12.00; 27.24; 18.44; 100.00; 10.06; 20.50; 11.63; 35.88; 9.23; 9.21; 10.37; 8.86
638	457.1039	456.0966202	C26H20N2O2S2	C1=CC=C(C=C1)C(=O)NC2=CC=CC=C2SSC3=CC=CC=C3NC(=O)C4=CC=CC=C4	67271	105.03349; 457.10390	10.57; 100.00	105.03349; 228.04776; 457.10390	100.00; 41.70; 62.75	51.02293; 77.03858; 79.05423; 105.03349; 124.02155; 230.06341; 232.02492; 457.10390	7.84; 41.63; 52.20; 100.00; 9.24; 8.00; 10.96; 17.74
639	240.86066	239.85339	C3H2Br2N2O	C(#N)C(C(=O)N)(Br)Br	25059	197.85485; 240.86066	5.79; 100.00	195.83920; 223.83411; 240.86066	13.51; 19.85; 100.00	117.92869; 195.83920	50.38; 100.00
640	127.96645	126.9591691	C2H3Cl2NO	C(C(=O)N)(Cl)Cl	12694	82.94498; 127.96645	5.05; 100.00	82.94498; 127.96645	65.56; 100.00	44.01309; 82.94498	4.86; 100.00
641	223.00758	222.0003056	C12H8Cl2	C1=CC=C(C(=C1)C2=CC=CC=C2Cl)Cl	25622	125.01525; 223.00758	0.82; 100.00	125.01525; 223.00758	2.85; 100.00	101.03858; 125.01525; 134.99960; 137.01525; 161.01525; 163.03090; 170.97628; 220.99193; 223.00758	29.56; 46.49; 41.84; 58.86; 18.19; 23.83; 15.64; 17.63; 100.00
642	112.99193	111.9846556	C3H6Cl2	CC(C)(Cl)Cl	11660	77.01525; 112.99193	26.57; 100.00	77.01525; 112.99193	67.32; 100.00	41.03858; 77.01525	100.00; 55.51
643	275.0914	274.0841235	C15H14O5	COC1=CC(=C(C=C1)C(=O)C2=C(C=C(C=C2)OC)O)O	8570	151.03897; 275.09140	15.59; 100.00	123.04406; 151.03897; 153.05462; 247.09649; 275.09140	15.92; 85.94; 19.18; 7.69; 100.00	67.01784; 81.03349; 83.04914; 95.01276; 107.04914; 109.02841; 111.04406; 121.02841; 123.04406; 125.05971; 137.02332; 151.03897; 153.05462; 171.04406; 189.05462; 195.06519; 219.06519; 221.08084; 247.09649	7.29; 18.58; 7.11; 6.86; 15.79; 6.80; 7.08; 47.15; 45.91; 12.44; 15.09; 100.00; 20.62; 6.96; 13.76; 6.18; 8.86; 10.03; 6.80
644	245.08083	244.0735589	C14H12O4	COC1=CC(=C(C=C1)C(=O)C2=CC=CC=C2O)O	8569	121.02841; 245.08084	26.88; 100.00	79.01784; 93.03349; 95.04914; 105.03349; 121.02841; 123.04406; 151.03897; 245.08084	5.17; 49.07; 7.21; 11.26; 100.00; 14.39; 24.02; 26.99	39.02293; 41.03858; 51.02293; 53.03858; 63.02293; 65.03858; 67.01784; 67.05423; 79.01784; 79.05423; 81.03349; 89.00219; 91.01784; 93.03349; 95.04914; 105.03349; 107.04914; 121.02841; 123.04406; 149.02332; 151.03897; 191.07027; 195.04406	41.32; 10.10; 24.45; 32.68; 10.35; 73.25; 12.13; 11.44; 10.88; 18.11; 19.06; 10.35; 29.23; 57.87; 32.32; 13.22; 21.64; 100.00; 25.77; 24.79; 50.47; 8.64; 7.14
645	215.07027	214.0629942	C13H10O3	C1=CC=C(C(=C1)C(=O)C2=CC=CC=C2O)O	70038	121.02841; 215.07027	11.16; 100.00	93.03349; 121.02841; 215.07027	57.85; 100.00; 22.70	39.02293; 51.02293; 53.03858; 63.02293; 65.03858; 89.00219; 91.01784; 93.03349; 121.02841; 165.03349	40.33; 35.64; 40.24; 17.26; 89.70; 16.42; 38.65; 82.31; 100.00; 13.73
646	257.11722	256.1099444	C16H16O3	COC(C1=CC=CC=C1)(C(=O)C2=CC=CC=C2)OC	90571	195.08044; 197.09609; 225.09101; 257.11722	89.56; 37.53; 100.00; 75.17	105.03349; 121.06479; 149.05971; 151.07536; 195.08044; 257.11722	100.00; 24.98; 16.33; 7.21; 8.32; 9.99	77.03858; 79.05423; 105.03349; 121.06479; 123.08044; 195.08044	18.53; 42.47; 16.71; 100.00; 33.34; 11.72
647	105.09101	104.0837296	C5H12O2	CC(C)(OC)OC	6495	41.03858; 73.06479	71.91; 100.00	41.03858; 43.05423; 73.06479	100.00; 91.89; 88.06	41.03858; 43.05423; 57.03349; 59.04914	100.00; 90.91; 60.54; 78.08
648	164.10699	163.099714	C10H13NO	CC1(CC2=C(O1)C(=CC=C2)N)C	91697	147.08044; 164.10699	11.31; 100.00	97.06479; 106.06513; 108.04439; 122.06004; 146.09643; 148.07569	10.49; 75.26; 35.60; 39.52; 52.16; 7.60	39.02293; 41.03858; 51.02293; 53.03858; 55.05423; 65.03858; 67.05423; 69.06988; 79.05423; 80.04948; 81.03349; 83.04914; 92.04948; 94.06513; 95.08553; 97.06479; 105.03349; 106.06513; 108.04439; 120.04439; 122.06004; 124.07569; 138.09134	46.59; 57.22; 18.68; 48.86; 100.00; 41.54; 15.68; 13.51; 27.34; 58.35; 20.28; 27.05; 14.09; 28.51; 16.72; 19.31; 13.70; 68.28; 46.31; 50.32; 61.24; 21.24; 15.01
649	117.12739	116.1201151	C7H16O	CCC(C(C)(C)C)O	19871	57.06988; 99.11683	100.00; 17.20	41.03858; 43.05423; 57.06988; 59.04914; 99.11683	29.71; 37.47; 100.00; 16.78; 14.29	41.03858; 57.06988	100.00; 89.19
650	87.11683	86.10955045	C6H14	CCC(C)(C)C	6403	57.06988; 87.11683	36.44; 100.00	55.05423; 57.06988; 59.08553; 71.08553; 87.11683	40.79; 100.00; 35.46; 64.88; 28.97	41.03858; 57.06988	100.00; 73.30
651	147.06518	146.0579088	C6H10O4	CC(C)(CC(=O)O)C(=O)O	11701	41.03858; 43.01784; 61.02841; 85.06479; 87.04406; 101.05971; 129.05462; 147.06519	24.73; 30.42; 25.09; 23.35; 45.02; 87.96; 100.00; 80.77	43.01784; 61.02841	100.00; 23.29	41.03858; 43.01784	100.00; 45.18
652	117.09101	116.0837296	C6H12O2	CCC(C)(C)C(=O)O	11684	71.08553; 117.09101	100.00; 30.33	55.05423; 71.08553	61.47; 100.00	41.03858; 55.05423; 69.06988; 71.08553	100.00; 57.90; 73.74; 56.56
653	161.08083	160.0735589	C7H12O4	CC(C)(CCC(=O)O)C(=O)O	12681	69.06988; 71.04914; 89.05971; 97.06479; 99.08044; 115.07536; 143.07027; 161.08084	45.42; 23.07; 20.14; 33.61; 20.75; 100.00; 46.29; 12.93	41.03858; 43.05423; 55.01784; 57.03349; 69.03349; 69.06988; 71.01276; 71.04914; 73.02841; 73.06479; 75.04406; 97.06479; 115.07536	61.24; 28.92; 39.01; 27.22; 12.02; 100.00; 12.57; 33.57; 39.63; 21.08; 36.34; 40.06; 23.29	41.03858; 43.05423; 55.01784; 55.05423; 67.05423; 69.06988	78.93; 20.21; 10.62; 13.63; 15.51; 100.00
654	105.09101	104.0837296	C5H12O2	CC(C)(CO)CO	31344	57.06988; 87.08044; 105.09101	69.30; 100.00; 29.95	55.05423; 57.06988; 59.04914; 73.06479; 75.08044	32.48; 100.00; 19.82; 28.67; 28.44	41.03858; 43.05423; 55.05423; 57.06988	51.01; 40.22; 100.00; 24.53
655	241.14344	240.1361591	C13H20O4	CC(=C)C(=O)OCC(C)(C)COC(=O)C(=C)C	16135	55.05423; 69.03349; 139.07536; 141.09101; 155.10666; 241.14344	19.69; 82.77; 19.98; 55.21; 88.20; 100.00	41.03858; 55.05423; 69.03349; 71.04914; 87.04406; 99.04406; 101.05971; 139.07536; 155.10666	30.79; 18.74; 97.70; 21.95; 20.08; 100.00; 31.98; 20.96; 31.81	41.03858; 43.05423; 55.05423; 69.03349; 71.04914; 87.04406; 99.04406; 101.05971; 141.09101	100.00; 32.63; 31.84; 66.75; 31.05; 53.01; 84.36; 49.23; 26.66
656	103.07536	102.0680796	C5H10O2	CC(C)(C)C(=O)O	6417	57.06988; 103.07536	100.00; 22.13	41.03858; 57.06988	29.18; 100.00	41.03858; 57.06988	24.41; 100.00
657	121.04147	120.0341926	C5H9ClO	CC(C)(C)C(=O)Cl	62493	57.06988; 121.04147	51.76; 100.00	41.03858; 57.06988	27.30; 100.00	41.03858; 57.06988	23.15; 100.00
658	91.0309	90.0236279	C4H7Cl	CC(=CCl)C	10555	55.05423; 91.03090	16.18; 100.00	41.03858; 55.05423; 91.03090	39.94; 40.80; 100.00	39.02293; 41.03858	100.00; 62.93
659	197.13248	196.1252005	C15H16	CC(C)(C1=CC=CC=C1)C2=CC=CC=C2	13065	119.08553; 197.13248	88.54; 100.00	91.05423; 103.05423; 117.06988; 119.08553; 181.10118; 197.13248	70.40; 12.43; 100.00; 58.19; 20.78; 70.12	77.03858; 91.05423; 93.06988; 117.06988; 127.05423; 133.10118; 145.10118; 171.11683; 181.10118; 195.11683	83.53; 60.25; 33.44; 89.32; 56.79; 24.74; 22.78; 100.00; 68.11; 68.26
660	332.96431	331.957033	C14H8N2S4	C1=CC=C2C(=C1)N=C(S2)SSC3=NC4=CC=CC=C4S3	8447	197.95004; 332.96431	3.38; 100.00	197.95004; 332.96431	21.36; 100.00	136.02155; 282.94866; 330.94866; 332.96431	13.82; 20.72; 12.43; 100.00
661	341.24751	340.2402303	C23H32O2	CC1=CC(=C(C(=C1)C(C)(C)C)O)CC2=C(C(=CC(=C2)C)C(C)(C)C)O	8398	227.10666; 229.12231; 285.18491; 341.24751	100.00; 39.89; 44.54; 68.90	39.02293; 41.03858; 55.05423; 57.06988; 119.04914; 121.06479; 123.08044; 135.08044; 145.10118; 147.11683; 149.13248; 159.08044; 161.13248; 163.11174; 175.11174; 177.12739; 179.14304; 255.17434; 267.17434; 285.18491; 313.25259; 341.24751	27.93; 32.25; 100.00; 67.63; 67.92; 65.01; 31.08; 17.00; 36.28; 49.96; 55.72; 42.99; 53.17; 34.02; 78.03; 49.62; 42.79; 16.13; 30.86; 18.06; 29.67; 67.39	41.03858; 53.03858; 55.05423; 57.06988; 65.03858; 67.05423; 73.10118; 81.06988; 119.04914; 121.06479; 123.08044; 145.10118; 147.11683; 149.13248; 159.08044; 161.09609; 161.13248; 171.08044; 173.09609; 201.12739; 203.14304; 225.09101; 227.10666; 231.17434; 239.14304; 241.15869; 255.17434; 265.15869; 267.13796; 267.17434; 269.15361	35.17; 16.26; 11.09; 24.67; 11.80; 42.04; 6.98; 24.43; 100.00; 27.61; 6.45; 45.67; 18.44; 22.16; 32.16; 8.48; 11.97; 11.80; 7.93; 6.65; 16.07; 8.49; 11.29; 8.38; 14.58; 13.82; 7.97; 8.84; 7.25; 6.37; 7.37
662	369.27881	368.2715304	C25H36O2	CCC1=CC(=C(C(=C1)C(C)(C)C)O)CC2=C(C(=CC(=C2)CC)C(C)(C)C)O	6928	43.05423; 57.06988; 133.06479; 253.12231; 255.13796; 257.15361; 311.20056; 369.27881	18.35; 21.77; 15.34; 31.57; 85.18; 16.48; 22.26; 100.00	41.03858; 43.05423; 57.06988; 59.08553; 121.06479; 133.06479; 135.08044; 137.09609; 161.13248; 163.11174; 163.14813; 175.14813; 177.12739; 191.14304; 193.15869; 283.16926; 295.20564; 311.23694; 325.25259; 339.26824; 341.24751; 341.28389; 353.24751; 369.27881	38.79; 25.28; 79.51; 11.23; 14.42; 26.65; 41.32; 20.37; 10.70; 59.27; 22.29; 100.00; 14.78; 15.63; 27.81; 20.49; 11.51; 10.77; 14.17; 7.79; 7.60; 17.94; 9.30; 22.05	41.03858; 55.05423; 57.06988; 63.02293; 65.03858; 67.05423; 79.05423; 121.06479; 129.03349; 131.04914; 133.06479; 135.08044; 137.09609; 161.13248; 185.09609; 197.09609; 253.12231; 255.13796; 255.17434; 257.18999; 267.17434; 269.18999; 271.20564; 279.17434; 281.18999; 283.16926; 283.20564; 293.18999; 295.20564; 297.18491; 353.24751	84.81; 42.28; 31.28; 30.74; 21.55; 36.31; 46.29; 40.04; 100.00; 73.29; 91.70; 54.38; 35.51; 29.46; 32.17; 21.35; 36.23; 29.09; 67.34; 43.87; 36.89; 54.29; 35.71; 25.72; 63.78; 35.07; 36.66; 32.20; 31.65; 43.12; 25.56
663	105.10224	104.094963	C4H12N2O	C(COCCN)N	75982	44.04948; 88.07569	100.00; 65.90	44.04948; 71.04914; 88.07569	100.00; 13.50; 16.55	44.04948; 60.04439	100.00; 9.24
664	155.00174	153.9944638	C4H10S3	C(CSCCS)S	77117	61.01065; 94.99837; 121.01402; 155.00174	66.85; 37.72; 100.00; 46.46	61.01065; 92.98272; 94.99837	100.00; 19.48; 21.05	46.99500; 61.01065; 92.98272	25.93; 100.00; 30.12
665	123.04743	122.0401507	C4H10O2S	C(CSCCO)O	5447	45.03349; 61.01065; 77.00556; 79.02121	30.70; 70.06; 25.28; 100.00	45.03349; 61.01065; 79.02121	34.73; 100.00; 40.97	45.03349; 46.99500; 61.01065	100.00; 32.86; 69.97
666	160.11208	159.1047994	C11H13N	CC1=NC2=CC=CC=C2C1(C)C	15427	118.06513; 160.11208	2.05; 100.00	116.04948; 118.06513; 119.08553; 158.09643; 160.11208	9.99; 10.05; 11.75; 20.94; 100.00	41.03858; 65.03858; 91.05423; 92.04948; 93.06988; 94.06513; 108.08078; 116.04948; 117.06988; 118.06513; 120.08078; 127.05423; 132.08078; 144.08078; 0.19532; 158.09643	33.48; 94.95; 62.67; 41.69; 52.68; 37.73; 35.55; 48.69; 31.88; 100.00; 28.68; 28.25; 50.52; 34.87; 0.15442; 43.91
667	247.0601	246.0528234	C13H10O5	C1=CC(=CC=C1C(=O)C2=C(C(=C(C=C2)O)O)O)O	919792	121.02841; 247.06010	33.25; 100.00	93.03349; 121.02841; 135.00767; 153.01824; 247.06010	89.93; 100.00; 15.20; 19.44; 13.31	55.01784; 65.00219; 65.03858; 67.01784; 69.03349; 79.01784; 91.01784; 93.03349; 95.01276; 105.03349; 121.02841	3.71; 5.98; 14.76; 13.19; 3.49; 4.19; 3.46; 100.00; 4.31; 5.89; 36.98
668	247.0601	246.0528234	C13H10O5	C1=CC(=C(C=C1C(=O)C2=C(C=C(C=C2)O)O)O)O	12472902	137.02332; 247.06010	73.04; 100.00	81.03349; 109.02841; 121.02841; 137.02332; 247.06010	9.90; 21.27; 13.82; 100.00; 22.38	43.01784; 51.02293; 53.03858; 65.00219; 67.01784; 68.99711; 69.03349; 71.01276; 81.03349; 95.01276; 95.04914; 109.02841; 111.04406; 121.02841; 137.02332; 139.03897; 157.02841; 161.02332; 163.03897; 173.02332; 175.03897; 177.05462; 201.05462; 229.04954; 245.04445	8.44; 6.86; 4.85; 5.36; 7.52; 3.87; 6.16; 11.92; 15.70; 10.40; 4.83; 17.51; 7.39; 12.04; 100.00; 7.71; 6.14; 4.36; 5.80; 7.54; 9.81; 6.45; 12.38; 3.77; 9.14
669	331.79232	330.785043	C6Cl7N	C1(=C(C(=NC(=C1Cl)Cl)C(Cl)(Cl)Cl)Cl)Cl	70811	295.81564; 331.79232	0.03; 100.00	295.81564; 331.79232	0.09; 100.00	295.81564; 331.79232	20.87; 100.00
670	230.89325	229.885975	C6H2Cl4O	C1=C(C(=C(C(=C1Cl)Cl)Cl)Cl)O	21013	202.89834; 230.89325	0.43; 100.00	202.89834; 230.89325	2.28; 100.00	118.94498; 154.92166; 202.89834; 230.89325	6.06; 6.98; 7.76; 100.00
671	230.89325	229.885975	C6H2Cl4O	C1=C(C(=C(C(=C1Cl)Cl)Cl)O)Cl	6028	202.89834; 230.89325	0.15; 100.00	202.89834; 230.89325	0.57; 100.00	200.88269; 202.89834; 230.89325	7.51; 7.36; 100.00
672	222.94787	221.940598	C8H5Cl3O	CC(=O)C1=C(C(=C(C=C1)Cl)Cl)Cl	26132	43.01784; 222.94787	3.95; 100.00	204.93731; 222.94787	42.29; 100.00	43.01784; 60.98395; 96.96063; 118.94498; 129.01017; 154.92166; 162.97120; 168.96063; 186.97120; 0.32385); 204.93731; 206.91657; 222.94787	64.36; 41.71; 22.20; 48.27; 20.07; 27.25; 17.10; 59.13; 100.00; ; 48.53; 16.24; 54.73
673	196.93222	195.924948	C6H3Cl3O	C1=CC(=C(C(=C1O)Cl)Cl)Cl	27582	166.92166; 196.93222	1.91; 100.00	168.93731; 196.93222	6.07; 100.00	72.98395; 74.99960; 130.94498; 132.96063; 166.92166; 168.93731; 196.93222	15.57; 24.92; 10.62; 25.65; 40.38; 31.89; 100.00
674	231.06518	230.0579088	C13H10O4	C1=CC=C(C=C1)C(=O)C2=C(C(=C(C=C2)O)O)O	70837	105.03349; 231.06519	19.33; 100.00	79.01784; 105.03349; 153.01824; 213.05462; 231.06519	3.83; 100.00; 4.62; 4.25; 6.61	51.02293; 63.02293; 77.00219; 79.01784; 79.05423; 89.00219; 105.03349	100.00; 25.47; 12.43; 11.84; 85.15; 7.75; 67.54
675	338.81022	337.802945	C8Cl6O2	C1(=C(C(=C(C(=C1Cl)Cl)C(=O)Cl)Cl)Cl)C(=O)Cl	12868	302.83354; 338.81022	0.66; 100.00	302.83354; 338.81022	3.44; 100.00	302.83354; 338.81022	100.00; 51.43
676	230.89325	229.885975	C6H2Cl4O	C1=C(C(=C(C(=C1Cl)Cl)O)Cl)Cl	13636	202.89834; 230.89325	0.46; 100.00	202.89834; 230.89325	0.19; 100.00	202.89834; 230.89325	4.24; 100.00
677	215.89359	214.88631	C5HCl4N	C1=C(C(=NC(=C1Cl)Cl)Cl)Cl	16990	215.89359	100	215.89359	100	215.89359	100
678	196.93222	195.924948	C6H3Cl3O	C1=C(C=C(C(=C1O)Cl)Cl)Cl	13619	168.93731; 196.93222	4.30; 100.00	168.93731; 196.93222	11.94; 100.00	86.96322; 108.96063; 118.94498; 132.96063; 146.93990; 168.93731; 196.93222	5.62; 16.20; 12.64; 20.59; 12.17; 27.39; 100.00
679	500.734	499.7267	C7H3I3O2	C1=C(C=C(C(=C1C(=O)O)I)I)I	6948	482.72344; 500.73400	100.00; 36.41	482.72344; 500.73400	77.35; 100.00	482.72344; 500.73400	82.23; 100.00
680	153.09101	152.0837296	C9H12O2	CC1=CC(=C(C(=C1O)C)C)O	12785	135.08044; 153.09101	12.90; 100.00	41.03858; 53.03858; 55.05423; 57.06988; 67.05423; 75.02293; 77.03858; 79.05423; 81.06988; 85.06479; 95.04914; 97.06479; 99.08044; 107.08553; 109.06479; 125.09609; 135.08044; 151.07536; 153.09101	9.49; 6.38; 16.95; 6.48; 10.84; 5.44; 9.79; 11.52; 12.50; 8.23; 11.23; 15.84; 10.85; 11.63; 12.25; 18.81; 15.20; 13.99; 100.00	39.02293; 41.03858; 43.05423; 53.03858; 55.05423; 65.03858; 67.05423; 75.02293; 77.03858; 79.05423; 81.03349; 81.06988; 95.04914; 109.06479; 137.05971; 151.07536	14.36; 49.79; 16.94; 45.48; 53.72; 15.75; 31.38; 28.85; 100.00; 73.99; 9.89; 38.13; 17.52; 12.83; 14.41; 27.49
681	137.09609	136.088815	C9H12O	CC1=CC(=C(C(=C1)O)C)C	12769	81.06988; 93.06988; 109.10118; 119.08553; 121.06479; 137.09609	5.62; 4.68; 7.57; 11.59; 4.23; 100.00	55.05423; 77.03858; 79.05423; 81.06988; 89.03858; 91.05423; 93.06988; 103.05423; 107.08553; 109.10118; 119.08553; 135.08044; 137.09609	34.50; 35.16; 51.04; 29.75; 49.78; 36.19; 76.90; 30.23; 62.64; 34.87; 100.00; 94.01; 45.39	39.02293; 51.02293; 53.03858; 65.03858; 67.05423; 75.02293; 77.03858; 79.05423; 81.06988; 89.03858; 91.05423; 93.06988; 103.05423; 135.08044	34.39; 28.22; 28.42; 79.65; 100.00; 48.52; 86.03; 82.63; 40.50; 37.49; 52.95; 85.38; 60.48; 38.18
682	123.09167	122.0843983	C7H10N2	CC1=CN=C(C(=N1)C)C	26808	54.03383; 68.04948; 97.07602; 123.09167	12.63; 10.32; 21.01; 100.00	42.03383; 53.03858; 54.03383; 55.05423; 56.04948; 68.04948; 80.04948; 82.06513; 95.06037; 123.09167	39.97; 24.05; 83.25; 37.46; 29.74; 29.18; 100.00; 49.74; 26.03; 87.61	42.03383; 53.03858; 54.03383; 55.05423; 56.04948; 66.03383; 68.04948; 80.04948; 82.06513; 95.06037	96.96; 87.31; 82.61; 100.00; 34.55; 36.11; 39.23; 74.26; 21.30; 22.29
683	224.92714	223.919862	C7H3Cl3O2	C1=CC(=C(C(=C1Cl)C(=O)O)Cl)Cl	5759	206.91657; 224.92714	8.83; 100.00	206.91657; 224.92714	32.96; 100.00	118.94498; 120.96063; 206.91657; 224.92714	28.04; 19.61; 33.22; 100.00
684	196.93222	195.924948	C6H3Cl3O	C1=CC(=C(C(=C1Cl)O)Cl)Cl	13618	168.93731; 196.93222	0.72; 100.00	168.93731; 196.93222	1.64; 100.00	60.98395; 96.96063; 146.93990; 166.92166; 168.93731; 196.93222	10.71; 7.39; 14.04; 7.82; 7.52; 100.00
685	137.09609	136.088815	C9H12O	CC1=C(C(=C(C=C1)C)O)C	17016	79.05423; 81.06988; 109.10118; 121.06479; 137.09609	11.95; 9.55; 6.04; 5.29; 100.00	39.02293; 41.03858; 53.03858; 55.05423; 67.05423; 77.03858; 79.05423; 81.06988; 83.08553; 89.03858; 93.06988; 107.08553; 109.10118; 137.09609	34.22; 16.57; 37.68; 60.18; 14.60; 19.73; 100.00; 80.96; 17.11; 15.06; 24.08; 13.92; 12.08; 41.04	53.03858; 55.05423; 65.03858; 67.05423; 77.03858; 79.05423; 81.06988; 89.03858; 91.05423; 93.06988; 103.05423; 119.08553	51.59; 18.58; 39.75; 46.07; 30.38; 100.00; 25.60; 19.48; 39.37; 37.12; 37.56; 25.86
686	320.90382	319.89654	C12H4Cl4O2	C1=C2C(=CC(=C1Cl)Cl)OC3=CC(=C(C=C3O2)Cl)Cl	15625	260.92714; 320.90382	0.01; 100.00	260.92714; 320.90382	0.37; 100.00	260.92714; 320.90382	4.95; 100.00
687	119.04914	118.0418648	C8H6O	C1=CC=C2C(=C1)C=CO2	9223	91.05423; 119.04914	15.32; 100.00	89.03858; 91.05423	46.05; 100.00	65.03858; 89.03858; 91.05423	43.23; 100.00; 48.63
688	91.07536	90.06807956	C4H10O2	CC(C(C)O)O	262	55.05423; 73.06479	100.00; 32.92	45.03349; 55.05423	48.86; 100.00	45.03349; 55.05423	100.00; 37.94
689	87.04406	86.03677943	C4H6O2	CC(=O)C(=O)C	650	43.01784; 45.03349	100.00; 10.87	43.01784; 69.03349	100.00; 1.39	41.00219; 43.01784	7.06; 100.00
690	123.02967	122.0223927	C4H10S2	CC(C(C)S)S	548353	89.04195; 123.02967	100.00; 47.42	55.05423; 89.04195	100.00; 44.89	55.05423; 61.01065	100.00; 55.77
691	123.09167	122.0843983	C7H10N2	CC1=C(C(=CC=C1)N)N	17593	106.06513; 123.09167	15.87; 100.00	79.05423; 94.06513; 96.08078; 106.06513; 121.07602; 123.09167	17.29; 19.91; 21.23; 65.80; 38.08; 100.00	42.03383; 44.04948; 51.02293; 53.03858; 65.03858; 67.05423; 77.03858; 79.05423; 80.04948; 107.06037; 121.07602	33.91; 22.18; 25.53; 100.00; 66.54; 78.88; 60.65; 26.47; 27.87; 37.00; 61.54
692	216.88582	215.87854	C3H6Br2O	C(C(CBr)Br)O	7281	198.87525; 216.88582	61.93; 100.00	136.95965; 216.88582	22.77; 100.00	104.93344; 118.94909; 184.85960; 198.87525	100.00; 57.16; 48.72; 87.80
693	230.86508	229.8578	C3H4Br2O2	C(C(C(=O)O)Br)Br	11746	184.85960; 230.86508	76.16; 100.00	184.85960; 230.86508	100.00; 62.16	104.93344; 184.85960	100.00; 89.76
694	128.98685	127.9795702	C3H6Cl2O	C(C(CCl)Cl)O	12018	110.97628; 128.98685	62.24; 100.00	93.01017; 110.97628; 128.98685	26.42; 15.04; 100.00	60.98395; 62.99960; 74.99960; 110.97628	100.00; 31.49; 78.57; 66.93
695	110.97628	109.9690055	C3H4Cl2	C=C(CCl)Cl	6565	74.99960; 110.97628	3.92; 100.00	74.99960; 110.97628	24.42; 100.00	60.98395; 74.99960	44.58; 100.00
696	263.87026	262.862988	C6H2Cl5N	C1=C(C=NC(=C1Cl)Cl)C(Cl)(Cl)Cl	94647	227.89359; 263.87026	1.20; 100.00	227.89359; 263.87026	0.35; 100.00	227.89359; 263.87026	100.00; 61.41
697	190.96611	189.9588348	C7H4Cl2O2	C1=CC(=C(C(=C1)Cl)Cl)C(=O)O	5765	172.95555; 190.96611	100.00; 37.07	172.95555; 190.96611	100.00; 89.83	44.99711; 49.00728; 51.02293; 60.98395; 82.96830; 84.98395; 86.99960; 96.98395; 120.96063; 144.96063; 146.97628; 172.95555; 190.96611	32.81; 15.48; 100.00; 27.76; 22.06; 99.63; 39.35; 17.99; 29.61; 19.98; 42.39; 50.00; 72.51
698	127.00758	126.0003056	C4H8Cl2	CC(C(C)Cl)Cl	24233	91.03090; 127.00758	8.95; 100.00	91.03090; 127.00758	21.92; 100.00	55.05423; 62.99960; 91.03090	61.00; 73.61; 100.00
699	156.98176	155.9744848	C4H6Cl2O2	C1COC(C(O1)Cl)Cl	7246	43.01784; 61.02841; 114.97120; 156.98176	17.36; 18.14; 9.90; 100.00	43.01784; 45.03349; 60.98395; 61.02841; 94.94498; 96.96063; 121.00508; 128.95046; 138.97120; 156.98176	48.92; 64.11; 31.83; 31.09; 17.68; 100.00; 39.61; 26.00; 39.12; 82.39	33.03349; 60.98395; 64.97887; 78.99452; 90.99452; 93.01017; 94.94498; 96.96063; 121.00508; 124.95555; 126.97120; 128.95046; 128.98685; 140.95046; 154.96611; 156.98176	12.02; 28.69; 52.70; 100.00; 13.06; 15.63; 33.65; 25.73; 25.37; 21.83; 14.37; 19.13; 13.49; 27.91; 26.59; 36.82
700	162.9712	161.9639201	C6H4Cl2O	C1=CC(=C(C(=C1)Cl)Cl)O	11334	134.97628; 162.97120	4.21; 100.00	134.97628; 162.97120	23.01; 100.00	39.02293; 43.01784; 51.02293; 60.98395; 78.99452; 84.98395; 96.96063; 98.99960; 112.97887; 132.96063; 134.97628; 162.97120	30.01; 12.71; 19.01; 71.62; 30.11; 21.20; 12.21; 17.59; 13.81; 82.51; 37.28; 100.00
701	198.98243	197.9751535	C8H4Cl2N2	C1=CC=C2C(=C1)N=C(C(=N2)Cl)Cl	16659	198.98243	100	172.96678; 198.98243	0.06; 100.00	196.96678; 198.98243	15.93; 100.00
702	236.1142	235.1069247	C10H13N5O2	C1CC(OC1CO)N2C=NC3=C(N=CN=C32)N	263976	136.06177; 236.11420; 0.0057001	100.00; 17.71; 0.0048466	109.05087; 136.06177	3.53; 100.00	55.02907; 94.03997; 107.03522; 109.05087; 119.03522; 134.04612; 136.06177; 140.09307; 234.09855	9.15; 38.21; 21.60; 39.39; 77.72; 11.30; 100.00; 8.49; 10.40
703	212.10297	211.0956913	C9H13N3O3	C1CC(OC1CO)N2C=CC(=NC2=O)N	5718	112.05054; 212.10297	100.00; 7.53	69.04472; 112.05054	4.00; 100.00	41.03858; 42.03383; 44.01309; 54.03383; 56.04948; 67.02907; 68.01309; 69.04472; 70.02874; 71.04914; 81.04472; 83.04914; 84.05562; 95.02399; 97.03964; 110.03489; 112.05054; 142.08626	8.26; 10.97; 7.48; 9.60; 16.84; 35.26; 16.16; 79.53; 6.44; 6.10; 8.14; 17.54; 15.03; 100.00; 8.67; 13.10; 64.63; 8.35
704	237.09822	236.0909403	C10H12N4O3	C1CC(OC1CO)N2C=NC3=C2N=CNC3=O	135422442	135.03014; 137.04579	2.74; 100.00	120.01924; 137.04579	4.28; 100.00	56.01309; 82.03997; 94.03997; 95.02399; 108.01924; 109.05087; 110.03489; 120.01924; 135.03014; 137.04579; 155.09274	11.79; 57.72; 24.46; 17.50; 21.24; 16.30; 91.83; 16.38; 11.87; 100.00; 14.55
705	137.10732	136.1000484	C8H12N2	CCC1=NC=CN=C1CC	27458	107.06037; 137.10732	4.28; 100.00	41.03858; 68.04948; 70.06513; 80.04948; 82.06513; 83.08553; 84.08078; 96.08078; 107.06037; 121.07602; 135.09167; 137.10732	28.01; 20.05; 17.84; 11.80; 15.08; 7.74; 9.37; 24.81; 15.86; 12.16; 57.44; 100.00	40.01818; 41.03858; 42.03383; 43.05423; 52.01818; 53.03858; 55.02907; 56.04948; 68.04948; 70.06513; 79.05423; 80.04948; 81.06988; 82.06513; 92.04948; 94.06513; 96.08078; 106.06513; 135.09167	22.58; 36.26; 31.75; 29.25; 25.66; 14.47; 15.23; 30.23; 26.48; 21.37; 11.17; 20.33; 31.12; 16.30; 11.35; 14.54; 64.51; 16.10; 100.00
706	165.09101	164.0837296	C10H12O2	CC1(CC2=C(O1)C(=CC=C2)O)C	15278	109.02841; 165.09101	13.38; 100.00	41.03858; 53.03858; 55.05423; 81.03349; 95.04914; 97.06479; 105.03349; 107.04914; 109.02841; 123.04406; 147.08044	11.14; 15.32; 15.39; 27.28; 9.61; 24.55; 7.98; 36.67; 100.00; 41.12; 22.70	39.02293; 41.03858; 51.02293; 53.03858; 55.05423; 65.03858; 67.05423; 79.05423; 81.03349; 81.06988; 83.04914; 93.03349; 93.06988; 95.04914; 97.06479; 107.04914; 109.02841; 121.06479; 123.04406; 149.05971	100.00; 61.84; 14.31; 27.88; 20.60; 44.60; 18.96; 14.51; 26.78; 20.28; 9.85; 18.95; 9.73; 12.94; 12.48; 30.68; 24.25; 9.60; 22.85; 12.42
707	161.08083	160.0735589	C7H12O4	CC(=C)C(=O)OCC(CO)O	65442	41.03858; 57.03349; 69.03349; 71.04914; 75.04406; 125.05971; 143.07027	87.79; 18.47; 100.00; 14.56; 28.19; 28.43; 24.41	41.03858; 43.05423; 55.05423; 57.03349; 69.03349; 71.04914; 99.04406	100.00; 17.09; 20.88; 28.43; 89.24; 16.74; 13.11	39.02293; 41.03858; 69.03349	28.13; 100.00; 10.86
708	219.15909	218.1518092	C11H22O4	CCCCCCCC(=O)OCC(CO)O	3033877	43.05423; 55.05423; 57.03349; 57.06988; 59.04914; 69.06988; 71.08553; 75.04406; 81.06988; 85.10118; 95.08553; 97.10118; 109.10118; 127.11174; 131.07027; 133.08592; 201.14852; 219.15909	18.81; 17.30; 13.63; 19.66; 12.85; 13.00; 19.75; 13.42; 14.68; 22.73; 12.55; 14.68; 15.51; 71.48; 21.66; 17.28; 60.37; 100.00	41.03858; 43.05423; 55.05423; 57.03349; 57.06988; 59.04914; 69.06988; 71.04914; 71.08553; 75.04406; 81.06988; 83.08553; 85.10118; 93.05462; 95.08553; 99.11683; 109.10118; 117.05462; 127.11174; 201.14852	11.93; 21.89; 30.87; 22.55; 49.72; 17.70; 22.06; 11.48; 20.29; 100.00; 11.84; 7.82; 23.37; 12.27; 11.98; 26.17; 16.08; 7.71; 22.79; 7.36	41.03858; 43.05423; 45.03349; 55.05423; 57.03349; 57.06988; 59.04914; 61.02841; 71.04914; 71.08553; 73.02841; 75.04406; 81.06988; 95.08553	59.72; 44.76; 21.35; 37.78; 12.14; 100.00; 16.58; 24.21; 8.74; 12.16; 9.00; 27.08; 16.50; 13.36
709	262.03798	261.0307082	C9H11NO6S	COC1=CC(=CC(=C1OC)C(=O)O)S(=O)(=O)N	3017698	181.04954; 262.03798	8.67; 100.00	244.02742; 262.03798	28.06; 100.00	55.01784; 57.03349; 69.03349; 71.04914; 73.02841; 79.98008; 81.03349; 81.99573; 83.01276; 85.02841; 87.00767; 87.04406; 89.05971; 95.01276; 103.98008; 105.99573; 108.01138; 111.04406; 129.99573; 132.01138; 134.02703; 148.00629; 160.00629; 161.98556; 167.03389; 172.00629; 176.00121; 178.01686; 188.00121; 192.03251; 215.99612	11.02; 5.28; 13.63; 8.65; 6.45; 5.33; 10.60; 18.03; 5.32; 17.56; 5.30; 7.93; 10.98; 32.41; 100.00; 20.72; 21.52; 12.07; 47.28; 22.83; 5.63; 12.52; 6.51; 7.29; 6.85; 5.42; 7.00; 5.06; 14.57; 6.76; 5.91
710	87.11683	86.10955045	C6H14	CC(C)C(C)C	6589	43.05423; 87.11683	53.22; 100.00	69.06988; 71.08553; 85.10118; 87.11683	75.35; 45.01; 100.00; 46.07	43.05423; 55.05423; 71.08553	100.00; 50.73; 55.68
711	123.08044	122.0731649	C8H10O	CC1=C(C(=CC=C1)O)C	10687	67.05423; 93.06988; 95.08553; 105.06988; 123.08044	4.41; 4.77; 6.75; 19.05; 100.00	39.02293; 41.03858; 65.03858; 67.05423; 77.03858; 79.05423; 93.06988; 95.08553; 105.06988; 123.08044	25.25; 19.52; 34.17; 41.32; 23.55; 53.16; 84.02; 22.05; 100.00; 20.77	41.03858; 51.02293; 53.03858; 63.02293; 65.03858; 67.05423; 77.03858; 79.05423; 105.06988	20.25; 26.23; 46.96; 36.71; 63.23; 76.29; 78.85; 100.00; 27.04
712	209.11722	208.1099444	C12H16O3	COCCC1=CC=C(C=C1)OCC2CO2	92515	121.06479; 153.09101; 177.09101; 191.10666; 209.11722	33.76; 13.89; 21.70; 13.33; 100.00	39.02293; 43.01784; 57.03349; 59.04914; 79.05423; 93.06988; 107.04914; 107.08553; 121.06479; 123.08044; 133.06479; 135.08044; 147.08044; 161.09609; 177.09101; 179.10666; 191.10666; 207.10157; 209.11722	8.98; 10.61; 61.31; 38.76; 10.19; 18.46; 25.41; 12.52; 44.43; 10.52; 11.99; 23.23; 17.81; 18.32; 46.05; 31.37; 52.18; 33.50; 100.00	43.01784; 57.03349; 79.05423; 91.05423; 93.06988; 95.04914; 95.08553; 99.08044; 103.05423; 105.06988; 107.04914; 107.08553; 109.10118; 119.04914; 121.06479; 131.04914; 133.06479; 135.08044; 145.06479; 147.08044; 159.08044; 161.09609; 207.10157	14.32; 14.05; 55.63; 100.00; 31.93; 9.09; 12.90; 9.02; 24.33; 28.77; 38.23; 13.28; 9.04; 13.94; 54.40; 39.05; 32.80; 28.86; 11.26; 20.59; 12.11; 9.05; 43.95
713	115.07536	114.0680796	C6H10O2	CCCC(=O)C(=O)C	19707	43.05423; 71.04914	100.00; 89.30	43.01784; 43.05423; 45.03349; 55.01784; 71.04914; 79.05423	79.20; 100.00; 22.28; 19.96; 60.97; 27.91	41.03858; 43.01784; 43.05423; 45.03349	52.08; 100.00; 45.49; 17.11
714	218.04478	217.0375077	C11H7NO4	C1=CC=C2C(=C1)C=C(C(=N2)C(=O)O)C(=O)O	69508	200.03422; 218.04478	100.00; 48.42	200.03422; 218.04478	100.00; 37.32	130.06513; 156.04439; 174.05495; 200.03422; 218.04478	61.92; 100.00; 20.73; 25.53; 18.29
715	122.09643	121.0891494	C8H11N	CC1=C(C(=CC=C1)N)C	6893	105.06988; 122.09643	6.65; 100.00	53.03858; 55.05423; 65.03858; 67.05423; 79.05423; 91.05423; 93.06988; 94.06513; 95.08553; 105.06988; 120.08078; 122.09643	17.14; 16.27; 21.62; 42.18; 34.34; 17.08; 59.58; 14.58; 29.31; 38.18; 14.71; 100.00	51.02293; 53.03858; 63.02293; 65.03858; 67.05423; 75.02293; 77.03858; 79.05423; 105.06988; 106.06513	42.84; 70.81; 53.50; 84.12; 60.04; 23.31; 80.86; 100.00; 20.76; 30.73
716	231.06518	230.0579088	C13H10O4	C1=CC(=CC=C1C(=O)C2=C(C=C(C=C2)O)O)O	73852	121.02841; 231.06519	99.89; 100.00	92.99711; 93.03349; 95.01276; 109.02841; 121.02841; 137.02332	15.42; 56.29; 14.56; 38.75; 52.34; 100.00	43.01784; 51.02293; 65.00219; 65.03858; 67.01784; 68.99711; 69.03349; 71.01276; 93.03349; 95.01276; 109.02841; 121.02841; 137.02332; 141.03349; 159.04406; 183.04406; 185.02332; 185.05971	19.24; 10.94; 18.69; 80.22; 23.50; 13.58; 13.17; 36.65; 67.78; 21.69; 28.46; 100.00; 28.70; 18.69; 16.96; 11.21; 13.96; 32.81
717	113.13248	112.1252005	C8H16	CC(=C)CC(C)(C)C	7868	57.06988; 71.08553	100.00; 47.10	55.05423; 57.06988; 81.06988	59.12; 100.00; 49.73	41.03858; 55.05423; 57.06988	100.00; 81.85; 72.26
718	113.13248	112.1252005	C8H16	CC(=CC(C)(C)C)C	7869	41.03858; 57.06988	10.64; 100.00	41.03858; 57.06988	39.23; 100.00	41.03858; 55.05423; 57.06988	100.00; 71.64; 45.98
719	644.7178	643.71052	C20H8Br4O5	C1=CC=C2C(=C1)C(=O)OC23C4=CC(=C(C(=C4OC5=C(C(=C(C=C35)Br)O)Br)Br)O)Br	27020	600.72797; 644.71780	0.29; 100.00	600.72797; 644.71780; 0.091495	2.45; 100.00; 0.049939	512.79672; 524.79672; 540.69158; 566.67085; 600.72797; 614.70723; 616.72288; 644.71780; 0.3026	12.20; 47.00; 19.91; 13.77; 100.00; 30.83; 37.26; 56.52; 0.24665
720	367.0629	366.055628	C16H21Cl3O3	CCCCC(CC)COC(=O)COC1=CC(=C(C=C1Cl)Cl)Cl	15998	55.05423; 57.06988; 109.10118; 111.11683; 113.05971; 115.07536; 127.07536; 129.09101; 139.07536; 141.09101; 153.12739; 169.12231; 171.13796; 236.92714; 254.93770; 337.01595; 367.06290	16.75; 20.08; 31.05; 25.02; 6.58; 22.17; 5.90; 12.19; 5.63; 8.41; 14.73; 6.19; 59.57; 6.29; 8.91; 5.68; 100.00	43.05423; 55.05423; 57.06988; 59.01276; 71.08553; 73.02841; 73.06479; 75.04406; 83.08553; 85.10118; 95.08553; 99.11683; 109.10118; 111.11683; 113.05971; 113.13248; 115.07536; 117.09101; 129.09101; 139.07536; 141.09101; 171.13796; 196.93222; 208.93222; 236.92714; 238.94279; 254.93770; 268.95335; 308.98465; 365.04725; 367.06290	46.69; 24.13; 96.33; 19.62; 16.76; 15.29; 13.32; 13.92; 37.68; 24.85; 26.24; 12.74; 28.37; 22.38; 37.64; 26.79; 41.79; 16.57; 12.95; 30.69; 34.54; 25.75; 57.42; 59.50; 100.00; 15.28; 87.66; 12.34; 18.95; 25.29; 92.44	41.03858; 43.05423; 55.05423; 57.06988; 69.06988; 71.08553; 81.06988; 83.08553; 85.10118; 87.08044; 95.08553; 97.10118; 99.11683; 109.10118; 115.07536; 196.93222; 208.93222; 367.06290	85.04; 80.06; 94.36; 93.96; 17.88; 100.00; 15.82; 23.43; 30.92; 7.44; 31.35; 11.54; 25.40; 24.80; 13.15; 16.15; 67.52; 7.58
721	355.02652	354.019242	C14H17Cl3O4	CCCCOCCOC(=O)COC1=CC(=C(C=C1Cl)Cl)Cl	17349	87.04406; 97.06479; 159.10157; 236.92714; 254.93770; 280.95335; 298.96392; 355.02652	6.61; 10.65; 10.42; 39.39; 16.02; 19.09; 4.86; 100.00	41.03858; 55.05423; 57.06988; 59.01276; 83.01276; 85.02841; 87.04406; 97.06479; 101.02332; 103.03897; 105.05462; 115.03897; 117.05462; 196.93222; 208.93222; 218.96103; 234.91149; 236.92714; 238.94279; 252.92205; 254.93770; 280.95335; 282.96900; 355.02652	8.99; 16.93; 30.79; 7.91; 7.89; 16.18; 36.13; 8.40; 5.80; 19.29; 7.42; 6.54; 12.56; 39.60; 44.91; 5.58; 5.88; 100.00; 6.19; 6.94; 54.68; 30.26; 10.37; 6.87	41.03858; 43.05423; 45.03349; 55.05423; 57.06988; 61.02841; 73.02841; 75.04406; 85.02841; 87.04406; 89.02332; 97.06479; 101.02332; 103.03897; 105.05462; 180.93731; 182.95296; 184.96861; 186.98426; 196.93222; 202.96611; 208.93222; 210.94787; 218.96103; 220.93222; 234.91149; 236.92714; 238.94279; 242.97409; 254.93770; 280.95335	36.75; 8.00; 22.89; 23.75; 36.87; 12.68; 18.99; 4.62; 7.69; 11.45; 4.78; 15.07; 4.95; 15.76; 5.93; 9.01; 16.49; 14.37; 9.93; 24.96; 11.92; 100.00; 5.30; 5.72; 5.16; 12.41; 12.19; 12.29; 4.92; 9.29; 5.29
722	260.89412	259.886848	C6H3Cl3O3S	C1=C(C(=CC(=C1Cl)Cl)Cl)S(=O)(=O)O	80786	242.88356; 260.89412	0.62; 100.00	258.87847; 260.89412	34.86; 100.00	58.96830; 84.98395; 118.94498; 120.96063; 138.92512; 152.90601; 166.92166; 166.95642; 180.93731; 200.91745; 242.88356; 260.89412	47.69; 33.30; 31.90; 28.32; 87.99; 28.57; 41.72; 39.71; 48.28; 60.40; 25.36; 100.00
723	196.93222	195.924948	C6H3Cl3O	C1=C(C(=CC(=C1Cl)Cl)Cl)O	7271	168.93731; 196.93222	1.15; 100.00	168.93731; 196.93222	4.70; 100.00	108.96063; 118.94498; 132.96063; 146.93990; 166.92166; 168.93731; 196.93222	12.63; 11.46; 28.80; 16.90; 42.65; 25.16; 100.00
724	254.9377	253.930427	C8H5Cl3O3	C1=C(C(=CC(=C1Cl)Cl)Cl)OCC(=O)O	1480	236.92714; 254.93770	61.05; 100.00	59.01276; 208.93222; 236.92714; 254.93770	16.50; 45.10; 66.67; 100.00	106.94498; 146.97628; 148.95555; 174.97120; 180.93731; 182.95296; 208.93222	5.14; 9.84; 10.12; 5.29; 14.76; 8.07; 100.00
725	253.14344	252.1361591	C14H20O4	CCOC1=CC(=C(C=C1C(=O)C)OCC)OCC	113124	225.11214; 253.14344	7.74; 100.00	179.07027; 207.10157; 225.11214; 235.13287; 253.14344	9.78; 17.04; 9.80; 6.10; 100.00	43.01784; 45.03349; 69.03349; 71.04914; 81.03349; 83.04914; 93.03349; 95.04914; 111.04406; 125.05971; 127.07536; 129.09101; 131.10666; 139.07536; 151.07536; 179.07027; 181.08592; 183.10157; 193.08592; 195.06519; 195.10157; 197.08084; 197.11722; 207.10157; 209.08084; 209.11722; 211.13287; 223.09649; 225.11214	52.21; 22.16; 49.95; 18.05; 29.66; 24.00; 22.84; 40.43; 19.36; 42.72; 66.04; 16.79; 19.79; 27.67; 22.60; 63.38; 37.26; 20.50; 19.05; 100.00; 22.61; 38.71; 16.30; 28.66; 45.19; 28.81; 18.80; 19.73; 58.26
726	197.08083	196.0735589	C10H12O4	CCCC(=O)C1=CC(=C(C=C1O)O)O	15008	179.07027; 197.08084	6.31; 100.00	43.01784; 43.05423; 55.05423; 71.04914; 73.06479; 97.06479; 109.02841; 125.02332; 127.03897; 137.02332; 139.03897; 153.01824; 155.03389; 169.08592; 179.07027; 195.06519; 197.08084	12.50; 26.71; 30.52; 12.06; 10.39; 7.29; 39.62; 21.42; 27.30; 23.09; 11.54; 24.87; 11.01; 10.10; 14.19; 20.02; 100.00	41.00219; 41.03858; 43.05423; 45.03349; 53.00219; 55.01784; 55.05423; 57.03349; 69.03349; 71.04914; 77.03858; 79.05423; 81.03349; 81.06988; 83.01276; 83.04914; 85.02841; 91.01784; 95.04914; 97.02841; 97.06479; 107.04914; 109.02841; 109.06479; 125.02332; 135.04406; 137.02332; 139.03897; 139.07536; 153.01824; 195.06519	16.07; 40.71; 46.53; 15.58; 46.28; 100.00; 13.35; 18.41; 16.21; 54.54; 23.69; 36.57; 15.79; 20.78; 19.03; 25.07; 19.29; 22.11; 36.39; 44.92; 43.24; 25.44; 29.56; 15.34; 27.12; 19.10; 59.46; 41.55; 14.63; 58.00; 41.71
727	197.08083	196.0735589	C10H12O4	COC1=CC(=C(C=C1C=O)OC)OC	20525	169.08592	2.74	169.08592; 197.08084	7.67; 100.00	43.01784; 55.01784; 57.03349; 59.04914; 69.03349; 79.01784; 81.03349; 83.04914; 95.01276; 97.02841; 99.04406; 109.02841; 111.04406; 113.05971; 123.04406; 125.05971; 141.05462; 145.08592; 153.05462; 181.04954	11.73; 42.31; 37.37; 19.77; 15.38; 15.24; 100.00; 12.03; 15.40; 25.17; 32.33; 21.65; 62.49; 19.49; 25.23; 22.76; 12.04; 13.19; 23.33; 28.76
728	114.09134	113.084064	C6H11NO	CC1C(=NC(O1)C)C	31492	42.03383; 68.04948; 70.06513; 114.09134	12.66; 14.19; 29.25; 100.00	42.03383; 44.04948; 45.03349; 55.05423; 68.04948; 70.06513; 86.06004; 96.08078; 114.09134	69.50; 20.03; 12.39; 23.11; 47.91; 100.00; 27.23; 18.92; 72.12	39.02293; 42.03383; 44.04948; 53.03858; 54.03383; 55.05423; 68.04948; 70.06513; 80.04948	28.34; 96.83; 21.35; 22.15; 46.25; 100.00; 25.62; 45.81; 20.05
729	136.11208	135.1047994	C9H13N	CC1=CC(=C(C=C1C)N)C	8717	119.08553; 136.11208	9.66; 100.00	65.03858; 67.05423; 77.03858; 79.05423; 89.03858; 91.05423; 93.06988; 107.08553; 109.10118; 119.08553; 120.08078; 134.09643; 136.11208	13.19; 32.07; 15.17; 13.09; 14.58; 20.34; 40.51; 25.85; 17.49; 63.42; 13.75; 90.24; 100.00	41.03858; 65.03858; 67.05423; 75.02293; 77.03858; 79.05423; 89.03858; 91.05423; 93.06988; 103.05423; 107.08553; 120.08078; 134.09643	14.97; 46.04; 100.00; 17.31; 63.58; 29.49; 14.04; 22.80; 31.19; 30.64; 11.10; 16.18; 45.78
730	328.78068	327.7734	C6H3Br3O	C1=C(C=C(C(=C1Br)O)Br)Br	1483	300.78576; 328.78068	1.02; 100.00	106.94909; 328.78068	1.07; 100.00	102.91779; 116.93344; 194.84395; 196.85960; 206.84395; 224.85452; 298.77011; 328.78068	31.69; 27.28; 85.00; 69.89; 28.28; 33.66; 36.72; 100.00
731	195.94821	194.940932	C6H4Cl3N	C1=C(C=C(C(=C1Cl)N)Cl)Cl	12471	133.95588; 195.94821	0.06; 100.00	62.99960; 195.94821	0.80; 100.00	58.96830; 72.98395; 99.99485; 106.94498; 108.96063; 109.97920; 135.97153; 145.95588; 195.94821	53.01; 45.29; 41.11; 37.93; 94.57; 27.94; 37.22; 27.09; 100.00
732	182.92781	181.920531	C4HCl3N2	C1=C(N=C(N=C1Cl)Cl)Cl	77378	182.92781	100	182.92781	100	182.92781	100
733	183.92306	182.91578	C3Cl3N3	C1(=NC(=NC(=N1)Cl)Cl)Cl	7954	183.92306	100	183.92306	100	183.92306	100
734	165.09101	164.0837296	C10H12O2	CC1=CC(=C(C(=C1)C)C(=O)O)C	10194	119.08553; 165.09101	34.34; 100.00	79.05423; 105.06988; 119.08553; 147.08044; 165.09101	14.03; 15.68; 100.00; 17.20; 18.70	55.05423; 63.02293; 65.03858; 79.05423; 105.06988; 119.08553	49.24; 28.51; 30.76; 70.84; 58.73; 100.00
735	137.09609	136.088815	C9H12O	CC1=CC(=C(C(=C1)C)O)C	10698	79.05423; 107.08553; 109.10118; 119.08553; 135.08044; 137.09609	10.36; 6.19; 8.63; 8.09; 5.70; 100.00	39.02293; 41.03858; 65.03858; 67.05423; 79.05423; 81.06988; 105.06988; 107.08553; 109.10118; 119.08553; 135.08044; 137.09609	38.83; 38.11; 78.83; 57.88; 99.14; 41.98; 61.41; 65.35; 60.35; 64.76; 100.00; 87.70	41.03858; 51.02293; 55.05423; 63.02293; 65.03858; 67.05423; 79.05423; 119.08553; 121.06479	48.02; 18.90; 41.58; 55.95; 78.01; 53.77; 100.00; 20.64; 92.46
736	250.11862	249.1113414	C12H15N3O3	C=CCOC1=NC(=NC(=N1)OCC=C)OCC=C	7555	168.04037; 210.08732	68.21; 100.00	41.03858; 168.04037; 170.05602; 210.08732; 250.11862	21.58; 38.43; 31.54; 100.00; 70.32	41.03858; 84.04439; 99.05529; 127.05020; 166.02472; 168.04037; 170.05602	50.88; 6.19; 12.51; 6.26; 7.07; 58.99; 100.00
737	266.22269	265.2154125	C15H27N3O	CN(C)CC1=CC(=C(C(=C1)CN(C)C)O)CN(C)C	7026	176.10699; 221.16484; 266.22269	20.34; 89.04; 100.00	164.10699; 176.10699; 178.12264	30.10; 73.72; 100.00	58.06513; 108.08078; 148.07569; 150.09134; 162.09134; 164.10699; 166.12264; 167.15428; 176.10699; 178.12264; 179.15428; 180.13829; 182.15394; 183.14919; 185.16484; 197.16484; 236.21212; 264.20704	26.61; 9.95; 7.76; 14.39; 34.90; 34.93; 9.09; 5.69; 100.00; 80.84; 5.91; 28.50; 5.55; 11.37; 6.40; 11.16; 7.10; 9.89
738	263.23694	262.2296656	C18H30O	CC(C)(C)C1=CC(=C(C(=C1)C(C)(C)C)O)C(C)(C)C	12902	207.17434; 263.23694	28.09; 100.00	41.03858; 55.05423; 57.06988; 149.09609; 191.14304; 205.15869; 207.17434; 247.20564; 263.23694	16.39; 21.06; 39.74; 11.24; 8.60; 7.89; 18.60; 11.43; 100.00	41.03858; 55.05423; 57.06988; 81.06988; 83.08553; 95.08553; 105.06988; 107.08553; 109.10118; 121.06479; 149.09609; 181.15869; 189.12739; 189.16378; 191.14304; 247.20564; 261.22129	66.08; 59.67; 100.00; 36.30; 33.02; 20.81; 15.75; 65.56; 15.82; 27.30; 24.42; 28.54; 71.34; 14.71; 26.31; 36.48; 12.90
739	227.20056	226.1932801	C14H26O2	CC(C)CC(C)(C#CC(C)(CC(C)C)O)O	31362	43.05423; 83.08553; 109.10118; 111.11683; 125.09609; 153.12739; 191.17943; 209.18999; 227.20056	15.94; 14.21; 68.87; 19.74; 23.12; 55.23; 30.91; 100.00; 25.43	83.08553; 95.08553; 107.08553; 109.10118; 111.11683; 153.12739; 209.18999	10.93; 4.98; 15.81; 100.00; 14.09; 5.28; 6.76	41.03858; 43.05423; 57.06988; 67.01784; 69.03349; 81.06988; 83.08553; 95.08553; 97.06479; 107.08553; 109.10118; 153.12739	46.92; 100.00; 30.18; 12.21; 9.17; 16.51; 6.19; 11.31; 10.85; 22.83; 26.44; 6.41
740	331.20564	330.1983654	C24H26O	CC(C)(C1=CC=CC=C1)C2=CC(=C(C=C2)O)C(C)(C)C3=CC=CC=C3	76013	119.08553; 135.08044; 211.11174; 213.12739; 253.15869; 331.20564	89.89; 17.54; 25.19; 29.11; 31.25; 100.00	41.03858; 79.05423; 89.03858; 91.05423; 93.06988; 101.03858; 103.05423; 117.06988; 119.08553; 133.06479; 135.08044; 197.09609; 211.11174; 213.12739; 251.14304; 253.15869; 331.20564	9.05; 8.67; 8.17; 83.99; 8.47; 11.09; 13.53; 100.00; 59.47; 41.64; 38.69; 7.92; 15.85; 21.24; 12.33; 15.96; 19.65	77.03858; 79.05423; 89.03858; 91.05423; 93.06988; 103.05423; 117.06988; 119.08553; 133.06479; 133.10118; 147.11683; 183.11683; 187.11174; 195.08044; 195.11683; 197.09609; 211.11174; 251.14304; 277.15869; 279.17434; 301.15869; 303.17434; 305.18999; 315.17434; 329.18999	29.75; 22.65; 16.86; 100.00; 51.26; 20.29; 56.33; 41.84; 18.28; 28.36; 18.93; 47.51; 39.55; 19.22; 23.67; 25.15; 19.77; 35.50; 80.45; 49.72; 22.35; 19.87; 23.47; 47.02; 44.24
741	277.03928	276.0319997	C12H14Cl2O3	CCCCOC(=O)COC1=C(C=C(C=C1)Cl)Cl	7206	55.05423; 115.07536; 162.97120; 202.96611; 277.03928	9.85; 13.08; 5.38; 20.57; 100.00	43.01784; 55.05423; 57.06988; 59.01276; 73.02841; 97.06479; 115.07536; 146.97628; 162.97120; 174.97120; 176.98685; 202.96611; 220.97668; 277.03928	31.32; 41.54; 23.75; 11.56; 24.25; 29.35; 13.62; 8.64; 72.72; 37.01; 10.02; 100.00; 23.47; 23.36	41.03858; 43.01784; 43.05423; 45.03349; 51.02293; 55.05423; 57.06988; 59.01276; 73.02841; 75.00767; 102.99452; 112.97887; 132.96063; 134.97628; 141.01017; 144.96063; 146.97628; 160.95555; 162.97120; 164.98685; 166.98943; 169.00508; 174.97120; 176.98685; 186.97120; 200.95046; 202.96611; 211.02871; 277.03928	66.80; 10.44; 15.94; 7.13; 5.43; 62.36; 52.22; 15.69; 8.30; 7.50; 5.81; 34.06; 8.91; 19.77; 9.40; 43.93; 24.36; 12.02; 100.00; 6.13; 6.95; 9.90; 31.95; 6.67; 6.91; 7.82; 8.74; 9.64; 7.61
742	333.10188	332.0945999	C16H22Cl2O3	CC(C)CCCCCOC(=O)COC1=C(C=C(C=C1)Cl)Cl	24678	67.05423; 83.08553; 99.04406; 109.10118; 111.11683; 115.07536; 153.12739; 171.13796; 202.96611; 220.97668; 315.09131; 333.10188	5.20; 7.01; 6.15; 10.34; 11.78; 5.42; 8.44; 24.54; 13.92; 7.33; 6.37; 100.00	43.05423; 55.05423; 57.06988; 67.05423; 69.06988; 71.08553; 79.05423; 83.08553; 85.10118; 101.05971; 107.08553; 109.10118; 111.11683; 113.05971; 113.13248; 115.07536; 146.97628; 162.97120; 171.13796; 174.97120; 202.96611; 204.98176; 220.97668; 331.08623; 333.10188	45.69; 27.23; 23.91; 11.91; 10.75; 23.29; 6.31; 54.24; 32.88; 7.71; 35.32; 27.79; 14.00; 14.04; 7.84; 18.92; 7.86; 51.63; 20.14; 26.97; 100.00; 7.88; 20.73; 7.13; 35.22	41.03858; 43.05423; 45.06988; 55.05423; 57.06988; 61.02841; 67.05423; 69.06988; 71.08553; 81.06988; 83.08553; 93.06988; 95.08553; 99.04406; 101.05971; 107.08553; 109.10118; 112.97887; 113.05971; 134.97628; 146.97628; 161.00000; 162.97120; 166.98943; 169.00508; 174.97120; 186.97120; 200.95046; 202.96611; 204.98176; 221.11722	9.40; 54.91; 8.12; 59.52; 50.30; 6.80; 39.29; 7.94; 21.41; 8.15; 30.93; 29.60; 18.39; 6.89; 11.48; 21.07; 10.14; 11.03; 7.35; 11.01; 11.64; 6.85; 100.00; 13.34; 19.02; 39.05; 12.69; 7.38; 20.30; 9.09; 6.56
743	361.13318	360.1259001	C18H26Cl2O3	CC(C)CCCCCOC(=O)CCCOC1=C(C=C(C=C1)Cl)Cl	560105	55.05423; 57.06988; 69.06988; 71.08553; 83.08553; 107.08553; 109.10118; 111.11683; 113.13248; 188.98685; 199.16926; 230.99741; 233.01306; 343.12261; 361.13318	2.52; 2.72; 3.06; 2.46; 2.27; 3.33; 6.86; 5.71; 3.01; 5.02; 5.61; 4.39; 2.48; 3.46; 100.00	41.03858; 43.05423; 55.05423; 57.06988; 65.03858; 69.03349; 69.06988; 71.04914; 71.08553; 79.05423; 83.08553; 85.10118; 87.04406; 107.08553; 109.10118; 111.11683; 115.07536; 139.07536; 141.09101; 162.97120; 181.15869; 188.98685; 200.98685; 203.00250; 205.01815; 212.98685; 230.99741; 249.00798; 343.12261; 359.11753; 361.13318	5.24; 18.62; 13.01; 18.72; 6.58; 5.59; 7.35; 7.46; 5.90; 10.71; 9.46; 12.94; 13.89; 18.30; 36.88; 6.40; 5.46; 11.04; 14.61; 100.00; 5.36; 14.23; 5.84; 11.07; 6.90; 4.79; 20.85; 19.78; 16.72; 11.52; 34.51	41.03858; 43.05423; 55.05423; 57.06988; 59.04914; 67.05423; 69.06988; 71.04914; 71.08553; 81.06988; 87.04406; 93.06988; 105.05462; 106.94498; 107.08553; 108.96063; 109.10118; 112.97887; 115.03897; 132.96063; 134.97628; 141.09101; 160.95555; 162.97120; 165.01017; 200.98685; 203.00250; 211.13287; 361.13318	2.44; 11.70; 12.45; 11.90; 2.91; 4.56; 2.23; 5.04; 3.21; 3.79; 5.47; 6.50; 2.49; 2.26; 2.59; 3.00; 11.07; 20.45; 2.23; 4.41; 11.41; 2.15; 7.65; 100.00; 3.98; 5.88; 17.65; 2.85; 3.08
744	321.06549	320.0582144	C14H18Cl2O4	CCCCOCCOC(=O)COC1=C(C=C(C=C1)Cl)Cl	16002	97.06479; 159.10157; 162.97120; 202.96611; 220.97668; 246.99233; 321.06549	6.50; 5.02; 6.42; 32.70; 32.27; 18.67; 100.00	41.03858; 45.03349; 55.05423; 57.06988; 59.01276; 85.02841; 87.04406; 97.06479; 103.03897; 105.05462; 117.05462; 146.97628; 162.97120; 174.97120; 200.95046; 202.96611; 218.96103; 220.97668; 246.99233; 249.00798; 321.06549	7.85; 4.01; 12.26; 27.80; 4.68; 5.02; 17.20; 4.53; 8.65; 4.12; 6.34; 8.30; 47.48; 21.82; 4.68; 100.00; 6.66; 45.76; 15.32; 6.02; 6.13	41.03858; 43.05423; 45.03349; 55.05423; 57.06988; 61.02841; 73.02841; 75.04406; 85.02841; 89.05971; 97.06479; 103.03897; 105.05462; 112.97887; 132.96063; 134.97628; 146.97628; 148.99193; 151.00758; 153.02323; 160.95555; 162.97120; 166.98943; 169.00508; 174.97120; 185.00000; 186.97120; 200.95046; 202.96611; 204.98176; 220.97668	22.68; 5.15; 16.09; 17.97; 22.92; 9.22; 21.13; 6.09; 3.64; 3.89; 11.14; 10.92; 3.96; 18.24; 4.19; 12.65; 10.54; 5.36; 4.96; 3.94; 6.33; 100.00; 4.59; 10.33; 23.61; 4.58; 6.81; 5.72; 13.56; 10.39; 4.65
745	249.00798	248.0006996	C10H10Cl2O3	CCOC(=O)COC1=C(C=C(C=C1)Cl)Cl	10780	202.96611; 249.00798	38.66; 100.00	43.01784; 146.97628; 162.97120; 174.97120; 202.96611; 220.97668; 249.00798	8.42; 7.20; 28.70; 31.15; 100.00; 15.89; 17.56	29.03858; 43.01784; 44.99711; 45.03349; 47.01276; 55.01784; 57.03349; 59.01276; 69.03349; 98.99960; 112.97887; 132.96063; 134.97628; 144.96063; 146.97628; 151.00758; 153.02323; 160.95555; 162.97120; 166.98943; 169.00508; 174.97120; 186.97120; 202.96611; 204.98176	7.02; 7.15; 100.00; 14.62; 36.68; 7.82; 32.56; 8.95; 8.58; 4.38; 25.84; 7.60; 15.46; 16.04; 12.49; 7.37; 5.12; 8.96; 63.13; 10.90; 8.07; 28.60; 7.08; 9.70; 4.43
746	189.03284	188.0255633	C6H8N2O3S	C1=CC(=C(C=C1N)N)S(=O)(=O)O	66623	109.07602; 189.03284	2.11; 100.00	109.07602; 189.03284	47.60; 100.00	51.02293; 66.03383; 67.02907; 68.04948; 76.01818; 78.03383; 80.04948; 107.06037; 109.07602; 119.97499	10.63; 28.20; 9.60; 36.72; 8.53; 30.03; 47.78; 100.00; 57.29; 9.45
747	123.09167	122.0843983	C7H10N2	CC1=C(C=C(C=C1)N)N	7261	106.06513; 123.09167	19.58; 100.00	77.03858; 80.04948; 94.06513; 96.08078; 106.06513; 123.09167	11.75; 8.51; 16.73; 11.72; 45.63; 100.00	51.02293; 53.03858; 54.03383; 55.05423; 56.04948; 65.03858; 66.03383; 72.08078; 77.03858; 78.03383; 79.05423; 80.04948; 94.06513; 106.06513	79.10; 100.00; 20.48; 33.37; 27.16; 35.53; 14.93; 21.57; 95.18; 34.37; 16.93; 52.51; 35.40; 45.07
748	194.95296	193.945683	C7H5Cl3	C1=CC(=C(C=C1Cl)Cl)CCl	7212	158.97628; 194.95296	8.63; 100.00	98.99960; 158.97628	3.31; 100.00	132.96063; 158.97628	8.20; 100.00
749	262.87501	261.867739	C7H3Cl5	C1=CC(=C(C=C1Cl)Cl)C(Cl)(Cl)Cl	25607	202.89834; 262.87501	2.03; 100.00	226.89834; 262.87501	1.39; 100.00	226.89834; 262.87501	96.02; 100.00
750	214.96367	213.95639	C7H3Cl2F3	C1=CC(=C(C=C1Cl)Cl)C(F)(F)F	9443	194.95744; 214.96367	0.12; 100.00	194.95744; 214.96367	3.93; 100.00	194.95744; 214.96367	90.27; 100.00
751	191.0025	189.9952203	C8H8Cl2O	CC1=CC(=C(C(=C1Cl)C)Cl)O	8621	172.99193; 191.00250	6.43; 100.00	146.97628; 172.99193; 188.98685; 191.00250	8.62; 9.31; 8.67; 100.00	39.02293; 41.03858; 72.98395; 74.99960; 96.98395; 98.99960; 113.01525; 117.01017; 146.97628; 155.02582; 174.97120; 188.98685; 191.00250	52.50; 21.32; 47.87; 40.67; 27.94; 100.00; 32.17; 19.13; 26.57; 17.29; 15.73; 75.43; 17.86
752	161.98718	160.9799046	C6H5Cl2N	C1=CC(=C(C=C1Cl)Cl)N	11123	118.94498; 161.98718	1.27; 100.00	102.01050; 111.99485; 161.98718	6.17; 4.53; 100.00	58.96830; 60.98395; 72.98395; 76.01818; 84.98395; 98.99960; 99.99485; 108.96063; 110.97628; 111.99485; 132.96063; 133.95588; 134.97628; 161.98718	24.94; 100.00; 24.30; 32.18; 19.95; 40.48; 22.65; 24.35; 49.26; 73.73; 25.76; 14.59; 29.91; 94.39
753	174.9712	173.9639201	C7H4Cl2O	C1=CC(=C(C=C1Cl)Cl)C=O	13404	172.95555; 174.97120	7.04; 100.00	154.94498; 174.97120	5.71; 100.00	41.00219; 51.02293; 72.98395; 79.01784; 84.98395; 89.00219; 96.98395; 112.97887; 114.99452; 124.97887; 130.94498; 132.96063; 138.99452; 144.96063; 174.97120	37.13; 22.42; 21.51; 22.85; 85.35; 49.39; 100.00; 18.16; 23.86; 44.56; 44.68; 60.54; 66.99; 58.84; 20.14
754	190.96611	189.9588348	C7H4Cl2O2	C1=CC(=C(C=C1Cl)Cl)C(=O)O	5787	172.95555; 190.96611	100.00; 35.50	172.95555; 190.96611	100.00; 47.99	44.99711; 60.98395; 62.99960; 84.98395; 106.94498; 144.96063; 146.97628; 172.95555; 190.96611	26.73; 33.10; 46.96; 51.43; 28.55; 57.76; 63.25; 62.30; 100.00
755	176.98685	175.9795702	C7H6Cl2O	C1=CC(=C(C=C1Cl)Cl)CO	15684	158.97628; 176.98685	100.00; 93.30	98.99960; 158.97628	3.76; 100.00	98.99960; 130.94498; 132.96063; 158.97628	8.90; 3.63; 9.15; 100.00
756	162.9712	161.9639201	C6H4Cl2O	C1=CC(=C(C=C1Cl)Cl)O	8449	118.94498; 162.97120	3.42; 100.00	60.98395; 62.99960; 84.98395; 106.94498; 108.96063; 112.97887; 118.94498; 134.97628; 162.97120	6.56; 11.00; 6.15; 6.45; 9.03; 6.09; 7.53; 14.10; 100.00	58.96830; 72.98395; 77.00219; 84.98395; 98.99960; 106.94498; 108.96063; 112.97887; 132.96063; 134.97628; 162.97120	35.51; 39.73; 32.70; 45.69; 65.36; 40.43; 35.13; 100.00; 32.93; 43.84; 72.16
757	220.97668	219.9693994	C8H6Cl2O3	C1=CC(=C(C=C1Cl)Cl)OCC(=O)O	1486	202.96611; 220.97668	46.15; 100.00	174.97120; 202.96611; 220.97668	34.11; 100.00; 64.82	44.99711; 55.01784; 62.99960; 72.98395; 96.98395; 98.99960; 112.97887; 113.01525; 114.99452; 132.96063; 141.01017; 144.96063; 146.97628; 148.99193; 166.98943; 174.97120; 202.96611; 218.96103	16.31; 14.13; 21.18; 12.90; 13.36; 17.42; 15.37; 56.94; 20.15; 19.58; 47.32; 50.10; 79.14; 15.67; 29.31; 100.00; 16.38; 23.95
758	249.00798	248.0006996	C10H10Cl2O3	C1=CC(=C(C=C1Cl)Cl)OCCCC(=O)O	1489	203.00250; 230.99741; 249.00798	12.81; 13.96; 100.00	41.03858; 69.03349; 87.04406; 146.97628; 160.95555; 162.97120; 174.97120; 188.98685; 200.98685; 203.00250; 230.99741; 249.00798	15.47; 6.22; 3.39; 8.03; 7.08; 100.00; 5.25; 9.87; 4.42; 6.87; 7.41; 21.08	41.03858; 44.99711; 47.01276; 55.01784; 57.03349; 59.04914; 69.03349; 85.02841; 89.01525; 98.99960; 112.97887; 113.01525; 132.96063; 134.97628; 138.99452; 141.01017; 146.97628; 148.99193; 153.01017; 160.95555; 162.97120; 165.01017; 167.02582; 174.97120; 186.97120; 200.98685; 203.00250; 205.01815	18.83; 7.78; 5.85; 4.60; 28.24; 6.14; 6.02; 5.46; 5.30; 5.60; 17.58; 5.01; 5.87; 15.09; 5.55; 6.11; 5.97; 4.77; 9.32; 5.81; 100.00; 33.33; 5.13; 10.54; 5.16; 25.99; 20.07; 4.44
759	302.9644	301.9571207	C12H8Cl2O3S	C1=CC=C(C=C1)S(=O)(=O)OC2=C(C=C(C=C2)Cl)Cl	7327	141.00048; 302.96440	2.04; 100.00	146.97628; 162.97120; 302.96440	12.06; 18.27; 100.00	63.02293; 65.03858; 112.97887; 141.00048; 143.01613; 144.96063; 162.97120; 171.01104; 180.99539; 224.91745; 238.93310; 248.91745; 250.93310; 272.91745	9.76; 9.08; 8.44; 100.00; 7.33; 21.41; 38.01; 10.52; 16.11; 29.36; 6.89; 8.04; 15.52; 7.04
760	204.98176	203.9744848	C8H6Cl2O2	C1=CC(=C(C=C1Cl)Cl)CC(=O)O	88209	186.97120; 204.98176	19.74; 100.00	98.99960; 158.97628	2.99; 100.00	39.02293; 98.99960; 130.94498; 132.96063; 158.97628	4.15; 5.03; 3.38; 7.54; 100.00
761	148.96678	147.9595035	C4H2Cl2N2	C1=CN=C(N=C1Cl)Cl	77531	87.99485; 148.96678	1.36; 100.00	60.98395; 148.96678	0.55; 100.00	60.98395; 61.97920; 85.97920; 121.95588; 146.95113; 148.96678	29.42; 38.98; 69.55; 49.99; 31.06; 100.00
762	160.99193	159.9846556	C7H6Cl2	CC1=C(C=C(C=C1)Cl)Cl	7254	98.99960; 160.99193	11.53; 100.00	98.99960; 101.01525; 108.98395; 110.99960; 125.01525; 158.97628; 160.99193	29.98; 10.52; 14.87; 24.04; 11.47; 21.86; 100.00	39.02293; 60.98395; 65.03858; 75.02293; 98.99960; 101.01525; 108.98395; 110.99960; 125.01525; 132.96063; 160.99193	12.81; 12.94; 29.95; 76.80; 100.00; 16.56; 43.07; 47.11; 46.25; 20.87; 37.15
763	130.04628	129.0390055	C6H5F2N	C1=CC(=C(C=C1F)F)N	9709	87.00408; 130.04628	1.61; 100.00	59.02915; 86.04005; 130.04628	5.73; 10.70; 100.00	42.99785; 45.01350; 57.01350; 66.03383; 75.00408; 77.01973; 79.03538; 83.02915; 84.02440; 86.04005; 96.02440; 101.01973; 102.01498; 103.03538; 130.04628	25.56; 100.00; 40.49; 27.27; 22.88; 33.00; 36.83; 36.51; 24.08; 17.63; 24.54; 21.65; 15.27; 17.52; 62.84
764	155.03388	154.0266087	C7H6O4	C1=CC(=C(C=C1O)O)C(=O)O	1491	137.02332; 155.03389	100.00; 99.53	44.99711; 67.01784; 69.03349; 109.02841; 111.04406; 137.02332; 155.03389	13.08; 15.19; 16.48; 41.59; 100.00; 96.36; 56.39	39.02293; 43.01784; 53.00219; 67.01784; 68.99711; 69.03349; 81.03349; 83.04914; 109.02841; 111.04406	38.60; 13.05; 22.14; 31.20; 17.40; 19.79; 100.00; 13.08; 27.55; 55.28
765	215.07027	214.0629942	C13H10O3	C1=CC=C(C=C1)C(=O)C2=C(C=C(C=C2)O)O	8572	105.03349; 215.07027	40.39; 100.00	92.99711; 95.01276; 105.03349; 109.02841; 137.02332; 215.07027	11.48; 10.90; 96.10; 29.65; 100.00; 45.31	51.02293; 77.03858; 79.05423; 105.03349; 125.03858; 169.06479	3.18; 100.00; 5.00; 6.90; 3.30; 3.23
766	154.08625	153.0789786	C8H11NO2	COC1=CC(=C(C=C1)N)OC	17652	122.06004; 154.08626	47.81; 100.00	83.04914; 94.06513; 95.04914; 109.06479; 110.06004; 122.06004; 124.07569; 126.09134; 127.07536; 137.05971; 154.08626	4.13; 5.61; 19.78; 4.11; 8.07; 52.96; 11.66; 12.54; 10.54; 9.26; 100.00	39.02293; 42.03383; 51.02293; 54.03383; 56.04948; 57.03349; 66.03383; 68.04948; 69.03349; 78.03383; 80.04948; 81.03349; 83.04914; 93.03349; 94.06513; 95.04914; 96.08078; 98.06004; 100.07569; 108.04439; 110.06004; 122.06004; 124.07569; 125.05971; 138.05495	38.43; 25.82; 73.26; 62.18; 23.16; 30.15; 88.33; 33.17; 72.03; 83.25; 65.74; 59.99; 30.98; 27.42; 83.60; 31.43; 40.86; 27.59; 49.87; 43.19; 57.39; 100.00; 33.96; 29.23; 28.55
767	139.11174	138.1044651	C9H14O	CC1C=C(CCC1C=O)C	93375	67.05423; 69.06988; 81.06988; 83.08553; 95.08553; 107.08553; 109.10118; 121.10118	25.27; 12.64; 19.88; 32.79; 16.65; 22.57; 100.00; 29.90	41.03858; 55.05423; 69.06988; 79.05423; 81.06988; 83.08553; 93.06988; 95.08553; 105.06988; 107.08553; 109.10118; 121.10118	42.81; 44.33; 44.73; 51.51; 73.41; 36.98; 50.25; 67.25; 33.89; 35.97; 100.00; 50.74	41.03858; 65.03858; 67.05423; 69.06988; 79.05423; 81.06988; 91.05423; 93.06988; 95.08553; 105.06988; 109.10118	76.17; 61.64; 92.91; 100.00; 66.19; 76.91; 59.40; 58.17; 42.04; 57.75; 44.58
768	122.09643	121.0891494	C8H11N	CC1=CC(=C(C=C1)N)C	7250	105.06988; 122.09643	9.23; 100.00	65.03858; 79.05423; 93.06988; 95.08553; 105.06988; 106.06513; 120.08078; 122.09643	12.35; 25.71; 10.65; 11.56; 67.42; 14.05; 38.95; 100.00	39.02293; 41.03858; 51.02293; 53.03858; 63.02293; 65.03858; 67.05423; 75.02293; 77.03858; 79.05423; 80.04948; 105.06988; 120.08078	20.55; 24.49; 34.95; 29.45; 33.94; 89.51; 40.70; 13.47; 33.88; 100.00; 15.62; 25.63; 20.25
769	123.08044	122.0731649	C8H10O	CC1=CC(=C(C=C1)O)C	7771	67.05423; 79.05423; 95.08553; 105.06988; 107.04914; 123.08044	7.55; 5.05; 6.62; 8.12; 4.89; 100.00	39.02293; 65.03858; 67.05423; 79.05423; 93.06988; 95.08553; 105.06988; 107.04914; 123.08044	11.84; 33.57; 27.21; 46.07; 45.15; 39.13; 100.00; 17.47; 61.62	39.02293; 41.03858; 51.02293; 53.03858; 63.02293; 65.03858; 67.05423; 77.03858; 79.05423; 89.03858	23.74; 21.79; 22.72; 32.48; 32.29; 88.66; 40.47; 46.49; 100.00; 21.43
770	277.03928	276.0319997	C12H14Cl2O3	CC(C)COC(=O)COC1=C(C=C(C=C1)Cl)Cl	15580	202.96611; 220.97668; 277.03928	15.63; 12.39; 100.00	41.03858; 43.01784; 57.06988; 59.01276; 73.02841; 146.97628; 162.97120; 174.97120; 202.96611; 220.97668; 277.03928	18.97; 13.78; 40.32; 34.36; 21.99; 13.24; 61.11; 23.48; 100.00; 67.07; 22.48	41.03858; 43.05423; 55.05423; 57.06988; 59.01276; 59.04914; 98.99960; 144.96063; 146.97628; 162.97120; 169.00508; 174.97120; 202.96611	100.00; 12.55; 17.39; 25.65; 3.41; 5.46; 3.57; 26.88; 12.41; 17.05; 3.21; 8.29; 3.57
771	207.17434	206.1670653	C14H22O	CC(C)(C)C1=CC(=C(C=C1)O)C(C)(C)C	7311	95.04914; 151.11174; 207.17434	10.57; 32.03; 100.00	39.02293; 41.03858; 55.05423; 57.06988; 133.10118; 135.08044; 149.09609; 151.11174; 207.17434	18.99; 15.28; 100.00; 41.89; 23.18; 14.80; 26.51; 33.98; 62.60	39.02293; 41.03858; 55.05423; 57.06988; 67.05423; 81.06988; 83.08553; 95.08553; 105.06988; 107.08553; 121.10118; 133.06479; 133.10118; 191.14304	20.86; 100.00; 38.72; 63.81; 15.08; 20.71; 22.32; 19.90; 22.18; 88.48; 25.32; 15.28; 16.49; 17.08
772	235.20564	234.1983654	C16H26O	CCC(C)(C)C1=CC(=C(C=C1)O)C(C)(C)CC	8455	41.03858; 43.05423; 65.03858; 71.08553; 149.09609; 165.12739; 169.15869; 235.20564	10.26; 19.36; 12.49; 65.88; 6.79; 15.56; 17.89; 100.00	41.03858; 43.05423; 55.05423; 57.06988; 65.03858; 69.06988; 71.08553; 95.04914; 135.08044; 165.12739; 235.20564	69.93; 34.85; 59.80; 24.30; 38.65; 53.88; 100.00; 10.13; 10.94; 19.27; 18.11	39.02293; 41.03858; 43.05423; 55.05423; 57.06988; 65.03858; 67.05423; 69.06988; 71.08553; 79.05423; 81.06988; 95.04914; 95.08553; 97.06479; 105.06988; 117.06988; 121.10118; 135.11683; 163.11174; 219.17434	23.23; 95.22; 100.00; 51.87; 86.39; 24.87; 30.09; 22.61; 45.60; 15.73; 17.79; 13.18; 14.56; 24.46; 31.84; 18.15; 15.99; 14.66; 12.99; 14.01
773	135.99977	134.9924895	C2H5N3S2	C(=S)(N)NC(=S)N	2758725	77.01680; 135.99977	28.71; 100.00	118.97322; 135.99977	100.00; 99.17	59.99025; 101.94667	100.00; 7.78
774	234.99233	233.9850495	C9H8Cl2O3	COC(=O)COC1=C(C=C(C=C1)Cl)Cl	1488	202.96611; 234.99233	49.11; 100.00	160.95555; 162.97120; 174.97120; 202.96611; 234.99233	9.63; 100.00; 14.30; 22.44; 8.20	43.01784; 45.03349; 55.01784; 59.01276; 62.99960; 106.94498; 112.97887; 113.01525; 114.99452; 118.94498; 120.96063; 132.96063; 134.97628; 141.01017; 144.96063; 146.97628; 160.95555; 162.97120; 166.98943; 174.97120; 202.96611; 232.97668	8.94; 8.27; 13.38; 8.64; 12.76; 12.93; 60.28; 11.99; 11.00; 7.34; 8.07; 17.60; 26.03; 8.48; 41.44; 45.20; 17.27; 100.00; 14.93; 82.99; 10.39; 12.82
775	105.09101	104.0837296	C5H12O2	CC(CC(C)O)O	12262	69.06988; 87.08044	100.00; 48.82	41.03858; 45.03349; 69.06988; 87.08044	20.97; 19.61; 100.00; 27.38	41.03858; 45.03349; 69.06988; 71.04914	100.00; 58.38; 32.75; 15.90
776	101.05971	100.0524295	C5H8O2	CC(=O)CC(=O)C	31261	43.01784; 83.04914	100.00; 6.57	43.01784; 65.03858	100.00; 33.82	43.01784; 65.03858	100.00; 17.97
777	223.154	222.1467238	C10H22O5	COCCOCCOCCOCCOC	8925	45.03349; 59.04914; 71.04914; 73.06479; 101.05971; 103.07536; 117.09101; 147.10157; 191.12779; 223.15400	22.51; 64.38; 77.80; 34.98; 25.79; 100.00; 31.86; 42.79; 31.13; 58.87	45.03349; 57.03349; 59.04914; 73.06479; 75.04406; 77.05971; 89.05971; 103.07536; 121.08592; 133.08592; 223.15400	43.94; 19.59; 100.00; 18.41; 21.53; 68.94; 44.90; 26.02; 14.84; 18.46; 13.91	45.03349; 47.04914; 57.03349; 59.04914; 71.04914; 73.06479; 75.04406; 89.05971; 103.07536	100.00; 14.51; 25.29; 75.49; 20.30; 45.60; 27.22; 17.35; 29.12
778	209.13835	208.1310737	C9H20O5	COCCOCCOCCOCCO	90263	45.03349; 59.04914; 63.04406; 71.04914; 73.06479; 87.04406; 89.05971; 103.07536; 115.07536; 133.08592; 147.10157	100.00; 51.79; 27.34; 68.80; 46.68; 16.09; 45.69; 21.66; 22.19; 19.62; 35.75	45.03349; 57.03349; 59.04914; 63.04406; 75.04406; 77.05971; 89.05971	100.00; 11.18; 70.60; 25.04; 21.49; 21.23; 37.00	45.03349; 57.03349; 59.04914; 71.04914; 73.06479; 75.04406; 89.05971; 103.07536	100.00; 33.31; 53.04; 13.21; 30.60; 20.82; 13.49; 12.66
779	251.20056	250.1932801	C16H26O2	CCC(C)(C)C1=CC(=C(C=C1O)C(C)(C)CC)O	6610	43.05423; 71.08553; 111.04406; 165.09101; 181.12231; 185.15361; 251.20056	4.10; 16.56; 4.22; 9.95; 27.10; 5.98; 100.00	41.03858; 43.05423; 55.05423; 57.06988; 69.06988; 71.08553; 73.10118; 109.02841; 111.04406; 115.07536; 151.07536; 179.10666; 181.12231; 251.20056	30.89; 17.61; 51.40; 35.25; 25.05; 72.24; 19.00; 100.00; 16.93; 14.14; 13.06; 14.90; 54.36; 12.50	41.00219; 41.03858; 43.05423; 55.05423; 57.06988; 65.03858; 67.05423; 69.06988; 71.08553; 91.05423; 93.06988; 95.08553; 109.10118; 111.04406; 113.05971; 125.09609; 131.14304; 135.08044; 151.07536; 153.09101; 163.11174; 179.10666; 185.15361; 205.15869; 235.16926	38.31; 55.97; 67.77; 53.07; 83.35; 25.88; 68.52; 20.62; 100.00; 75.58; 39.24; 95.63; 38.33; 42.49; 32.94; 35.63; 25.36; 31.93; 34.94; 22.06; 36.81; 22.00; 31.62; 43.44; 29.18
780	161.98718	160.9799046	C6H5Cl2N	C1=CC(=C(C=C1Cl)N)Cl	7262	99.99485; 161.98718	1.00; 100.00	134.97628; 161.98718	6.05; 100.00	39.02293; 41.03858; 72.98395; 74.99960; 77.01525; 84.98395; 98.99960; 99.99485; 102.01050; 111.99485; 132.96063; 134.97628; 161.98718	6.61; 6.50; 11.39; 12.39; 16.26; 16.75; 14.25; 7.72; 10.52; 12.86; 21.31; 10.66; 100.00
781	190.96611	189.9588348	C7H4Cl2O2	C1=CC(=C(C=C1Cl)C(=O)O)Cl	5784	172.95555; 190.96611	100.00; 28.76	172.95555; 190.96611	100.00; 64.56	72.98395; 84.98395; 118.94498; 120.96063; 146.97628; 172.95555; 190.96611	15.78; 47.02; 33.59; 22.55; 10.78; 100.00; 39.93
782	162.9712	161.9639201	C6H4Cl2O	C1=CC(=C(C=C1Cl)O)Cl	66	118.94498; 162.97120	5.82; 100.00	43.01784; 134.97628; 162.97120	6.72; 7.36; 100.00	60.98395; 72.98395; 84.98395; 96.98395; 98.99960; 132.96063; 134.97628; 162.97120	20.05; 22.94; 26.72; 17.60; 55.35; 100.00; 36.04; 72.61
783	119.01613	118.0088506	C4H6O2S	C1C=CCS1(=O)=O	6498	53.03858; 55.05423; 119.01613	56.75; 27.40; 100.00	39.02293; 41.03858; 78.98483; 119.01613	62.89; 68.03; 19.58; 100.00	39.02293; 60.97426; 64.96918	9.90; 100.00; 10.54
784	150.94529	149.9380116	C2H2N2S3	C1(=S)NNC(=S)S1	2723630	106.97322; 150.94529	0.20; 100.00	76.95142; 150.94529	24.42; 100.00	76.95142; 150.94529	100.00; 20.21
785	188.04728	187.0400063	C8H10ClNO2	COC1=CC(=C(C=C1N)OC)Cl	22833	156.02107; 188.04728	2.36; 100.00	57.03349; 117.01017; 144.02107; 152.07060; 156.02107; 161.03638; 171.02073; 188.04728	5.24; 3.39; 3.06; 3.81; 13.89; 6.46; 6.54; 100.00	40.01818; 42.03383; 44.04948; 55.01784; 57.03349; 59.04914; 60.98395; 62.99960; 68.04948; 70.06513; 81.03349; 84.04439; 84.98395; 86.99960; 96.04439; 98.06004; 99.99485; 102.99452; 114.01050; 116.02615; 117.01017; 119.02582; 129.01017; 130.00542; 132.02107; 142.00542; 144.02107; 156.02107; 158.03672; 172.01598; 186.03163	16.26; 16.24; 26.00; 50.81; 47.21; 17.77; 34.16; 38.23; 23.45; 18.65; 68.75; 70.74; 36.67; 32.37; 17.72; 44.00; 38.11; 100.00; 21.84; 28.27; 71.94; 25.42; 21.02; 23.34; 65.63; 16.95; 43.41; 27.24; 17.96; 24.49; 39.98
786	181.03515	180.027872	C6H12O2S2	CC1(CSC(CS1)(C)O)O	62105	120.97763; 122.99328; 134.99328; 145.01402; 163.02458; 181.03515	7.56; 13.49; 8.39; 24.24; 100.00; 53.63	89.00556; 104.98272; 120.97763; 122.99328	44.13; 100.00; 19.40; 95.74	39.02293; 41.03858; 44.97935; 45.03349; 46.99500; 58.99500; 73.01065; 77.00556; 91.02121; 104.98272	12.07; 18.07; 23.45; 10.01; 100.00; 22.90; 9.12; 71.59; 23.68; 9.79
787	291.25299	290.2457096	C16H34O4	CC(C)(C)OOC(C)(C)CCC(C)(C)OOC(C)(C)C	6545	57.06988; 201.18491; 235.19039; 291.25299	21.37; 31.92; 40.22; 100.00	57.06988; 127.11174; 129.12739; 143.10666; 161.11722; 179.12779; 201.18491; 217.17982; 235.19039	18.90; 18.44; 20.82; 78.22; 100.00; 17.56; 9.87; 22.70; 13.31	55.05423; 57.03349; 57.06988; 69.06988; 71.08553; 73.06479; 75.04406; 85.06479; 87.08044; 89.05971; 103.07536; 127.11174; 129.12739; 275.22169	17.60; 8.70; 100.00; 10.52; 17.18; 8.24; 11.44; 38.73; 8.61; 9.74; 6.44; 6.70; 9.37; 7.16
788	143.10666	142.0993797	C8H14O2	CC(C)(C#CC(C)(C)O)O	8883	107.08553; 125.09609	100.00; 32.69	67.05423; 107.08553	64.83; 100.00	65.03858; 67.05423; 107.08553	96.23; 100.00; 48.00
789	122.09643	121.0891494	C8H11N	CC1=CC(=C(C=C1)C)N	7259	79.05423; 105.06988; 122.09643	6.95; 13.59; 100.00	55.05423; 65.03858; 75.02293; 77.03858; 79.05423; 80.04948; 82.06513; 89.03858; 93.06988; 105.06988; 106.06513; 122.09643	13.06; 21.76; 20.48; 33.04; 45.99; 27.84; 17.75; 12.32; 14.10; 67.20; 56.07; 100.00	51.02293; 53.03858; 55.05423; 65.03858; 67.05423; 75.02293; 77.03858; 79.05423; 80.04948; 105.06988; 106.06513	21.12; 27.80; 31.12; 42.02; 16.68; 32.83; 90.88; 100.00; 13.49; 44.64; 26.44
790	187.04234	186.0350654	C8H10O3S	CC1=CC(=C(C=C1)C)S(=O)(=O)O	11868	105.06988; 187.04234	52.54; 100.00	77.03858; 79.05423; 105.06988; 107.08553; 185.02669; 187.04234	28.00; 28.89; 100.00; 11.28; 12.34; 35.11	77.03858; 79.05423; 103.05423; 105.06988	100.00; 47.09; 56.34; 44.10
791	97.06479	96.05751487	C6H8O	CC1=CC=C(O1)C	12266	53.03858; 55.05423; 79.05423; 97.06479	60.58; 32.96; 100.00; 97.98	39.02293; 53.03858; 77.03858; 79.05423; 97.06479	48.24; 100.00; 60.41; 76.37; 82.63	39.02293; 41.00219; 53.03858; 63.02293; 77.03858; 79.05423; 81.03349	41.57; 16.97; 100.00; 37.87; 30.25; 34.07; 22.75
792	147.13796	146.1306798	C8H18O2	CC(C)(CCC(C)(C)O)O	8031	55.05423; 111.11683; 129.12739	22.22; 100.00; 50.99	69.06988; 71.08553; 87.08044; 111.11683; 113.09609; 129.12739	45.17; 17.97; 12.02; 100.00; 32.12; 28.71	41.03858; 43.05423; 55.05423; 59.04914; 69.06988	58.96; 34.47; 94.50; 30.00; 100.00
793	123.08044	122.0731649	C8H10O	CC1=CC(=C(C=C1)C)O	7267	79.05423; 95.08553; 105.06988; 123.08044	14.00; 8.61; 42.45; 100.00	41.03858; 53.03858; 55.05423; 75.02293; 77.03858; 79.05423; 89.03858; 93.06988; 105.06988; 123.08044	33.21; 20.03; 40.38; 20.43; 69.69; 87.71; 22.74; 30.04; 100.00; 24.51	39.02293; 51.02293; 53.03858; 55.05423; 65.03858; 75.02293; 77.03858; 79.05423; 105.06988	30.56; 25.75; 45.44; 23.37; 42.58; 32.11; 98.32; 100.00; 39.09
794	223.16926	222.1619799	C14H22O2	CC(C)(C)C1=CC(=C(C=C1O)C(C)(C)C)O	2374	57.06988; 111.04406; 149.09609; 167.10666; 223.16926	9.86; 8.88; 8.59; 59.44; 100.00	41.03858; 55.05423; 57.06988; 109.02841; 111.04406; 149.09609; 151.07536; 165.09101; 167.10666; 223.16926	19.29; 12.84; 50.70; 100.00; 8.97; 38.10; 14.55; 21.77; 73.17; 55.91	41.03858; 55.05423; 57.06988; 81.06988; 83.08553; 85.10118; 107.08553; 109.06479; 111.08044; 133.06479; 137.09609; 141.09101; 149.09609; 151.07536; 181.15869	36.49; 50.16; 100.00; 48.93; 25.70; 31.85; 59.91; 41.81; 19.44; 32.52; 18.15; 19.37; 45.38; 26.98; 20.75
795	151.01066	150.0033886	C2H6N4S2	C(=S)(N)NNC(=S)N	2724564	133.98412; 151.01066	12.27; 100.00	92.02769; 133.98412; 151.01066	43.16; 100.00; 97.73	59.99025; 62.00590; 75.00115	100.00; 25.01; 34.67
796	99.00767	98.00039392	C4H2O3	C1=CC(=O)OC1=O	7923	53.00219; 71.01276; 99.00767	26.21; 56.11; 100.00	53.00219; 55.01784; 80.99711; 99.00767	100.00; 46.27; 59.28; 42.48	44.99711; 53.00219	100.00; 80.44
797	115.07536	114.0680796	C6H10O2	CC(=O)CCC(=O)C	8035	43.01784; 71.04914; 79.05423; 97.06479	48.43; 27.07; 76.01; 100.00	43.01784; 55.05423; 71.04914; 79.05423	47.23; 42.23; 32.11; 100.00	43.01784; 45.03349; 79.05423	95.99; 25.73; 100.00
798	195.17434	194.1670653	C13H22O	CC1CCC2(O1)C(=CCCC2(C)C)C	61953	69.06988; 85.06479; 93.06988; 121.10118; 123.11683; 135.11683; 137.13248; 139.11174; 149.13248; 151.14813; 177.16378; 195.17434; 0.1652	4.08; 5.47; 3.19; 4.53; 3.49; 3.42; 8.76; 3.26; 5.55; 3.45; 8.95; 100.00; 0.045822	41.03858; 55.05423; 67.05423; 69.06988; 81.06988; 83.04914; 85.06479; 93.06988; 109.10118; 113.13248; 121.10118; 123.08044; 123.11683; 125.09609; 125.13248; 133.10118; 135.11683; 137.13248; 139.11174; 149.13248; 153.12739; 177.16378; 195.17434	47.95; 37.39; 24.80; 30.94; 28.77; 26.37; 100.00; 81.58; 14.01; 33.41; 59.16; 18.21; 61.41; 51.10; 18.10; 18.34; 49.22; 55.92; 24.77; 32.10; 31.96; 17.21; 31.55	39.02293; 41.03858; 43.05423; 45.03349; 53.03858; 55.05423; 57.06988; 67.05423; 79.05423; 81.03349; 81.06988; 83.04914; 85.06479; 93.06988; 121.10118; 125.09609; 133.10118; 135.11683; 149.13248; 151.14813; 179.14304	64.96; 100.00; 34.11; 22.75; 33.06; 18.97; 23.18; 47.03; 14.61; 24.72; 19.84; 43.39; 40.99; 28.32; 11.95; 16.01; 29.34; 20.13; 44.49; 20.94; 24.02
799	202.22777	201.2204979	C11H27N3	CN(C)CCCN(C)CCCN(C)C	77463	86.09643; 202.22777	2.03; 100.00	86.09643; 157.16993; 202.22777	100.00; 15.96; 14.86	58.06513; 60.08078; 72.08078; 84.08078; 86.09643	58.01; 11.60; 37.32; 10.47; 100.00
800	153.09101	152.0837296	C9H12O2	CC1=CC(=O)CC(C1=O)(C)C	62374	57.06988; 81.03349; 83.04914; 97.06479; 111.08044; 125.09609; 135.08044; 151.07536; 153.09101	4.16; 4.27; 9.05; 5.09; 5.95; 13.53; 6.15; 4.33; 100.00	41.03858; 43.01784; 43.05423; 55.01784; 55.05423; 57.06988; 65.03858; 69.03349; 71.04914; 79.05423; 81.06988; 83.04914; 93.03349; 95.04914; 109.06479; 111.08044; 135.08044; 151.07536; 153.09101	90.81; 23.09; 61.64; 32.49; 64.63; 61.63; 20.87; 60.68; 22.31; 28.95; 59.25; 44.89; 31.09; 100.00; 21.77; 26.57; 99.90; 42.50; 50.12	39.02293; 41.00219; 41.03858; 43.01784; 43.05423; 55.05423; 63.02293; 65.03858; 67.05423; 69.03349; 79.01784; 81.03349; 83.04914; 109.06479; 151.07536	24.99; 24.65; 100.00; 31.02; 19.58; 37.27; 9.48; 11.50; 13.60; 11.02; 7.76; 8.41; 12.04; 9.14; 8.23
801	187.20564	186.1983654	C12H26O	CC(C)CC(C)CC(CC(C)C)O	61056	43.05423; 57.06988; 73.06479; 85.10118; 87.08044; 89.09609; 99.11683; 111.11683; 113.13248; 129.12739; 131.14304; 187.20564	41.96; 40.76; 32.27; 100.00; 43.16; 35.17; 42.05; 67.52; 30.50; 86.73; 30.11; 45.16	41.03858; 43.05423; 57.06988; 59.08553; 69.06988; 83.08553; 85.10118; 99.11683; 111.11683; 113.13248	16.83; 34.07; 90.28; 16.81; 15.11; 47.81; 100.00; 56.28; 12.79; 15.36	41.03858; 43.05423; 55.05423; 57.06988; 69.06988; 83.08553; 85.10118; 111.11683; 125.13248	59.92; 35.42; 17.70; 100.00; 15.04; 44.94; 29.67; 17.93; 9.43
802	185.18999	184.1827154	C12H24O	CC(C)CC(C)CC(=O)CC(C)C	61057	43.05423; 57.06988; 59.08553; 69.06988; 83.08553; 85.10118; 99.11683; 127.11174; 185.18999	45.45; 18.77; 9.30; 17.85; 12.07; 100.00; 23.71; 10.19; 12.71	41.03858; 43.05423; 57.06988; 69.06988; 81.06988; 83.08553; 85.06479; 85.10118; 87.08044; 99.11683; 109.10118; 111.11683; 127.11174	18.67; 26.96; 26.80; 22.90; 20.37; 100.00; 37.45; 44.25; 14.08; 18.56; 35.66; 13.75; 14.19	41.03858; 43.05423; 55.05423; 57.06988; 81.06988; 83.08553; 95.08553; 99.11683; 109.10118	100.00; 13.89; 23.62; 89.51; 32.57; 17.40; 7.43; 11.23; 7.38
803	221.15361	220.1463299	C14H20O2	CC(C)(C)C1=CC(=O)C=C(C1=O)C(C)(C)C	12867	165.09101; 193.15869; 221.15361	32.70; 8.31; 100.00	39.02293; 41.03858; 55.05423; 57.06988; 163.07536; 165.09101; 221.15361	22.34; 13.20; 100.00; 29.97; 16.44; 22.46; 24.64	39.02293; 41.03858; 55.05423; 57.06988; 65.03858; 67.05423; 81.06988; 83.08553; 111.08044; 147.04406; 149.05971; 205.12231	25.86; 32.75; 52.88; 100.00; 14.63; 20.29; 35.16; 23.05; 17.70; 25.52; 14.12; 20.18
804	207.17434	206.1670653	C14H22O	CCC(C)C1=C(C(=CC=C1)C(C)CC)O	21685	57.06988; 95.04914; 133.10118; 151.11174; 207.17434	18.68; 10.36; 4.36; 17.61; 100.00	41.03858; 43.05423; 55.05423; 57.06988; 59.08553; 95.04914; 99.08044; 121.06479; 131.08553; 133.10118; 135.08044; 149.09609; 151.11174; 153.12739; 205.15869; 207.17434	13.51; 5.11; 19.52; 45.39; 7.74; 5.65; 5.36; 11.19; 5.89; 35.57; 10.03; 13.39; 21.69; 6.95; 35.38; 100.00	41.03858; 43.05423; 55.05423; 57.06988; 71.08553; 77.03858; 81.06988; 83.08553; 93.06988; 95.08553; 105.06988; 107.08553; 113.09609; 113.13248; 115.11174; 117.12739; 119.04914; 119.08553; 121.06479; 121.10118; 125.09609; 133.10118; 135.08044; 149.09609	61.80; 28.71; 38.24; 77.39; 21.67; 37.15; 100.00; 55.42; 24.08; 99.52; 27.17; 35.15; 14.65; 16.59; 31.07; 20.98; 25.97; 13.96; 29.13; 14.96; 14.10; 13.93; 46.09; 16.37
805	110.07127	109.0639972	C5H7N3	C1=CC(=NC(=C1)N)N	8861	83.06037; 110.07127	1.04; 100.00	66.03383; 110.07127	11.67; 100.00	39.02293; 43.02907; 51.02293; 66.03383	20.07; 16.99; 39.48; 100.00
806	176.99808	175.9908036	C6H6Cl2N2	C1=C(C=C(C(=C1Cl)N)Cl)N	11860	141.02140; 176.99808	4.44; 100.00	141.02140; 176.99808	21.79; 100.00	54.03383; 60.98395; 90.01050; 99.99485; 111.99485; 114.01050; 141.02140	12.53; 8.50; 10.44; 12.33; 15.04; 100.00; 99.08
807	176.00283	174.9955546	C7H7Cl2N	CC1=C(C(=C(C=C1)Cl)N)Cl	116529	140.02615; 176.00283	2.62; 100.00	173.98718; 176.00283	15.49; 100.00	72.98395; 74.99960; 75.99485; 77.01525; 99.99485; 113.01525; 114.01050; 123.99485; 132.96063; 140.02615; 147.97153; 149.98718; 173.98718	17.19; 21.30; 10.79; 26.47; 10.97; 45.59; 21.76; 15.17; 13.75; 100.00; 28.45; 12.19; 42.72
808	174.9712	173.9639201	C7H4Cl2O	C1=CC(=C(C(=C1)Cl)C=O)Cl	6737	132.96063; 174.97120	5.13; 100.00	130.94498; 136.97887; 172.95555; 174.97120	10.39; 10.19; 10.28; 100.00	51.02293; 136.97887; 138.99452; 144.96063; 146.97628; 172.95555; 174.97120	20.42; 50.88; 58.44; 100.00; 14.22; 24.09; 23.98
809	189.9821	188.9748192	C7H5Cl2NO	C1=CC(=C(C(=C1)Cl)C(=O)N)Cl	16183	172.95555; 189.98210	23.83; 100.00	172.95555; 189.98210	37.54; 100.00	51.02293; 84.98395; 146.97628; 172.95555; 189.98210	4.42; 9.35; 3.99; 100.00; 6.89
810	244.89921	243.891934	C6H3Cl3O2S	C1=CC(=C(C(=C1)Cl)S(=O)(=O)Cl)Cl	522183	208.92253; 244.89921	0.51; 100.00	132.96063; 244.89921	1.77; 100.00	142.91197; 160.92253; 208.92253; 244.89921	10.70; 8.77; 100.00; 53.18
811	190.96611	189.9588348	C7H4Cl2O2	C1=CC(=C(C(=C1)Cl)C(=O)O)Cl	5758	172.95555; 190.96611	21.12; 100.00	172.95555; 190.96611	45.82; 100.00	51.02293; 84.98395; 130.94498; 144.96063; 146.97628; 172.95555; 190.96611	38.94; 56.15; 40.76; 50.86; 85.84; 54.63; 100.00
812	208.93222	207.924948	C7H3Cl3O	C1=CC(=C(C(=C1)Cl)C(=O)Cl)Cl	78392	172.95555; 208.93222	6.02; 100.00	172.95555; 208.93222	26.51; 100.00	172.95555; 208.93222	100.00; 4.67
813	162.9712	161.9639201	C6H4Cl2O	C1=CC(=C(C(=C1)Cl)O)Cl	6899	134.97628; 162.97120	1.41; 100.00	60.98395; 98.99960; 134.97628; 162.97120	5.35; 5.85; 5.96; 100.00	39.02293; 60.98395; 72.98395; 74.99960; 78.99452; 84.98395; 112.97887; 162.97120	29.08; 100.00; 39.94; 17.54; 47.99; 29.17; 26.01; 98.92
814	160.99193	159.9846556	C7H6Cl2	CC1=C(C=CC=C1Cl)Cl	8368	134.97628; 160.99193	3.71; 100.00	72.98395; 74.99960; 77.01525; 84.98395; 110.99960; 125.01525; 160.99193	9.85; 9.12; 23.02; 8.68; 28.50; 27.20; 100.00	39.02293; 75.02293; 98.99960; 110.99960; 122.99960; 125.01525	11.47; 38.42; 41.34; 11.90; 15.62; 100.00
815	150.12773	149.1204495	C10H15N	CCC1=C(C(=CC=C1)CC)N	11369	120.08078; 122.09643; 133.10118; 150.12773	5.71; 8.58; 6.34; 100.00	79.05423; 81.06988; 82.06513; 93.06988; 103.05423; 105.06988; 106.06513; 107.08553; 108.08078; 110.09643; 119.08553; 120.08078; 122.09643; 123.11683; 124.11208; 133.10118; 134.09643; 148.11208; 150.12773	11.04; 16.90; 5.71; 13.06; 5.95; 9.89; 23.65; 8.69; 18.90; 7.56; 7.11; 29.26; 33.73; 9.82; 14.47; 10.51; 14.17; 5.81; 100.00	51.02293; 53.03858; 55.05423; 65.03858; 67.05423; 70.06513; 77.03858; 79.05423; 81.06988; 91.05423; 93.06988; 103.05423; 104.04948; 105.06988; 106.06513; 107.08553; 108.08078; 117.06988; 118.06513; 120.08078; 134.09643; 148.11208	25.11; 25.87; 33.08; 22.48; 34.25; 27.74; 36.38; 100.00; 52.96; 35.03; 36.50; 37.32; 33.22; 16.65; 26.34; 33.74; 15.61; 45.43; 45.60; 27.63; 19.15; 30.48
816	140.03063	139.0233554	C7H3F2N	C1=CC(=C(C(=C1)F)C#N)F	74695	69.01350; 140.03063	0.63; 100.00	40.01818; 140.03063	1.44; 100.00	138.01498; 140.03063	6.05; 100.00
817	178.15903	177.1517496	C12H19N	CC(C)C1=C(C(=CC=C1)C(C)C)N	32484	136.11208; 178.15903	8.59; 100.00	94.06513; 119.08553; 134.09643; 136.11208; 138.12773; 176.14338; 178.15903	17.76; 13.82; 56.58; 26.82; 6.83; 100.00; 29.46	41.03858; 43.05423; 54.03383; 66.03383; 67.05423; 69.06988; 75.02293; 77.03858; 78.03383; 79.05423; 80.04948; 81.06988; 82.06513; 83.08553; 89.03858; 91.05423; 93.06988; 94.06513; 95.08553; 96.08078; 103.05423; 105.06988; 107.08553; 110.09643; 118.06513; 120.08078; 134.09643; 135.11683; 176.14338	25.71; 36.06; 29.72; 17.63; 38.21; 74.92; 23.43; 66.84; 20.72; 60.64; 20.32; 100.00; 25.91; 35.89; 26.35; 55.72; 52.40; 32.69; 43.93; 32.74; 27.82; 31.99; 29.37; 27.22; 57.97; 45.51; 18.21; 24.25; 47.92
818	213.16378	212.1565006	C16H20	CC(C)C1=CC2=C(C=C1)C=C(C=C2)C(C)C	32241	171.11683; 213.16378	12.96; 100.00	43.05423; 129.06988; 169.10118; 171.11683; 195.11683; 213.16378	40.03; 15.28; 50.34; 32.70; 20.87; 100.00	41.03858; 43.05423; 103.05423; 115.05423; 117.06988; 119.08553; 125.03858; 131.08553; 145.10118; 153.06988; 155.08553; 157.10118; 167.08553; 181.10118; 195.11683; 197.13248	61.57; 38.36; 30.79; 21.15; 26.23; 44.42; 23.00; 55.26; 42.05; 55.88; 67.41; 32.77; 37.94; 38.13; 100.00; 35.64
819	183.06518	182.0579088	C9H10O4	COC1=C(C(=CC=C1)OC)C(=O)O	15109	165.05462; 183.06519	100.00; 91.91	83.04914; 109.06479; 123.04406; 137.05971; 165.05462; 183.06519	11.88; 14.59; 24.12; 49.93; 100.00; 14.23	39.02293; 41.03858; 51.02293; 53.03858; 55.01784; 67.01784; 69.03349; 79.01784; 81.03349; 83.04914; 93.03349; 95.04914; 97.02841; 101.02332; 107.01276; 107.04914; 123.04406; 149.02332; 165.05462	26.00; 18.18; 97.80; 62.30; 28.40; 38.55; 40.59; 20.72; 100.00; 65.10; 24.47; 34.15; 21.38; 29.61; 22.92; 19.19; 23.00; 90.64; 21.38
820	137.13248	136.1252005	C10H16	CC=C(C)C=CC=C(C)C	12658	55.05423; 65.03858; 67.05423; 69.06988; 79.05423; 81.06988; 93.06988; 95.08553; 107.08553; 109.10118	23.41; 16.92; 28.82; 12.71; 32.33; 100.00; 13.29; 21.59; 12.97; 36.21	41.03858; 55.05423; 65.03858; 67.05423; 69.06988; 79.05423; 81.06988; 95.08553	26.89; 34.79; 21.12; 22.89; 28.80; 40.82; 100.00; 16.21	41.03858; 53.03858; 55.05423; 65.03858; 67.05423; 77.03858; 79.05423; 81.06988	38.21; 100.00; 35.01; 35.03; 52.58; 37.25; 50.75; 27.54
821	145.15869	144.1514153	C9H20O	CC(C)CCCC(C)(C)O	83268	43.05423; 57.06988; 69.06988; 71.08553; 85.10118; 127.14813	18.05; 12.27; 17.94; 100.00; 16.01; 21.61	41.03858; 43.05423; 69.06988; 71.08553; 85.10118	22.38; 100.00; 27.18; 28.70; 30.21	41.03858; 43.05423; 55.05423; 57.06988	100.00; 43.14; 33.83; 66.88
822	145.15869	144.1514153	C9H20O	CC(C)CC(CC(C)C)O	7957	43.05423; 69.06988; 71.08553; 85.10118; 87.08044; 103.11174; 145.15869	65.01; 88.44; 100.00; 85.98; 95.59; 63.10; 69.55	43.05423; 57.06988; 59.08553; 71.08553; 85.10118	35.58; 100.00; 21.47; 26.81; 89.00	41.03858; 43.05423; 57.06988; 69.06988; 71.08553; 83.08553	100.00; 68.95; 84.46; 56.18; 28.77; 48.08
823	122.09643	121.0891494	C8H11N	CC1=C(C(=CC=C1)C)N	6896	106.06513; 122.09643	10.70; 100.00	63.02293; 65.03858; 67.05423; 72.08078; 75.02293; 79.05423; 91.05423; 93.06988; 95.08553; 96.08078; 105.06988; 106.06513; 120.08078; 122.09643	11.37; 33.31; 24.41; 11.39; 11.23; 25.32; 39.86; 38.81; 25.74; 13.34; 14.98; 24.30; 12.74; 100.00	41.03858; 51.02293; 53.03858; 63.02293; 65.03858; 67.05423; 75.02293; 77.03858; 79.05423; 80.04948; 89.03858; 105.06988; 106.06513	82.97; 36.10; 79.11; 32.35; 78.58; 63.72; 36.73; 48.95; 100.00; 24.34; 26.18; 44.15; 94.86
824	141.12739	140.1201151	C9H16O	CC(CCC=C(C)C)C=O	61016	55.05423; 81.06988; 83.08553; 95.08553; 111.11683	70.71; 72.48; 100.00; 27.41; 24.50	41.03858; 43.05423; 55.05423; 57.06988; 67.05423; 69.06988; 79.05423; 81.06988; 83.08553	95.96; 27.38; 100.00; 16.43; 46.30; 48.63; 16.61; 65.01; 85.84	41.03858; 43.05423; 55.05423; 67.05423; 69.06988; 79.05423; 81.06988; 83.08553	87.65; 32.56; 91.15; 100.00; 35.06; 43.35; 40.92; 40.23
825	157.10118	156.0939004	C12H12	CC1=CC2=C(C=C1)C=C(C=C2)C	11387	155.08553; 157.10118	2.53; 100.00	155.08553; 157.10118	15.52; 100.00	91.05423; 115.05423; 117.06988; 129.06988; 141.06988; 155.08553	51.08; 47.38; 100.00; 29.28; 80.30; 67.64
826	159.17434	158.1670653	C10H22O	CCC(C)CCCC(C)(C)O	86751	57.06988; 69.06988; 71.08553; 83.08553; 85.10118; 87.08044; 89.09609; 141.16378; 159.17434	29.96; 29.19; 100.00; 15.52; 49.57; 15.99; 35.99; 16.81; 22.36	43.05423; 55.05423; 57.06988; 69.06988; 71.08553; 83.08553; 85.10118	63.29; 58.15; 100.00; 56.44; 89.77; 88.72; 51.05	41.03858; 43.05423; 55.05423; 71.08553	93.38; 78.92; 100.00; 68.87
[truncated: 5,020 more rows]
